# Supplementary material for: Metabolic plasticity supports a flexible nutritional symbiosis in Cardiocondyla ants
Source: Research Square preprint supplement (doi:10.21203/rs.3.rs-7898267/v1), 2025-11-10
Supplement: Supplementary file 1 [file Table-S1-ModelResults.xlsx]

## Sheet: 1-Eclosion-Rate
MODEL SUMMARY: glmer.nb(VALUE ~ WEEK * STATUS * DIET + (1 | COLONY_NAME), data = DM_FITNESS_EC, control = control)
term	estimate	std.error	statistic	p.value	conf.low	conf.high
(Intercept)	1.28679	0.371252	3.46609	0.000528082	0.559153	2.01443
WEEKWEEK 6-12	-0.190954	0.385966	-0.494741	0.620783	-0.947434	0.565527
STATUSSymbiotic	1.46152	0.515429	2.83554	0.00457481	0.451298	2.47174
DIETLP	0.0687698	0.401231	0.171397	0.863911	-0.717628	0.855167
DIETNP	0.403043	0.419937	0.959769	0.337171	-0.420019	1.2261
WEEKWEEK 6-12:STATUSSymbiotic	-0.0053486	0.521934	-0.0102476	0.991824	-1.02832	1.01762
WEEKWEEK 6-12:DIETLP	-0.47454	0.559984	-0.847417	0.396763	-1.57209	0.623008
WEEKWEEK 6-12:DIETNP	-2.75145	0.876158	-3.14036	0.0016874	-4.46869	-1.03421
STATUSSymbiotic:DIETLP	-0.630153	0.554794	-1.13583	0.256027	-1.71753	0.457225
STATUSSymbiotic:DIETNP	-1.40299	0.582791	-2.40735	0.0160686	-2.54524	-0.260735
WEEKWEEK 6-12:STATUSSymbiotic:DIETLP	0.797042	0.763724	1.04363	0.296658	-0.699829	2.29391
WEEKWEEK 6-12:STATUSSymbiotic:DIETNP	2.09989	1.02252	2.05364	0.0400104	0.0957874	4.10399
sd__(Intercept)	0.539974
EMMEANS ANALYSIS
Slope comparisons
Contrast	DIET	Estimate	SE	df	z_ratio	p_value
Aposymbiotic - Symbiotic	Ctrl	0.00535216	0.521928	Inf	0.0102546	0.991818
Aposymbiotic - Symbiotic	LP	-0.791698	0.559162	Inf	-1.41586	0.156815
Aposymbiotic - Symbiotic	NP	-2.09453	0.879884	Inf	-2.38046	0.0172911
Change in time slope estimates
STATUS	DIET	Slope	exp(Slope)	Percentage	SE	df	Lower.CL	Upper.CL
Aposymbiotic	Ctrl	-0.19095	0.826171	17.3829	0.385961	Inf	-0.94742	0.565517
Symbiotic	Ctrl	-0.19631	0.821761	17.8239	0.351022	Inf	-0.8843	0.491685
Aposymbiotic	LP	-0.6655	0.514017	48.5983	0.407626	Inf	-1.46443	0.133433
Symbiotic	LP	0.126199	1.13451	-13.4508	0.383081	Inf	-0.62463	0.877023
Aposymbiotic	NP	-2.94239	0.05274	94.7261	0.786402	Inf	-4.48371	-1.40107
Symbiotic	NP	-0.84786	0.42833	57.167	0.395328	Inf	-1.62269	-0.07303

## Sheet: 2-Pupae-Production
MODEL SUMMARY: glmer.nb(VALUE ~ TIME * STATUS * DIET + (1 | COLONY_NAME), data = DM_FITNESS_P, control = control)
term	estimate	std.error	statistic	p.value	conf.low	conf.high
(Intercept)	1.52843	0.205212	7.44806	9.47e-14	1.12622	1.93064
TIME_s	0.090691	0.151396	0.599035	0.54915	-0.20604	0.387422
STATUSSymbiotic	0.626998	0.251472	2.49331	0.012656	0.134122	1.11987
DIETLP	-0.45567	0.211502	-2.15445	0.031205	-0.87021	-0.04113
DIETNP	-1.24651	0.330162	-3.77545	0.00016	-1.89361	-0.5994
TIME_s:STATUSSymbiotic	-0.12903	0.200193	-0.64454	0.519227	-0.5214	0.26334
TIME_s:DIETLP	-0.4207	0.212358	-1.9811	0.04758	-0.83692	-0.00449
TIME_s:DIETNP	-1.46851	0.310056	-4.73629	2.18e-06	-2.07621	-0.86081
STATUSSymbiotic:DIETLP	0.244245	0.286703	0.851907	0.394266	-0.31768	0.806173
STATUSSymbiotic:DIETNP	-0.09677	0.397155	-0.24366	0.807498	-0.87518	0.68164
TIME_s:STATUSSymbiotic:DIETLP	0.347378	0.28419	1.22234	0.221578	-0.20962	0.90438
TIME_s:STATUSSymbiotic:DIETNP	0.699052	0.376979	1.85435	0.063689	-0.03981	1.43792
sd__(Intercept)	0.367297
EMMEANS ANALYSIS
Change in time slope
Contrast	DIET	Estimate	SE	df	z_ratio	p_value
Aposymbiotic - Symbiotic	Ctrl	0.129032	0.200193	Inf	0.644537	0.519227
Aposymbiotic - Symbiotic	LP	-0.21835	0.203249	Inf	-1.07428	0.282699
Aposymbiotic - Symbiotic	NP	-0.57002	0.318148	Inf	-1.79168	0.073184

## Sheet: 3-Larvae-Production
MODEL SUMMARY: glmer.nb(VALUE ~ TIME * STATUS * DIET + (1 | COLONY_NAME), data = DM_FITNESS_L, control = control)
term	estimate	std.error	statistic	p.value	conf.low	conf.high
(Intercept)	3.05864	0.200286	15.2714	1.19e-52	2.66608	3.45119
TIME	-0.00667	0.031564	-0.21138	0.83259	-0.06854	0.055192
STATUSSymbiotic	0.357849	0.280843	1.27419	0.202594	-0.19259	0.908292
DIETLP	-0.00709	0.264953	-0.02677	0.978643	-0.52639	0.512205
DIETNP	0.419997	0.282605	1.48616	0.137237	-0.1339	0.973894
TIME:STATUSSymbiotic	0.004953	0.042349	0.116967	0.906886	-0.07805	0.087956
TIME:DIETLP	-0.04924	0.041662	-1.18179	0.237289	-0.13089	0.03242
TIME:DIETNP	-0.17063	0.048692	-3.50431	0.000458	-0.26606	-0.0752
STATUSSymbiotic:DIETLP	-0.13566	0.386194	-0.35126	0.725391	-0.89258	0.62127
STATUSSymbiotic:DIETNP	-0.24654	0.39319	-0.62703	0.53064	-1.01718	0.524096
TIME:STATUSSymbiotic:DIETLP	0.028691	0.058122	0.493629	0.621568	-0.08523	0.142609
TIME:STATUSSymbiotic:DIETNP	0.061223	0.062668	0.976948	0.328595	-0.0616	0.18405
sd__(Intercept)	0.115188
EMMEANS ANALYSIS
Change in time slope
Contrast	DIET	Estimate	SE	df	z_ratio	p_value
Aposymbiotic - Symbiotic	Ctrl	-0.00495343	0.0423489	Inf	-0.116967	0.906886
Aposymbiotic - Symbiotic	LP	-0.0336443	0.0401347	Inf	-0.838284	0.401871
Aposymbiotic - Symbiotic	NP	-0.0661768	0.0458742	Inf	-1.44257	0.149142

## Sheet: 4-Colony-Mortality
MODEL SUMMARY: coxph(surv_obj ~ DIET */+ SYMBIOTIC_STATUS + frailty(COLONY_NAME_UNQ), data = tcc_stats_data)
Model	Term	HazardRatio	exp(Hazard)	Percentage	Lower95CI	Upper95CI	p.value
Symbiotic status	SYMBIOTIC_STATUSSymbiotic	0.252748	1.28756	74.7252	0.0812105	0.786614	0.0175818
Symbiotic status	frailty(COLONY_NAME_UNQ)						0.952673
Symbiotic + diet	DIETLP	0.655834	1.92675	34.4166	0.175264	2.45411	0.530953
Symbiotic + diet	DIETNP	1.52799	4.60888	-52.7986	0.484486	4.819	0.469425
Symbiotic + diet	SYMBIOTIC_STATUSSymbiotic	0.2329	1.26225	76.71	0.0742774	0.730266	0.0124514
Symbiotic + diet	frailty(COLONY_NAME_UNQ)		1	100			0.95377
Interaction	DIETLP	0.369989	1.44772	63.0011	0.06761	2.02473	0.251581
Interaction	DIETNP	1.694	5.4412	-69.4	0.477478	6.00999	0.41461
Interaction	SYMBIOTIC_STATUSSymbiotic	0.165854	1.1804	83.4146	0.018475	1.48891	0.108606
Interaction	frailty(COLONY_NAME_UNQ)						0.953655
Interaction	DIETLP:SYMBIOTIC_STATUSSy	6.31168	550.972	-531.168			0.219611
Interaction	DIETNP:SYMBIOTIC_STATUSSy	0.590319	1.80456	40.9681			0.734604
EMMEANS ANALYSIS
DIET	SYMBIOTIC_STATUS	hazard	exp(Hazard)	Percentage	SE	df	asymp.LCL	asymp.UCL
Ctrl	Aposymbiotic	1	2.71828	0	0	Inf	1	1
LP	Aposymbiotic	0.369989	1.44772	63.0011	0.320861	Inf	0.06761	2.02473
NP	Aposymbiotic	1.694	5.4412	-69.4	1.09449	Inf	0.477478	6.00999
Ctrl	Symbiotic	0.165854	1.1804	83.4146	0.185717	Inf	0.018475	1.48891
LP	Symbiotic	0.387311	1.47302	61.2689	0.336164	Inf	0.0706749	2.12254
NP	Symbiotic	0.165854	1.1804	83.4146	0.185717	Inf	0.018475	1.48891
contrast	SYMBIOTIC_STATUS	ratio	SE	df	null	z.ratio	p.value
Ctrl / LP	Aposymbiotic	2.70278	2.34391	Inf	1	1.14652	0.485418
Ctrl / NP	Aposymbiotic	0.590319	0.381404	Inf	1	-0.815808	0.693211
LP / NP	Aposymbiotic	0.218411	0.178876	Inf	1	-1.85763	0.151184
Ctrl / LP	Symbiotic	0.428219	0.524471	Inf	1	-0.692472	0.767893
Ctrl / NP	Symbiotic	1	1.41421	Inf	1	8.40046e-08	1
LP / NP	Symbiotic	2.33525	2.86015	Inf	1	0.692472	0.767893

## Sheet: 5-Metabolomics
MODEL SUMMARY: lmer(amino_acid ~ SYMBIOTIC_STATUS * DIET + (1 | COLONY_NAME), data = DM_MET_DAT)
AminoAcid	contrast	DIET	estimate	SE	df	t.ratio	p.value
L_Alanine	Symbiotic - Aposymbiotic	Control	0.190929	0.463187	27.5337	0.412207	0.683379
L_Alanine	Symbiotic - Aposymbiotic	Low Protein	-0.353869	0.397955	33.6738	-0.889219	0.380194
L_Arginine	Symbiotic - Aposymbiotic	Control	0.00642991	0.0927968	29.4678	0.0692902	0.945227
L_Arginine	Symbiotic - Aposymbiotic	Low Protein	0.0488936	0.0788361	33.2788	0.620193	0.539355
L_Asparagine	Symbiotic - Aposymbiotic	Control	0.00852161	0.0867921	8.30311	0.0981841	0.924115
L_Asparagine	Symbiotic - Aposymbiotic	Low Protein	-0.130533	0.0772988	35.3703	-1.68868	0.10008
L_Aspartic.Acid	Symbiotic - Aposymbiotic	Control	0.00562351	0.0316956	15.6351	0.177423	0.861455
L_Aspartic.Acid	Symbiotic - Aposymbiotic	Low Protein	0.0469028	0.0282043	34.678	1.66297	0.105333
L_Cysteine	Symbiotic - Aposymbiotic	Control	0.00496318	0.00377197	16.4232	1.3158	0.206312
L_Cysteine	Symbiotic - Aposymbiotic	Low Protein	0.00234064	0.00335255	34.6231	0.698165	0.489737
L_Cystine	Symbiotic - Aposymbiotic	Control	0.0044834	0.00423973	8.30311	1.05747	0.320089
L_Cystine	Symbiotic - Aposymbiotic	Low Protein	-0.000170747	0.00377598	35.3703	-0.0452192	0.964187
L_Glutamic.acid	Symbiotic - Aposymbiotic	Control	0.299754	0.292408	27.1498	1.02512	0.314353
L_Glutamic.acid	Symbiotic - Aposymbiotic	Low Protein	0.484381	0.251706	33.732	1.92439	0.0627747
L_Glutamine	Symbiotic - Aposymbiotic	Control	0.561489	0.442667	23.5097	1.26842	0.217064
L_Glutamine	Symbiotic - Aposymbiotic	Low Protein	0.323025	0.386684	34.1258	0.835371	0.40932
L_Glycine	Symbiotic - Aposymbiotic	Control	0.386179	0.365397	28.448	1.05688	0.299461
L_Glycine	Symbiotic - Aposymbiotic	Low Protein	0.0975265	0.312395	33.5125	0.31219	0.756831
L_Histidine	Symbiotic - Aposymbiotic	Control	0.0720583	0.0595139	8.35432	1.21078	0.259117
L_Histidine	Symbiotic - Aposymbiotic	Low Protein	0.00324774	0.0530089	35.3634	0.0612677	0.951491
L_Isoleucine	Symbiotic - Aposymbiotic	Control	0.0767252	0.0366524	8.30311	2.09332	0.0683975
L_Isoleucine	Symbiotic - Aposymbiotic	Low Protein	-0.0128904	0.0326434	35.3703	-0.394887	0.695298
L_Leucine	Symbiotic - Aposymbiotic	Control	0.224115	0.101178	29.7921	2.21504	0.0345495
L_Leucine	Symbiotic - Aposymbiotic	Low Protein	0.103811	0.0857633	33.1873	1.21044	0.23466
L_Lysine	Symbiotic - Aposymbiotic	Control	0.159399	0.1372	8.30311	1.1618	0.277622
L_Lysine	Symbiotic - Aposymbiotic	Low Protein	0.247937	0.122193	35.3703	2.02906	0.0500311
L_Methionine	Symbiotic - Aposymbiotic	Control	0.307364	0.288162	31.0117	1.06664	0.29437
L_Methionine	Symbiotic - Aposymbiotic	Low Protein	0.136875	0.241801	32.7158	0.566065	0.575212
L_Phenylalanine	Symbiotic - Aposymbiotic	Control	0.0622054	0.0376158	11.2621	1.6537	0.125764
L_Phenylalanine	Symbiotic - Aposymbiotic	Low Protein	0.0323292	0.0335807	35.034	0.962732	0.342281
L_Proline	Symbiotic - Aposymbiotic	Control	0.331151	0.337838	23.0951	0.980206	0.337142
L_Proline	Symbiotic - Aposymbiotic	Low Protein	0.0560441	0.295517	34.1598	0.189647	0.850708
L_Serine	Symbiotic - Aposymbiotic	Control	0.114967	0.135994	22.8123	0.84538	0.406679
L_Serine	Symbiotic - Aposymbiotic	Low Protein	0.217636	0.119066	34.1822	1.82786	0.0763106
L_Threonine	Symbiotic - Aposymbiotic	Control	0.100439	0.0662925	24.2151	1.51509	0.142694
L_Threonine	Symbiotic - Aposymbiotic	Low Protein	0.0695165	0.0577667	34.0645	1.2034	0.237118
L_Tryptophane	Symbiotic - Aposymbiotic	Control	0.21449	0.148326	25.097	1.44607	0.160532
L_Tryptophane	Symbiotic - Aposymbiotic	Low Protein	0.0918378	0.128824	33.98	0.712894	0.480779
L_Tyrosine	Symbiotic - Aposymbiotic	Control	2.10008	0.916219	25.4322	2.29211	0.0304373
L_Tyrosine	Symbiotic - Aposymbiotic	Low Protein	2.04884	0.794693	33.9451	2.57815	0.0144457
L_Valine	Symbiotic - Aposymbiotic	Control	0.0889445	0.116559	29.3463	0.763087	0.451502
L_Valine	Symbiotic - Aposymbiotic	Low Protein	-0.0746956	0.093034	31.9612	-0.802886	0.427971

## Sheet: 6-Symbiont-Density
MODEL SUMMARY: lm(LOG_RATIO ~ DIET, data = DM_DATA) (repeated for each week)
term	estimate	std.error	statistic	p.value	Time
(Intercept)	-0.718235	0.179414	-4.00323	0.000263337	Week 0
DietLow Protein	0.0757353	0.27891	0.27154	0.787372	Week 0
DietNo Protein	0.45895	0.266976	1.71906	0.093334	Week 0
(Intercept)	-0.194667	0.133121	-1.46232	0.151665	Week 6
DietLow Protein	-0.250958	0.185297	-1.35436	0.183418	Week 6
DietNo Protein	0.504667	0.204662	2.46585	0.0181723	Week 6
(Intercept)	-0.74	0.243007	-3.04518	0.00541568	Week 12
DietLow Protein	0.78	0.334962	2.32862	0.0282607	Week 12
DietNo Protein	1.16556	0.343664	3.39155	0.002315	Week 12
Model statistics for diet explanantory variable
Time	r.squared	adj.r.squared	sigma	statistic	p.value	df	logLik	AIC	BIC	deviance	df.residual	nobs
Week 0	0.0746887	0.0284231	0.739743	1.61435	0.211718	2	-46.497	100.994	108.039	21.8888	40	43
Week 6	0.265798	0.228147	0.515577	7.05945	0.00241771	2	-30.2155	68.4309	75.3816	10.367	39	42
Week 12	0.323833	0.26974	0.729022	5.98656	0.00751059	2	-29.2942	66.5885	71.9173	13.2868	25	28
