# Supplementary material for: Metabolic plasticity supports a flexible nutritional symbiosis in Cardiocondyla ants
Source: Research Square preprint supplement (doi:10.21203/rs.3.rs-7898267/v1), 2025-11-10
Supplement: Supplementary file 2 [file Table-S10-CuticleMeasurements.xlsx]

## Sheet: Table-S10-CuticleMeasurements
sample	ant volume(µm³)	cuticle volume(µm³)	cuticle proportion	mean(µm)	median(µm)	stdev(µm)	fill XYZ	colony_type	treatment
ct1	1.18495e+08	1.56555e+07	0.132119	9.6	9.74	2.02		Symbiotic	Control
ct2	9.8688e+07	1.2228e+07	0.123905	8.99	8.87	2.06		Symbiotic	Control
ct3-1	1.07136e+08	1.35551e+07	0.126523	9.12	9.09	2.06		Symbiotic	Low Protein
ct3-2	1.21394e+08	1.51909e+07	0.125137	9.63	9.48	2.16		Symbiotic	Low Protein
ct3-3	9.8162e+07	1.28174e+07	0.130574	9.58	9.78	2.2		Symbiotic	Low Protein
ct4	1.06147e+08	1.31735e+07	0.124107	8.98	8.82	1.75		Symbiotic	Low Protein
ct5-1	9.00157e+07	1.18082e+07	0.13118	8.95	8.92	1.77		Symbiotic	No Protein
ct5-2	9.16369e+07	1.07929e+07	0.117779	8.72	8.5	1.85		Symbiotic	No Protein
ct6	1.0451e+08	1.49623e+07	0.143167	9.67	9.94	1.93		Aposymbiotic	Control
ct7	1.04107e+08	1.03178e+07	0.0991076	8.28	8.48	1.18		Aposymbiotic	Control
ct8	1.15528e+08	1.40501e+07	0.121616	9.29	8.94	1.99		Aposymbiotic	Low Protein
ct9	9.68897e+07	1.29641e+07	0.133803	9.11	9.09	1.87		Aposymbiotic	Low Protein
ct10	8.4621e+07	1.00942e+07	0.119287	8.75	8.45	1.89		Aposymbiotic	No Protein
