# Supplementary material for: Metabolic plasticity supports a flexible nutritional symbiosis in Cardiocondyla ants
Source: Research Square preprint supplement (doi:10.21203/rs.3.rs-7898267/v1), 2025-11-10
Supplement: Supplementary file 3 [file Table-S2-Sample-Metadata.xlsx]

## Sheet: Table-S2-Sample-Metadata
Genus	Species	ColonyN	ColonyID	SampleID	Lifestage	Kit	Run	Replicate	Condition	Treatment
Cardiocondyla	obscurior	JP1	JP2011_1_31	JP2011_1_31_L	Larvae	SMARTer	Run2	1	Aposymbiotic	Larvae.Aposymbiotic
Cardiocondyla	obscurior	JP2	JP2011_2_31	JP2011_2_31_L	Larvae	TruSeq	Run1	2	Aposymbiotic	Larvae.Aposymbiotic
Cardiocondyla	obscurior	JP6	JP2011_6_31	JP2011_6_31_L	Larvae	TruSeq	Run1	3	Aposymbiotic	Larvae.Aposymbiotic
Cardiocondyla	obscurior	JP1	JP2011_1_31	JP2011_1_31_P	Pupae	TruSeq	Run1	1	Aposymbiotic	Pupae.Aposymbiotic
Cardiocondyla	obscurior	JP2	JP2011_2_31	JP2011_2_31_P	Pupae	SMARTer	Run2	2	Aposymbiotic	Pupae.Aposymbiotic
Cardiocondyla	obscurior	JP6	JP2011_6_31	JP2011_6_31_P	Pupae	SMARTer	Run2	3	Aposymbiotic	Pupae.Aposymbiotic
Cardiocondyla	obscurior	JP1	JP2011_1_31	JP2011_1_31_W	Worker	SMARTer	Run2	1	Aposymbiotic	Worker.Aposymbiotic
Cardiocondyla	obscurior	JP2	JP2011_2_31	JP2011_2_31_W	Worker	SMARTer	Run2	2	Aposymbiotic	Worker.Aposymbiotic
Cardiocondyla	obscurior	JP6	JP2011_6_31	JP2011_6_31_W	Worker	SMARTer	Run2	3	Aposymbiotic	Worker.Aposymbiotic
Cardiocondyla	obscurior	JP1	JP2011_1_31	JP2011_1_31_Q	Queen	SMARTer	Run2	1	Aposymbiotic	Queen.Aposymbiotic
Cardiocondyla	obscurior	JP2	JP2011_2_31	JP2011_2_31_Q	Queen	SMARTer	Run2	2	Aposymbiotic	Queen.Aposymbiotic
Cardiocondyla	obscurior	JP6	JP2011_6_31	JP2011_6_31_Q	Queen	SMARTer	Run2	3	Aposymbiotic	Queen.Aposymbiotic
Cardiocondyla	obscurior	JP1	JP2011_1_26	JP2011_1_26_L	Larvae	TruSeq	Run1	1	Symbiotic	Larvae.Symbiotic
Cardiocondyla	obscurior	JP2	JP2011_2_26	JP2011_2_26_L	Larvae	TruSeq	Run1	2	Symbiotic	Larvae.Symbiotic
Cardiocondyla	obscurior	JP6	JP2011_6_26	JP2011_6_26_L	Larvae	TruSeq	Run1	3	Symbiotic	Larvae.Symbiotic
Cardiocondyla	obscurior	JP1	JP2011_1_26	JP2011_1_26_P	Pupae	TruSeq	Run1	1	Symbiotic	Pupae.Symbiotic
Cardiocondyla	obscurior	JP2	JP2011_2_26	JP2011_2_26_P	Pupae	TruSeq	Run1	2	Symbiotic	Pupae.Symbiotic
Cardiocondyla	obscurior	JP6	JP2011_6_26	JP2011_6_26_P	Pupae	TruSeq	Run2	3	Symbiotic	Pupae.Symbiotic
Cardiocondyla	obscurior	JP1	JP2011_1_26	JP2011_1_26_W	Worker	TruSeq	Run1	1	Symbiotic	Worker.Symbiotic
Cardiocondyla	obscurior	JP2	JP2011_2_26	JP2011_2_26_W	Worker	TruSeq	Run1	2	Symbiotic	Worker.Symbiotic
Cardiocondyla	obscurior	JP6	JP2011_6_26	JP2011_6_26_W	Worker	SMARTer	Run2	3	Symbiotic	Worker.Symbiotic
Cardiocondyla	obscurior	JP1	JP2011_1_26	JP2011_1_26_Q	Queen	SMARTer	Run2	1	Symbiotic	Queen.Symbiotic
Cardiocondyla	obscurior	JP2	JP2011_2_26	JP2011_2_26_Q	Queen	TruSeq	Run1	2	Symbiotic	Queen.Symbiotic
Cardiocondyla	obscurior	JP6	JP2011_6_26	JP2011_6_26_Q	Queen	TruSeq	Run2	3	Symbiotic	Queen.Symbiotic
