# Supplementary material for: Metabolic plasticity supports a flexible nutritional symbiosis in Cardiocondyla ants
Source: Research Square preprint supplement (doi:10.21203/rs.3.rs-7898267/v1), 2025-11-10
Supplement: Supplementary file 4 [file Table-S3-DESeq2-DEGS-ComparisonsAnnotated.xlsx]

## Sheet: 1-Larvae
	target_id	baseMean	log2FoldChange	lfcSE	stat	pvalue	padj	DEG	interpro_id	domain_description	GO_id	PANTHER	description_PANTHER	KO	desciption_KEGG
1	COBS00502	11.8688	0.783227	1.13753	6.4712	9.72e-11	2.72e-08	UP	IPR027901	Protein of unknown function DUF4541	-	NA	NA	NA	NA
4	COBS00712	3.40619	1.02968	1.1757	4.70892	2.49e-06	0.000347891	UP	-	-		NA	NA	NA	NA
5	COBS00796	2063.48	1.51334	0.364563	4.79392	1.64e-06	0.000234767	UP	IPR017850	Alkaline-phosphatase-like, core domain superfamily	-	NA	NA	NA	NA
6	COBS00796	2063.48	1.51334	0.364563	4.79392	1.64e-06	0.000234767	UP	IPR004245	Protein of unknown function DUF229	-	PTHR10974	UNCHARACTERIZED	NA	NA
7	COBS00796	2063.48	1.51334	0.364563	4.79392	1.64e-06	0.000234767	UP	-	-		PTHR10974:SF9	FI02830P-RELATED	NA	NA
12	COBS00901	1312.96	0.871519	0.177793	5.29409	1.2e-07	1.99e-05	UP	IPR041723	CTP:phosphocholine cytidylyltransferase domain	-	NA	NA	K00968	choline-phosphate cytidylyltransferase [EC:2.7.7.15]
13	COBS00901	1312.96	0.871519	0.177793	5.29409	1.2e-07	1.99e-05	UP	-	-		PTHR10739:SF20	CHOLINE-PHOSPHATE CYTIDYLYLTRANSFERASE B	K00968	choline-phosphate cytidylyltransferase [EC:2.7.7.15]
14	COBS00901	1312.96	0.871519	0.177793	5.29409	1.2e-07	1.99e-05	UP	IPR004821	Cytidyltransferase-like domain	GO:0003824|GO:0009058	NA	NA	K00968	choline-phosphate cytidylyltransferase [EC:2.7.7.15]
16	COBS00901	1312.96	0.871519	0.177793	5.29409	1.2e-07	1.99e-05	UP	IPR045049	Choline-phosphate cytidylyltransferase Pcy1-like	GO:0004105|GO:0006657	PTHR10739	CYTIDYLYLTRANSFERASE	K00968	choline-phosphate cytidylyltransferase [EC:2.7.7.15]
17	COBS00901	1312.96	0.871519	0.177793	5.29409	1.2e-07	1.99e-05	UP	IPR014729	Rossmann-like alpha/beta/alpha sandwich fold	-	NA	NA	K00968	choline-phosphate cytidylyltransferase [EC:2.7.7.15]
27	COBS01120	2873.39	1.08429	0.328124	3.54057	0.000399256	0.0353981	UP	-	-		PTHR12669:SF12,PTHR12669	4E-BINDING PROTEIN THOR,EUKARYOTIC TRANSLATION INITIATION FACTOR 4E-BINDING PROTEIN	NA	NA
28	COBS01120	2873.39	1.08429	0.328124	3.54057	0.000399256	0.0353981	UP	IPR008606	Eukaryotic translation initiation factor 4E binding	GO:0008190|GO:0045947	NA	NA	NA	NA
48	COBS01720	40956.3	2.191	0.541789	3.9733	7.09e-05	0.00786563	UP	IPR017853	Glycoside hydrolase superfamily	-	NA	NA	K24727	myogenesis-regulating glycosidase [EC:3.2.1.-]
49	COBS01720	40956.3	2.191	0.541789	3.9733	7.09e-05	0.00786563	UP	IPR000322	Glycoside hydrolase family 31	GO:0004553|GO:0005975	NA	NA	K24727	myogenesis-regulating glycosidase [EC:3.2.1.-]
51	COBS01720	40956.3	2.191	0.541789	3.9733	7.09e-05	0.00786563	UP	IPR013780	Glycosyl hydrolase, all-beta	-	NA	NA	K24727	myogenesis-regulating glycosidase [EC:3.2.1.-]
53	COBS01720	40956.3	2.191	0.541789	3.9733	7.09e-05	0.00786563	UP	-	-		PTHR43053:SF4,PTHR43053	MYOGENESIS-REGULATING GLYCOSIDASE,GLYCOSIDASE FAMILY 31	K24727	myogenesis-regulating glycosidase [EC:3.2.1.-]
59	COBS01720	40956.3	2.191	0.541789	3.9733	7.09e-05	0.00786563	UP	-	-		PTHR43053,PTHR43053:SF4	GLYCOSIDASE FAMILY 31,MYOGENESIS-REGULATING GLYCOSIDASE	K24727	myogenesis-regulating glycosidase [EC:3.2.1.-]
84	COBS02344	800.628	0.914855	0.277976	3.52282	0.000426977	0.0373211	UP	IPR042410	Transducin beta-like protein 2	-	PTHR44321	TRANSDUCIN BETA-LIKE PROTEIN 2	NA	NA
85	COBS02344	800.628	0.914855	0.277976	3.52282	0.000426977	0.0373211	UP	IPR015943	WD40/YVTN repeat-like-containing domain superfamily	GO:0005515	NA	NA	NA	NA
86	COBS02344	800.628	0.914855	0.277976	3.52282	0.000426977	0.0373211	UP	IPR036322	WD40-repeat-containing domain superfamily	GO:0005515	NA	NA	K23325	transducin beta-like protein 2
87	COBS02344	800.628	0.914855	0.277976	3.52282	0.000426977	0.0373211	UP	IPR042410	Transducin beta-like protein 2	-	PTHR44321	TRANSDUCIN BETA-LIKE PROTEIN 2	K23325	transducin beta-like protein 2
88	COBS02344	800.628	0.914855	0.277976	3.52282	0.000426977	0.0373211	UP	IPR036322	WD40-repeat-containing domain superfamily	GO:0005515	NA	NA	NA	NA
89	COBS02344	800.628	0.914855	0.277976	3.52282	0.000426977	0.0373211	UP	-	-		NA	NA	K23325	transducin beta-like protein 2
91	COBS02344	800.628	0.914855	0.277976	3.52282	0.000426977	0.0373211	UP	IPR015943	WD40/YVTN repeat-like-containing domain superfamily	GO:0005515	NA	NA	K23325	transducin beta-like protein 2
93	COBS02344	800.628	0.914855	0.277976	3.52282	0.000426977	0.0373211	UP	IPR001680	WD40 repeat	GO:0005515	NA	NA	K23325	transducin beta-like protein 2
97	COBS02344	800.628	0.914855	0.277976	3.52282	0.000426977	0.0373211	UP	-	-		NA	NA	NA	NA
98	COBS02373	5759.44	0.605792	0.174614	3.68889	0.000225235	0.0216198	UP	IPR005225	Small GTP-binding protein domain	GO:0005525	NA	NA	K07856	Ras homolog gene family, member B
99	COBS02373	5759.44	0.605792	0.174614	3.68889	0.000225235	0.0216198	UP	IPR005225	Small GTP-binding protein domain	GO:0005525	NA	NA	K04513	Ras homolog gene family, member A
100	COBS02373	5759.44	0.605792	0.174614	3.68889	0.000225235	0.0216198	UP	IPR001806	Small GTPase	GO:0003924|GO:0005525	NA	NA	K04513	Ras homolog gene family, member A
102	COBS02373	5759.44	0.605792	0.174614	3.68889	0.000225235	0.0216198	UP	IPR001806	Small GTPase	GO:0003924|GO:0005525	NA	NA	K07975	Rho family, other
103	COBS02373	5759.44	0.605792	0.174614	3.68889	0.000225235	0.0216198	UP	IPR005225	Small GTP-binding protein domain	GO:0005525	NA	NA	K07975	Rho family, other
104	COBS02373	5759.44	0.605792	0.174614	3.68889	0.000225235	0.0216198	UP	IPR003578	Small GTPase Rho	GO:0005525|GO:0007264	PTHR24072	RHO FAMILY GTPASE	K04513	Ras homolog gene family, member A
105	COBS02373	5759.44	0.605792	0.174614	3.68889	0.000225235	0.0216198	UP	IPR027417	P-loop containing nucleoside triphosphate hydrolase	-	NA	NA	K07975	Rho family, other
106	COBS02373	5759.44	0.605792	0.174614	3.68889	0.000225235	0.0216198	UP	-	-		PTHR24072:SF100	RHO-RELATED GTP-BINDING PROTEIN RHOC	K07856	Ras homolog gene family, member B
108	COBS02373	5759.44	0.605792	0.174614	3.68889	0.000225235	0.0216198	UP	IPR001806	Small GTPase	GO:0003924|GO:0005525	NA	NA	K07856	Ras homolog gene family, member B
109	COBS02373	5759.44	0.605792	0.174614	3.68889	0.000225235	0.0216198	UP	IPR027417	P-loop containing nucleoside triphosphate hydrolase	-	NA	NA	K04513	Ras homolog gene family, member A
111	COBS02373	5759.44	0.605792	0.174614	3.68889	0.000225235	0.0216198	UP	IPR027417	P-loop containing nucleoside triphosphate hydrolase	-	NA	NA	K07856	Ras homolog gene family, member B
114	COBS02373	5759.44	0.605792	0.174614	3.68889	0.000225235	0.0216198	UP	IPR003578	Small GTPase Rho	GO:0005525|GO:0007264	PTHR24072	RHO FAMILY GTPASE	K07975	Rho family, other
115	COBS02373	5759.44	0.605792	0.174614	3.68889	0.000225235	0.0216198	UP	-	-		PTHR24072:SF100	RHO-RELATED GTP-BINDING PROTEIN RHOC	K04513	Ras homolog gene family, member A
120	COBS02373	5759.44	0.605792	0.174614	3.68889	0.000225235	0.0216198	UP	-	-		PTHR24072:SF100	RHO-RELATED GTP-BINDING PROTEIN RHOC	K07975	Rho family, other
124	COBS02373	5759.44	0.605792	0.174614	3.68889	0.000225235	0.0216198	UP	IPR003578	Small GTPase Rho	GO:0005525|GO:0007264	PTHR24072	RHO FAMILY GTPASE	K07856	Ras homolog gene family, member B
138	COBS02565	18.2221	1.07336	1.13062	10.4259	1.89e-25	2.11e-22	UP	IPR029058	Alpha/Beta hydrolase fold	-	NA	NA	NA	NA
139	COBS02565	18.2221	1.07336	1.13062	10.4259	1.89e-25	2.11e-22	UP	IPR013818	Lipase	GO:0016298	NA	NA	NA	NA
140	COBS02565	18.2221	1.07336	1.13062	10.4259	1.89e-25	2.11e-22	UP	-	-		PTHR11610:SF164	GH15759P-RELATED	NA	NA
143	COBS02565	18.2221	1.07336	1.13062	10.4259	1.89e-25	2.11e-22	UP	IPR000734	Triacylglycerol lipase family	GO:0016298	PTHR11610	LIPASE	NA	NA
151	COBS02578	1.34504	0.689774	0.968823	3.66691	0.000245501	0.0231392	UP	-	-		NA	NA	NA	NA
159	COBS04103	7.73012	0.431056	1.15993	8.50973	1.74e-17	9.09e-15	UP	-	-		NA	NA	NA	NA
165	COBS04578	51.945	0.995275	1.16543	7.39494	1.41e-13	5.82e-11	UP	-	-		NA	NA	NA	NA
166	COBS04983	6.00714	1.18878	1.18197	4.50699	6.58e-06	0.000894593	UP	-	-		NA	NA	NA	NA
168	COBS05258	43.0253	0.834038	1.16212	8.29045	1.13e-16	5.35e-14	UP	-	-		NA	NA	NA	NA
171	COBS05361	4265.11	0.832428	0.22274	4.22675	2.37e-05	0.00289811	UP	IPR025304	ALIX V-shaped domain	GO:0005515	NA	NA	K12200	programmed cell death 6-interacting protein
172	COBS05361	4265.11	0.832428	0.22274	4.22675	2.37e-05	0.00289811	UP	IPR045251	Vacuolar protein-sorting protein Bro1-like	GO:0071985	PTHR23030	PCD6 INTERACTING PROTEIN-RELATED	K12200	programmed cell death 6-interacting protein
173	COBS05361	4265.11	0.832428	0.22274	4.22675	2.37e-05	0.00289811	UP	-	-		NA	NA	K12200	programmed cell death 6-interacting protein
174	COBS05361	4265.11	0.832428	0.22274	4.22675	2.37e-05	0.00289811	UP	IPR004328	BRO1 domain	-	NA	NA	K12200	programmed cell death 6-interacting protein
175	COBS05361	4265.11	0.832428	0.22274	4.22675	2.37e-05	0.00289811	UP	-	-		PTHR23030:SF30	PROGRAMMED CELL DEATH 6-INTERACTING PROTEIN	K12200	programmed cell death 6-interacting protein
176	COBS05361	4265.11	0.832428	0.22274	4.22675	2.37e-05	0.00289811	UP	IPR038499	BRO1 domain superfamily	-	NA	NA	K12200	programmed cell death 6-interacting protein
181	COBS05546	5.74145	1.17077	1.18554	5.91374	3.34e-09	7.58e-07	UP	IPR004117	Olfactory receptor, insect	GO:0004984|GO:0005549|GO:0007608|GO:0016020	PTHR21137	ODORANT RECEPTOR	K22984	odorant receptor
190	COBS05741	2956.48	1.2816	0.40177	3.57269	0.000353339	0.0319557	UP	IPR006629	LPS-induced tumour necrosis factor alpha factor	-	NA	NA	K19363	lipopolysaccharide-induced tumor necrosis factor-alpha factor
192	COBS05741	2956.48	1.2816	0.40177	3.57269	0.000353339	0.0319557	UP	-	-		PTHR23292:SF14	FI16615P1-RELATED	K19363	lipopolysaccharide-induced tumor necrosis factor-alpha factor
194	COBS05741	2956.48	1.2816	0.40177	3.57269	0.000353339	0.0319557	UP	IPR037519	LITAF domain containing protein	-	PTHR23292	LIPOPOLYSACCHARIDE-INDUCED TUMOR NECROSIS FACTOR-ALPHA FACTOR	K19363	lipopolysaccharide-induced tumor necrosis factor-alpha factor
196	COBS05837	970.312	3.66598	0.882693	4.28966	1.79e-05	0.00225793	UP	IPR025110	AMP-binding enzyme, C-terminal domain	-	NA	NA	NA	NA
197	COBS05837	970.312	3.66598	0.882693	4.28966	1.79e-05	0.00225793	UP	IPR045851	AMP-binding enzyme, C-terminal domain superfamily	-	NA	NA	NA	NA
198	COBS05837	970.312	3.66598	0.882693	4.28966	1.79e-05	0.00225793	UP	IPR020845	AMP-binding, conserved site	-	NA	NA	NA	NA
199	COBS05837	970.312	3.66598	0.882693	4.28966	1.79e-05	0.00225793	UP	-	-		PTHR43201:SF9,PTHR43201	ACYL-COA SYNTHETASE FAMILY MEMBER 2, MITOCHONDRIAL,ACYL-COA SYNTHETASE	NA	NA
200	COBS05837	970.312	3.66598	0.882693	4.28966	1.79e-05	0.00225793	UP	IPR000873	AMP-dependent synthetase/ligase	-	NA	NA	NA	NA
201	COBS05837	970.312	3.66598	0.882693	4.28966	1.79e-05	0.00225793	UP	IPR042099	ANL, N-terminal domain	-	NA	NA	NA	NA
203	COBS07138	4.21892	0.286235	1.17582	6.4918	8.48e-11	2.41e-08	UP	-	-		NA	NA	NA	NA
204	COBS07216	1647.79	1.01302	0.306214	3.90937	9.25e-05	0.00998507	UP	IPR001805	Adenosine kinase	GO:0004001|GO:0006166	PTHR45769	-	K00856	adenosine kinase [EC:2.7.1.20]
205	COBS07216	1647.79	1.01302	0.306214	3.90937	9.25e-05	0.00998507	UP	IPR002173	Carbohydrate/purine kinase, PfkB, conserved site	GO:0016773	NA	NA	K00856	adenosine kinase [EC:2.7.1.20]
208	COBS07216	1647.79	1.01302	0.306214	3.90937	9.25e-05	0.00998507	UP	-	-		NA	NA	K00856	adenosine kinase [EC:2.7.1.20]
209	COBS07216	1647.79	1.01302	0.306214	3.90937	9.25e-05	0.00998507	UP	IPR029056	Ribokinase-like	-	NA	NA	K00856	adenosine kinase [EC:2.7.1.20]
210	COBS07216	1647.79	1.01302	0.306214	3.90937	9.25e-05	0.00998507	UP	IPR011611	Carbohydrate kinase PfkB	-	NA	NA	K00856	adenosine kinase [EC:2.7.1.20]
219	COBS07263	2248.9	0.400361	1.08011	5.89677	3.71e-09	8.17e-07	UP	IPR002048	EF-hand domain	GO:0005509	NA	NA	NA	NA
220	COBS07263	2248.9	0.400361	1.08011	5.89677	3.71e-09	8.17e-07	UP	IPR011992	EF-hand domain pair	-	NA	NA	NA	NA
221	COBS07263	2248.9	0.400361	1.08011	5.89677	3.71e-09	8.17e-07	UP	-	-		PTHR23050:SF244,PTHR23050	TROPONIN C, ISOFORM 2-RELATED,CALCIUM BINDING PROTEIN	NA	NA
222	COBS07263	2248.9	0.400361	1.08011	5.89677	3.71e-09	8.17e-07	UP	IPR018247	EF-Hand 1, calcium-binding site	-	NA	NA	NA	NA
232	COBS08657	1.44254	0.378972	1.07222	4.33915	1.43e-05	0.00186491	UP	-	-		NA	NA	NA	NA
235	COBS09740	1991.57	0.681091	0.214468	3.57774	0.000346572	0.031526	UP	-	-		PTHR11102,PTHR11102:SF70	SEL-1-LIKE PROTEIN,PROTEIN SEL-1 HOMOLOG 1	K07126	uncharacterized protein
236	COBS09740	1991.57	0.681091	0.214468	3.57774	0.000346572	0.031526	UP	IPR011990	Tetratricopeptide-like helical domain superfamily	GO:0005515	NA	NA	K14026	SEL1 protein
237	COBS09740	1991.57	0.681091	0.214468	3.57774	0.000346572	0.031526	UP	IPR011990	Tetratricopeptide-like helical domain superfamily	GO:0005515	NA	NA	K07126	uncharacterized protein
238	COBS09740	1991.57	0.681091	0.214468	3.57774	0.000346572	0.031526	UP	-	-		PTHR11102,PTHR11102:SF70	SEL-1-LIKE PROTEIN,PROTEIN SEL-1 HOMOLOG 1	K14026	SEL1 protein
239	COBS09740	1991.57	0.681091	0.214468	3.57774	0.000346572	0.031526	UP	IPR006597	Sel1-like repeat	-	NA	NA	K07126	uncharacterized protein
240	COBS09740	1991.57	0.681091	0.214468	3.57774	0.000346572	0.031526	UP	IPR006597	Sel1-like repeat	-	NA	NA	K14026	SEL1 protein
242	COBS10224	6.087	0.785821	1.17761	4.44494	8.79e-06	0.00117568	UP	IPR004117	Olfactory receptor, insect	GO:0004984|GO:0005549|GO:0007608|GO:0016020	PTHR21137	ODORANT RECEPTOR	K22984	odorant receptor
253	COBS10846	2444.4	2.05335	0.439117	5.2539	1.49e-07	2.43e-05	UP	-	-		PTHR11686:SF51	GAMMA-GLUTAMYL TRANSPEPTIDASE, ISOFORM A	K18592	gamma-glutamyltranspeptidase / glutathione hydrolase / leukotriene-C4 hydrolase [EC:2.3.2.2 3.4.19.13 3.4.19.14]
254	COBS10846	2444.4	2.05335	0.439117	5.2539	1.49e-07	2.43e-05	UP	IPR000101	Gamma-glutamyltranspeptidase	GO:0006751|GO:0036374	PTHR11686	GAMMA GLUTAMYL TRANSPEPTIDASE	K18592	gamma-glutamyltranspeptidase / glutathione hydrolase / leukotriene-C4 hydrolase [EC:2.3.2.2 3.4.19.13 3.4.19.14]
256	COBS10846	2444.4	2.05335	0.439117	5.2539	1.49e-07	2.43e-05	UP	IPR043138	Gamma-glutamyltranspeptidase, large subunit, C-terminal domain	-	NA	NA	K18592	gamma-glutamyltranspeptidase / glutathione hydrolase / leukotriene-C4 hydrolase [EC:2.3.2.2 3.4.19.13 3.4.19.14]
257	COBS10846	2444.4	2.05335	0.439117	5.2539	1.49e-07	2.43e-05	UP	IPR043137	Gamma-glutamyltranspeptidase, small subunit	-	NA	NA	K18592	gamma-glutamyltranspeptidase / glutathione hydrolase / leukotriene-C4 hydrolase [EC:2.3.2.2 3.4.19.13 3.4.19.14]
258	COBS10846	2444.4	2.05335	0.439117	5.2539	1.49e-07	2.43e-05	UP	IPR029055	Nucleophile aminohydrolases, N-terminal	-	NA	NA	K18592	gamma-glutamyltranspeptidase / glutathione hydrolase / leukotriene-C4 hydrolase [EC:2.3.2.2 3.4.19.13 3.4.19.14]
264	COBS11124	12.4588	1.01	1.12789	10.5651	4.33e-26	5.21e-23	UP	-	-		NA	NA	NA	NA
265	COBS11557	1690.6	1.38718	0.467071	3.56813	0.000359536	0.0323293	UP	-	-		PTHR24292	CYTOCHROME P450	K24554	protein KIAA0825
266	COBS11557	1690.6	1.38718	0.467071	3.56813	0.000359536	0.0323293	UP	-	-		PTHR24292	CYTOCHROME P450	K15003	cytochrome P450 family 9 [EC:1.14.-.-]
267	COBS11557	1690.6	1.38718	0.467071	3.56813	0.000359536	0.0323293	UP	IPR001128	Cytochrome P450	GO:0004497|GO:0005506|GO:0016705|GO:0020037	NA	NA	K15003	cytochrome P450 family 9 [EC:1.14.-.-]
268	COBS11557	1690.6	1.38718	0.467071	3.56813	0.000359536	0.0323293	UP	IPR017972	Cytochrome P450, conserved site	GO:0005506|GO:0016705	NA	NA	K15003	cytochrome P450 family 9 [EC:1.14.-.-]
269	COBS11557	1690.6	1.38718	0.467071	3.56813	0.000359536	0.0323293	UP	IPR002401	Cytochrome P450, E-class, group I	GO:0004497|GO:0005506|GO:0016705|GO:0020037	NA	NA	K15003	cytochrome P450 family 9 [EC:1.14.-.-]
270	COBS11557	1690.6	1.38718	0.467071	3.56813	0.000359536	0.0323293	UP	IPR036396	Cytochrome P450 superfamily	GO:0004497|GO:0005506|GO:0016705|GO:0020037	NA	NA	K24554	protein KIAA0825
271	COBS11557	1690.6	1.38718	0.467071	3.56813	0.000359536	0.0323293	UP	IPR001128	Cytochrome P450	GO:0004497|GO:0005506|GO:0016705|GO:0020037	NA	NA	K24554	protein KIAA0825
272	COBS11557	1690.6	1.38718	0.467071	3.56813	0.000359536	0.0323293	UP	IPR036396	Cytochrome P450 superfamily	GO:0004497|GO:0005506|GO:0016705|GO:0020037	NA	NA	K15003	cytochrome P450 family 9 [EC:1.14.-.-]
273	COBS11557	1690.6	1.38718	0.467071	3.56813	0.000359536	0.0323293	UP	IPR002401	Cytochrome P450, E-class, group I	GO:0004497|GO:0005506|GO:0016705|GO:0020037	NA	NA	K24554	protein KIAA0825
274	COBS11557	1690.6	1.38718	0.467071	3.56813	0.000359536	0.0323293	UP	IPR017972	Cytochrome P450, conserved site	GO:0005506|GO:0016705	NA	NA	K24554	protein KIAA0825
277	COBS11740	1933.63	1.38654	0.511167	3.47702	0.000507014	0.0438273	UP	-	-		PTHR10974:SF1	FI21235P1	NA	NA
278	COBS11740	1933.63	1.38654	0.511167	3.47702	0.000507014	0.0438273	UP	IPR017850	Alkaline-phosphatase-like, core domain superfamily	-	NA	NA	NA	NA
279	COBS11740	1933.63	1.38654	0.511167	3.47702	0.000507014	0.0438273	UP	IPR004245	Protein of unknown function DUF229	-	PTHR10974	UNCHARACTERIZED	NA	NA
280	COBS11910	667.822	1.46188	0.385087	3.95245	7.74e-05	0.00852326	UP	-	-		PTHR42858	AMINOTRANSFERASE	NA	K00832
281	COBS11910	667.822	1.46188	0.385087	3.95245	7.74e-05	0.00852326	UP	IPR015422	Pyridoxal phosphate-dependent transferase, small domain	GO:0003824	NA	NA	NA	K00832
282	COBS11910	667.822	1.46188	0.385087	3.95245	7.74e-05	0.00852326	UP	IPR015424	Pyridoxal phosphate-dependent transferase	-	NA	NA	NA	K00832
283	COBS11910	667.822	1.46188	0.385087	3.95245	7.74e-05	0.00852326	UP	IPR004839	Aminotransferase, class I/classII	GO:0009058|GO:0030170	NA	NA	NA	K00832
284	COBS11910	667.822	1.46188	0.385087	3.95245	7.74e-05	0.00852326	UP	IPR015421	Pyridoxal phosphate-dependent transferase, major domain	GO:0003824	NA	NA	NA	K00832
285	COBS12076	1181.13	1.60703	0.425011	4.04709	5.19e-05	0.0059224	UP	IPR039121	Acyl-coenzyme A diphosphatase NUDT19	GO:0016787	PTHR12318	TESTOSTERONE-REGULATED PROTEIN RP2	K13355	nucleoside diphosphate-linked moiety X motif 19, mitochondrial [EC:3.6.1.-]
287	COBS12076	1181.13	1.60703	0.425011	4.04709	5.19e-05	0.0059224	UP	IPR015797	NUDIX hydrolase-like domain superfamily	-	NA	NA	K13355	nucleoside diphosphate-linked moiety X motif 19, mitochondrial [EC:3.6.1.-]
288	COBS12076	1181.13	1.60703	0.425011	4.04709	5.19e-05	0.0059224	UP	-	-		NA	NA	K13355	nucleoside diphosphate-linked moiety X motif 19, mitochondrial [EC:3.6.1.-]
292	COBS12642	2259.08	1.05984	0.345489	3.64886	0.000263402	0.0245308	UP	IPR017441	Protein kinase, ATP binding site	GO:0005524	NA	NA	K05033	ATP-binding cassette subfamily C (CFTR/MRP) member 9
293	COBS12642	2259.08	1.05984	0.345489	3.64886	0.000263402	0.0245308	UP	IPR035014	cGMP-dependent protein kinase, catalytic domain	GO:0004692	NA	NA	K05033	ATP-binding cassette subfamily C (CFTR/MRP) member 9
294	COBS12642	2259.08	1.05984	0.345489	3.64886	0.000263402	0.0245308	UP	IPR003439	ABC transporter-like, ATP-binding domain	GO:0005524	NA	NA	K05033	ATP-binding cassette subfamily C (CFTR/MRP) member 9
295	COBS12642	2259.08	1.05984	0.345489	3.64886	0.000263402	0.0245308	UP	IPR002374	cGMP-dependent kinase	GO:0004692|GO:0005524	NA	NA	NA	NA
296	COBS12642	2259.08	1.05984	0.345489	3.64886	0.000263402	0.0245308	UP	IPR003439	ABC transporter-like, ATP-binding domain	GO:0005524	NA	NA	NA	NA
297	COBS12642	2259.08	1.05984	0.345489	3.64886	0.000263402	0.0245308	UP	IPR003593	AAA+ ATPase domain	-	NA	NA	NA	NA
298	COBS12642	2259.08	1.05984	0.345489	3.64886	0.000263402	0.0245308	UP	IPR027417	P-loop containing nucleoside triphosphate hydrolase	-	NA	NA	NA	NA
301	COBS12642	2259.08	1.05984	0.345489	3.64886	0.000263402	0.0245308	UP	IPR035014	cGMP-dependent protein kinase, catalytic domain	GO:0004692	NA	NA	NA	NA
302	COBS12642	2259.08	1.05984	0.345489	3.64886	0.000263402	0.0245308	UP	IPR017871	ABC transporter-like, conserved site	GO:0005524	NA	NA	NA	NA
303	COBS12642	2259.08	1.05984	0.345489	3.64886	0.000263402	0.0245308	UP	IPR000719	Protein kinase domain	GO:0004672|GO:0005524|GO:0006468	NA	NA	NA	NA
304	COBS12642	2259.08	1.05984	0.345489	3.64886	0.000263402	0.0245308	UP	IPR018490	Cyclic nucleotide-binding domain superfamily	-	NA	NA	NA	NA
305	COBS12642	2259.08	1.05984	0.345489	3.64886	0.000263402	0.0245308	UP	IPR036640	ABC transporter type 1, transmembrane domain superfamily	GO:0005524|GO:0016021	NA	NA	NA	NA
306	COBS12642	2259.08	1.05984	0.345489	3.64886	0.000263402	0.0245308	UP	IPR008271	Serine/threonine-protein kinase, active site	GO:0004672|GO:0006468	NA	NA	NA	NA
307	COBS12642	2259.08	1.05984	0.345489	3.64886	0.000263402	0.0245308	UP	IPR017441	Protein kinase, ATP binding site	GO:0005524	NA	NA	NA	NA
308	COBS12642	2259.08	1.05984	0.345489	3.64886	0.000263402	0.0245308	UP	IPR018490	Cyclic nucleotide-binding domain superfamily	-	NA	NA	K05033	ATP-binding cassette subfamily C (CFTR/MRP) member 9
309	COBS12642	2259.08	1.05984	0.345489	3.64886	0.000263402	0.0245308	UP	IPR011009	Protein kinase-like domain superfamily	-	NA	NA	NA	NA
311	COBS12642	2259.08	1.05984	0.345489	3.64886	0.000263402	0.0245308	UP	IPR017871	ABC transporter-like, conserved site	GO:0005524	NA	NA	K05033	ATP-binding cassette subfamily C (CFTR/MRP) member 9
312	COBS12642	2259.08	1.05984	0.345489	3.64886	0.000263402	0.0245308	UP	IPR000961	AGC-kinase, C-terminal	GO:0004674|GO:0005524|GO:0006468	NA	NA	NA	NA
314	COBS12642	2259.08	1.05984	0.345489	3.64886	0.000263402	0.0245308	UP	IPR014710	RmlC-like jelly roll fold	-	NA	NA	NA	NA
316	COBS12642	2259.08	1.05984	0.345489	3.64886	0.000263402	0.0245308	UP	-	-		PTHR24353,PTHR24353:SF58	CYCLIC NUCLEOTIDE-DEPENDENT PROTEIN KINASE,LP05330P	NA	NA
317	COBS12642	2259.08	1.05984	0.345489	3.64886	0.000263402	0.0245308	UP	IPR000595	Cyclic nucleotide-binding domain	-	NA	NA	NA	NA
318	COBS12642	2259.08	1.05984	0.345489	3.64886	0.000263402	0.0245308	UP	IPR011527	ABC transporter type 1, transmembrane domain	GO:0005524|GO:0016021|GO:0055085|GO:0140359	NA	NA	NA	NA
320	COBS12642	2259.08	1.05984	0.345489	3.64886	0.000263402	0.0245308	UP	IPR011527	ABC transporter type 1, transmembrane domain	GO:0005524|GO:0016021|GO:0055085|GO:0140359	NA	NA	K05033	ATP-binding cassette subfamily C (CFTR/MRP) member 9
322	COBS12642	2259.08	1.05984	0.345489	3.64886	0.000263402	0.0245308	UP	IPR027417	P-loop containing nucleoside triphosphate hydrolase	-	NA	NA	K05033	ATP-binding cassette subfamily C (CFTR/MRP) member 9
323	COBS12642	2259.08	1.05984	0.345489	3.64886	0.000263402	0.0245308	UP	IPR003593	AAA+ ATPase domain	-	NA	NA	K05033	ATP-binding cassette subfamily C (CFTR/MRP) member 9
327	COBS12642	2259.08	1.05984	0.345489	3.64886	0.000263402	0.0245308	UP	-	-		PTHR24223,PTHR24223:SF346	ATP-BINDING CASSETTE SUB-FAMILY C,ATP-BINDING CASSETTE SUB-FAMILY C MEMBER SUR	K05033	ATP-binding cassette subfamily C (CFTR/MRP) member 9
328	COBS12642	2259.08	1.05984	0.345489	3.64886	0.000263402	0.0245308	UP	IPR000595	Cyclic nucleotide-binding domain	-	NA	NA	K05033	ATP-binding cassette subfamily C (CFTR/MRP) member 9
332	COBS12642	2259.08	1.05984	0.345489	3.64886	0.000263402	0.0245308	UP	IPR000961	AGC-kinase, C-terminal	GO:0004674|GO:0005524|GO:0006468	NA	NA	K05033	ATP-binding cassette subfamily C (CFTR/MRP) member 9
335	COBS12642	2259.08	1.05984	0.345489	3.64886	0.000263402	0.0245308	UP	-	-		PTHR24223,PTHR24223:SF346	ATP-BINDING CASSETTE SUB-FAMILY C,ATP-BINDING CASSETTE SUB-FAMILY C MEMBER SUR	NA	NA
336	COBS12642	2259.08	1.05984	0.345489	3.64886	0.000263402	0.0245308	UP	IPR014710	RmlC-like jelly roll fold	-	NA	NA	K05033	ATP-binding cassette subfamily C (CFTR/MRP) member 9
338	COBS12642	2259.08	1.05984	0.345489	3.64886	0.000263402	0.0245308	UP	IPR011009	Protein kinase-like domain superfamily	-	NA	NA	K05033	ATP-binding cassette subfamily C (CFTR/MRP) member 9
341	COBS12642	2259.08	1.05984	0.345489	3.64886	0.000263402	0.0245308	UP	IPR008271	Serine/threonine-protein kinase, active site	GO:0004672|GO:0006468	NA	NA	K05033	ATP-binding cassette subfamily C (CFTR/MRP) member 9
343	COBS12642	2259.08	1.05984	0.345489	3.64886	0.000263402	0.0245308	UP	-	-		PTHR24223:SF346,PTHR24223	ATP-BINDING CASSETTE SUB-FAMILY C MEMBER SUR,ATP-BINDING CASSETTE SUB-FAMILY C	NA	NA
349	COBS12642	2259.08	1.05984	0.345489	3.64886	0.000263402	0.0245308	UP	IPR002374	cGMP-dependent kinase	GO:0004692|GO:0005524	NA	NA	K05033	ATP-binding cassette subfamily C (CFTR/MRP) member 9
351	COBS12642	2259.08	1.05984	0.345489	3.64886	0.000263402	0.0245308	UP	IPR036640	ABC transporter type 1, transmembrane domain superfamily	GO:0005524|GO:0016021	NA	NA	K05033	ATP-binding cassette subfamily C (CFTR/MRP) member 9
355	COBS12642	2259.08	1.05984	0.345489	3.64886	0.000263402	0.0245308	UP	IPR000719	Protein kinase domain	GO:0004672|GO:0005524|GO:0006468	NA	NA	K05033	ATP-binding cassette subfamily C (CFTR/MRP) member 9
356	COBS12683	4.50941	0.959268	1.18223	8.6241	6.46e-18	3.61e-15	UP	-	-		NA	NA	NA	NA
357	COBS12707	42.438	0.772736	1.17494	4.85749	1.19e-06	0.000173834	UP	-	-		NA	NA	NA	NA
369	COBS13371	6.10703	0.660333	1.18033	5.65449	1.56e-08	3.22e-06	UP	-	-		NA	NA	NA	NA
405	COBS15202	977.408	0.787232	0.25617	3.53979	0.000400452	0.0353981	UP	IPR003378	Fringe-like	GO:0016020|GO:0016757	NA	NA	K00731	glycoprotein-N-acetylgalactosamine 3-beta-galactosyltransferase [EC:2.4.1.122]
407	COBS15202	977.408	0.787232	0.25617	3.53979	0.000400452	0.0353981	UP	IPR026842	Glycoprotein-N-acetylgalactosamine 3-beta-galactosyltransferase 1	GO:0016263|GO:0016266	PTHR23033:SF13	GLYCOPROTEIN-N-ACETYLGALACTOSAMINE 3-BETA-GALACTOSYLTRANSFERASE 1	K00731	glycoprotein-N-acetylgalactosamine 3-beta-galactosyltransferase [EC:2.4.1.122]
408	COBS15202	977.408	0.787232	0.25617	3.53979	0.000400452	0.0353981	UP	-	-		PTHR23033	BETA1,3-GALACTOSYLTRANSFERASE	K00731	glycoprotein-N-acetylgalactosamine 3-beta-galactosyltransferase [EC:2.4.1.122]
415	COBS15962	542.475	2.61633	0.812825	3.71551	0.000202798	0.0198311	UP	IPR009075	Acyl-CoA dehydrogenase/oxidase C-terminal	GO:0016627	NA	NA	K00249	acyl-CoA dehydrogenase [EC:1.3.8.7]
416	COBS15962	542.475	2.61633	0.812825	3.71551	0.000202798	0.0198311	UP	IPR009075	Acyl-CoA dehydrogenase/oxidase C-terminal	GO:0016627	NA	NA	K09478	short-chain 2-methylacyl-CoA dehydrogenase [EC:1.3.8.5]
417	COBS15962	542.475	2.61633	0.812825	3.71551	0.000202798	0.0198311	UP	IPR036250	Acyl-CoA dehydrogenase-like, C-terminal	GO:0016627	NA	NA	K09478	short-chain 2-methylacyl-CoA dehydrogenase [EC:1.3.8.5]
418	COBS15962	542.475	2.61633	0.812825	3.71551	0.000202798	0.0198311	UP	IPR036250	Acyl-CoA dehydrogenase-like, C-terminal	GO:0016627	NA	NA	K00249	acyl-CoA dehydrogenase [EC:1.3.8.7]
419	COBS15962	542.475	2.61633	0.812825	3.71551	0.000202798	0.0198311	UP	IPR006089	Acyl-CoA dehydrogenase, conserved site	GO:0003995	NA	NA	K09478	short-chain 2-methylacyl-CoA dehydrogenase [EC:1.3.8.5]
420	COBS15962	542.475	2.61633	0.812825	3.71551	0.000202798	0.0198311	UP	IPR046373	Acyl-CoA oxidase/dehydrogenase, middle domain superfamily	GO:0016627	NA	NA	K09478	short-chain 2-methylacyl-CoA dehydrogenase [EC:1.3.8.5]
421	COBS15962	542.475	2.61633	0.812825	3.71551	0.000202798	0.0198311	UP	-	-		PTHR43884,PTHR43884:SF1	ACYL-COA DEHYDROGENASE,SHORT/BRANCHED CHAIN SPECIFIC ACYL-COA DEHYDROGENASE, MITOCHONDRIAL	K09478	short-chain 2-methylacyl-CoA dehydrogenase [EC:1.3.8.5]
422	COBS15962	542.475	2.61633	0.812825	3.71551	0.000202798	0.0198311	UP	IPR013786	Acyl-CoA dehydrogenase/oxidase, N-terminal	GO:0016627|GO:0050660	NA	NA	K00249	acyl-CoA dehydrogenase [EC:1.3.8.7]
423	COBS15962	542.475	2.61633	0.812825	3.71551	0.000202798	0.0198311	UP	IPR009100	Acyl-CoA dehydrogenase/oxidase, N-terminal and middle domain superfamily	GO:0016627	NA	NA	K00249	acyl-CoA dehydrogenase [EC:1.3.8.7]
424	COBS15962	542.475	2.61633	0.812825	3.71551	0.000202798	0.0198311	UP	IPR009100	Acyl-CoA dehydrogenase/oxidase, N-terminal and middle domain superfamily	GO:0016627	NA	NA	K09478	short-chain 2-methylacyl-CoA dehydrogenase [EC:1.3.8.5]
425	COBS15962	542.475	2.61633	0.812825	3.71551	0.000202798	0.0198311	UP	IPR037069	Acyl-CoA dehydrogenase/oxidase, N-terminal domain superfamily	GO:0016627|GO:0050660	NA	NA	K09478	short-chain 2-methylacyl-CoA dehydrogenase [EC:1.3.8.5]
426	COBS15962	542.475	2.61633	0.812825	3.71551	0.000202798	0.0198311	UP	IPR037069	Acyl-CoA dehydrogenase/oxidase, N-terminal domain superfamily	GO:0016627|GO:0050660	NA	NA	K00249	acyl-CoA dehydrogenase [EC:1.3.8.7]
427	COBS15962	542.475	2.61633	0.812825	3.71551	0.000202798	0.0198311	UP	-	-		PTHR43884,PTHR43884:SF1	ACYL-COA DEHYDROGENASE,SHORT/BRANCHED CHAIN SPECIFIC ACYL-COA DEHYDROGENASE, MITOCHONDRIAL	K00249	acyl-CoA dehydrogenase [EC:1.3.8.7]
428	COBS15962	542.475	2.61633	0.812825	3.71551	0.000202798	0.0198311	UP	IPR006089	Acyl-CoA dehydrogenase, conserved site	GO:0003995	NA	NA	K00249	acyl-CoA dehydrogenase [EC:1.3.8.7]
429	COBS15962	542.475	2.61633	0.812825	3.71551	0.000202798	0.0198311	UP	IPR046373	Acyl-CoA oxidase/dehydrogenase, middle domain superfamily	GO:0016627	NA	NA	K00249	acyl-CoA dehydrogenase [EC:1.3.8.7]
430	COBS15962	542.475	2.61633	0.812825	3.71551	0.000202798	0.0198311	UP	IPR006091	Acyl-CoA oxidase/dehydrogenase, middle domain	GO:0016627	NA	NA	K00249	acyl-CoA dehydrogenase [EC:1.3.8.7]
431	COBS15962	542.475	2.61633	0.812825	3.71551	0.000202798	0.0198311	UP	IPR006091	Acyl-CoA oxidase/dehydrogenase, middle domain	GO:0016627	NA	NA	K09478	short-chain 2-methylacyl-CoA dehydrogenase [EC:1.3.8.5]
432	COBS15962	542.475	2.61633	0.812825	3.71551	0.000202798	0.0198311	UP	IPR013786	Acyl-CoA dehydrogenase/oxidase, N-terminal	GO:0016627|GO:0050660	NA	NA	K09478	short-chain 2-methylacyl-CoA dehydrogenase [EC:1.3.8.5]
435	COBS16615	116.165	0.143209	1.13808	5.10919	3.24e-07	5.01e-05	UP	-	-		NA	NA	NA	NA
439	COBS17368	1028.89	1.57843	0.439767	4.26093	2.04e-05	0.00254812	UP	IPR029753	D-isomer specific 2-hydroxyacid dehydrogenase, NAD-binding domain conserved site	-	NA	NA	K00049	glyoxylate/hydroxypyruvate reductase [EC:1.1.1.79 1.1.1.81]
440	COBS17368	1028.89	1.57843	0.439767	4.26093	2.04e-05	0.00254812	UP	IPR036291	NAD(P)-binding domain superfamily	-	NA	NA	K00049	glyoxylate/hydroxypyruvate reductase [EC:1.1.1.79 1.1.1.81]
441	COBS17368	1028.89	1.57843	0.439767	4.26093	2.04e-05	0.00254812	UP	-	-		PTHR10996,PTHR10996:SF119	2-HYDROXYACID DEHYDROGENASE-RELATED,FI03731P-RELATED	K00049	glyoxylate/hydroxypyruvate reductase [EC:1.1.1.79 1.1.1.81]
442	COBS17368	1028.89	1.57843	0.439767	4.26093	2.04e-05	0.00254812	UP	IPR006140	D-isomer specific 2-hydroxyacid dehydrogenase, NAD-binding domain	GO:0051287	NA	NA	K00049	glyoxylate/hydroxypyruvate reductase [EC:1.1.1.79 1.1.1.81]
443	COBS17368	1028.89	1.57843	0.439767	4.26093	2.04e-05	0.00254812	UP	IPR006139	D-isomer specific 2-hydroxyacid dehydrogenase, catalytic domain	GO:0016616|GO:0051287	NA	NA	K00049	glyoxylate/hydroxypyruvate reductase [EC:1.1.1.79 1.1.1.81]
447	COBS17903	2116.95	3.20685	0.917892	3.66227	0.000249991	0.0234213	UP	-	-		NA	NA	NA	NA
448	COBS17903	2116.95	3.20685	0.917892	3.66227	0.000249991	0.0234213	UP	-	-		PTHR24096:SF353,PTHR24096	GH16244P-RELATED,LONG-CHAIN-FATTY-ACID--COA LIGASE	K01904	4-coumarate--CoA ligase [EC:6.2.1.12]
449	COBS17903	2116.95	3.20685	0.917892	3.66227	0.000249991	0.0234213	UP	IPR045851	AMP-binding enzyme, C-terminal domain superfamily	-	NA	NA	NA	NA
450	COBS17903	2116.95	3.20685	0.917892	3.66227	0.000249991	0.0234213	UP	IPR025110	AMP-binding enzyme, C-terminal domain	-	NA	NA	NA	NA
451	COBS17903	2116.95	3.20685	0.917892	3.66227	0.000249991	0.0234213	UP	IPR020845	AMP-binding, conserved site	-	NA	NA	K01904	4-coumarate--CoA ligase [EC:6.2.1.12]
452	COBS17903	2116.95	3.20685	0.917892	3.66227	0.000249991	0.0234213	UP	IPR000873	AMP-dependent synthetase/ligase	-	NA	NA	K01904	4-coumarate--CoA ligase [EC:6.2.1.12]
453	COBS17903	2116.95	3.20685	0.917892	3.66227	0.000249991	0.0234213	UP	IPR000873	AMP-dependent synthetase/ligase	-	NA	NA	NA	NA
456	COBS17903	2116.95	3.20685	0.917892	3.66227	0.000249991	0.0234213	UP	IPR045851	AMP-binding enzyme, C-terminal domain superfamily	-	NA	NA	K01904	4-coumarate--CoA ligase [EC:6.2.1.12]
458	COBS17903	2116.95	3.20685	0.917892	3.66227	0.000249991	0.0234213	UP	IPR025110	AMP-binding enzyme, C-terminal domain	-	NA	NA	K01904	4-coumarate--CoA ligase [EC:6.2.1.12]
459	COBS17903	2116.95	3.20685	0.917892	3.66227	0.000249991	0.0234213	UP	IPR042099	ANL, N-terminal domain	-	NA	NA	K01904	4-coumarate--CoA ligase [EC:6.2.1.12]
460	COBS17903	2116.95	3.20685	0.917892	3.66227	0.000249991	0.0234213	UP	-	-		PTHR24096,PTHR24096:SF353	LONG-CHAIN-FATTY-ACID--COA LIGASE,GH16244P-RELATED	K01904	4-coumarate--CoA ligase [EC:6.2.1.12]
462	COBS17903	2116.95	3.20685	0.917892	3.66227	0.000249991	0.0234213	UP	IPR042099	ANL, N-terminal domain	-	NA	NA	NA	NA
463	COBS17903	2116.95	3.20685	0.917892	3.66227	0.000249991	0.0234213	UP	-	-		PTHR24096:SF353,PTHR24096	GH16244P-RELATED,LONG-CHAIN-FATTY-ACID--COA LIGASE	NA	NA
466	COBS17903	2116.95	3.20685	0.917892	3.66227	0.000249991	0.0234213	UP	IPR020845	AMP-binding, conserved site	-	NA	NA	NA	NA
469	COBS17903	2116.95	3.20685	0.917892	3.66227	0.000249991	0.0234213	UP	-	-		PTHR24096,PTHR24096:SF353	LONG-CHAIN-FATTY-ACID--COA LIGASE,GH16244P-RELATED	NA	NA
477	COBS17927	399.343	1.1339	0.303745	3.84524	0.000120436	0.0126466	UP	IPR016135	Ubiquitin-conjugating enzyme/RWD-like	-	NA	NA	NA	NA
478	COBS17927	399.343	1.1339	0.303745	3.84524	0.000120436	0.0126466	UP	IPR006575	RWD domain	GO:0005515	NA	NA	NA	NA
479	COBS17927	399.343	1.1339	0.303745	3.84524	0.000120436	0.0126466	UP	IPR010541	Small nuclear ribonucleoprotein Prp3, C-terminal domain	-	NA	NA	NA	NA
480	COBS17927	399.343	1.1339	0.303745	3.84524	0.000120436	0.0126466	UP	-	-		PTHR15955:SF3	RWD DOMAIN-CONTAINING PROTEIN 2A	NA	NA
481	COBS17927	399.343	1.1339	0.303745	3.84524	0.000120436	0.0126466	UP	IPR017359	Uncharacterised conserved protein UCP038021, RWD	-	PTHR15955	RWD DOMAIN CONTAINING PROTEIN 2	NA	NA
482	COBS18613	212.726	0.810801	1.11846	7.24697	4.26e-13	1.59e-10	UP	-	-		NA	NA	NA	NA
483	COBS18613	212.726	0.810801	1.11846	7.24697	4.26e-13	1.59e-10	UP	IPR013120	Fatty acyl-coenzyme A reductase, NAD-binding domain	-	NA	NA	NA	NA
484	COBS18670	21161.5	0.619444	0.227429	3.58268	0.000340083	0.0311166	UP	IPR045305	PABP, RNA recognition motif 2	-	NA	NA	K13126	polyadenylate-binding protein
485	COBS18670	21161.5	0.619444	0.227429	3.58268	0.000340083	0.0311166	UP	IPR035979	RNA-binding domain superfamily	GO:0003676	NA	NA	K13126	polyadenylate-binding protein
486	COBS18670	21161.5	0.619444	0.227429	3.58268	0.000340083	0.0311166	UP	IPR006515	Polyadenylate binding protein, human types 1, 2, 3, 4	GO:0003723	NA	NA	K13126	polyadenylate-binding protein
487	COBS18670	21161.5	0.619444	0.227429	3.58268	0.000340083	0.0311166	UP	IPR000504	RNA recognition motif domain	GO:0003723	NA	NA	K13126	polyadenylate-binding protein
488	COBS18670	21161.5	0.619444	0.227429	3.58268	0.000340083	0.0311166	UP	IPR002004	Polyadenylate-binding protein/Hyperplastic disc protein	GO:0003723	NA	NA	K13126	polyadenylate-binding protein
489	COBS18670	21161.5	0.619444	0.227429	3.58268	0.000340083	0.0311166	UP	IPR036053	PABC (PABP) domain	GO:0003723	NA	NA	K13126	polyadenylate-binding protein
490	COBS18670	21161.5	0.619444	0.227429	3.58268	0.000340083	0.0311166	UP	-	-		PTHR24012,PTHR24012:SF805	RNA BINDING PROTEIN,POLYADENYLATE-BINDING PROTEIN	K13126	polyadenylate-binding protein
491	COBS18670	21161.5	0.619444	0.227429	3.58268	0.000340083	0.0311166	UP	IPR003954	RNA recognition motif domain, eukaryote	GO:0003676	NA	NA	K13126	polyadenylate-binding protein
492	COBS18670	21161.5	0.619444	0.227429	3.58268	0.000340083	0.0311166	UP	IPR012677	Nucleotide-binding alpha-beta plait domain superfamily	-	NA	NA	K13126	polyadenylate-binding protein
495	COBS19084	18.0695	1.40939	1.09365	11.242	2.53e-29	9.91e-26	UP	IPR031959	Protein of unknown function DUF4779	-	NA	NA	NA	NA
496	COBS19084	18.0695	1.40939	1.09365	11.242	2.53e-29	9.91e-26	UP	-	-		NA	NA	NA	NA
673	COBS20094	3.32291	0.81364	1.12145	4.06431	4.82e-05	0.00554221	UP	-	-		NA	NA	NA	NA
674	COBS20208	8.27104	0.74991	1.18724	-3.71066	0.000206721	0.0200891	UP	-	-		NA	NA	NA	NA
675	COBS20245	1.80489	0.757272	1.13562	6.4266	1.3e-10	3.52e-08	UP	-	-		NA	NA	NA	NA
676	COBS20282	2.28317	0.560572	1.19116	3.74589	0.000179755	0.0180285	UP	-	-		PTHR33173	-	NA	NA
2	COBS00549	62.7069	-0.345201	1.18541	5.63083	1.79e-08	3.55e-06	DOWN	-	-		PTHR47771,PTHR47771:SF5	LD27203P-RELATED,HDC01644	NA	NA
3	COBS00551	76.4305	-0.901049	1.18367	-4.45559	8.37e-06	0.00112845	DOWN	-	-		PTHR47771:SF5,PTHR47771	HDC01644,LD27203P-RELATED	NA	NA
11	COBS00879	58.6624	-1.24223	1.17961	-9.08077	1.08e-19	8.43e-17	DOWN	-	-		NA	NA	NA	NA
29	COBS01244	2.2395	-1.32335	1.14015	-4.44148	8.93e-06	0.00118461	DOWN	IPR013604	7TM chemoreceptor	GO:0016021|GO:0050909	NA	NA	NA	NA
30	COBS01451	481.956	-2.6505	0.535678	-4.23032	2.33e-05	0.00287489	DOWN	IPR001611	Leucine-rich repeat	GO:0005515	NA	NA	NA	NA
31	COBS01451	481.956	-2.6505	0.535678	-4.23032	2.33e-05	0.00287489	DOWN	IPR000483	Cysteine-rich flanking region, C-terminal	-	NA	NA	NA	NA
32	COBS01451	481.956	-2.6505	0.535678	-4.23032	2.33e-05	0.00287489	DOWN	-	-		PTHR24366	IG(IMMUNOGLOBULIN) AND LRR(LEUCINE RICH REPEAT) DOMAINS	NA	NA
33	COBS01451	481.956	-2.6505	0.535678	-4.23032	2.33e-05	0.00287489	DOWN	IPR032675	Leucine-rich repeat domain superfamily	-	NA	NA	NA	NA
36	COBS01451	481.956	-2.6505	0.535678	-4.23032	2.33e-05	0.00287489	DOWN	IPR003591	Leucine-rich repeat, typical subtype	-	NA	NA	NA	NA
41	COBS01451	481.956	-2.6505	0.535678	-4.23032	2.33e-05	0.00287489	DOWN	-	-		PTHR24373	SLIT RELATED LEUCINE-RICH REPEAT NEURONAL PROTEIN	NA	NA
44	COBS01451	481.956	-2.6505	0.535678	-4.23032	2.33e-05	0.00287489	DOWN	-	-		PTHR45617,PTHR45617:SF69	-,SI:DKEY-1J5.4	NA	NA
45	COBS01609	4.01613	-1.81782	1.18425	-10.7523	5.78e-27	7.53e-24	DOWN	-	-		NA	NA	NA	NA
46	COBS01711	18.0508	-1.21557	1.18437	-5.60197	2.12e-08	4.14e-06	DOWN	IPR007999	Protein of unknown function DUF745	-	PTHR37161	HDC10475	NA	NA
47	COBS01711	18.0508	-1.21557	1.18437	-5.60197	2.12e-08	4.14e-06	DOWN	-	-		PTHR37161:SF2	AT11648P-RELATED	NA	NA
64	COBS01820	648.539	-1.43217	0.408513	-3.72387	0.000196196	0.0193062	DOWN	IPR001932	PPM-type phosphatase-like domain	-	NA	NA	K16340	PH domain and leucine-rich repeat-containing protein phosphatase [EC:3.1.3.16]
65	COBS01820	648.539	-1.43217	0.408513	-3.72387	0.000196196	0.0193062	DOWN	IPR003591	Leucine-rich repeat, typical subtype	-	NA	NA	K16340	PH domain and leucine-rich repeat-containing protein phosphatase [EC:3.1.3.16]
67	COBS01820	648.539	-1.43217	0.408513	-3.72387	0.000196196	0.0193062	DOWN	-	-		PTHR48051	-	K16340	PH domain and leucine-rich repeat-containing protein phosphatase [EC:3.1.3.16]
70	COBS01820	648.539	-1.43217	0.408513	-3.72387	0.000196196	0.0193062	DOWN	IPR001611	Leucine-rich repeat	GO:0005515	NA	NA	K16340	PH domain and leucine-rich repeat-containing protein phosphatase [EC:3.1.3.16]
73	COBS01820	648.539	-1.43217	0.408513	-3.72387	0.000196196	0.0193062	DOWN	IPR032675	Leucine-rich repeat domain superfamily	-	NA	NA	K16340	PH domain and leucine-rich repeat-containing protein phosphatase [EC:3.1.3.16]
79	COBS01820	648.539	-1.43217	0.408513	-3.72387	0.000196196	0.0193062	DOWN	IPR036457	PPM-type phosphatase-like domain superfamily	-	NA	NA	K16340	PH domain and leucine-rich repeat-containing protein phosphatase [EC:3.1.3.16]
82	COBS02118	11.1374	-0.907284	1.16794	-8.36259	6.14e-17	3e-14	DOWN	-	-		NA	NA	NA	NA
83	COBS02121	2.71252	-0.501731	1.18741	-8.99714	2.32e-19	1.65e-16	DOWN	-	-		NA	NA	NA	NA
150	COBS02568	577.259	-0.157313	1.08922	-7.58616	3.3e-14	1.47e-11	DOWN	-	-		NA	NA	NA	NA
152	COBS02926	143.384	-1.66833	0.616671	-3.52684	0.000420558	0.0369665	DOWN	-	-		PTHR14952,PTHR14952:SF9	ROPPORIN-1-LIKE PROTEIN,ROPPORIN-1-LIKE PROTEIN	K25457	ropporin-1-like protein
153	COBS02926	143.384	-1.66833	0.616671	-3.52684	0.000420558	0.0369665	DOWN	-	-		NA	NA	NA	NA
155	COBS03272	32.0904	-1.40385	1.17993	-10.9735	5.12e-28	8.63e-25	DOWN	-	-		NA	NA	NA	NA
156	COBS03438	4.2278	-1.36581	1.18409	-4.22024	2.44e-05	0.00295995	DOWN	-	-		NA	NA	NA	NA
157	COBS03636	26.1137	-1.18084	1.18416	-4.12109	3.77e-05	0.00443596	DOWN	-	-		NA	NA	NA	NA
158	COBS03958	2.60321	-0.493397	1.16036	-4.77913	1.76e-06	0.000250416	DOWN	-	-		NA	NA	NA	NA
160	COBS04224	9.71288	-1.60259	1.1694	-4.31963	1.56e-05	0.00199057	DOWN	-	-		NA	NA	NA	NA
161	COBS04241	5.00799	-0.96013	1.18725	-6.53588	6.32e-11	1.87e-08	DOWN	-	-		NA	NA	NA	NA
162	COBS04278	15.181	-0.126749	1.18451	-4.13076	3.62e-05	0.00431844	DOWN	-	-		NA	NA	NA	NA
163	COBS04518	5.77491	-0.280414	1.16515	-3.74127	0.00018309	0.018246	DOWN	IPR023476	Peptidyl-tRNA hydrolase II domain superfamily	-	NA	NA	NA	NA
164	COBS04518	5.77491	-0.280414	1.16515	-3.74127	0.00018309	0.018246	DOWN	IPR002833	Peptidyl-tRNA hydrolase, PTH2	GO:0004045	NA	NA	NA	NA
167	COBS05114	3.16283	-0.983467	1.18319	-6.30537	2.88e-10	7.62e-08	DOWN	-	-		NA	NA	NA	NA
169	COBS05260	19.1629	-1.45627	1.18438	-8.51436	1.68e-17	9.04e-15	DOWN	-	-		NA	NA	NA	NA
170	COBS05271	188.698	-0.223114	1.08408	-6.09038	1.13e-09	2.84e-07	DOWN	-	-		NA	NA	NA	NA
202	COBS06372	3.91056	-0.749569	1.17422	-5.83727	5.31e-09	1.15e-06	DOWN	-	-		NA	NA	NA	NA
231	COBS07382	2.38523	-1.58559	1.18253	-9.41381	4.78e-21	4.16e-18	DOWN	-	-		NA	NA	NA	NA
233	COBS09005	10.6318	-1.40603	1.17003	-5.73196	9.93e-09	2.1e-06	DOWN	-	-		NA	NA	NA	NA
234	COBS09519	1.89865	-0.3246	1.13238	-3.60103	0.000316964	0.0291719	DOWN	-	-		NA	NA	NA	NA
241	COBS09788	3.33743	-0.313093	1.12	-7.20925	5.63e-13	2e-10	DOWN	-	-		NA	NA	NA	NA
247	COBS10380	7.69025	-1.76728	1.16575	-12.7376	3.65e-37	2.86e-33	DOWN	IPR002395	HMW kininogen	-	NA	NA	NA	NA
248	COBS10380	7.69025	-1.76728	1.16575	-12.7376	3.65e-37	2.86e-33	DOWN	-	-		NA	NA	NA	NA
249	COBS10543	415.42	-5.28736	1.14861	-3.78121	0.00015607	0.0158563	DOWN	-	-		NA	NA	NA	NA
251	COBS10725	448.99	-1.80654	0.487966	-3.61465	0.000300758	0.0278441	DOWN	-	-		NA	NA	NA	NA
252	COBS10728	524.189	-1.37111	0.397796	-3.75661	0.000172229	0.0173852	DOWN	-	-		NA	NA	NA	NA
263	COBS11053	45.4314	-2.02459	1.10549	-7.53327	4.95e-14	2.09e-11	DOWN	-	-		NA	NA	NA	NA
275	COBS11691	15.6828	-0.908457	1.18464	-9.82332	8.94e-23	8.22e-20	DOWN	-	-		NA	NA	NA	NA
276	COBS11698	133.082	-0.0411682	1.02154	-5.40257	6.57e-08	1.17e-05	DOWN	-	-		NA	NA	NA	NA
291	COBS12156	4.64365	-1.02564	1.18578	-4.31935	1.56e-05	0.00199057	DOWN	-	-		NA	NA	NA	NA
358	COBS12797	4.49178	-0.896307	1.17955	-3.6794	0.000233779	0.0223031	DOWN	IPR036397	Ribonuclease H superfamily	GO:0003676	NA	NA	NA	NA
359	COBS12797	4.49178	-0.896307	1.17955	-3.6794	0.000233779	0.0223031	DOWN	IPR012337	Ribonuclease H-like superfamily	-	NA	NA	NA	NA
360	COBS12797	4.49178	-0.896307	1.17955	-3.6794	0.000233779	0.0223031	DOWN	-	-		PTHR24559,PTHR24559:SF381	TRANSPOSON TY3-I GAG-POL POLYPROTEIN,ZGC:113436	NA	NA
361	COBS12797	4.49178	-0.896307	1.17955	-3.6794	0.000233779	0.0223031	DOWN	IPR041588	Integrase zinc-binding domain	-	NA	NA	NA	NA
362	COBS12797	4.49178	-0.896307	1.17955	-3.6794	0.000233779	0.0223031	DOWN	IPR001584	Integrase, catalytic core	GO:0015074	NA	NA	NA	NA
363	COBS13057	350.328	-0.0290962	1.07624	-4.89269	9.95e-07	0.000148213	DOWN	IPR031959	Protein of unknown function DUF4779	-	NA	NA	NA	NA
364	COBS13057	350.328	-0.0290962	1.07624	-4.89269	9.95e-07	0.000148213	DOWN	-	-		NA	NA	NA	NA
367	COBS13063	8.68138	-0.424924	1.18657	-3.83457	0.000125782	0.0130331	DOWN	-	-		NA	NA	NA	NA
368	COBS13356	4.15379	-0.92514	1.08317	-4.39259	1.12e-05	0.00147266	DOWN	-	-		PTHR34239	-	NA	NA
370	COBS13643	12.9841	-2.83937	1.17828	-5.41009	6.3e-08	1.13e-05	DOWN	-	-		NA	NA	NA	NA
371	COBS13675	4.29111	-0.86858	1.19032	-5.92284	3.16e-09	7.28e-07	DOWN	-	-		NA	NA	NA	NA
372	COBS13713	3.7577	-0.688085	1.17854	-8.68273	3.86e-18	2.24e-15	DOWN	-	-		NA	NA	NA	NA
373	COBS13752	13.5654	-0.0275914	0.838083	-3.88821	0.000100985	0.010822	DOWN	-	-		NA	NA	NA	NA
374	COBS13765	180.008	-4.56747	0.892596	-3.6721	0.000240569	0.0228118	DOWN	IPR013087	Zinc finger C2H2-type	-	NA	NA	K09213	hunchback
375	COBS13765	180.008	-4.56747	0.892596	-3.6721	0.000240569	0.0228118	DOWN	IPR036236	Zinc finger C2H2 superfamily	-	NA	NA	K09213	hunchback
376	COBS13765	180.008	-4.56747	0.892596	-3.6721	0.000240569	0.0228118	DOWN	IPR027742	Protein hunchback	GO:0000981|GO:0006357|GO:0040034	PTHR24392:SF33	HUNCHBACK-LIKE	K09213	hunchback
377	COBS13765	180.008	-4.56747	0.892596	-3.6721	0.000240569	0.0228118	DOWN	-	-		PTHR24392	ZINC FINGER PROTEIN	K09213	hunchback
382	COBS13951	16.0117	-0.951585	1.18673	-5.31867	1.05e-07	1.76e-05	DOWN	-	-		NA	NA	NA	NA
383	COBS14055	10956.8	-1.58157	0.380399	-5.36422	8.13e-08	1.43e-05	DOWN	-	-		PTHR21545:SF13,PTHR21545	ECDYSONE-INDUCED PROTEIN 93F, ISOFORM C,TRANSCRIPTION FACTOR MLR1/2	K20015	ecdysone-induced protein 93F, isoform B
384	COBS14055	10956.8	-1.58157	0.380399	-5.36422	8.13e-08	1.43e-05	DOWN	IPR009057	Homeobox-like domain superfamily	-	NA	NA	K20015	ecdysone-induced protein 93F, isoform B
385	COBS14055	10956.8	-1.58157	0.380399	-5.36422	8.13e-08	1.43e-05	DOWN	IPR007889	DNA binding HTH domain, Psq-type	GO:0003677	NA	NA	K20015	ecdysone-induced protein 93F, isoform B
388	COBS14055	10956.8	-1.58157	0.380399	-5.36422	8.13e-08	1.43e-05	DOWN	-	-		PTHR21545,PTHR21545:SF13	TRANSCRIPTION FACTOR MLR1/2,ECDYSONE-INDUCED PROTEIN 93F, ISOFORM C	K20015	ecdysone-induced protein 93F, isoform B
398	COBS14088	22.0476	-0.164516	1.12893	-7.37124	1.69e-13	6.78e-11	DOWN	-	-		NA	NA	NA	NA
399	COBS14162	4.87638	-0.485078	1.1738	-5.54954	2.86e-08	5.47e-06	DOWN	-	-		NA	NA	NA	NA
400	COBS14471	3.84453	-0.413715	1.12585	-6.25992	3.85e-10	1e-07	DOWN	-	-		NA	NA	NA	NA
401	COBS14518	3.23286	-1.63133	1.19193	-6.84159	7.83e-12	2.5e-09	DOWN	-	-		NA	NA	NA	NA
402	COBS14551	2.27835	-0.731177	1.17399	-5.35396	8.6e-08	1.5e-05	DOWN	-	-		NA	NA	NA	NA
403	COBS14764	1.97035	-0.807759	1.12246	-5.42311	5.86e-08	1.07e-05	DOWN	-	-		NA	NA	NA	NA
404	COBS15003	3.32971	-1.34331	1.18194	-4.65496	3.24e-06	0.00044868	DOWN	-	-		NA	NA	NA	NA
414	COBS15834	103.946	-0.164998	1.11494	-6.78127	1.19e-11	3.73e-09	DOWN	-	-		NA	NA	NA	NA
433	COBS16199	5.59063	-0.206688	1.18941	3.54326	0.000395214	0.0353344	DOWN	-	-		NA	NA	NA	NA
434	COBS16531	6.52651	-0.597348	1.1646	-5.34584	9e-08	1.53e-05	DOWN	-	-		NA	NA	NA	NA
436	COBS16938	14.6102	-1.0048	1.18787	-9.32361	1.12e-20	9.26e-18	DOWN	-	-		NA	NA	NA	NA
437	COBS16993	3.56502	-0.822582	1.17471	-4.57857	4.68e-06	0.00064253	DOWN	-	-		NA	NA	NA	NA
438	COBS17133	4.41437	-1.5053	1.18326	-11.1455	7.53e-29	2.36e-25	DOWN	-	-		NA	NA	NA	NA
444	COBS17724	1320.16	-0.129242	1.1666	-3.85478	0.000115836	0.0122457	DOWN	IPR012464	Protein of unknown function DUF1676	-	PTHR21879	UNCHARACTERIZED	NA	NA
445	COBS17724	1320.16	-0.129242	1.1666	-3.85478	0.000115836	0.0122457	DOWN	-	-		PTHR21879:SF23	IP06949P	NA	NA
446	COBS17816	4.78953	-2.42439	1.18411	-6.45369	1.09e-10	3e-08	DOWN	-	-		NA	NA	NA	NA
493	COBS19049	6.84013	-0.655686	1.13517	-3.91521	9.03e-05	0.009814	DOWN	IPR036383	Thrombospondin type-1 (TSP1) repeat superfamily	-	NA	NA	NA	NA
494	COBS19049	6.84013	-0.655686	1.13517	-3.91521	9.03e-05	0.009814	DOWN	IPR000884	Thrombospondin type-1 (TSP1) repeat	-	NA	NA	NA	NA
499	COBS19564	1.95722	-1.43432	1.17916	-5.59458	2.21e-08	4.27e-06	DOWN	-	-		NA	NA	NA	NA
500	COBS19572	12.9894	-0.509069	1.15748	-4.32589	1.52e-05	0.00196442	DOWN	-	-		NA	NA	NA	NA
501	COBS19645	235.422	-1.59109	1.135	-5.16015	2.47e-07	3.94e-05	DOWN	IPR014031	Beta-ketoacyl synthase, C-terminal	-	NA	NA	NA	NA
503	COBS19645	235.422	-1.59109	1.135	-5.16015	2.47e-07	3.94e-05	DOWN	IPR018201	Beta-ketoacyl synthase, active site	GO:0004315|GO:0006633	NA	NA	NA	NA
504	COBS19645	235.422	-1.59109	1.135	-5.16015	2.47e-07	3.94e-05	DOWN	-	-		PTHR43775:SF23,PTHR43775	FATTY ACID SYNTHASE 3,FATTY ACID SYNTHASE	NA	NA
506	COBS19645	235.422	-1.59109	1.135	-5.16015	2.47e-07	3.94e-05	DOWN	-	-		PTHR43775,PTHR43775:SF23	FATTY ACID SYNTHASE,FATTY ACID SYNTHASE 3	NA	NA
507	COBS19645	235.422	-1.59109	1.135	-5.16015	2.47e-07	3.94e-05	DOWN	IPR016039	Thiolase-like	GO:0016746	NA	NA	NA	NA
508	COBS19645	235.422	-1.59109	1.135	-5.16015	2.47e-07	3.94e-05	DOWN	IPR014030	Beta-ketoacyl synthase, N-terminal	-	NA	NA	NA	NA
509	COBS19645	235.422	-1.59109	1.135	-5.16015	2.47e-07	3.94e-05	DOWN	IPR020841	Polyketide synthase, beta-ketoacyl synthase domain	-	NA	NA	NA	NA
510	COBS19645	235.422	-1.59109	1.135	-5.16015	2.47e-07	3.94e-05	DOWN	IPR001227	Acyl transferase domain superfamily	GO:0016740	NA	NA	NA	NA
512	COBS19645	235.422	-1.59109	1.135	-5.16015	2.47e-07	3.94e-05	DOWN	IPR014043	Acyl transferase	-	NA	NA	K00665	fatty acid synthase, animal type [EC:2.3.1.85]
519	COBS19645	235.422	-1.59109	1.135	-5.16015	2.47e-07	3.94e-05	DOWN	IPR032821	Polyketide synthase, C-terminal extension	-	NA	NA	NA	NA
523	COBS19645	235.422	-1.59109	1.135	-5.16015	2.47e-07	3.94e-05	DOWN	IPR042104	Polyketide synthase, dehydratase domain superfamily	-	NA	NA	NA	NA
524	COBS19645	235.422	-1.59109	1.135	-5.16015	2.47e-07	3.94e-05	DOWN	IPR020841	Polyketide synthase, beta-ketoacyl synthase domain	-	NA	NA	K00665	fatty acid synthase, animal type [EC:2.3.1.85]
534	COBS19645	235.422	-1.59109	1.135	-5.16015	2.47e-07	3.94e-05	DOWN	IPR020807	Polyketide synthase, dehydratase domain	-	NA	NA	NA	NA
540	COBS19645	235.422	-1.59109	1.135	-5.16015	2.47e-07	3.94e-05	DOWN	IPR016035	Acyl transferase/acyl hydrolase/lysophospholipase	-	NA	NA	NA	NA
544	COBS19645	235.422	-1.59109	1.135	-5.16015	2.47e-07	3.94e-05	DOWN	IPR014043	Acyl transferase	-	NA	NA	NA	NA
545	COBS19645	235.422	-1.59109	1.135	-5.16015	2.47e-07	3.94e-05	DOWN	IPR016036	Malonyl-CoA ACP transacylase, ACP-binding	-	NA	NA	NA	NA
551	COBS19645	235.422	-1.59109	1.135	-5.16015	2.47e-07	3.94e-05	DOWN	IPR042104	Polyketide synthase, dehydratase domain superfamily	-	NA	NA	K00665	fatty acid synthase, animal type [EC:2.3.1.85]
567	COBS19645	235.422	-1.59109	1.135	-5.16015	2.47e-07	3.94e-05	DOWN	-	-		PTHR43775:SF7,PTHR43775	FATTY ACID SYNTHASE,FATTY ACID SYNTHASE	NA	NA
572	COBS19645	235.422	-1.59109	1.135	-5.16015	2.47e-07	3.94e-05	DOWN	-	-		PTHR43775,PTHR43775:SF7	FATTY ACID SYNTHASE,FATTY ACID SYNTHASE	NA	NA
579	COBS19645	235.422	-1.59109	1.135	-5.16015	2.47e-07	3.94e-05	DOWN	IPR020807	Polyketide synthase, dehydratase domain	-	NA	NA	K00665	fatty acid synthase, animal type [EC:2.3.1.85]
580	COBS19645	235.422	-1.59109	1.135	-5.16015	2.47e-07	3.94e-05	DOWN	IPR016036	Malonyl-CoA ACP transacylase, ACP-binding	-	NA	NA	K00665	fatty acid synthase, animal type [EC:2.3.1.85]
581	COBS19645	235.422	-1.59109	1.135	-5.16015	2.47e-07	3.94e-05	DOWN	-	-		PTHR43775,PTHR43775:SF23	FATTY ACID SYNTHASE,FATTY ACID SYNTHASE 3	K00665	fatty acid synthase, animal type [EC:2.3.1.85]
582	COBS19645	235.422	-1.59109	1.135	-5.16015	2.47e-07	3.94e-05	DOWN	IPR016039	Thiolase-like	GO:0016746	NA	NA	K00665	fatty acid synthase, animal type [EC:2.3.1.85]
583	COBS19645	235.422	-1.59109	1.135	-5.16015	2.47e-07	3.94e-05	DOWN	IPR016035	Acyl transferase/acyl hydrolase/lysophospholipase	-	NA	NA	K00665	fatty acid synthase, animal type [EC:2.3.1.85]
584	COBS19645	235.422	-1.59109	1.135	-5.16015	2.47e-07	3.94e-05	DOWN	IPR032821	Polyketide synthase, C-terminal extension	-	NA	NA	K00665	fatty acid synthase, animal type [EC:2.3.1.85]
586	COBS19645	235.422	-1.59109	1.135	-5.16015	2.47e-07	3.94e-05	DOWN	IPR001227	Acyl transferase domain superfamily	GO:0016740	NA	NA	K00665	fatty acid synthase, animal type [EC:2.3.1.85]
589	COBS19645	235.422	-1.59109	1.135	-5.16015	2.47e-07	3.94e-05	DOWN	IPR014030	Beta-ketoacyl synthase, N-terminal	-	NA	NA	K00665	fatty acid synthase, animal type [EC:2.3.1.85]
591	COBS19645	235.422	-1.59109	1.135	-5.16015	2.47e-07	3.94e-05	DOWN	IPR014031	Beta-ketoacyl synthase, C-terminal	-	NA	NA	K00665	fatty acid synthase, animal type [EC:2.3.1.85]
596	COBS19645	235.422	-1.59109	1.135	-5.16015	2.47e-07	3.94e-05	DOWN	-	-		PTHR43775:SF23,PTHR43775	FATTY ACID SYNTHASE 3,FATTY ACID SYNTHASE	K00665	fatty acid synthase, animal type [EC:2.3.1.85]
598	COBS19645	235.422	-1.59109	1.135	-5.16015	2.47e-07	3.94e-05	DOWN	IPR018201	Beta-ketoacyl synthase, active site	GO:0004315|GO:0006633	NA	NA	K00665	fatty acid synthase, animal type [EC:2.3.1.85]
619	COBS19652	4.88293	-1.14391	1.11051	-4.98861	6.08e-07	9.24e-05	DOWN	-	-		NA	NA	NA	NA
620	COBS19655	38.4933	-0.27478	1.18492	-3.70378	0.000212411	0.0205147	DOWN	IPR042104	Polyketide synthase, dehydratase domain superfamily	-	NA	NA	NA	NA
621	COBS19655	38.4933	-0.27478	1.18492	-3.70378	0.000212411	0.0205147	DOWN	IPR014043	Acyl transferase	-	NA	NA	NA	NA
622	COBS19655	38.4933	-0.27478	1.18492	-3.70378	0.000212411	0.0205147	DOWN	IPR014043	Acyl transferase	-	NA	NA	K00665	fatty acid synthase, animal type [EC:2.3.1.85]
623	COBS19655	38.4933	-0.27478	1.18492	-3.70378	0.000212411	0.0205147	DOWN	IPR032821	Polyketide synthase, C-terminal extension	-	NA	NA	NA	NA
624	COBS19655	38.4933	-0.27478	1.18492	-3.70378	0.000212411	0.0205147	DOWN	-	-		PTHR43775:SF7,PTHR43775	FATTY ACID SYNTHASE,FATTY ACID SYNTHASE	NA	NA
625	COBS19655	38.4933	-0.27478	1.18492	-3.70378	0.000212411	0.0205147	DOWN	-	-		PTHR43775,PTHR43775:SF23	FATTY ACID SYNTHASE,FATTY ACID SYNTHASE 3	NA	NA
627	COBS19655	38.4933	-0.27478	1.18492	-3.70378	0.000212411	0.0205147	DOWN	IPR020807	Polyketide synthase, dehydratase domain	-	NA	NA	NA	NA
628	COBS19655	38.4933	-0.27478	1.18492	-3.70378	0.000212411	0.0205147	DOWN	-	-		PTHR43775:SF23,PTHR43775	FATTY ACID SYNTHASE 3,FATTY ACID SYNTHASE	K00665	fatty acid synthase, animal type [EC:2.3.1.85]
629	COBS19655	38.4933	-0.27478	1.18492	-3.70378	0.000212411	0.0205147	DOWN	IPR016035	Acyl transferase/acyl hydrolase/lysophospholipase	-	NA	NA	K00665	fatty acid synthase, animal type [EC:2.3.1.85]
630	COBS19655	38.4933	-0.27478	1.18492	-3.70378	0.000212411	0.0205147	DOWN	IPR016039	Thiolase-like	GO:0016746	NA	NA	K00665	fatty acid synthase, animal type [EC:2.3.1.85]
631	COBS19655	38.4933	-0.27478	1.18492	-3.70378	0.000212411	0.0205147	DOWN	IPR016036	Malonyl-CoA ACP transacylase, ACP-binding	-	NA	NA	NA	NA
632	COBS19655	38.4933	-0.27478	1.18492	-3.70378	0.000212411	0.0205147	DOWN	IPR016039	Thiolase-like	GO:0016746	NA	NA	NA	NA
633	COBS19655	38.4933	-0.27478	1.18492	-3.70378	0.000212411	0.0205147	DOWN	IPR001227	Acyl transferase domain superfamily	GO:0016740	NA	NA	NA	NA
637	COBS19655	38.4933	-0.27478	1.18492	-3.70378	0.000212411	0.0205147	DOWN	-	-		PTHR43775,PTHR43775:SF7	FATTY ACID SYNTHASE,FATTY ACID SYNTHASE	NA	NA
638	COBS19655	38.4933	-0.27478	1.18492	-3.70378	0.000212411	0.0205147	DOWN	IPR016035	Acyl transferase/acyl hydrolase/lysophospholipase	-	NA	NA	NA	NA
645	COBS19655	38.4933	-0.27478	1.18492	-3.70378	0.000212411	0.0205147	DOWN	IPR016036	Malonyl-CoA ACP transacylase, ACP-binding	-	NA	NA	K00665	fatty acid synthase, animal type [EC:2.3.1.85]
646	COBS19655	38.4933	-0.27478	1.18492	-3.70378	0.000212411	0.0205147	DOWN	IPR042104	Polyketide synthase, dehydratase domain superfamily	-	NA	NA	K00665	fatty acid synthase, animal type [EC:2.3.1.85]
647	COBS19655	38.4933	-0.27478	1.18492	-3.70378	0.000212411	0.0205147	DOWN	IPR020807	Polyketide synthase, dehydratase domain	-	NA	NA	K00665	fatty acid synthase, animal type [EC:2.3.1.85]
648	COBS19655	38.4933	-0.27478	1.18492	-3.70378	0.000212411	0.0205147	DOWN	-	-		PTHR43775:SF23,PTHR43775	FATTY ACID SYNTHASE 3,FATTY ACID SYNTHASE	NA	NA
659	COBS19655	38.4933	-0.27478	1.18492	-3.70378	0.000212411	0.0205147	DOWN	IPR032821	Polyketide synthase, C-terminal extension	-	NA	NA	K00665	fatty acid synthase, animal type [EC:2.3.1.85]
662	COBS19655	38.4933	-0.27478	1.18492	-3.70378	0.000212411	0.0205147	DOWN	IPR001227	Acyl transferase domain superfamily	GO:0016740	NA	NA	K00665	fatty acid synthase, animal type [EC:2.3.1.85]
668	COBS19979	51.1315	-0.285952	1.17299	-4.86159	1.16e-06	0.000171881	DOWN	IPR038211	Ant venom allergen, Sol i 2/4 superfamily	-	NA	NA	NA	NA
669	COBS20077	17.7469	-2.34406	1.18476	-10.9878	4.37e-28	8.55e-25	DOWN	IPR036770	Ankyrin repeat-containing domain superfamily	-	NA	NA	K21486	ankyrin repeat family A protein 2
670	COBS20077	17.7469	-2.34406	1.18476	-10.9878	4.37e-28	8.55e-25	DOWN	-	-		PTHR24161:SF91,PTHR24161	TRANSIENT RECEPTOR POTENTIAL CHANNEL PYREXIA,-	K21486	ankyrin repeat family A protein 2
671	COBS20077	17.7469	-2.34406	1.18476	-10.9878	4.37e-28	8.55e-25	DOWN	IPR002110	Ankyrin repeat	GO:0005515	NA	NA	K21486	ankyrin repeat family A protein 2
672	COBS20077	17.7469	-2.34406	1.18476	-10.9878	4.37e-28	8.55e-25	DOWN	IPR005821	Ion transport domain	GO:0005216|GO:0006811|GO:0016020|GO:0055085	NA	NA	K21486	ankyrin repeat family A protein 2
677	COBS20506	3.50669	-0.639172	0.902618	-3.92273	8.76e-05	0.00957914	DOWN	IPR001878	Zinc finger, CCHC-type	GO:0003676|GO:0008270	NA	NA	NA	NA
678	COBS20506	3.50669	-0.639172	0.902618	-3.92273	8.76e-05	0.00957914	DOWN	-	-		NA	NA	NA	NA
679	COBS20506	3.50669	-0.639172	0.902618	-3.92273	8.76e-05	0.00957914	DOWN	IPR036875	Zinc finger, CCHC-type superfamily	GO:0003676|GO:0008270	NA	NA	NA	NA
680	COBS20948	3.2709	-1.04076	1.17548	-4.10523	4.04e-05	0.00471621	DOWN	IPR040618	Pre-nudix hydrolase domain	-	NA	NA	NA	NA
681	COBS20948	3.2709	-1.04076	1.17548	-4.10523	4.04e-05	0.00471621	DOWN	IPR015797	NUDIX hydrolase-like domain superfamily	-	NA	NA	NA	NA
682	COBS20948	3.2709	-1.04076	1.17548	-4.10523	4.04e-05	0.00471621	DOWN	IPR020476	NUDIX hydrolase	-	NA	NA	NA	NA
683	COBS20948	3.2709	-1.04076	1.17548	-4.10523	4.04e-05	0.00471621	DOWN	IPR000086	NUDIX hydrolase domain	-	NA	NA	NA	NA
684	COBS20948	3.2709	-1.04076	1.17548	-4.10523	4.04e-05	0.00471621	DOWN	IPR003293	Nudix hydrolase 6-like	-	PTHR13994	NUDIX HYDROLASE RELATED	NA	NA
685	COBS20948	3.2709	-1.04076	1.17548	-4.10523	4.04e-05	0.00471621	DOWN	IPR020084	NUDIX hydrolase, conserved site	GO:0016787	NA	NA	NA	NA
686	COBS20948	3.2709	-1.04076	1.17548	-4.10523	4.04e-05	0.00471621	DOWN	-	-		PTHR13994:SF34	FI03680P	NA	NA

## Sheet: 2-Pupae
	target_id	baseMean	log2FoldChange	lfcSE	stat	pvalue	padj	DEG	interpro_id	domain_description	GO_id	PANTHER	description_PANTHER	KO	desciption_KEGG
238	COBS00777	128.03	4.63135	0.859749	5.1693	2.35e-07	3.98e-05	UP	IPR018114	Serine proteases, trypsin family, histidine active site	GO:0004252|GO:0006508	NA	NA	NA	NA
239	COBS00777	128.03	4.63135	0.859749	5.1693	2.35e-07	3.98e-05	UP	IPR043504	Peptidase S1, PA clan, chymotrypsin-like fold	-	NA	NA	NA	NA
240	COBS00777	128.03	4.63135	0.859749	5.1693	2.35e-07	3.98e-05	UP	IPR001254	Serine proteases, trypsin domain	GO:0004252|GO:0006508	NA	NA	NA	NA
243	COBS00777	128.03	4.63135	0.859749	5.1693	2.35e-07	3.98e-05	UP	IPR001314	Peptidase S1A, chymotrypsin family	GO:0004252|GO:0006508	NA	NA	NA	NA
245	COBS00777	128.03	4.63135	0.859749	5.1693	2.35e-07	3.98e-05	UP	IPR009003	Peptidase S1, PA clan	-	NA	NA	NA	NA
248	COBS00777	128.03	4.63135	0.859749	5.1693	2.35e-07	3.98e-05	UP	-	-		PTHR24256,PTHR24256:SF505	TRYPTASE-RELATED,AGAP011910-PA	NA	NA
255	COBS00777	128.03	4.63135	0.859749	5.1693	2.35e-07	3.98e-05	UP	IPR035914	Spermadhesin, CUB domain superfamily	-	NA	NA	NA	NA
256	COBS00777	128.03	4.63135	0.859749	5.1693	2.35e-07	3.98e-05	UP	IPR000859	CUB domain	-	NA	NA	NA	NA
267	COBS00777	128.03	4.63135	0.859749	5.1693	2.35e-07	3.98e-05	UP	-	-		PTHR24256:SF505,PTHR24256	AGAP011910-PA,TRYPTASE-RELATED	NA	NA
7486	COBS16586	247.948	4.18045	0.921628	3.8483	0.00011894	0.00655259	UP	-	-		PTHR37159	GH11867P	NA	NA
7487	COBS16586	247.948	4.18045	0.921628	3.8483	0.00011894	0.00655259	UP	IPR018713	ER-bound oxygenase mpaB/mpaB'/Rubber oxygenase, catalytic domain	GO:0016491	NA	NA	NA	NA
5892	COBS12546	254.408	3.96335	0.996974	3.53396	0.000409383	0.0151423	UP	-	-		PTHR47771:SF3,PTHR47771	AGAP002453-PA,LD27203P-RELATED	NA	NA
968	COBS02756	110.625	3.92278	0.771479	4.04194	5.3e-05	0.00354445	UP	IPR008197	WAP-type 'four-disulfide core' domain	GO:0005576|GO:0030414	NA	NA	NA	NA
970	COBS02756	110.625	3.92278	0.771479	4.04194	5.3e-05	0.00354445	UP	IPR036645	Elafin-like superfamily	-	NA	NA	NA	NA
3938	COBS08257	26.5986	3.75053	0.833211	3.93577	8.29e-05	0.00506856	UP	-	-		NA	NA	NA	NA
7237	COBS15645	1323.93	3.72844	0.827684	3.9612	7.46e-05	0.00474301	UP	-	-		NA	NA	NA	NA
4311	COBS09334	6559.37	3.62434	0.655318	4.6035	4.15e-06	0.000474454	UP	IPR022272	Lipocalin family conserved site	-	NA	NA	K03098	apolipoprotein D and lipocalin family protein
4312	COBS09334	6559.37	3.62434	0.655318	4.6035	4.15e-06	0.000474454	UP	IPR003057	Invertebrate colouration protein	GO:0031409	NA	NA	K03098	apolipoprotein D and lipocalin family protein
4314	COBS09334	6559.37	3.62434	0.655318	4.6035	4.15e-06	0.000474454	UP	-	-		PTHR10612,PTHR10612:SF48	APOLIPOPROTEIN D,APOLIPOPROTEIN D	K03098	apolipoprotein D and lipocalin family protein
4315	COBS09334	6559.37	3.62434	0.655318	4.6035	4.15e-06	0.000474454	UP	-	-		PTHR10612:SF48,PTHR10612	APOLIPOPROTEIN D,APOLIPOPROTEIN D	K03098	apolipoprotein D and lipocalin family protein
4317	COBS09334	6559.37	3.62434	0.655318	4.6035	4.15e-06	0.000474454	UP	IPR002969	Apolipoprotein D	GO:0006869|GO:0007568|GO:0008289	NA	NA	K03098	apolipoprotein D and lipocalin family protein
4318	COBS09334	6559.37	3.62434	0.655318	4.6035	4.15e-06	0.000474454	UP	IPR000566	Lipocalin/cytosolic fatty-acid binding domain	-	NA	NA	K03098	apolipoprotein D and lipocalin family protein
4319	COBS09334	6559.37	3.62434	0.655318	4.6035	4.15e-06	0.000474454	UP	IPR012674	Calycin	-	NA	NA	K03098	apolipoprotein D and lipocalin family protein
4322	COBS09334	6559.37	3.62434	0.655318	4.6035	4.15e-06	0.000474454	UP	IPR022271	Lipocalin, ApoD type	-	NA	NA	K03098	apolipoprotein D and lipocalin family protein
7810	COBS18117	2482.6	3.56299	1.03074	3.24365	0.00118007	0.0310223	UP	-	-		NA	NA	NA	NA
178	COBS00432	408.885	3.34865	0.746999	3.5982	0.000320433	0.0129883	UP	IPR001507	Zona pellucida domain	-	NA	NA	NA	NA
179	COBS00432	408.885	3.34865	0.746999	3.5982	0.000320433	0.0129883	UP	-	-		PTHR39959,PTHR39959:SF1	RE44287P-RELATED,-	NA	NA
8296	COBS19534	786.561	3.30504	0.534525	6.4814	9.09e-11	2.37e-08	UP	-	-		PTHR23199:SF7,PTHR23199	RE45222P,UNCHARACTERIZED	NA	NA
8297	COBS19534	786.561	3.30504	0.534525	6.4814	9.09e-11	2.37e-08	UP	IPR029034	Cystine-knot cytokine	-	NA	NA	NA	NA
8299	COBS19534	786.561	3.30504	0.534525	6.4814	9.09e-11	2.37e-08	UP	-	-		PTHR23199,PTHR23199:SF7	UNCHARACTERIZED,RE45222P	NA	NA
3374	COBS07003	8707.96	3.29228	0.677361	4.33492	1.46e-05	0.00126046	UP	IPR003146	Carboxypeptidase, activation peptide	-	NA	NA	NA	NA
3375	COBS07003	8707.96	3.29228	0.677361	4.33492	1.46e-05	0.00126046	UP	IPR000834	Peptidase M14, carboxypeptidase A	GO:0004181|GO:0006508|GO:0008270	NA	NA	NA	NA
3376	COBS07003	8707.96	3.29228	0.677361	4.33492	1.46e-05	0.00126046	UP	-	-		PTHR11705,PTHR11705:SF86	PROTEASE FAMILY M14 CARBOXYPEPTIDASE A,B,LP17541P-RELATED	NA	NA
3377	COBS07003	8707.96	3.29228	0.677361	4.33492	1.46e-05	0.00126046	UP	IPR036990	Metallocarboxypeptidase-like, propeptide	-	NA	NA	NA	NA
6005	COBS12872	1885.22	3.09374	0.788306	3.88587	0.000101964	0.00595274	UP	-	-		NA	NA	NA	NA
6042	COBS13510	1484.87	3.05972	0.827345	3.23955	0.00119717	0.0312183	UP	-	-		NA	NA	NA	NA
7501	COBS16652	17.7389	3.03668	0.95901	3.19178	0.00141401	0.0346221	UP	IPR006631	Protein of unknown function DM4/12	-	NA	NA	NA	NA
7502	COBS16652	17.7389	3.03668	0.95901	3.19178	0.00141401	0.0346221	UP	-	-		PTHR21253	UNCHARACTERIZED	NA	NA
573	COBS01503	2214.47	3.02557	0.425408	7.42983	1.09e-13	3.96e-11	UP	IPR010629	Insect allergen-related	-	PTHR21163	UNCHARACTERIZED	NA	NA
5739	COBS11963	282.064	2.94232	0.720406	3.872	0.000107946	0.00618655	UP	IPR036728	Pheromone/general odorant binding protein superfamily	GO:0005549	NA	NA	NA	NA
5740	COBS11963	282.064	2.94232	0.720406	3.872	0.000107946	0.00618655	UP	IPR006170	Pheromone/general odorant binding protein	GO:0005549	NA	NA	NA	NA
5743	COBS11963	282.064	2.94232	0.720406	3.872	0.000107946	0.00618655	UP	-	-		NA	NA	NA	NA
5364	COBS11057	175.718	2.85056	0.594404	4.56212	5.06e-06	0.000557963	UP	-	-		PTHR23511,PTHR23511:SF5	SYNAPTIC VESICLE GLYCOPROTEIN 2,SYNAPTIC VESICLE GLYCOPROTEIN 2	K06258	MFS transporter, VNT family, synaptic vesicle glycoprotein 2
5365	COBS11057	175.718	2.85056	0.594404	4.56212	5.06e-06	0.000557963	UP	IPR005828	Major facilitator, sugar transporter-like	GO:0016021|GO:0022857|GO:0055085	NA	NA	K06258	MFS transporter, VNT family, synaptic vesicle glycoprotein 2
5366	COBS11057	175.718	2.85056	0.594404	4.56212	5.06e-06	0.000557963	UP	-	-		PTHR23511:SF5,PTHR23511	SYNAPTIC VESICLE GLYCOPROTEIN 2,SYNAPTIC VESICLE GLYCOPROTEIN 2	K06258	MFS transporter, VNT family, synaptic vesicle glycoprotein 2
5367	COBS11057	175.718	2.85056	0.594404	4.56212	5.06e-06	0.000557963	UP	IPR036259	MFS transporter superfamily	-	NA	NA	K06258	MFS transporter, VNT family, synaptic vesicle glycoprotein 2
5368	COBS11057	175.718	2.85056	0.594404	4.56212	5.06e-06	0.000557963	UP	IPR020846	Major facilitator superfamily domain	GO:0022857	NA	NA	K06258	MFS transporter, VNT family, synaptic vesicle glycoprotein 2
3561	COBS07466	378.76	2.79672	0.833771	3.16729	0.00153868	0.0370372	UP	IPR029034	Cystine-knot cytokine	-	NA	NA	NA	NA
3563	COBS07466	378.76	2.79672	0.833771	3.16729	0.00153868	0.0370372	UP	-	-		PTHR41153	RE41427P	NA	NA
4798	COBS09746	217.943	2.77468	0.644728	3.47261	0.000515425	0.0175985	UP	-	-		PTHR33236,PTHR33236:SF4	INTRAFLAGELLAR TRANSPORT PROTEIN 122 FAMILY PROTEIN-RELATED,-	NA	NA
4799	COBS09746	217.943	2.77468	0.644728	3.47261	0.000515425	0.0175985	UP	IPR000859	CUB domain	-	NA	NA	NA	NA
4800	COBS09746	217.943	2.77468	0.644728	3.47261	0.000515425	0.0175985	UP	IPR035914	Spermadhesin, CUB domain superfamily	-	NA	NA	NA	NA
4803	COBS09746	217.943	2.77468	0.644728	3.47261	0.000515425	0.0175985	UP	-	-		PTHR33236:SF4,PTHR33236	-,INTRAFLAGELLAR TRANSPORT PROTEIN 122 FAMILY PROTEIN-RELATED	NA	NA
2869	COBS06323	2210.72	2.76629	0.51604	5.36716	8e-08	1.49e-05	UP	-	-		NA	NA	NA	NA
6251	COBS14285	343.142	2.74752	0.733439	3.56656	0.000361693	0.0141476	UP	IPR007867	Glucose-methanol-choline oxidoreductase, C-terminal	GO:0016614	NA	NA	NA	NA
6252	COBS14285	343.142	2.74752	0.733439	3.56656	0.000361693	0.0141476	UP	IPR036188	FAD/NAD(P)-binding domain superfamily	-	NA	NA	K00115	glucose 1-dehydrogenase (FAD, quinone) [EC:1.1.5.9]
6253	COBS14285	343.142	2.74752	0.733439	3.56656	0.000361693	0.0141476	UP	IPR012132	Glucose-methanol-choline oxidoreductase	GO:0050660	PTHR11552	GLUCOSE-METHANOL-CHOLINE GMC OXIDOREDUCTASE	NA	NA
6254	COBS14285	343.142	2.74752	0.733439	3.56656	0.000361693	0.0141476	UP	-	-		PTHR11552:SF154	FI04917P	NA	NA
6255	COBS14285	343.142	2.74752	0.733439	3.56656	0.000361693	0.0141476	UP	IPR007867	Glucose-methanol-choline oxidoreductase, C-terminal	GO:0016614	NA	NA	K00115	glucose 1-dehydrogenase (FAD, quinone) [EC:1.1.5.9]
6256	COBS14285	343.142	2.74752	0.733439	3.56656	0.000361693	0.0141476	UP	-	-		PTHR11552:SF154	FI04917P	K00115	glucose 1-dehydrogenase (FAD, quinone) [EC:1.1.5.9]
6257	COBS14285	343.142	2.74752	0.733439	3.56656	0.000361693	0.0141476	UP	IPR036188	FAD/NAD(P)-binding domain superfamily	-	NA	NA	NA	NA
6258	COBS14285	343.142	2.74752	0.733439	3.56656	0.000361693	0.0141476	UP	IPR000172	Glucose-methanol-choline oxidoreductase, N-terminal	GO:0016614|GO:0050660	NA	NA	NA	NA
6264	COBS14285	343.142	2.74752	0.733439	3.56656	0.000361693	0.0141476	UP	IPR012132	Glucose-methanol-choline oxidoreductase	GO:0050660	PTHR11552	GLUCOSE-METHANOL-CHOLINE GMC OXIDOREDUCTASE	K00115	glucose 1-dehydrogenase (FAD, quinone) [EC:1.1.5.9]
6265	COBS14285	343.142	2.74752	0.733439	3.56656	0.000361693	0.0141476	UP	IPR000172	Glucose-methanol-choline oxidoreductase, N-terminal	GO:0016614|GO:0050660	NA	NA	K00115	glucose 1-dehydrogenase (FAD, quinone) [EC:1.1.5.9]
188	COBS00515	8031.93	2.6644	0.861927	3.13123	0.00174076	0.0404095	UP	IPR006170	Pheromone/general odorant binding protein	GO:0005549	NA	NA	NA	NA
189	COBS00515	8031.93	2.6644	0.861927	3.13123	0.00174076	0.0404095	UP	-	-		PTHR11857:SF43,PTHR11857	GEO07581P1-RELATED,ODORANT BINDING PROTEIN-RELATED	NA	NA
190	COBS00515	8031.93	2.6644	0.861927	3.13123	0.00174076	0.0404095	UP	IPR036728	Pheromone/general odorant binding protein superfamily	GO:0005549	NA	NA	NA	NA
2658	COBS05714	7699.54	2.6281	0.586138	4.41358	1.02e-05	0.000981997	UP	IPR011030	Lipovitellin-phosvitin complex, superhelical domain	-	NA	NA	NA	NA
2659	COBS05714	7699.54	2.6281	0.586138	4.41358	1.02e-05	0.000981997	UP	IPR015819	Lipid transport protein, beta-sheet shell	GO:0005319|GO:0006869	NA	NA	NA	NA
2661	COBS05714	7699.54	2.6281	0.586138	4.41358	1.02e-05	0.000981997	UP	IPR015255	Vitellinogen, open beta-sheet	GO:0005319|GO:0006869	NA	NA	NA	NA
2662	COBS05714	7699.54	2.6281	0.586138	4.41358	1.02e-05	0.000981997	UP	-	-		PTHR23345	VITELLOGENIN-RELATED	NA	NA
2663	COBS05714	7699.54	2.6281	0.586138	4.41358	1.02e-05	0.000981997	UP	IPR015816	Vitellinogen, beta-sheet N-terminal	GO:0005319|GO:0006869	NA	NA	NA	NA
2664	COBS05714	7699.54	2.6281	0.586138	4.41358	1.02e-05	0.000981997	UP	IPR001747	Vitellogenin, N-terminal	GO:0005319|GO:0006869	NA	NA	NA	NA
2668	COBS05714	7699.54	2.6281	0.586138	4.41358	1.02e-05	0.000981997	UP	IPR001846	von Willebrand factor, type D domain	-	NA	NA	NA	NA
5144	COBS10650	142.071	2.5931	0.786638	3.21154	0.00132026	0.0332103	UP	-	-		PTHR24260:SF107,PTHR24260	EG:BACR7A4.3 PROTEIN-RELATED,-	NA	NA
5145	COBS10650	142.071	2.5931	0.786638	3.21154	0.00132026	0.0332103	UP	IPR033116	Serine proteases, trypsin family, serine active site	-	NA	NA	NA	NA
5146	COBS10650	142.071	2.5931	0.786638	3.21154	0.00132026	0.0332103	UP	IPR001314	Peptidase S1A, chymotrypsin family	GO:0004252|GO:0006508	NA	NA	NA	NA
5147	COBS10650	142.071	2.5931	0.786638	3.21154	0.00132026	0.0332103	UP	IPR018114	Serine proteases, trypsin family, histidine active site	GO:0004252|GO:0006508	NA	NA	NA	NA
5148	COBS10650	142.071	2.5931	0.786638	3.21154	0.00132026	0.0332103	UP	IPR043504	Peptidase S1, PA clan, chymotrypsin-like fold	-	NA	NA	NA	NA
5149	COBS10650	142.071	2.5931	0.786638	3.21154	0.00132026	0.0332103	UP	IPR001254	Serine proteases, trypsin domain	GO:0004252|GO:0006508	NA	NA	NA	NA
5154	COBS10650	142.071	2.5931	0.786638	3.21154	0.00132026	0.0332103	UP	IPR009003	Peptidase S1, PA clan	-	NA	NA	NA	NA
186	COBS00506	245.963	2.5708	0.578304	3.69909	0.000216378	0.0098129	UP	-	-		PTHR46560,PTHR46560:SF4	CYPHER, ISOFORM B,DUSKY	NA	NA
187	COBS00506	245.963	2.5708	0.578304	3.69909	0.000216378	0.0098129	UP	IPR001507	Zona pellucida domain	-	NA	NA	NA	NA
6125	COBS13660	583.883	2.47904	0.662752	3.44155	0.00057839	0.0189717	UP	-	-		PTHR21219:SF4,PTHR21219	AGAP002199-PA,FI19613P1	NA	NA
6126	COBS13660	583.883	2.47904	0.662752	3.44155	0.00057839	0.0189717	UP	IPR006020	PTB/PI domain	-	NA	NA	NA	NA
7669	COBS17608	913.248	2.46536	0.48025	4.51603	6.3e-06	0.00067066	UP	IPR005828	Major facilitator, sugar transporter-like	GO:0016021|GO:0022857|GO:0055085	NA	NA	NA	NA
7670	COBS17608	913.248	2.46536	0.48025	4.51603	6.3e-06	0.00067066	UP	IPR020846	Major facilitator superfamily domain	GO:0022857	NA	NA	NA	NA
7672	COBS17608	913.248	2.46536	0.48025	4.51603	6.3e-06	0.00067066	UP	IPR036259	MFS transporter superfamily	-	NA	NA	NA	NA
7674	COBS17608	913.248	2.46536	0.48025	4.51603	6.3e-06	0.00067066	UP	-	-		PTHR24064:SF198,PTHR24064	SOLUTE CARRIER FAMILY 22 MEMBER 13,SOLUTE CARRIER FAMILY 22 MEMBER	NA	NA
8323	COBS19665	243.581	2.41952	0.903615	3.32231	0.00089276	0.0259149	UP	-	-		PTHR37159	GH11867P	NA	NA
6280	COBS14486	3528.23	2.39721	0.546527	3.58699	0.000334523	0.0134248	UP	-	-		NA	NA	NA	NA
5361	COBS11047	396.576	2.39272	0.674101	3.79488	0.000147713	0.00762743	UP	-	-		PTHR46560,PTHR46560:SF3	CYPHER, ISOFORM B,AGAP006705-PA	NA	NA
5362	COBS11047	396.576	2.39272	0.674101	3.79488	0.000147713	0.00762743	UP	IPR001507	Zona pellucida domain	-	NA	NA	NA	NA
5363	COBS11047	396.576	2.39272	0.674101	3.79488	0.000147713	0.00762743	UP	IPR042235	Zona pellucida, ZP-C domain	-	NA	NA	NA	NA
6009	COBS13059	2333.68	2.39151	0.491457	4.86617	1.14e-06	0.000157541	UP	-	-		PTHR48043,PTHR48043:SF10	EG:EG0003.4 PROTEIN-RELATED,EG:EG0003.4 PROTEIN-RELATED	K00699	glucuronosyltransferase [EC:2.4.1.17]
6010	COBS13059	2333.68	2.39151	0.491457	4.86617	1.14e-06	0.000157541	UP	IPR002213	UDP-glucuronosyl/UDP-glucosyltransferase	GO:0008194	NA	NA	K00699	glucuronosyltransferase [EC:2.4.1.17]
5876	COBS12498	382.36	2.29254	0.234428	9.33516	1.01e-20	6.86e-18	UP	-	-		PTHR11012	UNCHARACTERIZED	NA	NA
5877	COBS12498	382.36	2.29254	0.234428	9.33516	1.01e-20	6.86e-18	UP	IPR015897	CHK kinase-like	-	NA	NA	NA	NA
5878	COBS12498	382.36	2.29254	0.234428	9.33516	1.01e-20	6.86e-18	UP	IPR004119	Ecdysteroid kinase-like	-	NA	NA	NA	NA
5879	COBS12498	382.36	2.29254	0.234428	9.33516	1.01e-20	6.86e-18	UP	IPR011009	Protein kinase-like domain superfamily	-	NA	NA	NA	NA
5034	COBS10595	2703.05	2.24843	0.389479	5.86224	4.57e-09	1.07e-06	UP	IPR036396	Cytochrome P450 superfamily	GO:0004497|GO:0005506|GO:0016705|GO:0020037	NA	NA	NA	NA
5035	COBS10595	2703.05	2.24843	0.389479	5.86224	4.57e-09	1.07e-06	UP	IPR002403	Cytochrome P450, E-class, group IV	GO:0004497|GO:0005506|GO:0016705|GO:0020037	NA	NA	NA	NA
5036	COBS10595	2703.05	2.24843	0.389479	5.86224	4.57e-09	1.07e-06	UP	IPR001128	Cytochrome P450	GO:0004497|GO:0005506|GO:0016705|GO:0020037	NA	NA	K24554	protein KIAA0825
5038	COBS10595	2703.05	2.24843	0.389479	5.86224	4.57e-09	1.07e-06	UP	IPR002401	Cytochrome P450, E-class, group I	GO:0004497|GO:0005506|GO:0016705|GO:0020037	NA	NA	K14999	cytochrome P450 family 6 [EC:1.14.-.-]
5039	COBS10595	2703.05	2.24843	0.389479	5.86224	4.57e-09	1.07e-06	UP	-	-		PTHR24292,PTHR24292:SF95	CYTOCHROME P450,CYP6A16, ISOFORM B-RELATED	NA	NA
5040	COBS10595	2703.05	2.24843	0.389479	5.86224	4.57e-09	1.07e-06	UP	-	-		PTHR24292,PTHR24292:SF95	CYTOCHROME P450,CYP6A16, ISOFORM B-RELATED	K24554	protein KIAA0825
5041	COBS10595	2703.05	2.24843	0.389479	5.86224	4.57e-09	1.07e-06	UP	IPR017972	Cytochrome P450, conserved site	GO:0005506|GO:0016705	NA	NA	NA	NA
5042	COBS10595	2703.05	2.24843	0.389479	5.86224	4.57e-09	1.07e-06	UP	IPR001128	Cytochrome P450	GO:0004497|GO:0005506|GO:0016705|GO:0020037	NA	NA	NA	NA
5044	COBS10595	2703.05	2.24843	0.389479	5.86224	4.57e-09	1.07e-06	UP	IPR017972	Cytochrome P450, conserved site	GO:0005506|GO:0016705	NA	NA	K14999	cytochrome P450 family 6 [EC:1.14.-.-]
5045	COBS10595	2703.05	2.24843	0.389479	5.86224	4.57e-09	1.07e-06	UP	IPR036396	Cytochrome P450 superfamily	GO:0004497|GO:0005506|GO:0016705|GO:0020037	NA	NA	K14999	cytochrome P450 family 6 [EC:1.14.-.-]
5046	COBS10595	2703.05	2.24843	0.389479	5.86224	4.57e-09	1.07e-06	UP	-	-		PTHR24292,PTHR24292:SF95	CYTOCHROME P450,CYP6A16, ISOFORM B-RELATED	K14999	cytochrome P450 family 6 [EC:1.14.-.-]
5047	COBS10595	2703.05	2.24843	0.389479	5.86224	4.57e-09	1.07e-06	UP	IPR002402	Cytochrome P450, E-class, group II	GO:0004497|GO:0005506|GO:0016705|GO:0020037	NA	NA	K14999	cytochrome P450 family 6 [EC:1.14.-.-]
5048	COBS10595	2703.05	2.24843	0.389479	5.86224	4.57e-09	1.07e-06	UP	-	-		PTHR24292	CYTOCHROME P450	NA	NA
5050	COBS10595	2703.05	2.24843	0.389479	5.86224	4.57e-09	1.07e-06	UP	IPR002401	Cytochrome P450, E-class, group I	GO:0004497|GO:0005506|GO:0016705|GO:0020037	NA	NA	K24554	protein KIAA0825
5052	COBS10595	2703.05	2.24843	0.389479	5.86224	4.57e-09	1.07e-06	UP	-	-		PTHR24292:SF95,PTHR24292	CYP6A16, ISOFORM B-RELATED,CYTOCHROME P450	NA	NA
5053	COBS10595	2703.05	2.24843	0.389479	5.86224	4.57e-09	1.07e-06	UP	IPR001128	Cytochrome P450	GO:0004497|GO:0005506|GO:0016705|GO:0020037	NA	NA	K14999	cytochrome P450 family 6 [EC:1.14.-.-]
5054	COBS10595	2703.05	2.24843	0.389479	5.86224	4.57e-09	1.07e-06	UP	IPR036396	Cytochrome P450 superfamily	GO:0004497|GO:0005506|GO:0016705|GO:0020037	NA	NA	K24554	protein KIAA0825
5056	COBS10595	2703.05	2.24843	0.389479	5.86224	4.57e-09	1.07e-06	UP	IPR017972	Cytochrome P450, conserved site	GO:0005506|GO:0016705	NA	NA	K24554	protein KIAA0825
5069	COBS10595	2703.05	2.24843	0.389479	5.86224	4.57e-09	1.07e-06	UP	IPR002402	Cytochrome P450, E-class, group II	GO:0004497|GO:0005506|GO:0016705|GO:0020037	NA	NA	K24554	protein KIAA0825
5082	COBS10595	2703.05	2.24843	0.389479	5.86224	4.57e-09	1.07e-06	UP	IPR002401	Cytochrome P450, E-class, group I	GO:0004497|GO:0005506|GO:0016705|GO:0020037	NA	NA	NA	NA
5090	COBS10595	2703.05	2.24843	0.389479	5.86224	4.57e-09	1.07e-06	UP	-	-		PTHR24292:SF95,PTHR24292	CYP6A16, ISOFORM B-RELATED,CYTOCHROME P450	K24554	protein KIAA0825
5101	COBS10595	2703.05	2.24843	0.389479	5.86224	4.57e-09	1.07e-06	UP	-	-		PTHR24292	CYTOCHROME P450	K24554	protein KIAA0825
5103	COBS10595	2703.05	2.24843	0.389479	5.86224	4.57e-09	1.07e-06	UP	-	-		PTHR24292:SF95,PTHR24292	CYP6A16, ISOFORM B-RELATED,CYTOCHROME P450	K14999	cytochrome P450 family 6 [EC:1.14.-.-]
5111	COBS10595	2703.05	2.24843	0.389479	5.86224	4.57e-09	1.07e-06	UP	IPR002402	Cytochrome P450, E-class, group II	GO:0004497|GO:0005506|GO:0016705|GO:0020037	NA	NA	NA	NA
4533	COBS09406	4916.73	2.24478	0.338618	6.70308	2.04e-11	5.7e-09	UP	-	-		PTHR21661:SF35,PTHR21661	EPOXIDE HYDROLASE,EPOXIDE HYDROLASE 1-RELATED	K10719	juvenile hormone epoxide hydrolase
4534	COBS09406	4916.73	2.24478	0.338618	6.70308	2.04e-11	5.7e-09	UP	IPR016292	Epoxide hydrolase	GO:0016803	NA	NA	K10719	juvenile hormone epoxide hydrolase
4535	COBS09406	4916.73	2.24478	0.338618	6.70308	2.04e-11	5.7e-09	UP	IPR000639	Epoxide hydrolase-like	GO:0003824	NA	NA	K10719	juvenile hormone epoxide hydrolase
4536	COBS09406	4916.73	2.24478	0.338618	6.70308	2.04e-11	5.7e-09	UP	IPR000073	Alpha/beta hydrolase fold-1	-	NA	NA	K10719	juvenile hormone epoxide hydrolase
4539	COBS09406	4916.73	2.24478	0.338618	6.70308	2.04e-11	5.7e-09	UP	IPR029058	Alpha/Beta hydrolase fold	-	NA	NA	K10719	juvenile hormone epoxide hydrolase
4541	COBS09406	4916.73	2.24478	0.338618	6.70308	2.04e-11	5.7e-09	UP	IPR010497	Epoxide hydrolase, N-terminal	-	NA	NA	K10719	juvenile hormone epoxide hydrolase
4544	COBS09406	4916.73	2.24478	0.338618	6.70308	2.04e-11	5.7e-09	UP	-	-		PTHR21661,PTHR21661:SF35	EPOXIDE HYDROLASE 1-RELATED,EPOXIDE HYDROLASE	K10719	juvenile hormone epoxide hydrolase
3656	COBS07891	759.855	2.1582	0.444514	5.34564	9.01e-08	1.65e-05	UP	-	-		NA	NA	NA	NA
3782	COBS08241	5233.4	2.08649	0.315226	7.12527	1.04e-12	3.39e-10	UP	IPR045357	Aminopeptidase N-like , N-terminal domain	-	NA	NA	NA	NA
3783	COBS08241	5233.4	2.08649	0.315226	7.12527	1.04e-12	3.39e-10	UP	IPR033581	Aminopeptidase N-like	-	PTHR11533:SF246	AMINOPEPTIDASE	NA	NA
3787	COBS08241	5233.4	2.08649	0.315226	7.12527	1.04e-12	3.39e-10	UP	IPR001930	Peptidase M1, alanine aminopeptidase/leukotriene A4 hydrolase	GO:0006508	NA	NA	NA	NA
3788	COBS08241	5233.4	2.08649	0.315226	7.12527	1.04e-12	3.39e-10	UP	-	-		PTHR11533	PROTEASE M1 ZINC METALLOPROTEASE	NA	NA
3789	COBS08241	5233.4	2.08649	0.315226	7.12527	1.04e-12	3.39e-10	UP	IPR014782	Peptidase M1, membrane alanine aminopeptidase	GO:0008237|GO:0008270	NA	NA	NA	NA
3790	COBS08241	5233.4	2.08649	0.315226	7.12527	1.04e-12	3.39e-10	UP	IPR034016	Aminopeptidase N-type	-	NA	NA	NA	NA
3791	COBS08241	5233.4	2.08649	0.315226	7.12527	1.04e-12	3.39e-10	UP	IPR027268	Peptidase M4/M1, CTD superfamily	-	NA	NA	NA	NA
3797	COBS08241	5233.4	2.08649	0.315226	7.12527	1.04e-12	3.39e-10	UP	-	-		PTHR11533	PROTEASE M1 ZINC METALLOPROTEASE	K11140	aminopeptidase N [EC:3.4.11.2]
3799	COBS08241	5233.4	2.08649	0.315226	7.12527	1.04e-12	3.39e-10	UP	IPR024571	ERAP1-like C-terminal domain	-	NA	NA	NA	NA
3800	COBS08241	5233.4	2.08649	0.315226	7.12527	1.04e-12	3.39e-10	UP	IPR034016	Aminopeptidase N-type	-	NA	NA	K11140	aminopeptidase N [EC:3.4.11.2]
3802	COBS08241	5233.4	2.08649	0.315226	7.12527	1.04e-12	3.39e-10	UP	IPR042097	Aminopeptidase N-like , N-terminal domain superfamliy	-	NA	NA	NA	NA
3806	COBS08241	5233.4	2.08649	0.315226	7.12527	1.04e-12	3.39e-10	UP	IPR024571	ERAP1-like C-terminal domain	-	NA	NA	K11140	aminopeptidase N [EC:3.4.11.2]
3807	COBS08241	5233.4	2.08649	0.315226	7.12527	1.04e-12	3.39e-10	UP	IPR033581	Aminopeptidase N-like	-	PTHR11533:SF246	AMINOPEPTIDASE	K11140	aminopeptidase N [EC:3.4.11.2]
3809	COBS08241	5233.4	2.08649	0.315226	7.12527	1.04e-12	3.39e-10	UP	IPR001930	Peptidase M1, alanine aminopeptidase/leukotriene A4 hydrolase	GO:0006508	NA	NA	K11140	aminopeptidase N [EC:3.4.11.2]
3810	COBS08241	5233.4	2.08649	0.315226	7.12527	1.04e-12	3.39e-10	UP	IPR027268	Peptidase M4/M1, CTD superfamily	-	NA	NA	K11140	aminopeptidase N [EC:3.4.11.2]
3811	COBS08241	5233.4	2.08649	0.315226	7.12527	1.04e-12	3.39e-10	UP	IPR045357	Aminopeptidase N-like , N-terminal domain	-	NA	NA	K11140	aminopeptidase N [EC:3.4.11.2]
3831	COBS08241	5233.4	2.08649	0.315226	7.12527	1.04e-12	3.39e-10	UP	IPR042097	Aminopeptidase N-like , N-terminal domain superfamliy	-	NA	NA	K11140	aminopeptidase N [EC:3.4.11.2]
3841	COBS08241	5233.4	2.08649	0.315226	7.12527	1.04e-12	3.39e-10	UP	IPR014782	Peptidase M1, membrane alanine aminopeptidase	GO:0008237|GO:0008270	NA	NA	K11140	aminopeptidase N [EC:3.4.11.2]
7708	COBS17827	17720.5	2.07127	0.802365	3.09251	0.00198469	0.0437185	UP	IPR013780	Glycosyl hydrolase, all-beta	-	NA	NA	NA	NA
7709	COBS17827	17720.5	2.07127	0.802365	3.09251	0.00198469	0.0437185	UP	IPR006046	Alpha amylase	GO:0004556|GO:0005975|GO:0043169	NA	NA	NA	NA
7710	COBS17827	17720.5	2.07127	0.802365	3.09251	0.00198469	0.0437185	UP	IPR031319	Alpha-amylase, C-terminal domain	-	NA	NA	NA	NA
7712	COBS17827	17720.5	2.07127	0.802365	3.09251	0.00198469	0.0437185	UP	IPR006047	Glycosyl hydrolase, family 13, catalytic domain	GO:0005975	NA	NA	NA	NA
7713	COBS17827	17720.5	2.07127	0.802365	3.09251	0.00198469	0.0437185	UP	-	-		PTHR43447:SF7,PTHR43447	ALPHA-AMYLASE,ALPHA-AMYLASE	NA	NA
7714	COBS17827	17720.5	2.07127	0.802365	3.09251	0.00198469	0.0437185	UP	IPR017853	Glycoside hydrolase superfamily	-	NA	NA	NA	NA
7715	COBS17827	17720.5	2.07127	0.802365	3.09251	0.00198469	0.0437185	UP	IPR006048	Alpha-amylase/branching enzyme, C-terminal all beta	GO:0003824|GO:0005975|GO:0043169	NA	NA	NA	NA
7681	COBS17609	614.865	2.06393	0.318998	6.88671	5.71e-12	1.65e-09	UP	IPR000073	Alpha/beta hydrolase fold-1	-	NA	NA	K22369	epoxide hydrolase 4 [EC:3.3.-.-]
7682	COBS17609	614.865	2.06393	0.318998	6.88671	5.71e-12	1.65e-09	UP	IPR000639	Epoxide hydrolase-like	GO:0003824	NA	NA	K22369	epoxide hydrolase 4 [EC:3.3.-.-]
7683	COBS17609	614.865	2.06393	0.318998	6.88671	5.71e-12	1.65e-09	UP	IPR029058	Alpha/Beta hydrolase fold	-	NA	NA	K22369	epoxide hydrolase 4 [EC:3.3.-.-]
7684	COBS17609	614.865	2.06393	0.318998	6.88671	5.71e-12	1.65e-09	UP	-	-		PTHR43329:SF17,PTHR43329	EPOXIDE HYDROLASE 1,EPOXIDE HYDROLASE	K22369	epoxide hydrolase 4 [EC:3.3.-.-]
1135	COBS03112	7590.97	2.04341	0.612014	3.92394	8.71e-05	0.00526236	UP	IPR010009	Apolipophorin-III	GO:0005576|GO:0006869|GO:0008289	NA	NA	NA	NA
1136	COBS03112	7590.97	2.04341	0.612014	3.92394	8.71e-05	0.00526236	UP	-	-		NA	NA	NA	NA
1222	COBS03330	592.305	2.02174	0.330901	5.75774	8.52e-09	1.9e-06	UP	-	-		PTHR11559,PTHR11559:SF185	CARBOXYLESTERASE,GH04232P	NA	NA
1223	COBS03330	592.305	2.02174	0.330901	5.75774	8.52e-09	1.9e-06	UP	IPR002018	Carboxylesterase, type B	-	NA	NA	NA	NA
1224	COBS03330	592.305	2.02174	0.330901	5.75774	8.52e-09	1.9e-06	UP	IPR019819	Carboxylesterase type B, conserved site	-	NA	NA	NA	NA
1225	COBS03330	592.305	2.02174	0.330901	5.75774	8.52e-09	1.9e-06	UP	IPR029058	Alpha/Beta hydrolase fold	-	NA	NA	NA	NA
6175	COBS14083	134.261	2.00597	0.776587	3.13903	0.00169505	0.0397614	UP	IPR036179	Immunoglobulin-like domain superfamily	-	NA	NA	NA	NA
6176	COBS14083	134.261	2.00597	0.776587	3.13903	0.00169505	0.0397614	UP	IPR002350	Kazal domain	GO:0005515	NA	NA	NA	NA
6177	COBS14083	134.261	2.00597	0.776587	3.13903	0.00169505	0.0397614	UP	IPR007110	Immunoglobulin-like domain	-	NA	NA	NA	NA
6178	COBS14083	134.261	2.00597	0.776587	3.13903	0.00169505	0.0397614	UP	IPR013098	Immunoglobulin I-set	-	NA	NA	NA	NA
6179	COBS14083	134.261	2.00597	0.776587	3.13903	0.00169505	0.0397614	UP	IPR013783	Immunoglobulin-like fold	-	NA	NA	NA	NA
6180	COBS14083	134.261	2.00597	0.776587	3.13903	0.00169505	0.0397614	UP	-	-		PTHR14186:SF19	KAZAL-TYPE SERINE PROTEASE INHIBITOR DOMAIN CONTAINING PROTEIN	NA	NA
6181	COBS14083	134.261	2.00597	0.776587	3.13903	0.00169505	0.0397614	UP	IPR009030	Growth factor receptor cysteine-rich domain superfamily	-	NA	NA	NA	NA
6182	COBS14083	134.261	2.00597	0.776587	3.13903	0.00169505	0.0397614	UP	IPR011390	Insulin-like growth factor binding protein-related protein (IGFBP-rP), MAC25	GO:0001558|GO:0005520|GO:0005576	PTHR14186	INSULIN-LIKE GROWTH FACTOR BINDING PROTEIN-RELATED	NA	NA
6183	COBS14083	134.261	2.00597	0.776587	3.13903	0.00169505	0.0397614	UP	IPR003599	Immunoglobulin subtype	-	NA	NA	NA	NA
6184	COBS14083	134.261	2.00597	0.776587	3.13903	0.00169505	0.0397614	UP	IPR036058	Kazal domain superfamily	GO:0005515	NA	NA	NA	NA
1132	COBS03044	790.715	1.9685	0.346859	5.3449	9.05e-08	1.65e-05	UP	-	-		PTHR46953:SF1,PTHR46953	G-PROTEIN COUPLED RECEPTOR MTH-LIKE 1-RELATED,G-PROTEIN COUPLED RECEPTOR MTH-LIKE 1-RELATED	K04599	G protein-coupled receptor Mth (Methuselah protein)
1133	COBS03044	790.715	1.9685	0.346859	5.3449	9.05e-08	1.65e-05	UP	IPR000832	GPCR, family 2, secretin-like	GO:0004930|GO:0007186|GO:0016021	NA	NA	K04599	G protein-coupled receptor Mth (Methuselah protein)
1134	COBS03044	790.715	1.9685	0.346859	5.3449	9.05e-08	1.65e-05	UP	IPR017981	GPCR, family 2-like	GO:0004888|GO:0007166|GO:0016021	NA	NA	K04599	G protein-coupled receptor Mth (Methuselah protein)
7304	COBS15913	1925.92	1.91121	0.495246	3.5485	0.000387432	0.0146419	UP	-	-		PTHR43272:SF32,PTHR43272	LONG-CHAIN-FATTY-ACID--COA LIGASE ACSBG2,LONG-CHAIN-FATTY-ACID--COA LIGASE	K15013	long-chain-fatty-acid--CoA ligase ACSBG [EC:6.2.1.3]
7305	COBS15913	1925.92	1.91121	0.495246	3.5485	0.000387432	0.0146419	UP	IPR000873	AMP-dependent synthetase/ligase	-	NA	NA	K15013	long-chain-fatty-acid--CoA ligase ACSBG [EC:6.2.1.3]
7306	COBS15913	1925.92	1.91121	0.495246	3.5485	0.000387432	0.0146419	UP	IPR042099	ANL, N-terminal domain	-	NA	NA	K15013	long-chain-fatty-acid--CoA ligase ACSBG [EC:6.2.1.3]
7309	COBS15913	1925.92	1.91121	0.495246	3.5485	0.000387432	0.0146419	UP	-	-		PTHR43272,PTHR43272:SF32	LONG-CHAIN-FATTY-ACID--COA LIGASE,LONG-CHAIN-FATTY-ACID--COA LIGASE ACSBG2	K15013	long-chain-fatty-acid--CoA ligase ACSBG [EC:6.2.1.3]
5002	COBS10397	482.834	1.87761	0.348374	5.16795	2.37e-07	3.98e-05	UP	IPR002347	Short-chain dehydrogenase/reductase SDR	-	NA	NA	NA	NA
5003	COBS10397	482.834	1.87761	0.348374	5.16795	2.37e-07	3.98e-05	UP	-	-		PTHR24320:SF233,PTHR24320	CARBONYL REDUCTASE, ISOFORM A,RETINOL DEHYDROGENASE	NA	NA
5004	COBS10397	482.834	1.87761	0.348374	5.16795	2.37e-07	3.98e-05	UP	IPR036291	NAD(P)-binding domain superfamily	-	NA	NA	NA	NA
5758	COBS12101	6340.08	1.84116	0.503496	3.53775	0.000403552	0.0150779	UP	-	-		PTHR11431:SF51	FERRITIN	NA	NA
5759	COBS12101	6340.08	1.84116	0.503496	3.53775	0.000403552	0.0150779	UP	IPR009078	Ferritin-like superfamily	-	NA	NA	NA	NA
5760	COBS12101	6340.08	1.84116	0.503496	3.53775	0.000403552	0.0150779	UP	IPR012347	Ferritin-like	-	NA	NA	NA	NA
5761	COBS12101	6340.08	1.84116	0.503496	3.53775	0.000403552	0.0150779	UP	IPR008331	Ferritin/DPS protein domain	GO:0008199	NA	NA	NA	NA
5762	COBS12101	6340.08	1.84116	0.503496	3.53775	0.000403552	0.0150779	UP	IPR009040	Ferritin-like diiron domain	-	NA	NA	NA	NA
5763	COBS12101	6340.08	1.84116	0.503496	3.53775	0.000403552	0.0150779	UP	IPR001519	Ferritin	GO:0006826|GO:0006879|GO:0008199	PTHR11431	FERRITIN	NA	NA
800	COBS02317	1477.15	1.83964	0.435258	4.48046	7.45e-06	0.000761671	UP	IPR003591	Leucine-rich repeat, typical subtype	-	NA	NA	NA	NA
801	COBS02317	1477.15	1.83964	0.435258	4.48046	7.45e-06	0.000761671	UP	IPR032675	Leucine-rich repeat domain superfamily	-	NA	NA	NA	NA
802	COBS02317	1477.15	1.83964	0.435258	4.48046	7.45e-06	0.000761671	UP	IPR001611	Leucine-rich repeat	GO:0005515	NA	NA	NA	NA
803	COBS02317	1477.15	1.83964	0.435258	4.48046	7.45e-06	0.000761671	UP	-	-		PTHR24373:SF275,PTHR24373	CD180 ANTIGEN,SLIT RELATED LEUCINE-RICH REPEAT NEURONAL PROTEIN	NA	NA
7628	COBS17394	3384.23	1.83961	0.527271	3.1555	0.00160224	0.0380982	UP	IPR041985	Ribosomal protein L14, KOW motif	-	NA	NA	K02875	large subunit ribosomal protein L14e
7629	COBS17394	3384.23	1.83961	0.527271	3.1555	0.00160224	0.0380982	UP	-	-		PTHR11127:SF2	60S RIBOSOMAL PROTEIN L14	K02875	large subunit ribosomal protein L14e
7630	COBS17394	3384.23	1.83961	0.527271	3.1555	0.00160224	0.0380982	UP	IPR008991	Translation protein SH3-like domain superfamily	-	NA	NA	K02875	large subunit ribosomal protein L14e
7632	COBS17394	3384.23	1.83961	0.527271	3.1555	0.00160224	0.0380982	UP	IPR014722	Ribosomal protein L2, domain 2	-	NA	NA	K02875	large subunit ribosomal protein L14e
7633	COBS17394	3384.23	1.83961	0.527271	3.1555	0.00160224	0.0380982	UP	IPR002784	Ribosomal protein L14e domain	GO:0003735|GO:0005840|GO:0006412	NA	NA	K02875	large subunit ribosomal protein L14e
7635	COBS17394	3384.23	1.83961	0.527271	3.1555	0.00160224	0.0380982	UP	IPR039660	Ribosomal protein L14	GO:0003723|GO:0003735	PTHR11127	60S RIBOSOMAL PROTEIN L14	K02875	large subunit ribosomal protein L14e
588	COBS01720	40956.3	1.7906	0.465094	4.09454	4.23e-05	0.00296793	UP	-	-		PTHR43053:SF4,PTHR43053	MYOGENESIS-REGULATING GLYCOSIDASE,GLYCOSIDASE FAMILY 31	K24727	myogenesis-regulating glycosidase [EC:3.2.1.-]
590	COBS01720	40956.3	1.7906	0.465094	4.09454	4.23e-05	0.00296793	UP	IPR013780	Glycosyl hydrolase, all-beta	-	NA	NA	K24727	myogenesis-regulating glycosidase [EC:3.2.1.-]
591	COBS01720	40956.3	1.7906	0.465094	4.09454	4.23e-05	0.00296793	UP	IPR017853	Glycoside hydrolase superfamily	-	NA	NA	K24727	myogenesis-regulating glycosidase [EC:3.2.1.-]
593	COBS01720	40956.3	1.7906	0.465094	4.09454	4.23e-05	0.00296793	UP	IPR000322	Glycoside hydrolase family 31	GO:0004553|GO:0005975	NA	NA	K24727	myogenesis-regulating glycosidase [EC:3.2.1.-]
596	COBS01720	40956.3	1.7906	0.465094	4.09454	4.23e-05	0.00296793	UP	-	-		PTHR43053,PTHR43053:SF4	GLYCOSIDASE FAMILY 31,MYOGENESIS-REGULATING GLYCOSIDASE	K24727	myogenesis-regulating glycosidase [EC:3.2.1.-]
6429	COBS14809	1032.57	1.78934	0.38027	4.13164	3.6e-05	0.0026457	UP	IPR020846	Major facilitator superfamily domain	GO:0022857	NA	NA	NA	NA
6430	COBS14809	1032.57	1.78934	0.38027	4.13164	3.6e-05	0.0026457	UP	IPR003663	Sugar/inositol transporter	GO:0016020|GO:0022857|GO:0055085	NA	NA	NA	NA
6431	COBS14809	1032.57	1.78934	0.38027	4.13164	3.6e-05	0.0026457	UP	IPR036259	MFS transporter superfamily	-	NA	NA	NA	NA
6432	COBS14809	1032.57	1.78934	0.38027	4.13164	3.6e-05	0.0026457	UP	-	-		PTHR48021:SF46,PTHR48021	FACILITATED TREHALOSE TRANSPORTER TRET1-2 HOMOLOG-LIKE PROTEIN,-	NA	NA
6433	COBS14809	1032.57	1.78934	0.38027	4.13164	3.6e-05	0.0026457	UP	IPR005828	Major facilitator, sugar transporter-like	GO:0016021|GO:0022857|GO:0055085	NA	NA	NA	NA
6434	COBS14809	1032.57	1.78934	0.38027	4.13164	3.6e-05	0.0026457	UP	IPR005829	Sugar transporter, conserved site	GO:0016021|GO:0022857|GO:0055085	NA	NA	NA	NA
2595	COBS05626	2518.93	1.76092	0.318179	5.22234	1.77e-07	3.07e-05	UP	IPR003439	ABC transporter-like, ATP-binding domain	GO:0005524	NA	NA	K05673	ATP-binding cassette, subfamily C (CFTR/MRP), member 4
2596	COBS05626	2518.93	1.76092	0.318179	5.22234	1.77e-07	3.07e-05	UP	IPR003593	AAA+ ATPase domain	-	NA	NA	K05673	ATP-binding cassette, subfamily C (CFTR/MRP), member 4
2597	COBS05626	2518.93	1.76092	0.318179	5.22234	1.77e-07	3.07e-05	UP	IPR036640	ABC transporter type 1, transmembrane domain superfamily	GO:0005524|GO:0016021	NA	NA	K05673	ATP-binding cassette, subfamily C (CFTR/MRP), member 4
2598	COBS05626	2518.93	1.76092	0.318179	5.22234	1.77e-07	3.07e-05	UP	IPR044746	ABC transporter C family, six-transmembrane helical domain 1	GO:0140359	NA	NA	K05673	ATP-binding cassette, subfamily C (CFTR/MRP), member 4
2599	COBS05626	2518.93	1.76092	0.318179	5.22234	1.77e-07	3.07e-05	UP	-	-		PTHR24223:SF360,PTHR24223	MULTIDRUG RESISTANCE-ASSOCIATED PROTEIN LETHAL(2)03659-LIKE PROTEIN-RELATED,ATP-BINDING CASSETTE SUB-FAMILY C	K05673	ATP-binding cassette, subfamily C (CFTR/MRP), member 4
2600	COBS05626	2518.93	1.76092	0.318179	5.22234	1.77e-07	3.07e-05	UP	IPR011527	ABC transporter type 1, transmembrane domain	GO:0005524|GO:0016021|GO:0055085|GO:0140359	NA	NA	K05673	ATP-binding cassette, subfamily C (CFTR/MRP), member 4
2602	COBS05626	2518.93	1.76092	0.318179	5.22234	1.77e-07	3.07e-05	UP	IPR017871	ABC transporter-like, conserved site	GO:0005524	NA	NA	K05673	ATP-binding cassette, subfamily C (CFTR/MRP), member 4
2606	COBS05626	2518.93	1.76092	0.318179	5.22234	1.77e-07	3.07e-05	UP	IPR027417	P-loop containing nucleoside triphosphate hydrolase	-	NA	NA	K05673	ATP-binding cassette, subfamily C (CFTR/MRP), member 4
2618	COBS05626	2518.93	1.76092	0.318179	5.22234	1.77e-07	3.07e-05	UP	-	-		PTHR24223:SF334,PTHR24223	FI20190P1,ATP-BINDING CASSETTE SUB-FAMILY C	K05673	ATP-binding cassette, subfamily C (CFTR/MRP), member 4
2631	COBS05626	2518.93	1.76092	0.318179	5.22234	1.77e-07	3.07e-05	UP	-	-		PTHR24223,PTHR24223:SF334	ATP-BINDING CASSETTE SUB-FAMILY C,FI20190P1	K05673	ATP-binding cassette, subfamily C (CFTR/MRP), member 4
2641	COBS05626	2518.93	1.76092	0.318179	5.22234	1.77e-07	3.07e-05	UP	-	-		PTHR24223,PTHR24223:SF360	ATP-BINDING CASSETTE SUB-FAMILY C,MULTIDRUG RESISTANCE-ASSOCIATED PROTEIN LETHAL(2)03659-LIKE PROTEIN-RELATED	K05673	ATP-binding cassette, subfamily C (CFTR/MRP), member 4
5680	COBS11584	1824.88	1.75105	0.481219	4.31621	1.59e-05	0.00133525	UP	IPR036291	NAD(P)-binding domain superfamily	-	NA	NA	K00069	15-hydroxyprostaglandin dehydrogenase (NAD) [EC:1.1.1.141]
5681	COBS11584	1824.88	1.75105	0.481219	4.31621	1.59e-05	0.00133525	UP	IPR002347	Short-chain dehydrogenase/reductase SDR	-	NA	NA	K00069	15-hydroxyprostaglandin dehydrogenase (NAD) [EC:1.1.1.141]
5682	COBS11584	1824.88	1.75105	0.481219	4.31621	1.59e-05	0.00133525	UP	IPR020904	Short-chain dehydrogenase/reductase, conserved site	GO:0016491	NA	NA	K00069	15-hydroxyprostaglandin dehydrogenase (NAD) [EC:1.1.1.141]
5684	COBS11584	1824.88	1.75105	0.481219	4.31621	1.59e-05	0.00133525	UP	-	-		PTHR44229	15-HYDROXYPROSTAGLANDIN DEHYDROGENASE [NAD(+)]	K00069	15-hydroxyprostaglandin dehydrogenase (NAD) [EC:1.1.1.141]
5686	COBS11584	1824.88	1.75105	0.481219	4.31621	1.59e-05	0.00133525	UP	-	-		PTHR44229:SF4,PTHR44229	15-HYDROXYPROSTAGLANDIN DEHYDROGENASE [NAD(+)],15-HYDROXYPROSTAGLANDIN DEHYDROGENASE [NAD(+)]	K00069	15-hydroxyprostaglandin dehydrogenase (NAD) [EC:1.1.1.141]
5687	COBS11584	1824.88	1.75105	0.481219	4.31621	1.59e-05	0.00133525	UP	-	-		PTHR44229,PTHR44229:SF4	15-HYDROXYPROSTAGLANDIN DEHYDROGENASE [NAD(+)],15-HYDROXYPROSTAGLANDIN DEHYDROGENASE [NAD(+)]	K00069	15-hydroxyprostaglandin dehydrogenase (NAD) [EC:1.1.1.141]
1129	COBS03039	4655.1	1.72991	0.312266	5.43748	5.4e-08	1.02e-05	UP	-	-		PTHR10426:SF99,PTHR10426	FI18644P1-RELATED,STRICTOSIDINE SYNTHASE-RELATED	K21407	adipocyte plasma membrane-associated protein
1130	COBS03039	4655.1	1.72991	0.312266	5.43748	5.4e-08	1.02e-05	UP	IPR018119	Strictosidine synthase, conserved region	GO:0009058|GO:0016844	NA	NA	K21407	adipocyte plasma membrane-associated protein
1131	COBS03039	4655.1	1.72991	0.312266	5.43748	5.4e-08	1.02e-05	UP	IPR011042	Six-bladed beta-propeller, TolB-like	-	NA	NA	K21407	adipocyte plasma membrane-associated protein
2857	COBS06312	1877.67	1.71708	0.5161	3.11188	0.00185901	0.0418506	UP	-	-		PTHR19970,PTHR19970:SF5	RIBOSOMAL PROTEIN L39E,60S RIBOSOMAL PROTEIN L39	K02924	large subunit ribosomal protein L39e
2858	COBS06312	1877.67	1.71708	0.5161	3.11188	0.00185901	0.0418506	UP	IPR023626	Ribosomal protein L39e domain superfamily	-	NA	NA	K02924	large subunit ribosomal protein L39e
2859	COBS06312	1877.67	1.71708	0.5161	3.11188	0.00185901	0.0418506	UP	IPR000077	Ribosomal protein L39e	GO:0003735|GO:0005840|GO:0006412	NA	NA	K02924	large subunit ribosomal protein L39e
2860	COBS06312	1877.67	1.71708	0.5161	3.11188	0.00185901	0.0418506	UP	IPR020083	Ribosomal protein L39e, conserved site	GO:0003735|GO:0005840|GO:0006412	NA	NA	K02924	large subunit ribosomal protein L39e
5508	COBS11400	966.708	1.67997	0.34132	4.48383	7.33e-06	0.000754665	UP	IPR002159	CD36 family	GO:0016020	PTHR11923	SCAVENGER RECEPTOR CLASS B TYPE-1 SR-B1	NA	NA
5510	COBS11400	966.708	1.67997	0.34132	4.48383	7.33e-06	0.000754665	UP	-	-		PTHR11923:SF100	FI07620P-RELATED	NA	NA
2017	COBS04642	897.474	1.67904	0.277181	6.16675	6.97e-10	1.7e-07	UP	IPR011037	Pyruvate kinase-like, insert domain superfamily	-	NA	NA	NA	NA
2018	COBS04642	897.474	1.67904	0.277181	6.16675	6.97e-10	1.7e-07	UP	IPR005303	MOSC, N-terminal beta barrel	-	NA	NA	NA	NA
2021	COBS04642	897.474	1.67904	0.277181	6.16675	6.97e-10	1.7e-07	UP	IPR005302	Molybdenum cofactor sulfurase, C-terminal	GO:0003824|GO:0030151|GO:0030170	NA	NA	NA	NA
2027	COBS04642	897.474	1.67904	0.277181	6.16675	6.97e-10	1.7e-07	UP	-	-		PTHR14237:SF25,PTHR14237	MITOCHONDRIAL AMIDOXIME-REDUCING COMPONENT 1,MOLYBDOPTERIN COFACTOR SULFURASE MOSC	NA	NA
2033	COBS04642	897.474	1.67904	0.277181	6.16675	6.97e-10	1.7e-07	UP	-	-		PTHR14237,PTHR14237:SF25	MOLYBDOPTERIN COFACTOR SULFURASE MOSC,MITOCHONDRIAL AMIDOXIME-REDUCING COMPONENT 1	NA	NA
6036	COBS13150	1474.04	1.67575	0.452577	4.10526	4.04e-05	0.00288533	UP	-	-		PTHR11923:SF50	GH19047P	NA	NA
6037	COBS13150	1474.04	1.67575	0.452577	4.10526	4.04e-05	0.00288533	UP	IPR002159	CD36 family	GO:0016020	PTHR11923	SCAVENGER RECEPTOR CLASS B TYPE-1 SR-B1	NA	NA
3388	COBS07066	423.538	1.66563	0.35536	4.93511	8.01e-07	0.000118242	UP	IPR032675	Leucine-rich repeat domain superfamily	-	NA	NA	NA	NA
3389	COBS07066	423.538	1.66563	0.35536	4.93511	8.01e-07	0.000118242	UP	IPR001611	Leucine-rich repeat	GO:0005515	NA	NA	NA	NA
3390	COBS07066	423.538	1.66563	0.35536	4.93511	8.01e-07	0.000118242	UP	-	-		PTHR45712	AGAP008170-PA	NA	NA
3391	COBS07066	423.538	1.66563	0.35536	4.93511	8.01e-07	0.000118242	UP	IPR003591	Leucine-rich repeat, typical subtype	-	NA	NA	NA	NA
7338	COBS16040	2189.27	1.6365	0.445869	3.26172	0.0011074	0.0297705	UP	IPR003591	Leucine-rich repeat, typical subtype	-	NA	NA	NA	NA
7339	COBS16040	2189.27	1.6365	0.445869	3.26172	0.0011074	0.0297705	UP	IPR032675	Leucine-rich repeat domain superfamily	-	NA	NA	NA	NA
7340	COBS16040	2189.27	1.6365	0.445869	3.26172	0.0011074	0.0297705	UP	IPR001611	Leucine-rich repeat	GO:0005515	NA	NA	NA	NA
7342	COBS16040	2189.27	1.6365	0.445869	3.26172	0.0011074	0.0297705	UP	-	-		PTHR24366,PTHR24366:SF80	IG(IMMUNOGLOBULIN) AND LRR(LEUCINE RICH REPEAT) DOMAINS,LD30178P	NA	NA
7348	COBS16040	2189.27	1.6365	0.445869	3.26172	0.0011074	0.0297705	UP	-	-		PTHR45617:SF88,PTHR45617	ASTROCYTIC LEUCINE-RICH REPEAT MOLECULE-RELATED,-	NA	NA
7349	COBS16040	2189.27	1.6365	0.445869	3.26172	0.0011074	0.0297705	UP	-	-		PTHR45617,PTHR45617:SF88	-,ASTROCYTIC LEUCINE-RICH REPEAT MOLECULE-RELATED	NA	NA
4792	COBS09730	773.758	1.63536	0.406927	4.5726	4.82e-06	0.000534516	UP	-	-		PTHR20854:SF25,PTHR20854	INOSITOL-1-MONOPHOSPHATASE,INOSITOL MONOPHOSPHATASE	K01092	myo-inositol-1(or 4)-monophosphatase [EC:3.1.3.25]
4793	COBS09730	773.758	1.63536	0.406927	4.5726	4.82e-06	0.000534516	UP	IPR020552	Inositol monophosphatase, lithium-sensitive	GO:0046854	NA	NA	K01092	myo-inositol-1(or 4)-monophosphatase [EC:3.1.3.25]
4794	COBS09730	773.758	1.63536	0.406927	4.5726	4.82e-06	0.000534516	UP	IPR020550	Inositol monophosphatase, conserved site	GO:0046854	NA	NA	K01092	myo-inositol-1(or 4)-monophosphatase [EC:3.1.3.25]
4795	COBS09730	773.758	1.63536	0.406927	4.5726	4.82e-06	0.000534516	UP	IPR000760	Inositol monophosphatase-like	GO:0046855	NA	NA	K01092	myo-inositol-1(or 4)-monophosphatase [EC:3.1.3.25]
4796	COBS09730	773.758	1.63536	0.406927	4.5726	4.82e-06	0.000534516	UP	IPR020583	Inositol monophosphatase, metal-binding site	-	NA	NA	K01092	myo-inositol-1(or 4)-monophosphatase [EC:3.1.3.25]
4797	COBS09730	773.758	1.63536	0.406927	4.5726	4.82e-06	0.000534516	UP	IPR033942	Inositol monophosphatase	GO:0008934|GO:0046855	NA	NA	K01092	myo-inositol-1(or 4)-monophosphatase [EC:3.1.3.25]
2717	COBS05950	796.959	1.61255	0.619563	3.30455	0.000951287	0.0269147	UP	IPR000560	Histidine phosphatase superfamily, clade-2	-	NA	NA	NA	NA
2718	COBS05950	796.959	1.61255	0.619563	3.30455	0.000951287	0.0269147	UP	IPR033379	Histidine acid phosphatase active site	-	NA	NA	NA	NA
2719	COBS05950	796.959	1.61255	0.619563	3.30455	0.000951287	0.0269147	UP	IPR029033	Histidine phosphatase superfamily	-	NA	NA	NA	NA
2720	COBS05950	796.959	1.61255	0.619563	3.30455	0.000951287	0.0269147	UP	-	-		PTHR11567	ACID PHOSPHATASE-RELATED	NA	NA
2721	COBS05950	796.959	1.61255	0.619563	3.30455	0.000951287	0.0269147	UP	IPR029630	Venom acid phosphatase Acph-1	GO:0003993	PTHR11567:SF183	GH28721P-RELATED	NA	NA
5620	COBS11541	848.41	1.61116	0.421792	4.68624	2.78e-06	0.000340134	UP	IPR002502	N-acetylmuramoyl-L-alanine amidase domain	GO:0008745|GO:0009253	NA	NA	NA	NA
5621	COBS11541	848.41	1.61116	0.421792	4.68624	2.78e-06	0.000340134	UP	IPR002502	N-acetylmuramoyl-L-alanine amidase domain	GO:0008745|GO:0009253	NA	NA	K01446	peptidoglycan recognition protein
5622	COBS11541	848.41	1.61116	0.421792	4.68624	2.78e-06	0.000340134	UP	IPR036505	N-acetylmuramoyl-L-alanine amidase/PGRP domain superfamily	GO:0008745|GO:0009253	NA	NA	K01446	peptidoglycan recognition protein
5623	COBS11541	848.41	1.61116	0.421792	4.68624	2.78e-06	0.000340134	UP	IPR006619	Peptidoglycan recognition protein family domain, metazoa/bacteria	GO:0008270|GO:0008745|GO:0009253	NA	NA	NA	NA
5624	COBS11541	848.41	1.61116	0.421792	4.68624	2.78e-06	0.000340134	UP	IPR006619	Peptidoglycan recognition protein family domain, metazoa/bacteria	GO:0008270|GO:0008745|GO:0009253	NA	NA	K01446	peptidoglycan recognition protein
5625	COBS11541	848.41	1.61116	0.421792	4.68624	2.78e-06	0.000340134	UP	IPR017331	Peptidoglycan recognition protein, PGRP-S	GO:0042834|GO:0045087	NA	NA	K01446	peptidoglycan recognition protein
5626	COBS11541	848.41	1.61116	0.421792	4.68624	2.78e-06	0.000340134	UP	IPR036505	N-acetylmuramoyl-L-alanine amidase/PGRP domain superfamily	GO:0008745|GO:0009253	NA	NA	NA	NA
5627	COBS11541	848.41	1.61116	0.421792	4.68624	2.78e-06	0.000340134	UP	IPR015510	Peptidoglycan recognition protein	-	PTHR11022	PEPTIDOGLYCAN RECOGNITION PROTEIN	K01446	peptidoglycan recognition protein
5631	COBS11541	848.41	1.61116	0.421792	4.68624	2.78e-06	0.000340134	UP	IPR015510	Peptidoglycan recognition protein	-	PTHR11022	PEPTIDOGLYCAN RECOGNITION PROTEIN	NA	NA
7478	COBS16451	315.539	1.60098	0.481973	3.05805	0.00222784	0.0466779	UP	IPR044890	TMEM14 superfamily	-	NA	NA	NA	NA
7479	COBS16451	315.539	1.60098	0.481973	3.05805	0.00222784	0.0466779	UP	-	-		PTHR12668:SF4	TRANSMEMBRANE PROTEIN 14C	NA	NA
7480	COBS16451	315.539	1.60098	0.481973	3.05805	0.00222784	0.0466779	UP	IPR005349	TMEM14 family	GO:0016020	PTHR12668	TRANSMEMBRANE PROTEIN 14, 15	NA	NA
5751	COBS12024	1847.01	1.58333	0.425868	3.80483	0.000141904	0.00745043	UP	-	-		PTHR15601:SF20	STRESS-ASSOCIATED ENDOPLASMIC RETICULUM PROTEIN 2	NA	NA
5752	COBS12024	1847.01	1.58333	0.425868	3.80483	0.000141904	0.00745043	UP	IPR010580	Stress-associated endoplasmic reticulum protein	GO:0005783	PTHR15601	STRESS ASSOCIATED ENDOPLASMIC RETICULUM PROTEIN SERP1/RAMP4	NA	NA
733	COBS01999	638.803	1.57004	0.377791	4.42797	9.51e-06	0.000924416	UP	IPR043504	Peptidase S1, PA clan, chymotrypsin-like fold	-	NA	NA	NA	NA
735	COBS01999	638.803	1.57004	0.377791	4.42797	9.51e-06	0.000924416	UP	-	-		PTHR24260:SF91,PTHR24260	FI18411P1-RELATED,-	NA	NA
736	COBS01999	638.803	1.57004	0.377791	4.42797	9.51e-06	0.000924416	UP	IPR009003	Peptidase S1, PA clan	-	NA	NA	NA	NA
737	COBS01999	638.803	1.57004	0.377791	4.42797	9.51e-06	0.000924416	UP	IPR001254	Serine proteases, trypsin domain	GO:0004252|GO:0006508	NA	NA	NA	NA
738	COBS01999	638.803	1.57004	0.377791	4.42797	9.51e-06	0.000924416	UP	IPR001314	Peptidase S1A, chymotrypsin family	GO:0004252|GO:0006508	NA	NA	NA	NA
739	COBS01999	638.803	1.57004	0.377791	4.42797	9.51e-06	0.000924416	UP	-	-		PTHR24260:SF107,PTHR24260	EG:BACR7A4.3 PROTEIN-RELATED,-	NA	NA
740	COBS01999	638.803	1.57004	0.377791	4.42797	9.51e-06	0.000924416	UP	IPR033116	Serine proteases, trypsin family, serine active site	-	NA	NA	NA	NA
741	COBS01999	638.803	1.57004	0.377791	4.42797	9.51e-06	0.000924416	UP	IPR018114	Serine proteases, trypsin family, histidine active site	GO:0004252|GO:0006508	NA	NA	NA	NA
5343	COBS10809	975.825	1.56509	0.515445	3.61846	0.000296364	0.0122995	UP	-	-		PTHR12588:SF0	INOSITOL OXYGENASE	K00469	inositol oxygenase [EC:1.13.99.1]
5344	COBS10809	975.825	1.56509	0.515445	3.61846	0.000296364	0.0122995	UP	IPR007828	Inositol oxygenase	GO:0005506|GO:0005737|GO:0019310|GO:0050113	PTHR12588	MYOINOSITOL OXYGENASE	K00469	inositol oxygenase [EC:1.13.99.1]
1660	COBS03780	11534.2	1.55707	0.538784	4.0925	4.27e-05	0.00298081	UP	-	-		NA	NA	NA	NA
1702	COBS04158	531.339	1.55191	0.364432	3.76271	0.000168081	0.00837515	UP	IPR000917	Sulfatase, N-terminal	GO:0008484	NA	NA	K01565	N-sulfoglucosamine sulfohydrolase [EC:3.10.1.1]
1703	COBS04158	531.339	1.55191	0.364432	3.76271	0.000168081	0.00837515	UP	IPR024607	Sulfatase, conserved site	-	NA	NA	K15029	translation initiation factor 3 subunit L
1704	COBS04158	531.339	1.55191	0.364432	3.76271	0.000168081	0.00837515	UP	IPR000917	Sulfatase, N-terminal	GO:0008484	NA	NA	K15029	translation initiation factor 3 subunit L
1707	COBS04158	531.339	1.55191	0.364432	3.76271	0.000168081	0.00837515	UP	IPR032506	N-sulphoglucosamine sulphohydrolase, C-terminal	-	NA	NA	K15029	translation initiation factor 3 subunit L
1708	COBS04158	531.339	1.55191	0.364432	3.76271	0.000168081	0.00837515	UP	IPR024607	Sulfatase, conserved site	-	NA	NA	K01565	N-sulfoglucosamine sulfohydrolase [EC:3.10.1.1]
1709	COBS04158	531.339	1.55191	0.364432	3.76271	0.000168081	0.00837515	UP	IPR017850	Alkaline-phosphatase-like, core domain superfamily	-	NA	NA	K01565	N-sulfoglucosamine sulfohydrolase [EC:3.10.1.1]
1711	COBS04158	531.339	1.55191	0.364432	3.76271	0.000168081	0.00837515	UP	-	-		PTHR43108:SF6,PTHR43108	N-SULPHOGLUCOSAMINE SULPHOHYDROLASE,N-ACETYLGLUCOSAMINE-6-SULFATASE FAMILY MEMBER	K01565	N-sulfoglucosamine sulfohydrolase [EC:3.10.1.1]
1715	COBS04158	531.339	1.55191	0.364432	3.76271	0.000168081	0.00837515	UP	IPR017850	Alkaline-phosphatase-like, core domain superfamily	-	NA	NA	K15029	translation initiation factor 3 subunit L
1716	COBS04158	531.339	1.55191	0.364432	3.76271	0.000168081	0.00837515	UP	-	-		PTHR43108,PTHR43108:SF6	N-ACETYLGLUCOSAMINE-6-SULFATASE FAMILY MEMBER,N-SULPHOGLUCOSAMINE SULPHOHYDROLASE	K01565	N-sulfoglucosamine sulfohydrolase [EC:3.10.1.1]
1718	COBS04158	531.339	1.55191	0.364432	3.76271	0.000168081	0.00837515	UP	-	-		PTHR43108,PTHR43108:SF6	N-ACETYLGLUCOSAMINE-6-SULFATASE FAMILY MEMBER,N-SULPHOGLUCOSAMINE SULPHOHYDROLASE	K15029	translation initiation factor 3 subunit L
1724	COBS04158	531.339	1.55191	0.364432	3.76271	0.000168081	0.00837515	UP	IPR032506	N-sulphoglucosamine sulphohydrolase, C-terminal	-	NA	NA	K01565	N-sulfoglucosamine sulfohydrolase [EC:3.10.1.1]
1729	COBS04158	531.339	1.55191	0.364432	3.76271	0.000168081	0.00837515	UP	-	-		PTHR43108:SF6,PTHR43108	N-SULPHOGLUCOSAMINE SULPHOHYDROLASE,N-ACETYLGLUCOSAMINE-6-SULFATASE FAMILY MEMBER	K15029	translation initiation factor 3 subunit L
3054	COBS06610	813.288	1.55109	0.325568	4.57723	4.71e-06	0.000526568	UP	IPR007829	TM2 domain	-	NA	NA	K19370	DnaJ homolog subfamily C member 22
3055	COBS06610	813.288	1.55109	0.325568	4.57723	4.71e-06	0.000526568	UP	IPR001623	DnaJ domain	-	NA	NA	K19370	DnaJ homolog subfamily C member 22
3056	COBS06610	813.288	1.55109	0.325568	4.57723	4.71e-06	0.000526568	UP	IPR036869	Chaperone J-domain superfamily	-	NA	NA	K19370	DnaJ homolog subfamily C member 22
3057	COBS06610	813.288	1.55109	0.325568	4.57723	4.71e-06	0.000526568	UP	-	-		PTHR44733	DNAJ HOMOLOG SUBFAMILY C MEMBER 22	K19370	DnaJ homolog subfamily C member 22
569	COBS01464	996.654	1.55021	0.45155	3.10398	0.00190939	0.0426168	UP	IPR015720	Transmembrane emp24 domain-containing protein	-	PTHR22811	TRANSMEMBRANE EMP24 DOMAIN-CONTAINING PROTEIN	K20351	p24 family protein gamma-5
570	COBS01464	996.654	1.55021	0.45155	3.10398	0.00190939	0.0426168	UP	-	-		PTHR22811:SF45	TRANSMEMBRANE EMP24 DOMAIN-CONTAINING PROTEIN 6	K20351	p24 family protein gamma-5
571	COBS01464	996.654	1.55021	0.45155	3.10398	0.00190939	0.0426168	UP	IPR036598	GOLD domain superfamily	-	NA	NA	K20351	p24 family protein gamma-5
572	COBS01464	996.654	1.55021	0.45155	3.10398	0.00190939	0.0426168	UP	IPR009038	GOLD domain	-	NA	NA	K20351	p24 family protein gamma-5
609	COBS01767	1909.51	1.54961	0.484763	3.13503	0.00171838	0.0401281	UP	-	-		PTHR12692:SF1	TUMOR SUPPRESSOR CANDIDATE 3	K19478	dolichyl-diphosphooligosaccharide---protein glycosyltransferase subunit MAGT1/TUSC3
610	COBS01767	1909.51	1.54961	0.484763	3.13503	0.00171838	0.0401281	UP	IPR021149	Oligosaccharyl transferase complex, subunit OST3/OST6	-	PTHR12692	DOLICHYL-DIPHOSPHOOLIGOSACCHARIDE--PROTEIN GLYCOSYLTRANSFERASE-RELATED	K19478	dolichyl-diphosphooligosaccharide---protein glycosyltransferase subunit MAGT1/TUSC3
611	COBS01767	1909.51	1.54961	0.484763	3.13503	0.00171838	0.0401281	UP	IPR036249	Thioredoxin-like superfamily	-	NA	NA	K19478	dolichyl-diphosphooligosaccharide---protein glycosyltransferase subunit MAGT1/TUSC3
6115	COBS13629	1084.11	1.5487	0.347903	4.7763	1.79e-06	0.000236739	UP	IPR029058	Alpha/Beta hydrolase fold	-	NA	NA	K01285	lysosomal Pro-X carboxypeptidase [EC:3.4.16.2]
6116	COBS13629	1084.11	1.5487	0.347903	4.7763	1.79e-06	0.000236739	UP	IPR008758	Peptidase S28	GO:0006508|GO:0008236	NA	NA	K01285	lysosomal Pro-X carboxypeptidase [EC:3.4.16.2]
6117	COBS13629	1084.11	1.5487	0.347903	4.7763	1.79e-06	0.000236739	UP	-	-		PTHR11010,PTHR11010:SF97	PROTEASE S28 PRO-X CARBOXYPEPTIDASE-RELATED,LYSOSOMAL PRO-X CARBOXYPEPTIDASE	K01285	lysosomal Pro-X carboxypeptidase [EC:3.4.16.2]
6118	COBS13629	1084.11	1.5487	0.347903	4.7763	1.79e-06	0.000236739	UP	IPR042269	Serine carboxypeptidase S28, SKS domain	-	NA	NA	K01285	lysosomal Pro-X carboxypeptidase [EC:3.4.16.2]
848	COBS02545	1181.95	1.54846	0.387125	3.49327	0.000477138	0.0167383	UP	-	-		PTHR10174,PTHR10174:SF218	ALPHA-TOCOPHEROL TRANSFER PROTEIN-RELATED,SD01558P	NA	NA
849	COBS02545	1181.95	1.54846	0.387125	3.49327	0.000477138	0.0167383	UP	IPR011074	CRAL/TRIO, N-terminal domain	-	NA	NA	NA	NA
850	COBS02545	1181.95	1.54846	0.387125	3.49327	0.000477138	0.0167383	UP	IPR001251	CRAL-TRIO lipid binding domain	-	NA	NA	NA	NA
851	COBS02545	1181.95	1.54846	0.387125	3.49327	0.000477138	0.0167383	UP	IPR036273	CRAL/TRIO, N-terminal domain superfamily	-	NA	NA	NA	NA
855	COBS02545	1181.95	1.54846	0.387125	3.49327	0.000477138	0.0167383	UP	IPR036865	CRAL-TRIO lipid binding domain superfamily	-	NA	NA	NA	NA
856	COBS02545	1181.95	1.54846	0.387125	3.49327	0.000477138	0.0167383	UP	-	-		PTHR10174:SF218,PTHR10174	SD01558P,ALPHA-TOCOPHEROL TRANSFER PROTEIN-RELATED	NA	NA
4873	COBS09954	1314.59	1.54511	0.37871	3.49781	0.000469093	0.0164931	UP	-	-		PTHR11523:SF31	SODIUM/POTASSIUM-TRANSPORTING ATPASE SUBUNIT BETA-1	K01540	sodium/potassium-transporting ATPase subunit beta
4874	COBS09954	1314.59	1.54511	0.37871	3.49781	0.000469093	0.0164931	UP	IPR038702	Sodium/potassium-transporting ATPase subunit beta superfamily	-	NA	NA	K01540	sodium/potassium-transporting ATPase subunit beta
4875	COBS09954	1314.59	1.54511	0.37871	3.49781	0.000469093	0.0164931	UP	IPR000402	Sodium/potassium-transporting ATPase subunit beta	GO:0005890|GO:0006813|GO:0006814	PTHR11523	SODIUM/POTASSIUM-DEPENDENT ATPASE BETA SUBUNIT	K01540	sodium/potassium-transporting ATPase subunit beta
1235	COBS03334	22700.8	1.53934	0.456734	3.57008	0.000356874	0.0140536	UP	IPR036990	Metallocarboxypeptidase-like, propeptide	-	NA	NA	NA	NA
1236	COBS03334	22700.8	1.53934	0.456734	3.57008	0.000356874	0.0140536	UP	IPR003146	Carboxypeptidase, activation peptide	-	NA	NA	NA	NA
1237	COBS03334	22700.8	1.53934	0.456734	3.57008	0.000356874	0.0140536	UP	IPR000834	Peptidase M14, carboxypeptidase A	GO:0004181|GO:0006508|GO:0008270	NA	NA	NA	NA
1246	COBS03334	22700.8	1.53934	0.456734	3.57008	0.000356874	0.0140536	UP	-	-		PTHR11705,PTHR11705:SF123	PROTEASE FAMILY M14 CARBOXYPEPTIDASE A,B,RE62864P-RELATED	NA	NA
1250	COBS03334	22700.8	1.53934	0.456734	3.57008	0.000356874	0.0140536	UP	-	-		PTHR11705:SF123,PTHR11705	RE62864P-RELATED,PROTEASE FAMILY M14 CARBOXYPEPTIDASE A,B	NA	NA
5732	COBS11910	667.822	1.52632	0.327022	4.8892	1.01e-06	0.000144009	UP	-	-		PTHR42858	AMINOTRANSFERASE	K00832	NA
5733	COBS11910	667.822	1.52632	0.327022	4.8892	1.01e-06	0.000144009	UP	IPR015421	Pyridoxal phosphate-dependent transferase, major domain	GO:0003824	NA	NA	K00832	NA
5734	COBS11910	667.822	1.52632	0.327022	4.8892	1.01e-06	0.000144009	UP	IPR015422	Pyridoxal phosphate-dependent transferase, small domain	GO:0003824	NA	NA	K00832	NA
5735	COBS11910	667.822	1.52632	0.327022	4.8892	1.01e-06	0.000144009	UP	IPR015424	Pyridoxal phosphate-dependent transferase	-	NA	NA	K00832	NA
5736	COBS11910	667.822	1.52632	0.327022	4.8892	1.01e-06	0.000144009	UP	IPR004839	Aminotransferase, class I/classII	GO:0009058|GO:0030170	NA	NA	K00832	NA
7769	COBS18063	772.365	1.52443	0.422689	3.12137	0.00180012	0.0411182	UP	IPR001753	Enoyl-CoA hydratase/isomerase	GO:0003824	NA	NA	K13238	Delta3-Delta2-enoyl-CoA isomerase [EC:5.3.3.8]
7770	COBS18063	772.365	1.52443	0.422689	3.12137	0.00180012	0.0411182	UP	-	-		PTHR11941:SF45,PTHR11941	ENOYL-COA DELTA ISOMERASE 1, MITOCHONDRIAL,ENOYL-COA HYDRATASE-RELATED	K13238	Delta3-Delta2-enoyl-CoA isomerase [EC:5.3.3.8]
7771	COBS18063	772.365	1.52443	0.422689	3.12137	0.00180012	0.0411182	UP	IPR029045	ClpP/crotonase-like domain superfamily	-	NA	NA	K13238	Delta3-Delta2-enoyl-CoA isomerase [EC:5.3.3.8]
4327	COBS09350	2078.61	1.52255	0.482419	3.03955	0.00236931	0.0486486	UP	IPR002350	Kazal domain	GO:0005515	NA	NA	NA	NA
4328	COBS09350	2078.61	1.52255	0.482419	3.03955	0.00236931	0.0486486	UP	IPR036058	Kazal domain superfamily	GO:0005515	NA	NA	NA	NA
4329	COBS09350	2078.61	1.52255	0.482419	3.03955	0.00236931	0.0486486	UP	IPR004156	Organic anion transporter polypeptide	GO:0016020|GO:0055085	PTHR11388	ORGANIC ANION TRANSPORTER	NA	NA
4330	COBS09350	2078.61	1.52255	0.482419	3.03955	0.00236931	0.0486486	UP	IPR036259	MFS transporter superfamily	-	NA	NA	NA	NA
4331	COBS09350	2078.61	1.52255	0.482419	3.03955	0.00236931	0.0486486	UP	-	-		PTHR11388:SF76	SOLUTE CARRIER ORGANIC ANION TRANSPORTER FAMILY MEMBER	NA	NA
5764	COBS12102	6659.85	1.50262	0.465373	3.37792	0.000730367	0.0226972	UP	-	-		PTHR11431:SF43	FERRITIN	K00522	ferritin heavy chain [EC:1.16.3.2]
5765	COBS12102	6659.85	1.50262	0.465373	3.37792	0.000730367	0.0226972	UP	IPR009040	Ferritin-like diiron domain	-	NA	NA	K00522	ferritin heavy chain [EC:1.16.3.2]
5766	COBS12102	6659.85	1.50262	0.465373	3.37792	0.000730367	0.0226972	UP	IPR012347	Ferritin-like	-	NA	NA	K00522	ferritin heavy chain [EC:1.16.3.2]
5768	COBS12102	6659.85	1.50262	0.465373	3.37792	0.000730367	0.0226972	UP	IPR001519	Ferritin	GO:0006826|GO:0006879|GO:0008199	PTHR11431	FERRITIN	K00522	ferritin heavy chain [EC:1.16.3.2]
5769	COBS12102	6659.85	1.50262	0.465373	3.37792	0.000730367	0.0226972	UP	IPR009078	Ferritin-like superfamily	-	NA	NA	K00522	ferritin heavy chain [EC:1.16.3.2]
5771	COBS12102	6659.85	1.50262	0.465373	3.37792	0.000730367	0.0226972	UP	IPR008331	Ferritin/DPS protein domain	GO:0008199	NA	NA	K00522	ferritin heavy chain [EC:1.16.3.2]
143	COBS00346	497.597	1.50188	0.275909	5.47356	4.41e-08	8.52e-06	UP	IPR042779	MISP/MISP3	-	PTHR18839	MITOTIC INTERACTOR AND SUBSTRATE OF PLK1 MISP FAMILY MEMBER	NA	NA
144	COBS00346	497.597	1.50188	0.275909	5.47356	4.41e-08	8.52e-06	UP	-	-		PTHR18839:SF0	SI:CH211-153L6.6-RELATED	NA	NA
145	COBS00346	497.597	1.50188	0.275909	5.47356	4.41e-08	8.52e-06	UP	-	-		NA	NA	NA	NA
146	COBS00346	497.597	1.50188	0.275909	5.47356	4.41e-08	8.52e-06	UP	IPR029304	A-kinase anchor protein 2, C-terminal domain	-	NA	NA	NA	NA
286	COBS00807	461.8	1.49781	0.447031	3.0758	0.0020994	0.0451198	UP	IPR005552	Scramblase	GO:0017121|GO:0017128	PTHR23248	PHOSPHOLIPID SCRAMBLASE-RELATED	NA	NA
287	COBS00807	461.8	1.49781	0.447031	3.0758	0.0020994	0.0451198	UP	-	-		PTHR23248:SF38	PHOSPHOLIPID SCRAMBLASE 1	NA	NA
290	COBS00807	461.8	1.49781	0.447031	3.0758	0.0020994	0.0451198	UP	IPR025659	Tubby-like, C-terminal	-	NA	NA	NA	NA
1910	COBS04550	724.818	1.47106	0.52615	3.33926	0.000840024	0.0249867	UP	IPR001128	Cytochrome P450	GO:0004497|GO:0005506|GO:0016705|GO:0020037	NA	NA	NA	NA
1911	COBS04550	724.818	1.47106	0.52615	3.33926	0.000840024	0.0249867	UP	-	-		PTHR24291,PTHR24291:SF105	CYTOCHROME P450 FAMILY 4,CYTOCHROME P450 4P1-RELATED	NA	NA
1912	COBS04550	724.818	1.47106	0.52615	3.33926	0.000840024	0.0249867	UP	IPR036396	Cytochrome P450 superfamily	GO:0004497|GO:0005506|GO:0016705|GO:0020037	NA	NA	NA	NA
1914	COBS04550	724.818	1.47106	0.52615	3.33926	0.000840024	0.0249867	UP	-	-		PTHR24291:SF105,PTHR24291	CYTOCHROME P450 4P1-RELATED,CYTOCHROME P450 FAMILY 4	NA	NA
1915	COBS04550	724.818	1.47106	0.52615	3.33926	0.000840024	0.0249867	UP	-	-		PTHR24291,PTHR24291:SF105	CYTOCHROME P450 FAMILY 4,CYTOCHROME P450 4P1-RELATED	K15001	cytochrome P450 family 4 [EC:1.14.-.-]
1916	COBS04550	724.818	1.47106	0.52615	3.33926	0.000840024	0.0249867	UP	IPR002403	Cytochrome P450, E-class, group IV	GO:0004497|GO:0005506|GO:0016705|GO:0020037	NA	NA	K15001	cytochrome P450 family 4 [EC:1.14.-.-]
1923	COBS04550	724.818	1.47106	0.52615	3.33926	0.000840024	0.0249867	UP	IPR036396	Cytochrome P450 superfamily	GO:0004497|GO:0005506|GO:0016705|GO:0020037	NA	NA	K15001	cytochrome P450 family 4 [EC:1.14.-.-]
1925	COBS04550	724.818	1.47106	0.52615	3.33926	0.000840024	0.0249867	UP	-	-		PTHR24291:SF105,PTHR24291	CYTOCHROME P450 4P1-RELATED,CYTOCHROME P450 FAMILY 4	K15001	cytochrome P450 family 4 [EC:1.14.-.-]
1926	COBS04550	724.818	1.47106	0.52615	3.33926	0.000840024	0.0249867	UP	IPR017972	Cytochrome P450, conserved site	GO:0005506|GO:0016705	NA	NA	K15001	cytochrome P450 family 4 [EC:1.14.-.-]
1931	COBS04550	724.818	1.47106	0.52615	3.33926	0.000840024	0.0249867	UP	IPR017972	Cytochrome P450, conserved site	GO:0005506|GO:0016705	NA	NA	NA	NA
1936	COBS04550	724.818	1.47106	0.52615	3.33926	0.000840024	0.0249867	UP	IPR001128	Cytochrome P450	GO:0004497|GO:0005506|GO:0016705|GO:0020037	NA	NA	K15001	cytochrome P450 family 4 [EC:1.14.-.-]
1939	COBS04550	724.818	1.47106	0.52615	3.33926	0.000840024	0.0249867	UP	IPR002401	Cytochrome P450, E-class, group I	GO:0004497|GO:0005506|GO:0016705|GO:0020037	NA	NA	K15001	cytochrome P450 family 4 [EC:1.14.-.-]
1943	COBS04550	724.818	1.47106	0.52615	3.33926	0.000840024	0.0249867	UP	IPR002401	Cytochrome P450, E-class, group I	GO:0004497|GO:0005506|GO:0016705|GO:0020037	NA	NA	NA	NA
1952	COBS04550	724.818	1.47106	0.52615	3.33926	0.000840024	0.0249867	UP	-	-		PTHR24291:SF106,PTHR24291	CYTOCHROME P450 4G1-RELATED,CYTOCHROME P450 FAMILY 4	NA	NA
1987	COBS04550	724.818	1.47106	0.52615	3.33926	0.000840024	0.0249867	UP	IPR002403	Cytochrome P450, E-class, group IV	GO:0004497|GO:0005506|GO:0016705|GO:0020037	NA	NA	NA	NA
4326	COBS09343	1928.19	1.44551	0.3833	3.64013	0.000272501	0.0116173	UP	-	-		NA	NA	NA	NA
382	COBS00848	533.158	1.4452	0.437665	3.20864	0.00133366	0.033333	UP	IPR005475	Transketolase-like, pyrimidine-binding domain	-	NA	NA	K00167	2-oxoisovalerate dehydrogenase E1 component subunit beta [EC:1.2.4.4]
383	COBS00848	533.158	1.4452	0.437665	3.20864	0.00133366	0.033333	UP	IPR029061	Thiamin diphosphate-binding fold	-	NA	NA	K00167	2-oxoisovalerate dehydrogenase E1 component subunit beta [EC:1.2.4.4]
384	COBS00848	533.158	1.4452	0.437665	3.20864	0.00133366	0.033333	UP	-	-		PTHR42980	2-OXOISOVALERATE DEHYDROGENASE SUBUNIT BETA-RELATED	K00167	2-oxoisovalerate dehydrogenase E1 component subunit beta [EC:1.2.4.4]
385	COBS00848	533.158	1.4452	0.437665	3.20864	0.00133366	0.033333	UP	IPR009014	Transketolase C-terminal/Pyruvate-ferredoxin oxidoreductase domain II	GO:0003824	NA	NA	K00167	2-oxoisovalerate dehydrogenase E1 component subunit beta [EC:1.2.4.4]
386	COBS00848	533.158	1.4452	0.437665	3.20864	0.00133366	0.033333	UP	IPR033248	Transketolase, C-terminal domain	-	NA	NA	K00167	2-oxoisovalerate dehydrogenase E1 component subunit beta [EC:1.2.4.4]
1608	COBS03620	4083.47	1.4385	0.438546	3.15474	0.00160642	0.0381398	UP	IPR001975	Ribosomal protein L40e	GO:0003735|GO:0005840|GO:0006412	NA	NA	K02927	ubiquitin-large subunit ribosomal protein L40e
1609	COBS03620	4083.47	1.4385	0.438546	3.15474	0.00160642	0.0381398	UP	-	-		PTHR10666:SF368,PTHR10666	UBIQUITIN-60S RIBOSOMAL PROTEIN L40,UBIQUITIN	K02927	ubiquitin-large subunit ribosomal protein L40e
1610	COBS03620	4083.47	1.4385	0.438546	3.15474	0.00160642	0.0381398	UP	IPR000626	Ubiquitin-like domain	GO:0005515	NA	NA	K02927	ubiquitin-large subunit ribosomal protein L40e
1611	COBS03620	4083.47	1.4385	0.438546	3.15474	0.00160642	0.0381398	UP	IPR038587	Ribosomal protein L40e superfamily	-	NA	NA	K02927	ubiquitin-large subunit ribosomal protein L40e
1612	COBS03620	4083.47	1.4385	0.438546	3.15474	0.00160642	0.0381398	UP	IPR019956	Ubiquitin domain	-	NA	NA	K02927	ubiquitin-large subunit ribosomal protein L40e
1613	COBS03620	4083.47	1.4385	0.438546	3.15474	0.00160642	0.0381398	UP	IPR019954	Ubiquitin conserved site	-	NA	NA	K02927	ubiquitin-large subunit ribosomal protein L40e
1614	COBS03620	4083.47	1.4385	0.438546	3.15474	0.00160642	0.0381398	UP	IPR029071	Ubiquitin-like domain superfamily	-	NA	NA	K02927	ubiquitin-large subunit ribosomal protein L40e
7803	COBS18113	1659.63	1.43272	0.44887	4.37617	1.21e-05	0.00112485	UP	IPR020846	Major facilitator superfamily domain	GO:0022857	NA	NA	NA	NA
7804	COBS18113	1659.63	1.43272	0.44887	4.37617	1.21e-05	0.00112485	UP	IPR036259	MFS transporter superfamily	-	NA	NA	NA	NA
7805	COBS18113	1659.63	1.43272	0.44887	4.37617	1.21e-05	0.00112485	UP	IPR011701	Major facilitator superfamily	GO:0022857|GO:0055085	NA	NA	NA	NA
7806	COBS18113	1659.63	1.43272	0.44887	4.37617	1.21e-05	0.00112485	UP	-	-		PTHR23506,PTHR23506:SF26	-,MFS-TYPE TRANSPORTER SLC18B1	NA	NA
797	COBS02271	210.924	1.43112	0.354521	3.5869	0.000334634	0.0134248	UP	IPR045853	Peptide chain release factor class I superfamily	-	NA	NA	K23498	peptide chain release factor
798	COBS02271	210.924	1.43112	0.354521	3.5869	0.000334634	0.0134248	UP	-	-		PTHR46203	PROBABLE PEPTIDE CHAIN RELEASE FACTOR C12ORF65	K23498	peptide chain release factor
799	COBS02271	210.924	1.43112	0.354521	3.5869	0.000334634	0.0134248	UP	IPR000352	Peptide chain release factor class I	GO:0003747|GO:0006415	NA	NA	K23498	peptide chain release factor
3555	COBS07416	5478.33	1.42124	0.466471	3.20726	0.00134004	0.0334391	UP	IPR021132	Ribosomal protein L18/L18-A/B/e, conserved site	GO:0003735|GO:0005840|GO:0006412	NA	NA	K02883	large subunit ribosomal protein L18e
3556	COBS07416	5478.33	1.42124	0.466471	3.20726	0.00134004	0.0334391	UP	IPR000039	Ribosomal protein L18e	GO:0003735|GO:0005840|GO:0006412	PTHR10934	60S RIBOSOMAL PROTEIN L18	K02883	large subunit ribosomal protein L18e
3557	COBS07416	5478.33	1.42124	0.466471	3.20726	0.00134004	0.0334391	UP	IPR036227	Ribosomal L18e/L15P superfamily	-	NA	NA	K02883	large subunit ribosomal protein L18e
3558	COBS07416	5478.33	1.42124	0.466471	3.20726	0.00134004	0.0334391	UP	IPR021131	Ribosomal protein L18e/L15P	-	NA	NA	K02883	large subunit ribosomal protein L18e
3559	COBS07416	5478.33	1.42124	0.466471	3.20726	0.00134004	0.0334391	UP	-	-		PTHR10934:SF2	60S RIBOSOMAL PROTEIN L18	K02883	large subunit ribosomal protein L18e
2097	COBS04839	344.723	1.41374	0.363841	3.57737	0.000347067	0.0138173	UP	IPR039860	Protein rolling stone	-	PTHR12242:SF1	IP08657P-RELATED	NA	NA
2098	COBS04839	344.723	1.41374	0.363841	3.57737	0.000347067	0.0138173	UP	-	-		PTHR12242	UNCHARACTERIZED	NA	NA
3572	COBS07572	652.705	1.40973	0.434609	3.19864	0.00138076	0.0340211	UP	IPR023271	Aquaporin-like	-	NA	NA	K09884	aquaporin rerated protein, invertebrate
3573	COBS07572	652.705	1.40973	0.434609	3.19864	0.00138076	0.0340211	UP	IPR000425	Major intrinsic protein	GO:0015267|GO:0016020|GO:0055085	NA	NA	K09884	aquaporin rerated protein, invertebrate
3574	COBS07572	652.705	1.40973	0.434609	3.19864	0.00138076	0.0340211	UP	-	-		PTHR19139:SF270	ENTOMOGLYCEROPORIN 1-RELATED	K09884	aquaporin rerated protein, invertebrate
3575	COBS07572	652.705	1.40973	0.434609	3.19864	0.00138076	0.0340211	UP	IPR022357	Major intrinsic protein, conserved site	-	NA	NA	K09884	aquaporin rerated protein, invertebrate
3576	COBS07572	652.705	1.40973	0.434609	3.19864	0.00138076	0.0340211	UP	IPR034294	Aquaporin transporter	-	PTHR19139	AQUAPORIN TRANSPORTER	K09884	aquaporin rerated protein, invertebrate
4069	COBS08598	596.517	1.40789	0.391499	3.82669	0.00012988	0.00691189	UP	IPR008952	Tetraspanin, EC2 domain superfamily	GO:0016021	NA	NA	NA	NA
4070	COBS08598	596.517	1.40789	0.391499	3.82669	0.00012988	0.00691189	UP	IPR000301	Tetraspanin, animals	GO:0016021	NA	NA	NA	NA
4073	COBS08598	596.517	1.40789	0.391499	3.82669	0.00012988	0.00691189	UP	-	-		PTHR19282:SF431	IP01824P-RELATED	NA	NA
4074	COBS08598	596.517	1.40789	0.391499	3.82669	0.00012988	0.00691189	UP	-	-		PTHR19282:SF395	TETRASPANIN	NA	NA
4075	COBS08598	596.517	1.40789	0.391499	3.82669	0.00012988	0.00691189	UP	IPR018499	Tetraspanin/Peripherin	GO:0016021	PTHR19282	TETRASPANIN	NA	NA
5025	COBS10512	349.619	1.39981	0.377975	3.56243	0.000367436	0.0143007	UP	IPR004001	Actin, conserved site	-	NA	NA	K05692	actin beta/gamma 1
5026	COBS10512	349.619	1.39981	0.377975	3.56243	0.000367436	0.0143007	UP	IPR043129	ATPase, nucleotide binding domain	-	NA	NA	K05692	actin beta/gamma 1
5027	COBS10512	349.619	1.39981	0.377975	3.56243	0.000367436	0.0143007	UP	IPR020902	Actin/actin-like conserved site	-	NA	NA	K05692	actin beta/gamma 1
5028	COBS10512	349.619	1.39981	0.377975	3.56243	0.000367436	0.0143007	UP	-	-		PTHR11937:SF162	ACTIN, INDIRECT FLIGHT MUSCLE-LIKE PROTEIN	K05692	actin beta/gamma 1
5029	COBS10512	349.619	1.39981	0.377975	3.56243	0.000367436	0.0143007	UP	IPR004000	Actin family	-	PTHR11937	ACTIN	K05692	actin beta/gamma 1
8017	COBS18820	5426.09	1.37735	0.336633	3.99612	6.44e-05	0.00414095	UP	IPR002359	Ribosomal protein L6, conserved site-2	GO:0003735|GO:0005840|GO:0006412	NA	NA	K02940	large subunit ribosomal protein L9e
8018	COBS18820	5426.09	1.37735	0.336633	3.99612	6.44e-05	0.00414095	UP	IPR020040	Ribosomal protein L6, alpha-beta domain	GO:0003735|GO:0005840|GO:0006412|GO:0019843	NA	NA	K02940	large subunit ribosomal protein L9e
8019	COBS18820	5426.09	1.37735	0.336633	3.99612	6.44e-05	0.00414095	UP	IPR000702	Ribosomal protein L6	GO:0003735|GO:0005840|GO:0006412|GO:0019843	PTHR11655	60S/50S RIBOSOMAL PROTEIN L6/L9	K02940	large subunit ribosomal protein L9e
8020	COBS18820	5426.09	1.37735	0.336633	3.99612	6.44e-05	0.00414095	UP	IPR036789	Ribosomal protein L6, alpha-beta domain superfamily	GO:0003735|GO:0005840|GO:0006412|GO:0019843	NA	NA	K02940	large subunit ribosomal protein L9e
8021	COBS18820	5426.09	1.37735	0.336633	3.99612	6.44e-05	0.00414095	UP	-	-		PTHR11655:SF16	60S RIBOSOMAL PROTEIN L9-RELATED	K02940	large subunit ribosomal protein L9e
2053	COBS04671	4434.9	1.36989	0.326616	4.19523	2.73e-05	0.00213253	UP	IPR036394	Ribosomal protein L22/L17 superfamily	GO:0003735|GO:0005840|GO:0006412	NA	NA	K02880	large subunit ribosomal protein L17e
2054	COBS04671	4434.9	1.36989	0.326616	4.19523	2.73e-05	0.00213253	UP	-	-		PTHR11593:SF28	-	K02880	large subunit ribosomal protein L17e
2055	COBS04671	4434.9	1.36989	0.326616	4.19523	2.73e-05	0.00213253	UP	IPR018260	Ribosomal protein L22/L17, conserved site	GO:0003735|GO:0005840|GO:0006412	NA	NA	K02880	large subunit ribosomal protein L17e
2056	COBS04671	4434.9	1.36989	0.326616	4.19523	2.73e-05	0.00213253	UP	IPR005721	Ribosomal protein L22/L17, eukaryotic/archaeal	GO:0003735|GO:0006412|GO:0015934	PTHR11593	60S RIBOSOMAL PROTEIN L17	K02880	large subunit ribosomal protein L17e
2057	COBS04671	4434.9	1.36989	0.326616	4.19523	2.73e-05	0.00213253	UP	IPR001063	Ribosomal protein L22/L17	GO:0003735|GO:0005840|GO:0006412	NA	NA	K02880	large subunit ribosomal protein L17e
3930	COBS08243	633.812	1.36859	0.318068	3.89459	9.84e-05	0.00578575	UP	IPR020846	Major facilitator superfamily domain	GO:0022857	NA	NA	K08202	MFS transporter, OCT family, solute carrier family 22 (organic cation transporter), member 4/5
3931	COBS08243	633.812	1.36859	0.318068	3.89459	9.84e-05	0.00578575	UP	IPR005828	Major facilitator, sugar transporter-like	GO:0016021|GO:0022857|GO:0055085	NA	NA	K08202	MFS transporter, OCT family, solute carrier family 22 (organic cation transporter), member 4/5
3932	COBS08243	633.812	1.36859	0.318068	3.89459	9.84e-05	0.00578575	UP	-	-		PTHR24064,PTHR24064:SF198	SOLUTE CARRIER FAMILY 22 MEMBER,SOLUTE CARRIER FAMILY 22 MEMBER 13	K08202	MFS transporter, OCT family, solute carrier family 22 (organic cation transporter), member 4/5
3933	COBS08243	633.812	1.36859	0.318068	3.89459	9.84e-05	0.00578575	UP	IPR036259	MFS transporter superfamily	-	NA	NA	K08202	MFS transporter, OCT family, solute carrier family 22 (organic cation transporter), member 4/5
7459	COBS16415	5121.83	1.36653	0.429076	3.1106	0.0018671	0.0419722	UP	IPR046867	Aldehyde oxidase/xanthine dehydrogenase, second molybdopterin binding domain	-	NA	NA	K00106	xanthine dehydrogenase/oxidase [EC:1.17.1.4 1.17.3.2]
7460	COBS16415	5121.83	1.36653	0.429076	3.1106	0.0018671	0.0419722	UP	IPR016208	Aldehyde oxidase/xanthine dehydrogenase	GO:0005506|GO:0016491	PTHR11908	XANTHINE DEHYDROGENASE	K00106	xanthine dehydrogenase/oxidase [EC:1.17.1.4 1.17.3.2]
7461	COBS16415	5121.83	1.36653	0.429076	3.1106	0.0018671	0.0419722	UP	IPR036856	Aldehyde oxidase/xanthine dehydrogenase, a/b hammerhead superfamily	-	NA	NA	K00106	xanthine dehydrogenase/oxidase [EC:1.17.1.4 1.17.3.2]
7462	COBS16415	5121.83	1.36653	0.429076	3.1106	0.0018671	0.0419722	UP	IPR016166	FAD-binding domain, PCMH-type	GO:0071949	NA	NA	K00106	xanthine dehydrogenase/oxidase [EC:1.17.1.4 1.17.3.2]
7463	COBS16415	5121.83	1.36653	0.429076	3.1106	0.0018671	0.0419722	UP	IPR037165	Aldehyde oxidase/xanthine dehydrogenase, molybdopterin binding domain superfamily	GO:0016491	NA	NA	K00106	xanthine dehydrogenase/oxidase [EC:1.17.1.4 1.17.3.2]
7464	COBS16415	5121.83	1.36653	0.429076	3.1106	0.0018671	0.0419722	UP	IPR036884	[2Fe-2S]-binding domain superfamily	-	NA	NA	K00106	xanthine dehydrogenase/oxidase [EC:1.17.1.4 1.17.3.2]
7465	COBS16415	5121.83	1.36653	0.429076	3.1106	0.0018671	0.0419722	UP	IPR005107	CO dehydrogenase flavoprotein, C-terminal	-	NA	NA	K00106	xanthine dehydrogenase/oxidase [EC:1.17.1.4 1.17.3.2]
7466	COBS16415	5121.83	1.36653	0.429076	3.1106	0.0018671	0.0419722	UP	IPR000674	Aldehyde oxidase/xanthine dehydrogenase, a/b hammerhead	-	NA	NA	K00106	xanthine dehydrogenase/oxidase [EC:1.17.1.4 1.17.3.2]
7467	COBS16415	5121.83	1.36653	0.429076	3.1106	0.0018671	0.0419722	UP	IPR006058	2Fe-2S ferredoxin, iron-sulphur binding site	GO:0051537	NA	NA	K00106	xanthine dehydrogenase/oxidase [EC:1.17.1.4 1.17.3.2]
7468	COBS16415	5121.83	1.36653	0.429076	3.1106	0.0018671	0.0419722	UP	IPR036010	2Fe-2S ferredoxin-like superfamily	GO:0051536	NA	NA	K00106	xanthine dehydrogenase/oxidase [EC:1.17.1.4 1.17.3.2]
7469	COBS16415	5121.83	1.36653	0.429076	3.1106	0.0018671	0.0419722	UP	IPR036683	CO dehydrogenase flavoprotein, C-terminal domain superfamily	-	NA	NA	K00106	xanthine dehydrogenase/oxidase [EC:1.17.1.4 1.17.3.2]
7470	COBS16415	5121.83	1.36653	0.429076	3.1106	0.0018671	0.0419722	UP	IPR012675	Beta-grasp domain superfamily	-	NA	NA	K00106	xanthine dehydrogenase/oxidase [EC:1.17.1.4 1.17.3.2]
7471	COBS16415	5121.83	1.36653	0.429076	3.1106	0.0018671	0.0419722	UP	IPR002346	Molybdopterin dehydrogenase, FAD-binding	GO:0016491	NA	NA	K00106	xanthine dehydrogenase/oxidase [EC:1.17.1.4 1.17.3.2]
7472	COBS16415	5121.83	1.36653	0.429076	3.1106	0.0018671	0.0419722	UP	IPR016169	FAD-binding, type PCMH, subdomain 2	-	NA	NA	K00106	xanthine dehydrogenase/oxidase [EC:1.17.1.4 1.17.3.2]
7473	COBS16415	5121.83	1.36653	0.429076	3.1106	0.0018671	0.0419722	UP	IPR036318	FAD-binding, type PCMH-like superfamily	GO:0050660	NA	NA	K00106	xanthine dehydrogenase/oxidase [EC:1.17.1.4 1.17.3.2]
7474	COBS16415	5121.83	1.36653	0.429076	3.1106	0.0018671	0.0419722	UP	-	-		PTHR11908:SF132	ALDEHYDE OXIDASE 1-RELATED	K00106	xanthine dehydrogenase/oxidase [EC:1.17.1.4 1.17.3.2]
7475	COBS16415	5121.83	1.36653	0.429076	3.1106	0.0018671	0.0419722	UP	IPR001041	2Fe-2S ferredoxin-type iron-sulfur binding domain	GO:0051536	NA	NA	K00106	xanthine dehydrogenase/oxidase [EC:1.17.1.4 1.17.3.2]
7476	COBS16415	5121.83	1.36653	0.429076	3.1106	0.0018671	0.0419722	UP	IPR008274	Aldehyde oxidase/xanthine dehydrogenase, first molybdopterin binding domain	GO:0016491	NA	NA	K00106	xanthine dehydrogenase/oxidase [EC:1.17.1.4 1.17.3.2]
7477	COBS16415	5121.83	1.36653	0.429076	3.1106	0.0018671	0.0419722	UP	IPR002888	[2Fe-2S]-binding	GO:0016491|GO:0046872	NA	NA	K00106	xanthine dehydrogenase/oxidase [EC:1.17.1.4 1.17.3.2]
7623	COBS17368	1028.89	1.34861	0.375672	4.37234	1.23e-05	0.00113799	UP	IPR029753	D-isomer specific 2-hydroxyacid dehydrogenase, NAD-binding domain conserved site	-	NA	NA	K00049	glyoxylate/hydroxypyruvate reductase [EC:1.1.1.79 1.1.1.81]
7624	COBS17368	1028.89	1.34861	0.375672	4.37234	1.23e-05	0.00113799	UP	IPR006139	D-isomer specific 2-hydroxyacid dehydrogenase, catalytic domain	GO:0016616|GO:0051287	NA	NA	K00049	glyoxylate/hydroxypyruvate reductase [EC:1.1.1.79 1.1.1.81]
7625	COBS17368	1028.89	1.34861	0.375672	4.37234	1.23e-05	0.00113799	UP	-	-		PTHR10996,PTHR10996:SF119	2-HYDROXYACID DEHYDROGENASE-RELATED,FI03731P-RELATED	K00049	glyoxylate/hydroxypyruvate reductase [EC:1.1.1.79 1.1.1.81]
7626	COBS17368	1028.89	1.34861	0.375672	4.37234	1.23e-05	0.00113799	UP	IPR006140	D-isomer specific 2-hydroxyacid dehydrogenase, NAD-binding domain	GO:0051287	NA	NA	K00049	glyoxylate/hydroxypyruvate reductase [EC:1.1.1.79 1.1.1.81]
7627	COBS17368	1028.89	1.34861	0.375672	4.37234	1.23e-05	0.00113799	UP	IPR036291	NAD(P)-binding domain superfamily	-	NA	NA	K00049	glyoxylate/hydroxypyruvate reductase [EC:1.1.1.79 1.1.1.81]
3681	COBS08010	2634.78	1.34143	0.359701	3.2423	0.00118569	0.0310223	UP	IPR042089	Peptidase M13, domain 2	-	NA	NA	K08635	neprilysin [EC:3.4.24.11]
3682	COBS08010	2634.78	1.34143	0.359701	3.2423	0.00118569	0.0310223	UP	-	-		PTHR11733:SF216	NEPRILYSIN-1	K08635	neprilysin [EC:3.4.24.11]
3683	COBS08010	2634.78	1.34143	0.359701	3.2423	0.00118569	0.0310223	UP	IPR024079	Metallopeptidase, catalytic domain superfamily	GO:0008237	NA	NA	K08635	neprilysin [EC:3.4.24.11]
3684	COBS08010	2634.78	1.34143	0.359701	3.2423	0.00118569	0.0310223	UP	IPR008753	Peptidase M13, N-terminal domain	GO:0006508	NA	NA	K08635	neprilysin [EC:3.4.24.11]
3688	COBS08010	2634.78	1.34143	0.359701	3.2423	0.00118569	0.0310223	UP	IPR000718	Peptidase M13	GO:0004222|GO:0006508	PTHR11733	ZINC METALLOPROTEASE FAMILY M13 NEPRILYSIN-RELATED	K08635	neprilysin [EC:3.4.24.11]
3694	COBS08010	2634.78	1.34143	0.359701	3.2423	0.00118569	0.0310223	UP	IPR018497	Peptidase M13, C-terminal domain	GO:0004222|GO:0006508	NA	NA	K08635	neprilysin [EC:3.4.24.11]
3700	COBS08010	2634.78	1.34143	0.359701	3.2423	0.00118569	0.0310223	UP	IPR000718	Peptidase M13	GO:0004222|GO:0006508	PTHR11733	ZINC METALLOPROTEASE FAMILY M13 NEPRILYSIN-RELATED	NA	NA
3722	COBS08010	2634.78	1.34143	0.359701	3.2423	0.00118569	0.0310223	UP	IPR024079	Metallopeptidase, catalytic domain superfamily	GO:0008237	NA	NA	NA	NA
3723	COBS08010	2634.78	1.34143	0.359701	3.2423	0.00118569	0.0310223	UP	-	-		PTHR11733:SF216	NEPRILYSIN-1	NA	NA
3724	COBS08010	2634.78	1.34143	0.359701	3.2423	0.00118569	0.0310223	UP	IPR018497	Peptidase M13, C-terminal domain	GO:0004222|GO:0006508	NA	NA	NA	NA
3483	COBS07291	737.494	1.32987	0.344519	3.76894	0.000163946	0.00819518	UP	-	-		PTHR11785:SF514,PTHR11785	B(0,+)-TYPE AMINO ACID TRANSPORTER 1-LIKE PROTEIN,AMINO ACID TRANSPORTER	K13868	solute carrier family 7 (L-type amino acid transporter), member 9/15
3484	COBS07291	737.494	1.32987	0.344519	3.76894	0.000163946	0.00819518	UP	IPR002293	Amino acid/polyamine transporter I	GO:0016020|GO:0022857|GO:0055085	NA	NA	K13868	solute carrier family 7 (L-type amino acid transporter), member 9/15
5840	COBS12477	12688.1	1.32863	0.329152	4.5076	6.56e-06	0.000688487	UP	IPR003337	Trehalose-phosphatase	GO:0003824|GO:0005992	NA	NA	K00697	trehalose 6-phosphate synthase [EC:2.4.1.15 2.4.1.347]
5841	COBS12477	12688.1	1.32863	0.329152	4.5076	6.56e-06	0.000688487	UP	IPR001830	Glycosyl transferase, family 20	GO:0003824|GO:0005992	PTHR10788	TREHALOSE-6-PHOSPHATE SYNTHASE	K00697	trehalose 6-phosphate synthase [EC:2.4.1.15 2.4.1.347]
5842	COBS12477	12688.1	1.32863	0.329152	4.5076	6.56e-06	0.000688487	UP	IPR001830	Glycosyl transferase, family 20	GO:0003824|GO:0005992	PTHR10788	TREHALOSE-6-PHOSPHATE SYNTHASE	K01087	trehalose 6-phosphate phosphatase [EC:3.1.3.12]
5843	COBS12477	12688.1	1.32863	0.329152	4.5076	6.56e-06	0.000688487	UP	IPR003337	Trehalose-phosphatase	GO:0003824|GO:0005992	NA	NA	K01087	trehalose 6-phosphate phosphatase [EC:3.1.3.12]
5844	COBS12477	12688.1	1.32863	0.329152	4.5076	6.56e-06	0.000688487	UP	IPR036412	HAD-like superfamily	-	NA	NA	K00697	trehalose 6-phosphate synthase [EC:2.4.1.15 2.4.1.347]
5845	COBS12477	12688.1	1.32863	0.329152	4.5076	6.56e-06	0.000688487	UP	IPR036412	HAD-like superfamily	-	NA	NA	K01087	trehalose 6-phosphate phosphatase [EC:3.1.3.12]
5847	COBS12477	12688.1	1.32863	0.329152	4.5076	6.56e-06	0.000688487	UP	-	-		PTHR10788:SF97	BCDNA.GH08860	K00697	trehalose 6-phosphate synthase [EC:2.4.1.15 2.4.1.347]
5849	COBS12477	12688.1	1.32863	0.329152	4.5076	6.56e-06	0.000688487	UP	-	-		PTHR10788:SF97	BCDNA.GH08860	K01087	trehalose 6-phosphate phosphatase [EC:3.1.3.12]
5852	COBS12477	12688.1	1.32863	0.329152	4.5076	6.56e-06	0.000688487	UP	IPR006379	HAD-superfamily hydrolase, subfamily IIB	-	NA	NA	K00697	trehalose 6-phosphate synthase [EC:2.4.1.15 2.4.1.347]
5860	COBS12477	12688.1	1.32863	0.329152	4.5076	6.56e-06	0.000688487	UP	IPR023214	HAD superfamily	-	NA	NA	K00697	trehalose 6-phosphate synthase [EC:2.4.1.15 2.4.1.347]
5863	COBS12477	12688.1	1.32863	0.329152	4.5076	6.56e-06	0.000688487	UP	IPR006379	HAD-superfamily hydrolase, subfamily IIB	-	NA	NA	K01087	trehalose 6-phosphate phosphatase [EC:3.1.3.12]
5869	COBS12477	12688.1	1.32863	0.329152	4.5076	6.56e-06	0.000688487	UP	IPR023214	HAD superfamily	-	NA	NA	K01087	trehalose 6-phosphate phosphatase [EC:3.1.3.12]
1630	COBS03778	1185.33	1.32144	0.450762	3.202	0.00136476	0.0337863	UP	IPR017853	Glycoside hydrolase superfamily	-	NA	NA	K01195	beta-glucuronidase [EC:3.2.1.31]
1632	COBS03778	1185.33	1.32144	0.450762	3.202	0.00136476	0.0337863	UP	IPR008979	Galactose-binding-like domain superfamily	-	NA	NA	K01195	beta-glucuronidase [EC:3.2.1.31]
1633	COBS03778	1185.33	1.32144	0.450762	3.202	0.00136476	0.0337863	UP	IPR023232	Glycoside hydrolase, family 2, active site	-	NA	NA	K01195	beta-glucuronidase [EC:3.2.1.31]
1634	COBS03778	1185.33	1.32144	0.450762	3.202	0.00136476	0.0337863	UP	IPR006104	Glycosyl hydrolases family 2, sugar binding domain	GO:0004553|GO:0005975	NA	NA	K01195	beta-glucuronidase [EC:3.2.1.31]
1635	COBS03778	1185.33	1.32144	0.450762	3.202	0.00136476	0.0337863	UP	-	-		PTHR10066	BETA-GLUCURONIDASE	K01195	beta-glucuronidase [EC:3.2.1.31]
1636	COBS03778	1185.33	1.32144	0.450762	3.202	0.00136476	0.0337863	UP	IPR013783	Immunoglobulin-like fold	-	NA	NA	K01195	beta-glucuronidase [EC:3.2.1.31]
1637	COBS03778	1185.33	1.32144	0.450762	3.202	0.00136476	0.0337863	UP	IPR023230	Glycoside hydrolase, family 2, conserved site	-	NA	NA	K01195	beta-glucuronidase [EC:3.2.1.31]
1639	COBS03778	1185.33	1.32144	0.450762	3.202	0.00136476	0.0337863	UP	IPR036156	Beta-Galactosidase/glucuronidase domain superfamily	-	NA	NA	K01195	beta-glucuronidase [EC:3.2.1.31]
1644	COBS03778	1185.33	1.32144	0.450762	3.202	0.00136476	0.0337863	UP	IPR006103	Glycoside hydrolase family 2, catalytic domain	GO:0004553|GO:0005975	NA	NA	K01195	beta-glucuronidase [EC:3.2.1.31]
1647	COBS03778	1185.33	1.32144	0.450762	3.202	0.00136476	0.0337863	UP	IPR006101	Glycoside hydrolase, family 2	GO:0004553|GO:0005975	NA	NA	K01195	beta-glucuronidase [EC:3.2.1.31]
5373	COBS11074	983.657	1.32101	0.383221	3.42116	0.000623555	0.0201991	UP	IPR015021	Domain of unknown function DUF1907	GO:0005634	PTHR13204	PTD012 PROTEIN	NA	NA
5375	COBS11074	983.657	1.32101	0.383221	3.42116	0.000623555	0.0201991	UP	-	-		NA	NA	NA	NA
1691	COBS03851	1036.82	1.31846	0.316808	4.39254	1.12e-05	0.00105766	UP	IPR000990	Innexin	-	PTHR11893	INNEXIN	K22037	innexin
1693	COBS03851	1036.82	1.31846	0.316808	4.39254	1.12e-05	0.00105766	UP	-	-		PTHR11893:SF38	INNEXIN INX7	K22037	innexin
4172	COBS08855	623.353	1.3135	0.422712	3.74364	0.000181373	0.00879251	UP	IPR023209	D-amino-acid oxidase	GO:0003884|GO:0046416|GO:0071949	PTHR11530	D-AMINO ACID OXIDASE	K00273	D-amino-acid oxidase [EC:1.4.3.3]
4173	COBS08855	623.353	1.3135	0.422712	3.74364	0.000181373	0.00879251	UP	IPR006181	D-amino acid oxidase, conserved site	GO:0003884	NA	NA	K00273	D-amino-acid oxidase [EC:1.4.3.3]
4174	COBS08855	623.353	1.3135	0.422712	3.74364	0.000181373	0.00879251	UP	IPR006076	FAD dependent oxidoreductase	GO:0016491	NA	NA	K00273	D-amino-acid oxidase [EC:1.4.3.3]
4175	COBS08855	623.353	1.3135	0.422712	3.74364	0.000181373	0.00879251	UP	-	-		NA	NA	K00273	D-amino-acid oxidase [EC:1.4.3.3]
6982	COBS15360	882.028	1.31163	0.424913	3.44439	0.000572343	0.0188524	UP	IPR035595	UDP-glycosyltransferase family, conserved site	-	NA	NA	K00699	glucuronosyltransferase [EC:2.4.1.17]
6983	COBS15360	882.028	1.31163	0.424913	3.44439	0.000572343	0.0188524	UP	IPR002213	UDP-glucuronosyl/UDP-glucosyltransferase	GO:0008194	NA	NA	K00699	glucuronosyltransferase [EC:2.4.1.17]
6984	COBS15360	882.028	1.31163	0.424913	3.44439	0.000572343	0.0188524	UP	-	-		PTHR48043:SF114,PTHR48043	DOROTHY, ISOFORM A-RELATED,EG:EG0003.4 PROTEIN-RELATED	K00699	glucuronosyltransferase [EC:2.4.1.17]
6986	COBS15360	882.028	1.31163	0.424913	3.44439	0.000572343	0.0188524	UP	-	-		PTHR48043,PTHR48043:SF114	EG:EG0003.4 PROTEIN-RELATED,DOROTHY, ISOFORM A-RELATED	K00699	glucuronosyltransferase [EC:2.4.1.17]
2573	COBS05489	3490.01	1.29417	0.407575	3.32614	0.000880564	0.0257983	UP	IPR010979	Ribosomal protein S13-like, H2TH	GO:0003676	NA	NA	K02964	small subunit ribosomal protein S18e
2574	COBS05489	3490.01	1.29417	0.407575	3.32614	0.000880564	0.0257983	UP	IPR027437	30s ribosomal protein S13, C-terminal	-	NA	NA	K02964	small subunit ribosomal protein S18e
2575	COBS05489	3490.01	1.29417	0.407575	3.32614	0.000880564	0.0257983	UP	IPR001892	Ribosomal protein S13	GO:0003723|GO:0003735|GO:0005840|GO:0006412	NA	NA	K02964	small subunit ribosomal protein S18e
2576	COBS05489	3490.01	1.29417	0.407575	3.32614	0.000880564	0.0257983	UP	IPR018269	Ribosomal protein S13, conserved site	GO:0003723|GO:0003735|GO:0005840|GO:0006412	NA	NA	K02964	small subunit ribosomal protein S18e
2577	COBS05489	3490.01	1.29417	0.407575	3.32614	0.000880564	0.0257983	UP	-	-		PTHR10871:SF3,PTHR10871	40S RIBOSOMAL PROTEIN S18-RELATED,30S RIBOSOMAL PROTEIN S13/40S RIBOSOMAL PROTEIN S18	K02964	small subunit ribosomal protein S18e
5323	COBS10780	499.946	1.29084	0.292284	4.47019	7.81e-06	0.000788853	UP	IPR019363	Lipid droplet-associated hydrolase	GO:0005811|GO:0016298|GO:0019915	PTHR13390	LIPASE	NA	NA
5324	COBS10780	499.946	1.29084	0.292284	4.47019	7.81e-06	0.000788853	UP	IPR029058	Alpha/Beta hydrolase fold	-	NA	NA	NA	NA
564	COBS01433	4696.39	1.28618	0.334282	3.67221	0.000240459	0.0106277	UP	-	-		NA	NA	NA	NA
2049	COBS04661	619.684	1.27165	0.360676	3.47216	0.000516281	0.0175985	UP	-	-		PTHR12475,PTHR12475:SF2	-,PROTEIN THEM6	NA	NA
2050	COBS04661	619.684	1.27165	0.360676	3.47216	0.000516281	0.0175985	UP	IPR029069	HotDog domain superfamily	-	NA	NA	NA	NA
2077	COBS04809	504.524	1.26746	0.232238	4.89505	9.83e-07	0.000141076	UP	IPR007667	Hypoxia induced protein, domain	-	NA	NA	NA	NA
2078	COBS04809	504.524	1.26746	0.232238	4.89505	9.83e-07	0.000141076	UP	-	-		PTHR12297:SF3,PTHR12297	HIG1 DOMAIN FAMILY MEMBER 2A,HYPOXIA-INDUCBILE GENE 1 HIG1 -RELATED	NA	NA
5728	COBS11889	2541.16	1.26287	0.28292	4.35264	1.35e-05	0.00119577	UP	IPR008253	Marvel domain	GO:0016020	NA	NA	NA	NA
5730	COBS11889	2541.16	1.26287	0.28292	4.35264	1.35e-05	0.00119577	UP	-	-		PTHR22776,PTHR22776:SF78	MARVEL-CONTAINING POTENTIAL LIPID RAFT-ASSOCIATED PROTEIN,RE01453P	NA	NA
5731	COBS11889	2541.16	1.26287	0.28292	4.35264	1.35e-05	0.00119577	UP	-	-		PTHR22776:SF78,PTHR22776	RE01453P,MARVEL-CONTAINING POTENTIAL LIPID RAFT-ASSOCIATED PROTEIN	NA	NA
6119	COBS13647	898.69	1.25166	0.343772	3.72486	0.000195423	0.0092004	UP	-	-		PTHR48021:SF46,PTHR48021	FACILITATED TREHALOSE TRANSPORTER TRET1-2 HOMOLOG-LIKE PROTEIN,-	NA	NA
6120	COBS13647	898.69	1.25166	0.343772	3.72486	0.000195423	0.0092004	UP	IPR005828	Major facilitator, sugar transporter-like	GO:0016021|GO:0022857|GO:0055085	NA	NA	NA	NA
6121	COBS13647	898.69	1.25166	0.343772	3.72486	0.000195423	0.0092004	UP	IPR005829	Sugar transporter, conserved site	GO:0016021|GO:0022857|GO:0055085	NA	NA	NA	NA
6122	COBS13647	898.69	1.25166	0.343772	3.72486	0.000195423	0.0092004	UP	IPR003663	Sugar/inositol transporter	GO:0016020|GO:0022857|GO:0055085	NA	NA	NA	NA
6123	COBS13647	898.69	1.25166	0.343772	3.72486	0.000195423	0.0092004	UP	IPR036259	MFS transporter superfamily	-	NA	NA	NA	NA
6124	COBS13647	898.69	1.25166	0.343772	3.72486	0.000195423	0.0092004	UP	IPR020846	Major facilitator superfamily domain	GO:0022857	NA	NA	NA	NA
4945	COBS10293	3939.51	1.24811	0.329285	3.43188	0.000599413	0.0195384	UP	IPR002048	EF-hand domain	GO:0005509	NA	NA	NA	NA
4947	COBS10293	3939.51	1.24811	0.329285	3.43188	0.000599413	0.0195384	UP	IPR018247	EF-Hand 1, calcium-binding site	-	NA	NA	NA	NA
4948	COBS10293	3939.51	1.24811	0.329285	3.43188	0.000599413	0.0195384	UP	IPR011992	EF-hand domain pair	-	NA	NA	NA	NA
4949	COBS10293	3939.51	1.24811	0.329285	3.43188	0.000599413	0.0195384	UP	-	-		PTHR23050,PTHR23050:SF244	CALCIUM BINDING PROTEIN,TROPONIN C, ISOFORM 2-RELATED	NA	NA
4957	COBS10293	3939.51	1.24811	0.329285	3.43188	0.000599413	0.0195384	UP	-	-		PTHR23050:SF244,PTHR23050	TROPONIN C, ISOFORM 2-RELATED,CALCIUM BINDING PROTEIN	NA	NA
7217	COBS15619	3158.29	1.23546	0.434807	3.47883	0.0005036	0.01741	UP	IPR020628	Formate-tetrahydrofolate ligase, FTHFS, conserved site	GO:0005524	NA	NA	K00288	methylenetetrahydrofolate dehydrogenase (NADP+) / methenyltetrahydrofolate cyclohydrolase / formyltetrahydrofolate synthetase [EC:1.5.1.5 3.5.4.9 6.3.4.3]
7218	COBS15619	3158.29	1.23546	0.434807	3.47883	0.0005036	0.01741	UP	IPR036291	NAD(P)-binding domain superfamily	-	NA	NA	K00288	methylenetetrahydrofolate dehydrogenase (NADP+) / methenyltetrahydrofolate cyclohydrolase / formyltetrahydrofolate synthetase [EC:1.5.1.5 3.5.4.9 6.3.4.3]
7219	COBS15619	3158.29	1.23546	0.434807	3.47883	0.0005036	0.01741	UP	IPR046346	Aminoacid dehydrogenase-like, N-terminal domain superfamily	-	NA	NA	K00288	methylenetetrahydrofolate dehydrogenase (NADP+) / methenyltetrahydrofolate cyclohydrolase / formyltetrahydrofolate synthetase [EC:1.5.1.5 3.5.4.9 6.3.4.3]
7220	COBS15619	3158.29	1.23546	0.434807	3.47883	0.0005036	0.01741	UP	IPR000672	Tetrahydrofolate dehydrogenase/cyclohydrolase	GO:0004488	NA	NA	K00288	methylenetetrahydrofolate dehydrogenase (NADP+) / methenyltetrahydrofolate cyclohydrolase / formyltetrahydrofolate synthetase [EC:1.5.1.5 3.5.4.9 6.3.4.3]
7221	COBS15619	3158.29	1.23546	0.434807	3.47883	0.0005036	0.01741	UP	-	-		PTHR48099:SF1,PTHR48099	C-1-TETRAHYDROFOLATE SYNTHASE, CYTOPLASMIC,C-1-TETRAHYDROFOLATE SYNTHASE, CYTOPLASMIC-RELATED	K00288	methylenetetrahydrofolate dehydrogenase (NADP+) / methenyltetrahydrofolate cyclohydrolase / formyltetrahydrofolate synthetase [EC:1.5.1.5 3.5.4.9 6.3.4.3]
7222	COBS15619	3158.29	1.23546	0.434807	3.47883	0.0005036	0.01741	UP	IPR020867	Tetrahydrofolate dehydrogenase/cyclohydrolase, conserved site	GO:0003824	NA	NA	K00288	methylenetetrahydrofolate dehydrogenase (NADP+) / methenyltetrahydrofolate cyclohydrolase / formyltetrahydrofolate synthetase [EC:1.5.1.5 3.5.4.9 6.3.4.3]
7223	COBS15619	3158.29	1.23546	0.434807	3.47883	0.0005036	0.01741	UP	IPR020630	Tetrahydrofolate dehydrogenase/cyclohydrolase, catalytic domain	GO:0004488	NA	NA	K00288	methylenetetrahydrofolate dehydrogenase (NADP+) / methenyltetrahydrofolate cyclohydrolase / formyltetrahydrofolate synthetase [EC:1.5.1.5 3.5.4.9 6.3.4.3]
7227	COBS15619	3158.29	1.23546	0.434807	3.47883	0.0005036	0.01741	UP	IPR020631	Tetrahydrofolate dehydrogenase/cyclohydrolase, NAD(P)-binding domain	GO:0004488	NA	NA	K00288	methylenetetrahydrofolate dehydrogenase (NADP+) / methenyltetrahydrofolate cyclohydrolase / formyltetrahydrofolate synthetase [EC:1.5.1.5 3.5.4.9 6.3.4.3]
7228	COBS15619	3158.29	1.23546	0.434807	3.47883	0.0005036	0.01741	UP	IPR027417	P-loop containing nucleoside triphosphate hydrolase	-	NA	NA	K00288	methylenetetrahydrofolate dehydrogenase (NADP+) / methenyltetrahydrofolate cyclohydrolase / formyltetrahydrofolate synthetase [EC:1.5.1.5 3.5.4.9 6.3.4.3]
7231	COBS15619	3158.29	1.23546	0.434807	3.47883	0.0005036	0.01741	UP	IPR000559	Formate-tetrahydrofolate ligase, FTHFS	GO:0004329|GO:0005524	NA	NA	K00288	methylenetetrahydrofolate dehydrogenase (NADP+) / methenyltetrahydrofolate cyclohydrolase / formyltetrahydrofolate synthetase [EC:1.5.1.5 3.5.4.9 6.3.4.3]
7561	COBS16850	667.293	1.23235	0.330952	3.34907	0.00081082	0.0244097	UP	-	-		PTHR23291:SF50	PROTEIN LIFEGUARD 4	K24205	protein lifeguard
7562	COBS16850	667.293	1.23235	0.330952	3.34907	0.00081082	0.0244097	UP	IPR006214	Bax inhibitor 1-related	-	PTHR23291	BAX INHIBITOR-RELATED	K24205	protein lifeguard
3727	COBS08016	8631.89	1.22792	0.442544	3.20083	0.0013703	0.0338701	UP	-	-		PTHR11063:SF8,PTHR11063	DELTA-1-PYRROLINE-5-CARBOXYLATE SYNTHASE,GLUTAMATE SEMIALDEHYDE DEHYDROGENASE	K12657	delta-1-pyrroline-5-carboxylate synthetase [EC:2.7.2.11 1.2.1.41]
3728	COBS08016	8631.89	1.22792	0.442544	3.20083	0.0013703	0.0338701	UP	IPR041744	Bifunctional delta 1-pyrroline-5-carboxylate synthetase, glutamate-5-kinase domain	-	NA	NA	K12657	delta-1-pyrroline-5-carboxylate synthetase [EC:2.7.2.11 1.2.1.41]
3729	COBS08016	8631.89	1.22792	0.442544	3.20083	0.0013703	0.0338701	UP	IPR001048	Aspartate/glutamate/uridylate kinase	-	NA	NA	K12657	delta-1-pyrroline-5-carboxylate synthetase [EC:2.7.2.11 1.2.1.41]
3730	COBS08016	8631.89	1.22792	0.442544	3.20083	0.0013703	0.0338701	UP	IPR016162	Aldehyde dehydrogenase, N-terminal	GO:0016491	NA	NA	K12657	delta-1-pyrroline-5-carboxylate synthetase [EC:2.7.2.11 1.2.1.41]
3731	COBS08016	8631.89	1.22792	0.442544	3.20083	0.0013703	0.0338701	UP	IPR005715	Glutamate 5-kinase/delta-1-pyrroline-5-carboxylate synthase	GO:0005737|GO:0006561	NA	NA	K12657	delta-1-pyrroline-5-carboxylate synthetase [EC:2.7.2.11 1.2.1.41]
3732	COBS08016	8631.89	1.22792	0.442544	3.20083	0.0013703	0.0338701	UP	IPR001057	Glutamate/acetylglutamate kinase	GO:0005524|GO:0016301	NA	NA	K12657	delta-1-pyrroline-5-carboxylate synthetase [EC:2.7.2.11 1.2.1.41]
3733	COBS08016	8631.89	1.22792	0.442544	3.20083	0.0013703	0.0338701	UP	IPR016161	Aldehyde/histidinol dehydrogenase	GO:0016491	NA	NA	K12657	delta-1-pyrroline-5-carboxylate synthetase [EC:2.7.2.11 1.2.1.41]
3734	COBS08016	8631.89	1.22792	0.442544	3.20083	0.0013703	0.0338701	UP	IPR000965	GPR domain	GO:0004350|GO:0006561	NA	NA	K12657	delta-1-pyrroline-5-carboxylate synthetase [EC:2.7.2.11 1.2.1.41]
3735	COBS08016	8631.89	1.22792	0.442544	3.20083	0.0013703	0.0338701	UP	IPR016163	Aldehyde dehydrogenase, C-terminal	GO:0016620	NA	NA	K12657	delta-1-pyrroline-5-carboxylate synthetase [EC:2.7.2.11 1.2.1.41]
3736	COBS08016	8631.89	1.22792	0.442544	3.20083	0.0013703	0.0338701	UP	IPR020593	Gamma-glutamyl phosphate reductase GPR, conserved site	GO:0004350|GO:0006561	NA	NA	K12657	delta-1-pyrroline-5-carboxylate synthetase [EC:2.7.2.11 1.2.1.41]
3737	COBS08016	8631.89	1.22792	0.442544	3.20083	0.0013703	0.0338701	UP	IPR036393	Acetylglutamate kinase-like superfamily	-	NA	NA	K12657	delta-1-pyrroline-5-carboxylate synthetase [EC:2.7.2.11 1.2.1.41]
3738	COBS08016	8631.89	1.22792	0.442544	3.20083	0.0013703	0.0338701	UP	IPR005766	Delta l-pyrroline-5-carboxylate synthetase	GO:0003824|GO:0006561	NA	NA	K12657	delta-1-pyrroline-5-carboxylate synthetase [EC:2.7.2.11 1.2.1.41]
3739	COBS08016	8631.89	1.22792	0.442544	3.20083	0.0013703	0.0338701	UP	IPR015590	Aldehyde dehydrogenase domain	GO:0016491	NA	NA	K12657	delta-1-pyrroline-5-carboxylate synthetase [EC:2.7.2.11 1.2.1.41]
3740	COBS08016	8631.89	1.22792	0.442544	3.20083	0.0013703	0.0338701	UP	IPR019797	Glutamate 5-kinase, conserved site	GO:0004349|GO:0006561	NA	NA	K12657	delta-1-pyrroline-5-carboxylate synthetase [EC:2.7.2.11 1.2.1.41]
7652	COBS17492	936.348	1.2202	0.304713	3.91986	8.86e-05	0.00533166	UP	-	-		PTHR10891:SF764,PTHR10891	CALPAIN-B-LIKE PROTEIN,EF-HAND CALCIUM-BINDING DOMAIN CONTAINING PROTEIN	K23902	programmed cell death protein 6
7653	COBS17492	936.348	1.2202	0.304713	3.91986	8.86e-05	0.00533166	UP	IPR018247	EF-Hand 1, calcium-binding site	-	NA	NA	K23902	programmed cell death protein 6
7655	COBS17492	936.348	1.2202	0.304713	3.91986	8.86e-05	0.00533166	UP	-	-		PTHR46212:SF4,PTHR46212	PROGRAMMED CELL DEATH 6,PEFLIN	K23902	programmed cell death protein 6
7656	COBS17492	936.348	1.2202	0.304713	3.91986	8.86e-05	0.00533166	UP	IPR002048	EF-hand domain	GO:0005509	NA	NA	K23902	programmed cell death protein 6
7658	COBS17492	936.348	1.2202	0.304713	3.91986	8.86e-05	0.00533166	UP	IPR011992	EF-hand domain pair	-	NA	NA	K23902	programmed cell death protein 6
6355	COBS14676	4498.24	1.2071	0.456743	3.15571	0.00160109	0.0380982	UP	IPR013806	Kringle-like fold	-	NA	NA	K23489	HGF/MSP/plasminogen-like protein
6356	COBS14676	4498.24	1.2071	0.456743	3.15571	0.00160109	0.0380982	UP	IPR017448	SRCR-like domain	GO:0016020	NA	NA	K23489	HGF/MSP/plasminogen-like protein
6357	COBS14676	4498.24	1.2071	0.456743	3.15571	0.00160109	0.0380982	UP	IPR009003	Peptidase S1, PA clan	-	NA	NA	K23489	HGF/MSP/plasminogen-like protein
6358	COBS14676	4498.24	1.2071	0.456743	3.15571	0.00160109	0.0380982	UP	IPR001190	SRCR domain	GO:0005044|GO:0016020	NA	NA	K23489	HGF/MSP/plasminogen-like protein
6359	COBS14676	4498.24	1.2071	0.456743	3.15571	0.00160109	0.0380982	UP	IPR036508	Chitin binding domain superfamily	GO:0008061	NA	NA	K23489	HGF/MSP/plasminogen-like protein
6360	COBS14676	4498.24	1.2071	0.456743	3.15571	0.00160109	0.0380982	UP	IPR023415	Low-density lipoprotein (LDL) receptor class A, conserved site	-	NA	NA	K23489	HGF/MSP/plasminogen-like protein
6361	COBS14676	4498.24	1.2071	0.456743	3.15571	0.00160109	0.0380982	UP	IPR003609	PAN/Apple domain	-	NA	NA	K23489	HGF/MSP/plasminogen-like protein
6362	COBS14676	4498.24	1.2071	0.456743	3.15571	0.00160109	0.0380982	UP	IPR036055	LDL receptor-like superfamily	GO:0005515	NA	NA	K23489	HGF/MSP/plasminogen-like protein
6363	COBS14676	4498.24	1.2071	0.456743	3.15571	0.00160109	0.0380982	UP	IPR033116	Serine proteases, trypsin family, serine active site	-	NA	NA	K23489	HGF/MSP/plasminogen-like protein
6365	COBS14676	4498.24	1.2071	0.456743	3.15571	0.00160109	0.0380982	UP	-	-		PTHR24258,PTHR24258:SF128	SERINE PROTEASE-RELATED,TEQUILA, ISOFORM G	K23489	HGF/MSP/plasminogen-like protein
6366	COBS14676	4498.24	1.2071	0.456743	3.15571	0.00160109	0.0380982	UP	IPR016186	C-type lectin-like/link domain superfamily	-	NA	NA	K23489	HGF/MSP/plasminogen-like protein
6367	COBS14676	4498.24	1.2071	0.456743	3.15571	0.00160109	0.0380982	UP	IPR009003	Peptidase S1, PA clan	-	NA	NA	NA	NA
6370	COBS14676	4498.24	1.2071	0.456743	3.15571	0.00160109	0.0380982	UP	IPR001304	C-type lectin-like	-	NA	NA	K23489	HGF/MSP/plasminogen-like protein
6371	COBS14676	4498.24	1.2071	0.456743	3.15571	0.00160109	0.0380982	UP	IPR016187	C-type lectin fold	-	NA	NA	K23489	HGF/MSP/plasminogen-like protein
6372	COBS14676	4498.24	1.2071	0.456743	3.15571	0.00160109	0.0380982	UP	IPR000001	Kringle	-	NA	NA	K23489	HGF/MSP/plasminogen-like protein
6373	COBS14676	4498.24	1.2071	0.456743	3.15571	0.00160109	0.0380982	UP	IPR001254	Serine proteases, trypsin domain	GO:0004252|GO:0006508	NA	NA	K23489	HGF/MSP/plasminogen-like protein
6374	COBS14676	4498.24	1.2071	0.456743	3.15571	0.00160109	0.0380982	UP	IPR018114	Serine proteases, trypsin family, histidine active site	GO:0004252|GO:0006508	NA	NA	K23489	HGF/MSP/plasminogen-like protein
6375	COBS14676	4498.24	1.2071	0.456743	3.15571	0.00160109	0.0380982	UP	IPR002172	Low-density lipoprotein (LDL) receptor class A repeat	GO:0005515	NA	NA	K23489	HGF/MSP/plasminogen-like protein
6381	COBS14676	4498.24	1.2071	0.456743	3.15571	0.00160109	0.0380982	UP	IPR038178	Kringle superfamily	-	NA	NA	K23489	HGF/MSP/plasminogen-like protein
6382	COBS14676	4498.24	1.2071	0.456743	3.15571	0.00160109	0.0380982	UP	-	-		PTHR24258:SF128,PTHR24258	TEQUILA, ISOFORM G,SERINE PROTEASE-RELATED	NA	NA
6383	COBS14676	4498.24	1.2071	0.456743	3.15571	0.00160109	0.0380982	UP	IPR002557	Chitin binding domain	GO:0005576|GO:0008061	NA	NA	K23489	HGF/MSP/plasminogen-like protein
6387	COBS14676	4498.24	1.2071	0.456743	3.15571	0.00160109	0.0380982	UP	IPR043504	Peptidase S1, PA clan, chymotrypsin-like fold	-	NA	NA	K23489	HGF/MSP/plasminogen-like protein
6392	COBS14676	4498.24	1.2071	0.456743	3.15571	0.00160109	0.0380982	UP	IPR036772	SRCR-like domain superfamily	GO:0016020	NA	NA	K23489	HGF/MSP/plasminogen-like protein
6402	COBS14676	4498.24	1.2071	0.456743	3.15571	0.00160109	0.0380982	UP	-	-		PTHR24258:SF128,PTHR24258	TEQUILA, ISOFORM G,SERINE PROTEASE-RELATED	K23489	HGF/MSP/plasminogen-like protein
6414	COBS14676	4498.24	1.2071	0.456743	3.15571	0.00160109	0.0380982	UP	IPR001254	Serine proteases, trypsin domain	GO:0004252|GO:0006508	NA	NA	NA	NA
6415	COBS14676	4498.24	1.2071	0.456743	3.15571	0.00160109	0.0380982	UP	IPR043504	Peptidase S1, PA clan, chymotrypsin-like fold	-	NA	NA	NA	NA
6418	COBS14676	4498.24	1.2071	0.456743	3.15571	0.00160109	0.0380982	UP	IPR033116	Serine proteases, trypsin family, serine active site	-	NA	NA	NA	NA
4995	COBS10395	13339.3	1.20707	0.319141	3.91163	9.17e-05	0.00549564	UP	IPR015946	K homology domain-like, alpha/beta	-	NA	NA	K02985	small subunit ribosomal protein S3e
4996	COBS10395	13339.3	1.20707	0.319141	3.91163	9.17e-05	0.00549564	UP	IPR001351	Ribosomal protein S3, C-terminal	GO:0003735|GO:0006412	NA	NA	K02985	small subunit ribosomal protein S3e
4997	COBS10395	13339.3	1.20707	0.319141	3.91163	9.17e-05	0.00549564	UP	IPR036419	Ribosomal protein S3, C-terminal domain superfamily	-	NA	NA	K02985	small subunit ribosomal protein S3e
4998	COBS10395	13339.3	1.20707	0.319141	3.91163	9.17e-05	0.00549564	UP	-	-		PTHR11760,PTHR11760:SF36	30S/40S RIBOSOMAL PROTEIN S3,40S RIBOSOMAL PROTEIN S3	K02985	small subunit ribosomal protein S3e
4999	COBS10395	13339.3	1.20707	0.319141	3.91163	9.17e-05	0.00549564	UP	IPR004044	K Homology domain, type 2	GO:0003723	NA	NA	K02985	small subunit ribosomal protein S3e
5000	COBS10395	13339.3	1.20707	0.319141	3.91163	9.17e-05	0.00549564	UP	IPR005703	Ribosomal protein S3, eukaryotic/archaeal	GO:0003735|GO:0006412|GO:0015935	NA	NA	K02985	small subunit ribosomal protein S3e
5001	COBS10395	13339.3	1.20707	0.319141	3.91163	9.17e-05	0.00549564	UP	IPR009019	K homology domain superfamily, prokaryotic type	GO:0003723	NA	NA	K02985	small subunit ribosomal protein S3e
6011	COBS13062	1115.15	1.19912	0.354508	3.74101	0.00018328	0.0088234	UP	IPR018120	Glycoside hydrolase family 1, active site	-	NA	NA	NA	NA
6012	COBS13062	1115.15	1.19912	0.354508	3.74101	0.00018328	0.0088234	UP	IPR017853	Glycoside hydrolase superfamily	-	NA	NA	NA	NA
6013	COBS13062	1115.15	1.19912	0.354508	3.74101	0.00018328	0.0088234	UP	IPR033132	Glycosyl hydrolases family 1, N-terminal conserved site	-	NA	NA	NA	NA
6014	COBS13062	1115.15	1.19912	0.354508	3.74101	0.00018328	0.0088234	UP	-	-		PTHR10353:SF38	LACTASE-PHLORIZIN HYDROLASE	NA	NA
6015	COBS13062	1115.15	1.19912	0.354508	3.74101	0.00018328	0.0088234	UP	IPR001360	Glycoside hydrolase family 1	GO:0004553|GO:0005975	PTHR10353	GLYCOSYL HYDROLASE	NA	NA
7526	COBS16771	1010.66	1.19121	0.244397	4.95198	7.35e-07	0.000109468	UP	IPR017379	PDZ domain-containing protein GIPC1/2/3	-	PTHR12259	RGS-GAIP INTERACTING PROTEIN GIPC	K20056	PDZ domain-containing protein GIPC
7527	COBS16771	1010.66	1.19121	0.244397	4.95198	7.35e-07	0.000109468	UP	IPR001478	PDZ domain	GO:0005515	NA	NA	K20056	PDZ domain-containing protein GIPC
7528	COBS16771	1010.66	1.19121	0.244397	4.95198	7.35e-07	0.000109468	UP	IPR036034	PDZ superfamily	GO:0005515	NA	NA	K20056	PDZ domain-containing protein GIPC
7529	COBS16771	1010.66	1.19121	0.244397	4.95198	7.35e-07	0.000109468	UP	-	-		PTHR12259:SF1	GH21964P	K20056	PDZ domain-containing protein GIPC
5696	COBS11599	1212.42	1.18669	0.33121	3.34433	0.000824826	0.0245831	UP	-	-		PTHR11158:SF29	PRELI DOMAIN-CONTAINING PROTEIN 1, MITOCHONDRIAL	NA	NA
5697	COBS11599	1212.42	1.18669	0.33121	3.34433	0.000824826	0.0245831	UP	IPR037365	Slowmo/Ups family	GO:0005758	PTHR11158	MSF1/PX19 RELATED	NA	NA
5698	COBS11599	1212.42	1.18669	0.33121	3.34433	0.000824826	0.0245831	UP	IPR006797	PRELI/MSF1 domain	-	NA	NA	NA	NA
3396	COBS07087	572.248	1.18544	0.390048	3.07875	0.00207872	0.0448851	UP	IPR001950	SUI1 domain	GO:0003743|GO:0006413	NA	NA	K15027	translation initiation factor 2D
3397	COBS07087	572.248	1.18544	0.390048	3.07875	0.00207872	0.0448851	UP	IPR039759	Eukaryotic translation initiation factor 2D, SUI1 domain	-	NA	NA	K15027	translation initiation factor 2D
3398	COBS07087	572.248	1.18544	0.390048	3.07875	0.00207872	0.0448851	UP	IPR036885	SWIB/MDM2 domain superfamily	-	NA	NA	K15027	translation initiation factor 2D
3399	COBS07087	572.248	1.18544	0.390048	3.07875	0.00207872	0.0448851	UP	IPR041366	Pre-PUA domain	-	NA	NA	K15027	translation initiation factor 2D
3400	COBS07087	572.248	1.18544	0.390048	3.07875	0.00207872	0.0448851	UP	IPR039757	Eukaryotic translation initiation factor 2D	GO:0001731|GO:0003743	PTHR12217	EUKARYOTIC TRANSLATION INITIATION FACTOR 2D	K15027	translation initiation factor 2D
3401	COBS07087	572.248	1.18544	0.390048	3.07875	0.00207872	0.0448851	UP	IPR004521	Uncharacterised domain CHP00451	GO:0003723	NA	NA	K15027	translation initiation factor 2D
3402	COBS07087	572.248	1.18544	0.390048	3.07875	0.00207872	0.0448851	UP	IPR015947	PUA-like superfamily	-	NA	NA	K15027	translation initiation factor 2D
3403	COBS07087	572.248	1.18544	0.390048	3.07875	0.00207872	0.0448851	UP	IPR036877	SUI1 domain superfamily	GO:0003743|GO:0006413	NA	NA	K15027	translation initiation factor 2D
3404	COBS07087	572.248	1.18544	0.390048	3.07875	0.00207872	0.0448851	UP	-	-		NA	NA	K15027	translation initiation factor 2D
2826	COBS06112	6360.07	1.17883	0.356622	3.22634	0.00125382	0.0322654	UP	IPR012988	Ribosomal protein L30, N-terminal	-	NA	NA	K02937	large subunit ribosomal protein L7e
2827	COBS06112	6360.07	1.17883	0.356622	3.22634	0.00125382	0.0322654	UP	IPR005998	Ribosomal protein L7, eukaryotic	GO:0000463|GO:0003735|GO:0022625	NA	NA	K02937	large subunit ribosomal protein L7e
2828	COBS06112	6360.07	1.17883	0.356622	3.22634	0.00125382	0.0322654	UP	IPR035808	Ribosomal protein L7, eukaryotic/archaeal	-	NA	NA	K02937	large subunit ribosomal protein L7e
2829	COBS06112	6360.07	1.17883	0.356622	3.22634	0.00125382	0.0322654	UP	IPR039699	Ribosomal protein L7/L30	-	PTHR11524	60S RIBOSOMAL PROTEIN L7	K02937	large subunit ribosomal protein L7e
2830	COBS06112	6360.07	1.17883	0.356622	3.22634	0.00125382	0.0322654	UP	IPR018038	Ribosomal protein L30, conserved site	-	NA	NA	K02937	large subunit ribosomal protein L7e
2831	COBS06112	6360.07	1.17883	0.356622	3.22634	0.00125382	0.0322654	UP	IPR016082	Ribosomal protein L30, ferredoxin-like fold domain	-	NA	NA	K02937	large subunit ribosomal protein L7e
2832	COBS06112	6360.07	1.17883	0.356622	3.22634	0.00125382	0.0322654	UP	IPR036919	Ribosomal protein L30, ferredoxin-like fold domain superfamily	-	NA	NA	K02937	large subunit ribosomal protein L7e
2833	COBS06112	6360.07	1.17883	0.356622	3.22634	0.00125382	0.0322654	UP	-	-		NA	NA	K02937	large subunit ribosomal protein L7e
4805	COBS09842	4657.37	1.17407	0.366403	3.77157	0.000162227	0.00817095	UP	IPR000668	Peptidase C1A, papain C-terminal	GO:0006508|GO:0008234	NA	NA	K01365	cathepsin L [EC:3.4.22.15]
4806	COBS09842	4657.37	1.17407	0.366403	3.77157	0.000162227	0.00817095	UP	IPR013201	Cathepsin propeptide inhibitor domain (I29)	-	NA	NA	K01365	cathepsin L [EC:3.4.22.15]
4807	COBS09842	4657.37	1.17407	0.366403	3.77157	0.000162227	0.00817095	UP	IPR038765	Papain-like cysteine peptidase superfamily	-	NA	NA	K01365	cathepsin L [EC:3.4.22.15]
4808	COBS09842	4657.37	1.17407	0.366403	3.77157	0.000162227	0.00817095	UP	IPR025661	Cysteine peptidase, asparagine active site	-	NA	NA	K01365	cathepsin L [EC:3.4.22.15]
4809	COBS09842	4657.37	1.17407	0.366403	3.77157	0.000162227	0.00817095	UP	IPR039417	Papain-like cysteine endopeptidase	-	NA	NA	K01365	cathepsin L [EC:3.4.22.15]
4810	COBS09842	4657.37	1.17407	0.366403	3.77157	0.000162227	0.00817095	UP	-	-		PTHR12411,PTHR12411:SF57	CYSTEINE PROTEASE FAMILY C1-RELATED,CATHEPSIN L1	K01365	cathepsin L [EC:3.4.22.15]
4811	COBS09842	4657.37	1.17407	0.366403	3.77157	0.000162227	0.00817095	UP	IPR000169	Cysteine peptidase, cysteine active site	-	NA	NA	K01365	cathepsin L [EC:3.4.22.15]
4812	COBS09842	4657.37	1.17407	0.366403	3.77157	0.000162227	0.00817095	UP	IPR025660	Cysteine peptidase, histidine active site	-	NA	NA	K01365	cathepsin L [EC:3.4.22.15]
442	COBS01382	3216.24	1.17121	0.291781	3.45526	0.000549754	0.018408	UP	-	-		PTHR43884:SF11,PTHR43884	VERY LONG-CHAIN SPECIFIC ACYL-COA DEHYDROGENASE, MITOCHONDRIAL,ACYL-COA DEHYDROGENASE	K09479	very long chain acyl-CoA dehydrogenase [EC:1.3.8.9]
443	COBS01382	3216.24	1.17121	0.291781	3.45526	0.000549754	0.018408	UP	IPR013786	Acyl-CoA dehydrogenase/oxidase, N-terminal	GO:0016627|GO:0050660	NA	NA	K09479	very long chain acyl-CoA dehydrogenase [EC:1.3.8.9]
444	COBS01382	3216.24	1.17121	0.291781	3.45526	0.000549754	0.018408	UP	IPR037069	Acyl-CoA dehydrogenase/oxidase, N-terminal domain superfamily	GO:0016627|GO:0050660	NA	NA	K09479	very long chain acyl-CoA dehydrogenase [EC:1.3.8.9]
445	COBS01382	3216.24	1.17121	0.291781	3.45526	0.000549754	0.018408	UP	IPR009075	Acyl-CoA dehydrogenase/oxidase C-terminal	GO:0016627	NA	NA	K09479	very long chain acyl-CoA dehydrogenase [EC:1.3.8.9]
446	COBS01382	3216.24	1.17121	0.291781	3.45526	0.000549754	0.018408	UP	IPR006089	Acyl-CoA dehydrogenase, conserved site	GO:0003995	NA	NA	K09479	very long chain acyl-CoA dehydrogenase [EC:1.3.8.9]
447	COBS01382	3216.24	1.17121	0.291781	3.45526	0.000549754	0.018408	UP	IPR036250	Acyl-CoA dehydrogenase-like, C-terminal	GO:0016627	NA	NA	K09479	very long chain acyl-CoA dehydrogenase [EC:1.3.8.9]
448	COBS01382	3216.24	1.17121	0.291781	3.45526	0.000549754	0.018408	UP	IPR006091	Acyl-CoA oxidase/dehydrogenase, middle domain	GO:0016627	NA	NA	K09479	very long chain acyl-CoA dehydrogenase [EC:1.3.8.9]
449	COBS01382	3216.24	1.17121	0.291781	3.45526	0.000549754	0.018408	UP	IPR009100	Acyl-CoA dehydrogenase/oxidase, N-terminal and middle domain superfamily	GO:0016627	NA	NA	K09479	very long chain acyl-CoA dehydrogenase [EC:1.3.8.9]
450	COBS01382	3216.24	1.17121	0.291781	3.45526	0.000549754	0.018408	UP	IPR046373	Acyl-CoA oxidase/dehydrogenase, middle domain superfamily	GO:0016627	NA	NA	K09479	very long chain acyl-CoA dehydrogenase [EC:1.3.8.9]
2650	COBS05649	2451.71	1.17029	0.294295	4.12171	3.76e-05	0.00271156	UP	-	-		PTHR23427:SF1	SURFEIT LOCUS PROTEIN 4	K20369	ER-derived vesicles protein
2652	COBS05649	2451.71	1.17029	0.294295	4.12171	3.76e-05	0.00271156	UP	IPR045214	Surfeit locus 1/4	-	PTHR23427	SURFEIT LOCUS PROTEIN	K20369	ER-derived vesicles protein
2654	COBS05649	2451.71	1.17029	0.294295	4.12171	3.76e-05	0.00271156	UP	IPR002995	Surfeit locus 4	GO:0016021	NA	NA	K20369	ER-derived vesicles protein
2692	COBS05791	459.191	1.16881	0.330163	3.51028	0.000447629	0.0160633	UP	IPR036249	Thioredoxin-like superfamily	-	NA	NA	K11188	peroxiredoxin 6 [EC:1.11.1.7 1.11.1.27 3.1.1.-]
2693	COBS05791	459.191	1.16881	0.330163	3.51028	0.000447629	0.0160633	UP	IPR019479	Peroxiredoxin, C-terminal	GO:0051920	NA	NA	K11188	peroxiredoxin 6 [EC:1.11.1.7 1.11.1.27 3.1.1.-]
2694	COBS05791	459.191	1.16881	0.330163	3.51028	0.000447629	0.0160633	UP	IPR045020	1-Cys peroxiredoxin	GO:0051920|GO:0098869	NA	NA	K11188	peroxiredoxin 6 [EC:1.11.1.7 1.11.1.27 3.1.1.-]
2695	COBS05791	459.191	1.16881	0.330163	3.51028	0.000447629	0.0160633	UP	IPR024706	Peroxiredoxin, AhpC-type	-	NA	NA	K11188	peroxiredoxin 6 [EC:1.11.1.7 1.11.1.27 3.1.1.-]
2696	COBS05791	459.191	1.16881	0.330163	3.51028	0.000447629	0.0160633	UP	-	-		PTHR43503,PTHR43503:SF12	MCG48959-RELATED,PEROXIREDOXIN PRX1, PUTATIVE-RELATED	K11188	peroxiredoxin 6 [EC:1.11.1.7 1.11.1.27 3.1.1.-]
2697	COBS05791	459.191	1.16881	0.330163	3.51028	0.000447629	0.0160633	UP	IPR013766	Thioredoxin domain	-	NA	NA	K11188	peroxiredoxin 6 [EC:1.11.1.7 1.11.1.27 3.1.1.-]
2698	COBS05791	459.191	1.16881	0.330163	3.51028	0.000447629	0.0160633	UP	IPR000866	Alkyl hydroperoxide reductase subunit C/ Thiol specific antioxidant	GO:0016209|GO:0016491	NA	NA	K11188	peroxiredoxin 6 [EC:1.11.1.7 1.11.1.27 3.1.1.-]
3567	COBS07529	7199.37	1.16198	0.352971	3.73482	0.000187846	0.00901547	UP	-	-		PTHR10906:SF10	PROTEIN TRANSPORT PROTEIN SEC61 SUBUNIT ALPHA ISOFORM 2	K10956	protein transport protein SEC61 subunit alpha
3568	COBS07529	7199.37	1.16198	0.352971	3.73482	0.000187846	0.00901547	UP	IPR030659	SecY conserved site	-	NA	NA	K10956	protein transport protein SEC61 subunit alpha
3569	COBS07529	7199.37	1.16198	0.352971	3.73482	0.000187846	0.00901547	UP	IPR023201	SecY domain superfamily	-	NA	NA	K10956	protein transport protein SEC61 subunit alpha
3570	COBS07529	7199.37	1.16198	0.352971	3.73482	0.000187846	0.00901547	UP	IPR002208	SecY/SEC61-alpha family	GO:0015031|GO:0016020	PTHR10906	SECY/SEC61-ALPHA FAMILY MEMBER	K10956	protein transport protein SEC61 subunit alpha
3571	COBS07529	7199.37	1.16198	0.352971	3.73482	0.000187846	0.00901547	UP	IPR019561	Translocon Sec61/SecY, plug domain	-	NA	NA	K10956	protein transport protein SEC61 subunit alpha
7488	COBS16589	3107.51	1.16079	0.335285	3.94003	8.15e-05	0.0050186	UP	IPR022673	Hexokinase, C-terminal	GO:0005524|GO:0005975|GO:0016773	NA	NA	K00844	hexokinase [EC:2.7.1.1]
7489	COBS16589	3107.51	1.16079	0.335285	3.94003	8.15e-05	0.0050186	UP	IPR043129	ATPase, nucleotide binding domain	-	NA	NA	K00844	hexokinase [EC:2.7.1.1]
7491	COBS16589	3107.51	1.16079	0.335285	3.94003	8.15e-05	0.0050186	UP	IPR001312	Hexokinase	GO:0001678|GO:0004396|GO:0005524|GO:0005536|GO:0005975	PTHR19443	HEXOKINASE	K00844	hexokinase [EC:2.7.1.1]
7492	COBS16589	3107.51	1.16079	0.335285	3.94003	8.15e-05	0.0050186	UP	IPR022672	Hexokinase, N-terminal	GO:0005524|GO:0005975|GO:0016773	NA	NA	K00844	hexokinase [EC:2.7.1.1]
7495	COBS16589	3107.51	1.16079	0.335285	3.94003	8.15e-05	0.0050186	UP	IPR019807	Hexokinase, binding site	GO:0004396|GO:0005524|GO:0006096	NA	NA	K00844	hexokinase [EC:2.7.1.1]
7498	COBS16589	3107.51	1.16079	0.335285	3.94003	8.15e-05	0.0050186	UP	-	-		PTHR19443:SF54	PHOSPHOTRANSFERASE	K00844	hexokinase [EC:2.7.1.1]
3222	COBS06745	377.265	1.15573	0.329269	3.29995	0.000967015	0.0272611	UP	IPR000719	Protein kinase domain	GO:0004672|GO:0005524|GO:0006468	NA	NA	NA	NA
3223	COBS06745	377.265	1.15573	0.329269	3.29995	0.000967015	0.0272611	UP	IPR017441	Protein kinase, ATP binding site	GO:0005524	NA	NA	NA	NA
3224	COBS06745	377.265	1.15573	0.329269	3.29995	0.000967015	0.0272611	UP	IPR011009	Protein kinase-like domain superfamily	-	NA	NA	NA	NA
3225	COBS06745	377.265	1.15573	0.329269	3.29995	0.000967015	0.0272611	UP	IPR020635	Tyrosine-protein kinase, catalytic domain	GO:0004713|GO:0006468	NA	NA	NA	NA
3226	COBS06745	377.265	1.15573	0.329269	3.29995	0.000967015	0.0272611	UP	-	-		PTHR24416:SF317,PTHR24416	MUSCLE, SKELETAL RECEPTOR TYROSINE-PROTEIN KINASE,TYROSINE-PROTEIN KINASE RECEPTOR	NA	NA
3228	COBS06745	377.265	1.15573	0.329269	3.29995	0.000967015	0.0272611	UP	IPR001245	Serine-threonine/tyrosine-protein kinase, catalytic domain	GO:0004672|GO:0006468	NA	NA	NA	NA
3235	COBS06745	377.265	1.15573	0.329269	3.29995	0.000967015	0.0272611	UP	IPR008266	Tyrosine-protein kinase, active site	GO:0004672|GO:0006468	NA	NA	NA	NA
3254	COBS06745	377.265	1.15573	0.329269	3.29995	0.000967015	0.0272611	UP	-	-		PTHR24416,PTHR24416:SF317	TYROSINE-PROTEIN KINASE RECEPTOR,MUSCLE, SKELETAL RECEPTOR TYROSINE-PROTEIN KINASE	NA	NA
1897	COBS04509	733.105	1.15478	0.364814	3.48989	0.000483215	0.0168794	UP	IPR022272	Lipocalin family conserved site	-	NA	NA	NA	NA
1898	COBS04509	733.105	1.15478	0.364814	3.48989	0.000483215	0.0168794	UP	IPR022272	Lipocalin family conserved site	-	NA	NA	K03098	apolipoprotein D and lipocalin family protein
1900	COBS04509	733.105	1.15478	0.364814	3.48989	0.000483215	0.0168794	UP	-	-		PTHR10612:SF11,PTHR10612	KARL, ISOFORM A,APOLIPOPROTEIN D	NA	NA
1901	COBS04509	733.105	1.15478	0.364814	3.48989	0.000483215	0.0168794	UP	-	-		PTHR10612:SF11,PTHR10612	KARL, ISOFORM A,APOLIPOPROTEIN D	K03098	apolipoprotein D and lipocalin family protein
1902	COBS04509	733.105	1.15478	0.364814	3.48989	0.000483215	0.0168794	UP	-	-		PTHR10612,PTHR10612:SF11	APOLIPOPROTEIN D,KARL, ISOFORM A	K03098	apolipoprotein D and lipocalin family protein
1903	COBS04509	733.105	1.15478	0.364814	3.48989	0.000483215	0.0168794	UP	IPR012674	Calycin	-	NA	NA	NA	NA
1904	COBS04509	733.105	1.15478	0.364814	3.48989	0.000483215	0.0168794	UP	IPR012674	Calycin	-	NA	NA	K03098	apolipoprotein D and lipocalin family protein
6043	COBS13588	1461	1.15332	0.296974	4.04996	5.12e-05	0.00345588	UP	IPR015795	Pyruvate kinase, C-terminal	-	NA	NA	K00873	pyruvate kinase [EC:2.7.1.40]
6044	COBS13588	1461	1.15332	0.296974	4.04996	5.12e-05	0.00345588	UP	IPR036918	Pyruvate kinase, C-terminal domain superfamily	-	NA	NA	K00873	pyruvate kinase [EC:2.7.1.40]
6045	COBS13588	1461	1.15332	0.296974	4.04996	5.12e-05	0.00345588	UP	IPR018209	Pyruvate kinase, active site	GO:0004743|GO:0006096	NA	NA	K00873	pyruvate kinase [EC:2.7.1.40]
6046	COBS13588	1461	1.15332	0.296974	4.04996	5.12e-05	0.00345588	UP	IPR040442	Pyruvate kinase-like domain superfamily	-	NA	NA	K00873	pyruvate kinase [EC:2.7.1.40]
6049	COBS13588	1461	1.15332	0.296974	4.04996	5.12e-05	0.00345588	UP	IPR011037	Pyruvate kinase-like, insert domain superfamily	-	NA	NA	K00873	pyruvate kinase [EC:2.7.1.40]
6051	COBS13588	1461	1.15332	0.296974	4.04996	5.12e-05	0.00345588	UP	IPR015813	Pyruvate/Phosphoenolpyruvate kinase-like domain superfamily	GO:0003824	NA	NA	K00873	pyruvate kinase [EC:2.7.1.40]
6052	COBS13588	1461	1.15332	0.296974	4.04996	5.12e-05	0.00345588	UP	IPR015793	Pyruvate kinase, barrel	GO:0000287|GO:0004743|GO:0006096|GO:0030955	NA	NA	K00873	pyruvate kinase [EC:2.7.1.40]
6053	COBS13588	1461	1.15332	0.296974	4.04996	5.12e-05	0.00345588	UP	IPR015806	Pyruvate kinase, insert domain superfamily	GO:0004743|GO:0006096	NA	NA	K00873	pyruvate kinase [EC:2.7.1.40]
6055	COBS13588	1461	1.15332	0.296974	4.04996	5.12e-05	0.00345588	UP	IPR001697	Pyruvate kinase	GO:0000287|GO:0004743|GO:0006096|GO:0030955	PTHR11817	PYRUVATE KINASE	K00873	pyruvate kinase [EC:2.7.1.40]
6058	COBS13588	1461	1.15332	0.296974	4.04996	5.12e-05	0.00345588	UP	-	-		PTHR11817:SF100	PYRUVATE KINASE	K00873	pyruvate kinase [EC:2.7.1.40]
7870	COBS18445	436.732	1.15019	0.284664	3.51127	0.000445966	0.0160633	UP	-	-		PTHR12428:SF34	MITOCHONDRIAL INNER MEMBRANE PROTEIN OXA1L	K03217	YidC/Oxa1 family membrane protein insertase
7871	COBS18445	436.732	1.15019	0.284664	3.51127	0.000445966	0.0160633	UP	IPR028055	Membrane insertase YidC/Oxa1, C-terminal	-	NA	NA	K03217	YidC/Oxa1 family membrane protein insertase
7872	COBS18445	436.732	1.15019	0.284664	3.51127	0.000445966	0.0160633	UP	IPR001708	Membrane insertase YidC/ALB3/OXA1/COX18	GO:0016021|GO:0032977	PTHR12428	OXA1	K03217	YidC/Oxa1 family membrane protein insertase
6073	COBS13616	3874.46	1.14473	0.38935	3.27845	0.00104379	0.0289558	UP	IPR036259	MFS transporter superfamily	-	NA	NA	K14258	facilitated trehalose transporter
6074	COBS13616	3874.46	1.14473	0.38935	3.27845	0.00104379	0.0289558	UP	IPR020846	Major facilitator superfamily domain	GO:0022857	NA	NA	K14258	facilitated trehalose transporter
6075	COBS13616	3874.46	1.14473	0.38935	3.27845	0.00104379	0.0289558	UP	IPR044775	Sugar transporter ERD6/Tret1-like	GO:0008643|GO:0051119	NA	NA	K14258	facilitated trehalose transporter
6076	COBS13616	3874.46	1.14473	0.38935	3.27845	0.00104379	0.0289558	UP	IPR005828	Major facilitator, sugar transporter-like	GO:0016021|GO:0022857|GO:0055085	NA	NA	K14258	facilitated trehalose transporter
6078	COBS13616	3874.46	1.14473	0.38935	3.27845	0.00104379	0.0289558	UP	IPR003663	Sugar/inositol transporter	GO:0016020|GO:0022857|GO:0055085	NA	NA	K14258	facilitated trehalose transporter
6081	COBS13616	3874.46	1.14473	0.38935	3.27845	0.00104379	0.0289558	UP	-	-		PTHR48021,PTHR48021:SF1	-,FACILITATED TREHALOSE TRANSPORTER TRET1-1-RELATED	K14258	facilitated trehalose transporter
6083	COBS13616	3874.46	1.14473	0.38935	3.27845	0.00104379	0.0289558	UP	IPR005829	Sugar transporter, conserved site	GO:0016021|GO:0022857|GO:0055085	NA	NA	K14258	facilitated trehalose transporter
6084	COBS13616	3874.46	1.14473	0.38935	3.27845	0.00104379	0.0289558	UP	-	-		PTHR48021:SF1,PTHR48021	FACILITATED TREHALOSE TRANSPORTER TRET1-1-RELATED,-	K14258	facilitated trehalose transporter
7310	COBS15947	5416.44	1.14048	0.281951	4.07565	4.59e-05	0.00319075	UP	IPR025887	Glycoside hydrolase family 31, N-terminal domain	-	NA	NA	K01187	alpha-glucosidase [EC:3.2.1.20]
7311	COBS15947	5416.44	1.14048	0.281951	4.07565	4.59e-05	0.00319075	UP	IPR011013	Galactose mutarotase-like domain superfamily	GO:0003824|GO:0005975|GO:0030246	NA	NA	K05546	mannosyl-oligosaccharide alpha-1,3-glucosidase [EC:3.2.1.207]
7312	COBS15947	5416.44	1.14048	0.281951	4.07565	4.59e-05	0.00319075	UP	IPR030458	Glycosyl hydrolases family 31, active site	-	NA	NA	K05546	mannosyl-oligosaccharide alpha-1,3-glucosidase [EC:3.2.1.207]
7313	COBS15947	5416.44	1.14048	0.281951	4.07565	4.59e-05	0.00319075	UP	IPR011013	Galactose mutarotase-like domain superfamily	GO:0003824|GO:0005975|GO:0030246	NA	NA	K01187	alpha-glucosidase [EC:3.2.1.20]
7314	COBS15947	5416.44	1.14048	0.281951	4.07565	4.59e-05	0.00319075	UP	IPR000322	Glycoside hydrolase family 31	GO:0004553|GO:0005975	NA	NA	K05546	mannosyl-oligosaccharide alpha-1,3-glucosidase [EC:3.2.1.207]
7315	COBS15947	5416.44	1.14048	0.281951	4.07565	4.59e-05	0.00319075	UP	IPR013780	Glycosyl hydrolase, all-beta	-	NA	NA	K05546	mannosyl-oligosaccharide alpha-1,3-glucosidase [EC:3.2.1.207]
7316	COBS15947	5416.44	1.14048	0.281951	4.07565	4.59e-05	0.00319075	UP	IPR000322	Glycoside hydrolase family 31	GO:0004553|GO:0005975	NA	NA	K01187	alpha-glucosidase [EC:3.2.1.20]
7317	COBS15947	5416.44	1.14048	0.281951	4.07565	4.59e-05	0.00319075	UP	IPR017853	Glycoside hydrolase superfamily	-	NA	NA	K05546	mannosyl-oligosaccharide alpha-1,3-glucosidase [EC:3.2.1.207]
7318	COBS15947	5416.44	1.14048	0.281951	4.07565	4.59e-05	0.00319075	UP	-	-		PTHR22762:SF54,PTHR22762	BCDNA.GH04962,ALPHA-GLUCOSIDASE	K05546	mannosyl-oligosaccharide alpha-1,3-glucosidase [EC:3.2.1.207]
7319	COBS15947	5416.44	1.14048	0.281951	4.07565	4.59e-05	0.00319075	UP	IPR013780	Glycosyl hydrolase, all-beta	-	NA	NA	K01187	alpha-glucosidase [EC:3.2.1.20]
7321	COBS15947	5416.44	1.14048	0.281951	4.07565	4.59e-05	0.00319075	UP	IPR025887	Glycoside hydrolase family 31, N-terminal domain	-	NA	NA	K05546	mannosyl-oligosaccharide alpha-1,3-glucosidase [EC:3.2.1.207]
7328	COBS15947	5416.44	1.14048	0.281951	4.07565	4.59e-05	0.00319075	UP	-	-		PTHR22762:SF54,PTHR22762	BCDNA.GH04962,ALPHA-GLUCOSIDASE	K01187	alpha-glucosidase [EC:3.2.1.20]
7330	COBS15947	5416.44	1.14048	0.281951	4.07565	4.59e-05	0.00319075	UP	IPR030458	Glycosyl hydrolases family 31, active site	-	NA	NA	K01187	alpha-glucosidase [EC:3.2.1.20]
7333	COBS15947	5416.44	1.14048	0.281951	4.07565	4.59e-05	0.00319075	UP	IPR017853	Glycoside hydrolase superfamily	-	NA	NA	K01187	alpha-glucosidase [EC:3.2.1.20]
781	COBS02061	787.807	1.13996	0.382711	3.0587	0.00222299	0.0466779	UP	IPR008958	Transglutaminase, C-terminal	GO:0003810|GO:0018149	NA	NA	K05619	transglutaminase 1 [EC:2.3.2.13]
782	COBS02061	787.807	1.13996	0.382711	3.0587	0.00222299	0.0466779	UP	IPR014756	Immunoglobulin E-set	-	NA	NA	K05619	transglutaminase 1 [EC:2.3.2.13]
783	COBS02061	787.807	1.13996	0.382711	3.0587	0.00222299	0.0466779	UP	IPR002931	Transglutaminase-like	-	NA	NA	K05619	transglutaminase 1 [EC:2.3.2.13]
784	COBS02061	787.807	1.13996	0.382711	3.0587	0.00222299	0.0466779	UP	IPR023608	Protein-glutamine gamma-glutamyltransferase, animal	GO:0003810|GO:0018149	NA	NA	K05619	transglutaminase 1 [EC:2.3.2.13]
785	COBS02061	787.807	1.13996	0.382711	3.0587	0.00222299	0.0466779	UP	IPR036985	Transglutaminase-like superfamily	-	NA	NA	K05619	transglutaminase 1 [EC:2.3.2.13]
786	COBS02061	787.807	1.13996	0.382711	3.0587	0.00222299	0.0466779	UP	-	-		PTHR11590,PTHR11590:SF40	PROTEIN-GLUTAMINE GAMMA-GLUTAMYLTRANSFERASE,HEMOCYTE PROTEIN-GLUTAMINE GAMMA-GLUTAMYLTRANSFERASE-LIKE PROTEIN	K05619	transglutaminase 1 [EC:2.3.2.13]
787	COBS02061	787.807	1.13996	0.382711	3.0587	0.00222299	0.0466779	UP	IPR038765	Papain-like cysteine peptidase superfamily	-	NA	NA	K05619	transglutaminase 1 [EC:2.3.2.13]
788	COBS02061	787.807	1.13996	0.382711	3.0587	0.00222299	0.0466779	UP	IPR013808	Transglutaminase, active site	GO:0018149	NA	NA	K05619	transglutaminase 1 [EC:2.3.2.13]
789	COBS02061	787.807	1.13996	0.382711	3.0587	0.00222299	0.0466779	UP	IPR036238	Transglutaminase, C-terminal domain superfamily	GO:0003810|GO:0018149	NA	NA	K05619	transglutaminase 1 [EC:2.3.2.13]
790	COBS02061	787.807	1.13996	0.382711	3.0587	0.00222299	0.0466779	UP	IPR013783	Immunoglobulin-like fold	-	NA	NA	K05619	transglutaminase 1 [EC:2.3.2.13]
791	COBS02061	787.807	1.13996	0.382711	3.0587	0.00222299	0.0466779	UP	IPR001102	Transglutaminase, N-terminal	GO:0018149	NA	NA	K05619	transglutaminase 1 [EC:2.3.2.13]
615	COBS01795	1011.94	1.1362	0.293531	3.68239	0.000231058	0.0102412	UP	IPR016292	Epoxide hydrolase	GO:0016803	NA	NA	K10719	juvenile hormone epoxide hydrolase
617	COBS01795	1011.94	1.1362	0.293531	3.68239	0.000231058	0.0102412	UP	IPR010497	Epoxide hydrolase, N-terminal	-	NA	NA	NA	NA
618	COBS01795	1011.94	1.1362	0.293531	3.68239	0.000231058	0.0102412	UP	IPR010497	Epoxide hydrolase, N-terminal	-	NA	NA	K10719	juvenile hormone epoxide hydrolase
619	COBS01795	1011.94	1.1362	0.293531	3.68239	0.000231058	0.0102412	UP	IPR029058	Alpha/Beta hydrolase fold	-	NA	NA	K10719	juvenile hormone epoxide hydrolase
620	COBS01795	1011.94	1.1362	0.293531	3.68239	0.000231058	0.0102412	UP	-	-		PTHR21661:SF35,PTHR21661	EPOXIDE HYDROLASE,EPOXIDE HYDROLASE 1-RELATED	K10719	juvenile hormone epoxide hydrolase
621	COBS01795	1011.94	1.1362	0.293531	3.68239	0.000231058	0.0102412	UP	IPR029058	Alpha/Beta hydrolase fold	-	NA	NA	NA	NA
623	COBS01795	1011.94	1.1362	0.293531	3.68239	0.000231058	0.0102412	UP	IPR000639	Epoxide hydrolase-like	GO:0003824	NA	NA	K10719	juvenile hormone epoxide hydrolase
627	COBS01795	1011.94	1.1362	0.293531	3.68239	0.000231058	0.0102412	UP	-	-		PTHR21661	EPOXIDE HYDROLASE 1-RELATED	NA	NA
2741	COBS05963	521.142	1.13398	0.296359	3.84	0.000123036	0.00670736	UP	IPR004095	TGS	-	NA	NA	K17420	large subunit ribosomal protein L39
2742	COBS05963	521.142	1.13398	0.296359	3.84	0.000123036	0.00670736	UP	IPR018163	Threonyl/alanyl tRNA synthetase, class II-like, putative editing domain superfamily	GO:0000166	NA	NA	K17420	large subunit ribosomal protein L39
2743	COBS05963	521.142	1.13398	0.296359	3.84	0.000123036	0.00670736	UP	-	-		PTHR42753:SF9,PTHR42753	39S RIBOSOMAL PROTEIN L39, MITOCHONDRIAL,MITOCHONDRIAL RIBOSOME PROTEIN L39/PROLYL-TRNA LIGASE FAMILY MEMBER	K17420	large subunit ribosomal protein L39
2744	COBS05963	521.142	1.13398	0.296359	3.84	0.000123036	0.00670736	UP	IPR012676	TGS-like	-	NA	NA	K17420	large subunit ribosomal protein L39
2745	COBS05963	521.142	1.13398	0.296359	3.84	0.000123036	0.00670736	UP	IPR012675	Beta-grasp domain superfamily	-	NA	NA	K17420	large subunit ribosomal protein L39
3049	COBS06518	656.63	1.13268	0.305602	3.53833	0.000402663	0.0150779	UP	-	-		PTHR24366,PTHR24366:SF128	IG(IMMUNOGLOBULIN) AND LRR(LEUCINE RICH REPEAT) DOMAINS,PROTEIN HALFWAY	NA	NA
3050	COBS06518	656.63	1.13268	0.305602	3.53833	0.000402663	0.0150779	UP	IPR001611	Leucine-rich repeat	GO:0005515	NA	NA	NA	NA
3051	COBS06518	656.63	1.13268	0.305602	3.53833	0.000402663	0.0150779	UP	IPR003591	Leucine-rich repeat, typical subtype	-	NA	NA	NA	NA
3052	COBS06518	656.63	1.13268	0.305602	3.53833	0.000402663	0.0150779	UP	IPR032675	Leucine-rich repeat domain superfamily	-	NA	NA	NA	NA
7755	COBS17977	420.943	1.12967	0.298887	3.32951	0.00086998	0.0256825	UP	IPR029045	ClpP/crotonase-like domain superfamily	-	NA	NA	K05605	3-hydroxyisobutyryl-CoA hydrolase [EC:3.1.2.4]
7756	COBS17977	420.943	1.12967	0.298887	3.32951	0.00086998	0.0256825	UP	IPR032259	Enoyl-CoA hydratase/isomerase, HIBYL-CoA-H type	GO:0003860	PTHR43176	3-HYDROXYISOBUTYRYL-COA HYDROLASE-RELATED	K05605	3-hydroxyisobutyryl-CoA hydrolase [EC:3.1.2.4]
7757	COBS17977	420.943	1.12967	0.298887	3.32951	0.00086998	0.0256825	UP	-	-		PTHR43176:SF3	3-HYDROXYISOBUTYRYL-COA HYDROLASE, MITOCHONDRIAL	K05605	3-hydroxyisobutyryl-CoA hydrolase [EC:3.1.2.4]
7760	COBS17977	420.943	1.12967	0.298887	3.32951	0.00086998	0.0256825	UP	IPR045004	Enoyl-CoA hydratase/isomerase domain	-	NA	NA	K05605	3-hydroxyisobutyryl-CoA hydrolase [EC:3.1.2.4]
1697	COBS04098	641.907	1.12727	0.377036	3.2751	0.00105623	0.029146	UP	-	-		NA	NA	K01307	gamma-glutamyl hydrolase [EC:3.4.19.9]
1698	COBS04098	641.907	1.12727	0.377036	3.2751	0.00105623	0.029146	UP	IPR029062	Class I glutamine amidotransferase-like	-	NA	NA	K01307	gamma-glutamyl hydrolase [EC:3.4.19.9]
1699	COBS04098	641.907	1.12727	0.377036	3.2751	0.00105623	0.029146	UP	IPR011697	Peptidase C26	GO:0016787	NA	NA	K01307	gamma-glutamyl hydrolase [EC:3.4.19.9]
1700	COBS04098	641.907	1.12727	0.377036	3.2751	0.00105623	0.029146	UP	IPR015527	Peptidase C26, gamma-glutamyl hydrolase	GO:0008242	PTHR11315	PROTEASE FAMILY C26 GAMMA-GLUTAMYL HYDROLASE	K01307	gamma-glutamyl hydrolase [EC:3.4.19.9]
6937	COBS15288	515.537	1.12631	0.281059	3.53059	0.000414637	0.0152287	UP	IPR036249	Thioredoxin-like superfamily	-	NA	NA	K00310	pyrimidodiazepine synthase [EC:1.5.4.1]
6938	COBS15288	515.537	1.12631	0.281059	3.53059	0.000414637	0.0152287	UP	IPR036249	Thioredoxin-like superfamily	-	NA	NA	K00799	glutathione S-transferase [EC:2.5.1.18]
6939	COBS15288	515.537	1.12631	0.281059	3.53059	0.000414637	0.0152287	UP	IPR040079	Glutathione transferase family	-	NA	NA	K00310	pyrimidodiazepine synthase [EC:1.5.4.1]
6940	COBS15288	515.537	1.12631	0.281059	3.53059	0.000414637	0.0152287	UP	IPR005442	Glutathione S-transferase, omega-class	GO:0004364|GO:0005737	NA	NA	K00310	pyrimidodiazepine synthase [EC:1.5.4.1]
6941	COBS15288	515.537	1.12631	0.281059	3.53059	0.000414637	0.0152287	UP	IPR004045	Glutathione S-transferase, N-terminal	-	NA	NA	K00799	glutathione S-transferase [EC:2.5.1.18]
6942	COBS15288	515.537	1.12631	0.281059	3.53059	0.000414637	0.0152287	UP	-	-		PTHR43968	-	K00310	pyrimidodiazepine synthase [EC:1.5.4.1]
6943	COBS15288	515.537	1.12631	0.281059	3.53059	0.000414637	0.0152287	UP	IPR036282	Glutathione S-transferase, C-terminal domain superfamily	-	NA	NA	K00310	pyrimidodiazepine synthase [EC:1.5.4.1]
6944	COBS15288	515.537	1.12631	0.281059	3.53059	0.000414637	0.0152287	UP	IPR010987	Glutathione S-transferase, C-terminal-like	-	NA	NA	K00799	glutathione S-transferase [EC:2.5.1.18]
6945	COBS15288	515.537	1.12631	0.281059	3.53059	0.000414637	0.0152287	UP	IPR004045	Glutathione S-transferase, N-terminal	-	NA	NA	K00310	pyrimidodiazepine synthase [EC:1.5.4.1]
6946	COBS15288	515.537	1.12631	0.281059	3.53059	0.000414637	0.0152287	UP	IPR040079	Glutathione transferase family	-	NA	NA	K00799	glutathione S-transferase [EC:2.5.1.18]
6947	COBS15288	515.537	1.12631	0.281059	3.53059	0.000414637	0.0152287	UP	IPR010987	Glutathione S-transferase, C-terminal-like	-	NA	NA	K00310	pyrimidodiazepine synthase [EC:1.5.4.1]
6948	COBS15288	515.537	1.12631	0.281059	3.53059	0.000414637	0.0152287	UP	IPR005442	Glutathione S-transferase, omega-class	GO:0004364|GO:0005737	NA	NA	K00799	glutathione S-transferase [EC:2.5.1.18]
6960	COBS15288	515.537	1.12631	0.281059	3.53059	0.000414637	0.0152287	UP	IPR036282	Glutathione S-transferase, C-terminal domain superfamily	-	NA	NA	K00799	glutathione S-transferase [EC:2.5.1.18]
6970	COBS15288	515.537	1.12631	0.281059	3.53059	0.000414637	0.0152287	UP	-	-		PTHR43968	-	K00799	glutathione S-transferase [EC:2.5.1.18]
6285	COBS14603	974.843	1.12167	0.302301	3.85764	0.000114486	0.00644336	UP	IPR020904	Short-chain dehydrogenase/reductase, conserved site	GO:0016491	NA	NA	K11147	dehydrogenase/reductase SDR family member 4 [EC:1.1.-.-]
6286	COBS14603	974.843	1.12167	0.302301	3.85764	0.000114486	0.00644336	UP	IPR002347	Short-chain dehydrogenase/reductase SDR	-	NA	NA	NA	NA
6287	COBS14603	974.843	1.12167	0.302301	3.85764	0.000114486	0.00644336	UP	-	-		PTHR43943	DEHYDROGENASE/REDUCTASE (SDR FAMILY) MEMBER 4	NA	NA
6288	COBS14603	974.843	1.12167	0.302301	3.85764	0.000114486	0.00644336	UP	IPR036291	NAD(P)-binding domain superfamily	-	NA	NA	K11147	dehydrogenase/reductase SDR family member 4 [EC:1.1.-.-]
6289	COBS14603	974.843	1.12167	0.302301	3.85764	0.000114486	0.00644336	UP	-	-		PTHR43943	DEHYDROGENASE/REDUCTASE (SDR FAMILY) MEMBER 4	K11147	dehydrogenase/reductase SDR family member 4 [EC:1.1.-.-]
6290	COBS14603	974.843	1.12167	0.302301	3.85764	0.000114486	0.00644336	UP	IPR002347	Short-chain dehydrogenase/reductase SDR	-	NA	NA	K11147	dehydrogenase/reductase SDR family member 4 [EC:1.1.-.-]
6292	COBS14603	974.843	1.12167	0.302301	3.85764	0.000114486	0.00644336	UP	IPR036291	NAD(P)-binding domain superfamily	-	NA	NA	NA	NA
6295	COBS14603	974.843	1.12167	0.302301	3.85764	0.000114486	0.00644336	UP	IPR020904	Short-chain dehydrogenase/reductase, conserved site	GO:0016491	NA	NA	NA	NA
4079	COBS08694	511.492	1.12049	0.254096	4.15705	3.22e-05	0.00242501	UP	-	-		PTHR11119:SF91,PTHR11119	-,XANTHINE-URACIL / VITAMIN C PERMEASE FAMILY MEMBER	K14611	solute carrier family 23 (nucleobase transporter), member 1
4080	COBS08694	511.492	1.12049	0.254096	4.15705	3.22e-05	0.00242501	UP	IPR006043	Nucleobase cation symporter 2 family	GO:0016020|GO:0022857|GO:0055085	NA	NA	K14611	solute carrier family 23 (nucleobase transporter), member 1
4082	COBS08694	511.492	1.12049	0.254096	4.15705	3.22e-05	0.00242501	UP	-	-		PTHR11119,PTHR11119:SF91	XANTHINE-URACIL / VITAMIN C PERMEASE FAMILY MEMBER,-	K14611	solute carrier family 23 (nucleobase transporter), member 1
4753	COBS09682	713.3	1.11999	0.345224	3.18366	0.00145425	0.0354411	UP	-	-		PTHR11559:SF405,PTHR11559	ACETYLCHOLINESTERASE-LIKE PROTEIN,CARBOXYLESTERASE	NA	NA
4755	COBS09682	713.3	1.11999	0.345224	3.18366	0.00145425	0.0354411	UP	IPR019819	Carboxylesterase type B, conserved site	-	NA	NA	NA	NA
4756	COBS09682	713.3	1.11999	0.345224	3.18366	0.00145425	0.0354411	UP	IPR029058	Alpha/Beta hydrolase fold	-	NA	NA	NA	NA
4757	COBS09682	713.3	1.11999	0.345224	3.18366	0.00145425	0.0354411	UP	IPR002018	Carboxylesterase, type B	-	NA	NA	K01063	juvenile-hormone esterase [EC:3.1.1.59]
4758	COBS09682	713.3	1.11999	0.345224	3.18366	0.00145425	0.0354411	UP	IPR029058	Alpha/Beta hydrolase fold	-	NA	NA	K01063	juvenile-hormone esterase [EC:3.1.1.59]
4759	COBS09682	713.3	1.11999	0.345224	3.18366	0.00145425	0.0354411	UP	-	-		PTHR11559,PTHR11559:SF405	CARBOXYLESTERASE,ACETYLCHOLINESTERASE-LIKE PROTEIN	NA	NA
4761	COBS09682	713.3	1.11999	0.345224	3.18366	0.00145425	0.0354411	UP	IPR002018	Carboxylesterase, type B	-	NA	NA	NA	NA
4765	COBS09682	713.3	1.11999	0.345224	3.18366	0.00145425	0.0354411	UP	-	-		PTHR43142	CARBOXYLIC ESTER HYDROLASE	K01063	juvenile-hormone esterase [EC:3.1.1.59]
4766	COBS09682	713.3	1.11999	0.345224	3.18366	0.00145425	0.0354411	UP	IPR019819	Carboxylesterase type B, conserved site	-	NA	NA	K01063	juvenile-hormone esterase [EC:3.1.1.59]
4768	COBS09682	713.3	1.11999	0.345224	3.18366	0.00145425	0.0354411	UP	IPR019826	Carboxylesterase type B, active site	-	NA	NA	K01063	juvenile-hormone esterase [EC:3.1.1.59]
4770	COBS09682	713.3	1.11999	0.345224	3.18366	0.00145425	0.0354411	UP	IPR019826	Carboxylesterase type B, active site	-	NA	NA	NA	NA
7505	COBS16757	5900.92	1.11965	0.260092	4.25657	2.08e-05	0.00167419	UP	IPR003116	Raf-like Ras-binding	GO:0007165	NA	NA	NA	NA
7506	COBS16757	5900.92	1.11965	0.260092	4.25657	2.08e-05	0.00167419	UP	IPR039895	Protein cordon-bleu-like	GO:0003785	PTHR21557	CORDON-BLEU	NA	NA
7507	COBS16757	5900.92	1.11965	0.260092	4.25657	2.08e-05	0.00167419	UP	IPR029071	Ubiquitin-like domain superfamily	-	NA	NA	NA	NA
7508	COBS16757	5900.92	1.11965	0.260092	4.25657	2.08e-05	0.00167419	UP	IPR019025	Cordon-bleu, ubiquitin-like domain	-	NA	NA	NA	NA
7511	COBS16757	5900.92	1.11965	0.260092	4.25657	2.08e-05	0.00167419	UP	-	-		NA	NA	NA	NA
5013	COBS10468	14946.3	1.11545	0.52699	3.21818	0.00129008	0.0327673	UP	IPR009003	Peptidase S1, PA clan	-	NA	NA	NA	NA
5014	COBS10468	14946.3	1.11545	0.52699	3.21818	0.00129008	0.0327673	UP	IPR033116	Serine proteases, trypsin family, serine active site	-	NA	NA	NA	NA
5015	COBS10468	14946.3	1.11545	0.52699	3.21818	0.00129008	0.0327673	UP	-	-		PTHR24276:SF78,PTHR24276	AT20289P-RELATED,POLYSERASE-RELATED	NA	NA
5016	COBS10468	14946.3	1.11545	0.52699	3.21818	0.00129008	0.0327673	UP	-	-		PTHR24276,PTHR24276:SF78	POLYSERASE-RELATED,AT20289P-RELATED	NA	NA
5017	COBS10468	14946.3	1.11545	0.52699	3.21818	0.00129008	0.0327673	UP	IPR043504	Peptidase S1, PA clan, chymotrypsin-like fold	-	NA	NA	NA	NA
5018	COBS10468	14946.3	1.11545	0.52699	3.21818	0.00129008	0.0327673	UP	IPR018114	Serine proteases, trypsin family, histidine active site	GO:0004252|GO:0006508	NA	NA	NA	NA
5021	COBS10468	14946.3	1.11545	0.52699	3.21818	0.00129008	0.0327673	UP	IPR001254	Serine proteases, trypsin domain	GO:0004252|GO:0006508	NA	NA	NA	NA
5023	COBS10468	14946.3	1.11545	0.52699	3.21818	0.00129008	0.0327673	UP	IPR001314	Peptidase S1A, chymotrypsin family	GO:0004252|GO:0006508	NA	NA	NA	NA
5030	COBS10567	867.621	1.11305	0.343627	3.19737	0.00138687	0.0341178	UP	-	-		PTHR23222:SF14	PROHIBITIN	K17080	prohibitin 1
5031	COBS10567	867.621	1.11305	0.343627	3.19737	0.00138687	0.0341178	UP	IPR000163	Prohibitin	GO:0016020	PTHR23222	PROHIBITIN	K17080	prohibitin 1
5032	COBS10567	867.621	1.11305	0.343627	3.19737	0.00138687	0.0341178	UP	IPR001107	Band 7 domain	-	NA	NA	K17080	prohibitin 1
5033	COBS10567	867.621	1.11305	0.343627	3.19737	0.00138687	0.0341178	UP	IPR036013	Band 7/SPFH domain superfamily	-	NA	NA	K17080	prohibitin 1
5006	COBS10467	21089.6	1.10857	0.472782	3.27681	0.00104988	0.029022	UP	IPR033116	Serine proteases, trypsin family, serine active site	-	NA	NA	NA	NA
5007	COBS10467	21089.6	1.10857	0.472782	3.27681	0.00104988	0.029022	UP	IPR001314	Peptidase S1A, chymotrypsin family	GO:0004252|GO:0006508	NA	NA	NA	NA
5008	COBS10467	21089.6	1.10857	0.472782	3.27681	0.00104988	0.029022	UP	IPR043504	Peptidase S1, PA clan, chymotrypsin-like fold	-	NA	NA	NA	NA
5009	COBS10467	21089.6	1.10857	0.472782	3.27681	0.00104988	0.029022	UP	IPR001254	Serine proteases, trypsin domain	GO:0004252|GO:0006508	NA	NA	NA	NA
5010	COBS10467	21089.6	1.10857	0.472782	3.27681	0.00104988	0.029022	UP	IPR009003	Peptidase S1, PA clan	-	NA	NA	NA	NA
5011	COBS10467	21089.6	1.10857	0.472782	3.27681	0.00104988	0.029022	UP	-	-		PTHR24276:SF78,PTHR24276	AT20289P-RELATED,POLYSERASE-RELATED	NA	NA
5012	COBS10467	21089.6	1.10857	0.472782	3.27681	0.00104988	0.029022	UP	IPR018114	Serine proteases, trypsin family, histidine active site	GO:0004252|GO:0006508	NA	NA	NA	NA
5939	COBS12642	2259.08	1.10103	0.291061	4.28824	1.8e-05	0.00146759	UP	IPR014710	RmlC-like jelly roll fold	-	NA	NA	NA	NA
5940	COBS12642	2259.08	1.10103	0.291061	4.28824	1.8e-05	0.00146759	UP	IPR011527	ABC transporter type 1, transmembrane domain	GO:0005524|GO:0016021|GO:0055085|GO:0140359	NA	NA	NA	NA
5941	COBS12642	2259.08	1.10103	0.291061	4.28824	1.8e-05	0.00146759	UP	IPR027417	P-loop containing nucleoside triphosphate hydrolase	-	NA	NA	NA	NA
5942	COBS12642	2259.08	1.10103	0.291061	4.28824	1.8e-05	0.00146759	UP	IPR000595	Cyclic nucleotide-binding domain	-	NA	NA	K05033	ATP-binding cassette subfamily C (CFTR/MRP) member 9
5943	COBS12642	2259.08	1.10103	0.291061	4.28824	1.8e-05	0.00146759	UP	IPR003439	ABC transporter-like, ATP-binding domain	GO:0005524	NA	NA	NA	NA
5944	COBS12642	2259.08	1.10103	0.291061	4.28824	1.8e-05	0.00146759	UP	IPR017871	ABC transporter-like, conserved site	GO:0005524	NA	NA	NA	NA
5945	COBS12642	2259.08	1.10103	0.291061	4.28824	1.8e-05	0.00146759	UP	-	-		PTHR24223,PTHR24223:SF346	ATP-BINDING CASSETTE SUB-FAMILY C,ATP-BINDING CASSETTE SUB-FAMILY C MEMBER SUR	NA	NA
5946	COBS12642	2259.08	1.10103	0.291061	4.28824	1.8e-05	0.00146759	UP	-	-		PTHR24223,PTHR24223:SF346	ATP-BINDING CASSETTE SUB-FAMILY C,ATP-BINDING CASSETTE SUB-FAMILY C MEMBER SUR	K05033	ATP-binding cassette subfamily C (CFTR/MRP) member 9
5947	COBS12642	2259.08	1.10103	0.291061	4.28824	1.8e-05	0.00146759	UP	IPR003593	AAA+ ATPase domain	-	NA	NA	K05033	ATP-binding cassette subfamily C (CFTR/MRP) member 9
5948	COBS12642	2259.08	1.10103	0.291061	4.28824	1.8e-05	0.00146759	UP	IPR000595	Cyclic nucleotide-binding domain	-	NA	NA	NA	NA
5949	COBS12642	2259.08	1.10103	0.291061	4.28824	1.8e-05	0.00146759	UP	IPR000961	AGC-kinase, C-terminal	GO:0004674|GO:0005524|GO:0006468	NA	NA	NA	NA
5950	COBS12642	2259.08	1.10103	0.291061	4.28824	1.8e-05	0.00146759	UP	IPR018490	Cyclic nucleotide-binding domain superfamily	-	NA	NA	NA	NA
5951	COBS12642	2259.08	1.10103	0.291061	4.28824	1.8e-05	0.00146759	UP	IPR000719	Protein kinase domain	GO:0004672|GO:0005524|GO:0006468	NA	NA	NA	NA
5952	COBS12642	2259.08	1.10103	0.291061	4.28824	1.8e-05	0.00146759	UP	IPR008271	Serine/threonine-protein kinase, active site	GO:0004672|GO:0006468	NA	NA	NA	NA
5953	COBS12642	2259.08	1.10103	0.291061	4.28824	1.8e-05	0.00146759	UP	IPR036640	ABC transporter type 1, transmembrane domain superfamily	GO:0005524|GO:0016021	NA	NA	K05033	ATP-binding cassette subfamily C (CFTR/MRP) member 9
5954	COBS12642	2259.08	1.10103	0.291061	4.28824	1.8e-05	0.00146759	UP	IPR035014	cGMP-dependent protein kinase, catalytic domain	GO:0004692	NA	NA	K05033	ATP-binding cassette subfamily C (CFTR/MRP) member 9
5956	COBS12642	2259.08	1.10103	0.291061	4.28824	1.8e-05	0.00146759	UP	IPR017441	Protein kinase, ATP binding site	GO:0005524	NA	NA	NA	NA
5957	COBS12642	2259.08	1.10103	0.291061	4.28824	1.8e-05	0.00146759	UP	IPR036640	ABC transporter type 1, transmembrane domain superfamily	GO:0005524|GO:0016021	NA	NA	NA	NA
5958	COBS12642	2259.08	1.10103	0.291061	4.28824	1.8e-05	0.00146759	UP	IPR017871	ABC transporter-like, conserved site	GO:0005524	NA	NA	K05033	ATP-binding cassette subfamily C (CFTR/MRP) member 9
5961	COBS12642	2259.08	1.10103	0.291061	4.28824	1.8e-05	0.00146759	UP	IPR002374	cGMP-dependent kinase	GO:0004692|GO:0005524	NA	NA	K05033	ATP-binding cassette subfamily C (CFTR/MRP) member 9
5962	COBS12642	2259.08	1.10103	0.291061	4.28824	1.8e-05	0.00146759	UP	IPR027417	P-loop containing nucleoside triphosphate hydrolase	-	NA	NA	K05033	ATP-binding cassette subfamily C (CFTR/MRP) member 9
5963	COBS12642	2259.08	1.10103	0.291061	4.28824	1.8e-05	0.00146759	UP	IPR008271	Serine/threonine-protein kinase, active site	GO:0004672|GO:0006468	NA	NA	K05033	ATP-binding cassette subfamily C (CFTR/MRP) member 9
5965	COBS12642	2259.08	1.10103	0.291061	4.28824	1.8e-05	0.00146759	UP	IPR003593	AAA+ ATPase domain	-	NA	NA	NA	NA
5967	COBS12642	2259.08	1.10103	0.291061	4.28824	1.8e-05	0.00146759	UP	IPR035014	cGMP-dependent protein kinase, catalytic domain	GO:0004692	NA	NA	NA	NA
5969	COBS12642	2259.08	1.10103	0.291061	4.28824	1.8e-05	0.00146759	UP	IPR017441	Protein kinase, ATP binding site	GO:0005524	NA	NA	K05033	ATP-binding cassette subfamily C (CFTR/MRP) member 9
5974	COBS12642	2259.08	1.10103	0.291061	4.28824	1.8e-05	0.00146759	UP	IPR002374	cGMP-dependent kinase	GO:0004692|GO:0005524	NA	NA	NA	NA
5976	COBS12642	2259.08	1.10103	0.291061	4.28824	1.8e-05	0.00146759	UP	IPR000719	Protein kinase domain	GO:0004672|GO:0005524|GO:0006468	NA	NA	K05033	ATP-binding cassette subfamily C (CFTR/MRP) member 9
5977	COBS12642	2259.08	1.10103	0.291061	4.28824	1.8e-05	0.00146759	UP	-	-		PTHR24353,PTHR24353:SF58	CYCLIC NUCLEOTIDE-DEPENDENT PROTEIN KINASE,LP05330P	NA	NA
5978	COBS12642	2259.08	1.10103	0.291061	4.28824	1.8e-05	0.00146759	UP	IPR011009	Protein kinase-like domain superfamily	-	NA	NA	NA	NA
5980	COBS12642	2259.08	1.10103	0.291061	4.28824	1.8e-05	0.00146759	UP	IPR000961	AGC-kinase, C-terminal	GO:0004674|GO:0005524|GO:0006468	NA	NA	K05033	ATP-binding cassette subfamily C (CFTR/MRP) member 9
5988	COBS12642	2259.08	1.10103	0.291061	4.28824	1.8e-05	0.00146759	UP	IPR003439	ABC transporter-like, ATP-binding domain	GO:0005524	NA	NA	K05033	ATP-binding cassette subfamily C (CFTR/MRP) member 9
5991	COBS12642	2259.08	1.10103	0.291061	4.28824	1.8e-05	0.00146759	UP	-	-		PTHR24223:SF346,PTHR24223	ATP-BINDING CASSETTE SUB-FAMILY C MEMBER SUR,ATP-BINDING CASSETTE SUB-FAMILY C	NA	NA
5993	COBS12642	2259.08	1.10103	0.291061	4.28824	1.8e-05	0.00146759	UP	IPR018490	Cyclic nucleotide-binding domain superfamily	-	NA	NA	K05033	ATP-binding cassette subfamily C (CFTR/MRP) member 9
5994	COBS12642	2259.08	1.10103	0.291061	4.28824	1.8e-05	0.00146759	UP	IPR011527	ABC transporter type 1, transmembrane domain	GO:0005524|GO:0016021|GO:0055085|GO:0140359	NA	NA	K05033	ATP-binding cassette subfamily C (CFTR/MRP) member 9
5999	COBS12642	2259.08	1.10103	0.291061	4.28824	1.8e-05	0.00146759	UP	IPR011009	Protein kinase-like domain superfamily	-	NA	NA	K05033	ATP-binding cassette subfamily C (CFTR/MRP) member 9
6000	COBS12642	2259.08	1.10103	0.291061	4.28824	1.8e-05	0.00146759	UP	IPR014710	RmlC-like jelly roll fold	-	NA	NA	K05033	ATP-binding cassette subfamily C (CFTR/MRP) member 9
4024	COBS08405	2050.07	1.09806	0.379473	3.24251	0.00118483	0.0310223	UP	IPR004279	Perilipin	-	NA	NA	K17284	perilipin-2
4025	COBS08405	2050.07	1.09806	0.379473	3.24251	0.00118483	0.0310223	UP	-	-		PTHR14024:SF49,PTHR14024	LIPID STORAGE DROPLETS SURFACE-BINDING PROTEIN 1,PERILIPIN	K17284	perilipin-2
4026	COBS08405	2050.07	1.09806	0.379473	3.24251	0.00118483	0.0310223	UP	-	-		PTHR14024:SF49,PTHR14024	LIPID STORAGE DROPLETS SURFACE-BINDING PROTEIN 1,PERILIPIN	NA	NA
7412	COBS16325	615.584	1.09332	0.307707	3.77881	0.000157581	0.00802875	UP	IPR037229	Ribosomal protein L35 superfamily	-	NA	NA	K02916	large subunit ribosomal protein L35
7413	COBS16325	615.584	1.09332	0.307707	3.77881	0.000157581	0.00802875	UP	-	-		PTHR15909:SF0	39S RIBOSOMAL PROTEIN L35, MITOCHONDRIAL	K02916	large subunit ribosomal protein L35
7414	COBS16325	615.584	1.09332	0.307707	3.77881	0.000157581	0.00802875	UP	IPR021137	Ribosomal protein L35	GO:0003735|GO:0005840|GO:0006412	NA	NA	K02916	large subunit ribosomal protein L35
7415	COBS16325	615.584	1.09332	0.307707	3.77881	0.000157581	0.00802875	UP	IPR019338	Ribosomal protein L35, mitochondrial	-	PTHR15909	39S RIBOSOMAL PROTEIN L35, MITOCHONDRIAL	K02916	large subunit ribosomal protein L35
6437	COBS14959	346.038	1.089	0.304841	3.56897	0.000358392	0.0140536	UP	IPR016192	APOBEC/CMP deaminase, zinc-binding	GO:0008270|GO:0016787	NA	NA	K01489	cytidine deaminase [EC:3.5.4.5]
6438	COBS14959	346.038	1.089	0.304841	3.56897	0.000358392	0.0140536	UP	IPR016193	Cytidine deaminase-like	GO:0003824	NA	NA	K01489	cytidine deaminase [EC:3.5.4.5]
6439	COBS14959	346.038	1.089	0.304841	3.56897	0.000358392	0.0140536	UP	IPR002125	Cytidine and deoxycytidylate deaminase domain	-	NA	NA	K01489	cytidine deaminase [EC:3.5.4.5]
6440	COBS14959	346.038	1.089	0.304841	3.56897	0.000358392	0.0140536	UP	IPR006262	Cytidine deaminase, homotetrameric	GO:0004126|GO:0008270|GO:0009972	NA	NA	K01489	cytidine deaminase [EC:3.5.4.5]
6441	COBS14959	346.038	1.089	0.304841	3.56897	0.000358392	0.0140536	UP	-	-		PTHR11644:SF24,PTHR11644	CYTIDINE DEAMINASE,CYTIDINE DEAMINASE	K01489	cytidine deaminase [EC:3.5.4.5]
1078	COBS02933	1293.36	1.086	0.344233	3.40454	0.000662756	0.0210334	UP	IPR033640	Fatty acyl-CoA reductase, C-terminal	-	NA	NA	K13356	alcohol-forming fatty acyl-CoA reductase [EC:1.2.1.84]
1079	COBS02933	1293.36	1.086	0.344233	3.40454	0.000662756	0.0210334	UP	IPR036291	NAD(P)-binding domain superfamily	-	NA	NA	K13356	alcohol-forming fatty acyl-CoA reductase [EC:1.2.1.84]
1080	COBS02933	1293.36	1.086	0.344233	3.40454	0.000662756	0.0210334	UP	IPR013120	Fatty acyl-coenzyme A reductase, NAD-binding domain	-	NA	NA	K13356	alcohol-forming fatty acyl-CoA reductase [EC:1.2.1.84]
1081	COBS02933	1293.36	1.086	0.344233	3.40454	0.000662756	0.0210334	UP	-	-		PTHR11011:SF27	FATTY ACYL-COA REDUCTASE CG8306-RELATED	K13356	alcohol-forming fatty acyl-CoA reductase [EC:1.2.1.84]
1085	COBS02933	1293.36	1.086	0.344233	3.40454	0.000662756	0.0210334	UP	IPR026055	Fatty acyl-CoA reductase	GO:0080019	PTHR11011	MALE STERILITY PROTEIN 2-RELATED	K13356	alcohol-forming fatty acyl-CoA reductase [EC:1.2.1.84]
5783	COBS12242	1835.76	1.08537	0.484565	3.04471	0.00232906	0.0481379	UP	IPR036400	Cytochrome b5-like heme/steroid binding domain superfamily	-	NA	NA	NA	NA
5784	COBS12242	1835.76	1.08537	0.484565	3.04471	0.00232906	0.0481379	UP	IPR005804	Fatty acid desaturase domain	GO:0006629	NA	NA	NA	NA
5786	COBS12242	1835.76	1.08537	0.484565	3.04471	0.00232906	0.0481379	UP	IPR001199	Cytochrome b5-like heme/steroid binding domain	-	NA	NA	NA	NA
5787	COBS12242	1835.76	1.08537	0.484565	3.04471	0.00232906	0.0481379	UP	-	-		PTHR16740	CYTOCHROME B5-RELATED PROTEIN-RELATED	NA	NA
2810	COBS06098	15394.4	1.0823	0.2874	3.69714	0.000218041	0.0098468	UP	IPR034737	Translationally controlled tumour protein (TCTP) domain	-	NA	NA	NA	NA
2812	COBS06098	15394.4	1.0823	0.2874	3.69714	0.000218041	0.0098468	UP	IPR018105	Translationally controlled tumour protein	-	PTHR11991	TRANSLATIONALLY CONTROLLED TUMOR PROTEIN-RELATED	NA	NA
2813	COBS06098	15394.4	1.0823	0.2874	3.69714	0.000218041	0.0098468	UP	IPR011323	Mss4/translationally controlled tumour-associated TCTP	-	NA	NA	NA	NA
2815	COBS06098	15394.4	1.0823	0.2874	3.69714	0.000218041	0.0098468	UP	IPR018103	Translationally controlled tumour protein, conserved site	-	NA	NA	NA	NA
2818	COBS06098	15394.4	1.0823	0.2874	3.69714	0.000218041	0.0098468	UP	IPR011057	Mss4-like superfamily	-	NA	NA	NA	NA
1906	COBS04526	1064.02	1.0787	0.330802	3.77544	0.000159726	0.00808763	UP	IPR001611	Leucine-rich repeat	GO:0005515	NA	NA	K10348	LRR-repeat protein 1
1907	COBS04526	1064.02	1.0787	0.330802	3.77544	0.000159726	0.00808763	UP	IPR003591	Leucine-rich repeat, typical subtype	-	NA	NA	K10348	LRR-repeat protein 1
1908	COBS04526	1064.02	1.0787	0.330802	3.77544	0.000159726	0.00808763	UP	-	-		PTHR45752,PTHR45752:SF13	LEUCINE-RICH REPEAT-CONTAINING,LEUCINE-RICH REPEAT-CONTAINING PROTEIN 58	K10348	LRR-repeat protein 1
1909	COBS04526	1064.02	1.0787	0.330802	3.77544	0.000159726	0.00808763	UP	IPR032675	Leucine-rich repeat domain superfamily	-	NA	NA	K10348	LRR-repeat protein 1
7776	COBS18085	785.118	1.07207	0.202135	5.07009	3.98e-07	6.28e-05	UP	IPR007484	Peptidase M28	-	NA	NA	K00683	glutaminyl-peptide cyclotransferase [EC:2.3.2.5]
7777	COBS18085	785.118	1.07207	0.202135	5.07009	3.98e-07	6.28e-05	UP	-	-		NA	NA	K00683	glutaminyl-peptide cyclotransferase [EC:2.3.2.5]
7778	COBS18085	785.118	1.07207	0.202135	5.07009	3.98e-07	6.28e-05	UP	IPR040234	Glutaminyl-peptide cyclotransferase-like	-	PTHR12283	GLUTAMINYL-PEPTIDE CYCLOTRANSFERASE	K00683	glutaminyl-peptide cyclotransferase [EC:2.3.2.5]
7788	COBS18085	785.118	1.07207	0.202135	5.07009	3.98e-07	6.28e-05	UP	IPR037457	M28 Zn-Peptidase Glutaminyl Cyclase	GO:0016603	NA	NA	K00683	glutaminyl-peptide cyclotransferase [EC:2.3.2.5]
7883	COBS18600	722.129	1.07072	0.296661	3.7538	0.000174176	0.00860585	UP	-	-		PTHR17616,PTHR17616:SF10	YES-ASSOCIATED PROTEIN YAP1 FAMILY MEMBER,-	K19329	WW domain-containing oxidoreductase
7884	COBS18600	722.129	1.07072	0.296661	3.7538	0.000174176	0.00860585	UP	IPR001202	WW domain	GO:0005515	NA	NA	K19329	WW domain-containing oxidoreductase
7885	COBS18600	722.129	1.07072	0.296661	3.7538	0.000174176	0.00860585	UP	IPR002347	Short-chain dehydrogenase/reductase SDR	-	NA	NA	K19329	WW domain-containing oxidoreductase
7886	COBS18600	722.129	1.07072	0.296661	3.7538	0.000174176	0.00860585	UP	IPR036291	NAD(P)-binding domain superfamily	-	NA	NA	K19329	WW domain-containing oxidoreductase
7887	COBS18600	722.129	1.07072	0.296661	3.7538	0.000174176	0.00860585	UP	IPR036020	WW domain superfamily	GO:0005515	NA	NA	K19329	WW domain-containing oxidoreductase
2756	COBS06045	598.966	1.06681	0.477841	3.51065	0.000447013	0.0160633	UP	-	-		PTHR24241:SF174,PTHR24241	CARDIOACCELERATORY PEPTIDE RECEPTOR-LIKE PROTEIN,NEUROPEPTIDE RECEPTOR-RELATED G-PROTEIN COUPLED RECEPTOR	K04280	gonadotropin-releasing hormone receptor
2757	COBS06045	598.966	1.06681	0.477841	3.51065	0.000447013	0.0160633	UP	IPR017452	GPCR, rhodopsin-like, 7TM	GO:0016021	NA	NA	K04280	gonadotropin-releasing hormone receptor
2759	COBS06045	598.966	1.06681	0.477841	3.51065	0.000447013	0.0160633	UP	IPR000276	G protein-coupled receptor, rhodopsin-like	GO:0004930|GO:0007186|GO:0016021	NA	NA	K04280	gonadotropin-releasing hormone receptor
2761	COBS06045	598.966	1.06681	0.477841	3.51065	0.000447013	0.0160633	UP	-	-		PTHR24241,PTHR24241:SF174	NEUROPEPTIDE RECEPTOR-RELATED G-PROTEIN COUPLED RECEPTOR,CARDIOACCELERATORY PEPTIDE RECEPTOR-LIKE PROTEIN	K04280	gonadotropin-releasing hormone receptor
5719	COBS11724	395.107	1.06282	0.300641	3.21227	0.0013169	0.0331792	UP	-	-		PTHR12841:SF6	PROTEIN UNC-50 HOMOLOG	NA	NA
5720	COBS11724	395.107	1.06282	0.300641	3.21227	0.0013169	0.0331792	UP	IPR007881	UNC-50	-	PTHR12841	PROTEIN UNC-50 HOMOLOG	NA	NA
1785	COBS04335	5.15008	1.06046	1.18351	12.1543	5.45e-34	6.55e-31	UP	-	-		PTHR33332:SF23,PTHR33332	-,-	NA	NA
1786	COBS04335	5.15008	1.06046	1.18351	12.1543	5.45e-34	6.55e-31	UP	IPR000477	Reverse transcriptase domain	-	NA	NA	NA	NA
2861	COBS06314	1936.71	1.05605	0.29701	3.44926	0.000562119	0.0186679	UP	IPR018206	Electron transfer flavoprotein subunit alpha, conserved site	-	NA	NA	K03522	electron transfer flavoprotein alpha subunit
2862	COBS06314	1936.71	1.05605	0.29701	3.44926	0.000562119	0.0186679	UP	IPR014731	Electron transfer flavoprotein, alpha subunit, C-terminal	-	NA	NA	K03522	electron transfer flavoprotein alpha subunit
2863	COBS06314	1936.71	1.05605	0.29701	3.44926	0.000562119	0.0186679	UP	IPR014730	Electron transfer flavoprotein, alpha/beta-subunit, N-terminal	-	NA	NA	K03522	electron transfer flavoprotein alpha subunit
2864	COBS06314	1936.71	1.05605	0.29701	3.44926	0.000562119	0.0186679	UP	IPR014729	Rossmann-like alpha/beta/alpha sandwich fold	-	NA	NA	K03522	electron transfer flavoprotein alpha subunit
2865	COBS06314	1936.71	1.05605	0.29701	3.44926	0.000562119	0.0186679	UP	IPR033947	Electron transfer flavoprotein, alpha subunit, N-terminal	-	NA	NA	K03522	electron transfer flavoprotein alpha subunit
2866	COBS06314	1936.71	1.05605	0.29701	3.44926	0.000562119	0.0186679	UP	IPR001308	Electron transfer flavoprotein alpha subunit/FixB	GO:0009055|GO:0050660	PTHR43153	ELECTRON TRANSFER FLAVOPROTEIN ALPHA	K03522	electron transfer flavoprotein alpha subunit
2867	COBS06314	1936.71	1.05605	0.29701	3.44926	0.000562119	0.0186679	UP	IPR029035	DHS-like NAD/FAD-binding domain superfamily	-	NA	NA	K03522	electron transfer flavoprotein alpha subunit
2868	COBS06314	1936.71	1.05605	0.29701	3.44926	0.000562119	0.0186679	UP	-	-		PTHR43153:SF1	ELECTRON TRANSFER FLAVOPROTEIN SUBUNIT ALPHA, MITOCHONDRIAL	K03522	electron transfer flavoprotein alpha subunit
554	COBS01412	1709.44	1.05427	0.285458	3.80087	0.00014419	0.00754513	UP	IPR036259	MFS transporter superfamily	-	NA	NA	K08187	MFS transporter, MCT family, solute carrier family 16 (monocarboxylic acid transporters), member 10
555	COBS01412	1709.44	1.05427	0.285458	3.80087	0.00014419	0.00754513	UP	IPR030762	Monocarboxylate transporter 10	GO:0005887|GO:0015173|GO:0015349|GO:0055085	PTHR11360:SF119	MONOCARBOXYLATE TRANSPORTER 10	K08187	MFS transporter, MCT family, solute carrier family 16 (monocarboxylic acid transporters), member 10
556	COBS01412	1709.44	1.05427	0.285458	3.80087	0.00014419	0.00754513	UP	-	-		PTHR11360	MONOCARBOXYLATE TRANSPORTER	K08187	MFS transporter, MCT family, solute carrier family 16 (monocarboxylic acid transporters), member 10
557	COBS01412	1709.44	1.05427	0.285458	3.80087	0.00014419	0.00754513	UP	IPR020846	Major facilitator superfamily domain	GO:0022857	NA	NA	K08187	MFS transporter, MCT family, solute carrier family 16 (monocarboxylic acid transporters), member 10
558	COBS01412	1709.44	1.05427	0.285458	3.80087	0.00014419	0.00754513	UP	IPR011701	Major facilitator superfamily	GO:0022857|GO:0055085	NA	NA	K08187	MFS transporter, MCT family, solute carrier family 16 (monocarboxylic acid transporters), member 10
4191	COBS08948	3038.76	1.05413	0.197893	5.61946	1.92e-08	4e-06	UP	IPR017896	4Fe-4S ferredoxin-type, iron-sulphur binding domain	-	NA	NA	K00207	dihydropyrimidine dehydrogenase (NADP+) [EC:1.3.1.2]
4192	COBS08948	3038.76	1.05413	0.197893	5.61946	1.92e-08	4e-06	UP	IPR017900	4Fe-4S ferredoxin, iron-sulphur binding, conserved site	-	NA	NA	K00207	dihydropyrimidine dehydrogenase (NADP+) [EC:1.3.1.2]
4193	COBS08948	3038.76	1.05413	0.197893	5.61946	1.92e-08	4e-06	UP	IPR001295	Dihydroorotate dehydrogenase, conserved site	GO:0006207|GO:0016627	NA	NA	K00207	dihydropyrimidine dehydrogenase (NADP+) [EC:1.3.1.2]
4194	COBS08948	3038.76	1.05413	0.197893	5.61946	1.92e-08	4e-06	UP	IPR013785	Aldolase-type TIM barrel	-	NA	NA	K00207	dihydropyrimidine dehydrogenase (NADP+) [EC:1.3.1.2]
4195	COBS08948	3038.76	1.05413	0.197893	5.61946	1.92e-08	4e-06	UP	IPR036188	FAD/NAD(P)-binding domain superfamily	-	NA	NA	K00207	dihydropyrimidine dehydrogenase (NADP+) [EC:1.3.1.2]
4196	COBS08948	3038.76	1.05413	0.197893	5.61946	1.92e-08	4e-06	UP	IPR005720	Dihydroorotate dehydrogenase domain	GO:0005737|GO:0016627	NA	NA	K00207	dihydropyrimidine dehydrogenase (NADP+) [EC:1.3.1.2]
4197	COBS08948	3038.76	1.05413	0.197893	5.61946	1.92e-08	4e-06	UP	-	-		PTHR43073:SF2	DIHYDROPYRIMIDINE DEHYDROGENASE [NADP(+)]	K00207	dihydropyrimidine dehydrogenase (NADP+) [EC:1.3.1.2]
4198	COBS08948	3038.76	1.05413	0.197893	5.61946	1.92e-08	4e-06	UP	IPR023753	FAD/NAD(P)-binding domain	GO:0016491	NA	NA	K00207	dihydropyrimidine dehydrogenase (NADP+) [EC:1.3.1.2]
4201	COBS08948	3038.76	1.05413	0.197893	5.61946	1.92e-08	4e-06	UP	IPR044512	Dihydropyrimidine dehydrogenase	GO:0006210|GO:0006212	PTHR43073	DIHYDROPYRIMIDINE DEHYDROGENASE [NADP(+)]	K00207	dihydropyrimidine dehydrogenase (NADP+) [EC:1.3.1.2]
4203	COBS08948	3038.76	1.05413	0.197893	5.61946	1.92e-08	4e-06	UP	IPR028261	Dihydroprymidine dehydrogenase domain II	-	NA	NA	K00207	dihydropyrimidine dehydrogenase (NADP+) [EC:1.3.1.2]
4204	COBS08948	3038.76	1.05413	0.197893	5.61946	1.92e-08	4e-06	UP	IPR009051	Alpha-helical ferredoxin	GO:0051536	NA	NA	K00207	dihydropyrimidine dehydrogenase (NADP+) [EC:1.3.1.2]
7279	COBS15684	3235.09	1.05401	0.324336	3.52939	0.000416512	0.0152617	UP	-	-		PTHR43134:SF1,PTHR43134	SIGNAL RECOGNITION PARTICLE RECEPTOR SUBUNIT ALPHA,SIGNAL RECOGNITION PARTICLE RECEPTOR SUBUNIT ALPHA	K13431	signal recognition particle receptor subunit alpha
7280	COBS15684	3235.09	1.05401	0.324336	3.52939	0.000416512	0.0152617	UP	IPR003593	AAA+ ATPase domain	-	NA	NA	K13431	signal recognition particle receptor subunit alpha
7281	COBS15684	3235.09	1.05401	0.324336	3.52939	0.000416512	0.0152617	UP	IPR042101	Signal recognition particle SRP54, N-terminal domain superfamily	-	NA	NA	K13431	signal recognition particle receptor subunit alpha
7282	COBS15684	3235.09	1.05401	0.324336	3.52939	0.000416512	0.0152617	UP	IPR000897	Signal recognition particle, SRP54 subunit, GTPase domain	GO:0005525|GO:0006614	NA	NA	K13431	signal recognition particle receptor subunit alpha
7283	COBS15684	3235.09	1.05401	0.324336	3.52939	0.000416512	0.0152617	UP	IPR036225	SRP/SRP receptor, N-terminal	-	NA	NA	K13431	signal recognition particle receptor subunit alpha
7284	COBS15684	3235.09	1.05401	0.324336	3.52939	0.000416512	0.0152617	UP	IPR027417	P-loop containing nucleoside triphosphate hydrolase	-	NA	NA	K13431	signal recognition particle receptor subunit alpha
7285	COBS15684	3235.09	1.05401	0.324336	3.52939	0.000416512	0.0152617	UP	IPR011012	Longin-like domain superfamily	-	NA	NA	K13431	signal recognition particle receptor subunit alpha
7286	COBS15684	3235.09	1.05401	0.324336	3.52939	0.000416512	0.0152617	UP	IPR007222	Signal recognition particle receptor, alpha subunit, N-terminal	GO:0003924|GO:0005047|GO:0005525|GO:0005785|GO:0006886	NA	NA	K13431	signal recognition particle receptor subunit alpha
7290	COBS15684	3235.09	1.05401	0.324336	3.52939	0.000416512	0.0152617	UP	IPR013822	Signal recognition particle SRP54, helical bundle	GO:0005525|GO:0006614	NA	NA	K13431	signal recognition particle receptor subunit alpha
7294	COBS15684	3235.09	1.05401	0.324336	3.52939	0.000416512	0.0152617	UP	-	-		PTHR43134,PTHR43134:SF1	SIGNAL RECOGNITION PARTICLE RECEPTOR SUBUNIT ALPHA,SIGNAL RECOGNITION PARTICLE RECEPTOR SUBUNIT ALPHA	K13431	signal recognition particle receptor subunit alpha
4229	COBS09093	3025.1	1.05183	0.325678	3.53215	0.000412197	0.0151747	UP	IPR035987	Ribosomal protein S8 superfamily	GO:0003735|GO:0005840|GO:0006412	NA	NA	K02957	small subunit ribosomal protein S15Ae
4230	COBS09093	3025.1	1.05183	0.325678	3.53215	0.000412197	0.0151747	UP	IPR000630	Ribosomal protein S8	GO:0003735|GO:0005840|GO:0006412	PTHR11758	40S RIBOSOMAL PROTEIN S15A	K02957	small subunit ribosomal protein S15Ae
4231	COBS09093	3025.1	1.05183	0.325678	3.53215	0.000412197	0.0151747	UP	-	-		PTHR11758:SF34	-	K02957	small subunit ribosomal protein S15Ae
4059	COBS08561	719.07	1.04541	0.283933	3.41205	0.000644772	0.0206723	UP	IPR029052	Metallo-dependent phosphatase-like	-	NA	NA	NA	NA
4060	COBS08561	719.07	1.04541	0.283933	3.41205	0.000644772	0.0206723	UP	IPR041871	TMEM62, metallophosphatase domain	-	NA	NA	NA	NA
4061	COBS08561	719.07	1.04541	0.283933	3.41205	0.000644772	0.0206723	UP	IPR004843	Calcineurin-like phosphoesterase domain, ApaH type	GO:0016787	NA	NA	NA	NA
4062	COBS08561	719.07	1.04541	0.283933	3.41205	0.000644772	0.0206723	UP	-	-		PTHR14795,PTHR14795:SF0	HELICASE RELATED,TRANSMEMBRANE PROTEIN 62	NA	NA
2709	COBS05903	1833.59	1.04432	0.35723	3.12115	0.00180143	0.0411182	UP	IPR000152	EGF-type aspartate/asparagine hydroxylation site	-	NA	NA	K14616	cubilin
2710	COBS05903	1833.59	1.04432	0.35723	3.12115	0.00180143	0.0411182	UP	IPR000859	CUB domain	-	NA	NA	K14616	cubilin
2711	COBS05903	1833.59	1.04432	0.35723	3.12115	0.00180143	0.0411182	UP	IPR018097	EGF-like calcium-binding, conserved site	GO:0005509	NA	NA	K14616	cubilin
2712	COBS05903	1833.59	1.04432	0.35723	3.12115	0.00180143	0.0411182	UP	IPR013032	EGF-like, conserved site	-	NA	NA	K14616	cubilin
2713	COBS05903	1833.59	1.04432	0.35723	3.12115	0.00180143	0.0411182	UP	-	-		PTHR46908	CUBILIN-LIKE PROTEIN	K14616	cubilin
2714	COBS05903	1833.59	1.04432	0.35723	3.12115	0.00180143	0.0411182	UP	IPR035914	Spermadhesin, CUB domain superfamily	-	NA	NA	K14616	cubilin
2715	COBS05903	1833.59	1.04432	0.35723	3.12115	0.00180143	0.0411182	UP	IPR001881	EGF-like calcium-binding domain	GO:0005509	NA	NA	K14616	cubilin
2716	COBS05903	1833.59	1.04432	0.35723	3.12115	0.00180143	0.0411182	UP	IPR000742	EGF-like domain	-	NA	NA	K14616	cubilin
1616	COBS03665	541.621	1.04291	0.356327	3.6225	0.000291766	0.0121733	UP	IPR020846	Major facilitator superfamily domain	GO:0022857	NA	NA	NA	NA
1617	COBS03665	541.621	1.04291	0.356327	3.6225	0.000291766	0.0121733	UP	IPR036259	MFS transporter superfamily	-	NA	NA	NA	NA
1618	COBS03665	541.621	1.04291	0.356327	3.6225	0.000291766	0.0121733	UP	-	-		PTHR24064:SF316,PTHR24064	ORGANIC CATION TRANSPORTER PROTEIN-LIKE PROTEIN,SOLUTE CARRIER FAMILY 22 MEMBER	NA	NA
1619	COBS03665	541.621	1.04291	0.356327	3.6225	0.000291766	0.0121733	UP	IPR005828	Major facilitator, sugar transporter-like	GO:0016021|GO:0022857|GO:0055085	NA	NA	NA	NA
1226	COBS03331	6251.84	1.04094	0.222291	4.78178	1.74e-06	0.000232347	UP	-	-		PTHR13691:SF16	60S RIBOSOMAL PROTEIN L8	K02938	large subunit ribosomal protein L8e
1227	COBS03331	6251.84	1.04094	0.222291	4.78178	1.74e-06	0.000232347	UP	IPR012340	Nucleic acid-binding, OB-fold	-	NA	NA	K02938	large subunit ribosomal protein L8e
1228	COBS03331	6251.84	1.04094	0.222291	4.78178	1.74e-06	0.000232347	UP	IPR008991	Translation protein SH3-like domain superfamily	-	NA	NA	K02938	large subunit ribosomal protein L8e
1229	COBS03331	6251.84	1.04094	0.222291	4.78178	1.74e-06	0.000232347	UP	IPR002171	Ribosomal protein L2	GO:0003735|GO:0005840|GO:0006412	PTHR13691	RIBOSOMAL PROTEIN L2	K02938	large subunit ribosomal protein L8e
1230	COBS03331	6251.84	1.04094	0.222291	4.78178	1.74e-06	0.000232347	UP	IPR022666	Ribosomal Proteins L2, RNA binding domain	GO:0003735|GO:0005840|GO:0006412	NA	NA	K02938	large subunit ribosomal protein L8e
1231	COBS03331	6251.84	1.04094	0.222291	4.78178	1.74e-06	0.000232347	UP	IPR014722	Ribosomal protein L2, domain 2	-	NA	NA	K02938	large subunit ribosomal protein L8e
1232	COBS03331	6251.84	1.04094	0.222291	4.78178	1.74e-06	0.000232347	UP	IPR022669	Ribosomal protein L2, C-terminal	GO:0003735|GO:0005840|GO:0006412	NA	NA	K02938	large subunit ribosomal protein L8e
1233	COBS03331	6251.84	1.04094	0.222291	4.78178	1.74e-06	0.000232347	UP	IPR014726	Ribosomal protein L2, domain 3	-	NA	NA	K02938	large subunit ribosomal protein L8e
1234	COBS03331	6251.84	1.04094	0.222291	4.78178	1.74e-06	0.000232347	UP	IPR022671	Ribosomal protein L2, conserved site	GO:0003735|GO:0005840|GO:0006412	NA	NA	K02938	large subunit ribosomal protein L8e
5325	COBS10785	3488.27	1.03853	0.341656	3.08756	0.00201808	0.0440374	UP	IPR027417	P-loop containing nucleoside triphosphate hydrolase	-	NA	NA	K10358	myosin VI
5326	COBS10785	3488.27	1.03853	0.341656	3.08756	0.00201808	0.0440374	UP	IPR036961	Kinesin motor domain superfamily	-	NA	NA	K10358	myosin VI
5327	COBS10785	3488.27	1.03853	0.341656	3.08756	0.00201808	0.0440374	UP	IPR008989	Myosin S1 fragment, N-terminal	GO:0003774|GO:0005524|GO:0051015	NA	NA	K10358	myosin VI
5328	COBS10785	3488.27	1.03853	0.341656	3.08756	0.00201808	0.0440374	UP	IPR001609	Myosin head, motor domain	GO:0003774|GO:0005524|GO:0016459	NA	NA	K10358	myosin VI
5329	COBS10785	3488.27	1.03853	0.341656	3.08756	0.00201808	0.0440374	UP	IPR000048	IQ motif, EF-hand binding site	GO:0005515	NA	NA	K10358	myosin VI
5330	COBS10785	3488.27	1.03853	0.341656	3.08756	0.00201808	0.0440374	UP	-	-		PTHR13140:SF794,PTHR13140	MYOSIN VIA,MYOSIN	K10358	myosin VI
5331	COBS10785	3488.27	1.03853	0.341656	3.08756	0.00201808	0.0440374	UP	IPR036114	Class VI myosin, motor domain	-	NA	NA	K10358	myosin VI
5332	COBS10785	3488.27	1.03853	0.341656	3.08756	0.00201808	0.0440374	UP	IPR032412	Myosin VI, cargo binding domain	-	NA	NA	K10358	myosin VI
5338	COBS10785	3488.27	1.03853	0.341656	3.08756	0.00201808	0.0440374	UP	IPR004009	Myosin, N-terminal, SH3-like	GO:0003774|GO:0005524|GO:0016459	NA	NA	K10358	myosin VI
4332	COBS09362	18622.2	1.03806	0.237667	4.57979	4.65e-06	0.000526495	UP	-	-		PTHR45617:SF69,PTHR45617	SI:DKEY-1J5.4,-	K17256	insulin-like growth factor-binding protein complex acid labile subunit
4333	COBS09362	18622.2	1.03806	0.237667	4.57979	4.65e-06	0.000526495	UP	IPR003591	Leucine-rich repeat, typical subtype	-	NA	NA	K17256	insulin-like growth factor-binding protein complex acid labile subunit
4334	COBS09362	18622.2	1.03806	0.237667	4.57979	4.65e-06	0.000526495	UP	IPR026906	BspA type Leucine rich repeat region	-	NA	NA	K17256	insulin-like growth factor-binding protein complex acid labile subunit
4335	COBS09362	18622.2	1.03806	0.237667	4.57979	4.65e-06	0.000526495	UP	IPR001611	Leucine-rich repeat	GO:0005515	NA	NA	K17256	insulin-like growth factor-binding protein complex acid labile subunit
4336	COBS09362	18622.2	1.03806	0.237667	4.57979	4.65e-06	0.000526495	UP	IPR032675	Leucine-rich repeat domain superfamily	-	NA	NA	K17256	insulin-like growth factor-binding protein complex acid labile subunit
3650	COBS07877	176.98	1.03704	0.208112	4.43073	9.39e-06	0.000924131	UP	IPR018108	Mitochondrial substrate/solute carrier	-	NA	NA	K15111	solute carrier family 25 (mitochondrial S-adenosylmethionine transporter), member 26
3651	COBS07877	176.98	1.03704	0.208112	4.43073	9.39e-06	0.000924131	UP	IPR023395	Mitochondrial carrier domain superfamily	-	NA	NA	K15111	solute carrier family 25 (mitochondrial S-adenosylmethionine transporter), member 26
3652	COBS07877	176.98	1.03704	0.208112	4.43073	9.39e-06	0.000924131	UP	-	-		PTHR45667:SF9,PTHR45667	S-ADENOSYLMETHIONINE MITOCHONDRIAL CARRIER PROTEIN,S-ADENOSYLMETHIONINE MITOCHONDRIAL CARRIER PROTEIN	K15111	solute carrier family 25 (mitochondrial S-adenosylmethionine transporter), member 26
3653	COBS07877	176.98	1.03704	0.208112	4.43073	9.39e-06	0.000924131	UP	-	-		PTHR45667,PTHR45667:SF9	S-ADENOSYLMETHIONINE MITOCHONDRIAL CARRIER PROTEIN,S-ADENOSYLMETHIONINE MITOCHONDRIAL CARRIER PROTEIN	K15111	solute carrier family 25 (mitochondrial S-adenosylmethionine transporter), member 26
8324	COBS19678	619.475	1.03664	0.290535	3.50845	0.000450718	0.0160713	UP	IPR013328	6-phosphogluconate dehydrogenase, domain 2	GO:0016491	NA	NA	K23146	3-hydroxyisobutyrate/3-hydroxypropionate dehydrogenase [EC:1.1.1.31 1.1.1.59]
8325	COBS19678	619.475	1.03664	0.290535	3.50845	0.000450718	0.0160713	UP	IPR011548	3-hydroxyisobutyrate dehydrogenase	GO:0008442|GO:0051287	NA	NA	K00020	3-hydroxyisobutyrate dehydrogenase [EC:1.1.1.31]
8326	COBS19678	619.475	1.03664	0.290535	3.50845	0.000450718	0.0160713	UP	-	-		PTHR22981	3-HYDROXYISOBUTYRATE DEHYDROGENASE-RELATED	K00020	3-hydroxyisobutyrate dehydrogenase [EC:1.1.1.31]
8327	COBS19678	619.475	1.03664	0.290535	3.50845	0.000450718	0.0160713	UP	IPR015815	3-hydroxyisobutyrate dehydrogenase-related	GO:0016491	NA	NA	K00020	3-hydroxyisobutyrate dehydrogenase [EC:1.1.1.31]
8329	COBS19678	619.475	1.03664	0.290535	3.50845	0.000450718	0.0160713	UP	IPR008927	6-phosphogluconate dehydrogenase-like, C-terminal domain superfamily	-	NA	NA	K00020	3-hydroxyisobutyrate dehydrogenase [EC:1.1.1.31]
8330	COBS19678	619.475	1.03664	0.290535	3.50845	0.000450718	0.0160713	UP	IPR036291	NAD(P)-binding domain superfamily	-	NA	NA	K00020	3-hydroxyisobutyrate dehydrogenase [EC:1.1.1.31]
8331	COBS19678	619.475	1.03664	0.290535	3.50845	0.000450718	0.0160713	UP	IPR008927	6-phosphogluconate dehydrogenase-like, C-terminal domain superfamily	-	NA	NA	K23146	3-hydroxyisobutyrate/3-hydroxypropionate dehydrogenase [EC:1.1.1.31 1.1.1.59]
8333	COBS19678	619.475	1.03664	0.290535	3.50845	0.000450718	0.0160713	UP	IPR013328	6-phosphogluconate dehydrogenase, domain 2	GO:0016491	NA	NA	K00020	3-hydroxyisobutyrate dehydrogenase [EC:1.1.1.31]
8334	COBS19678	619.475	1.03664	0.290535	3.50845	0.000450718	0.0160713	UP	-	-		PTHR22981	3-HYDROXYISOBUTYRATE DEHYDROGENASE-RELATED	K23146	3-hydroxyisobutyrate/3-hydroxypropionate dehydrogenase [EC:1.1.1.31 1.1.1.59]
8335	COBS19678	619.475	1.03664	0.290535	3.50845	0.000450718	0.0160713	UP	IPR029154	3-hydroxyisobutyrate dehydrogenase-like, NAD-binding domain	GO:0051287	NA	NA	K00020	3-hydroxyisobutyrate dehydrogenase [EC:1.1.1.31]
8336	COBS19678	619.475	1.03664	0.290535	3.50845	0.000450718	0.0160713	UP	IPR006115	6-phosphogluconate dehydrogenase, NADP-binding	GO:0050661	NA	NA	K00020	3-hydroxyisobutyrate dehydrogenase [EC:1.1.1.31]
8340	COBS19678	619.475	1.03664	0.290535	3.50845	0.000450718	0.0160713	UP	IPR036291	NAD(P)-binding domain superfamily	-	NA	NA	K23146	3-hydroxyisobutyrate/3-hydroxypropionate dehydrogenase [EC:1.1.1.31 1.1.1.59]
8341	COBS19678	619.475	1.03664	0.290535	3.50845	0.000450718	0.0160713	UP	IPR029154	3-hydroxyisobutyrate dehydrogenase-like, NAD-binding domain	GO:0051287	NA	NA	K23146	3-hydroxyisobutyrate/3-hydroxypropionate dehydrogenase [EC:1.1.1.31 1.1.1.59]
8343	COBS19678	619.475	1.03664	0.290535	3.50845	0.000450718	0.0160713	UP	IPR011548	3-hydroxyisobutyrate dehydrogenase	GO:0008442|GO:0051287	NA	NA	K23146	3-hydroxyisobutyrate/3-hydroxypropionate dehydrogenase [EC:1.1.1.31 1.1.1.59]
8344	COBS19678	619.475	1.03664	0.290535	3.50845	0.000450718	0.0160713	UP	IPR002204	3-hydroxyisobutyrate dehydrogenase-related, conserved site	GO:0016491	NA	NA	K23146	3-hydroxyisobutyrate/3-hydroxypropionate dehydrogenase [EC:1.1.1.31 1.1.1.59]
8346	COBS19678	619.475	1.03664	0.290535	3.50845	0.000450718	0.0160713	UP	IPR006115	6-phosphogluconate dehydrogenase, NADP-binding	GO:0050661	NA	NA	K23146	3-hydroxyisobutyrate/3-hydroxypropionate dehydrogenase [EC:1.1.1.31 1.1.1.59]
8348	COBS19678	619.475	1.03664	0.290535	3.50845	0.000450718	0.0160713	UP	IPR015815	3-hydroxyisobutyrate dehydrogenase-related	GO:0016491	NA	NA	K23146	3-hydroxyisobutyrate/3-hydroxypropionate dehydrogenase [EC:1.1.1.31 1.1.1.59]
8349	COBS19678	619.475	1.03664	0.290535	3.50845	0.000450718	0.0160713	UP	IPR002204	3-hydroxyisobutyrate dehydrogenase-related, conserved site	GO:0016491	NA	NA	K00020	3-hydroxyisobutyrate dehydrogenase [EC:1.1.1.31]
3266	COBS06853	2725.43	1.03477	0.228367	4.0143	5.96e-05	0.00388689	UP	-	-		PTHR47890	LD24308P	NA	NA
3267	COBS06853	2725.43	1.03477	0.228367	4.0143	5.96e-05	0.00388689	UP	IPR032062	Protein of unknown function DUF4803	-	NA	NA	NA	NA
8022	COBS18822	2541.94	1.01641	0.314106	3.85108	0.0001176	0.00650166	UP	-	-		PTHR48041:SF26,PTHR48041	FI22810P1,ABC TRANSPORTER G FAMILY MEMBER 28	NA	NA
8023	COBS18822	2541.94	1.01641	0.314106	3.85108	0.0001176	0.00650166	UP	IPR003439	ABC transporter-like, ATP-binding domain	GO:0005524	NA	NA	K05679	ATP-binding cassette, subfamily G (WHITE), member 1
8024	COBS18822	2541.94	1.01641	0.314106	3.85108	0.0001176	0.00650166	UP	IPR003593	AAA+ ATPase domain	-	NA	NA	K05679	ATP-binding cassette, subfamily G (WHITE), member 1
8025	COBS18822	2541.94	1.01641	0.314106	3.85108	0.0001176	0.00650166	UP	-	-		PTHR48041,PTHR48041:SF26	ABC TRANSPORTER G FAMILY MEMBER 28,FI22810P1	K05679	ATP-binding cassette, subfamily G (WHITE), member 1
8026	COBS18822	2541.94	1.01641	0.314106	3.85108	0.0001176	0.00650166	UP	IPR027417	P-loop containing nucleoside triphosphate hydrolase	-	NA	NA	K05679	ATP-binding cassette, subfamily G (WHITE), member 1
8028	COBS18822	2541.94	1.01641	0.314106	3.85108	0.0001176	0.00650166	UP	-	-		PTHR48041,PTHR48041:SF26	ABC TRANSPORTER G FAMILY MEMBER 28,FI22810P1	NA	NA
8029	COBS18822	2541.94	1.01641	0.314106	3.85108	0.0001176	0.00650166	UP	IPR017871	ABC transporter-like, conserved site	GO:0005524	NA	NA	K05679	ATP-binding cassette, subfamily G (WHITE), member 1
8030	COBS18822	2541.94	1.01641	0.314106	3.85108	0.0001176	0.00650166	UP	IPR013525	ABC-2 type transporter	GO:0016020|GO:0140359	NA	NA	NA	NA
8033	COBS18822	2541.94	1.01641	0.314106	3.85108	0.0001176	0.00650166	UP	IPR043926	ABC transporter family G domain	GO:0140359	NA	NA	K05679	ATP-binding cassette, subfamily G (WHITE), member 1
8036	COBS18822	2541.94	1.01641	0.314106	3.85108	0.0001176	0.00650166	UP	IPR003439	ABC transporter-like, ATP-binding domain	GO:0005524	NA	NA	NA	NA
8037	COBS18822	2541.94	1.01641	0.314106	3.85108	0.0001176	0.00650166	UP	IPR027417	P-loop containing nucleoside triphosphate hydrolase	-	NA	NA	NA	NA
8044	COBS18822	2541.94	1.01641	0.314106	3.85108	0.0001176	0.00650166	UP	IPR013525	ABC-2 type transporter	GO:0016020|GO:0140359	NA	NA	K05679	ATP-binding cassette, subfamily G (WHITE), member 1
8048	COBS18822	2541.94	1.01641	0.314106	3.85108	0.0001176	0.00650166	UP	-	-		PTHR48041:SF26,PTHR48041	FI22810P1,ABC TRANSPORTER G FAMILY MEMBER 28	K05679	ATP-binding cassette, subfamily G (WHITE), member 1
8051	COBS18822	2541.94	1.01641	0.314106	3.85108	0.0001176	0.00650166	UP	IPR017871	ABC transporter-like, conserved site	GO:0005524	NA	NA	NA	NA
8053	COBS18822	2541.94	1.01641	0.314106	3.85108	0.0001176	0.00650166	UP	IPR043926	ABC transporter family G domain	GO:0140359	NA	NA	NA	NA
8079	COBS18822	2541.94	1.01641	0.314106	3.85108	0.0001176	0.00650166	UP	IPR003593	AAA+ ATPase domain	-	NA	NA	NA	NA
451	COBS01395	1667.05	1.01576	0.311462	3.17619	0.00149222	0.0362534	UP	-	-		PTHR12286:SF5,PTHR12286	SACCHAROPINE DEHYDROGENASE-LIKE OXIDOREDUCTASE,UNCHARACTERIZED	NA	NA
452	COBS01395	1667.05	1.01576	0.311462	3.17619	0.00149222	0.0362534	UP	IPR036291	NAD(P)-binding domain superfamily	-	NA	NA	NA	NA
453	COBS01395	1667.05	1.01576	0.311462	3.17619	0.00149222	0.0362534	UP	IPR005097	Saccharopine dehydrogenase, NADP binding domain	GO:0016491	NA	NA	NA	NA
3479	COBS07149	210.729	1.01253	0.313435	3.05407	0.00225757	0.047096	UP	-	-		PTHR14742,PTHR14742:SF0	RIBONUCLEASE P SUBUNIT P21,RIBONUCLEASE P PROTEIN SUBUNIT P21	K03540	ribonuclease P protein subunit RPR2 [EC:3.1.26.5]
3480	COBS07149	210.729	1.01253	0.313435	3.05407	0.00225757	0.047096	UP	IPR007175	Ribonuclease P subunit, Rpr2/Snm1/Rpp21	GO:0006396	NA	NA	K03540	ribonuclease P protein subunit RPR2 [EC:3.1.26.5]
604	COBS01723	887.078	1.01242	0.328615	3.24288	0.00118327	0.0310223	UP	IPR002794	Protein of unknown function DUF92, TMEM19	GO:0016021	PTHR13353	TRANSMEMBRANE PROTEIN 19	NA	NA
7814	COBS18373	5840.37	1.00152	0.240517	3.64973	0.000262517	0.011315	UP	IPR008366	Nuclear factor of activated T cells (NFAT)	GO:0003700|GO:0006355	PTHR12533	NFAT	K17335	nuclear factor of activated T-cells 5
7815	COBS18373	5840.37	1.00152	0.240517	3.64973	0.000262517	0.011315	UP	IPR014756	Immunoglobulin E-set	-	NA	NA	K17335	nuclear factor of activated T-cells 5
7816	COBS18373	5840.37	1.00152	0.240517	3.64973	0.000262517	0.011315	UP	IPR008967	p53-like transcription factor, DNA-binding	GO:0003700|GO:0006355	NA	NA	K17335	nuclear factor of activated T-cells 5
7817	COBS18373	5840.37	1.00152	0.240517	3.64973	0.000262517	0.011315	UP	IPR011539	Rel homology domain (RHD), DNA-binding domain	GO:0003677|GO:0003700|GO:0006355	NA	NA	K17335	nuclear factor of activated T-cells 5
7818	COBS18373	5840.37	1.00152	0.240517	3.64973	0.000262517	0.011315	UP	IPR032397	Rel homology dimerisation domain	-	NA	NA	K17335	nuclear factor of activated T-cells 5
7822	COBS18373	5840.37	1.00152	0.240517	3.64973	0.000262517	0.011315	UP	-	-		PTHR12533:SF7	NFAT NUCLEAR FACTOR, ISOFORM B	K17335	nuclear factor of activated T-cells 5
7823	COBS18373	5840.37	1.00152	0.240517	3.64973	0.000262517	0.011315	UP	IPR002909	IPT domain	-	NA	NA	K17335	nuclear factor of activated T-cells 5
7824	COBS18373	5840.37	1.00152	0.240517	3.64973	0.000262517	0.011315	UP	IPR013783	Immunoglobulin-like fold	-	NA	NA	K17335	nuclear factor of activated T-cells 5
7831	COBS18373	5840.37	1.00152	0.240517	3.64973	0.000262517	0.011315	UP	IPR037059	Rel homology domain (RHD), DNA-binding domain superfamily	GO:0003677|GO:0003700|GO:0006355	NA	NA	K17335	nuclear factor of activated T-cells 5
7767	COBS18059	445.505	1.00046	0.210022	4.60859	4.05e-06	0.000468412	UP	-	-		PTHR13505:SF7	TRANSMEMBRANE PROTEIN 208	NA	NA
7768	COBS18059	445.505	1.00046	0.210022	4.60859	4.05e-06	0.000468412	UP	IPR008506	SRP-independent targeting protein 2/TMEM208	-	PTHR13505	TRANSMEMBRANE PROTEIN 208	NA	NA
282	COBS00794	6947.83	0.998627	0.282059	3.59609	0.000323031	0.0130598	UP	IPR000554	Ribosomal protein S7e	GO:0003735|GO:0005840|GO:0006412	PTHR11278	40S RIBOSOMAL PROTEIN S7	K02993	small subunit ribosomal protein S7e
284	COBS00794	6947.83	0.998627	0.282059	3.59609	0.000323031	0.0130598	UP	-	-		PTHR11278:SF5	40S RIBOSOMAL PROTEIN S7	K02993	small subunit ribosomal protein S7e
7530	COBS16809	828.942	0.997572	0.241667	4.13305	3.58e-05	0.00264195	UP	IPR032443	RAWUL domain	-	NA	NA	K10695	E3 ubiquitin-protein ligase RNF1/2 [EC:2.3.2.27]
7531	COBS16809	828.942	0.997572	0.241667	4.13305	3.58e-05	0.00264195	UP	IPR043540	E3 ubiquitin-protein ligase RING1/RING2	GO:0000151|GO:0035518	PTHR46076	E3 UBIQUITIN-PROTEIN LIGASE RING1 / RING 2 FAMILY MEMBER	K10695	E3 ubiquitin-protein ligase RNF1/2 [EC:2.3.2.27]
7532	COBS16809	828.942	0.997572	0.241667	4.13305	3.58e-05	0.00264195	UP	-	-		PTHR46076:SF2	E3 UBIQUITIN-PROTEIN LIGASE RING1	K10695	E3 ubiquitin-protein ligase RNF1/2 [EC:2.3.2.27]
7533	COBS16809	828.942	0.997572	0.241667	4.13305	3.58e-05	0.00264195	UP	IPR017907	Zinc finger, RING-type, conserved site	-	NA	NA	K10695	E3 ubiquitin-protein ligase RNF1/2 [EC:2.3.2.27]
7534	COBS16809	828.942	0.997572	0.241667	4.13305	3.58e-05	0.00264195	UP	IPR001841	Zinc finger, RING-type	-	NA	NA	K10695	E3 ubiquitin-protein ligase RNF1/2 [EC:2.3.2.27]
7536	COBS16809	828.942	0.997572	0.241667	4.13305	3.58e-05	0.00264195	UP	IPR013083	Zinc finger, RING/FYVE/PHD-type	-	NA	NA	K10695	E3 ubiquitin-protein ligase RNF1/2 [EC:2.3.2.27]
3615	COBS07737	9975.46	0.980687	0.280927	3.66135	0.00025089	0.0109305	UP	IPR013843	Ribosomal protein S4e, N-terminal	-	NA	NA	K02987	small subunit ribosomal protein S4e
3616	COBS07737	9975.46	0.980687	0.280927	3.66135	0.00025089	0.0109305	UP	IPR018199	Ribosomal protein S4e, N-terminal, conserved site	-	NA	NA	K02987	small subunit ribosomal protein S4e
3617	COBS07737	9975.46	0.980687	0.280927	3.66135	0.00025089	0.0109305	UP	IPR000876	Ribosomal protein S4e	GO:0003735|GO:0005840|GO:0006412	PTHR11581	30S/40S RIBOSOMAL PROTEIN S4	K02987	small subunit ribosomal protein S4e
3618	COBS07737	9975.46	0.980687	0.280927	3.66135	0.00025089	0.0109305	UP	IPR002942	RNA-binding S4 domain	GO:0003723	NA	NA	K02987	small subunit ribosomal protein S4e
3619	COBS07737	9975.46	0.980687	0.280927	3.66135	0.00025089	0.0109305	UP	IPR041982	Ribosomal protein S4, KOW domain	-	NA	NA	K02987	small subunit ribosomal protein S4e
3620	COBS07737	9975.46	0.980687	0.280927	3.66135	0.00025089	0.0109305	UP	IPR036986	RNA-binding S4 domain superfamily	GO:0003723	NA	NA	K02987	small subunit ribosomal protein S4e
3621	COBS07737	9975.46	0.980687	0.280927	3.66135	0.00025089	0.0109305	UP	IPR005824	KOW	-	NA	NA	K02987	small subunit ribosomal protein S4e
3622	COBS07737	9975.46	0.980687	0.280927	3.66135	0.00025089	0.0109305	UP	IPR013845	Ribosomal protein S4e, central region	-	NA	NA	K02987	small subunit ribosomal protein S4e
3624	COBS07737	9975.46	0.980687	0.280927	3.66135	0.00025089	0.0109305	UP	IPR014722	Ribosomal protein L2, domain 2	-	NA	NA	K02987	small subunit ribosomal protein S4e
3625	COBS07737	9975.46	0.980687	0.280927	3.66135	0.00025089	0.0109305	UP	IPR032277	40S ribosomal protein S4, C-terminal domain	-	NA	NA	K02987	small subunit ribosomal protein S4e
3632	COBS07737	9975.46	0.980687	0.280927	3.66135	0.00025089	0.0109305	UP	IPR038237	Ribosomal protein S4e, central domain superfamily	-	NA	NA	K02987	small subunit ribosomal protein S4e
3635	COBS07737	9975.46	0.980687	0.280927	3.66135	0.00025089	0.0109305	UP	-	-		PTHR11581:SF33	40S RIBOSOMAL PROTEIN S4	K02987	small subunit ribosomal protein S4e
2672	COBS05734	1223.99	0.976456	0.265382	3.45949	0.000541204	0.0182101	UP	IPR000133	ER lumen protein retaining receptor	GO:0006621|GO:0016021|GO:0046923	PTHR10585	ER LUMEN PROTEIN RETAINING RECEPTOR	K10949	ER lumen protein retaining receptor
2673	COBS05734	1223.99	0.976456	0.265382	3.45949	0.000541204	0.0182101	UP	-	-		PTHR10585:SF83	ER LUMEN PROTEIN-RETAINING RECEPTOR 2	K10949	ER lumen protein retaining receptor
7613	COBS17267	736.134	0.974333	0.303308	3.27713	0.00104867	0.029022	UP	-	-		PTHR11360	MONOCARBOXYLATE TRANSPORTER	NA	NA
7614	COBS17267	736.134	0.974333	0.303308	3.27713	0.00104867	0.029022	UP	IPR036259	MFS transporter superfamily	-	NA	NA	NA	NA
7615	COBS17267	736.134	0.974333	0.303308	3.27713	0.00104867	0.029022	UP	IPR011701	Major facilitator superfamily	GO:0022857|GO:0055085	NA	NA	NA	NA
4548	COBS09437	5043.42	0.973832	0.316474	3.21394	0.00130926	0.0330398	UP	IPR022803	Ribosomal protein L5 domain superfamily	-	NA	NA	K02868	large subunit ribosomal protein L11e
4549	COBS09437	5043.42	0.973832	0.316474	3.21394	0.00130926	0.0330398	UP	IPR031310	Ribosomal protein L5, N-terminal	-	NA	NA	K02868	large subunit ribosomal protein L11e
4550	COBS09437	5043.42	0.973832	0.316474	3.21394	0.00130926	0.0330398	UP	IPR002132	Ribosomal protein L5	GO:0003735|GO:0005840|GO:0006412	PTHR11994	60S RIBOSOMAL PROTEIN L11-RELATED	K02868	large subunit ribosomal protein L11e
4551	COBS09437	5043.42	0.973832	0.316474	3.21394	0.00130926	0.0330398	UP	IPR020929	Ribosomal protein L5, conserved site	GO:0003735|GO:0005840|GO:0006412	NA	NA	K02868	large subunit ribosomal protein L11e
4552	COBS09437	5043.42	0.973832	0.316474	3.21394	0.00130926	0.0330398	UP	-	-		PTHR11994:SF23	60S RIBOSOMAL PROTEIN L11	K02868	large subunit ribosomal protein L11e
4554	COBS09437	5043.42	0.973832	0.316474	3.21394	0.00130926	0.0330398	UP	IPR031309	Ribosomal protein L5, C-terminal	-	NA	NA	K02868	large subunit ribosomal protein L11e
7772	COBS18070	674.296	0.972885	0.280551	3.66292	0.000249354	0.0108977	UP	-	-		PTHR16189:SF0,PTHR16189	TRANSMEMBRANE PROTEIN 104,UNCHARACTERIZED	NA	NA
7773	COBS18070	674.296	0.972885	0.280551	3.66292	0.000249354	0.0108977	UP	IPR013057	Amino acid transporter, transmembrane domain	-	NA	NA	NA	NA
7774	COBS18070	674.296	0.972885	0.280551	3.66292	0.000249354	0.0108977	UP	-	-		PTHR16189,PTHR16189:SF0	UNCHARACTERIZED,TRANSMEMBRANE PROTEIN 104	NA	NA
7408	COBS16289	6013.88	0.97202	0.254579	4.01639	5.91e-05	0.00386877	UP	-	-		PTHR12640:SF0	DOLICHYL-DIPHOSPHOOLIGOSACCHARIDE--PROTEIN GLYCOSYLTRANSFERASE SUBUNIT 2	K12667	dolichyl-diphosphooligosaccharide---protein glycosyltransferase subunit 2 (ribophorin II)
7410	COBS16289	6013.88	0.97202	0.254579	4.01639	5.91e-05	0.00386877	UP	IPR008814	Dolichyl-diphosphooligosaccharide--protein glycosyltransferase subunit Swp1	GO:0006487|GO:0008250|GO:0016021	PTHR12640	RIBOPHORIN II	K12667	dolichyl-diphosphooligosaccharide---protein glycosyltransferase subunit 2 (ribophorin II)
5880	COBS12514	308.714	0.964746	0.29293	3.24288	0.00118328	0.0310223	UP	IPR015897	CHK kinase-like	-	NA	NA	NA	NA
5881	COBS12514	308.714	0.964746	0.29293	3.24288	0.00118328	0.0310223	UP	IPR011009	Protein kinase-like domain superfamily	-	NA	NA	NA	NA
5882	COBS12514	308.714	0.964746	0.29293	3.24288	0.00118328	0.0310223	UP	-	-		PTHR11012	UNCHARACTERIZED	NA	NA
5885	COBS12514	308.714	0.964746	0.29293	3.24288	0.00118328	0.0310223	UP	IPR004119	Ecdysteroid kinase-like	-	NA	NA	NA	NA
6442	COBS14989	144.368	0.958016	0.271108	3.72435	0.000195816	0.0092004	UP	-	-		PTHR12461:SF2,PTHR12461	BIFUNCTIONAL PEPTIDASE AND (3S)-LYSYL HYDROXYLASE JMJD7,HYPOXIA-INDUCIBLE FACTOR 1 ALPHA INHIBITOR-RELATED	K19219	peptidyl-lysine (3S)-dioxygenase / protease [EC:1.14.11.63 3.4.-.-]
6443	COBS14989	144.368	0.958016	0.271108	3.72435	0.000195816	0.0092004	UP	IPR003347	JmjC domain	-	NA	NA	K19219	peptidyl-lysine (3S)-dioxygenase / protease [EC:1.14.11.63 3.4.-.-]
6444	COBS14989	144.368	0.958016	0.271108	3.72435	0.000195816	0.0092004	UP	IPR041667	Cupin-like domain 8	-	NA	NA	K19219	peptidyl-lysine (3S)-dioxygenase / protease [EC:1.14.11.63 3.4.-.-]
6445	COBS14989	144.368	0.958016	0.271108	3.72435	0.000195816	0.0092004	UP	IPR014710	RmlC-like jelly roll fold	-	NA	NA	K19219	peptidyl-lysine (3S)-dioxygenase / protease [EC:1.14.11.63 3.4.-.-]
7276	COBS15669	5755.08	0.955446	0.265369	3.95709	7.59e-05	0.00480574	UP	IPR046347	Basic-leucine zipper domain superfamily	GO:0003700|GO:0006355	NA	NA	K09048	cyclic AMP-responsive element-binding protein 3
7277	COBS15669	5755.08	0.955446	0.265369	3.95709	7.59e-05	0.00480574	UP	-	-		PTHR45996:SF3,PTHR45996	AGAP001464-PB,AGAP001464-PB	K09048	cyclic AMP-responsive element-binding protein 3
7278	COBS15669	5755.08	0.955446	0.265369	3.95709	7.59e-05	0.00480574	UP	IPR004827	Basic-leucine zipper domain	GO:0003700|GO:0006355	NA	NA	K09048	cyclic AMP-responsive element-binding protein 3
4772	COBS09687	547.613	0.951031	0.329698	3.32721	0.000877218	0.0257983	UP	IPR013818	Lipase	GO:0016298	NA	NA	K14073	pancreatic triacylglycerol lipase [EC:3.1.1.3]
4773	COBS09687	547.613	0.951031	0.329698	3.32721	0.000877218	0.0257983	UP	IPR002331	Pancreatic lipase	GO:0004806|GO:0006629	NA	NA	K14073	pancreatic triacylglycerol lipase [EC:3.1.1.3]
4774	COBS09687	547.613	0.951031	0.329698	3.32721	0.000877218	0.0257983	UP	-	-		PTHR11610:SF160	LD47264P	K14073	pancreatic triacylglycerol lipase [EC:3.1.1.3]
4775	COBS09687	547.613	0.951031	0.329698	3.32721	0.000877218	0.0257983	UP	IPR000734	Triacylglycerol lipase family	GO:0016298	PTHR11610	LIPASE	K14073	pancreatic triacylglycerol lipase [EC:3.1.1.3]
4776	COBS09687	547.613	0.951031	0.329698	3.32721	0.000877218	0.0257983	UP	IPR033906	Lipase, N-terminal	GO:0006629	NA	NA	K14073	pancreatic triacylglycerol lipase [EC:3.1.1.3]
4777	COBS09687	547.613	0.951031	0.329698	3.32721	0.000877218	0.0257983	UP	IPR016272	Lipase, LIPH-type	GO:0006629|GO:0052689	NA	NA	K14073	pancreatic triacylglycerol lipase [EC:3.1.1.3]
4778	COBS09687	547.613	0.951031	0.329698	3.32721	0.000877218	0.0257983	UP	IPR029058	Alpha/Beta hydrolase fold	-	NA	NA	K14073	pancreatic triacylglycerol lipase [EC:3.1.1.3]
4779	COBS09687	547.613	0.951031	0.329698	3.32721	0.000877218	0.0257983	UP	IPR036392	PLAT/LH2 domain superfamily	GO:0005515	NA	NA	K14073	pancreatic triacylglycerol lipase [EC:3.1.1.3]
8007	COBS18813	405.881	0.949991	0.277203	3.12856	0.00175665	0.0407179	UP	IPR012675	Beta-grasp domain superfamily	-	NA	NA	K06944	developmentally-regulated GTP-binding protein [EC:3.6.5.-]
8008	COBS18813	405.881	0.949991	0.277203	3.12856	0.00175665	0.0407179	UP	IPR004095	TGS	-	NA	NA	K06944	developmentally-regulated GTP-binding protein [EC:3.6.5.-]
8009	COBS18813	405.881	0.949991	0.277203	3.12856	0.00175665	0.0407179	UP	-	-		PTHR43127:SF2	DEVELOPMENTALLY-REGULATED GTP-BINDING PROTEIN 2	K06944	developmentally-regulated GTP-binding protein [EC:3.6.5.-]
8010	COBS18813	405.881	0.949991	0.277203	3.12856	0.00175665	0.0407179	UP	IPR031167	OBG-type guanine nucleotide-binding (G) domain	GO:0005525	NA	NA	K06944	developmentally-regulated GTP-binding protein [EC:3.6.5.-]
8011	COBS18813	405.881	0.949991	0.277203	3.12856	0.00175665	0.0407179	UP	IPR031662	GTP binding protein, second domain	-	NA	NA	K06944	developmentally-regulated GTP-binding protein [EC:3.6.5.-]
8012	COBS18813	405.881	0.949991	0.277203	3.12856	0.00175665	0.0407179	UP	IPR027417	P-loop containing nucleoside triphosphate hydrolase	-	NA	NA	K06944	developmentally-regulated GTP-binding protein [EC:3.6.5.-]
8013	COBS18813	405.881	0.949991	0.277203	3.12856	0.00175665	0.0407179	UP	IPR006073	GTP binding domain	GO:0005525	NA	NA	K06944	developmentally-regulated GTP-binding protein [EC:3.6.5.-]
8014	COBS18813	405.881	0.949991	0.277203	3.12856	0.00175665	0.0407179	UP	IPR045001	Developmentally regulated GTP-binding protein	GO:0003924|GO:0005525	PTHR43127	-	K06944	developmentally-regulated GTP-binding protein [EC:3.6.5.-]
8015	COBS18813	405.881	0.949991	0.277203	3.12856	0.00175665	0.0407179	UP	IPR006074	GTP1/OBG, conserved site	GO:0005525	NA	NA	K06944	developmentally-regulated GTP-binding protein [EC:3.6.5.-]
8016	COBS18813	405.881	0.949991	0.277203	3.12856	0.00175665	0.0407179	UP	IPR005225	Small GTP-binding protein domain	GO:0005525	NA	NA	K06944	developmentally-regulated GTP-binding protein [EC:3.6.5.-]
7648	COBS17471	769.421	0.949138	0.306871	3.04303	0.00234208	0.048216	UP	IPR002524	Cation efflux protein	GO:0006812|GO:0008324|GO:0016021|GO:0055085	NA	NA	K14692	solute carrier family 30 (zinc transporter), member 5/7
7649	COBS17471	769.421	0.949138	0.306871	3.04303	0.00234208	0.048216	UP	IPR045316	Zinc transporter Msc2-like	GO:0005385|GO:0006829|GO:0006882	PTHR45755	-	K14692	solute carrier family 30 (zinc transporter), member 5/7
7650	COBS17471	769.421	0.949138	0.306871	3.04303	0.00234208	0.048216	UP	IPR027469	Cation efflux transmembrane domain superfamily	-	NA	NA	K14692	solute carrier family 30 (zinc transporter), member 5/7
7651	COBS17471	769.421	0.949138	0.306871	3.04303	0.00234208	0.048216	UP	-	-		PTHR45755:SF4	ZINC TRANSPORTER 7	K14692	solute carrier family 30 (zinc transporter), member 5/7
6930	COBS15274	3087.27	0.948758	0.284217	3.69579	0.000219202	0.00985529	UP	IPR014756	Immunoglobulin E-set	-	NA	NA	K09540	translocation protein SEC63
6931	COBS15274	3087.27	0.948758	0.284217	3.69579	0.000219202	0.00985529	UP	IPR027137	Translocation protein Sec63	GO:0031204	PTHR24075:SF0	TRANSLOCATION PROTEIN SEC63 HOMOLOG	K09540	translocation protein SEC63
6932	COBS15274	3087.27	0.948758	0.284217	3.69579	0.000219202	0.00985529	UP	IPR035892	C2 domain superfamily	-	NA	NA	K09540	translocation protein SEC63
6933	COBS15274	3087.27	0.948758	0.284217	3.69579	0.000219202	0.00985529	UP	IPR001623	DnaJ domain	-	NA	NA	K09540	translocation protein SEC63
6934	COBS15274	3087.27	0.948758	0.284217	3.69579	0.000219202	0.00985529	UP	-	-		PTHR24075	SEC63 DOMAIN-CONTAINING	K09540	translocation protein SEC63
6935	COBS15274	3087.27	0.948758	0.284217	3.69579	0.000219202	0.00985529	UP	IPR036869	Chaperone J-domain superfamily	-	NA	NA	K09540	translocation protein SEC63
6936	COBS15274	3087.27	0.948758	0.284217	3.69579	0.000219202	0.00985529	UP	IPR004179	Sec63 domain	-	NA	NA	K09540	translocation protein SEC63
5778	COBS12205	5414.12	0.947532	0.321213	3.13357	0.00172694	0.040208	UP	IPR012678	Ribosomal protein L23/L15e core domain superfamily	GO:0003735|GO:0005840|GO:0006412	NA	NA	K02877	large subunit ribosomal protein L15e
5779	COBS12205	5414.12	0.947532	0.321213	3.13357	0.00172694	0.040208	UP	IPR000439	Ribosomal protein L15e	GO:0003735|GO:0005840|GO:0006412	PTHR11847	RIBOSOMAL PROTEIN L15	K02877	large subunit ribosomal protein L15e
5780	COBS12205	5414.12	0.947532	0.321213	3.13357	0.00172694	0.040208	UP	IPR020925	Ribosomal protein L15e, conserved site	GO:0003735|GO:0005840|GO:0006412	NA	NA	K02877	large subunit ribosomal protein L15e
5781	COBS12205	5414.12	0.947532	0.321213	3.13357	0.00172694	0.040208	UP	-	-		PTHR11847:SF4	60S RIBOSOMAL PROTEIN L15	K02877	large subunit ribosomal protein L15e
5782	COBS12205	5414.12	0.947532	0.321213	3.13357	0.00172694	0.040208	UP	IPR024794	Ribosomal protein L15e core domain superfamily	GO:0003735|GO:0005840	NA	NA	K02877	large subunit ribosomal protein L15e
3578	COBS07590	13968.4	0.945962	0.449207	3.11587	0.00183402	0.0415268	UP	IPR017853	Glycoside hydrolase superfamily	-	NA	NA	K01183	chitinase [EC:3.2.1.14]
3579	COBS07590	13968.4	0.945962	0.449207	3.11587	0.00183402	0.0415268	UP	-	-		PTHR11177	CHITINASE	K01183	chitinase [EC:3.2.1.14]
3580	COBS07590	13968.4	0.945962	0.449207	3.11587	0.00183402	0.0415268	UP	IPR001223	Glycoside hydrolase family 18, catalytic domain	GO:0005975	NA	NA	K01183	chitinase [EC:3.2.1.14]
3581	COBS07590	13968.4	0.945962	0.449207	3.11587	0.00183402	0.0415268	UP	IPR011583	Chitinase II	GO:0008061	NA	NA	K01183	chitinase [EC:3.2.1.14]
3582	COBS07590	13968.4	0.945962	0.449207	3.11587	0.00183402	0.0415268	UP	IPR029070	Chitinase insertion domain superfamily	-	NA	NA	K01183	chitinase [EC:3.2.1.14]
3589	COBS07590	13968.4	0.945962	0.449207	3.11587	0.00183402	0.0415268	UP	IPR015520	Imaginal disc growth factor	-	PTHR11177:SF235	CHITINASE-LIKE PROTEIN IDGF1-RELATED	K01183	chitinase [EC:3.2.1.14]
7983	COBS18672	13719.3	0.939388	0.281288	3.79033	0.00015045	0.00771782	UP	-	-		PTHR24012:SF805,PTHR24012	POLYADENYLATE-BINDING PROTEIN,RNA BINDING PROTEIN	K13126	polyadenylate-binding protein
7984	COBS18672	13719.3	0.939388	0.281288	3.79033	0.00015045	0.00771782	UP	IPR036053	PABC (PABP) domain	GO:0003723	NA	NA	K13126	polyadenylate-binding protein
7985	COBS18672	13719.3	0.939388	0.281288	3.79033	0.00015045	0.00771782	UP	IPR002004	Polyadenylate-binding protein/Hyperplastic disc protein	GO:0003723	NA	NA	K13126	polyadenylate-binding protein
7986	COBS18672	13719.3	0.939388	0.281288	3.79033	0.00015045	0.00771782	UP	IPR000504	RNA recognition motif domain	GO:0003723	NA	NA	K13126	polyadenylate-binding protein
7987	COBS18672	13719.3	0.939388	0.281288	3.79033	0.00015045	0.00771782	UP	IPR006515	Polyadenylate binding protein, human types 1, 2, 3, 4	GO:0003723	NA	NA	K13126	polyadenylate-binding protein
7988	COBS18672	13719.3	0.939388	0.281288	3.79033	0.00015045	0.00771782	UP	IPR012677	Nucleotide-binding alpha-beta plait domain superfamily	-	NA	NA	K13126	polyadenylate-binding protein
7989	COBS18672	13719.3	0.939388	0.281288	3.79033	0.00015045	0.00771782	UP	IPR003954	RNA recognition motif domain, eukaryote	GO:0003676	NA	NA	K13126	polyadenylate-binding protein
7990	COBS18672	13719.3	0.939388	0.281288	3.79033	0.00015045	0.00771782	UP	IPR045305	PABP, RNA recognition motif 2	-	NA	NA	K13126	polyadenylate-binding protein
7991	COBS18672	13719.3	0.939388	0.281288	3.79033	0.00015045	0.00771782	UP	IPR035979	RNA-binding domain superfamily	GO:0003676	NA	NA	K13126	polyadenylate-binding protein
5723	COBS11742	5642.97	0.932243	0.326102	3.34558	0.000821101	0.0245639	UP	IPR000301	Tetraspanin, animals	GO:0016021	NA	NA	NA	NA
5724	COBS11742	5642.97	0.932243	0.326102	3.34558	0.000821101	0.0245639	UP	IPR018499	Tetraspanin/Peripherin	GO:0016021	PTHR19282	TETRASPANIN	NA	NA
5725	COBS11742	5642.97	0.932243	0.326102	3.34558	0.000821101	0.0245639	UP	-	-		PTHR19282:SF273	TETRASPANIN	NA	NA
5726	COBS11742	5642.97	0.932243	0.326102	3.34558	0.000821101	0.0245639	UP	IPR008952	Tetraspanin, EC2 domain superfamily	GO:0016021	NA	NA	NA	NA
5727	COBS11742	5642.97	0.932243	0.326102	3.34558	0.000821101	0.0245639	UP	IPR018503	Tetraspanin, conserved site	GO:0016021	NA	NA	NA	NA
2079	COBS04832	2751.74	0.929052	0.286755	3.6319	0.000281341	0.011833	UP	IPR012258	Acyl-CoA oxidase	GO:0003997|GO:0005777|GO:0006631|GO:0071949	PTHR10909	ELECTRON TRANSPORT OXIDOREDUCTASE	K00232	acyl-CoA oxidase [EC:1.3.3.6]
2080	COBS04832	2751.74	0.929052	0.286755	3.6319	0.000281341	0.011833	UP	-	-		PTHR10909:SF250	ACYL-COENZYME A OXIDASE	K00232	acyl-CoA oxidase [EC:1.3.3.6]
2081	COBS04832	2751.74	0.929052	0.286755	3.6319	0.000281341	0.011833	UP	IPR046373	Acyl-CoA oxidase/dehydrogenase, middle domain superfamily	GO:0016627	NA	NA	K00232	acyl-CoA oxidase [EC:1.3.3.6]
2082	COBS04832	2751.74	0.929052	0.286755	3.6319	0.000281341	0.011833	UP	IPR006091	Acyl-CoA oxidase/dehydrogenase, middle domain	GO:0016627	NA	NA	K00232	acyl-CoA oxidase [EC:1.3.3.6]
2083	COBS04832	2751.74	0.929052	0.286755	3.6319	0.000281341	0.011833	UP	IPR029320	Acyl-coenzyme A oxidase, N-terminal	-	NA	NA	K00232	acyl-CoA oxidase [EC:1.3.3.6]
2084	COBS04832	2751.74	0.929052	0.286755	3.6319	0.000281341	0.011833	UP	IPR037069	Acyl-CoA dehydrogenase/oxidase, N-terminal domain superfamily	GO:0016627|GO:0050660	NA	NA	K00232	acyl-CoA oxidase [EC:1.3.3.6]
2085	COBS04832	2751.74	0.929052	0.286755	3.6319	0.000281341	0.011833	UP	IPR002655	Acyl-CoA oxidase, C-terminal	GO:0003997|GO:0005777|GO:0006635	NA	NA	K00232	acyl-CoA oxidase [EC:1.3.3.6]
2086	COBS04832	2751.74	0.929052	0.286755	3.6319	0.000281341	0.011833	UP	IPR009100	Acyl-CoA dehydrogenase/oxidase, N-terminal and middle domain superfamily	GO:0016627	NA	NA	K00232	acyl-CoA oxidase [EC:1.3.3.6]
2089	COBS04832	2751.74	0.929052	0.286755	3.6319	0.000281341	0.011833	UP	IPR036250	Acyl-CoA dehydrogenase-like, C-terminal	GO:0016627	NA	NA	K00232	acyl-CoA oxidase [EC:1.3.3.6]
7482	COBS16556	3632.81	0.921963	0.287788	3.09098	0.00199497	0.0437248	UP	IPR036967	Ribosomal protein S11 superfamily	GO:0003735|GO:0005840|GO:0006412	NA	NA	K02955	small subunit ribosomal protein S14e
7483	COBS16556	3632.81	0.921963	0.287788	3.09098	0.00199497	0.0437248	UP	IPR018102	Ribosomal S11, conserved site	-	NA	NA	K02955	small subunit ribosomal protein S14e
7484	COBS16556	3632.81	0.921963	0.287788	3.09098	0.00199497	0.0437248	UP	-	-		PTHR11759:SF37	BNAA05G27530D PROTEIN	K02955	small subunit ribosomal protein S14e
7485	COBS16556	3632.81	0.921963	0.287788	3.09098	0.00199497	0.0437248	UP	IPR001971	Ribosomal protein S11	GO:0003735|GO:0005840|GO:0006412	PTHR11759	40S RIBOSOMAL PROTEIN S14/30S RIBOSOMAL PROTEIN S11	K02955	small subunit ribosomal protein S14e
3606	COBS07667	7394.78	0.920512	0.283391	3.48089	0.000499748	0.0173371	UP	-	-		NA	NA	K02943	large subunit ribosomal protein LP2
3607	COBS07667	7394.78	0.920512	0.283391	3.48089	0.000499748	0.0173371	UP	IPR027534	Ribosomal protein L12/P1/P2 family	GO:0003735|GO:0005840|GO:0006414	NA	NA	K02943	large subunit ribosomal protein LP2
3608	COBS07667	7394.78	0.920512	0.283391	3.48089	0.000499748	0.0173371	UP	IPR038716	Ribosomal protein P1/P2, N-terminal domain	-	NA	NA	K02943	large subunit ribosomal protein LP2
3611	COBS07667	7394.78	0.920512	0.283391	3.48089	0.000499748	0.0173371	UP	IPR044076	Ribosomal protein P2	GO:0002182|GO:0003735|GO:0022625	PTHR21141	60S ACIDIC RIBOSOMAL PROTEIN FAMILY MEMBER	K02943	large subunit ribosomal protein LP2
2579	COBS05537	1345.43	0.913439	0.303843	3.26884	0.0010799	0.029232	UP	IPR019801	Glycoside hydrolase, family 35, conserved site	GO:0004553|GO:0005975	NA	NA	K12309	beta-galactosidase [EC:3.2.1.23]
2580	COBS05537	1345.43	0.913439	0.303843	3.26884	0.0010799	0.029232	UP	IPR001944	Glycoside hydrolase, family 35	GO:0004553|GO:0005975	PTHR23421	BETA-GALACTOSIDASE RELATED	K12309	beta-galactosidase [EC:3.2.1.23]
2581	COBS05537	1345.43	0.913439	0.303843	3.26884	0.0010799	0.029232	UP	IPR031330	Glycoside hydrolase 35, catalytic domain	-	NA	NA	K12309	beta-galactosidase [EC:3.2.1.23]
2582	COBS05537	1345.43	0.913439	0.303843	3.26884	0.0010799	0.029232	UP	IPR031330	Glycoside hydrolase 35, catalytic domain	-	NA	NA	K12308	beta-galactosidase [EC:3.2.1.23]
2583	COBS05537	1345.43	0.913439	0.303843	3.26884	0.0010799	0.029232	UP	IPR025300	Beta-galactosidase jelly roll domain	-	NA	NA	K12309	beta-galactosidase [EC:3.2.1.23]
2584	COBS05537	1345.43	0.913439	0.303843	3.26884	0.0010799	0.029232	UP	IPR026283	Beta-galactosidase 1-like	GO:0004565	NA	NA	K12308	beta-galactosidase [EC:3.2.1.23]
2585	COBS05537	1345.43	0.913439	0.303843	3.26884	0.0010799	0.029232	UP	IPR026283	Beta-galactosidase 1-like	GO:0004565	NA	NA	K12309	beta-galactosidase [EC:3.2.1.23]
2586	COBS05537	1345.43	0.913439	0.303843	3.26884	0.0010799	0.029232	UP	IPR017853	Glycoside hydrolase superfamily	-	NA	NA	K12309	beta-galactosidase [EC:3.2.1.23]
2587	COBS05537	1345.43	0.913439	0.303843	3.26884	0.0010799	0.029232	UP	IPR001944	Glycoside hydrolase, family 35	GO:0004553|GO:0005975	PTHR23421	BETA-GALACTOSIDASE RELATED	K12308	beta-galactosidase [EC:3.2.1.23]
2588	COBS05537	1345.43	0.913439	0.303843	3.26884	0.0010799	0.029232	UP	-	-		PTHR23421:SF172	BETA-GALACTOSIDASE	K12308	beta-galactosidase [EC:3.2.1.23]
2589	COBS05537	1345.43	0.913439	0.303843	3.26884	0.0010799	0.029232	UP	IPR008979	Galactose-binding-like domain superfamily	-	NA	NA	K12309	beta-galactosidase [EC:3.2.1.23]
2590	COBS05537	1345.43	0.913439	0.303843	3.26884	0.0010799	0.029232	UP	IPR017853	Glycoside hydrolase superfamily	-	NA	NA	K12308	beta-galactosidase [EC:3.2.1.23]
2591	COBS05537	1345.43	0.913439	0.303843	3.26884	0.0010799	0.029232	UP	IPR025300	Beta-galactosidase jelly roll domain	-	NA	NA	K12308	beta-galactosidase [EC:3.2.1.23]
2592	COBS05537	1345.43	0.913439	0.303843	3.26884	0.0010799	0.029232	UP	IPR008979	Galactose-binding-like domain superfamily	-	NA	NA	K12308	beta-galactosidase [EC:3.2.1.23]
2593	COBS05537	1345.43	0.913439	0.303843	3.26884	0.0010799	0.029232	UP	IPR019801	Glycoside hydrolase, family 35, conserved site	GO:0004553|GO:0005975	NA	NA	K12308	beta-galactosidase [EC:3.2.1.23]
2594	COBS05537	1345.43	0.913439	0.303843	3.26884	0.0010799	0.029232	UP	-	-		PTHR23421:SF172	BETA-GALACTOSIDASE	K12309	beta-galactosidase [EC:3.2.1.23]
4780	COBS09718	396.63	0.910643	0.20252	4.3099	1.63e-05	0.00136652	UP	IPR036047	F-box-like domain superfamily	GO:0005515	NA	NA	NA	NA
4781	COBS09718	396.63	0.910643	0.20252	4.3099	1.63e-05	0.00136652	UP	-	-		NA	NA	NA	NA
4782	COBS09718	396.63	0.910643	0.20252	4.3099	1.63e-05	0.00136652	UP	IPR007397	F-box associated (FBA) domain	-	NA	NA	NA	NA
4784	COBS09718	396.63	0.910643	0.20252	4.3099	1.63e-05	0.00136652	UP	IPR039752	F-box only protein	-	PTHR12125	F-BOX ONLY PROTEIN 6-LIKE PROTEIN	NA	NA
4785	COBS09718	396.63	0.910643	0.20252	4.3099	1.63e-05	0.00136652	UP	IPR008979	Galactose-binding-like domain superfamily	-	NA	NA	NA	NA
4786	COBS09718	396.63	0.910643	0.20252	4.3099	1.63e-05	0.00136652	UP	IPR001810	F-box domain	GO:0005515	NA	NA	NA	NA
3743	COBS08175	493.957	0.90829	0.280392	3.09018	0.00200033	0.0437248	UP	IPR037689	BAG family molecular chaperone regulator 2	GO:0000774|GO:0051087	PTHR12334	BAG FAMILY MOLECULAR CHAPERONE REGULATOR 2	K09556	BCL2-associated athanogene 2
3744	COBS08175	493.957	0.90829	0.280392	3.09018	0.00200033	0.0437248	UP	-	-		NA	NA	K09556	BCL2-associated athanogene 2
7398	COBS16109	5887.77	0.908091	0.235941	3.70578	0.00021074	0.00969774	UP	IPR012678	Ribosomal protein L23/L15e core domain superfamily	GO:0003735|GO:0005840|GO:0006412	NA	NA	K02893	large subunit ribosomal protein L23Ae
7399	COBS16109	5887.77	0.908091	0.235941	3.70578	0.00021074	0.00969774	UP	IPR013025	Ribosomal protein L25/L23	GO:0003735|GO:0005840|GO:0006412	PTHR11620	60S RIBOSOMAL PROTEIN L23A	K02893	large subunit ribosomal protein L23Ae
7400	COBS16109	5887.77	0.908091	0.235941	3.70578	0.00021074	0.00969774	UP	IPR012677	Nucleotide-binding alpha-beta plait domain superfamily	-	NA	NA	K02893	large subunit ribosomal protein L23Ae
7401	COBS16109	5887.77	0.908091	0.235941	3.70578	0.00021074	0.00969774	UP	IPR019985	Ribosomal protein L23	GO:0003735|GO:0005840|GO:0006412	NA	NA	K02893	large subunit ribosomal protein L23Ae
7402	COBS16109	5887.77	0.908091	0.235941	3.70578	0.00021074	0.00969774	UP	IPR005633	Ribosomal protein L23/L25, N-terminal	-	NA	NA	K02893	large subunit ribosomal protein L23Ae
7403	COBS16109	5887.77	0.908091	0.235941	3.70578	0.00021074	0.00969774	UP	-	-		PTHR11620:SF2	RIBOSOMAL PROTEIN L23A	K02893	large subunit ribosomal protein L23Ae
7404	COBS16109	5887.77	0.908091	0.235941	3.70578	0.00021074	0.00969774	UP	IPR001014	Ribosomal protein L23/L25, conserved site	-	NA	NA	K02893	large subunit ribosomal protein L23Ae
5504	COBS11378	2035.32	0.902914	0.375765	3.34755	0.000815296	0.0244839	UP	IPR001611	Leucine-rich repeat	GO:0005515	NA	NA	NA	NA
5505	COBS11378	2035.32	0.902914	0.375765	3.34755	0.000815296	0.0244839	UP	IPR003591	Leucine-rich repeat, typical subtype	-	NA	NA	NA	NA
5506	COBS11378	2035.32	0.902914	0.375765	3.34755	0.000815296	0.0244839	UP	-	-		PTHR24373,PTHR24373:SF349	SLIT RELATED LEUCINE-RICH REPEAT NEURONAL PROTEIN,LEUCINE-RICH REPEAT NEURONAL PROTEIN 1-LIKE PROTEIN	NA	NA
5507	COBS11378	2035.32	0.902914	0.375765	3.34755	0.000815296	0.0244839	UP	IPR032675	Leucine-rich repeat domain superfamily	-	NA	NA	NA	NA
7873	COBS18535	883.808	0.892894	0.29722	3.0398	0.00236738	0.0486486	UP	IPR024989	Major facilitator superfamily associated domain	-	NA	NA	NA	NA
7874	COBS18535	883.808	0.892894	0.29722	3.0398	0.00236738	0.0486486	UP	-	-		PTHR16172:SF30,PTHR16172	SUGAR BABY, ISOFORM C,UNCHARACTERIZED	NA	NA
7875	COBS18535	883.808	0.892894	0.29722	3.0398	0.00236738	0.0486486	UP	-	-		PTHR16172,PTHR16172:SF30	UNCHARACTERIZED,SUGAR BABY, ISOFORM C	NA	NA
7876	COBS18535	883.808	0.892894	0.29722	3.0398	0.00236738	0.0486486	UP	IPR036259	MFS transporter superfamily	-	NA	NA	NA	NA
8142	COBS19008	5698.62	0.890908	0.275322	3.09061	0.00199744	0.0437248	UP	IPR001976	Ribosomal protein S24e	GO:0003735|GO:0005840|GO:0006412	PTHR10496	40S RIBOSOMAL PROTEIN S24	K02974	small subunit ribosomal protein S24e
8143	COBS19008	5698.62	0.890908	0.275322	3.09061	0.00199744	0.0437248	UP	-	-		NA	NA	K02974	small subunit ribosomal protein S24e
8144	COBS19008	5698.62	0.890908	0.275322	3.09061	0.00199744	0.0437248	UP	IPR018098	Ribosomal S24e conserved site	-	NA	NA	K02974	small subunit ribosomal protein S24e
8146	COBS19008	5698.62	0.890908	0.275322	3.09061	0.00199744	0.0437248	UP	IPR012678	Ribosomal protein L23/L15e core domain superfamily	GO:0003735|GO:0005840|GO:0006412	NA	NA	K02974	small subunit ribosomal protein S24e
2173	COBS05313	6104.2	0.888685	0.327907	3.37797	0.000730228	0.0226972	UP	-	-		PTHR12563:SF21	BCDNA.GH07066	K00629	glycerol-3-phosphate O-acyltransferase 1/2 [EC:2.3.1.15]
2174	COBS05313	6104.2	0.888685	0.327907	3.37797	0.000730228	0.0226972	UP	IPR041728	GPAT/DHAPAT, acyltransferase domain	-	NA	NA	K00629	glycerol-3-phosphate O-acyltransferase 1/2 [EC:2.3.1.15]
2175	COBS05313	6104.2	0.888685	0.327907	3.37797	0.000730228	0.0226972	UP	IPR022284	Glycerol-3-phosphate O-acyltransferase/Dihydroxyacetone phosphate acyltransferase	GO:0008374|GO:0044255	PTHR12563	GLYCEROL-3-PHOSPHATE ACYLTRANSFERASE	K00629	glycerol-3-phosphate O-acyltransferase 1/2 [EC:2.3.1.15]
2177	COBS05313	6104.2	0.888685	0.327907	3.37797	0.000730228	0.0226972	UP	IPR045520	GPAT/DHAPAT, C-terminal domain	-	NA	NA	K00629	glycerol-3-phosphate O-acyltransferase 1/2 [EC:2.3.1.15]
2181	COBS05313	6104.2	0.888685	0.327907	3.37797	0.000730228	0.0226972	UP	IPR002123	Phospholipid/glycerol acyltransferase	GO:0016746	NA	NA	K00629	glycerol-3-phosphate O-acyltransferase 1/2 [EC:2.3.1.15]
4067	COBS08573	7185.14	0.887583	0.238662	3.7904	0.000150405	0.00771782	UP	-	-		PTHR12370:SF3	PHOSPHOLIPASE B-LIKE 2-RELATED	NA	NA
4068	COBS08573	7185.14	0.887583	0.238662	3.7904	0.000150405	0.00771782	UP	IPR007000	Phospholipase B-like	GO:0004620	PTHR12370	PHOSPHOLIPASE B-RELATED	NA	NA
7428	COBS16365	2676.48	0.884584	0.307654	3.41787	0.000631122	0.0204019	UP	IPR023210	NADP-dependent oxidoreductase domain	-	NA	NA	NA	NA
7429	COBS16365	2676.48	0.884584	0.307654	3.41787	0.000631122	0.0204019	UP	IPR023210	NADP-dependent oxidoreductase domain	-	NA	NA	K00011	aldehyde reductase [EC:1.1.1.21]
7430	COBS16365	2676.48	0.884584	0.307654	3.41787	0.000631122	0.0204019	UP	IPR020471	Aldo-keto reductase	GO:0016491	NA	NA	K00002	alcohol dehydrogenase (NADP+) [EC:1.1.1.2]
7431	COBS16365	2676.48	0.884584	0.307654	3.41787	0.000631122	0.0204019	UP	IPR023210	NADP-dependent oxidoreductase domain	-	NA	NA	K00002	alcohol dehydrogenase (NADP+) [EC:1.1.1.2]
7433	COBS16365	2676.48	0.884584	0.307654	3.41787	0.000631122	0.0204019	UP	IPR018170	Aldo/keto reductase, conserved site	GO:0016491	NA	NA	K00011	aldehyde reductase [EC:1.1.1.21]
7435	COBS16365	2676.48	0.884584	0.307654	3.41787	0.000631122	0.0204019	UP	IPR036812	NADP-dependent oxidoreductase domain superfamily	-	NA	NA	K00011	aldehyde reductase [EC:1.1.1.21]
7436	COBS16365	2676.48	0.884584	0.307654	3.41787	0.000631122	0.0204019	UP	IPR036812	NADP-dependent oxidoreductase domain superfamily	-	NA	NA	K00002	alcohol dehydrogenase (NADP+) [EC:1.1.1.2]
7437	COBS16365	2676.48	0.884584	0.307654	3.41787	0.000631122	0.0204019	UP	IPR020471	Aldo-keto reductase	GO:0016491	NA	NA	K00011	aldehyde reductase [EC:1.1.1.21]
7440	COBS16365	2676.48	0.884584	0.307654	3.41787	0.000631122	0.0204019	UP	-	-		PTHR11732,PTHR11732:SF482	ALDO/KETO REDUCTASE,ZGC:56622	K00011	aldehyde reductase [EC:1.1.1.21]
7442	COBS16365	2676.48	0.884584	0.307654	3.41787	0.000631122	0.0204019	UP	IPR036812	NADP-dependent oxidoreductase domain superfamily	-	NA	NA	NA	NA
7445	COBS16365	2676.48	0.884584	0.307654	3.41787	0.000631122	0.0204019	UP	-	-		PTHR11732,PTHR11732:SF482	ALDO/KETO REDUCTASE,ZGC:56622	NA	NA
7446	COBS16365	2676.48	0.884584	0.307654	3.41787	0.000631122	0.0204019	UP	IPR020471	Aldo-keto reductase	GO:0016491	NA	NA	NA	NA
7447	COBS16365	2676.48	0.884584	0.307654	3.41787	0.000631122	0.0204019	UP	IPR018170	Aldo/keto reductase, conserved site	GO:0016491	NA	NA	K00002	alcohol dehydrogenase (NADP+) [EC:1.1.1.2]
7450	COBS16365	2676.48	0.884584	0.307654	3.41787	0.000631122	0.0204019	UP	-	-		PTHR11732,PTHR11732:SF482	ALDO/KETO REDUCTASE,ZGC:56622	K00002	alcohol dehydrogenase (NADP+) [EC:1.1.1.2]
7451	COBS16365	2676.48	0.884584	0.307654	3.41787	0.000631122	0.0204019	UP	IPR018170	Aldo/keto reductase, conserved site	GO:0016491	NA	NA	NA	NA
7457	COBS16365	2676.48	0.884584	0.307654	3.41787	0.000631122	0.0204019	UP	-	-		PTHR11732:SF482,PTHR11732	ZGC:56622,ALDO/KETO REDUCTASE	NA	NA
5475	COBS11268	2902.3	0.881619	0.281861	3.45038	0.000559791	0.0186351	UP	IPR016163	Aldehyde dehydrogenase, C-terminal	GO:0016620	NA	NA	K07249	retinal dehydrogenase [EC:1.2.1.36]
5476	COBS11268	2902.3	0.881619	0.281861	3.45038	0.000559791	0.0186351	UP	-	-		PTHR11699,PTHR11699:SF274	ALDEHYDE DEHYDROGENASE-RELATED,DEHYDROGENASE, PUTATIVE-RELATED	K07249	retinal dehydrogenase [EC:1.2.1.36]
5477	COBS11268	2902.3	0.881619	0.281861	3.45038	0.000559791	0.0186351	UP	IPR029510	Aldehyde dehydrogenase, glutamic acid active site	GO:0016491	NA	NA	K07249	retinal dehydrogenase [EC:1.2.1.36]
5478	COBS11268	2902.3	0.881619	0.281861	3.45038	0.000559791	0.0186351	UP	IPR016160	Aldehyde dehydrogenase, cysteine active site	GO:0016491	NA	NA	K07249	retinal dehydrogenase [EC:1.2.1.36]
5479	COBS11268	2902.3	0.881619	0.281861	3.45038	0.000559791	0.0186351	UP	IPR016163	Aldehyde dehydrogenase, C-terminal	GO:0016620	NA	NA	K00128	aldehyde dehydrogenase (NAD+) [EC:1.2.1.3]
5480	COBS11268	2902.3	0.881619	0.281861	3.45038	0.000559791	0.0186351	UP	IPR016161	Aldehyde/histidinol dehydrogenase	GO:0016491	NA	NA	K00128	aldehyde dehydrogenase (NAD+) [EC:1.2.1.3]
5481	COBS11268	2902.3	0.881619	0.281861	3.45038	0.000559791	0.0186351	UP	IPR016162	Aldehyde dehydrogenase, N-terminal	GO:0016491	NA	NA	K07249	retinal dehydrogenase [EC:1.2.1.36]
5482	COBS11268	2902.3	0.881619	0.281861	3.45038	0.000559791	0.0186351	UP	IPR015590	Aldehyde dehydrogenase domain	GO:0016491	NA	NA	K00128	aldehyde dehydrogenase (NAD+) [EC:1.2.1.3]
5483	COBS11268	2902.3	0.881619	0.281861	3.45038	0.000559791	0.0186351	UP	IPR029510	Aldehyde dehydrogenase, glutamic acid active site	GO:0016491	NA	NA	K00128	aldehyde dehydrogenase (NAD+) [EC:1.2.1.3]
5484	COBS11268	2902.3	0.881619	0.281861	3.45038	0.000559791	0.0186351	UP	IPR016161	Aldehyde/histidinol dehydrogenase	GO:0016491	NA	NA	K07249	retinal dehydrogenase [EC:1.2.1.36]
5485	COBS11268	2902.3	0.881619	0.281861	3.45038	0.000559791	0.0186351	UP	IPR016162	Aldehyde dehydrogenase, N-terminal	GO:0016491	NA	NA	K00128	aldehyde dehydrogenase (NAD+) [EC:1.2.1.3]
5486	COBS11268	2902.3	0.881619	0.281861	3.45038	0.000559791	0.0186351	UP	IPR016160	Aldehyde dehydrogenase, cysteine active site	GO:0016491	NA	NA	K00128	aldehyde dehydrogenase (NAD+) [EC:1.2.1.3]
5487	COBS11268	2902.3	0.881619	0.281861	3.45038	0.000559791	0.0186351	UP	IPR015590	Aldehyde dehydrogenase domain	GO:0016491	NA	NA	K07249	retinal dehydrogenase [EC:1.2.1.36]
5488	COBS11268	2902.3	0.881619	0.281861	3.45038	0.000559791	0.0186351	UP	-	-		PTHR11699,PTHR11699:SF274	ALDEHYDE DEHYDROGENASE-RELATED,DEHYDROGENASE, PUTATIVE-RELATED	K00128	aldehyde dehydrogenase (NAD+) [EC:1.2.1.3]
3255	COBS06774	1588.44	0.877797	0.252274	3.55466	0.000378473	0.0144782	UP	IPR018252	Annexin repeat, conserved site	GO:0005509|GO:0005544	NA	NA	K17095	annexin A7/11
3256	COBS06774	1588.44	0.877797	0.252274	3.55466	0.000378473	0.0144782	UP	IPR018502	Annexin repeat	GO:0005509|GO:0005544	NA	NA	K17095	annexin A7/11
3257	COBS06774	1588.44	0.877797	0.252274	3.55466	0.000378473	0.0144782	UP	-	-		PTHR10502:SF226,PTHR10502	ANNEXIN,ANNEXIN	K17095	annexin A7/11
3258	COBS06774	1588.44	0.877797	0.252274	3.55466	0.000378473	0.0144782	UP	IPR001464	Annexin	GO:0005509|GO:0005544	NA	NA	K17095	annexin A7/11
3259	COBS06774	1588.44	0.877797	0.252274	3.55466	0.000378473	0.0144782	UP	IPR037104	Annexin superfamily	GO:0005509|GO:0005544	NA	NA	K17095	annexin A7/11
3263	COBS06774	1588.44	0.877797	0.252274	3.55466	0.000378473	0.0144782	UP	-	-		PTHR10502,PTHR10502:SF226	ANNEXIN,ANNEXIN	K17095	annexin A7/11
3264	COBS06774	1588.44	0.877797	0.252274	3.55466	0.000378473	0.0144782	UP	IPR009115	Annexin A8	GO:0005509|GO:0005544	NA	NA	K17095	annexin A7/11
7992	COBS18673	3235.06	0.877204	0.279043	3.14267	0.00167416	0.0393301	UP	IPR025605	OST-HTH/LOTUS domain	-	NA	NA	K18405	tudor domain-containing protein 1/4/6/7
7993	COBS18673	3235.06	0.877204	0.279043	3.14267	0.00167416	0.0393301	UP	IPR035437	SNase-like, OB-fold superfamily	-	NA	NA	K18405	tudor domain-containing protein 1/4/6/7
7994	COBS18673	3235.06	0.877204	0.279043	3.14267	0.00167416	0.0393301	UP	IPR041966	LOTUS-like domain	-	NA	NA	K18405	tudor domain-containing protein 1/4/6/7
7995	COBS18673	3235.06	0.877204	0.279043	3.14267	0.00167416	0.0393301	UP	-	-		PTHR22948,PTHR22948:SF14	TUDOR DOMAIN CONTAINING PROTEIN,TUDOR DOMAIN-CONTAINING PROTEIN 7	K18405	tudor domain-containing protein 1/4/6/7
7996	COBS18673	3235.06	0.877204	0.279043	3.14267	0.00167416	0.0393301	UP	IPR002999	Tudor domain	-	NA	NA	K18405	tudor domain-containing protein 1/4/6/7
5753	COBS12026	2364.48	0.876437	0.226866	3.82709	0.000129668	0.00691189	UP	IPR004240	Nonaspanin (TM9SF)	GO:0016021	PTHR10766	TRANSMEMBRANE 9 SUPERFAMILY PROTEIN	K17087	transmembrane 9 superfamily member 3
5755	COBS12026	2364.48	0.876437	0.226866	3.82709	0.000129668	0.00691189	UP	-	-		PTHR10766:SF117	TRANSMEMBRANE 9 SUPERFAMILY MEMBER	K17087	transmembrane 9 superfamily member 3
5756	COBS12026	2364.48	0.876437	0.226866	3.82709	0.000129668	0.00691189	UP	-	-		PTHR10766:SF41	TRANSMEMBRANE 9 SUPERFAMILY MEMBER 3	K17087	transmembrane 9 superfamily member 3
5703	COBS11702	18554.9	0.873918	0.256635	3.56164	0.000368545	0.0143083	UP	IPR014001	Helicase superfamily 1/2, ATP-binding domain	-	NA	NA	K03257	translation initiation factor 4A
5704	COBS11702	18554.9	0.873918	0.256635	3.56164	0.000368545	0.0143083	UP	-	-		PTHR24031,PTHR24031:SF720	RNA HELICASE,EUKARYOTIC INITIATION FACTOR 4A-II	K03257	translation initiation factor 4A
5705	COBS11702	18554.9	0.873918	0.256635	3.56164	0.000368545	0.0143083	UP	IPR000629	ATP-dependent RNA helicase DEAD-box, conserved site	-	NA	NA	K03257	translation initiation factor 4A
5706	COBS11702	18554.9	0.873918	0.256635	3.56164	0.000368545	0.0143083	UP	IPR001650	Helicase, C-terminal	-	NA	NA	K03257	translation initiation factor 4A
5707	COBS11702	18554.9	0.873918	0.256635	3.56164	0.000368545	0.0143083	UP	IPR014014	RNA helicase, DEAD-box type, Q motif	GO:0003724	NA	NA	K03257	translation initiation factor 4A
5708	COBS11702	18554.9	0.873918	0.256635	3.56164	0.000368545	0.0143083	UP	IPR027417	P-loop containing nucleoside triphosphate hydrolase	-	NA	NA	K03257	translation initiation factor 4A
5709	COBS11702	18554.9	0.873918	0.256635	3.56164	0.000368545	0.0143083	UP	IPR011545	DEAD/DEAH box helicase domain	GO:0003676|GO:0005524	NA	NA	K03257	translation initiation factor 4A
5712	COBS11702	18554.9	0.873918	0.256635	3.56164	0.000368545	0.0143083	UP	IPR044728	ATP-dependent RNA helicase eIF4A, DEAD-box helicase domain	GO:0005524	NA	NA	K03257	translation initiation factor 4A
5718	COBS11702	18554.9	0.873918	0.256635	3.56164	0.000368545	0.0143083	UP	-	-		PTHR24031:SF720,PTHR24031	EUKARYOTIC INITIATION FACTOR 4A-II,RNA HELICASE	K03257	translation initiation factor 4A
2674	COBS05741	2956.48	0.872781	0.343768	3.15665	0.00159595	0.0380982	UP	IPR037519	LITAF domain containing protein	-	PTHR23292	LIPOPOLYSACCHARIDE-INDUCED TUMOR NECROSIS FACTOR-ALPHA FACTOR	K19363	lipopolysaccharide-induced tumor necrosis factor-alpha factor
2675	COBS05741	2956.48	0.872781	0.343768	3.15665	0.00159595	0.0380982	UP	-	-		PTHR23292:SF14	FI16615P1-RELATED	K19363	lipopolysaccharide-induced tumor necrosis factor-alpha factor
2676	COBS05741	2956.48	0.872781	0.343768	3.15665	0.00159595	0.0380982	UP	IPR006629	LPS-induced tumour necrosis factor alpha factor	-	NA	NA	K19363	lipopolysaccharide-induced tumor necrosis factor-alpha factor
7889	COBS18640	406.762	0.869742	0.249205	3.07172	0.00212826	0.0456774	UP	IPR008092	Ribosomal protein S29, mitochondrial	GO:0005761|GO:0006915|GO:0015935	NA	NA	K17408	small subunit ribosomal protein S29
7890	COBS18640	406.762	0.869742	0.249205	3.07172	0.00212826	0.0456774	UP	IPR019368	Ribosomal protein S23/S29, mitochondrial	-	PTHR12810	MITOCHONDRIAL 28S RIBOSOMAL PROTEIN S29	K17408	small subunit ribosomal protein S29
37	COBS00169	872.096	0.86938	0.284357	3.44876	0.000563163	0.0186679	UP	IPR020846	Major facilitator superfamily domain	GO:0022857	NA	NA	K05820	MFS transporter, PPP family, 3-phenylpropionic acid transporter
38	COBS00169	872.096	0.86938	0.284357	3.44876	0.000563163	0.0186679	UP	IPR024989	Major facilitator superfamily associated domain	-	NA	NA	NA	NA
39	COBS00169	872.096	0.86938	0.284357	3.44876	0.000563163	0.0186679	UP	IPR036259	MFS transporter superfamily	-	NA	NA	K05820	MFS transporter, PPP family, 3-phenylpropionic acid transporter
40	COBS00169	872.096	0.86938	0.284357	3.44876	0.000563163	0.0186679	UP	-	-		PTHR16172,PTHR16172:SF37	UNCHARACTERIZED,RE36877P	K05820	MFS transporter, PPP family, 3-phenylpropionic acid transporter
41	COBS00169	872.096	0.86938	0.284357	3.44876	0.000563163	0.0186679	UP	IPR024989	Major facilitator superfamily associated domain	-	NA	NA	K05820	MFS transporter, PPP family, 3-phenylpropionic acid transporter
43	COBS00169	872.096	0.86938	0.284357	3.44876	0.000563163	0.0186679	UP	IPR036259	MFS transporter superfamily	-	NA	NA	NA	NA
46	COBS00169	872.096	0.86938	0.284357	3.44876	0.000563163	0.0186679	UP	-	-		PTHR16172:SF37,PTHR16172	RE36877P,UNCHARACTERIZED	K05820	MFS transporter, PPP family, 3-phenylpropionic acid transporter
47	COBS00169	872.096	0.86938	0.284357	3.44876	0.000563163	0.0186679	UP	-	-		PTHR16172:SF37,PTHR16172	RE36877P,UNCHARACTERIZED	NA	NA
5798	COBS12246	535.3	0.866056	0.2763	3.30995	0.000933123	0.0265448	UP	IPR038765	Papain-like cysteine peptidase superfamily	-	NA	NA	K11851	ubiquitin carboxyl-terminal hydrolase 30 [EC:3.4.19.12]
5799	COBS12246	535.3	0.866056	0.2763	3.30995	0.000933123	0.0265448	UP	-	-		PTHR21646	UBIQUITIN CARBOXYL-TERMINAL HYDROLASE	K11851	ubiquitin carboxyl-terminal hydrolase 30 [EC:3.4.19.12]
5800	COBS12246	535.3	0.866056	0.2763	3.30995	0.000933123	0.0265448	UP	IPR018200	Ubiquitin specific protease, conserved site	GO:0004843|GO:0006511	NA	NA	K11851	ubiquitin carboxyl-terminal hydrolase 30 [EC:3.4.19.12]
5804	COBS12246	535.3	0.866056	0.2763	3.30995	0.000933123	0.0265448	UP	IPR028889	Ubiquitin specific protease domain	-	NA	NA	K11851	ubiquitin carboxyl-terminal hydrolase 30 [EC:3.4.19.12]
5805	COBS12246	535.3	0.866056	0.2763	3.30995	0.000933123	0.0265448	UP	IPR001394	Peptidase C19, ubiquitin carboxyl-terminal hydrolase	GO:0004843|GO:0016579	NA	NA	K11851	ubiquitin carboxyl-terminal hydrolase 30 [EC:3.4.19.12]
566	COBS01446	1748.87	0.861753	0.181037	4.79928	1.59e-06	0.000214782	UP	IPR004911	Gamma interferon inducible lysosomal thiol reductase GILT	GO:0016671	PTHR13234	GAMMA-INTERFERON INDUCIBLE LYSOSOMAL THIOL REDUCTASE GILT	K08059	interferon, gamma-inducible protein 30
567	COBS01446	1748.87	0.861753	0.181037	4.79928	1.59e-06	0.000214782	UP	IPR036249	Thioredoxin-like superfamily	-	NA	NA	K08059	interferon, gamma-inducible protein 30
568	COBS01446	1748.87	0.861753	0.181037	4.79928	1.59e-06	0.000214782	UP	-	-		PTHR13234:SF59	GAMMA-INTERFERON-INDUCIBLE LYSOSOMAL THIOL REDUCTASE-LIKE PROTEIN	K08059	interferon, gamma-inducible protein 30
2062	COBS04746	1326.32	0.850505	0.2564	3.4475	0.000565806	0.0187159	UP	IPR004254	AdipoR/Haemolysin-III-related	GO:0016021	PTHR20855	ADIPOR/PROGESTIN RECEPTOR-RELATED	K07297	adiponectin receptor
2063	COBS04746	1326.32	0.850505	0.2564	3.4475	0.000565806	0.0187159	UP	-	-		PTHR20855:SF33	ADIPONECTIN RECEPTOR PROTEIN 2	K07297	adiponectin receptor
3046	COBS06453	2341.52	0.849613	0.269803	3.10191	0.00192277	0.0428543	UP	-	-		PTHR45715:SF3	ATPASE H+-TRANSPORTING V1 SUBUNIT E1A-RELATED	K02150	V-type H+-transporting ATPase subunit E
3047	COBS06453	2341.52	0.849613	0.269803	3.10191	0.00192277	0.0428543	UP	IPR038495	V-type ATPase subunit E, C-terminal domain superfamily	-	NA	NA	K02150	V-type H+-transporting ATPase subunit E
3048	COBS06453	2341.52	0.849613	0.269803	3.10191	0.00192277	0.0428543	UP	IPR002842	V-type ATPase subunit E	GO:0033178|GO:0046961|GO:1902600	PTHR45715	ATPASE H+-TRANSPORTING V1 SUBUNIT E1A-RELATED	K02150	V-type H+-transporting ATPase subunit E
3657	COBS07910	2788.92	0.849491	0.259172	3.66942	0.000243102	0.0106577	UP	IPR020785	Ribosomal protein L11, conserved site	GO:0003735|GO:0005840|GO:0006412	NA	NA	K02870	large subunit ribosomal protein L12e
3658	COBS07910	2788.92	0.849491	0.259172	3.66942	0.000243102	0.0106577	UP	IPR036769	Ribosomal protein L11, C-terminal domain superfamily	-	NA	NA	K02870	large subunit ribosomal protein L12e
3659	COBS07910	2788.92	0.849491	0.259172	3.66942	0.000243102	0.0106577	UP	-	-		PTHR11661:SF21	60S RIBOSOMAL PROTEIN L12	K02870	large subunit ribosomal protein L12e
3660	COBS07910	2788.92	0.849491	0.259172	3.66942	0.000243102	0.0106577	UP	IPR036796	Ribosomal protein L11/L12, N-terminal domain superfamily	-	NA	NA	K02870	large subunit ribosomal protein L12e
3661	COBS07910	2788.92	0.849491	0.259172	3.66942	0.000243102	0.0106577	UP	IPR000911	Ribosomal protein L11/L12	GO:0003735|GO:0005840|GO:0006412	PTHR11661	60S RIBOSOMAL PROTEIN L12	K02870	large subunit ribosomal protein L12e
3662	COBS07910	2788.92	0.849491	0.259172	3.66942	0.000243102	0.0106577	UP	IPR020784	Ribosomal protein L11, N-terminal	-	NA	NA	K02870	large subunit ribosomal protein L12e
3663	COBS07910	2788.92	0.849491	0.259172	3.66942	0.000243102	0.0106577	UP	IPR020783	Ribosomal protein L11, C-terminal	GO:0003735|GO:0005840|GO:0006412	NA	NA	K02870	large subunit ribosomal protein L12e
3939	COBS08288	329.399	0.847256	0.240908	3.25924	0.0011171	0.0299283	UP	IPR024156	Small GTPase superfamily, ARF type	GO:0005525	PTHR11711	ADP RIBOSYLATION FACTOR-RELATED	K07950	ADP-ribosylation factor-like protein 5B
3940	COBS08288	329.399	0.847256	0.240908	3.25924	0.0011171	0.0299283	UP	-	-		PTHR11711:SF147	ADP-RIBOSYLATION FACTOR-LIKE PROTEIN 5A	K07950	ADP-ribosylation factor-like protein 5B
3941	COBS08288	329.399	0.847256	0.240908	3.25924	0.0011171	0.0299283	UP	IPR027417	P-loop containing nucleoside triphosphate hydrolase	-	NA	NA	K07950	ADP-ribosylation factor-like protein 5B
3942	COBS08288	329.399	0.847256	0.240908	3.25924	0.0011171	0.0299283	UP	IPR006689	Small GTPase superfamily, ARF/SAR type	GO:0003924|GO:0005525	NA	NA	K07950	ADP-ribosylation factor-like protein 5B
3943	COBS08288	329.399	0.847256	0.240908	3.25924	0.0011171	0.0299283	UP	IPR005225	Small GTP-binding protein domain	GO:0005525	NA	NA	K07950	ADP-ribosylation factor-like protein 5B
823	COBS02374	2467.09	0.844364	0.255979	3.38854	0.000702651	0.0220756	UP	IPR011990	Tetratricopeptide-like helical domain superfamily	GO:0005515	NA	NA	K16365	small glutamine-rich tetratricopeptide repeat-containing protein alpha
824	COBS02374	2467.09	0.844364	0.255979	3.38854	0.000702651	0.0220756	UP	IPR032374	SGTA, homodimerisation domain	-	NA	NA	K16365	small glutamine-rich tetratricopeptide repeat-containing protein alpha
827	COBS02374	2467.09	0.844364	0.255979	3.38854	0.000702651	0.0220756	UP	-	-		PTHR45831:SF3,PTHR45831	SMALL GLUTAMINE-RICH TETRATRICOPEPTIDE REPEAT-CONTAINING PROTEIN ALPHA,LD24721P	K16365	small glutamine-rich tetratricopeptide repeat-containing protein alpha
829	COBS02374	2467.09	0.844364	0.255979	3.38854	0.000702651	0.0220756	UP	IPR019734	Tetratricopeptide repeat	GO:0005515	NA	NA	K16365	small glutamine-rich tetratricopeptide repeat-containing protein alpha
48	COBS00171	7869.36	0.842623	0.281863	3.21615	0.00129924	0.032893	UP	-	-		NA	NA	K01681	aconitate hydratase [EC:4.2.1.3]
49	COBS00171	7869.36	0.842623	0.281863	3.21615	0.00129924	0.032893	UP	IPR036008	Aconitase, iron-sulfur domain	-	NA	NA	K01681	aconitate hydratase [EC:4.2.1.3]
50	COBS00171	7869.36	0.842623	0.281863	3.21615	0.00129924	0.032893	UP	IPR029784	Iron regulatory protein 1	GO:0003994|GO:0006879|GO:0010040|GO:0051539	PTHR11670:SF32	CYTOPLASMIC ACONITATE HYDRATASE	K01681	aconitate hydratase [EC:4.2.1.3]
52	COBS00171	7869.36	0.842623	0.281863	3.21615	0.00129924	0.032893	UP	IPR001030	Aconitase/3-isopropylmalate dehydratase large subunit, alpha/beta/alpha domain	-	NA	NA	K01681	aconitate hydratase [EC:4.2.1.3]
54	COBS00171	7869.36	0.842623	0.281863	3.21615	0.00129924	0.032893	UP	IPR015931	Aconitase/3-isopropylmalate dehydratase large subunit, alpha/beta/alpha, subdomain 1/3	-	NA	NA	K01681	aconitate hydratase [EC:4.2.1.3]
55	COBS00171	7869.36	0.842623	0.281863	3.21615	0.00129924	0.032893	UP	IPR000573	Aconitase A/isopropylmalate dehydratase small subunit, swivel domain	-	NA	NA	K01681	aconitate hydratase [EC:4.2.1.3]
57	COBS00171	7869.36	0.842623	0.281863	3.21615	0.00129924	0.032893	UP	IPR015928	Aconitase/3-isopropylmalate dehydratase, swivel	-	NA	NA	K01681	aconitate hydratase [EC:4.2.1.3]
58	COBS00171	7869.36	0.842623	0.281863	3.21615	0.00129924	0.032893	UP	IPR006249	Aconitase/Iron-responsive element-binding protein 2	-	PTHR11670	ACONITASE/IRON-RESPONSIVE ELEMENT FAMILY MEMBER	K01681	aconitate hydratase [EC:4.2.1.3]
63	COBS00171	7869.36	0.842623	0.281863	3.21615	0.00129924	0.032893	UP	IPR018136	Aconitase family, 4Fe-4S cluster binding site	-	NA	NA	K01681	aconitate hydratase [EC:4.2.1.3]
66	COBS00171	7869.36	0.842623	0.281863	3.21615	0.00129924	0.032893	UP	IPR044137	Aconitase A, swivel domain	-	NA	NA	K01681	aconitate hydratase [EC:4.2.1.3]
2656	COBS05657	1323.06	0.837786	0.196164	4.53003	5.9e-06	0.000636363	UP	IPR013568	SEFIR domain	-	NA	NA	NA	NA
2657	COBS05657	1323.06	0.837786	0.196164	4.53003	5.9e-06	0.000636363	UP	-	-		NA	NA	NA	NA
7213	COBS15596	844.154	0.836484	0.277238	3.24472	0.00117564	0.0310223	UP	-	-		NA	NA	K03264	translation initiation factor 6
7214	COBS15596	844.154	0.836484	0.277238	3.24472	0.00117564	0.0310223	UP	IPR002769	Translation initiation factor IF6	GO:0042256|GO:0043022	PTHR10784	EUKARYOTIC TRANSLATION INITIATION FACTOR 6	K03264	translation initiation factor 6
5808	COBS12277	2262.88	0.83599	0.236444	3.40627	0.000658574	0.0209432	UP	IPR000163	Prohibitin	GO:0016020	PTHR23222	PROHIBITIN	K17081	prohibitin 2
5809	COBS12277	2262.88	0.83599	0.236444	3.40627	0.000658574	0.0209432	UP	-	-		NA	NA	K17081	prohibitin 2
5810	COBS12277	2262.88	0.83599	0.236444	3.40627	0.000658574	0.0209432	UP	IPR001107	Band 7 domain	-	NA	NA	K17081	prohibitin 2
5811	COBS12277	2262.88	0.83599	0.236444	3.40627	0.000658574	0.0209432	UP	IPR036013	Band 7/SPFH domain superfamily	-	NA	NA	K17081	prohibitin 2
5814	COBS12277	2262.88	0.83599	0.236444	3.40627	0.000658574	0.0209432	UP	-	-		PTHR23222:SF1	PROHIBITIN-2	K17080	prohibitin 1
5818	COBS12277	2262.88	0.83599	0.236444	3.40627	0.000658574	0.0209432	UP	-	-		PTHR23222:SF1	PROHIBITIN-2	K17081	prohibitin 2
5819	COBS12277	2262.88	0.83599	0.236444	3.40627	0.000658574	0.0209432	UP	IPR000163	Prohibitin	GO:0016020	PTHR23222	PROHIBITIN	K17080	prohibitin 1
5820	COBS12277	2262.88	0.83599	0.236444	3.40627	0.000658574	0.0209432	UP	IPR036013	Band 7/SPFH domain superfamily	-	NA	NA	K17080	prohibitin 1
5828	COBS12277	2262.88	0.83599	0.236444	3.40627	0.000658574	0.0209432	UP	IPR001107	Band 7 domain	-	NA	NA	K17080	prohibitin 1
809	COBS02344	800.628	0.834731	0.23194	3.8562	0.000115162	0.00645814	UP	IPR015943	WD40/YVTN repeat-like-containing domain superfamily	GO:0005515	NA	NA	NA	NA
810	COBS02344	800.628	0.834731	0.23194	3.8562	0.000115162	0.00645814	UP	IPR042410	Transducin beta-like protein 2	-	PTHR44321	TRANSDUCIN BETA-LIKE PROTEIN 2	K23325	transducin beta-like protein 2
811	COBS02344	800.628	0.834731	0.23194	3.8562	0.000115162	0.00645814	UP	-	-		NA	NA	K23325	transducin beta-like protein 2
812	COBS02344	800.628	0.834731	0.23194	3.8562	0.000115162	0.00645814	UP	IPR036322	WD40-repeat-containing domain superfamily	GO:0005515	NA	NA	NA	NA
813	COBS02344	800.628	0.834731	0.23194	3.8562	0.000115162	0.00645814	UP	IPR042410	Transducin beta-like protein 2	-	PTHR44321	TRANSDUCIN BETA-LIKE PROTEIN 2	NA	NA
814	COBS02344	800.628	0.834731	0.23194	3.8562	0.000115162	0.00645814	UP	IPR036322	WD40-repeat-containing domain superfamily	GO:0005515	NA	NA	K23325	transducin beta-like protein 2
815	COBS02344	800.628	0.834731	0.23194	3.8562	0.000115162	0.00645814	UP	IPR001680	WD40 repeat	GO:0005515	NA	NA	K23325	transducin beta-like protein 2
816	COBS02344	800.628	0.834731	0.23194	3.8562	0.000115162	0.00645814	UP	-	-		NA	NA	NA	NA
819	COBS02344	800.628	0.834731	0.23194	3.8562	0.000115162	0.00645814	UP	IPR015943	WD40/YVTN repeat-like-containing domain superfamily	GO:0005515	NA	NA	K23325	transducin beta-like protein 2
2820	COBS06108	5878.92	0.832099	0.199174	4.3026	1.69e-05	0.00139007	UP	IPR008991	Translation protein SH3-like domain superfamily	-	NA	NA	K02934	large subunit ribosomal protein L6e
2821	COBS06108	5878.92	0.832099	0.199174	4.3026	1.69e-05	0.00139007	UP	IPR000915	60S ribosomal protein L6E	GO:0003735|GO:0005840|GO:0006412	PTHR10715	60S RIBOSOMAL PROTEIN L6	K02934	large subunit ribosomal protein L6e
2822	COBS06108	5878.92	0.832099	0.199174	4.3026	1.69e-05	0.00139007	UP	IPR014722	Ribosomal protein L2, domain 2	-	NA	NA	K02934	large subunit ribosomal protein L6e
2823	COBS06108	5878.92	0.832099	0.199174	4.3026	1.69e-05	0.00139007	UP	IPR041997	Ribosomal Protein L6, KOW domain	-	NA	NA	K02934	large subunit ribosomal protein L6e
2824	COBS06108	5878.92	0.832099	0.199174	4.3026	1.69e-05	0.00139007	UP	IPR005568	Ribosomal protein L6, N-terminal	GO:0003735|GO:0005840|GO:0006412	NA	NA	K02934	large subunit ribosomal protein L6e
2825	COBS06108	5878.92	0.832099	0.199174	4.3026	1.69e-05	0.00139007	UP	-	-		PTHR10715:SF0	60S RIBOSOMAL PROTEIN L6	K02934	large subunit ribosomal protein L6e
1030	COBS02855	3149.16	0.831084	0.240796	3.58181	0.000341223	0.0136193	UP	IPR009832	Protein of unknown function DUF1397	-	PTHR20997	UNCHARACTERIZED	NA	NA
1032	COBS02855	3149.16	0.831084	0.240796	3.58181	0.000341223	0.0136193	UP	-	-		NA	NA	NA	NA
2699	COBS05880	1113.22	0.827384	0.182819	4.17245	3.01e-05	0.00229993	UP	IPR013083	Zinc finger, RING/FYVE/PHD-type	-	NA	NA	K10666	E3 ubiquitin-protein ligase RNF5 [EC:2.3.2.27]
2700	COBS05880	1113.22	0.827384	0.182819	4.17245	3.01e-05	0.00229993	UP	IPR017907	Zinc finger, RING-type, conserved site	-	NA	NA	K10666	E3 ubiquitin-protein ligase RNF5 [EC:2.3.2.27]
2701	COBS05880	1113.22	0.827384	0.182819	4.17245	3.01e-05	0.00229993	UP	IPR001841	Zinc finger, RING-type	-	NA	NA	K10666	E3 ubiquitin-protein ligase RNF5 [EC:2.3.2.27]
2702	COBS05880	1113.22	0.827384	0.182819	4.17245	3.01e-05	0.00229993	UP	-	-		PTHR12313:SF13	E3 UBIQUITIN-PROTEIN LIGASE RNF185	K10666	E3 ubiquitin-protein ligase RNF5 [EC:2.3.2.27]
2703	COBS05880	1113.22	0.827384	0.182819	4.17245	3.01e-05	0.00229993	UP	IPR045103	E3 ubiquitin-protein ligase RNF5/RNF185-like	GO:0005783|GO:0006511|GO:0061630	PTHR12313	E3 UBIQUITIN-PROTEIN LIGASE RNF5-RELATED	K10666	E3 ubiquitin-protein ligase RNF5 [EC:2.3.2.27]
7859	COBS18378	8069.18	0.826565	0.257388	3.32568	0.00088204	0.0257983	UP	IPR029045	ClpP/crotonase-like domain superfamily	-	NA	NA	K07515	enoyl-CoA hydratase / long-chain 3-hydroxyacyl-CoA dehydrogenase [EC:4.2.1.17 1.1.1.211]
7860	COBS18378	8069.18	0.826565	0.257388	3.32568	0.00088204	0.0257983	UP	IPR036291	NAD(P)-binding domain superfamily	-	NA	NA	K07515	enoyl-CoA hydratase / long-chain 3-hydroxyacyl-CoA dehydrogenase [EC:4.2.1.17 1.1.1.211]
7861	COBS18378	8069.18	0.826565	0.257388	3.32568	0.00088204	0.0257983	UP	IPR008927	6-phosphogluconate dehydrogenase-like, C-terminal domain superfamily	-	NA	NA	K07515	enoyl-CoA hydratase / long-chain 3-hydroxyacyl-CoA dehydrogenase [EC:4.2.1.17 1.1.1.211]
7862	COBS18378	8069.18	0.826565	0.257388	3.32568	0.00088204	0.0257983	UP	IPR001753	Enoyl-CoA hydratase/isomerase	GO:0003824	NA	NA	K07515	enoyl-CoA hydratase / long-chain 3-hydroxyacyl-CoA dehydrogenase [EC:4.2.1.17 1.1.1.211]
7863	COBS18378	8069.18	0.826565	0.257388	3.32568	0.00088204	0.0257983	UP	IPR006176	3-hydroxyacyl-CoA dehydrogenase, NAD binding	GO:0006631|GO:0070403	NA	NA	K07515	enoyl-CoA hydratase / long-chain 3-hydroxyacyl-CoA dehydrogenase [EC:4.2.1.17 1.1.1.211]
7864	COBS18378	8069.18	0.826565	0.257388	3.32568	0.00088204	0.0257983	UP	IPR012803	Fatty acid oxidation complex, alpha subunit, mitochondrial	GO:0003857|GO:0004300|GO:0005739|GO:0006635|GO:0016507	NA	NA	K07515	enoyl-CoA hydratase / long-chain 3-hydroxyacyl-CoA dehydrogenase [EC:4.2.1.17 1.1.1.211]
7865	COBS18378	8069.18	0.826565	0.257388	3.32568	0.00088204	0.0257983	UP	-	-		PTHR43612	TRIFUNCTIONAL ENZYME SUBUNIT ALPHA	K07515	enoyl-CoA hydratase / long-chain 3-hydroxyacyl-CoA dehydrogenase [EC:4.2.1.17 1.1.1.211]
7866	COBS18378	8069.18	0.826565	0.257388	3.32568	0.00088204	0.0257983	UP	IPR018376	Enoyl-CoA hydratase/isomerase, conserved site	GO:0003824	NA	NA	K07515	enoyl-CoA hydratase / long-chain 3-hydroxyacyl-CoA dehydrogenase [EC:4.2.1.17 1.1.1.211]
7867	COBS18378	8069.18	0.826565	0.257388	3.32568	0.00088204	0.0257983	UP	IPR006108	3-hydroxyacyl-CoA dehydrogenase, C-terminal	GO:0006631|GO:0016491|GO:0016616	NA	NA	K07515	enoyl-CoA hydratase / long-chain 3-hydroxyacyl-CoA dehydrogenase [EC:4.2.1.17 1.1.1.211]
494	COBS01405	2191.48	0.825204	0.224428	3.62304	0.000291159	0.0121733	UP	IPR001478	PDZ domain	GO:0005515	NA	NA	K25638	rhophilin-1
495	COBS01405	2191.48	0.825204	0.224428	3.62304	0.000291159	0.0121733	UP	IPR036274	HR1 repeat superfamily	-	NA	NA	K25638	rhophilin-1
496	COBS01405	2191.48	0.825204	0.224428	3.62304	0.000291159	0.0121733	UP	IPR001478	PDZ domain	GO:0005515	NA	NA	NA	NA
498	COBS01405	2191.48	0.825204	0.224428	3.62304	0.000291159	0.0121733	UP	IPR011072	HR1 rho-binding domain	GO:0007165	NA	NA	NA	NA
499	COBS01405	2191.48	0.825204	0.224428	3.62304	0.000291159	0.0121733	UP	IPR036034	PDZ superfamily	GO:0005515	NA	NA	K25638	rhophilin-1
502	COBS01405	2191.48	0.825204	0.224428	3.62304	0.000291159	0.0121733	UP	IPR038499	BRO1 domain superfamily	-	NA	NA	K25638	rhophilin-1
505	COBS01405	2191.48	0.825204	0.224428	3.62304	0.000291159	0.0121733	UP	IPR011072	HR1 rho-binding domain	GO:0007165	NA	NA	K25638	rhophilin-1
506	COBS01405	2191.48	0.825204	0.224428	3.62304	0.000291159	0.0121733	UP	-	-		PTHR23031	RHOPHILIN	K25638	rhophilin-1
508	COBS01405	2191.48	0.825204	0.224428	3.62304	0.000291159	0.0121733	UP	IPR036034	PDZ superfamily	GO:0005515	NA	NA	NA	NA
509	COBS01405	2191.48	0.825204	0.224428	3.62304	0.000291159	0.0121733	UP	-	-		PTHR23031,PTHR23031:SF15	RHOPHILIN,LD12055P	NA	NA
513	COBS01405	2191.48	0.825204	0.224428	3.62304	0.000291159	0.0121733	UP	IPR004328	BRO1 domain	-	NA	NA	K25638	rhophilin-1
519	COBS01405	2191.48	0.825204	0.224428	3.62304	0.000291159	0.0121733	UP	IPR036274	HR1 repeat superfamily	-	NA	NA	NA	NA
526	COBS01405	2191.48	0.825204	0.224428	3.62304	0.000291159	0.0121733	UP	IPR038499	BRO1 domain superfamily	-	NA	NA	NA	NA
528	COBS01405	2191.48	0.825204	0.224428	3.62304	0.000291159	0.0121733	UP	IPR004328	BRO1 domain	-	NA	NA	NA	NA
529	COBS01405	2191.48	0.825204	0.224428	3.62304	0.000291159	0.0121733	UP	-	-		PTHR23031	RHOPHILIN	NA	NA
5888	COBS12523	1984.48	0.820919	0.248258	3.48865	0.000485475	0.0168794	UP	-	-		PTHR12701:SF50	LP10861P	K14009	B-cell receptor-associated protein 31
5889	COBS12523	1984.48	0.820919	0.248258	3.48865	0.000485475	0.0168794	UP	IPR008417	B-cell receptor-associated protein 29/31	GO:0005783|GO:0006886|GO:0016021	PTHR12701	BCR-ASSOCIATED PROTEIN, BAP	K14009	B-cell receptor-associated protein 31
5890	COBS12523	1984.48	0.820919	0.248258	3.48865	0.000485475	0.0168794	UP	IPR040463	BAP29/BAP31, transmembrane domain	-	NA	NA	K14009	B-cell receptor-associated protein 31
5891	COBS12523	1984.48	0.820919	0.248258	3.48865	0.000485475	0.0168794	UP	IPR041672	Bap31/Bap29 cytoplasmic coiled-coil domain	-	NA	NA	K14009	B-cell receptor-associated protein 31
6988	COBS15367	581.959	0.819101	0.222739	3.2698	0.00107625	0.029232	UP	-	-		NA	NA	NA	NA
5514	COBS11428	600.497	0.812754	0.255193	3.12687	0.0017668	0.0407719	UP	IPR039868	Armadillo-like helical domain-containing protein 3-like	-	PTHR13608	UNCHARACTERIZED	NA	NA
5517	COBS11428	600.497	0.812754	0.255193	3.12687	0.0017668	0.0407719	UP	IPR013636	Armadillo-like helical domain-containing protein 3, C-terminal	-	NA	NA	NA	NA
7350	COBS16050	1984.63	0.811186	0.339184	3.31129	0.000928655	0.0265447	UP	IPR015876	Acyl-CoA desaturase	GO:0016717	PTHR11351	ACYL-COA DESATURASE	K00507	stearoyl-CoA desaturase (Delta-9 desaturase) [EC:1.14.19.1]
7351	COBS16050	1984.63	0.811186	0.339184	3.31129	0.000928655	0.0265447	UP	IPR005804	Fatty acid desaturase domain	GO:0006629	NA	NA	K00507	stearoyl-CoA desaturase (Delta-9 desaturase) [EC:1.14.19.1]
7352	COBS16050	1984.63	0.811186	0.339184	3.31129	0.000928655	0.0265447	UP	IPR001522	Fatty acid desaturase type 1, conserved site	-	NA	NA	K00507	stearoyl-CoA desaturase (Delta-9 desaturase) [EC:1.14.19.1]
7354	COBS16050	1984.63	0.811186	0.339184	3.31129	0.000928655	0.0265447	UP	-	-		PTHR11351:SF61	RH14937P	K00507	stearoyl-CoA desaturase (Delta-9 desaturase) [EC:1.14.19.1]
6447	COBS15046	205.447	0.809796	0.257603	3.38128	0.000721488	0.0225318	UP	IPR027514	Methylthioribulose-1-phosphate dehydratase, eukaryotes	GO:0005737|GO:0019509|GO:0046872	NA	NA	K08964	methylthioribulose-1-phosphate dehydratase [EC:4.2.1.109]
6448	COBS15046	205.447	0.809796	0.257603	3.38128	0.000721488	0.0225318	UP	IPR017714	Methylthioribulose-1-phosphate dehydratase	GO:0005737|GO:0019509|GO:0046872	PTHR10640	METHYLTHIORIBULOSE-1-PHOSPHATE DEHYDRATASE	K08964	methylthioribulose-1-phosphate dehydratase [EC:4.2.1.109]
6449	COBS15046	205.447	0.809796	0.257603	3.38128	0.000721488	0.0225318	UP	IPR001303	Class II aldolase/adducin N-terminal	-	NA	NA	K08964	methylthioribulose-1-phosphate dehydratase [EC:4.2.1.109]
6450	COBS15046	205.447	0.809796	0.257603	3.38128	0.000721488	0.0225318	UP	IPR036409	Class II aldolase/adducin N-terminal domain superfamily	-	NA	NA	K08964	methylthioribulose-1-phosphate dehydratase [EC:4.2.1.109]
8002	COBS18766	599.234	0.80924	0.161866	4.98458	6.21e-07	9.43e-05	UP	IPR036457	PPM-type phosphatase-like domain superfamily	-	NA	NA	K01102	pyruvate dehydrogenase phosphatase [EC:3.1.3.43]
8003	COBS18766	599.234	0.80924	0.161866	4.98458	6.21e-07	9.43e-05	UP	IPR015655	Protein phosphatase 2C family	GO:0004722|GO:0006470	PTHR13832	PROTEIN PHOSPHATASE 2C	K01102	pyruvate dehydrogenase phosphatase [EC:3.1.3.43]
8004	COBS18766	599.234	0.80924	0.161866	4.98458	6.21e-07	9.43e-05	UP	IPR001932	PPM-type phosphatase-like domain	-	NA	NA	K01102	pyruvate dehydrogenase phosphatase [EC:3.1.3.43]
8005	COBS18766	599.234	0.80924	0.161866	4.98458	6.21e-07	9.43e-05	UP	IPR000222	PPM-type phosphatase, divalent cation binding	GO:0043169	NA	NA	K01102	pyruvate dehydrogenase phosphatase [EC:3.1.3.43]
8006	COBS18766	599.234	0.80924	0.161866	4.98458	6.21e-07	9.43e-05	UP	-	-		PTHR13832:SF343	[PYRUVATE DEHYDROGENASE [ACETYL-TRANSFERRING]]-PHOSPHATASE 2, MITOCHONDRIAL	K01102	pyruvate dehydrogenase phosphatase [EC:3.1.3.43]
6007	COBS12980	856.091	0.808613	0.169498	4.80241	1.57e-06	0.000213283	UP	-	-		NA	NA	K20362	protein transport protein YIF1
6008	COBS12980	856.091	0.808613	0.169498	4.80241	1.57e-06	0.000213283	UP	IPR005578	Yif1 family	GO:0005789|GO:0006888	PTHR14083	YIP1 INTERACTING FACTOR HOMOLOG YIF1 PROTEIN	K20362	protein transport protein YIF1
5601	COBS11539	6640.71	0.800473	0.302782	3.32736	0.00087672	0.0257983	UP	IPR000301	Tetraspanin, animals	GO:0016021	NA	NA	K06497	CD63 antigen
5602	COBS11539	6640.71	0.800473	0.302782	3.32736	0.00087672	0.0257983	UP	IPR018503	Tetraspanin, conserved site	GO:0016021	NA	NA	K06497	CD63 antigen
5603	COBS11539	6640.71	0.800473	0.302782	3.32736	0.00087672	0.0257983	UP	-	-		PTHR19282:SF28	TETRASPANIN	K06497	CD63 antigen
5604	COBS11539	6640.71	0.800473	0.302782	3.32736	0.00087672	0.0257983	UP	IPR008952	Tetraspanin, EC2 domain superfamily	GO:0016021	NA	NA	K06497	CD63 antigen
5605	COBS11539	6640.71	0.800473	0.302782	3.32736	0.00087672	0.0257983	UP	IPR018499	Tetraspanin/Peripherin	GO:0016021	PTHR19282	TETRASPANIN	K06497	CD63 antigen
768	COBS02029	2174.73	0.799301	0.271566	3.22331	0.0012672	0.0323435	UP	IPR011009	Protein kinase-like domain superfamily	-	NA	NA	K16288	dual serine/threonine and tyrosine protein kinase [EC:2.7.12.1]
769	COBS02029	2174.73	0.799301	0.271566	3.22331	0.0012672	0.0323435	UP	IPR008271	Serine/threonine-protein kinase, active site	GO:0004672|GO:0006468	NA	NA	K16288	dual serine/threonine and tyrosine protein kinase [EC:2.7.12.1]
770	COBS02029	2174.73	0.799301	0.271566	3.22331	0.0012672	0.0323435	UP	IPR000719	Protein kinase domain	GO:0004672|GO:0005524|GO:0006468	NA	NA	K16288	dual serine/threonine and tyrosine protein kinase [EC:2.7.12.1]
772	COBS02029	2174.73	0.799301	0.271566	3.22331	0.0012672	0.0323435	UP	-	-		PTHR46392	DUAL SERINE/THREONINE AND TYROSINE PROTEIN KINASE	K16288	dual serine/threonine and tyrosine protein kinase [EC:2.7.12.1]
774	COBS02029	2174.73	0.799301	0.271566	3.22331	0.0012672	0.0323435	UP	IPR017441	Protein kinase, ATP binding site	GO:0005524	NA	NA	K16288	dual serine/threonine and tyrosine protein kinase [EC:2.7.12.1]
7620	COBS17288	12.9516	0.794287	1.19376	7.05746	1.7e-12	5.39e-10	UP	IPR032071	Domain of unknown function DUF4806	-	NA	NA	NA	NA
1253	COBS03368	508.391	0.78791	0.261557	3.10708	0.00188946	0.0422926	UP	IPR005225	Small GTP-binding protein domain	GO:0005525	NA	NA	K06944	developmentally-regulated GTP-binding protein [EC:3.6.5.-]
1254	COBS03368	508.391	0.78791	0.261557	3.10708	0.00188946	0.0422926	UP	IPR012675	Beta-grasp domain superfamily	-	NA	NA	K06944	developmentally-regulated GTP-binding protein [EC:3.6.5.-]
1255	COBS03368	508.391	0.78791	0.261557	3.10708	0.00188946	0.0422926	UP	IPR006074	GTP1/OBG, conserved site	GO:0005525	NA	NA	K06944	developmentally-regulated GTP-binding protein [EC:3.6.5.-]
1256	COBS03368	508.391	0.78791	0.261557	3.10708	0.00188946	0.0422926	UP	IPR004095	TGS	-	NA	NA	K06944	developmentally-regulated GTP-binding protein [EC:3.6.5.-]
1257	COBS03368	508.391	0.78791	0.261557	3.10708	0.00188946	0.0422926	UP	IPR012676	TGS-like	-	NA	NA	K06944	developmentally-regulated GTP-binding protein [EC:3.6.5.-]
1258	COBS03368	508.391	0.78791	0.261557	3.10708	0.00188946	0.0422926	UP	IPR031662	GTP binding protein, second domain	-	NA	NA	K06944	developmentally-regulated GTP-binding protein [EC:3.6.5.-]
1259	COBS03368	508.391	0.78791	0.261557	3.10708	0.00188946	0.0422926	UP	IPR045001	Developmentally regulated GTP-binding protein	GO:0003924|GO:0005525	PTHR43127	-	K06944	developmentally-regulated GTP-binding protein [EC:3.6.5.-]
1260	COBS03368	508.391	0.78791	0.261557	3.10708	0.00188946	0.0422926	UP	IPR027417	P-loop containing nucleoside triphosphate hydrolase	-	NA	NA	K06944	developmentally-regulated GTP-binding protein [EC:3.6.5.-]
1261	COBS03368	508.391	0.78791	0.261557	3.10708	0.00188946	0.0422926	UP	-	-		PTHR43127:SF1	DEVELOPMENTALLY-REGULATED GTP-BINDING PROTEIN 1	K06944	developmentally-regulated GTP-binding protein [EC:3.6.5.-]
1262	COBS03368	508.391	0.78791	0.261557	3.10708	0.00188946	0.0422926	UP	IPR006073	GTP binding domain	GO:0005525	NA	NA	K06944	developmentally-regulated GTP-binding protein [EC:3.6.5.-]
1267	COBS03368	508.391	0.78791	0.261557	3.10708	0.00188946	0.0422926	UP	IPR031167	OBG-type guanine nucleotide-binding (G) domain	GO:0005525	NA	NA	K06944	developmentally-regulated GTP-binding protein [EC:3.6.5.-]
7742	COBS17879	9334.66	0.78021	0.249029	3.29362	0.000989062	0.0276831	UP	IPR000235	Ribosomal protein S5/S7	GO:0006412	PTHR11205	RIBOSOMAL PROTEIN S7	K02989	small subunit ribosomal protein S5e
7743	COBS17879	9334.66	0.78021	0.249029	3.29362	0.000989062	0.0276831	UP	IPR023798	Ribosomal protein S7 domain	-	NA	NA	K02989	small subunit ribosomal protein S5e
7745	COBS17879	9334.66	0.78021	0.249029	3.29362	0.000989062	0.0276831	UP	IPR020606	Ribosomal protein S7, conserved site	GO:0003723|GO:0003735|GO:0006412	NA	NA	K02989	small subunit ribosomal protein S5e
7746	COBS17879	9334.66	0.78021	0.249029	3.29362	0.000989062	0.0276831	UP	IPR005716	Ribosomal protein S5/S7, eukaryotic/archaeal	GO:0003735|GO:0006412|GO:0015935	NA	NA	K02989	small subunit ribosomal protein S5e
7747	COBS17879	9334.66	0.78021	0.249029	3.29362	0.000989062	0.0276831	UP	-	-		PTHR11205:SF34	40S RIBOSOMAL PROTEIN S5	K02989	small subunit ribosomal protein S5e
7750	COBS17879	9334.66	0.78021	0.249029	3.29362	0.000989062	0.0276831	UP	IPR036823	Ribosomal protein S7 domain superfamily	-	NA	NA	K02989	small subunit ribosomal protein S5e
4286	COBS09223	5283.14	0.772226	0.21327	3.65923	0.000252971	0.010964	UP	IPR015421	Pyridoxal phosphate-dependent transferase, major domain	GO:0003824	NA	NA	K00814	alanine transaminase [EC:2.6.1.2]
4287	COBS09223	5283.14	0.772226	0.21327	3.65923	0.000252971	0.010964	UP	IPR004839	Aminotransferase, class I/classII	GO:0009058|GO:0030170	NA	NA	K00814	alanine transaminase [EC:2.6.1.2]
4290	COBS09223	5283.14	0.772226	0.21327	3.65923	0.000252971	0.010964	UP	IPR015424	Pyridoxal phosphate-dependent transferase	-	NA	NA	K00814	alanine transaminase [EC:2.6.1.2]
4291	COBS09223	5283.14	0.772226	0.21327	3.65923	0.000252971	0.010964	UP	IPR015422	Pyridoxal phosphate-dependent transferase, small domain	GO:0003824	NA	NA	K00814	alanine transaminase [EC:2.6.1.2]
4294	COBS09223	5283.14	0.772226	0.21327	3.65923	0.000252971	0.010964	UP	-	-		PTHR11751:SF308	ALANINE AMINOTRANSFERASE 1	K00814	alanine transaminase [EC:2.6.1.2]
4295	COBS09223	5283.14	0.772226	0.21327	3.65923	0.000252971	0.010964	UP	IPR045088	Aminotransferase ALAT1/2-like	GO:0008483	PTHR11751	ALANINE AMINOTRANSFERASE	K00814	alanine transaminase [EC:2.6.1.2]
7704	COBS17705	454.479	0.770527	0.205695	3.78648	0.000152798	0.00781269	UP	IPR006070	Threonylcarbamoyl-AMP synthase-like domain	GO:0003725	NA	NA	K07566	L-threonylcarbamoyladenylate synthase [EC:2.7.7.87]
7705	COBS17705	454.479	0.770527	0.205695	3.78648	0.000152798	0.00781269	UP	-	-		PTHR17490,PTHR17490:SF10	SUA5,YRDC DOMAIN-CONTAINING PROTEIN, MITOCHONDRIAL	K07566	L-threonylcarbamoyladenylate synthase [EC:2.7.7.87]
7706	COBS17705	454.479	0.770527	0.205695	3.78648	0.000152798	0.00781269	UP	IPR017945	DHBP synthase RibB-like alpha/beta domain superfamily	-	NA	NA	K07566	L-threonylcarbamoyladenylate synthase [EC:2.7.7.87]
3206	COBS06743	2656.07	0.762191	0.210119	3.64634	0.000266003	0.0114024	UP	IPR024931	Importin subunit alpha	GO:0005737|GO:0006606|GO:0061608	NA	NA	K23583	importin subunit alpha-4/3
3207	COBS06743	2656.07	0.762191	0.210119	3.64634	0.000266003	0.0114024	UP	IPR032413	Atypical Arm repeat	-	NA	NA	K23583	importin subunit alpha-4/3
3208	COBS06743	2656.07	0.762191	0.210119	3.64634	0.000266003	0.0114024	UP	-	-		PTHR23316:SF28,PTHR23316	IMPORTIN SUBUNIT ALPHA,IMPORTIN ALPHA	K23583	importin subunit alpha-4/3
3209	COBS06743	2656.07	0.762191	0.210119	3.64634	0.000266003	0.0114024	UP	IPR011989	Armadillo-like helical	-	NA	NA	K23583	importin subunit alpha-4/3
3210	COBS06743	2656.07	0.762191	0.210119	3.64634	0.000266003	0.0114024	UP	IPR002652	Importin-alpha, importin-beta-binding domain	GO:0006606|GO:0061608	NA	NA	K23583	importin subunit alpha-4/3
3212	COBS06743	2656.07	0.762191	0.210119	3.64634	0.000266003	0.0114024	UP	IPR016024	Armadillo-type fold	-	NA	NA	K23583	importin subunit alpha-4/3
3213	COBS06743	2656.07	0.762191	0.210119	3.64634	0.000266003	0.0114024	UP	IPR036975	Importin-alpha, importin-beta-binding domain superfamily	GO:0006606	NA	NA	K23583	importin subunit alpha-4/3
3215	COBS06743	2656.07	0.762191	0.210119	3.64634	0.000266003	0.0114024	UP	-	-		PTHR23316,PTHR23316:SF28	IMPORTIN ALPHA,IMPORTIN SUBUNIT ALPHA	K23583	importin subunit alpha-4/3
3216	COBS06743	2656.07	0.762191	0.210119	3.64634	0.000266003	0.0114024	UP	IPR000225	Armadillo	GO:0005515	NA	NA	K23583	importin subunit alpha-4/3
3205	COBS06691	236.717	0.76188	0.258763	3.11847	0.00181791	0.0412816	UP	-	-		NA	NA	NA	NA
4214	COBS09044	443.691	0.747166	0.204071	3.28476	0.0010207	0.0284162	UP	IPR029021	Protein-tyrosine phosphatase-like	-	NA	NA	K18042	serine/threonine/tyrosine-interacting protein
4215	COBS09044	443.691	0.747166	0.204071	3.28476	0.0010207	0.0284162	UP	IPR020422	Dual specificity protein phosphatase domain	GO:0006470|GO:0008138	NA	NA	K18042	serine/threonine/tyrosine-interacting protein
4217	COBS09044	443.691	0.747166	0.204071	3.28476	0.0010207	0.0284162	UP	-	-		PTHR46588	SERINE/THREONINE/TYROSINE-INTERACTING PROTEIN	K18042	serine/threonine/tyrosine-interacting protein
4219	COBS09044	443.691	0.747166	0.204071	3.28476	0.0010207	0.0284162	UP	IPR000387	Tyrosine-specific protein phosphatases domain	GO:0016311|GO:0016791	NA	NA	K18042	serine/threonine/tyrosine-interacting protein
4222	COBS09044	443.691	0.747166	0.204071	3.28476	0.0010207	0.0284162	UP	IPR000340	Dual specificity phosphatase, catalytic domain	GO:0008138|GO:0016311	NA	NA	K18042	serine/threonine/tyrosine-interacting protein
2259	COBS05377	755.077	0.743205	0.273354	3.41624	0.000634914	0.0204822	UP	IPR020552	Inositol monophosphatase, lithium-sensitive	GO:0046854	NA	NA	K01092	myo-inositol-1(or 4)-monophosphatase [EC:3.1.3.25]
2260	COBS05377	755.077	0.743205	0.273354	3.41624	0.000634914	0.0204822	UP	IPR033942	Inositol monophosphatase	GO:0008934|GO:0046855	NA	NA	K01092	myo-inositol-1(or 4)-monophosphatase [EC:3.1.3.25]
2261	COBS05377	755.077	0.743205	0.273354	3.41624	0.000634914	0.0204822	UP	-	-		PTHR20854	INOSITOL MONOPHOSPHATASE	K01092	myo-inositol-1(or 4)-monophosphatase [EC:3.1.3.25]
2262	COBS05377	755.077	0.743205	0.273354	3.41624	0.000634914	0.0204822	UP	IPR020550	Inositol monophosphatase, conserved site	GO:0046854	NA	NA	K01092	myo-inositol-1(or 4)-monophosphatase [EC:3.1.3.25]
2263	COBS05377	755.077	0.743205	0.273354	3.41624	0.000634914	0.0204822	UP	IPR000760	Inositol monophosphatase-like	GO:0046855	NA	NA	K01092	myo-inositol-1(or 4)-monophosphatase [EC:3.1.3.25]
2264	COBS05377	755.077	0.743205	0.273354	3.41624	0.000634914	0.0204822	UP	IPR020583	Inositol monophosphatase, metal-binding site	-	NA	NA	K01092	myo-inositol-1(or 4)-monophosphatase [EC:3.1.3.25]
1215	COBS03258	368.122	0.737198	0.226196	3.13667	0.00170879	0.0399638	UP	-	-		PTHR12507:SF3	RAB6A-GEF COMPLEX PARTNER PROTEIN 2	K20477	RAB6A-GEF complex partner protein 2
1216	COBS03258	368.122	0.737198	0.226196	3.13667	0.00170879	0.0399638	UP	IPR014848	Reduced growth phenotype protein 1	-	PTHR12507	REDUCED GROWTH PHENOTYPE 1 RGP1, YEAST -RELATED	K20477	RAB6A-GEF complex partner protein 2
7640	COBS17438	202.467	0.732009	0.279719	3.12336	0.001788	0.0410676	UP	IPR002616	tRNA-guanine(15) transglycosylase-like	GO:0006400|GO:0016763	NA	NA	K00777	queuine tRNA-ribosyltransferase catalytic subunit [EC:2.4.2.64]
7641	COBS17438	202.467	0.732009	0.279719	3.12336	0.001788	0.0410676	UP	-	-		PTHR43530	QUEUINE TRNA-RIBOSYLTRANSFERASE CATALYTIC SUBUNIT 1	K00777	queuine tRNA-ribosyltransferase catalytic subunit [EC:2.4.2.64]
7642	COBS17438	202.467	0.732009	0.279719	3.12336	0.001788	0.0410676	UP	IPR036511	Queuine tRNA-ribosyltransferase-like	GO:0006400|GO:0016763	NA	NA	K00777	queuine tRNA-ribosyltransferase catalytic subunit [EC:2.4.2.64]
7644	COBS17438	202.467	0.732009	0.279719	3.12336	0.001788	0.0410676	UP	IPR004803	tRNA-guanine transglycosylase	GO:0008479|GO:0101030	NA	NA	K00777	queuine tRNA-ribosyltransferase catalytic subunit [EC:2.4.2.64]
5738	COBS11962	839.11	0.731543	0.24185	3.03201	0.0024293	0.0496848	UP	IPR018795	Uncharacterized protein KIAA2013-like	-	PTHR31386	UNCHARACTERIZED PROTEIN KIAA2013	NA	NA
7046	COBS15501	370.208	0.72701	0.21593	3.36188	0.000774135	0.023668	UP	IPR018108	Mitochondrial substrate/solute carrier	-	NA	NA	K26152	solute carrier family 25 (mitochondrial nicotinamide adenine dinucleotide transporter), member 51/52
7047	COBS15501	370.208	0.72701	0.21593	3.36188	0.000774135	0.023668	UP	IPR023395	Mitochondrial carrier domain superfamily	-	NA	NA	K26152	solute carrier family 25 (mitochondrial nicotinamide adenine dinucleotide transporter), member 51/52
7050	COBS15501	370.208	0.72701	0.21593	3.36188	0.000774135	0.023668	UP	-	-		PTHR46131,PTHR46131:SF1	SD08549P,SD08549P	K26152	solute carrier family 25 (mitochondrial nicotinamide adenine dinucleotide transporter), member 51/52
3270	COBS06875	1647.02	0.72199	0.221486	3.61618	0.000298988	0.0123756	UP	IPR006966	Peroxin-3	GO:0005779|GO:0007031	PTHR28080	PEROXISOMAL BIOGENESIS FACTOR 3	K13336	peroxin-3
3934	COBS08255	264.727	0.72092	0.215563	3.47476	0.000511309	0.0175147	UP	IPR009428	Beta-catenin-interacting ICAT domain	GO:0008013	NA	NA	NA	NA
3935	COBS08255	264.727	0.72092	0.215563	3.47476	0.000511309	0.0175147	UP	IPR036911	Beta-catenin-interacting ICAT superfamily	GO:0008013	NA	NA	NA	NA
3936	COBS08255	264.727	0.72092	0.215563	3.47476	0.000511309	0.0175147	UP	IPR040065	Protein LZIC	-	PTHR16505	PROTEIN LZIC	NA	NA
3937	COBS08255	264.727	0.72092	0.215563	3.47476	0.000511309	0.0175147	UP	-	-		NA	NA	NA	NA
3271	COBS06880	42715.6	0.718563	0.220591	3.48881	0.000485181	0.0168794	UP	IPR000640	Elongation factor EFG, domain V-like	-	NA	NA	K03234	elongation factor 2
3272	COBS06880	42715.6	0.718563	0.220591	3.48881	0.000485181	0.0168794	UP	IPR041095	Elongation Factor G, domain II	-	NA	NA	K03234	elongation factor 2
3273	COBS06880	42715.6	0.718563	0.220591	3.48881	0.000485181	0.0168794	UP	-	-		PTHR42908:SF27,PTHR42908	ELONGATION FACTOR 2,TRANSLATION ELONGATION FACTOR-RELATED	K03234	elongation factor 2
3274	COBS06880	42715.6	0.718563	0.220591	3.48881	0.000485181	0.0168794	UP	IPR000795	Translational (tr)-type GTP-binding domain	GO:0003924|GO:0005525	NA	NA	K03234	elongation factor 2
3276	COBS06880	42715.6	0.718563	0.220591	3.48881	0.000485181	0.0168794	UP	IPR005517	Translation elongation factor EFG/EF2, domain IV	GO:0005525	NA	NA	K03234	elongation factor 2
3278	COBS06880	42715.6	0.718563	0.220591	3.48881	0.000485181	0.0168794	UP	IPR014721	Ribosomal protein S5 domain 2-type fold, subgroup	-	NA	NA	K03234	elongation factor 2
3279	COBS06880	42715.6	0.718563	0.220591	3.48881	0.000485181	0.0168794	UP	IPR020568	Ribosomal protein S5 domain 2-type fold	-	NA	NA	K03234	elongation factor 2
3280	COBS06880	42715.6	0.718563	0.220591	3.48881	0.000485181	0.0168794	UP	IPR004161	Translation elongation factor EFTu-like, domain 2	GO:0005525	NA	NA	K03234	elongation factor 2
3281	COBS06880	42715.6	0.718563	0.220591	3.48881	0.000485181	0.0168794	UP	IPR009000	Translation protein, beta-barrel domain superfamily	-	NA	NA	K03234	elongation factor 2
3283	COBS06880	42715.6	0.718563	0.220591	3.48881	0.000485181	0.0168794	UP	IPR035647	EF-G domain III/V-like	-	NA	NA	K03234	elongation factor 2
3284	COBS06880	42715.6	0.718563	0.220591	3.48881	0.000485181	0.0168794	UP	IPR031157	Tr-type G domain, conserved site	-	NA	NA	K03234	elongation factor 2
3286	COBS06880	42715.6	0.718563	0.220591	3.48881	0.000485181	0.0168794	UP	IPR027417	P-loop containing nucleoside triphosphate hydrolase	-	NA	NA	K03234	elongation factor 2
3288	COBS06880	42715.6	0.718563	0.220591	3.48881	0.000485181	0.0168794	UP	IPR005225	Small GTP-binding protein domain	GO:0005525	NA	NA	K03234	elongation factor 2
7418	COBS16350	1072.4	0.712343	0.148775	4.71256	2.45e-06	0.000306192	UP	IPR001841	Zinc finger, RING-type	-	NA	NA	K22379	E3 ubiquitin-protein ligase RNFT1 [EC:2.3.2.27]
7420	COBS16350	1072.4	0.712343	0.148775	4.71256	2.45e-06	0.000306192	UP	-	-		NA	NA	K22379	E3 ubiquitin-protein ligase RNFT1 [EC:2.3.2.27]
7421	COBS16350	1072.4	0.712343	0.148775	4.71256	2.45e-06	0.000306192	UP	IPR017907	Zinc finger, RING-type, conserved site	-	NA	NA	K22379	E3 ubiquitin-protein ligase RNFT1 [EC:2.3.2.27]
7423	COBS16350	1072.4	0.712343	0.148775	4.71256	2.45e-06	0.000306192	UP	IPR044235	RING finger and transmembrane domain-containing protein 1/2	GO:0061630|GO:1904294	PTHR15860	UNCHARACTERIZED RING FINGER-CONTAINING PROTEIN	K22379	E3 ubiquitin-protein ligase RNFT1 [EC:2.3.2.27]
7426	COBS16350	1072.4	0.712343	0.148775	4.71256	2.45e-06	0.000306192	UP	IPR013083	Zinc finger, RING/FYVE/PHD-type	-	NA	NA	K22379	E3 ubiquitin-protein ligase RNFT1 [EC:2.3.2.27]
4869	COBS09914	1376.48	0.709478	0.223264	3.2109	0.00132318	0.0332303	UP	IPR009038	GOLD domain	-	NA	NA	NA	NA
4870	COBS09914	1376.48	0.709478	0.223264	3.2109	0.00132318	0.0332303	UP	-	-		PTHR22811:SF60	TRANSMEMBRANE EMP24 DOMAIN-CONTAINING PROTEIN 3	NA	NA
4871	COBS09914	1376.48	0.709478	0.223264	3.2109	0.00132318	0.0332303	UP	IPR036598	GOLD domain superfamily	-	NA	NA	NA	NA
4872	COBS09914	1376.48	0.709478	0.223264	3.2109	0.00132318	0.0332303	UP	IPR015720	Transmembrane emp24 domain-containing protein	-	PTHR22811	TRANSMEMBRANE EMP24 DOMAIN-CONTAINING PROTEIN	NA	NA
8293	COBS19508	1218.71	0.693296	0.195883	3.34431	0.000824884	0.0245831	UP	IPR008428	Chondroitin N-acetylgalactosaminyltransferase	GO:0008376|GO:0032580	NA	NA	K00747	chondroitin polymerizing factor [EC:2.4.1.175 2.4.1.226]
8294	COBS19508	1218.71	0.693296	0.195883	3.34431	0.000824884	0.0245831	UP	-	-		PTHR12369:SF13,PTHR12369	HEXOSYLTRANSFERASE,CHONDROITIN SYNTHASE	K00747	chondroitin polymerizing factor [EC:2.4.1.175 2.4.1.226]
3485	COBS07299	3011.23	0.693103	0.252511	3.05795	0.00222858	0.0466779	UP	-	-		PTHR12399:SF0	EUKARYOTIC TRANSLATION INITIATION FACTOR 3 SUBUNIT D	K03251	translation initiation factor 3 subunit D
3486	COBS07299	3011.23	0.693103	0.252511	3.05795	0.00222858	0.0466779	UP	IPR007783	Eukaryotic translation initiation factor 3 subunit D	GO:0003743|GO:0005737|GO:0005852	PTHR12399	EUKARYOTIC TRANSLATION INITIATION FACTOR 3 SUBUNIT 7	K03251	translation initiation factor 3 subunit D
606	COBS01735	619.513	0.687253	0.182543	3.2435	0.00118071	0.0310223	UP	IPR011990	Tetratricopeptide-like helical domain superfamily	GO:0005515	NA	NA	K07126	uncharacterized protein
607	COBS01735	619.513	0.687253	0.182543	3.2435	0.00118071	0.0310223	UP	-	-		PTHR45011	DAP3-BINDING CELL DEATH ENHANCER 1	K07126	uncharacterized protein
608	COBS01735	619.513	0.687253	0.182543	3.2435	0.00118071	0.0310223	UP	IPR006597	Sel1-like repeat	-	NA	NA	K07126	uncharacterized protein
3382	COBS07007	1266.56	0.678542	0.210841	3.46353	0.000533147	0.0179776	UP	IPR018202	Serine carboxypeptidase, serine active site	GO:0004185	NA	NA	K09645	vitellogenic carboxypeptidase-like protein [EC:3.4.16.-]
3383	COBS07007	1266.56	0.678542	0.210841	3.46353	0.000533147	0.0179776	UP	-	-		PTHR11802:SF113	CARBOXYPEPTIDASE Y	K09645	vitellogenic carboxypeptidase-like protein [EC:3.4.16.-]
3384	COBS07007	1266.56	0.678542	0.210841	3.46353	0.000533147	0.0179776	UP	IPR033124	Serine carboxypeptidases, histidine active site	GO:0004185	NA	NA	K09645	vitellogenic carboxypeptidase-like protein [EC:3.4.16.-]
3385	COBS07007	1266.56	0.678542	0.210841	3.46353	0.000533147	0.0179776	UP	IPR029058	Alpha/Beta hydrolase fold	-	NA	NA	K09645	vitellogenic carboxypeptidase-like protein [EC:3.4.16.-]
3386	COBS07007	1266.56	0.678542	0.210841	3.46353	0.000533147	0.0179776	UP	IPR001563	Peptidase S10, serine carboxypeptidase	GO:0004185|GO:0006508	PTHR11802	SERINE PROTEASE FAMILY S10 SERINE CARBOXYPEPTIDASE	K09645	vitellogenic carboxypeptidase-like protein [EC:3.4.16.-]
1687	COBS03836	3153.13	0.678163	0.205522	3.26917	0.00107862	0.029232	UP	IPR004299	Membrane bound O-acyl transferase, MBOAT	-	NA	NA	K13517	lysophospholipid acyltransferase 1/2 [EC:2.3.1.51 2.3.1.-]
1688	COBS03836	3153.13	0.678163	0.205522	3.26917	0.00107862	0.029232	UP	-	-		PTHR13906:SF4,PTHR13906	OYSGEDART, ISOFORM A,PORCUPINE	K13517	lysophospholipid acyltransferase 1/2 [EC:2.3.1.51 2.3.1.-]
1690	COBS03836	3153.13	0.678163	0.205522	3.26917	0.00107862	0.029232	UP	-	-		PTHR13906,PTHR13906:SF4	PORCUPINE,OYSGEDART, ISOFORM A	K13517	lysophospholipid acyltransferase 1/2 [EC:2.3.1.51 2.3.1.-]
6458	COBS15151	11514.1	0.66307	0.20662	3.38406	0.000714218	0.0223879	UP	IPR038581	Ornithine decarboxylase antizyme superfamily	-	NA	NA	NA	NA
6459	COBS15151	11514.1	0.66307	0.20662	3.38406	0.000714218	0.0223879	UP	IPR002993	Ornithine decarboxylase antizyme	GO:0008073	PTHR10279	ORNITHINE DECARBOXYLASE ANTIZYME	NA	NA
6460	COBS15151	11514.1	0.66307	0.20662	3.38406	0.000714218	0.0223879	UP	IPR016181	Acyl-CoA N-acyltransferase	-	NA	NA	NA	NA
2680	COBS05770	971.952	0.661025	0.203618	3.57539	0.000349711	0.0138521	UP	IPR016093	MIR motif	-	NA	NA	K00728	dolichyl-phosphate-mannose-protein mannosyltransferase [EC:2.4.1.109]
2682	COBS05770	971.952	0.661025	0.203618	3.57539	0.000349711	0.0138521	UP	IPR036300	Mir domain superfamily	-	NA	NA	K00728	dolichyl-phosphate-mannose-protein mannosyltransferase [EC:2.4.1.109]
2683	COBS05770	971.952	0.661025	0.203618	3.57539	0.000349711	0.0138521	UP	IPR003342	Glycosyl transferase family 39/83	GO:0000030|GO:0006493|GO:0016020	NA	NA	K00728	dolichyl-phosphate-mannose-protein mannosyltransferase [EC:2.4.1.109]
2685	COBS05770	971.952	0.661025	0.203618	3.57539	0.000349711	0.0138521	UP	IPR032421	Protein O-mannosyl-transferase, C-terminal four TM domain	-	NA	NA	K00728	dolichyl-phosphate-mannose-protein mannosyltransferase [EC:2.4.1.109]
2686	COBS05770	971.952	0.661025	0.203618	3.57539	0.000349711	0.0138521	UP	-	-		NA	NA	K00728	dolichyl-phosphate-mannose-protein mannosyltransferase [EC:2.4.1.109]
2687	COBS05770	971.952	0.661025	0.203618	3.57539	0.000349711	0.0138521	UP	IPR027005	Glycosyltransferase 39-like	-	PTHR10050	DOLICHYL-PHOSPHATE-MANNOSE--PROTEIN MANNOSYLTRANSFERASE	K00728	dolichyl-phosphate-mannose-protein mannosyltransferase [EC:2.4.1.109]
8300	COBS19548	967.879	0.65092	0.172035	3.86652	0.000110398	0.00628107	UP	-	-		PTHR10758	26S PROTEASOME NON-ATPASE REGULATORY SUBUNIT 3/COP9 SIGNALOSOME COMPLEX SUBUNIT 3	K12177	COP9 signalosome complex subunit 3
8301	COBS19548	967.879	0.65092	0.172035	3.86652	0.000110398	0.00628107	UP	IPR036390	Winged helix DNA-binding domain superfamily	-	NA	NA	K12177	COP9 signalosome complex subunit 3
8302	COBS19548	967.879	0.65092	0.172035	3.86652	0.000110398	0.00628107	UP	IPR037753	COP9 signalosome complex subunit 3	GO:0008180	PTHR10758:SF1	COP9 SIGNALOSOME COMPLEX SUBUNIT 3	K12177	COP9 signalosome complex subunit 3
8303	COBS19548	967.879	0.65092	0.172035	3.86652	0.000110398	0.00628107	UP	IPR000717	Proteasome component (PCI) domain	-	NA	NA	K12177	COP9 signalosome complex subunit 3
2746	COBS05975	1590.56	0.634907	0.16614	3.99542	6.46e-05	0.00414095	UP	IPR037202	ESCRT assembly domain	-	NA	NA	K12183	ESCRT-I complex subunit TSG101
2747	COBS05975	1590.56	0.634907	0.16614	3.99542	6.46e-05	0.00414095	UP	-	-		PTHR23306	TUMOR SUSCEPTIBILITY GENE 101 PROTEIN-RELATED	K12183	ESCRT-I complex subunit TSG101
2749	COBS05975	1590.56	0.634907	0.16614	3.99542	6.46e-05	0.00414095	UP	IPR008883	Ubiquitin E2 variant, N-terminal	GO:0015031|GO:0036211	NA	NA	K12183	ESCRT-I complex subunit TSG101
2750	COBS05975	1590.56	0.634907	0.16614	3.99542	6.46e-05	0.00414095	UP	IPR017916	Steadiness box (SB) domain	-	NA	NA	K12183	ESCRT-I complex subunit TSG101
2753	COBS05975	1590.56	0.634907	0.16614	3.99542	6.46e-05	0.00414095	UP	IPR016135	Ubiquitin-conjugating enzyme/RWD-like	-	NA	NA	K12183	ESCRT-I complex subunit TSG101
841	COBS02506	805.114	0.633879	0.203688	3.51153	0.000445533	0.0160633	UP	-	-		PTHR12879	SPHINGOLIPID DELTA 4 DESATURASE/C-4 HYDROXYLASE PROTEIN DES2	K04712	sphingolipid 4-desaturase/C4-monooxygenase [EC:1.14.19.17 1.14.18.5]
842	COBS02506	805.114	0.633879	0.203688	3.51153	0.000445533	0.0160633	UP	IPR005804	Fatty acid desaturase domain	GO:0006629	NA	NA	K04712	sphingolipid 4-desaturase/C4-monooxygenase [EC:1.14.19.17 1.14.18.5]
843	COBS02506	805.114	0.633879	0.203688	3.51153	0.000445533	0.0160633	UP	IPR011388	Sphingolipid delta4-desaturase	GO:0016021|GO:0030148|GO:0042284	NA	NA	K04712	sphingolipid 4-desaturase/C4-monooxygenase [EC:1.14.19.17 1.14.18.5]
844	COBS02506	805.114	0.633879	0.203688	3.51153	0.000445533	0.0160633	UP	IPR013866	Sphingolipid delta4-desaturase, N-terminal	-	NA	NA	K04712	sphingolipid 4-desaturase/C4-monooxygenase [EC:1.14.19.17 1.14.18.5]
6461	COBS15202	977.408	0.627834	0.213205	3.44357	0.000574089	0.0188702	UP	IPR003378	Fringe-like	GO:0016020|GO:0016757	NA	NA	K00731	glycoprotein-N-acetylgalactosamine 3-beta-galactosyltransferase [EC:2.4.1.122]
6462	COBS15202	977.408	0.627834	0.213205	3.44357	0.000574089	0.0188702	UP	-	-		PTHR23033	BETA1,3-GALACTOSYLTRANSFERASE	K00731	glycoprotein-N-acetylgalactosamine 3-beta-galactosyltransferase [EC:2.4.1.122]
6465	COBS15202	977.408	0.627834	0.213205	3.44357	0.000574089	0.0188702	UP	IPR026842	Glycoprotein-N-acetylgalactosamine 3-beta-galactosyltransferase 1	GO:0016263|GO:0016266	PTHR23033:SF13	GLYCOPROTEIN-N-ACETYLGALACTOSAMINE 3-BETA-GALACTOSYLTRANSFERASE 1	K00731	glycoprotein-N-acetylgalactosamine 3-beta-galactosyltransferase [EC:2.4.1.122]
2643	COBS05639	773.162	0.626395	0.160868	3.8739	0.000107106	0.00616097	UP	IPR016632	Conserved oligomeric Golgi complex subunit 8, Metazoal and Viridiplantae	GO:0017119	NA	NA	K20295	conserved oligomeric Golgi complex subunit 8
2644	COBS05639	773.162	0.626395	0.160868	3.8739	0.000107106	0.00616097	UP	IPR016159	Cullin repeat-like-containing domain superfamily	-	NA	NA	K20295	conserved oligomeric Golgi complex subunit 8
2646	COBS05639	773.162	0.626395	0.160868	3.8739	0.000107106	0.00616097	UP	IPR007255	Conserved oligomeric Golgi complex subunit 8	GO:0017119	PTHR21311	CONSERVED OLIGOMERIC GOLGI COMPLEX COMPONENT 8	K20295	conserved oligomeric Golgi complex subunit 8
2649	COBS05639	773.162	0.626395	0.160868	3.8739	0.000107106	0.00616097	UP	-	-		NA	NA	K20295	conserved oligomeric Golgi complex subunit 8
4878	COBS10007	1127.88	0.626211	0.19433	3.19308	0.00140762	0.0345197	UP	IPR026509	Transmembrane protein 183	-	PTHR20988	UNCHARACTERIZED	NA	NA
7730	COBS17870	1198.22	0.593527	0.173554	3.55395	0.000379498	0.014482	UP	IPR042276	F-actin-capping protein subunit alpha/beta, domain 2	-	NA	NA	K10365	F-actin-capping protein subunit beta
7731	COBS17870	1198.22	0.593527	0.173554	3.55395	0.000379498	0.014482	UP	IPR019771	F-actin capping protein, beta subunit, conserved site	GO:0003779|GO:0005737|GO:0008290|GO:0030036	NA	NA	K10365	F-actin-capping protein subunit beta
7733	COBS17870	1198.22	0.593527	0.173554	3.55395	0.000379498	0.014482	UP	IPR037282	F-actin-capping protein subunit alpha/beta	-	NA	NA	K10365	F-actin-capping protein subunit beta
7734	COBS17870	1198.22	0.593527	0.173554	3.55395	0.000379498	0.014482	UP	IPR001698	F-actin-capping protein subunit beta	GO:0008290|GO:0051016	PTHR10619	F-ACTIN-CAPPING PROTEIN SUBUNIT BETA	K10365	F-actin-capping protein subunit beta
7736	COBS17870	1198.22	0.593527	0.173554	3.55395	0.000379498	0.014482	UP	-	-		NA	NA	K10365	F-actin-capping protein subunit beta
7739	COBS17870	1198.22	0.593527	0.173554	3.55395	0.000379498	0.014482	UP	IPR043175	F-actin-capping protein subunit beta, N-terminal domain	-	NA	NA	K10365	F-actin-capping protein subunit beta
5777	COBS12142	1.35995	0.592718	1.12485	13.5091	1.38e-41	2.16e-38	UP	-	-		NA	NA	NA	NA
6989	COBS15396	70402.7	0.586679	0.18643	3.60924	0.00030709	0.0125778	UP	-	-		PTHR23115:SF236,PTHR23115	ELONGATION FACTOR 1-ALPHA 1,TRANSLATION FACTOR	K03231	elongation factor 1-alpha
6990	COBS15396	70402.7	0.586679	0.18643	3.60924	0.00030709	0.0125778	UP	IPR009000	Translation protein, beta-barrel domain superfamily	-	NA	NA	K03231	elongation factor 1-alpha
6991	COBS15396	70402.7	0.586679	0.18643	3.60924	0.00030709	0.0125778	UP	IPR000795	Translational (tr)-type GTP-binding domain	GO:0003924|GO:0005525	NA	NA	K03231	elongation factor 1-alpha
6992	COBS15396	70402.7	0.586679	0.18643	3.60924	0.00030709	0.0125778	UP	IPR027417	P-loop containing nucleoside triphosphate hydrolase	-	NA	NA	K03231	elongation factor 1-alpha
6993	COBS15396	70402.7	0.586679	0.18643	3.60924	0.00030709	0.0125778	UP	-	-		PTHR23115,PTHR23115:SF236	TRANSLATION FACTOR,ELONGATION FACTOR 1-ALPHA 1	K03231	elongation factor 1-alpha
6994	COBS15396	70402.7	0.586679	0.18643	3.60924	0.00030709	0.0125778	UP	IPR004160	Translation elongation factor EFTu/EF1A, C-terminal	-	NA	NA	K03231	elongation factor 1-alpha
6996	COBS15396	70402.7	0.586679	0.18643	3.60924	0.00030709	0.0125778	UP	IPR004161	Translation elongation factor EFTu-like, domain 2	GO:0005525	NA	NA	K03231	elongation factor 1-alpha
6997	COBS15396	70402.7	0.586679	0.18643	3.60924	0.00030709	0.0125778	UP	IPR004539	Translation elongation factor EF1A, eukaryotic/archaeal	GO:0003746|GO:0005525|GO:0006414	NA	NA	K03231	elongation factor 1-alpha
7001	COBS15396	70402.7	0.586679	0.18643	3.60924	0.00030709	0.0125778	UP	IPR031157	Tr-type G domain, conserved site	-	NA	NA	K03231	elongation factor 1-alpha
7004	COBS15396	70402.7	0.586679	0.18643	3.60924	0.00030709	0.0125778	UP	IPR009001	Translation elongation factor EF1A/initiation factor IF2gamma, C-terminal	-	NA	NA	K03231	elongation factor 1-alpha
426	COBS00983	3247.47	0.582493	0.214778	3.06665	0.00216473	0.046037	UP	IPR006214	Bax inhibitor 1-related	-	PTHR23291	BAX INHIBITOR-RELATED	K24205	protein lifeguard
427	COBS00983	3247.47	0.582493	0.214778	3.06665	0.00216473	0.046037	UP	-	-		PTHR23291:SF47	RIKEN CDNA 4930511M11, ISOFORM CRA_C	K24205	protein lifeguard
428	COBS00983	3247.47	0.582493	0.214778	3.06665	0.00216473	0.046037	UP	-	-		PTHR23291:SF81	X-BOX PROMOTER ELEMENT REGULATED	K24205	protein lifeguard
6035	COBS13086	95.5875	0.575116	1.13549	7.45566	8.94e-14	3.33e-11	UP	-	-		NA	NA	NA	NA
4280	COBS09195	1366.69	0.540132	0.169752	3.26972	0.00107654	0.029232	UP	IPR046450	PA domain superfamily	-	NA	NA	K15692	E3 ubiquitin-protein ligase RNF13 [EC:2.3.2.27]
4281	COBS09195	1366.69	0.540132	0.169752	3.26972	0.00107654	0.029232	UP	IPR013083	Zinc finger, RING/FYVE/PHD-type	-	NA	NA	K15692	E3 ubiquitin-protein ligase RNF13 [EC:2.3.2.27]
4282	COBS09195	1366.69	0.540132	0.169752	3.26972	0.00107654	0.029232	UP	-	-		PTHR22765,PTHR22765:SF35	RING FINGER AND PROTEASE ASSOCIATED DOMAIN-CONTAINING,E3 UBIQUITIN-PROTEIN LIGASE RNF167	K15692	E3 ubiquitin-protein ligase RNF13 [EC:2.3.2.27]
4283	COBS09195	1366.69	0.540132	0.169752	3.26972	0.00107654	0.029232	UP	IPR003137	PA domain	-	NA	NA	K15692	E3 ubiquitin-protein ligase RNF13 [EC:2.3.2.27]
4284	COBS09195	1366.69	0.540132	0.169752	3.26972	0.00107654	0.029232	UP	IPR001841	Zinc finger, RING-type	-	NA	NA	K15692	E3 ubiquitin-protein ligase RNF13 [EC:2.3.2.27]
4285	COBS09195	1366.69	0.540132	0.169752	3.26972	0.00107654	0.029232	UP	IPR044744	ZNRF4 /RNF13/RNF167, PA domain	-	NA	NA	K15692	E3 ubiquitin-protein ligase RNF13 [EC:2.3.2.27]
2058	COBS04744	701.602	0.537339	0.158737	3.36175	0.000774512	0.023668	UP	IPR011042	Six-bladed beta-propeller, TolB-like	-	NA	NA	K18200	peptidylamidoglycolate lyase [EC:4.3.2.5]
2059	COBS04744	701.602	0.537339	0.158737	3.36175	0.000774512	0.023668	UP	IPR001258	NHL repeat	GO:0005515	NA	NA	K18200	peptidylamidoglycolate lyase [EC:4.3.2.5]
2060	COBS04744	701.602	0.537339	0.158737	3.36175	0.000774512	0.023668	UP	-	-		PTHR10680,PTHR10680:SF31	PEPTIDYL-GLYCINE ALPHA-AMIDATING MONOOXYGENASE,PEPTIDYL-ALPHA-HYDROXYGLYCINE ALPHA-AMIDATING LYASE 1-RELATED	K18200	peptidylamidoglycolate lyase [EC:4.3.2.5]
2061	COBS04744	701.602	0.537339	0.158737	3.36175	0.000774512	0.023668	UP	IPR000720	Peptidylglycine alpha-hydroxylating monooxygenase/peptidyl-hydroxyglycine alpha-amidating lyase	GO:0003824|GO:0006518|GO:0016020	NA	NA	K18200	peptidylamidoglycolate lyase [EC:4.3.2.5]
1104	COBS03000	2933.01	0.530099	0.183299	3.09103	0.00199462	0.0437248	UP	IPR019775	WD40 repeat, conserved site	-	NA	NA	K24736	WD repeat-containing protein 1 (actin-interacting protein 1)
1105	COBS03000	2933.01	0.530099	0.183299	3.09103	0.00199462	0.0437248	UP	IPR015943	WD40/YVTN repeat-like-containing domain superfamily	GO:0005515	NA	NA	K24736	WD repeat-containing protein 1 (actin-interacting protein 1)
1106	COBS03000	2933.01	0.530099	0.183299	3.09103	0.00199462	0.0437248	UP	IPR001680	WD40 repeat	GO:0005515	NA	NA	K24736	WD repeat-containing protein 1 (actin-interacting protein 1)
1107	COBS03000	2933.01	0.530099	0.183299	3.09103	0.00199462	0.0437248	UP	IPR020472	G-protein beta WD-40 repeat	-	NA	NA	K24736	WD repeat-containing protein 1 (actin-interacting protein 1)
1108	COBS03000	2933.01	0.530099	0.183299	3.09103	0.00199462	0.0437248	UP	-	-		PTHR19856,PTHR19856:SF0	WD-REPEATCONTAINING PROTEIN WDR1,WD REPEAT-CONTAINING PROTEIN 1	K24736	WD repeat-containing protein 1 (actin-interacting protein 1)
1109	COBS03000	2933.01	0.530099	0.183299	3.09103	0.00199462	0.0437248	UP	IPR036322	WD40-repeat-containing domain superfamily	GO:0005515	NA	NA	K24736	WD repeat-containing protein 1 (actin-interacting protein 1)
4077	COBS08643	2.22614	0.527634	1.20817	5.77442	7.72e-09	1.75e-06	UP	IPR004117	Olfactory receptor, insect	GO:0004984|GO:0005549|GO:0007608|GO:0016020	NA	NA	K22984	odorant receptor
4078	COBS08643	2.22614	0.527634	1.20817	5.77442	7.72e-09	1.75e-06	UP	IPR004117	Olfactory receptor, insect	GO:0004984|GO:0005549|GO:0007608|GO:0016020	PTHR21137	ODORANT RECEPTOR	K22984	odorant receptor
237	COBS00712	3.40619	0.52412	1.20723	17.1233	9.95e-66	3.89e-62	UP	-	-		NA	NA	NA	NA
5830	COBS12285	1372.41	0.488689	0.15479	3.09294	0.00198187	0.0437185	UP	IPR004240	Nonaspanin (TM9SF)	GO:0016021	PTHR10766	TRANSMEMBRANE 9 SUPERFAMILY PROTEIN	K17086	transmembrane 9 superfamily member 2/4
5831	COBS12285	1372.41	0.488689	0.15479	3.09294	0.00198187	0.0437185	UP	-	-		PTHR10766:SF143	TRANSMEMBRANE 9 SUPERFAMILY MEMBER 4	K17086	transmembrane 9 superfamily member 2/4
530	COBS01411	1571.89	0.482789	0.147429	3.20025	0.00137306	0.0338847	UP	IPR013826	DNA topoisomerase, type IA, central region, subdomain 3	-	NA	NA	K03165	DNA topoisomerase III [EC:5.6.2.1]
531	COBS01411	1571.89	0.482789	0.147429	3.20025	0.00137306	0.0338847	UP	IPR006171	TOPRIM domain	-	NA	NA	K03165	DNA topoisomerase III [EC:5.6.2.1]
532	COBS01411	1571.89	0.482789	0.147429	3.20025	0.00137306	0.0338847	UP	IPR034144	DNA topoisomerase 3-like, TOPRIM domain	-	NA	NA	K03165	DNA topoisomerase III [EC:5.6.2.1]
533	COBS01411	1571.89	0.482789	0.147429	3.20025	0.00137306	0.0338847	UP	IPR000380	DNA topoisomerase, type IA	GO:0003677|GO:0003917|GO:0006265	PTHR11390	PROKARYOTIC DNA TOPOISOMERASE	K03165	DNA topoisomerase III [EC:5.6.2.1]
534	COBS01411	1571.89	0.482789	0.147429	3.20025	0.00137306	0.0338847	UP	IPR013824	DNA topoisomerase, type IA, central region, subdomain 1	-	NA	NA	K03165	DNA topoisomerase III [EC:5.6.2.1]
535	COBS01411	1571.89	0.482789	0.147429	3.20025	0.00137306	0.0338847	UP	IPR023406	DNA topoisomerase, type IA, active site	GO:0003917	NA	NA	K03165	DNA topoisomerase III [EC:5.6.2.1]
536	COBS01411	1571.89	0.482789	0.147429	3.20025	0.00137306	0.0338847	UP	IPR003601	DNA topoisomerase, type IA, domain 2	GO:0003677|GO:0003916|GO:0006265	NA	NA	K03165	DNA topoisomerase III [EC:5.6.2.1]
538	COBS01411	1571.89	0.482789	0.147429	3.20025	0.00137306	0.0338847	UP	IPR013825	DNA topoisomerase, type IA, central region, subdomain 2	-	NA	NA	K03165	DNA topoisomerase III [EC:5.6.2.1]
539	COBS01411	1571.89	0.482789	0.147429	3.20025	0.00137306	0.0338847	UP	IPR023405	DNA topoisomerase, type IA, core domain	-	NA	NA	K03165	DNA topoisomerase III [EC:5.6.2.1]
543	COBS01411	1571.89	0.482789	0.147429	3.20025	0.00137306	0.0338847	UP	IPR003602	DNA topoisomerase, type IA, DNA-binding domain	GO:0003677|GO:0003916|GO:0006265	NA	NA	K03165	DNA topoisomerase III [EC:5.6.2.1]
548	COBS01411	1571.89	0.482789	0.147429	3.20025	0.00137306	0.0338847	UP	-	-		PTHR11390:SF20	DNA TOPOISOMERASE 3-BETA-1	K03165	DNA topoisomerase III [EC:5.6.2.1]
552	COBS01411	1571.89	0.482789	0.147429	3.20025	0.00137306	0.0338847	UP	IPR013497	DNA topoisomerase, type IA, central	GO:0003677|GO:0003916|GO:0006265	NA	NA	K03165	DNA topoisomerase III [EC:5.6.2.1]
391	COBS00901	1312.96	0.476899	0.144514	3.71837	0.000200513	0.00936487	UP	IPR014729	Rossmann-like alpha/beta/alpha sandwich fold	-	NA	NA	K00968	choline-phosphate cytidylyltransferase [EC:2.7.7.15]
392	COBS00901	1312.96	0.476899	0.144514	3.71837	0.000200513	0.00936487	UP	IPR041723	CTP:phosphocholine cytidylyltransferase domain	-	NA	NA	K00968	choline-phosphate cytidylyltransferase [EC:2.7.7.15]
393	COBS00901	1312.96	0.476899	0.144514	3.71837	0.000200513	0.00936487	UP	IPR004821	Cytidyltransferase-like domain	GO:0003824|GO:0009058	NA	NA	K00968	choline-phosphate cytidylyltransferase [EC:2.7.7.15]
394	COBS00901	1312.96	0.476899	0.144514	3.71837	0.000200513	0.00936487	UP	-	-		PTHR10739:SF20	CHOLINE-PHOSPHATE CYTIDYLYLTRANSFERASE B	K00968	choline-phosphate cytidylyltransferase [EC:2.7.7.15]
397	COBS00901	1312.96	0.476899	0.144514	3.71837	0.000200513	0.00936487	UP	IPR045049	Choline-phosphate cytidylyltransferase Pcy1-like	GO:0004105|GO:0006657	PTHR10739	CYTIDYLYLTRANSFERASE	K00968	choline-phosphate cytidylyltransferase [EC:2.7.7.15]
7997	COBS18762	2189.28	0.434083	0.147058	3.07045	0.0021374	0.0457479	UP	-	-		PTHR13931:SF2	UBIQUITIN CONJUGATION FACTOR E4 A	K10596	ubiquitin conjugation factor E4 A [EC:2.3.2.27]
7998	COBS18762	2189.28	0.434083	0.147058	3.07045	0.0021374	0.0457479	UP	IPR003613	U-box domain	GO:0004842|GO:0016567	NA	NA	K10596	ubiquitin conjugation factor E4 A [EC:2.3.2.27]
7999	COBS18762	2189.28	0.434083	0.147058	3.07045	0.0021374	0.0457479	UP	IPR013083	Zinc finger, RING/FYVE/PHD-type	-	NA	NA	K10596	ubiquitin conjugation factor E4 A [EC:2.3.2.27]
8000	COBS18762	2189.28	0.434083	0.147058	3.07045	0.0021374	0.0457479	UP	IPR019474	Ubiquitin conjugation factor E4, core	GO:0000151|GO:0006511|GO:0016567|GO:0034450	NA	NA	K10596	ubiquitin conjugation factor E4 A [EC:2.3.2.27]
8001	COBS18762	2189.28	0.434083	0.147058	3.07045	0.0021374	0.0457479	UP	IPR045132	Ubiquitin conjugation factor E4	GO:0000151|GO:0030433|GO:0034450	PTHR13931	UBIQUITINATION FACTOR E4	K10596	ubiquitin conjugation factor E4 A [EC:2.3.2.27]
6038	COBS13356	4.15379	0.351498	1.17279	5.94782	2.72e-09	6.44e-07	UP	-	-		PTHR34239	-	NA	NA
236	COBS00666	14.9729	0.216575	1.1738	4.36748	1.26e-05	0.00114331	UP	-	-		NA	NA	NA	NA
7582	COBS17063	2.10475	0.158064	1.20707	5.97427	2.31e-09	5.56e-07	UP	-	-		NA	NA	NA	NA
2152	COBS05189	45.821	0.0292531	1.15856	5.07549	3.87e-07	6.17e-05	UP	-	-		NA	NA	NA	NA
831	COBS02421	55.9551	0.0107196	1.16114	6.38465	1.72e-10	4.27e-08	UP	IPR032071	Domain of unknown function DUF4806	-	NA	NA	NA	NA
440	COBS01213	276.459	0.00727426	1.21118	4.34208	1.41e-05	0.00123366	UP	-	-		NA	NA	NA	NA
7619	COBS17283	209.06	0.00125071	1.05251	5.70404	1.17e-08	2.51e-06	UP	-	-		NA	NA	NA	NA
8396	COBS20014	143.483	0.00117501	0.962384	4.86424	1.15e-06	0.000157695	UP	-	-		NA	NA	NA	NA
441	COBS01279	258.354	-0.018236	1.14675	-4.35532	1.33e-05	0.00118978	DOWN	-	-		NA	NA	NA	NA
565	COBS01444	1.90507	-0.117392	0.957778	-3.40641	0.000658223	0.0209432	DOWN	-	-		NA	NA	NA	NA
8392	COBS19907	7.92868	-0.160184	0.864057	-3.12809	0.00175949	0.0407233	DOWN	IPR036875	Zinc finger, CCHC-type superfamily	GO:0003676|GO:0008270	NA	NA	NA	NA
8393	COBS19907	7.92868	-0.160184	0.864057	-3.12809	0.00175949	0.0407233	DOWN	-	-		NA	NA	NA	NA
8394	COBS19907	7.92868	-0.160184	0.864057	-3.12809	0.00175949	0.0407233	DOWN	IPR001878	Zinc finger, CCHC-type	GO:0003676|GO:0008270	NA	NA	NA	NA
8395	COBS19907	7.92868	-0.160184	0.864057	-3.12809	0.00175949	0.0407233	DOWN	IPR036691	Endonuclease/exonuclease/phosphatase superfamily	-	NA	NA	NA	NA
8398	COBS20139	1.24931	-0.293037	0.941451	-6.40156	1.54e-10	3.94e-08	DOWN	-	-		NA	NA	NA	NA
2837	COBS06168	6.89655	-0.321107	1.19246	-5.04644	4.5e-07	7.04e-05	DOWN	-	-		PTHR34072	ENZYMATIC POLYPROTEIN-RELATED	NA	NA
2838	COBS06168	6.89655	-0.321107	1.19246	-5.04644	4.5e-07	7.04e-05	DOWN	IPR043502	DNA/RNA polymerase superfamily	-	NA	NA	NA	NA
2839	COBS06168	6.89655	-0.321107	1.19246	-5.04644	4.5e-07	7.04e-05	DOWN	IPR001878	Zinc finger, CCHC-type	GO:0003676|GO:0008270	NA	NA	NA	NA
2840	COBS06168	6.89655	-0.321107	1.19246	-5.04644	4.5e-07	7.04e-05	DOWN	IPR003034	SAP domain	-	NA	NA	NA	NA
2841	COBS06168	6.89655	-0.321107	1.19246	-5.04644	4.5e-07	7.04e-05	DOWN	IPR043128	Reverse transcriptase/Diguanylate cyclase domain	-	NA	NA	NA	NA
2842	COBS06168	6.89655	-0.321107	1.19246	-5.04644	4.5e-07	7.04e-05	DOWN	IPR036875	Zinc finger, CCHC-type superfamily	GO:0003676|GO:0008270	NA	NA	NA	NA
2843	COBS06168	6.89655	-0.321107	1.19246	-5.04644	4.5e-07	7.04e-05	DOWN	IPR000477	Reverse transcriptase domain	-	NA	NA	NA	NA
2844	COBS06168	6.89655	-0.321107	1.19246	-5.04644	4.5e-07	7.04e-05	DOWN	IPR036361	SAP domain superfamily	-	NA	NA	NA	NA
7005	COBS15427	3408.03	-0.437706	0.114074	-3.90141	9.56e-05	0.00571109	DOWN	IPR032415	TRPM, tetramerisation domain	GO:0051262	NA	NA	K04978	transient receptor potential cation channel subfamily M member 3
7007	COBS15427	3408.03	-0.437706	0.114074	-3.90141	9.56e-05	0.00571109	DOWN	IPR037162	TRPM, tetramerisation domain superfamily	GO:0051262	NA	NA	NA	NA
7008	COBS15427	3408.03	-0.437706	0.114074	-3.90141	9.56e-05	0.00571109	DOWN	-	-		PTHR13800,PTHR13800:SF1	TRANSIENT RECEPTOR POTENTIAL CATION CHANNEL, SUBFAMILY M, MEMBER 6,TRANSIENT RECEPTOR POTENTIAL CATION CHANNEL TRPM	K04978	transient receptor potential cation channel subfamily M member 3
7009	COBS15427	3408.03	-0.437706	0.114074	-3.90141	9.56e-05	0.00571109	DOWN	IPR037162	TRPM, tetramerisation domain superfamily	GO:0051262	NA	NA	K04978	transient receptor potential cation channel subfamily M member 3
7010	COBS15427	3408.03	-0.437706	0.114074	-3.90141	9.56e-05	0.00571109	DOWN	IPR005821	Ion transport domain	GO:0005216|GO:0006811|GO:0016020|GO:0055085	NA	NA	K04978	transient receptor potential cation channel subfamily M member 3
7012	COBS15427	3408.03	-0.437706	0.114074	-3.90141	9.56e-05	0.00571109	DOWN	IPR041491	TRPM, SLOG domain	-	NA	NA	K04978	transient receptor potential cation channel subfamily M member 3
7014	COBS15427	3408.03	-0.437706	0.114074	-3.90141	9.56e-05	0.00571109	DOWN	IPR032415	TRPM, tetramerisation domain	GO:0051262	NA	NA	NA	NA
7016	COBS15427	3408.03	-0.437706	0.114074	-3.90141	9.56e-05	0.00571109	DOWN	IPR005821	Ion transport domain	GO:0005216|GO:0006811|GO:0016020|GO:0055085	NA	NA	NA	NA
7020	COBS15427	3408.03	-0.437706	0.114074	-3.90141	9.56e-05	0.00571109	DOWN	-	-		PTHR13800:SF1,PTHR13800	TRANSIENT RECEPTOR POTENTIAL CATION CHANNEL TRPM,TRANSIENT RECEPTOR POTENTIAL CATION CHANNEL, SUBFAMILY M, MEMBER 6	K04978	transient receptor potential cation channel subfamily M member 3
7023	COBS15427	3408.03	-0.437706	0.114074	-3.90141	9.56e-05	0.00571109	DOWN	-	-		PTHR13800:SF1,PTHR13800	TRANSIENT RECEPTOR POTENTIAL CATION CHANNEL TRPM,TRANSIENT RECEPTOR POTENTIAL CATION CHANNEL, SUBFAMILY M, MEMBER 6	NA	NA
7041	COBS15427	3408.03	-0.437706	0.114074	-3.90141	9.56e-05	0.00571109	DOWN	IPR041491	TRPM, SLOG domain	-	NA	NA	NA	NA
7729	COBS17861	1.71135	-0.457789	1.06148	-8.00248	1.22e-15	5.45e-13	DOWN	-	-		NA	NA	NA	NA
5347	COBS10946	436.277	-0.500584	0.199206	-3.09663	0.00195732	0.0435003	DOWN	IPR013087	Zinc finger C2H2-type	-	NA	NA	NA	NA
5348	COBS10946	436.277	-0.500584	0.199206	-3.09663	0.00195732	0.0435003	DOWN	-	-		PTHR23235,PTHR23235:SF41	KRUEPPEL-LIKE TRANSCRIPTION FACTOR,KRUEPPEL-LIKE FACTOR 4	NA	NA
5349	COBS10946	436.277	-0.500584	0.199206	-3.09663	0.00195732	0.0435003	DOWN	-	-		PTHR23235:SF41,PTHR23235	KRUEPPEL-LIKE FACTOR 4,KRUEPPEL-LIKE TRANSCRIPTION FACTOR	NA	NA
5350	COBS10946	436.277	-0.500584	0.199206	-3.09663	0.00195732	0.0435003	DOWN	IPR036236	Zinc finger C2H2 superfamily	-	NA	NA	NA	NA
8168	COBS19035	8317.35	-0.532065	0.145547	-3.69208	0.000222427	0.00993782	DOWN	IPR019787	Zinc finger, PHD-finger	-	NA	NA	K11728	nucleosome-remodeling factor subunit BPTF
8169	COBS19035	8317.35	-0.532065	0.145547	-3.69208	0.000222427	0.00993782	DOWN	IPR019786	Zinc finger, PHD-type, conserved site	-	NA	NA	K11728	nucleosome-remodeling factor subunit BPTF
8170	COBS19035	8317.35	-0.532065	0.145547	-3.69208	0.000222427	0.00993782	DOWN	IPR018359	Bromodomain, conserved site	-	NA	NA	K11728	nucleosome-remodeling factor subunit BPTF
8171	COBS19035	8317.35	-0.532065	0.145547	-3.69208	0.000222427	0.00993782	DOWN	IPR038028	Nucleosome-remodeling factor subunit BPTF	GO:0006357|GO:0016589	PTHR45975	NUCLEOSOME-REMODELING FACTOR SUBUNIT BPTF	K11728	nucleosome-remodeling factor subunit BPTF
8172	COBS19035	8317.35	-0.532065	0.145547	-3.69208	0.000222427	0.00993782	DOWN	-	-		NA	NA	K11728	nucleosome-remodeling factor subunit BPTF
8173	COBS19035	8317.35	-0.532065	0.145547	-3.69208	0.000222427	0.00993782	DOWN	IPR011011	Zinc finger, FYVE/PHD-type	-	NA	NA	K11728	nucleosome-remodeling factor subunit BPTF
8174	COBS19035	8317.35	-0.532065	0.145547	-3.69208	0.000222427	0.00993782	DOWN	IPR013083	Zinc finger, RING/FYVE/PHD-type	-	NA	NA	K11728	nucleosome-remodeling factor subunit BPTF
8175	COBS19035	8317.35	-0.532065	0.145547	-3.69208	0.000222427	0.00993782	DOWN	IPR001487	Bromodomain	GO:0005515	NA	NA	K11728	nucleosome-remodeling factor subunit BPTF
8180	COBS19035	8317.35	-0.532065	0.145547	-3.69208	0.000222427	0.00993782	DOWN	IPR028942	WHIM1 domain	-	NA	NA	K11728	nucleosome-remodeling factor subunit BPTF
8181	COBS19035	8317.35	-0.532065	0.145547	-3.69208	0.000222427	0.00993782	DOWN	IPR001965	Zinc finger, PHD-type	-	NA	NA	K11728	nucleosome-remodeling factor subunit BPTF
8186	COBS19035	8317.35	-0.532065	0.145547	-3.69208	0.000222427	0.00993782	DOWN	IPR018501	DDT domain	-	NA	NA	K11728	nucleosome-remodeling factor subunit BPTF
8194	COBS19035	8317.35	-0.532065	0.145547	-3.69208	0.000222427	0.00993782	DOWN	IPR036427	Bromodomain-like superfamily	GO:0005515	NA	NA	K11728	nucleosome-remodeling factor subunit BPTF
685	COBS01993	1509.96	-0.544636	0.17961	-3.17625	0.0014919	0.0362534	DOWN	IPR013019	MAD homology, MH1	GO:0005667|GO:0006355|GO:0007179	NA	NA	K04501	mothers against decapentaplegic homolog 4
686	COBS01993	1509.96	-0.544636	0.17961	-3.17625	0.0014919	0.0362534	DOWN	IPR017855	SMAD-like domain superfamily	-	NA	NA	K04501	mothers against decapentaplegic homolog 4
688	COBS01993	1509.96	-0.544636	0.17961	-3.17625	0.0014919	0.0362534	DOWN	IPR008984	SMAD/FHA domain superfamily	GO:0005515	NA	NA	K04501	mothers against decapentaplegic homolog 4
690	COBS01993	1509.96	-0.544636	0.17961	-3.17625	0.0014919	0.0362534	DOWN	IPR003619	MAD homology 1, Dwarfin-type	GO:0006355	NA	NA	K04501	mothers against decapentaplegic homolog 4
692	COBS01993	1509.96	-0.544636	0.17961	-3.17625	0.0014919	0.0362534	DOWN	-	-		PTHR13703:SF50	EXPRESSED SEQUENCE CR929477-RELATED	K04501	mothers against decapentaplegic homolog 4
693	COBS01993	1509.96	-0.544636	0.17961	-3.17625	0.0014919	0.0362534	DOWN	IPR013790	Dwarfin	GO:0006355	PTHR13703	SMAD	K04501	mothers against decapentaplegic homolog 4
694	COBS01993	1509.96	-0.544636	0.17961	-3.17625	0.0014919	0.0362534	DOWN	IPR036578	SMAD MH1 domain superfamily	GO:0007179	NA	NA	K04501	mothers against decapentaplegic homolog 4
701	COBS01993	1509.96	-0.544636	0.17961	-3.17625	0.0014919	0.0362534	DOWN	IPR001132	SMAD domain, Dwarfin-type	GO:0006355	NA	NA	K04501	mothers against decapentaplegic homolog 4
5402	COBS11215	2218.85	-0.558962	1.2033	-7.83361	4.74e-15	2e-12	DOWN	-	-		NA	NA	NA	NA
5403	COBS11215	2218.85	-0.558962	1.2033	-7.83361	4.74e-15	2e-12	DOWN	IPR002557	Chitin binding domain	GO:0005576|GO:0008061	NA	NA	NA	NA
5404	COBS11215	2218.85	-0.558962	1.2033	-7.83361	4.74e-15	2e-12	DOWN	IPR036508	Chitin binding domain superfamily	GO:0008061	NA	NA	NA	NA
4876	COBS09962	4.02374	-0.563124	1.20384	-5.57302	2.5e-08	5.02e-06	DOWN	-	-		NA	NA	NA	NA
431	COBS01003	1505.12	-0.587474	0.178731	-3.64138	0.000271182	0.0115927	DOWN	IPR018586	Brinker DNA-binding domain	-	NA	NA	NA	NA
432	COBS01003	1505.12	-0.587474	0.178731	-3.64138	0.000271182	0.0115927	DOWN	-	-		NA	NA	NA	NA
433	COBS01003	1505.12	-0.587474	0.178731	-3.64138	0.000271182	0.0115927	DOWN	IPR018586	Brinker DNA-binding domain	-	NA	NA	K07483	transposase
434	COBS01003	1505.12	-0.587474	0.178731	-3.64138	0.000271182	0.0115927	DOWN	-	-		NA	NA	K07483	transposase
8259	COBS19280	73.8021	-0.591043	0.381782	-3.08207	0.00205564	0.0446083	DOWN	IPR041904	Tryptophan 5-hydroxylase, catalytic domain	-	NA	NA	K00502	tryptophan 5-monooxygenase [EC:1.14.16.4]
8260	COBS19280	73.8021	-0.591043	0.381782	-3.08207	0.00205564	0.0446083	DOWN	IPR019773	Tyrosine 3-monooxygenase-like	GO:0016714	NA	NA	K00500	phenylalanine-4-hydroxylase [EC:1.14.16.1]
8261	COBS19280	73.8021	-0.591043	0.381782	-3.08207	0.00205564	0.0446083	DOWN	IPR019774	Aromatic amino acid hydroxylase, C-terminal	GO:0016714	NA	NA	K00502	tryptophan 5-monooxygenase [EC:1.14.16.4]
8262	COBS19280	73.8021	-0.591043	0.381782	-3.08207	0.00205564	0.0446083	DOWN	IPR019773	Tyrosine 3-monooxygenase-like	GO:0016714	NA	NA	K00502	tryptophan 5-monooxygenase [EC:1.14.16.4]
8263	COBS19280	73.8021	-0.591043	0.381782	-3.08207	0.00205564	0.0446083	DOWN	IPR018301	Aromatic amino acid hydroxylase, iron/copper binding site	GO:0004497|GO:0005506|GO:0009072	NA	NA	K00500	phenylalanine-4-hydroxylase [EC:1.14.16.1]
8264	COBS19280	73.8021	-0.591043	0.381782	-3.08207	0.00205564	0.0446083	DOWN	IPR041904	Tryptophan 5-hydroxylase, catalytic domain	-	NA	NA	K00500	phenylalanine-4-hydroxylase [EC:1.14.16.1]
8265	COBS19280	73.8021	-0.591043	0.381782	-3.08207	0.00205564	0.0446083	DOWN	-	-		PTHR11473:SF37	GH12537P	K00500	phenylalanine-4-hydroxylase [EC:1.14.16.1]
8266	COBS19280	73.8021	-0.591043	0.381782	-3.08207	0.00205564	0.0446083	DOWN	IPR002912	ACT domain	-	NA	NA	K00500	phenylalanine-4-hydroxylase [EC:1.14.16.1]
8269	COBS19280	73.8021	-0.591043	0.381782	-3.08207	0.00205564	0.0446083	DOWN	IPR005963	Tryptophan 5-monooxygenase	GO:0004510|GO:0042427	NA	NA	K00500	phenylalanine-4-hydroxylase [EC:1.14.16.1]
8270	COBS19280	73.8021	-0.591043	0.381782	-3.08207	0.00205564	0.0446083	DOWN	IPR036329	Aromatic amino acid monoxygenase, C-terminal domain superfamily	-	NA	NA	K00500	phenylalanine-4-hydroxylase [EC:1.14.16.1]
8271	COBS19280	73.8021	-0.591043	0.381782	-3.08207	0.00205564	0.0446083	DOWN	IPR005963	Tryptophan 5-monooxygenase	GO:0004510|GO:0042427	NA	NA	K00502	tryptophan 5-monooxygenase [EC:1.14.16.4]
8272	COBS19280	73.8021	-0.591043	0.381782	-3.08207	0.00205564	0.0446083	DOWN	IPR045865	ACT-like domain	-	NA	NA	K00502	tryptophan 5-monooxygenase [EC:1.14.16.4]
8273	COBS19280	73.8021	-0.591043	0.381782	-3.08207	0.00205564	0.0446083	DOWN	IPR045865	ACT-like domain	-	NA	NA	K00500	phenylalanine-4-hydroxylase [EC:1.14.16.1]
8274	COBS19280	73.8021	-0.591043	0.381782	-3.08207	0.00205564	0.0446083	DOWN	IPR018301	Aromatic amino acid hydroxylase, iron/copper binding site	GO:0004497|GO:0005506|GO:0009072	NA	NA	K00502	tryptophan 5-monooxygenase [EC:1.14.16.4]
8275	COBS19280	73.8021	-0.591043	0.381782	-3.08207	0.00205564	0.0446083	DOWN	IPR001273	Aromatic amino acid hydroxylase	GO:0004497|GO:0005506|GO:0009072	PTHR11473	AROMATIC AMINO ACID HYDROXYLASE	K00502	tryptophan 5-monooxygenase [EC:1.14.16.4]
8276	COBS19280	73.8021	-0.591043	0.381782	-3.08207	0.00205564	0.0446083	DOWN	IPR036951	Aromatic amino acid hydroxylase superfamily	GO:0004497|GO:0005506|GO:0009072	NA	NA	K00500	phenylalanine-4-hydroxylase [EC:1.14.16.1]
8277	COBS19280	73.8021	-0.591043	0.381782	-3.08207	0.00205564	0.0446083	DOWN	-	-		PTHR11473:SF37	GH12537P	K00502	tryptophan 5-monooxygenase [EC:1.14.16.4]
8278	COBS19280	73.8021	-0.591043	0.381782	-3.08207	0.00205564	0.0446083	DOWN	IPR002912	ACT domain	-	NA	NA	K00502	tryptophan 5-monooxygenase [EC:1.14.16.4]
8279	COBS19280	73.8021	-0.591043	0.381782	-3.08207	0.00205564	0.0446083	DOWN	IPR001273	Aromatic amino acid hydroxylase	GO:0004497|GO:0005506|GO:0009072	PTHR11473	AROMATIC AMINO ACID HYDROXYLASE	K00500	phenylalanine-4-hydroxylase [EC:1.14.16.1]
8281	COBS19280	73.8021	-0.591043	0.381782	-3.08207	0.00205564	0.0446083	DOWN	IPR019774	Aromatic amino acid hydroxylase, C-terminal	GO:0016714	NA	NA	K00500	phenylalanine-4-hydroxylase [EC:1.14.16.1]
8287	COBS19280	73.8021	-0.591043	0.381782	-3.08207	0.00205564	0.0446083	DOWN	IPR036951	Aromatic amino acid hydroxylase superfamily	GO:0004497|GO:0005506|GO:0009072	NA	NA	K00502	tryptophan 5-monooxygenase [EC:1.14.16.4]
8288	COBS19280	73.8021	-0.591043	0.381782	-3.08207	0.00205564	0.0446083	DOWN	IPR036329	Aromatic amino acid monoxygenase, C-terminal domain superfamily	-	NA	NA	K00502	tryptophan 5-monooxygenase [EC:1.14.16.4]
5519	COBS11439	1288.42	-0.611534	0.143448	-4.16526	3.11e-05	0.00235063	DOWN	IPR016135	Ubiquitin-conjugating enzyme/RWD-like	-	NA	NA	K10576	ubiquitin-conjugating enzyme E2 H [EC:2.3.2.23]
5520	COBS11439	1288.42	-0.611534	0.143448	-4.16526	3.11e-05	0.00235063	DOWN	IPR023313	Ubiquitin-conjugating enzyme, active site	-	NA	NA	K10576	ubiquitin-conjugating enzyme E2 H [EC:2.3.2.23]
5521	COBS11439	1288.42	-0.611534	0.143448	-4.16526	3.11e-05	0.00235063	DOWN	IPR000608	Ubiquitin-conjugating enzyme E2	-	NA	NA	K10576	ubiquitin-conjugating enzyme E2 H [EC:2.3.2.23]
5522	COBS11439	1288.42	-0.611534	0.143448	-4.16526	3.11e-05	0.00235063	DOWN	-	-		PTHR24068:SF128,PTHR24068	UBIQUITIN-CONJUGATING ENZYME E2 H,UBIQUITIN-CONJUGATING ENZYME E2	K10576	ubiquitin-conjugating enzyme E2 H [EC:2.3.2.23]
5699	COBS11677	1963.02	-0.615959	0.230131	-3.10741	0.00188737	0.0422926	DOWN	IPR027417	P-loop containing nucleoside triphosphate hydrolase	-	NA	NA	K22804	structural maintenance of chromosomes protein 6
5700	COBS11677	1963.02	-0.615959	0.230131	-3.10741	0.00188737	0.0422926	DOWN	IPR003395	RecF/RecN/SMC, N-terminal	-	NA	NA	K22804	structural maintenance of chromosomes protein 6
5701	COBS11677	1963.02	-0.615959	0.230131	-3.10741	0.00188737	0.0422926	DOWN	-	-		PTHR19306	STRUCTURAL MAINTENANCE OF CHROMOSOMES 5,6 SMC5, SMC6	K22804	structural maintenance of chromosomes protein 6
7791	COBS18095	4658.99	-0.62527	0.186819	-3.43057	0.00060231	0.019592	DOWN	IPR038045	PHD finger protein 10	GO:0071564	PTHR10615:SF174	PHD FINGER PROTEIN 10	K22197	BRG1-associated factor 45A
7792	COBS18095	4658.99	-0.62527	0.186819	-3.43057	0.00060231	0.019592	DOWN	-	-		PTHR10615	HISTONE ACETYLTRANSFERASE	K22197	BRG1-associated factor 45A
7793	COBS18095	4658.99	-0.62527	0.186819	-3.43057	0.00060231	0.019592	DOWN	IPR001965	Zinc finger, PHD-type	-	NA	NA	K22197	BRG1-associated factor 45A
7795	COBS18095	4658.99	-0.62527	0.186819	-3.43057	0.00060231	0.019592	DOWN	IPR019787	Zinc finger, PHD-finger	-	NA	NA	K22197	BRG1-associated factor 45A
7797	COBS18095	4658.99	-0.62527	0.186819	-3.43057	0.00060231	0.019592	DOWN	IPR013083	Zinc finger, RING/FYVE/PHD-type	-	NA	NA	K22197	BRG1-associated factor 45A
7798	COBS18095	4658.99	-0.62527	0.186819	-3.43057	0.00060231	0.019592	DOWN	IPR011011	Zinc finger, FYVE/PHD-type	-	NA	NA	K22197	BRG1-associated factor 45A
4884	COBS10198	1377.84	-0.637705	0.195276	-3.67104	0.000241567	0.0106466	DOWN	IPR005821	Ion transport domain	GO:0005216|GO:0006811|GO:0016020|GO:0055085	NA	NA	K04967	transient receptor potential cation channel subfamily C member 4
4885	COBS10198	1377.84	-0.637705	0.195276	-3.67104	0.000241567	0.0106466	DOWN	IPR002110	Ankyrin repeat	GO:0005515	NA	NA	K04967	transient receptor potential cation channel subfamily C member 4
4886	COBS10198	1377.84	-0.637705	0.195276	-3.67104	0.000241567	0.0106466	DOWN	IPR013555	Transient receptor ion channel domain	-	NA	NA	K04967	transient receptor potential cation channel subfamily C member 4
4887	COBS10198	1377.84	-0.637705	0.195276	-3.67104	0.000241567	0.0106466	DOWN	IPR002153	Transient receptor potential channel, canonical	GO:0005262|GO:0016020|GO:0070588	PTHR10117	TRANSIENT RECEPTOR POTENTIAL CHANNEL	K04967	transient receptor potential cation channel subfamily C member 4
4890	COBS10198	1377.84	-0.637705	0.195276	-3.67104	0.000241567	0.0106466	DOWN	IPR036770	Ankyrin repeat-containing domain superfamily	-	NA	NA	K04967	transient receptor potential cation channel subfamily C member 4
4892	COBS10198	1377.84	-0.637705	0.195276	-3.67104	0.000241567	0.0106466	DOWN	IPR013555	Transient receptor ion channel domain	-	NA	NA	NA	NA
4893	COBS10198	1377.84	-0.637705	0.195276	-3.67104	0.000241567	0.0106466	DOWN	-	-		PTHR10117:SF51	TRANSIENT RECEPTOR POTENTIAL PROTEIN	K04967	transient receptor potential cation channel subfamily C member 4
4900	COBS10198	1377.84	-0.637705	0.195276	-3.67104	0.000241567	0.0106466	DOWN	IPR002110	Ankyrin repeat	GO:0005515	NA	NA	NA	NA
4906	COBS10198	1377.84	-0.637705	0.195276	-3.67104	0.000241567	0.0106466	DOWN	IPR005821	Ion transport domain	GO:0005216|GO:0006811|GO:0016020|GO:0055085	NA	NA	NA	NA
4909	COBS10198	1377.84	-0.637705	0.195276	-3.67104	0.000241567	0.0106466	DOWN	-	-		PTHR10117:SF51	TRANSIENT RECEPTOR POTENTIAL PROTEIN	NA	NA
4910	COBS10198	1377.84	-0.637705	0.195276	-3.67104	0.000241567	0.0106466	DOWN	IPR002153	Transient receptor potential channel, canonical	GO:0005262|GO:0016020|GO:0070588	PTHR10117	TRANSIENT RECEPTOR POTENTIAL CHANNEL	NA	NA
4922	COBS10198	1377.84	-0.637705	0.195276	-3.67104	0.000241567	0.0106466	DOWN	IPR036770	Ankyrin repeat-containing domain superfamily	-	NA	NA	NA	NA
8092	COBS18985	190.461	-0.638164	0.296391	-3.9301	8.49e-05	0.00514926	DOWN	IPR000217	Tubulin	GO:0005874|GO:0007017	PTHR11588	TUBULIN	K07374	tubulin alpha
8093	COBS18985	190.461	-0.638164	0.296391	-3.9301	8.49e-05	0.00514926	DOWN	-	-		PTHR11588:SF366	TUBULIN ALPHA-3 CHAIN	K07374	tubulin alpha
8094	COBS18985	190.461	-0.638164	0.296391	-3.9301	8.49e-05	0.00514926	DOWN	-	-		PTHR11588:SF304,PTHR11588:SF64	TUBULIN ALPHA CHAIN,TUBULIN ALPHA-1C CHAIN	K07374	tubulin alpha
8095	COBS18985	190.461	-0.638164	0.296391	-3.9301	8.49e-05	0.00514926	DOWN	IPR017975	Tubulin, conserved site	GO:0005525|GO:0005874|GO:0007017	NA	NA	K07374	tubulin alpha
8096	COBS18985	190.461	-0.638164	0.296391	-3.9301	8.49e-05	0.00514926	DOWN	IPR002452	Alpha tubulin	GO:0005200|GO:0005525|GO:0005874|GO:0007017	NA	NA	K07374	tubulin alpha
8097	COBS18985	190.461	-0.638164	0.296391	-3.9301	8.49e-05	0.00514926	DOWN	IPR037103	Tubulin/FtsZ-like, C-terminal domain	-	NA	NA	K07374	tubulin alpha
8099	COBS18985	190.461	-0.638164	0.296391	-3.9301	8.49e-05	0.00514926	DOWN	IPR003008	Tubulin/FtsZ, GTPase domain	GO:0005525	NA	NA	K07374	tubulin alpha
8100	COBS18985	190.461	-0.638164	0.296391	-3.9301	8.49e-05	0.00514926	DOWN	IPR023123	Tubulin, C-terminal	-	NA	NA	K07374	tubulin alpha
8101	COBS18985	190.461	-0.638164	0.296391	-3.9301	8.49e-05	0.00514926	DOWN	IPR018316	Tubulin/FtsZ, 2-layer sandwich domain	-	NA	NA	K07374	tubulin alpha
8108	COBS18985	190.461	-0.638164	0.296391	-3.9301	8.49e-05	0.00514926	DOWN	IPR036525	Tubulin/FtsZ, GTPase domain superfamily	-	NA	NA	K07374	tubulin alpha
8110	COBS18985	190.461	-0.638164	0.296391	-3.9301	8.49e-05	0.00514926	DOWN	IPR008280	Tubulin/FtsZ, C-terminal	-	NA	NA	K07374	tubulin alpha
8123	COBS18985	190.461	-0.638164	0.296391	-3.9301	8.49e-05	0.00514926	DOWN	-	-		PTHR11588:SF304	TUBULIN ALPHA CHAIN	K07374	tubulin alpha
4965	COBS10316	1869.7	-0.646332	0.174824	-3.71095	0.000206479	0.00955791	DOWN	IPR001611	Leucine-rich repeat	GO:0005515	NA	NA	NA	NA
4967	COBS10316	1869.7	-0.646332	0.174824	-3.71095	0.000206479	0.00955791	DOWN	IPR036872	CH domain superfamily	-	NA	NA	NA	NA
4968	COBS10316	1869.7	-0.646332	0.174824	-3.71095	0.000206479	0.00955791	DOWN	IPR032675	Leucine-rich repeat domain superfamily	-	NA	NA	NA	NA
4969	COBS10316	1869.7	-0.646332	0.174824	-3.71095	0.000206479	0.00955791	DOWN	IPR001715	Calponin homology domain	GO:0005515	NA	NA	NA	NA
4972	COBS10316	1869.7	-0.646332	0.174824	-3.71095	0.000206479	0.00955791	DOWN	-	-		PTHR48051,PTHR48051:SF5	-,LEUCINE-RICH REPEAT AND CALPONIN HOMOLOGY DOMAIN-CONTAINING PROTEIN 1-LIKE PROTEIN	NA	NA
4975	COBS10316	1869.7	-0.646332	0.174824	-3.71095	0.000206479	0.00955791	DOWN	IPR003591	Leucine-rich repeat, typical subtype	-	NA	NA	NA	NA
4979	COBS10316	1869.7	-0.646332	0.174824	-3.71095	0.000206479	0.00955791	DOWN	-	-		PTHR48051:SF5,PTHR48051	LEUCINE-RICH REPEAT AND CALPONIN HOMOLOGY DOMAIN-CONTAINING PROTEIN 1-LIKE PROTEIN,-	NA	NA
7665	COBS17556	1071.11	-0.656084	0.162904	-3.93816	8.21e-05	0.00503796	DOWN	-	-		PTHR23166,PTHR23166:SF5	FILAMIN/GPBP-INTERACTING PROTEIN,PROTEIN CBG17702	NA	NA
7666	COBS17556	1071.11	-0.656084	0.162904	-3.93816	8.21e-05	0.00503796	DOWN	IPR019131	Cortactin-binding protein-2, N-terminal	-	NA	NA	NA	NA
4813	COBS09853	2535.68	-0.671084	0.200845	-3.60076	0.000317292	0.012928	DOWN	IPR001849	Pleckstrin homology domain	-	NA	NA	K12488	Arf-GAP with SH3 domain, ANK repeat and PH domain-containing protein
4814	COBS09853	2535.68	-0.671084	0.200845	-3.60076	0.000317292	0.012928	DOWN	IPR035836	ASAP1-like, SH3 domain	-	NA	NA	K12488	Arf-GAP with SH3 domain, ANK repeat and PH domain-containing protein
4815	COBS09853	2535.68	-0.671084	0.200845	-3.60076	0.000317292	0.012928	DOWN	IPR043593	Arf-GAP with SH3 domain, ANK repeat and PH domain-containing protein	GO:0005096|GO:0043547	PTHR45854	ASAP FAMILY MEMBER	K12488	Arf-GAP with SH3 domain, ANK repeat and PH domain-containing protein
4816	COBS09853	2535.68	-0.671084	0.200845	-3.60076	0.000317292	0.012928	DOWN	IPR002110	Ankyrin repeat	GO:0005515	NA	NA	K12488	Arf-GAP with SH3 domain, ANK repeat and PH domain-containing protein
4817	COBS09853	2535.68	-0.671084	0.200845	-3.60076	0.000317292	0.012928	DOWN	IPR001164	Arf GTPase activating protein	GO:0005096	NA	NA	K12488	Arf-GAP with SH3 domain, ANK repeat and PH domain-containing protein
4819	COBS09853	2535.68	-0.671084	0.200845	-3.60076	0.000317292	0.012928	DOWN	IPR037844	ASAP, PH domain	GO:0005096|GO:0043547	NA	NA	K12488	Arf-GAP with SH3 domain, ANK repeat and PH domain-containing protein
4820	COBS09853	2535.68	-0.671084	0.200845	-3.60076	0.000317292	0.012928	DOWN	IPR027267	AH/BAR domain superfamily	-	NA	NA	K12488	Arf-GAP with SH3 domain, ANK repeat and PH domain-containing protein
4822	COBS09853	2535.68	-0.671084	0.200845	-3.60076	0.000317292	0.012928	DOWN	IPR011993	PH-like domain superfamily	-	NA	NA	K12488	Arf-GAP with SH3 domain, ANK repeat and PH domain-containing protein
4823	COBS09853	2535.68	-0.671084	0.200845	-3.60076	0.000317292	0.012928	DOWN	IPR037278	ARFGAP/RecO-like zinc finger	-	NA	NA	K12488	Arf-GAP with SH3 domain, ANK repeat and PH domain-containing protein
4824	COBS09853	2535.68	-0.671084	0.200845	-3.60076	0.000317292	0.012928	DOWN	IPR036028	SH3-like domain superfamily	GO:0005515	NA	NA	K12488	Arf-GAP with SH3 domain, ANK repeat and PH domain-containing protein
4826	COBS09853	2535.68	-0.671084	0.200845	-3.60076	0.000317292	0.012928	DOWN	IPR038508	ArfGAP domain superfamily	-	NA	NA	K12488	Arf-GAP with SH3 domain, ANK repeat and PH domain-containing protein
4827	COBS09853	2535.68	-0.671084	0.200845	-3.60076	0.000317292	0.012928	DOWN	-	-		PTHR45854:SF3	ARFGAP WITH SH3 DOMAIN, ANK REPEAT AND PH DOMAIN-CONTAINING PROTEIN	K12488	Arf-GAP with SH3 domain, ANK repeat and PH domain-containing protein
4831	COBS09853	2535.68	-0.671084	0.200845	-3.60076	0.000317292	0.012928	DOWN	IPR001452	SH3 domain	GO:0005515	NA	NA	K12488	Arf-GAP with SH3 domain, ANK repeat and PH domain-containing protein
4848	COBS09853	2535.68	-0.671084	0.200845	-3.60076	0.000317292	0.012928	DOWN	IPR036770	Ankyrin repeat-containing domain superfamily	-	NA	NA	K12488	Arf-GAP with SH3 domain, ANK repeat and PH domain-containing protein
2286	COBS05419	8246.24	-0.690815	0.207454	-3.09009	0.00200096	0.0437248	DOWN	IPR018359	Bromodomain, conserved site	-	NA	NA	K08871	bromodomain-containing protein 2
2287	COBS05419	8246.24	-0.690815	0.207454	-3.09009	0.00200096	0.0437248	DOWN	IPR027353	NET domain	-	NA	NA	K08871	bromodomain-containing protein 2
2288	COBS05419	8246.24	-0.690815	0.207454	-3.09009	0.00200096	0.0437248	DOWN	-	-		PTHR22880:SF225,PTHR22880	BROMODOMAIN-CONTAINING PROTEIN 2,FALZ-RELATED BROMODOMAIN-CONTAINING PROTEINS	NA	NA
2289	COBS05419	8246.24	-0.690815	0.207454	-3.09009	0.00200096	0.0437248	DOWN	IPR018359	Bromodomain, conserved site	-	NA	NA	K11722	bromodomain-containing protein 4
2290	COBS05419	8246.24	-0.690815	0.207454	-3.09009	0.00200096	0.0437248	DOWN	IPR043508	Brdt, bromodomain, repeat I	-	NA	NA	K11722	bromodomain-containing protein 4
2291	COBS05419	8246.24	-0.690815	0.207454	-3.09009	0.00200096	0.0437248	DOWN	IPR043508	Brdt, bromodomain, repeat I	-	NA	NA	NA	NA
2293	COBS05419	8246.24	-0.690815	0.207454	-3.09009	0.00200096	0.0437248	DOWN	IPR001487	Bromodomain	GO:0005515	NA	NA	K08871	bromodomain-containing protein 2
2295	COBS05419	8246.24	-0.690815	0.207454	-3.09009	0.00200096	0.0437248	DOWN	IPR043508	Brdt, bromodomain, repeat I	-	NA	NA	K08871	bromodomain-containing protein 2
2297	COBS05419	8246.24	-0.690815	0.207454	-3.09009	0.00200096	0.0437248	DOWN	-	-		PTHR22880,PTHR22880:SF143	FALZ-RELATED BROMODOMAIN-CONTAINING PROTEINS,BROMODOMAIN-CONTAINING PROTEIN 4	K11722	bromodomain-containing protein 4
2298	COBS05419	8246.24	-0.690815	0.207454	-3.09009	0.00200096	0.0437248	DOWN	IPR043509	Brdt, bromodomain, repeat II	-	NA	NA	K11722	bromodomain-containing protein 4
2301	COBS05419	8246.24	-0.690815	0.207454	-3.09009	0.00200096	0.0437248	DOWN	IPR036427	Bromodomain-like superfamily	GO:0005515	NA	NA	K11722	bromodomain-containing protein 4
2302	COBS05419	8246.24	-0.690815	0.207454	-3.09009	0.00200096	0.0437248	DOWN	IPR043509	Brdt, bromodomain, repeat II	-	NA	NA	K08871	bromodomain-containing protein 2
2303	COBS05419	8246.24	-0.690815	0.207454	-3.09009	0.00200096	0.0437248	DOWN	IPR038336	NET domain superfamily	-	NA	NA	K08871	bromodomain-containing protein 2
2306	COBS05419	8246.24	-0.690815	0.207454	-3.09009	0.00200096	0.0437248	DOWN	IPR001487	Bromodomain	GO:0005515	NA	NA	K11722	bromodomain-containing protein 4
2307	COBS05419	8246.24	-0.690815	0.207454	-3.09009	0.00200096	0.0437248	DOWN	IPR036427	Bromodomain-like superfamily	GO:0005515	NA	NA	K08871	bromodomain-containing protein 2
2308	COBS05419	8246.24	-0.690815	0.207454	-3.09009	0.00200096	0.0437248	DOWN	IPR038336	NET domain superfamily	-	NA	NA	K11722	bromodomain-containing protein 4
2310	COBS05419	8246.24	-0.690815	0.207454	-3.09009	0.00200096	0.0437248	DOWN	IPR036427	Bromodomain-like superfamily	GO:0005515	NA	NA	K11721	bromodomain-containing protein 3
2311	COBS05419	8246.24	-0.690815	0.207454	-3.09009	0.00200096	0.0437248	DOWN	IPR018359	Bromodomain, conserved site	-	NA	NA	NA	NA
2312	COBS05419	8246.24	-0.690815	0.207454	-3.09009	0.00200096	0.0437248	DOWN	IPR031354	Bromodomain protein 4, C-terminal	-	NA	NA	K11722	bromodomain-containing protein 4
2315	COBS05419	8246.24	-0.690815	0.207454	-3.09009	0.00200096	0.0437248	DOWN	IPR031354	Bromodomain protein 4, C-terminal	-	NA	NA	K08871	bromodomain-containing protein 2
2317	COBS05419	8246.24	-0.690815	0.207454	-3.09009	0.00200096	0.0437248	DOWN	-	-		PTHR22880,PTHR22880:SF143	FALZ-RELATED BROMODOMAIN-CONTAINING PROTEINS,BROMODOMAIN-CONTAINING PROTEIN 4	K08871	bromodomain-containing protein 2
2319	COBS05419	8246.24	-0.690815	0.207454	-3.09009	0.00200096	0.0437248	DOWN	IPR027353	NET domain	-	NA	NA	NA	NA
2322	COBS05419	8246.24	-0.690815	0.207454	-3.09009	0.00200096	0.0437248	DOWN	-	-		PTHR22880:SF143,PTHR22880	BROMODOMAIN-CONTAINING PROTEIN 4,FALZ-RELATED BROMODOMAIN-CONTAINING PROTEINS	K08871	bromodomain-containing protein 2
2323	COBS05419	8246.24	-0.690815	0.207454	-3.09009	0.00200096	0.0437248	DOWN	IPR038336	NET domain superfamily	-	NA	NA	K11721	bromodomain-containing protein 3
2329	COBS05419	8246.24	-0.690815	0.207454	-3.09009	0.00200096	0.0437248	DOWN	-	-		PTHR22880,PTHR22880:SF143	FALZ-RELATED BROMODOMAIN-CONTAINING PROTEINS,BROMODOMAIN-CONTAINING PROTEIN 4	K11721	bromodomain-containing protein 3
2341	COBS05419	8246.24	-0.690815	0.207454	-3.09009	0.00200096	0.0437248	DOWN	IPR027353	NET domain	-	NA	NA	K11722	bromodomain-containing protein 4
2345	COBS05419	8246.24	-0.690815	0.207454	-3.09009	0.00200096	0.0437248	DOWN	-	-		PTHR22880:SF143,PTHR22880	BROMODOMAIN-CONTAINING PROTEIN 4,FALZ-RELATED BROMODOMAIN-CONTAINING PROTEINS	K11722	bromodomain-containing protein 4
2355	COBS05419	8246.24	-0.690815	0.207454	-3.09009	0.00200096	0.0437248	DOWN	IPR043509	Brdt, bromodomain, repeat II	-	NA	NA	NA	NA
2360	COBS05419	8246.24	-0.690815	0.207454	-3.09009	0.00200096	0.0437248	DOWN	-	-		PTHR22880,PTHR22880:SF143	FALZ-RELATED BROMODOMAIN-CONTAINING PROTEINS,BROMODOMAIN-CONTAINING PROTEIN 4	NA	NA
2368	COBS05419	8246.24	-0.690815	0.207454	-3.09009	0.00200096	0.0437248	DOWN	-	-		PTHR22880,PTHR22880:SF225	FALZ-RELATED BROMODOMAIN-CONTAINING PROTEINS,BROMODOMAIN-CONTAINING PROTEIN 2	K11722	bromodomain-containing protein 4
2379	COBS05419	8246.24	-0.690815	0.207454	-3.09009	0.00200096	0.0437248	DOWN	IPR001487	Bromodomain	GO:0005515	NA	NA	K11721	bromodomain-containing protein 3
2383	COBS05419	8246.24	-0.690815	0.207454	-3.09009	0.00200096	0.0437248	DOWN	-	-		PTHR22880:SF225,PTHR22880	BROMODOMAIN-CONTAINING PROTEIN 2,FALZ-RELATED BROMODOMAIN-CONTAINING PROTEINS	K11722	bromodomain-containing protein 4
2391	COBS05419	8246.24	-0.690815	0.207454	-3.09009	0.00200096	0.0437248	DOWN	IPR043509	Brdt, bromodomain, repeat II	-	NA	NA	K11721	bromodomain-containing protein 3
2422	COBS05419	8246.24	-0.690815	0.207454	-3.09009	0.00200096	0.0437248	DOWN	-	-		PTHR22880:SF225,PTHR22880	BROMODOMAIN-CONTAINING PROTEIN 2,FALZ-RELATED BROMODOMAIN-CONTAINING PROTEINS	K08871	bromodomain-containing protein 2
2431	COBS05419	8246.24	-0.690815	0.207454	-3.09009	0.00200096	0.0437248	DOWN	IPR018359	Bromodomain, conserved site	-	NA	NA	K11721	bromodomain-containing protein 3
2447	COBS05419	8246.24	-0.690815	0.207454	-3.09009	0.00200096	0.0437248	DOWN	IPR038336	NET domain superfamily	-	NA	NA	NA	NA
2455	COBS05419	8246.24	-0.690815	0.207454	-3.09009	0.00200096	0.0437248	DOWN	-	-		PTHR22880,PTHR22880:SF225	FALZ-RELATED BROMODOMAIN-CONTAINING PROTEINS,BROMODOMAIN-CONTAINING PROTEIN 2	K08871	bromodomain-containing protein 2
2460	COBS05419	8246.24	-0.690815	0.207454	-3.09009	0.00200096	0.0437248	DOWN	IPR043508	Brdt, bromodomain, repeat I	-	NA	NA	K11721	bromodomain-containing protein 3
2474	COBS05419	8246.24	-0.690815	0.207454	-3.09009	0.00200096	0.0437248	DOWN	IPR036427	Bromodomain-like superfamily	GO:0005515	NA	NA	NA	NA
2502	COBS05419	8246.24	-0.690815	0.207454	-3.09009	0.00200096	0.0437248	DOWN	IPR001487	Bromodomain	GO:0005515	NA	NA	NA	NA
2525	COBS05419	8246.24	-0.690815	0.207454	-3.09009	0.00200096	0.0437248	DOWN	IPR031354	Bromodomain protein 4, C-terminal	-	NA	NA	K11721	bromodomain-containing protein 3
2526	COBS05419	8246.24	-0.690815	0.207454	-3.09009	0.00200096	0.0437248	DOWN	IPR027353	NET domain	-	NA	NA	K11721	bromodomain-containing protein 3
2536	COBS05419	8246.24	-0.690815	0.207454	-3.09009	0.00200096	0.0437248	DOWN	-	-		PTHR22880:SF143,PTHR22880	BROMODOMAIN-CONTAINING PROTEIN 4,FALZ-RELATED BROMODOMAIN-CONTAINING PROTEINS	K11721	bromodomain-containing protein 3
7565	COBS16927	5276.61	-0.693239	0.203187	-3.51351	0.00044223	0.0160537	DOWN	IPR006633	Carbohydrate-binding/sugar hydrolysis domain	-	NA	NA	K10297	F-box protein 11
7566	COBS16927	5276.61	-0.693239	0.203187	-3.51351	0.00044223	0.0160537	DOWN	IPR006626	Parallel beta-helix repeat	-	NA	NA	K10297	F-box protein 11
7567	COBS16927	5276.61	-0.693239	0.203187	-3.51351	0.00044223	0.0160537	DOWN	IPR003126	Zinc finger, UBR-type	GO:0008270	NA	NA	K10297	F-box protein 11
7568	COBS16927	5276.61	-0.693239	0.203187	-3.51351	0.00044223	0.0160537	DOWN	-	-		PTHR22990	F-BOX ONLY PROTEIN	K10297	F-box protein 11
7569	COBS16927	5276.61	-0.693239	0.203187	-3.51351	0.00044223	0.0160537	DOWN	IPR001810	F-box domain	GO:0005515	NA	NA	K10297	F-box protein 11
7570	COBS16927	5276.61	-0.693239	0.203187	-3.51351	0.00044223	0.0160537	DOWN	IPR036047	F-box-like domain superfamily	GO:0005515	NA	NA	K10297	F-box protein 11
7571	COBS16927	5276.61	-0.693239	0.203187	-3.51351	0.00044223	0.0160537	DOWN	IPR012334	Pectin lyase fold	-	NA	NA	K10297	F-box protein 11
7572	COBS16927	5276.61	-0.693239	0.203187	-3.51351	0.00044223	0.0160537	DOWN	IPR039448	Right handed beta helix domain	-	NA	NA	K10297	F-box protein 11
7573	COBS16927	5276.61	-0.693239	0.203187	-3.51351	0.00044223	0.0160537	DOWN	IPR022441	Parallel beta-helix repeat-2	-	NA	NA	K10297	F-box protein 11
7574	COBS16927	5276.61	-0.693239	0.203187	-3.51351	0.00044223	0.0160537	DOWN	IPR011050	Pectin lyase fold/virulence factor	-	NA	NA	K10297	F-box protein 11
7575	COBS16927	5276.61	-0.693239	0.203187	-3.51351	0.00044223	0.0160537	DOWN	IPR007742	Periplasmic copper-binding protein NosD, beta helix domain	-	NA	NA	K10297	F-box protein 11
7576	COBS16927	5276.61	-0.693239	0.203187	-3.51351	0.00044223	0.0160537	DOWN	IPR029799	F-box only protein 11	GO:0000151|GO:0016567	PTHR22990:SF20	F-BOX ONLY PROTEIN 11	K10297	F-box protein 11
2101	COBS04916	5542.27	-0.70933	0.22967	-3.23188	0.0012298	0.0317516	DOWN	IPR035979	RNA-binding domain superfamily	GO:0003676	NA	NA	K24990	RNA-binding motif, single-stranded-interacting protein
2102	COBS04916	5542.27	-0.70933	0.22967	-3.23188	0.0012298	0.0317516	DOWN	-	-		PTHR24012,PTHR24012:SF786	RNA BINDING PROTEIN,RNA-BINDING MOTIF, SINGLE-STRANDED-INTERACTING PROTEIN 2	K24990	RNA-binding motif, single-stranded-interacting protein
2103	COBS04916	5542.27	-0.70933	0.22967	-3.23188	0.0012298	0.0317516	DOWN	IPR012677	Nucleotide-binding alpha-beta plait domain superfamily	-	NA	NA	K24990	RNA-binding motif, single-stranded-interacting protein
2108	COBS04916	5542.27	-0.70933	0.22967	-3.23188	0.0012298	0.0317516	DOWN	IPR000504	RNA recognition motif domain	GO:0003723	NA	NA	K24990	RNA-binding motif, single-stranded-interacting protein
2109	COBS04916	5542.27	-0.70933	0.22967	-3.23188	0.0012298	0.0317516	DOWN	IPR002343	Paraneoplastic encephalomyelitis antigen	GO:0003723|GO:1990904	NA	NA	K24990	RNA-binding motif, single-stranded-interacting protein
2110	COBS04916	5542.27	-0.70933	0.22967	-3.23188	0.0012298	0.0317516	DOWN	-	-		PTHR24012:SF786,PTHR24012	RNA-BINDING MOTIF, SINGLE-STRANDED-INTERACTING PROTEIN 2,RNA BINDING PROTEIN	K24990	RNA-binding motif, single-stranded-interacting protein
2845	COBS06261	7938.57	-0.712524	0.195092	-3.45462	0.000551072	0.018408	DOWN	IPR019787	Zinc finger, PHD-finger	-	NA	NA	NA	NA
2846	COBS06261	7938.57	-0.712524	0.195092	-3.45462	0.000551072	0.018408	DOWN	IPR011011	Zinc finger, FYVE/PHD-type	-	NA	NA	NA	NA
2847	COBS06261	7938.57	-0.712524	0.195092	-3.45462	0.000551072	0.018408	DOWN	IPR019786	Zinc finger, PHD-type, conserved site	-	NA	NA	NA	NA
2848	COBS06261	7938.57	-0.712524	0.195092	-3.45462	0.000551072	0.018408	DOWN	IPR036575	Transcription elongation factor S-II, central domain superfamily	GO:0006351	NA	NA	NA	NA
2849	COBS06261	7938.57	-0.712524	0.195092	-3.45462	0.000551072	0.018408	DOWN	IPR013083	Zinc finger, RING/FYVE/PHD-type	-	NA	NA	NA	NA
2850	COBS06261	7938.57	-0.712524	0.195092	-3.45462	0.000551072	0.018408	DOWN	-	-		PTHR11477	TRANSCRIPTION FACTOR S-II ZINC FINGER DOMAIN-CONTAINING PROTEIN	NA	NA
2851	COBS06261	7938.57	-0.712524	0.195092	-3.45462	0.000551072	0.018408	DOWN	IPR012921	Spen paralogue and orthologue SPOC, C-terminal	-	NA	NA	NA	NA
2852	COBS06261	7938.57	-0.712524	0.195092	-3.45462	0.000551072	0.018408	DOWN	IPR001965	Zinc finger, PHD-type	-	NA	NA	NA	NA
2853	COBS06261	7938.57	-0.712524	0.195092	-3.45462	0.000551072	0.018408	DOWN	IPR037259	BRK domain superfamily	-	NA	NA	NA	NA
2854	COBS06261	7938.57	-0.712524	0.195092	-3.45462	0.000551072	0.018408	DOWN	IPR033082	Death-inducer obliterator 1	GO:0097190	PTHR11477:SF13	DEATH-INDUCER OBLITERATOR 1	NA	NA
2855	COBS06261	7938.57	-0.712524	0.195092	-3.45462	0.000551072	0.018408	DOWN	IPR006576	BRK domain	GO:0005515	NA	NA	NA	NA
2856	COBS06261	7938.57	-0.712524	0.195092	-3.45462	0.000551072	0.018408	DOWN	IPR003618	Transcription elongation factor S-II, central domain	GO:0006351	NA	NA	NA	NA
3951	COBS08366	6035.3	-0.723953	0.264124	-3.2347	0.00121772	0.0315962	DOWN	IPR001666	Phosphatidylinositol transfer protein	GO:0005548|GO:0015914	PTHR10658	PHOSPHATIDYLINOSITOL TRANSFER PROTEIN	K24069	membrane-associated phosphatidylinositol transfer protein
3953	COBS08366	6035.3	-0.723953	0.264124	-3.2347	0.00121772	0.0315962	DOWN	IPR004177	DDHD domain	GO:0046872	NA	NA	K24069	membrane-associated phosphatidylinositol transfer protein
3955	COBS08366	6035.3	-0.723953	0.264124	-3.2347	0.00121772	0.0315962	DOWN	IPR036412	HAD-like superfamily	-	NA	NA	K24069	membrane-associated phosphatidylinositol transfer protein
3956	COBS08366	6035.3	-0.723953	0.264124	-3.2347	0.00121772	0.0315962	DOWN	-	-		PTHR10658:SF41	MEMBRANE-ASSOCIATED PHOSPHATIDYLINOSITOL TRANSFER PROTEIN 2	K24069	membrane-associated phosphatidylinositol transfer protein
3957	COBS08366	6035.3	-0.723953	0.264124	-3.2347	0.00121772	0.0315962	DOWN	IPR023214	HAD superfamily	-	NA	NA	K24069	membrane-associated phosphatidylinositol transfer protein
3959	COBS08366	6035.3	-0.723953	0.264124	-3.2347	0.00121772	0.0315962	DOWN	IPR023393	START-like domain superfamily	-	NA	NA	K24069	membrane-associated phosphatidylinositol transfer protein
3961	COBS08366	6035.3	-0.723953	0.264124	-3.2347	0.00121772	0.0315962	DOWN	IPR031315	LNS2/PITP	-	NA	NA	K24069	membrane-associated phosphatidylinositol transfer protein
4003	COBS08366	6035.3	-0.723953	0.264124	-3.2347	0.00121772	0.0315962	DOWN	IPR023393	START-like domain superfamily	-	NA	NA	NA	NA
4011	COBS08366	6035.3	-0.723953	0.264124	-3.2347	0.00121772	0.0315962	DOWN	-	-		PTHR10658:SF40	MEMBRANE-ASSOCIATED PHOSPHATIDYLINOSITOL TRANSFER PROTEIN 1	NA	NA
4013	COBS08366	6035.3	-0.723953	0.264124	-3.2347	0.00121772	0.0315962	DOWN	IPR001666	Phosphatidylinositol transfer protein	GO:0005548|GO:0015914	PTHR10658	PHOSPHATIDYLINOSITOL TRANSFER PROTEIN	NA	NA
2153	COBS05260	19.1629	-0.726181	1.17624	-10.2139	1.72e-24	1.42e-21	DOWN	-	-		NA	NA	NA	NA
1137	COBS03123	3386.17	-0.726959	0.224721	-3.08511	0.00203475	0.0442778	DOWN	IPR000300	Inositol polyphosphate-related phosphatase	GO:0016791|GO:0046856	NA	NA	K01106	inositol polyphosphate 5-phosphatase INPP5A [EC:3.1.3.56]
1138	COBS03123	3386.17	-0.726959	0.224721	-3.08511	0.00203475	0.0442778	DOWN	-	-		PTHR12997:SF2	TYPE I INOSITOL 1,4,5-TRISPHOSPHATE 5-PHOSPHATASE	K01106	inositol polyphosphate 5-phosphatase INPP5A [EC:3.1.3.56]
1139	COBS03123	3386.17	-0.726959	0.224721	-3.08511	0.00203475	0.0442778	DOWN	IPR036691	Endonuclease/exonuclease/phosphatase superfamily	-	NA	NA	K01106	inositol polyphosphate 5-phosphatase INPP5A [EC:3.1.3.56]
1140	COBS03123	3386.17	-0.726959	0.224721	-3.08511	0.00203475	0.0442778	DOWN	IPR039737	Type I inositol 1,4,5-trisphosphate 5-phosphatase	GO:0004445	PTHR12997	TYPE I INOSITOL-1,4,5-TRISPHOSPHATE 5-PHOSPHATASE	K01106	inositol polyphosphate 5-phosphatase INPP5A [EC:3.1.3.56]
3140	COBS06668	3299.31	-0.75567	0.226989	-3.20988	0.00132792	0.033296	DOWN	IPR001680	WD40 repeat	GO:0005515	NA	NA	K04497	groucho
3141	COBS06668	3299.31	-0.75567	0.226989	-3.20988	0.00132792	0.033296	DOWN	IPR015943	WD40/YVTN repeat-like-containing domain superfamily	GO:0005515	NA	NA	K04497	groucho
3142	COBS06668	3299.31	-0.75567	0.226989	-3.20988	0.00132792	0.033296	DOWN	IPR036322	WD40-repeat-containing domain superfamily	GO:0005515	NA	NA	K04497	groucho
3143	COBS06668	3299.31	-0.75567	0.226989	-3.20988	0.00132792	0.033296	DOWN	IPR005617	Groucho/TLE, N-terminal Q-rich domain	GO:0005515	NA	NA	K04497	groucho
3144	COBS06668	3299.31	-0.75567	0.226989	-3.20988	0.00132792	0.033296	DOWN	IPR009146	Groucho/transducin-like enhancer	GO:0005634|GO:0006355	PTHR10814	TRANSDUCIN-LIKE ENHANCER PROTEIN	K04497	groucho
3150	COBS06668	3299.31	-0.75567	0.226989	-3.20988	0.00132792	0.033296	DOWN	IPR019775	WD40 repeat, conserved site	-	NA	NA	K04497	groucho
3151	COBS06668	3299.31	-0.75567	0.226989	-3.20988	0.00132792	0.033296	DOWN	-	-		PTHR10814:SF21	PROTEIN GROUCHO	K04497	groucho
3163	COBS06668	3299.31	-0.75567	0.226989	-3.20988	0.00132792	0.033296	DOWN	-	-		PTHR10814:SF4	TRANSDUCIN-LIKE ENHANCER PROTEIN 2	K04497	groucho
3168	COBS06668	3299.31	-0.75567	0.226989	-3.20988	0.00132792	0.033296	DOWN	IPR005617	Groucho/TLE, N-terminal Q-rich domain	GO:0005515	NA	NA	NA	NA
3180	COBS06668	3299.31	-0.75567	0.226989	-3.20988	0.00132792	0.033296	DOWN	IPR009146	Groucho/transducin-like enhancer	GO:0005634|GO:0006355	PTHR10814	TRANSDUCIN-LIKE ENHANCER PROTEIN	NA	NA
3190	COBS06668	3299.31	-0.75567	0.226989	-3.20988	0.00132792	0.033296	DOWN	-	-		PTHR10814:SF29	TRANSDUCIN-LIKE ENHANCER PROTEIN 1	NA	NA
3191	COBS06668	3299.31	-0.75567	0.226989	-3.20988	0.00132792	0.033296	DOWN	-	-		PTHR10814:SF31	TLE FAMILY MEMBER 5-RELATED	K04497	groucho
5776	COBS12140	3.55558	-0.758722	1.14432	-7.18644	6.65e-13	2.26e-10	DOWN	-	-		NA	NA	NA	NA
4084	COBS08777	6766.37	-0.760928	0.249695	-3.11912	0.00181392	0.0412575	DOWN	IPR008145	Guanylate kinase/L-type calcium channel beta subunit	-	NA	NA	K06091	MAGUK p55 subfamily member 5
4085	COBS08777	6766.37	-0.760928	0.249695	-3.11912	0.00181392	0.0412575	DOWN	-	-		PTHR23122	MEMBRANE-ASSOCIATED GUANYLATE KINASE MAGUK	K06091	MAGUK p55 subfamily member 5
4086	COBS08777	6766.37	-0.760928	0.249695	-3.11912	0.00181392	0.0412575	DOWN	IPR004172	L27 domain	GO:0005515	NA	NA	K06091	MAGUK p55 subfamily member 5
4088	COBS08777	6766.37	-0.760928	0.249695	-3.11912	0.00181392	0.0412575	DOWN	IPR008144	Guanylate kinase-like domain	-	NA	NA	K06091	MAGUK p55 subfamily member 5
4089	COBS08777	6766.37	-0.760928	0.249695	-3.11912	0.00181392	0.0412575	DOWN	IPR036034	PDZ superfamily	GO:0005515	NA	NA	K06091	MAGUK p55 subfamily member 5
4092	COBS08777	6766.37	-0.760928	0.249695	-3.11912	0.00181392	0.0412575	DOWN	IPR035601	MPP5, SH3 domain	-	NA	NA	K06091	MAGUK p55 subfamily member 5
4094	COBS08777	6766.37	-0.760928	0.249695	-3.11912	0.00181392	0.0412575	DOWN	IPR027417	P-loop containing nucleoside triphosphate hydrolase	-	NA	NA	K06091	MAGUK p55 subfamily member 5
4096	COBS08777	6766.37	-0.760928	0.249695	-3.11912	0.00181392	0.0412575	DOWN	IPR001452	SH3 domain	GO:0005515	NA	NA	K06091	MAGUK p55 subfamily member 5
4097	COBS08777	6766.37	-0.760928	0.249695	-3.11912	0.00181392	0.0412575	DOWN	IPR020590	Guanylate kinase, conserved site	-	NA	NA	K06091	MAGUK p55 subfamily member 5
4103	COBS08777	6766.37	-0.760928	0.249695	-3.11912	0.00181392	0.0412575	DOWN	IPR001478	PDZ domain	GO:0005515	NA	NA	K06091	MAGUK p55 subfamily member 5
4104	COBS08777	6766.37	-0.760928	0.249695	-3.11912	0.00181392	0.0412575	DOWN	IPR031185	MAGUK p55 subfamily member 5-like	GO:0070830|GO:0090162	PTHR23122:SF14	MAGUK P55 SUBFAMILY MEMBER 5	K06091	MAGUK p55 subfamily member 5
4106	COBS08777	6766.37	-0.760928	0.249695	-3.11912	0.00181392	0.0412575	DOWN	IPR036028	SH3-like domain superfamily	GO:0005515	NA	NA	K06091	MAGUK p55 subfamily member 5
4109	COBS08777	6766.37	-0.760928	0.249695	-3.11912	0.00181392	0.0412575	DOWN	-	-		NA	NA	NA	NA
4119	COBS08777	6766.37	-0.760928	0.249695	-3.11912	0.00181392	0.0412575	DOWN	IPR036034	PDZ superfamily	GO:0005515	NA	NA	NA	NA
180	COBS00489	760.345	-0.763973	0.261473	-3.59984	0.000318413	0.01294	DOWN	-	-		PTHR47537,PTHR47537:SF2	CUBILIN,CUBILIN	NA	NA
181	COBS00489	760.345	-0.763973	0.261473	-3.59984	0.000318413	0.01294	DOWN	IPR000859	CUB domain	-	NA	NA	NA	NA
182	COBS00489	760.345	-0.763973	0.261473	-3.59984	0.000318413	0.01294	DOWN	IPR035914	Spermadhesin, CUB domain superfamily	-	NA	NA	NA	NA
3008	COBS06409	5499.86	-0.785985	0.295365	-3.12301	0.00179011	0.0410676	DOWN	IPR000198	Rho GTPase-activating protein domain	GO:0007165	NA	NA	K07526	SLIT-ROBO Rho GTPase activating protein
3009	COBS06409	5499.86	-0.785985	0.295365	-3.12301	0.00179011	0.0410676	DOWN	IPR027267	AH/BAR domain superfamily	-	NA	NA	K07526	SLIT-ROBO Rho GTPase activating protein
3010	COBS06409	5499.86	-0.785985	0.295365	-3.12301	0.00179011	0.0410676	DOWN	IPR008936	Rho GTPase activation protein	GO:0007165	NA	NA	K07526	SLIT-ROBO Rho GTPase activating protein
3011	COBS06409	5499.86	-0.785985	0.295365	-3.12301	0.00179011	0.0410676	DOWN	IPR036028	SH3-like domain superfamily	GO:0005515	NA	NA	K07526	SLIT-ROBO Rho GTPase activating protein
3012	COBS06409	5499.86	-0.785985	0.295365	-3.12301	0.00179011	0.0410676	DOWN	-	-		PTHR14166,PTHR14166:SF17	SLIT-ROBO RHO GTPASE ACTIVATING PROTEIN,SLIT-ROBO GAP HOMOLOG	K07526	SLIT-ROBO Rho GTPase activating protein
3013	COBS06409	5499.86	-0.785985	0.295365	-3.12301	0.00179011	0.0410676	DOWN	-	-		PTHR14166:SF17,PTHR14166	SLIT-ROBO GAP HOMOLOG,SLIT-ROBO RHO GTPASE ACTIVATING PROTEIN	K07526	SLIT-ROBO Rho GTPase activating protein
3016	COBS06409	5499.86	-0.785985	0.295365	-3.12301	0.00179011	0.0410676	DOWN	IPR001060	FCH domain	-	NA	NA	K07526	SLIT-ROBO Rho GTPase activating protein
3017	COBS06409	5499.86	-0.785985	0.295365	-3.12301	0.00179011	0.0410676	DOWN	IPR031160	F-BAR domain	-	NA	NA	K07526	SLIT-ROBO Rho GTPase activating protein
3021	COBS06409	5499.86	-0.785985	0.295365	-3.12301	0.00179011	0.0410676	DOWN	IPR001452	SH3 domain	GO:0005515	NA	NA	K07526	SLIT-ROBO Rho GTPase activating protein
78	COBS00225	2534.06	-0.786985	0.191345	-4.17847	2.93e-05	0.00226009	DOWN	IPR000719	Protein kinase domain	GO:0004672|GO:0005524|GO:0006468	NA	NA	K08291	G protein-coupled receptor kinase [EC:2.7.11.16]
79	COBS00225	2534.06	-0.786985	0.191345	-4.17847	2.93e-05	0.00226009	DOWN	-	-		PTHR24355,PTHR24355:SF28	G PROTEIN-COUPLED RECEPTOR KINASE/RIBOSOMAL PROTEIN S6 KINASE,G PROTEIN-COUPLED RECEPTOR KINASE 2	K08291	G protein-coupled receptor kinase [EC:2.7.11.16]
80	COBS00225	2534.06	-0.786985	0.191345	-4.17847	2.93e-05	0.00226009	DOWN	IPR036305	RGS domain superfamily	-	NA	NA	K08291	G protein-coupled receptor kinase [EC:2.7.11.16]
81	COBS00225	2534.06	-0.786985	0.191345	-4.17847	2.93e-05	0.00226009	DOWN	IPR011009	Protein kinase-like domain superfamily	-	NA	NA	K08291	G protein-coupled receptor kinase [EC:2.7.11.16]
82	COBS00225	2534.06	-0.786985	0.191345	-4.17847	2.93e-05	0.00226009	DOWN	IPR017441	Protein kinase, ATP binding site	GO:0005524	NA	NA	K08291	G protein-coupled receptor kinase [EC:2.7.11.16]
83	COBS00225	2534.06	-0.786985	0.191345	-4.17847	2.93e-05	0.00226009	DOWN	IPR000961	AGC-kinase, C-terminal	GO:0004674|GO:0005524|GO:0006468	NA	NA	K08291	G protein-coupled receptor kinase [EC:2.7.11.16]
86	COBS00225	2534.06	-0.786985	0.191345	-4.17847	2.93e-05	0.00226009	DOWN	IPR016137	RGS domain	-	NA	NA	K08291	G protein-coupled receptor kinase [EC:2.7.11.16]
87	COBS00225	2534.06	-0.786985	0.191345	-4.17847	2.93e-05	0.00226009	DOWN	IPR000239	GPCR kinase	GO:0004703|GO:0005524|GO:0006468|GO:0007165	NA	NA	K08291	G protein-coupled receptor kinase [EC:2.7.11.16]
89	COBS00225	2534.06	-0.786985	0.191345	-4.17847	2.93e-05	0.00226009	DOWN	IPR044926	RGS, subdomain 2	-	NA	NA	K08291	G protein-coupled receptor kinase [EC:2.7.11.16]
5387	COBS11103	321.511	-0.792543	0.278785	-3.32275	0.00089135	0.0259149	DOWN	-	-		NA	NA	NA	NA
5388	COBS11103	321.511	-0.792543	0.278785	-3.32275	0.00089135	0.0259149	DOWN	IPR003280	Two pore domain potassium channel	GO:0005267|GO:0016020|GO:0071805	PTHR11003	POTASSIUM CHANNEL, SUBFAMILY K	NA	NA
5389	COBS11103	321.511	-0.792543	0.278785	-3.32275	0.00089135	0.0259149	DOWN	-	-		PTHR11003:SF158	BCDNA.GH04802	NA	NA
7542	COBS16829	2279.47	-0.809823	0.261164	-3.09287	0.00198232	0.0437185	DOWN	IPR013087	Zinc finger C2H2-type	-	NA	NA	NA	NA
7543	COBS16829	2279.47	-0.809823	0.261164	-3.09287	0.00198232	0.0437185	DOWN	IPR036236	Zinc finger C2H2 superfamily	-	NA	NA	NA	NA
7548	COBS16829	2279.47	-0.809823	0.261164	-3.09287	0.00198232	0.0437185	DOWN	IPR012934	Zinc finger, AD-type	GO:0005634|GO:0008270	NA	NA	NA	NA
7551	COBS16829	2279.47	-0.809823	0.261164	-3.09287	0.00198232	0.0437185	DOWN	-	-		PTHR23226,PTHR23226:SF214	ZINC FINGER AND SCAN DOMAIN-CONTAINING,ZINC FINGER PROTEIN 32	NA	NA
7552	COBS16829	2279.47	-0.809823	0.261164	-3.09287	0.00198232	0.0437185	DOWN	-	-		PTHR24377,PTHR24377:SF641	IP01015P-RELATED,ZINC FINGER PROTEIN 354B	NA	NA
7556	COBS16829	2279.47	-0.809823	0.261164	-3.09287	0.00198232	0.0437185	DOWN	-	-		PTHR24384,PTHR24384:SF207	FINGER PUTATIVE TRANSCRIPTION FACTOR FAMILY-RELATED,SI:CH211-161M3.1-RELATED	NA	NA
7558	COBS16829	2279.47	-0.809823	0.261164	-3.09287	0.00198232	0.0437185	DOWN	-	-		PTHR24388:SF50,PTHR24388	GROWTH FACTOR-INDEPENDENT 1A TRANSCRIPTION REPRESSOR B-RELATED,ZINC FINGER PROTEIN	NA	NA
7560	COBS16829	2279.47	-0.809823	0.261164	-3.09287	0.00198232	0.0437185	DOWN	-	-		PTHR23226,PTHR23226:SF281	ZINC FINGER AND SCAN DOMAIN-CONTAINING,NEUROTROPHIN RECEPTOR-INTERACTING FACTOR 1-RELATED	NA	NA
3664	COBS07996	2183.75	-0.813973	0.238042	-3.47836	0.000504484	0.01741	DOWN	IPR042056	E3 ubiquitin-protein ligase MIB1/2, zinc finger, ZZ-type	-	NA	NA	K10645	E3 ubiquitin-protein ligase mind-bomb [EC:2.3.2.27]
3665	COBS07996	2183.75	-0.813973	0.238042	-3.47836	0.000504484	0.01741	DOWN	IPR013083	Zinc finger, RING/FYVE/PHD-type	-	NA	NA	K10645	E3 ubiquitin-protein ligase mind-bomb [EC:2.3.2.27]
3666	COBS07996	2183.75	-0.813973	0.238042	-3.47836	0.000504484	0.01741	DOWN	IPR040847	Mind bomb, SH3 repeat domain	-	NA	NA	K10645	E3 ubiquitin-protein ligase mind-bomb [EC:2.3.2.27]
3667	COBS07996	2183.75	-0.813973	0.238042	-3.47836	0.000504484	0.01741	DOWN	IPR036770	Ankyrin repeat-containing domain superfamily	-	NA	NA	K10645	E3 ubiquitin-protein ligase mind-bomb [EC:2.3.2.27]
3669	COBS07996	2183.75	-0.813973	0.238042	-3.47836	0.000504484	0.01741	DOWN	IPR000433	Zinc finger, ZZ-type	GO:0008270	NA	NA	K10645	E3 ubiquitin-protein ligase mind-bomb [EC:2.3.2.27]
3670	COBS07996	2183.75	-0.813973	0.238042	-3.47836	0.000504484	0.01741	DOWN	IPR001841	Zinc finger, RING-type	-	NA	NA	K10645	E3 ubiquitin-protein ligase mind-bomb [EC:2.3.2.27]
3671	COBS07996	2183.75	-0.813973	0.238042	-3.47836	0.000504484	0.01741	DOWN	-	-		PTHR24202:SF52,PTHR24202	E3 UBIQUITIN-PROTEIN LIGASE MIB1,-	K10645	E3 ubiquitin-protein ligase mind-bomb [EC:2.3.2.27]
3673	COBS07996	2183.75	-0.813973	0.238042	-3.47836	0.000504484	0.01741	DOWN	IPR010606	Mib-herc2	GO:0004842|GO:0016567|GO:0046872	NA	NA	K10645	E3 ubiquitin-protein ligase mind-bomb [EC:2.3.2.27]
3675	COBS07996	2183.75	-0.813973	0.238042	-3.47836	0.000504484	0.01741	DOWN	IPR043145	Zinc finger, ZZ-type superfamily	-	NA	NA	K10645	E3 ubiquitin-protein ligase mind-bomb [EC:2.3.2.27]
3677	COBS07996	2183.75	-0.813973	0.238042	-3.47836	0.000504484	0.01741	DOWN	IPR002110	Ankyrin repeat	GO:0005515	NA	NA	K10645	E3 ubiquitin-protein ligase mind-bomb [EC:2.3.2.27]
3679	COBS07996	2183.75	-0.813973	0.238042	-3.47836	0.000504484	0.01741	DOWN	IPR037252	Mib/herc2 domain superfamily	GO:0004842|GO:0046872	NA	NA	K10645	E3 ubiquitin-protein ligase mind-bomb [EC:2.3.2.27]
1110	COBS03028	1570.03	-0.816408	0.322722	-3.0674	0.00215927	0.046037	DOWN	IPR001408	G-protein alpha subunit, group I	GO:0003924|GO:0005525|GO:0007186|GO:0007188|GO:0031683	NA	NA	K04534	guanine nucleotide-binding protein G(o) subunit alpha
1111	COBS03028	1570.03	-0.816408	0.322722	-3.0674	0.00215927	0.046037	DOWN	IPR001019	Guanine nucleotide binding protein (G-protein), alpha subunit	GO:0003924|GO:0007186|GO:0019001|GO:0031683	PTHR10218	GTP-BINDING PROTEIN ALPHA SUBUNIT	K04534	guanine nucleotide-binding protein G(o) subunit alpha
1112	COBS03028	1570.03	-0.816408	0.322722	-3.0674	0.00215927	0.046037	DOWN	IPR001019	Guanine nucleotide binding protein (G-protein), alpha subunit	GO:0003924|GO:0007186|GO:0019001|GO:0031683	PTHR10218	GTP-BINDING PROTEIN ALPHA SUBUNIT	NA	NA
1114	COBS03028	1570.03	-0.816408	0.322722	-3.0674	0.00215927	0.046037	DOWN	IPR011025	G protein alpha subunit, helical insertion	GO:0007165	NA	NA	K04534	guanine nucleotide-binding protein G(o) subunit alpha
1116	COBS03028	1570.03	-0.816408	0.322722	-3.0674	0.00215927	0.046037	DOWN	-	-		PTHR10218:SF335	GUANINE NUCLEOTIDE-BINDING PROTEIN (G PROTEIN), ALPHA-ACTIVATING ACTIVITY POLYPEPTIDE O, A	K04534	guanine nucleotide-binding protein G(o) subunit alpha
1119	COBS03028	1570.03	-0.816408	0.322722	-3.0674	0.00215927	0.046037	DOWN	-	-		PTHR10218:SF331	GUANINE NUCLEOTIDE-BINDING PROTEIN (G PROTEIN), ALPHA-ACTIVATING ACTIVITY POLYPEPTIDE O, B	K04534	guanine nucleotide-binding protein G(o) subunit alpha
1121	COBS03028	1570.03	-0.816408	0.322722	-3.0674	0.00215927	0.046037	DOWN	IPR027417	P-loop containing nucleoside triphosphate hydrolase	-	NA	NA	K04534	guanine nucleotide-binding protein G(o) subunit alpha
1122	COBS03028	1570.03	-0.816408	0.322722	-3.0674	0.00215927	0.046037	DOWN	-	-		PTHR10218:SF335	GUANINE NUCLEOTIDE-BINDING PROTEIN (G PROTEIN), ALPHA-ACTIVATING ACTIVITY POLYPEPTIDE O, A	NA	NA
1123	COBS03028	1570.03	-0.816408	0.322722	-3.0674	0.00215927	0.046037	DOWN	IPR027417	P-loop containing nucleoside triphosphate hydrolase	-	NA	NA	NA	NA
1124	COBS03028	1570.03	-0.816408	0.322722	-3.0674	0.00215927	0.046037	DOWN	IPR011025	G protein alpha subunit, helical insertion	GO:0007165	NA	NA	NA	NA
8399	COBS20208	8.27104	-0.820705	1.19208	-8.43962	3.18e-17	1.61e-14	DOWN	-	-		NA	NA	NA	NA
6188	COBS14262	2660.37	-0.823476	0.274132	-3.50772	0.000451959	0.0160713	DOWN	IPR000159	Ras-associating (RA) domain	GO:0007165	NA	NA	K24478	ankyrin repeat and fibronectin type-III domain-containing protein 1
6189	COBS14262	2660.37	-0.823476	0.274132	-3.50772	0.000451959	0.0160713	DOWN	-	-		NA	NA	K24478	ankyrin repeat and fibronectin type-III domain-containing protein 1
6190	COBS14262	2660.37	-0.823476	0.274132	-3.50772	0.000451959	0.0160713	DOWN	IPR013783	Immunoglobulin-like fold	-	NA	NA	K24478	ankyrin repeat and fibronectin type-III domain-containing protein 1
6191	COBS14262	2660.37	-0.823476	0.274132	-3.50772	0.000451959	0.0160713	DOWN	IPR039269	Ankyrin repeat and fibronectin type-III domain-containing protein 1	-	PTHR21437	UNCHARACTERIZED	K24478	ankyrin repeat and fibronectin type-III domain-containing protein 1
6195	COBS14262	2660.37	-0.823476	0.274132	-3.50772	0.000451959	0.0160713	DOWN	IPR003961	Fibronectin type III	GO:0005515	NA	NA	K24478	ankyrin repeat and fibronectin type-III domain-containing protein 1
6196	COBS14262	2660.37	-0.823476	0.274132	-3.50772	0.000451959	0.0160713	DOWN	IPR036116	Fibronectin type III superfamily	GO:0005515	NA	NA	K24478	ankyrin repeat and fibronectin type-III domain-containing protein 1
6199	COBS14262	2660.37	-0.823476	0.274132	-3.50772	0.000451959	0.0160713	DOWN	IPR036770	Ankyrin repeat-containing domain superfamily	-	NA	NA	K24478	ankyrin repeat and fibronectin type-III domain-containing protein 1
6212	COBS14262	2660.37	-0.823476	0.274132	-3.50772	0.000451959	0.0160713	DOWN	IPR002110	Ankyrin repeat	GO:0005515	NA	NA	K24478	ankyrin repeat and fibronectin type-III domain-containing protein 1
5317	COBS10738	6738.13	-0.832197	0.230521	-3.51074	0.000446869	0.0160633	DOWN	IPR016024	Armadillo-type fold	-	NA	NA	K06672	cohesin loading factor subunit SCC2
5318	COBS10738	6738.13	-0.832197	0.230521	-3.51074	0.000446869	0.0160633	DOWN	-	-		PTHR21704:SF20	NIPPED-B-LIKE PROTEIN	K06672	cohesin loading factor subunit SCC2
5319	COBS10738	6738.13	-0.832197	0.230521	-3.51074	0.000446869	0.0160633	DOWN	IPR033031	Scc2/Nipped-B family	GO:0003682|GO:0010468|GO:0061780	PTHR21704	NIPPED-B-LIKE PROTEIN DELANGIN SCC2-RELATED	K06672	cohesin loading factor subunit SCC2
5320	COBS10738	6738.13	-0.832197	0.230521	-3.51074	0.000446869	0.0160633	DOWN	IPR024986	Sister chromatid cohesion C-terminal domain	-	NA	NA	K06672	cohesin loading factor subunit SCC2
5321	COBS10738	6738.13	-0.832197	0.230521	-3.51074	0.000446869	0.0160633	DOWN	IPR026003	HEAT repeat associated with sister chromatid cohesion protein	-	NA	NA	K06672	cohesin loading factor subunit SCC2
5322	COBS10738	6738.13	-0.832197	0.230521	-3.51074	0.000446869	0.0160633	DOWN	IPR011989	Armadillo-like helical	-	NA	NA	K06672	cohesin loading factor subunit SCC2
2198	COBS05356	9208.86	-0.834778	0.226286	-3.51707	0.00043634	0.0158767	DOWN	IPR041337	Heterogeneous nuclear ribonucleoprotein Q acidic domain	-	NA	NA	NA	NA
2199	COBS05356	9208.86	-0.834778	0.226286	-3.51707	0.00043634	0.0158767	DOWN	IPR035979	RNA-binding domain superfamily	GO:0003676	NA	NA	K13161	heterogeneous nuclear ribonucleoprotein R
2200	COBS05356	9208.86	-0.834778	0.226286	-3.51707	0.00043634	0.0158767	DOWN	IPR012677	Nucleotide-binding alpha-beta plait domain superfamily	-	NA	NA	K13161	heterogeneous nuclear ribonucleoprotein R
2201	COBS05356	9208.86	-0.834778	0.226286	-3.51707	0.00043634	0.0158767	DOWN	IPR006535	HnRNP R/Q splicing factor	-	NA	NA	NA	NA
2206	COBS05356	9208.86	-0.834778	0.226286	-3.51707	0.00043634	0.0158767	DOWN	IPR012677	Nucleotide-binding alpha-beta plait domain superfamily	-	NA	NA	NA	NA
2207	COBS05356	9208.86	-0.834778	0.226286	-3.51707	0.00043634	0.0158767	DOWN	IPR035979	RNA-binding domain superfamily	GO:0003676	NA	NA	NA	NA
2210	COBS05356	9208.86	-0.834778	0.226286	-3.51707	0.00043634	0.0158767	DOWN	IPR000504	RNA recognition motif domain	GO:0003723	NA	NA	NA	NA
2211	COBS05356	9208.86	-0.834778	0.226286	-3.51707	0.00043634	0.0158767	DOWN	-	-		PTHR21245:SF5,PTHR21245	HETEROGENEOUS NUCLEAR RIBONUCLEOPROTEIN R,HETEROGENEOUS NUCLEAR RIBONUCLEOPROTEIN	NA	NA
2212	COBS05356	9208.86	-0.834778	0.226286	-3.51707	0.00043634	0.0158767	DOWN	IPR041337	Heterogeneous nuclear ribonucleoprotein Q acidic domain	-	NA	NA	K13161	heterogeneous nuclear ribonucleoprotein R
2218	COBS05356	9208.86	-0.834778	0.226286	-3.51707	0.00043634	0.0158767	DOWN	-	-		PTHR24012:SF798,PTHR24012	HETEROGENEOUS NUCLEAR RIBONUCLEOPROTEIN Q-LIKE PROTEIN,RNA BINDING PROTEIN	K13161	heterogeneous nuclear ribonucleoprotein R
2220	COBS05356	9208.86	-0.834778	0.226286	-3.51707	0.00043634	0.0158767	DOWN	-	-		PTHR24012,PTHR24012:SF798	RNA BINDING PROTEIN,HETEROGENEOUS NUCLEAR RIBONUCLEOPROTEIN Q-LIKE PROTEIN	K13161	heterogeneous nuclear ribonucleoprotein R
2227	COBS05356	9208.86	-0.834778	0.226286	-3.51707	0.00043634	0.0158767	DOWN	IPR000504	RNA recognition motif domain	GO:0003723	NA	NA	K13161	heterogeneous nuclear ribonucleoprotein R
2229	COBS05356	9208.86	-0.834778	0.226286	-3.51707	0.00043634	0.0158767	DOWN	IPR006535	HnRNP R/Q splicing factor	-	NA	NA	K13161	heterogeneous nuclear ribonucleoprotein R
2132	COBS04929	2573.3	-0.846242	0.226554	-3.8549	0.000115776	0.00646939	DOWN	IPR015659	Proline oxidase family	GO:0004657|GO:0006562	PTHR13914	PROLINE OXIDASE	K00318	proline dehydrogenase [EC:1.5.5.2]
2133	COBS04929	2573.3	-0.846242	0.226554	-3.8549	0.000115776	0.00646939	DOWN	IPR002872	Proline dehydrogenase domain	-	NA	NA	K00318	proline dehydrogenase [EC:1.5.5.2]
2135	COBS04929	2573.3	-0.846242	0.226554	-3.8549	0.000115776	0.00646939	DOWN	-	-		PTHR13914:SF22	PROLINE DEHYDROGENASE 1, MITOCHONDRIAL	NA	NA
2136	COBS04929	2573.3	-0.846242	0.226554	-3.8549	0.000115776	0.00646939	DOWN	IPR029041	FAD-linked oxidoreductase-like	-	NA	NA	K00318	proline dehydrogenase [EC:1.5.5.2]
2141	COBS04929	2573.3	-0.846242	0.226554	-3.8549	0.000115776	0.00646939	DOWN	IPR015659	Proline oxidase family	GO:0004657|GO:0006562	PTHR13914	PROLINE OXIDASE	NA	NA
2142	COBS04929	2573.3	-0.846242	0.226554	-3.8549	0.000115776	0.00646939	DOWN	-	-		PTHR13914:SF22	PROLINE DEHYDROGENASE 1, MITOCHONDRIAL	K00318	proline dehydrogenase [EC:1.5.5.2]
1277	COBS03499	4401.24	-0.854503	0.301904	-3.33445	0.000854673	0.0253742	DOWN	IPR018490	Cyclic nucleotide-binding domain superfamily	-	NA	NA	NA	NA
1278	COBS03499	4401.24	-0.854503	0.301904	-3.33445	0.000854673	0.0253742	DOWN	IPR014710	RmlC-like jelly roll fold	-	NA	NA	NA	NA
1279	COBS03499	4401.24	-0.854503	0.301904	-3.33445	0.000854673	0.0253742	DOWN	IPR035965	PAS domain superfamily	-	NA	NA	NA	NA
1280	COBS03499	4401.24	-0.854503	0.301904	-3.33445	0.000854673	0.0253742	DOWN	IPR003938	Potassium channel, voltage-dependent, EAG/ELK/ERG	GO:0005249|GO:0006813|GO:0016020	NA	NA	NA	NA
1282	COBS03499	4401.24	-0.854503	0.301904	-3.33445	0.000854673	0.0253742	DOWN	IPR005821	Ion transport domain	GO:0005216|GO:0006811|GO:0016020|GO:0055085	NA	NA	NA	NA
1284	COBS03499	4401.24	-0.854503	0.301904	-3.33445	0.000854673	0.0253742	DOWN	IPR000595	Cyclic nucleotide-binding domain	-	NA	NA	NA	NA
1286	COBS03499	4401.24	-0.854503	0.301904	-3.33445	0.000854673	0.0253742	DOWN	IPR000014	PAS domain	-	NA	NA	NA	NA
1290	COBS03499	4401.24	-0.854503	0.301904	-3.33445	0.000854673	0.0253742	DOWN	-	-		PTHR10217,PTHR10217:SF635	VOLTAGE AND LIGAND GATED POTASSIUM CHANNEL,POTASSIUM VOLTAGE-GATED CHANNEL SUBFAMILY H MEMBER 6	K04905	potassium voltage-gated channel Eag-related subfamily H member 2
1292	COBS03499	4401.24	-0.854503	0.301904	-3.33445	0.000854673	0.0253742	DOWN	IPR003967	Potassium channel, voltage-dependent, ERG	GO:0005249|GO:0006813|GO:0016020	NA	NA	NA	NA
1300	COBS03499	4401.24	-0.854503	0.301904	-3.33445	0.000854673	0.0253742	DOWN	IPR018490	Cyclic nucleotide-binding domain superfamily	-	NA	NA	K04905	potassium voltage-gated channel Eag-related subfamily H member 2
1301	COBS03499	4401.24	-0.854503	0.301904	-3.33445	0.000854673	0.0253742	DOWN	IPR000595	Cyclic nucleotide-binding domain	-	NA	NA	K04905	potassium voltage-gated channel Eag-related subfamily H member 2
1302	COBS03499	4401.24	-0.854503	0.301904	-3.33445	0.000854673	0.0253742	DOWN	-	-		PTHR10217,PTHR10217:SF635	VOLTAGE AND LIGAND GATED POTASSIUM CHANNEL,POTASSIUM VOLTAGE-GATED CHANNEL SUBFAMILY H MEMBER 6	NA	NA
1303	COBS03499	4401.24	-0.854503	0.301904	-3.33445	0.000854673	0.0253742	DOWN	IPR003938	Potassium channel, voltage-dependent, EAG/ELK/ERG	GO:0005249|GO:0006813|GO:0016020	NA	NA	K04905	potassium voltage-gated channel Eag-related subfamily H member 2
1311	COBS03499	4401.24	-0.854503	0.301904	-3.33445	0.000854673	0.0253742	DOWN	-	-		PTHR10217:SF635,PTHR10217	POTASSIUM VOLTAGE-GATED CHANNEL SUBFAMILY H MEMBER 6,VOLTAGE AND LIGAND GATED POTASSIUM CHANNEL	NA	NA
[truncated: 907 more rows]

## Sheet: 3-Worker
	target_id	baseMean	log2FoldChange	lfcSE	stat	pvalue	padj	DEG	interpro_id	domain_description	GO_id	PANTHER	description_PANTHER	KO	desciption_KEGG
[truncated: 260 more rows]

## Sheet: 4-Queen
	target_id	baseMean	log2FoldChange	lfcSE	stat	pvalue	padj	DEG	interpro_id	domain_description	GO_id	PANTHER	description_PANTHER	KO	desciption_KEGG
[truncated: 642 more rows]
