# Supplementary material for: Metabolic plasticity supports a flexible nutritional symbiosis in Cardiocondyla ants
Source: Research Square preprint supplement (doi:10.21203/rs.3.rs-7898267/v1), 2025-11-10
Supplement: Supplementary file 5 [file Table-S4-STAR-Counts.xlsx]

## Sheet: Table-S4-STAR-Counts
target_id	JP2011_1_26_Q	JP2011_1_31_L	JP2011_1_31_Q	JP2011_1_31_W	JP2011_2_31_P	JP2011_2_31_Q	JP2011_2_31_W	JP2011_6_26_W	JP2011_6_31_P	JP2011_6_31_Q	JP2011_6_31_W	JP2011_1_26_L	JP2011_1_26_P	JP2011_1_26_W	JP2011_1_31_P	JP2011_2_26_L	JP2011_2_26_P	JP2011_2_26_Q	JP2011_2_26_W	JP2011_2_31_L	JP2011_6_26_L	JP2011_6_26_P	JP2011_6_26_Q	JP2011_6_31_L
COBS00002	0	159	61	202	262	35	209	174	213	171	179	194	754	312	341	161	774	254	329	215	264	931	266	226
COBS00003	1140	1078	752	479	851	320	1001	823	1189	1142	873	739	1714	712	784	646	1556	2366	887	772	875	1842	940	981
COBS00004	250	1286	407	474	337	247	748	821	1027	989	656	838	1174	787	426	1286	1200	1612	839	799	1222	1707	1569	1305
COBS00005	173	255	138	229	319	113	407	375	256	402	276	442	1300	778	997	581	1519	1784	997	710	902	1670	1429	724
COBS00006	1057	1059	506	1140	451	350	1480	1517	841	3575	1463	1305	1818	1873	1131	2127	1823	2639	2339	981	1422	2220	8634	1986
COBS00007	1	186	170	155	173	112	203	166	150	278	171	97	329	206	239	170	381	1659	402	152	130	317	543	188
COBS00008	62	51	59	20	40	60	38	18	160	76	13	10	33	17	115	11	37	352	36	20	25	97	117	21
COBS00009	397	279	279	700	1063	166	458	175	767	423	1101	226	2308	1892	1120	206	3388	1652	2395	249	310	2541	813	379
COBS00010	1	109	300	88	120	122	203	138	76	129	95	169	484	235	244	150	553	406	314	225	288	567	273	268
COBS00011	1	7	8	104	140	9	42	73	0	48	125	12	236	163	113	7	331	22	261	26	18	171	70	18
COBS00013	0	0	8	123	408	6	57	49	718	88	90	6	677	578	218	1	2047	51	590	4	6	458	42	5
COBS00014	567	5	635	1838	37	297	5484	6452	27	1561	2014	6	25	1207	17	2	33	4236	771	13	5	39	3227	7
COBS00015	0	0	12	0	0	3	0	0	0	0	1	0	1	0	1	0	1	0	2	0	0	0	0	0
COBS00016	0	2	1	4	2	6	7	12	0	4	0	0	1	2	7	3	5	25	8	0	0	4	13	3
COBS00020	1	0	57	1	4	25	3	3	0	0	0	4	3	20	12	2	2	5	4	14	2	1	1	0
COBS00021	461	426	110	50	116	28	126	71	200	117	108	139	123	71	105	147	176	214	96	236	216	168	126	170
COBS00023	69	194	70	285	472	41	291	259	95	231	484	89	753	694	454	92	1207	330	788	231	173	874	373	147
COBS00024	271	671	604	851	1181	270	1510	1281	1769	1377	1422	357	1403	669	1095	353	1527	1635	1017	480	508	1760	1052	516
COBS00025	1887	1164	1097	416	461	625	691	572	1203	905	696	604	2395	837	1182	645	2100	7868	1098	951	1144	2834	2958	1110
COBS00026	1387	2801	1643	379	751	718	820	750	2702	1517	553	1974	1619	494	1473	1556	1495	5845	534	2228	2244	2254	2001	2237
COBS00027	0	227	145	161	345	38	260	232	167	260	161	188	815	328	375	184	906	537	417	257	290	820	316	265
COBS00028	1	251	139	158	759	89	169	190	1237	231	113	211	1431	179	724	188	1602	810	220	283	286	1927	276	216
COBS00029	4787	3936	3018	5773	3123	1560	7009	5816	5675	8932	10473	2049	8242	8179	4417	2860	7522	7508	11791	2818	3170	7792	10055	3102
COBS00030	0	73	0	7	6	0	21	0	0	30	43	0	0	3	0	1	0	1	4	0	0	1	1	0
COBS00032	511	555	313	233	292	151	224	442	362	428	195	853	705	626	372	316	629	1601	319	355	377	625	523	447
COBS00033	1347	712	575	73	528	364	100	119	837	263	160	390	427	107	1061	422	574	3679	206	929	941	816	1016	843
COBS00034	0	0	1	2	23	4	1	0	0	1	0	19	10	5	45	26	18	17	6	41	39	10	12	24
COBS00035	541	130	39	123	161	52	60	81	145	135	79	41	197	131	158	55	235	237	162	96	103	345	204	111
COBS00036	617	613	469	245	569	189	582	661	1689	628	582	315	802	362	398	317	824	955	404	275	352	957	458	403
COBS00037	1	113	62	83	84	17	140	115	61	180	69	184	397	248	159	217	476	367	265	165	226	518	439	284
COBS00038	0	525	466	437	683	284	957	959	680	980	780	321	940	509	586	266	997	1298	773	401	440	1157	931	419
COBS00039	2073	2680	1219	2116	1772	710	2767	2930	2187	2664	2743	2501	3307	2514	2214	2720	3606	4879	3210	2690	3024	3257	3645	2768
COBS00040	556	1493	653	560	680	338	720	762	1038	730	589	970	1275	594	782	814	1343	2593	815	1078	995	1532	1147	1094
COBS00041	276	370	1123	184	308	387	635	366	271	455	300	447	843	521	660	279	838	1655	610	664	553	696	726	430
COBS00042	0	237	307	139	293	159	326	330	547	363	292	290	888	327	505	265	872	1733	456	388	436	998	548	472
COBS00043	729	700	518	413	843	353	554	535	712	669	570	1208	2775	1035	1584	980	2841	3572	1269	1655	1328	3361	2112	1911
COBS00044	2	369	378	497	791	197	579	125	324	579	812	274	1471	1085	688	112	2455	3384	1265	594	327	1428	1664	373
COBS00045	170	213	111	102	94	57	383	327	64	353	284	325	517	473	285	418	523	671	615	489	659	553	861	456
COBS00046	279	1468	1028	1849	3941	486	1782	1698	1229	1669	1920	1182	4314	2596	2238	1093	6068	3034	3754	1296	1164	3962	2067	1201
COBS00047	0	599	249	243	274	128	349	430	207	410	372	750	1393	704	632	813	1390	1959	888	782	901	1837	1211	942
COBS00048	0	5	4	25	23	0	31	3	0	22	7	4	17	20	18	4	23	14	36	10	9	36	31	11
COBS00049	0	54	62	298	87	27	463	377	42	244	380	52	179	376	163	50	256	401	580	47	61	272	451	50
COBS00050	156	1512	743	980	1057	411	1058	969	1141	1057	1224	1538	3206	2110	2014	1528	3932	4040	2568	1993	2426	3675	2669	2553
COBS00051	1221	1137	762	926	1775	479	962	910	1686	1173	763	1042	3386	1482	2664	986	3363	3697	1959	1422	1477	3809	2414	1653
COBS00052	4766	9068	2960	2035	2877	1701	3585	2919	6869	3729	2773	6004	6815	3223	4871	6899	7524	13187	4287	6395	8463	8231	7471	10167
COBS00053	561	1153	213	805	969	178	580	687	2256	602	552	1256	2755	904	2514	3796	2796	1197	1420	2174	2595	3967	1653	4595
COBS00054	0	32	15	20	7	2	14	17	1	20	19	20	24	25	22	13	28	38	27	21	25	16	28	5
COBS00055	0	1	3	19	1	0	9	0	3	6	6	0	1	2	0	0	0	0	2	0	2	1	2	0
COBS00056	797	467	249	348	298	111	812	678	376	1383	796	210	437	416	237	228	400	689	569	151	190	495	1180	214
COBS00057	249	439	236	485	427	184	445	610	463	639	547	481	859	576	681	416	1135	1486	772	632	615	1114	1183	749
COBS00058	3	47	11	12	15	5	10	6	27	24	2	7	13	6	12	0	18	13	9	5	5	27	7	7
COBS00059	2542	2735	5231	742	1623	2473	1174	1141	3897	1538	813	2730	3533	1122	2998	2768	3680	8064	1391	2992	4476	4783	4508	5772
COBS00060	0	4	4	18	38	9	22	19	73	20	30	84	218	80	118	118	226	291	134	134	187	276	172	186
COBS00061	526	872	739	477	289	798	1002	693	231	677	548	449	526	558	290	669	656	1039	848	710	760	565	1010	701
COBS00062	615	2344	622	532	1223	171	960	856	2613	1247	818	1279	1971	739	1953	1186	2006	2843	1062	1627	2026	2754	1739	2034
COBS00063	204	921	421	306	637	215	547	545	867	480	441	705	1848	515	866	633	1573	2061	648	716	944	1977	855	943
COBS00064	16	666	97	172	250	124	257	230	282	228	192	911	1113	528	423	1175	1216	1222	545	683	624	1516	773	955
COBS00065	0	1144	323	348	299	198	576	579	587	540	406	958	1023	652	754	1248	994	1850	758	860	1216	1521	1152	1238
COBS00066	0	2	0	2	14	1	1	2	247	19	5	9	19	1	111	8	25	17	21	20	20	188	10	13
COBS00067	0	0	29	8	1	11	3	3	165	15	0	9	7	6	63	2	0	88	7	12	1	165	44	2
COBS00069	4	7	32	14	7	6	4	6	31	17	0	15	22	2	28	9	21	89	8	35	9	39	34	8
COBS00070	6438	4206	4279	2979	4908	2075	3765	3341	5616	4121	3697	1781	5716	2792	4612	1812	6405	15185	3853	3038	2583	6755	5878	2799
COBS00071	1088	1399	1202	383	586	613	489	556	1044	933	304	1091	1841	627	986	766	1799	5826	773	1284	1185	2173	1821	1445
COBS00072	0	9	18	29	44	4	39	15	159	28	32	48	217	35	89	41	384	27	51	37	37	410	36	178
COBS00073	125	717	312	850	45	173	1648	628	225	1070	630	576	522	493	100	1281	600	854	324	792	1195	306	1043	1077
COBS00074	185	226	152	320	201	88	311	283	115	405	366	280	520	647	456	512	652	1459	929	495	568	596	1252	439
COBS00075	1795	13398	2136	4429	825	1152	9784	9657	1131	8958	6613	7617	1225	5146	849	14592	1632	9202	5633	6176	9602	1911	13786	17323
COBS00076	167	592	39	114	32	42	305	158	6	157	212	366	81	385	40	651	109	637	377	340	501	118	958	982
COBS00077	905	6996	1199	2409	467	675	5235	5116	356	4687	4349	5594	924	3179	483	9254	1201	4823	3778	2517	6198	1255	5426	8449
COBS00078	160	9506	460	345	36	222	673	872	79	884	423	4458	75	639	124	12860	103	2205	493	6700	40765	117	1310	6794
COBS00079	3281	949	2255	2602	19	1057	6924	5051	91	14952	3708	223	77	2566	17	235	162	9222	2917	79	198	49	12779	161
COBS00080	4314	3344	2938	3447	5362	2327	4303	3814	4852	4787	3704	2532	9544	4759	6996	2415	8728	15527	6670	5040	4036	9191	8261	4081
COBS00082	1931	2830	1531	2169	1280	732	4067	3298	2880	9025	4296	1006	1848	1805	688	1329	1954	1932	2294	852	1175	2321	4927	1319
COBS00083	860	1572	708	1366	675	391	1868	1771	1551	3875	2065	857	1809	1351	696	1281	1754	1447	2085	828	1109	2497	4371	1495
COBS00084	1494	2246	940	773	938	403	1455	1411	1457	1441	1424	1466	2606	1390	1071	1914	2656	3601	1670	1312	2016	2825	1868	1946
COBS00085	2401	942	360	3016	79	214	25	23	259	108	4	1792	2440	4294	928	149	110	1196	61	248	365	213	183	357
COBS00086	0	0	4	4	10	0	0	2	118	9	0	9	9	0	50	8	7	26	1	16	27	112	6	19
COBS00087	0	48	62	49	50	10	99	86	23	76	30	121	267	182	129	151	257	207	130	65	191	314	204	201
COBS00088	188	612	302	400	630	203	480	484	648	623	548	580	1570	811	830	678	1648	2138	1016	701	633	1664	1263	905
COBS00089	331	274	54	395	415	104	103	133	38	119	122	116	601	265	1034	154	682	631	463	353	264	773	685	262
COBS00090	0	4	12	0	15	0	0	5	0	2	0	1	6	2	4	2	6	6	5	5	3	11	7	2
COBS00091	0	9	11	35	93	0	20	12	11	9	16	31	103	25	146	36	87	69	52	54	41	97	65	35
COBS00092	2	12	8	0	7	0	3	2	0	2	13	0	0	2	1	3	0	2	0	0	0	3	2	1
COBS00093	3247	1756	831	2430	3171	795	1643	1889	1625	1753	1570	813	3624	1744	4156	776	3651	4640	2586	2290	1529	2927	3312	1434
COBS00094	1	13	1	1	3	0	1	0	0	0	5	0	2	1	0	1	0	4	1	0	0	0	2	0
COBS00096	2360	2037	1117	1567	2886	732	2118	1691	2362	2130	2099	836	2248	1038	2040	778	1928	2990	1432	1281	965	2124	2040	809
COBS00098	1	70	9	30	56	7	18	7	27	13	34	47	45	24	33	49	58	17	49	65	43	51	25	31
COBS00099	0	69	25	111	178	25	93	94	68	125	122	70	223	88	211	58	167	214	125	92	96	185	156	61
COBS00101	8746	8052	4365	6040	12060	2932	7643	8138	8175	8133	8280	3248	10238	4625	8349	3123	9740	13083	6520	5414	4325	10120	8109	3847
COBS00102	1	788	428	316	323	236	443	378	511	450	319	575	2133	692	1066	715	2078	4873	1105	968	970	2810	2004	971
COBS00103	2	1	2	0	11	3	13	4	74	18	21	0	14	12	14	1	13	19	15	5	4	22	24	10
COBS00104	0	10	1	7	5	0	36	15	0	16	19	1	12	12	4	1	20	33	18	10	1	11	30	1
COBS00105	10	156	129	191	345	75	155	181	330	219	209	184	393	113	369	79	420	377	205	307	130	498	253	97
COBS00106	259	51	41	64	145	25	100	108	92	84	81	283	229	72	211	84	240	338	163	298	70	231	214	92
COBS00107	2474	3078	1815	1767	2951	1233	2073	2421	3459	2655	2076	2123	4706	1855	3083	1804	5394	8026	2556	3054	2634	5408	3509	2077
COBS00108	1482	815	830	3049	3136	509	2754	2583	1515	2331	3435	527	1348	1418	2345	517	1719	2042	2600	1189	626	1488	2311	742
COBS00109	299	1	47	124	15	106	624	1917	40	926	882	13	15	6140	43	6	19	1312	1635	20	9	17	5493	6
COBS00110	159	3	20	38	60	17	33	26	1	36	47	4	8	35	27	3	16	95	13	13	2	6	42	10
COBS00111	0	13	11	37	64	5	41	17	0	21	15	10	12	23	32	4	15	33	11	13	3	8	19	10
COBS00113	0	6	1	34	36	0	28	5	1	8	11	2	10	12	32	1	10	17	16	10	4	8	22	7
COBS00114	0	7	6	56	43	2	12	39	6	14	90	12	15	15	69	4	18	34	41	20	8	19	36	10
COBS00115	1038	764	434	421	508	343	638	546	648	690	572	512	1233	625	585	493	1288	1592	750	549	727	1390	1169	673
COBS00116	3044	3055	2702	2669	4453	1346	3991	3878	6396	4037	3774	2043	6633	3397	4435	1927	7069	9891	4408	2391	2561	7591	4665	2849
COBS00117	1109	1315	855	1140	1178	389	1709	1514	1530	1828	1826	736	2205	1580	1202	713	2346	3158	1937	937	1053	2293	1731	990
COBS00118	312	1416	522	539	864	325	606	625	1972	764	566	4122	5851	2169	4164	5449	6708	6425	2766	3965	6334	9890	4557	7691
COBS00119	273	158	141	173	326	93	191	196	183	203	85	440	661	270	333	516	627	870	324	348	521	750	435	696
COBS00120	5542	625	664	745	259	346	364	329	531	551	311	285	573	631	226	256	423	781	352	188	314	540	383	368
COBS00121	125	693	494	489	4480	245	378	340	2438	625	507	563	5766	876	4679	630	6014	2067	1317	1391	1463	7144	1201	1253
COBS00122	615	361	384	451	610	211	580	558	1046	590	538	200	954	439	605	256	1043	1314	567	252	287	1052	688	347
COBS00123	11888	15493	6798	8482	13132	4102	10213	9110	25622	11396	10595	6577	18807	8002	13195	7773	19095	18091	10657	7464	7783	21702	11371	9306
COBS00124	158	3128	616	1699	1038	701	1558	1298	1132	1774	1298	4682	6869	6918	4822	7208	8040	11959	9730	4896	5894	6857	10504	7310
COBS00125	1	425	237	500	390	99	558	575	317	510	685	257	926	885	547	222	1393	1020	1132	327	320	1220	866	309
COBS00126	524	251	174	103	233	115	223	224	393	213	187	170	619	275	439	141	663	920	307	241	301	852	370	307
COBS00127	2	999	361	549	606	309	963	853	565	1104	975	728	1598	981	816	592	1819	2153	1020	985	957	1825	1486	760
COBS00128	231	143	84	60	225	16	113	66	2	126	69	108	280	95	144	79	172	176	139	119	82	330	94	73
COBS00129	673	1455	611	1038	2552	300	1327	1438	1449	1256	1478	1211	7561	1771	3113	1015	5693	2908	2237	2140	1664	8278	2016	1611
COBS00130	2353	4493	1962	1674	2569	810	2786	2268	3579	3348	2501	2773	5402	2314	2369	3115	4592	6354	2907	2532	3146	5595	3901	4194
COBS00131	1	83	50	45	102	9	55	60	727	112	96	36	115	56	399	41	125	82	115	53	52	757	76	76
COBS00132	3281	5653	1691	4176	2573	1075	5649	4702	3524	6027	6872	2339	5779	4508	2970	2922	5431	5276	6868	3321	4030	6083	7105	3593
COBS00133	3354	4048	2616	2094	2987	1207	3346	3104	2881	3929	3132	2203	5699	3223	4514	2047	6071	12468	4425	3797	3460	5803	5925	3064
COBS00134	372	452	189	414	505	131	630	653	499	790	462	403	717	417	385	359	688	621	465	347	397	913	609	354
COBS00135	1071	1618	1174	2252	2990	495	2331	2498	2820	2646	2247	764	2720	1636	1829	964	3550	2395	2926	1115	1308	2845	3082	1539
COBS00137	0	11	9	113	51	7	59	80	0	31	140	4	24	67	66	2	57	31	121	11	6	18	44	2
COBS00138	0	0	22	112	86	6	68	49	0	45	94	3	25	56	64	4	44	34	157	5	3	21	50	0
COBS00139	0	31	38	574	218	35	244	304	74	126	415	14	174	453	293	11	314	128	760	33	25	118	250	21
COBS00140	3	353	408	5728	3564	302	3800	4303	1159	2479	6333	267	2012	5052	2917	218	3748	1418	8216	634	355	1667	2989	285
COBS00141	2	347	227	109	288	104	255	287	244	399	233	137	549	237	317	152	598	1104	298	229	247	699	459	261
COBS00143	0	0	0	2	12	12	0	7	0	0	0	1	0	0	8	1	0	12	2	2	4	4	0	2
COBS00144	0	7	10	4	27	24	0	4	0	13	0	2	16	6	43	0	28	43	2	1	1	11	16	4
COBS00146	2	0	1	0	5	0	4	0	15	2	1	1	0	0	6	1	0	6	6	0	0	1	4	0
COBS00147	4031	2838	1967	1144	2968	1179	1418	1196	1828	1564	1364	1313	2544	890	2423	1485	2474	8287	1202	1835	1726	2636	2734	1732
COBS00150	0	0	12	21	3	2	25	7	0	18	18	2	6	7	16	2	23	25	16	3	1	18	49	2
COBS00151	0	0	20	35	50	7	91	83	5	48	45	0	15	5	16	0	34	30	19	3	1	32	33	1
COBS00152	201	26	112	348	766	75	442	452	307	353	334	10	98	69	141	4	211	171	179	21	10	311	283	7
COBS00153	107	94	102	55	130	31	106	124	0	158	97	112	270	128	156	95	298	430	133	188	117	334	223	130
COBS00154	1034	125	867	52	130	518	70	64	45	190	88	52	148	74	99	31	166	3763	115	81	57	168	746	143
COBS00155	53	172	186	117	169	55	211	194	139	275	186	93	306	141	139	147	229	368	177	81	167	330	227	168
COBS00156	0	307	19	708	2260	6	43	19	1790	69	36	284	4769	2790	1505	177	10932	96	5186	191	46	5507	77	41
COBS00157	135	238	1473	79	100	544	158	280	209	144	107	193	248	117	133	185	225	497	126	178	256	376	884	226
COBS00160	3197	3850	3295	4391	6077	2556	4166	4152	4401	6000	4452	3381	11520	5727	10207	4843	10988	21415	9314	6676	5973	12789	13008	5647
COBS00161	198	463	229	338	538	169	525	414	693	450	383	338	994	430	531	360	1048	1032	606	488	460	1350	773	529
COBS00162	434	714	1005	2931	4741	616	2909	3037	1886	2452	4033	513	3712	2814	3357	510	4806	5697	4815	1130	777	3177	3434	767
COBS00163	0	7	12	18	0	1	54	56	0	26	33	0	0	12	4	0	0	11	9	4	0	2	15	0
COBS00164	2	6	103	275	9	39	501	621	1766	237	345	11	44	136	448	1	31	201	212	55	9	864	277	9
COBS00165	511	197	450	3111	1774	284	2782	2955	272	1642	4591	102	1546	3444	1797	127	2436	1376	5634	329	219	1254	2754	157
COBS00166	1403	1293	467	500	486	196	705	730	4438	900	626	886	2606	3296	869	1114	4435	1547	5694	1095	1271	4160	2443	858
COBS00167	0	2	0	2	7	0	5	2	0	3	17	1	8	7	2	1	5	8	13	8	0	13	2	0
COBS00168	4	119	23	59	27	12	188	143	0	137	122	62	26	120	16	54	32	214	165	45	43	61	156	44
COBS00169	306	1735	260	312	300	225	745	476	586	682	384	1418	1308	617	578	1766	1177	1718	582	955	1350	1846	1326	1185
COBS00170	2	357	165	190	263	62	201	161	363	172	198	413	1102	389	551	361	1067	1100	437	458	502	1329	560	435
COBS00171	1750	17684	2372	2930	1465	1264	4665	4634	3132	5176	4631	10372	6102	4805	2119	23574	6186	9149	5438	11749	15924	7217	8598	18581
COBS00172	3	286	143	162	212	79	288	217	183	183	154	444	932	339	398	542	1114	820	429	432	522	1369	617	605
COBS00173	0	374	243	163	181	147	205	322	301	324	218	293	792	430	391	341	921	1861	481	468	448	1015	836	430
COBS00174	489	1624	793	1297	871	321	3144	2781	1038	2248	2349	1075	2373	1408	1300	1676	2369	3552	2095	912	984	3020	2752	1358
COBS00175	4	48	60	48	51	31	62	49	110	48	79	35	53	27	143	16	87	176	58	18	22	228	87	24
COBS00176	675	462	431	1583	1600	297	1786	1670	989	1223	2221	198	1360	1673	1124	203	2046	1120	2458	494	432	1470	1321	351
COBS00178	0	251	127	2015	2279	169	1259	1317	1271	1062	2178	250	1901	1729	1713	253	2844	411	2944	568	485	1933	1298	354
COBS00180	0	0	12	98	111	0	39	36	0	9	25	4	13	19	95	5	20	14	56	11	5	4	33	1
COBS00181	0	3	31	313	449	19	97	141	0	98	214	16	52	58	244	2	96	46	174	34	5	47	110	6
COBS00182	0	3	5	64	80	4	37	10	0	10	23	6	31	48	92	1	23	18	63	14	6	39	60	1
COBS00183	0	1	1	16	4	2	4	5	0	0	1	0	2	1	0	0	0	8	4	0	0	0	3	0
COBS00184	1	0	5	145	128	9	33	50	0	29	49	15	15	18	115	3	41	26	80	23	7	32	71	4
COBS00185	0	0	0	14	17	0	5	4	0	0	0	2	8	18	18	1	26	3	24	12	4	16	15	0
COBS00188	1860	1202	1395	509	836	554	725	721	1732	1049	749	470	1124	637	740	478	1161	4938	721	578	642	1338	1587	704
COBS00189	1	56	11	19	54	32	25	43	109	26	32	32	101	64	101	82	109	83	55	65	82	130	72	58
COBS00190	2145	3531	1420	1367	2084	695	1686	1576	2586	1773	1794	1574	3814	1582	2433	1856	3861	6668	2282	2124	2827	4079	3424	2253
COBS00191	0	25	7	19	52	18	36	31	50	37	8	25	76	50	93	20	112	58	46	40	55	67	36	32
COBS00192	697	4361	868	807	482	316	1452	1435	1032	1589	1183	3006	1920	869	608	4114	1413	3112	1111	2343	5289	2325	2346	4828
COBS00193	434	567	370	1807	3356	288	2097	1844	1694	1691	2663	329	2860	1743	2828	316	3828	1273	2812	995	705	2842	2059	540
COBS00196	0	1	9	7	10	1	13	1	4	3	0	0	0	5	1	0	0	0	1	0	1	1	2	0
COBS00197	2	2	0	9	7	7	22	37	0	10	43	8	5	10	7	9	22	11	49	12	29	10	27	1
COBS00198	0	4	0	0	3	1	0	5	0	5	14	0	2	2	6	0	1	3	4	0	0	7	5	0
COBS00199	4344	4113	2920	2771	6296	1948	3233	2621	8795	4262	3137	2267	13888	3210	8918	2494	11242	11805	5337	3920	4025	14656	6310	3765
COBS00201	0	0	0	11	0	2	0	0	0	0	0	25	10	6	13	20	14	14	10	24	11	8	4	14
COBS00203	1	128	48	60	99	43	91	126	126	67	36	148	150	71	140	135	183	366	63	150	155	276	194	190
COBS00204	3063	3093	2112	2579	3317	1098	3026	2975	3259	3360	3398	2034	4894	2715	3271	1733	5191	7336	3784	2490	2310	5466	4387	2057
COBS00205	199	504	395	253	316	213	313	237	433	366	269	327	772	477	626	310	762	2574	379	489	532	1098	1058	606
COBS00206	835	176	203	219	286	70	271	210	436	322	253	73	215	130	100	95	221	297	218	78	118	216	182	102
COBS00207	1368	6871	1433	4110	1575	1310	4049	3346	1581	4379	4620	5160	6992	9575	4176	9536	8772	13473	12420	6077	8189	7742	15554	10360
COBS00208	4306	4739	2020	3892	1557	1220	6181	6727	2874	7648	5812	2459	4744	5542	2345	3356	6046	9975	6848	5335	7085	6216	14634	4779
COBS00209	1	13	1	4	15	1	6	1	0	7	6	9	36	21	34	8	32	34	13	37	15	24	15	15
COBS00210	0	37	26	68	40	21	50	68	734	95	59	39	142	120	378	40	154	208	174	81	112	1080	232	64
COBS00211	609	687	581	253	630	349	473	376	816	624	410	454	1023	438	721	380	1223	1681	444	642	586	1308	793	666
COBS00212	228	239	153	80	396	67	227	245	548	262	181	275	1039	319	505	324	973	1133	379	337	387	1002	523	361
COBS00213	199	139	22	94	281	13	66	55	1859	94	143	49	241	43	515	33	227	94	69	79	66	1119	67	98
COBS00215	0	35	28	36	128	11	28	55	258	25	43	30	214	35	361	37	147	91	58	55	59	536	59	75
COBS00216	7	10	1	11	6	3	4	0	0	2	9	30	42	130	94	1	7	10	11	5	3	189	16	6
COBS00217	0	0	14	1	3	5	11	4	2	22	17	0	9	14	10	0	8	26	34	0	0	9	37	0
COBS00218	0	16	23	3	12	18	6	7	65	36	2	34	17	3	20	6	75	104	12	49	4	27	71	6
COBS00219	0	269	99	220	253	83	198	192	231	281	204	223	715	278	441	229	827	898	335	338	345	924	628	441
COBS00220	466	66	712	0	17	273	0	2	33	334	24	0	1	5	15	0	2	2712	13	0	0	6	612	77
COBS00221	275	655	281	1508	2881	141	2091	1958	1352	1299	2293	280	2697	1740	2328	359	3568	830	2370	1066	812	2993	1700	554
COBS00222	1	22	24	38	28	57	39	53	1	39	52	4	63	34	48	6	65	13	68	21	17	75	25	14
COBS00223	320	20	26	74	61	14	33	122	68	64	96	4	60	87	39	2	56	46	150	7	5	72	77	0
COBS00224	1	12	9	92	13	31	191	172	8	88	140	8	39	88	16	4	18	77	156	13	2	34	153	4
COBS00225	1689	1971	1322	2249	4657	681	2365	2557	4961	2389	2940	967	4847	2087	4929	845	5180	3964	3229	2233	1692	5349	3078	1581
COBS00226	2	210	158	270	872	93	283	403	564	396	410	180	1231	473	981	191	1366	636	716	492	382	1211	533	336
COBS00227	1205	2143	659	1502	1754	475	1438	1590	1631	1355	1731	1035	4463	2567	2655	1234	5079	4664	3163	3293	2336	5310	3280	1838
COBS00228	274	1119	338	273	208	221	416	449	405	529	311	1274	1396	845	888	1438	1688	2073	987	1274	1665	2045	1865	2159
COBS00229	476	877	597	471	1273	365	659	623	1927	580	707	337	2033	340	953	263	1595	1510	604	497	346	2225	787	319
COBS00230	2484	3091	1262	1666	1671	802	2543	1975	1947	2190	1885	1412	2671	1845	1749	1925	2590	3315	2217	1747	2125	2662	2309	1716
COBS00231	0	8	0	0	5	1	5	5	0	11	13	2	4	3	2	2	6	8	8	6	4	11	4	4
COBS00232	619	716	320	254	259	149	356	325	245	591	403	396	565	421	280	692	730	1110	476	725	1062	825	868	1347
COBS00233	0	167	93	61	100	66	105	158	30	223	149	189	302	152	134	247	250	534	200	128	194	319	306	210
COBS00234	369	1798	544	1516	1374	524	2049	1703	901	1681	1830	1768	3367	2270	2356	2500	3637	4664	3314	2641	2523	3880	3823	2597
COBS00235	3693	3258	3653	15566	12312	2205	16721	17305	4940	12146	19704	1674	7120	10022	8311	1349	10600	9360	15702	4140	2099	6742	12941	1500
COBS00236	0	553	42	330	499	23	213	123	2825	198	245	84	1245	329	2327	2310	1011	180	645	9495	5374	1933	270	10177
COBS00237	0	213	196	173	394	41	414	413	341	319	415	125	284	169	265	92	290	253	237	120	158	338	190	102
COBS00238	1260	1272	716	1140	1444	274	1122	978	2397	1195	1271	936	2466	1179	2347	1033	2831	2466	1626	1344	1599	3619	2137	1429
COBS00239	20968	4016	34464	1259	3108	9471	3648	8124	5157	2360	1941	5653	5982	1922	3754	2265	5766	5742	2929	2927	2725	7075	8323	2337
COBS00240	3	38	33	49	57	17	53	65	80	68	70	7	90	64	48	9	95	39	93	25	30	47	51	21
COBS00241	1	352	224	164	509	137	247	158	269	253	247	191	871	346	583	157	834	790	321	381	384	719	331	382
COBS00242	6072	7926	2857	3270	5552	1051	5392	4455	13043	4612	6176	1216	3184	1795	2526	1794	3552	3959	2411	1875	2360	3681	2450	2224
COBS00243	0	157	64	165	275	46	172	126	140	135	105	65	187	59	123	52	215	147	86	111	98	266	94	82
COBS00244	6	270	101	113	334	78	151	217	541	240	91	363	964	274	429	273	953	655	365	403	497	1012	329	367
COBS00245	537	75	296	349	104	119	497	450	379	846	915	90	671	894	284	83	755	1278	1383	129	179	496	1390	185
COBS00246	0	213	100	227	350	83	351	287	251	246	183	485	1535	967	817	424	2385	1091	1236	610	718	1833	815	671
COBS00247	1	65	28	142	58	17	162	330	0	187	287	46	159	565	63	60	141	117	762	71	81	141	272	63
COBS00248	450	98	87	126	378	56	106	116	314	130	196	56	668	272	685	100	630	936	526	202	176	736	605	168
COBS00250	12893	3931	5603	6452	11080	2976	6845	7119	19958	7981	7984	1682	15872	4711	12017	2275	13507	16027	7527	3723	3698	17292	10295	4142
COBS00251	0	14	1	6	1	2	1	0	0	1	0	5	5	14	12	0	7	7	0	1	1	7	6	0
COBS00252	0	65	2	19	29	0	16	10	47	24	27	31	39	34	29	50	57	32	26	33	29	81	31	33
COBS00253	3604	1618	1845	4868	4176	1086	7108	6473	3370	4999	5009	1118	3357	5554	3326	1318	6820	8119	8660	1519	1774	5298	8549	1837
COBS00255	437	322	142	281	228	114	463	420	241	239	436	192	537	325	271	220	374	496	298	258	251	535	327	244
COBS00256	726	2795	985	1595	181	519	3025	2247	378	1903	1491	1390	516	1192	242	2052	577	3583	1390	864	705	505	1969	1337
COBS00257	540	154	174	285	20	90	632	644	2	605	376	146	68	328	27	95	133	954	410	129	93	81	724	82
COBS00258	197	84	123	31	24	91	96	68	19	129	64	73	130	60	52	15	76	1597	158	58	44	115	445	53
COBS00259	466	1016	748	1306	1314	476	1602	1783	1556	1357	1186	883	2927	1274	2496	902	3118	3575	2341	1887	2027	3731	3243	1461
COBS00260	0	0	6	7	17	15	57	49	33	22	25	1	4	7	6	2	4	14	11	3	3	4	16	1
COBS00261	0	4	10	49	22	12	28	14	0	26	15	9	7	8	9	2	10	21	21	8	10	14	19	2
COBS00262	1	792	271	674	872	132	857	859	972	789	958	653	1844	1321	1185	998	2253	1279	1678	1052	1356	1977	1274	1014
COBS00263	0	121	13	145	16	13	19	54	19	51	63	5	8	8	11	8	9	16	16	14	6	16	10	2
COBS00265	407	521	410	1370	1179	240	1521	1401	976	1118	1540	328	864	1111	991	284	1286	1121	1802	775	546	922	1322	351
COBS00266	1	0	15	12	0	12	37	22	0	460	58	0	0	35	0	0	1	697	236	0	4	1	3263	1
COBS00267	560	975	484	263	568	181	451	445	1984	673	491	744	1452	458	798	659	1398	2601	572	708	900	2017	993	944
COBS00268	0	143	74	450	1343	87	439	393	402	400	587	74	786	385	706	80	1227	225	672	249	110	978	372	94
COBS00269	2	6	172	7	27	80	27	28	112	35	17	5	17	22	52	6	29	56	20	17	18	95	34	10
COBS00270	234	63	40	25	67	5	60	82	301	56	87	4	35	10	11	10	25	16	15	14	4	41	14	5
COBS00271	0	2	0	13	6	0	11	12	0	1	3	0	1	17	3	3	0	6	12	3	0	1	2	0
COBS00272	497	5	23	143	259	0	113	114	0	79	149	15	53	57	124	8	86	46	113	29	14	75	96	15
COBS00273	0	6	15	1	13	0	10	10	0	21	2	1	2	6	5	0	1	18	7	0	1	1	13	0
COBS00274	0	0	14	4	3	2	6	7	0	0	0	0	1	0	7	0	0	4	1	0	0	2	4	4
COBS00276	0	13	8	15	15	15	24	3	0	24	18	20	33	66	23	3	9	45	15	11	2	13	26	4
COBS00277	0	0	27	74	145	9	88	85	1016	26	95	7	21	24	265	4	39	42	55	22	13	634	31	4
COBS00278	0	3	7	11	12	2	11	16	0	9	22	2	4	6	13	1	8	19	8	7	0	3	10	0
COBS00279	0	0	2	0	14	9	18	7	0	0	17	1	10	7	15	1	7	23	30	3	2	10	28	3
COBS00280	1	66	53	74	172	28	121	164	134	114	153	34	101	109	132	13	192	155	162	76	29	169	133	37
COBS00281	0	56	33	66	202	42	119	105	114	106	142	66	259	105	161	52	275	184	145	89	122	254	114	97
COBS00282	1420	1682	961	798	1626	448	1554	1416	3623	1751	1472	748	2132	935	1497	679	2125	2987	1249	1136	1104	2086	1605	851
COBS00283	438	1599	1334	602	1039	630	922	776	755	1289	754	1619	2044	1001	2160	1032	2617	8257	1174	2398	1725	2280	2728	1947
COBS00284	763	1210	934	2839	2931	735	2306	1983	1869	2128	2782	580	3723	2350	3278	1157	4250	3591	3523	1482	1253	3938	3511	1212
COBS00285	0	0	9	3	4	1	6	1	0	13	0	1	0	2	4	0	5	12	10	4	0	1	5	0
COBS00286	0	0	6	0	4	1	5	2	0	11	0	0	1	0	7	1	0	7	1	1	1	2	4	0
COBS00287	0	0	17	0	0	10	0	1	1	1	4	0	0	1	1	0	0	1	0	1	0	0	2	0
COBS00289	0	10	16	60	130	20	32	66	0	98	105	8	26	11	89	11	31	56	35	14	5	20	68	4
COBS00290	0	1	15	7	40	0	12	4	0	38	34	6	19	6	62	5	16	26	36	14	6	7	35	7
COBS00291	596	47	203	12	51	127	23	37	30	190	6	8	60	25	92	10	39	752	58	34	35	110	422	28
COBS00293	72	152	285	1405	1115	120	1487	1520	928	1030	1606	103	1389	1876	976	105	2268	695	2628	224	154	1402	1129	139
COBS00294	0	326	132	118	140	60	140	146	269	159	85	310	545	239	359	265	566	830	274	364	424	805	586	481
COBS00295	6452	11310	5676	10165	14860	3148	12776	12068	11398	12233	14549	4631	12590	8515	12024	5259	13473	13647	12507	6666	6366	12601	11544	5834
COBS00296	0	47	52	169	200	23	88	146	0	92	72	58	231	215	538	89	253	395	391	153	109	241	433	91
COBS00297	0	199	60	126	105	44	137	112	250	188	101	219	483	267	321	190	514	679	342	295	260	755	737	286
COBS00298	371	445	56	179	109	75	267	235	152	269	145	720	873	623	384	821	941	1147	762	649	943	1129	1191	779
COBS00299	550	2478	603	819	599	250	1522	1434	918	1434	764	1146	1220	977	521	1056	1289	1805	1162	983	1234	1240	1301	1053
COBS00300	851	1875	901	1487	1396	605	1964	1842	1657	2097	1861	1191	3085	1783	1579	1349	3717	3167	2366	1564	1789	3629	2769	1832
COBS00301	1	137	46	44	130	32	124	112	341	123	45	89	250	112	166	83	269	298	177	123	116	316	189	137
COBS00302	0	475	86	132	233	73	206	228	287	229	184	518	670	243	269	446	729	594	268	399	388	744	398	314
COBS00303	1	518	65	224	44	40	586	414	145	186	113	334	67	124	52	170	89	278	545	157	858	115	522	162
COBS00305	995	210	524	1994	906	225	2583	2467	585	2116	2870	135	943	1970	1068	114	1374	1426	3404	277	159	889	2415	151
COBS00306	403	1600	545	622	709	292	937	868	623	946	1108	1220	1736	867	728	928	1842	1896	1004	1256	1005	1962	1214	1047
COBS00307	0	0	1	50	11	0	24	3	0	26	10	1	1	10	9	0	6	3	14	1	2	2	24	0
COBS00309	353	110	79	77	85	55	194	163	226	345	259	253	363	261	151	230	360	375	314	130	230	437	527	241
COBS00310	296	1159	476	727	1530	219	989	964	1074	1102	937	565	1902	882	1277	837	2103	1662	1652	1103	790	2558	1713	717
COBS00313	0	22	91	183	736	52	288	185	3	253	258	58	146	94	190	58	153	165	145	100	71	121	139	47
COBS00314	0	39	29	155	251	34	152	103	64	131	157	54	137	47	263	73	150	177	180	95	70	172	198	85
COBS00315	1	0	1	15	6	2	4	14	29	10	5	0	3	6	3	1	7	11	4	2	0	5	12	1
COBS00316	11962	8440	6210	6235	11682	2909	8449	7805	13439	9889	8130	4203	11515	5501	10896	3441	12079	16801	7223	7108	5130	12206	9755	4774
COBS00318	189	444	172	270	239	80	316	298	111	579	328	477	804	462	350	494	862	1062	693	417	573	835	945	529
COBS00319	6561	24869	4329	3264	3906	2218	4704	4078	13309	6160	4365	11720	10105	4428	4514	12039	9704	13660	5327	9613	13241	12788	7951	15505
COBS00320	350	1490	745	641	767	369	1063	1002	1873	1086	845	1433	2144	950	1094	1847	2288	2567	1074	1171	2209	3080	1499	2281
COBS00321	0	59	57	60	184	4	86	81	52	125	57	37	402	95	200	34	297	122	92	51	53	505	104	49
COBS00322	0	56	10	84	263	13	51	35	377	65	102	77	629	183	368	93	730	90	269	98	150	1008	105	172
COBS00323	612	35	126	636	695	97	813	187	436	726	1191	18	487	710	193	23	803	85	725	43	21	468	410	14
COBS00324	1	230	118	157	469	63	294	321	465	289	309	306	659	386	537	265	884	600	385	386	406	828	413	409
COBS00325	1298	7838	533	1237	540	352	1875	1358	572	1733	1692	5379	497	937	329	3563	522	1298	990	2859	3717	419	1153	1370
COBS00326	607	455	228	386	717	128	603	382	1066	436	510	327	1596	608	1115	471	1598	1173	818	504	567	1785	768	674
COBS00327	1	92	112	81	90	61	138	158	211	128	154	44	201	98	65	28	166	210	114	64	72	157	100	90
COBS00328	372	517	295	227	474	118	662	604	620	727	503	319	942	478	427	258	819	1041	518	386	412	991	552	407
COBS00329	571	163	214	520	120	82	871	982	644	1298	1012	74	175	415	252	100	214	345	724	98	98	326	1531	79
COBS00330	611	78	284	893	570	165	1433	1095	485	898	783	42	257	236	336	28	365	485	546	53	30	284	623	29
COBS00331	1	280	139	73	134	36	148	151	156	194	83	286	364	184	163	239	347	425	159	206	255	492	313	312
COBS00332	0	69	52	134	60	23	181	110	179	227	159	90	288	241	132	92	284	275	339	75	88	316	504	82
COBS00333	1670	2718	1551	1014	1559	534	1675	1422	1964	1910	1529	1667	2561	1089	1680	1373	2497	4397	1430	1711	1768	2494	1923	1663
COBS00334	455	277	114	108	208	74	252	238	225	290	173	135	341	125	170	171	298	494	205	129	188	465	323	205
COBS00335	5415	8588	5188	8008	10036	2913	10145	10275	7530	9423	9765	5141	13473	6957	11635	5440	14552	18317	13412	10341	6902	13682	12684	6406
COBS00338	0	15	14	27	14	4	9	13	54	19	4	12	10	6	19	11	13	64	21	35	18	7	44	28
COBS00341	0	64	61	106	241	35	232	201	222	151	167	69	240	101	124	60	208	126	136	56	82	253	101	113
COBS00342	527	1089	1193	731	1189	550	1482	1230	1104	1926	1513	567	1698	848	833	507	1661	3238	1203	616	690	2123	1747	547
COBS00343	0	0	0	1	7	0	14	5	0	3	4	1	8	14	1	1	0	2	6	2	0	2	2	0
COBS00344	0	4	68	1037	218	119	626	534	221	542	1018	16	432	1300	370	9	705	253	1769	53	9	362	1027	6
COBS00345	467	1117	1022	548	1394	443	1176	806	1812	1126	847	409	1802	662	980	439	1937	2393	715	703	690	2005	1002	605
COBS00346	443	542	460	179	299	237	324	299	254	413	198	364	1662	339	427	339	1030	1978	347	474	422	1893	792	404
COBS00347	5	196	184	68	194	87	192	149	238	213	50	126	461	117	262	116	381	544	135	145	186	580	206	195
COBS00348	397	864	786	729	931	472	1103	948	1521	1285	1058	886	3418	1552	1633	1069	3658	4092	1921	1262	1489	4829	2697	1327
COBS00349	126	1320	364	60	11	175	150	240	34	235	45	1405	60	233	65	1656	58	1714	229	1144	2323	109	892	1128
COBS00350	148	542	155	1409	1203	77	1156	1098	746	725	1898	538	3336	2859	2259	601	4500	719	4506	1238	981	3776	2163	767
COBS00351	0	35	26	59	38	17	24	22	28	56	38	59	87	38	124	25	72	278	54	109	82	157	154	80
COBS00352	0	1	6	11	20	2	5	15	49	25	3	28	21	20	28	14	24	80	16	26	11	21	31	8
COBS00354	635	246	221	54	506	169	30	33	544	202	45	122	426	27	869	120	548	1516	85	310	344	797	470	364
COBS00356	0	0	22	1	1	7	7	0	1	0	0	0	0	0	0	0	0	0	1	0	0	0	0	0
COBS00357	1310	1899	1342	3568	9249	886	3956	3723	8956	3788	4296	1056	7106	2391	10135	1146	7435	3594	4135	2609	2053	7870	3973	1719
COBS00358	28	19	12	35	127	12	30	27	72	35	50	9	77	25	159	22	83	57	34	36	37	76	47	23
COBS00360	0	7	17	67	168	4	35	20	68	23	31	11	119	44	289	17	131	90	74	40	31	128	112	30
COBS00361	0	0	3	46	78	5	16	6	0	9	34	23	55	16	368	7	58	86	55	34	36	71	122	30
COBS00363	422	37	30	265	499	65	98	107	103	135	111	46	91	32	520	31	146	184	72	71	42	128	169	37
COBS00364	0	12	1	0	13	2	0	0	0	3	2	1	3	2	29	1	8	17	5	3	2	11	12	5
COBS00365	783	629	515	1571	3567	243	1575	1241	3704	1391	1606	237	1502	540	3606	282	2071	1155	1103	694	526	2305	1298	513
COBS00366	0	17	0	41	110	22	29	20	0	34	21	23	47	26	237	17	95	122	101	61	44	102	101	37
COBS00368	0	1	5	25	4	3	0	4	0	3	0	0	2	2	1	1	0	2	0	0	1	0	3	8
COBS00369	0	3	5	3	6	2	9	2	0	11	1	0	5	1	12	2	6	11	1	2	3	12	10	4
COBS00370	0	0	15	9	1	6	5	2	1	5	0	0	1	0	1	0	0	0	3	0	0	0	1	0
COBS00371	218	0	6	0	6	5	0	0	0	0	0	0	2	0	6	0	2	9	0	1	0	2	8	1
COBS00372	0	0	5	14	6	1	0	0	0	5	0	1	5	1	5	0	3	20	2	2	2	7	8	4
COBS00374	0	0	2	5	12	0	4	8	0	17	4	2	9	5	16	1	3	23	1	4	0	5	11	1
COBS00378	0	0	22	8	13	2	22	2	0	10	1	0	1	0	19	0	9	26	2	7	2	6	15	0
COBS00379	126	0	5	0	1	0	0	0	0	2	0	0	0	0	7	1	3	4	0	8	0	2	1	0
COBS00380	0	3	11	31	9	10	6	0	1	13	21	3	5	1	11	2	5	32	1	0	2	4	11	2
COBS00381	0	0	16	17	0	0	16	2	10	2	0	0	1	0	0	0	0	1	0	0	0	0	1	1
COBS00383	1	0	6	4	4	4	0	50	0	3	12	1	1	1	6	0	0	4	2	0	1	1	15	0
COBS00390	0	47	81	37	64	26	48	45	131	135	31	28	68	32	77	15	81	214	53	33	21	92	89	29
COBS00391	289	0	12	2	0	0	0	0	0	5	8	1	2	3	9	0	0	50	3	0	1	16	17	2
COBS00392	0	0	13	6	0	7	0	0	0	5	0	1	6	5	9	0	1	61	0	2	3	3	17	1
COBS00393	0	7	52	0	2	31	11	2	35	51	5	1	55	15	81	1	41	612	46	9	7	154	215	10
COBS00394	1304	288	830	22	42	323	59	98	575	355	18	44	76	31	143	7	15	1879	80	33	37	244	479	90
COBS00395	0	7	85	0	8	21	7	5	45	50	0	6	2	1	11	1	5	104	6	6	5	14	33	4
COBS00396	3	19	7	76	2	2	1	4	52	4	6	168	190	458	52	0	8	13	11	13	4	3	11	0
COBS00397	1	39	63	3	23	46	17	11	0	73	2	12	6	13	22	2	11	651	27	20	5	20	202	23
COBS00400	0	4	14	9	2	0	14	1	0	17	15	8	4	4	6	0	6	29	6	6	10	9	12	0
COBS00406	0	11	5	4	0	2	0	3	0	0	0	0	1	0	0	0	2	5	2	0	0	0	2	1
COBS00410	865	821	540	395	486	314	564	561	809	633	452	896	872	485	947	560	1156	3075	588	1237	853	1186	1449	1072
COBS00413	4	540	314	238	571	113	421	400	543	530	381	369	1388	501	762	373	1331	1153	571	479	592	1504	641	591
COBS00414	1124	5257	2046	1630	2372	846	3247	2876	3691	3454	2990	2309	3298	1459	1221	2077	3249	4563	1896	2594	2403	3446	2308	2416
COBS00415	2120	8034	1776	1644	1704	699	2519	2294	5113	2806	1970	5572	4756	2240	2065	6414	5100	5147	2752	5005	6888	7516	3642	5997
COBS00416	0	92	21	34	91	12	69	54	152	81	74	110	988	297	394	131	1023	343	398	188	307	1033	258	219
COBS00417	708	914	436	736	1154	233	1125	1343	2192	1139	1053	773	2436	1263	1137	931	2465	1936	1566	824	1121	2589	1507	916
COBS00418	774	1165	393	357	486	202	528	514	678	718	528	591	1040	449	530	833	1134	1657	637	639	1014	1229	830	857
COBS00419	0	108	13	170	435	12	124	165	303	98	132	99	389	283	480	181	622	87	361	171	251	408	205	130
COBS00422	0	28	41	677	913	43	341	298	379	192	478	26	739	692	783	37	1264	221	1028	121	65	667	431	56
COBS00423	0	0	0	11	7	0	6	3	0	1	0	1	7	6	8	0	7	7	5	0	0	4	7	0
COBS00424	0	16	37	2	12	0	16	15	83	10	0	6	8	5	5	4	7	30	1	5	1	18	8	1
COBS00425	0	3	6	2	10	4	6	9	52	13	0	7	3	1	25	3	4	9	7	5	5	39	6	3
COBS00428	16440	3618	8116	211	163	2254	550	748	1395	3749	488	563	202	300	449	404	199	23647	375	304	531	665	6541	1017
COBS00429	0	22	1	18	20	5	35	46	0	56	25	14	18	31	36	9	13	39	47	22	2	23	35	11
COBS00432	285	14	62	36	58	10	20	27	32	70	18	54	5672	82	703	43	2057	460	94	120	49	6526	193	58
COBS00433	1025	2335	916	915	582	497	1565	1355	1007	1504	1509	1070	1383	1030	845	1813	1500	3641	1425	833	875	1857	2472	1610
COBS00434	2278	5266	3359	2769	6445	1874	4217	3527	7588	4658	3731	3563	9343	2844	6750	2932	9242	11629	3400	5176	4827	10849	4518	5133
COBS00435	0	4	5	20	27	9	22	17	0	32	38	24	12	37	64	16	26	60	33	44	16	23	39	5
COBS00436	220	4	7	19	31	6	35	50	0	46	37	20	6	23	32	11	20	43	27	29	6	16	29	2
COBS00439	3801	7588	1679	3540	3952	953	3978	4618	2659	3848	3606	5042	4130	2951	3427	7709	4794	5921	4439	5325	6855	4263	6502	6987
COBS00440	210	60	15	87	105	7	83	59	0	45	64	24	30	36	63	40	51	109	53	39	26	36	59	28
COBS00441	0	5	0	9	11	12	2	5	0	5	6	12	5	16	47	5	14	71	38	36	4	4	66	4
COBS00442	87	260	318	285	206	140	323	257	415	437	381	175	229	271	330	69	216	537	327	364	99	335	356	107
COBS00443	0	110	109	99	83	30	150	152	157	190	138	40	55	59	86	15	73	131	82	87	23	86	105	34
COBS00444	0	40	28	26	24	31	29	70	26	81	38	58	69	87	92	21	103	198	133	159	28	69	127	38
COBS00446	0	14	20	51	52	11	33	18	17	27	25	36	46	37	90	27	67	133	63	46	30	52	101	24
COBS00448	764	553	1644	982	2033	805	1002	1040	1354	1513	1281	437	3164	1883	1853	321	3636	7780	2490	926	617	3038	3586	647
COBS00449	0	21	62	0	3	18	4	7	0	40	14	3	5	5	3	0	6	55	6	10	1	8	24	10
COBS00452	0	2	2	117	65	1	23	26	0	12	29	3	39	75	160	6	81	43	112	22	5	34	74	8
COBS00453	341	1564	3763	721	940	1186	1847	1085	2141	1417	982	1027	1914	957	1092	1368	1952	2452	1234	1106	1562	2293	1958	1850
COBS00454	473	650	318	284	529	144	482	486	1273	511	400	462	747	292	421	609	798	883	360	335	565	966	408	618
COBS00455	0	5	10	0	1	0	0	1	268	17	1	10	17	4	237	4	13	24	2	11	2	548	10	8
COBS00456	380	547	225	408	477	157	657	454	393	733	747	488	1399	960	746	479	1473	1350	1108	565	530	1406	1058	598
COBS00457	406	1585	963	655	1433	322	1350	1397	1681	1246	1284	882	2305	988	1305	699	2389	3014	1155	1236	1259	2652	1460	1202
COBS00458	7517	4998	6543	3239	4477	2824	3559	3147	2510	4431	3108	4443	4798	3390	4677	2694	5604	18845	3995	6265	3320	4540	7104	4997
COBS00460	0	48	22	33	61	20	87	24	122	62	66	7	10	8	12	4	16	17	6	8	5	18	13	4
COBS00461	0	0	4	36	13	3	3	22	0	3	0	10	20	14	18	8	18	29	18	9	4	13	26	2
COBS00462	514	484	196	267	528	106	484	299	796	341	462	237	1126	486	511	246	1019	593	658	284	266	1189	537	250
COBS00463	9	323	275	183	267	84	325	222	790	346	321	94	148	70	91	69	151	258	74	92	123	241	129	148
COBS00464	798	441	473	147	257	142	362	365	685	480	202	432	457	149	285	314	471	976	224	378	376	584	469	519
COBS00465	2	0	24	24	25	20	87	51	38	51	60	4	13	24	10	4	13	41	32	4	3	18	27	1
COBS00466	6	247	129	525	43	50	690	674	0	443	632	136	167	452	66	123	136	417	546	169	144	96	587	101
COBS00467	4	45	12	44	160	23	13	8	303	28	25	31	813	108	377	67	440	107	67	92	110	1027	56	74
COBS00468	0	0	0	0	14	2	0	1	0	2	6	0	27	2	25	3	17	11	6	2	4	53	3	5
COBS00469	1	5	15	11	11	7	56	66	0	48	38	7	11	20	24	8	12	93	47	12	8	8	64	5
COBS00470	0	6	14	38	21	11	67	44	0	61	41	2	14	41	22	3	20	87	42	10	0	10	60	2
COBS00471	582	384	36	373	20	85	34	34	0	35	47	23	124	491	43	1	23	83	43	5	3	10	50	2
COBS00472	0	3	3	21	18	6	66	34	1	67	49	2	5	22	6	1	12	50	23	5	1	9	45	1
COBS00473	0	8	0	18	11	6	22	22	9	39	23	5	11	32	16	2	10	35	24	8	2	2	26	1
COBS00474	1	1	77	52	22	32	100	78	0	65	96	6	22	28	25	3	19	78	69	7	10	16	86	9
COBS00475	50	12	152	42	24	133	125	79	50	93	30	18	28	213	24	2	14	77	68	14	2	16	86	8
COBS00476	319	39	33	215	26	25	64	63	0	85	41	11468	16665	69011	5853	7	52	91	91	8	1	56	72	38
COBS00477	3	50	88	114	53	48	253	232	0	351	304	46	50	132	49	58	66	178	152	40	34	61	196	56
COBS00478	0	596	204	663	118	93	800	769	237	850	798	451	533	920	165	1259	767	809	1137	385	465	414	1236	868
COBS00479	0	0	20	16	7	13	9	3	0	25	0	3	8	2	9	1	9	43	11	10	2	8	17	3
COBS00480	119	13	162	143	72	32	167	98	14	134	131	27	148	148	70	22	153	78	216	17	20	91	118	31
COBS00481	0	29	119	744	1566	79	566	615	515	397	848	40	1182	970	1250	37	2087	402	1540	116	65	1304	816	40
COBS00482	0	10	3	1	6	7	3	18	0	3	0	3	7	6	13	1	2	32	8	7	2	8	10	2
COBS00484	0	0	1	0	27	0	1	21	0	15	21	2	15	12	18	1	20	8	23	4	3	7	15	0
COBS00486	0	0	0	0	3	0	0	0	0	11	0	0	0	0	2	0	0	10	6	2	0	0	0	0
COBS00487	2059	3784	934	1120	20	635	1495	1457	119	3519	1453	4316	230	1052	82	3587	82	5446	1592	4598	3527	224	5391	3240
COBS00488	9094	9645	5141	15054	1003	2736	39957	41251	4583	22333	35514	2319	4205	23494	2542	2405	5441	10965	31468	4935	3523	2405	19681	2233
COBS00489	635	98	241	1295	1336	202	1522	1188	711	991	1794	70	1065	997	1078	54	1466	977	1707	153	91	1023	1163	117
COBS00490	0	0	3	33	60	1	45	22	0	17	81	1	9	22	58	4	16	31	64	4	1	9	64	0
COBS00491	0	0	0	32	22	2	8	3	0	5	14	2	9	5	25	1	18	15	20	3	2	4	30	1
COBS00493	1	0	2	128	78	7	61	31	0	21	38	2	20	21	73	1	19	28	74	3	1	14	63	5
COBS00496	204	73	59	10	22	25	20	32	41	63	6	12	14	4	6	2	20	35	11	14	7	23	28	13
COBS00497	0	0	1	16	37	0	12	8	0	9	2	0	14	11	12	0	12	8	6	2	0	5	6	0
COBS00498	0	7	8	61	36	3	54	43	14	31	34	1	13	19	30	7	24	26	25	7	3	14	22	1
COBS00499	0	3	12	0	7	10	2	11	0	8	0	3	5	1	5	0	4	16	1	5	1	3	7	2
COBS00500	206	1	6	60	27	6	47	37	0	25	6	1	8	9	16	0	11	11	24	1	2	7	11	2
COBS00501	1028	957	601	1633	33	352	3316	2089	100	2720	2040	563	405	574	39	1240	408	1538	655	708	1078	215	2198	1451
COBS00502	0	0	0	1	1	0	2	0	257	0	6	2	4	0	11	0	0	1	0	0	0	66	0	0
COBS00503	0	6	1	0	5	0	0	2	25	10	0	0	0	1	0	0	0	1	0	0	0	2	0	0
COBS00505	101	82	110	149	485	52	99	68	937	160	56	87	4830	149	952	84	1742	404	174	162	163	4876	264	239
COBS00506	154	41	31	68	273	18	62	54	34	90	43	63	3347	92	347	32	853	278	97	92	48	2958	228	50
COBS00508	1	4	1	1	5	1	8	3	1579	16	1	3	16	28	272	1	3	13	3	1	2	672	5	0
COBS00509	0	99	247	1150	381	131	821	773	288	529	1389	21	455	889	494	16	577	236	1606	61	50	490	726	37
COBS00510	2085	6	3144	34	43	1909	228	779	13	54	53	18	59	34	78	17	29	112	439	32	22	48	8443	22
COBS00511	0	1	3	42	14	2	40	49	0	29	69	0	10	44	18	0	11	8	64	1	3	13	23	5
COBS00512	452	859	1138	858	997	593	1694	1495	3779	1869	1556	443	1305	670	493	367	1369	1106	674	413	456	1723	979	522
COBS00513	0	49	42	111	379	26	140	118	288	83	90	93	859	197	309	88	485	280	317	137	119	1068	351	136
COBS00514	495	257	138	128	253	69	206	257	610	185	137	192	553	206	350	192	643	550	236	382	400	792	368	300
COBS00515	6356	2921	3567	3312	18	1457	9843	18859	908	12291	4877	4072	110	15696	173	6925	8946	22882	11732	3157	8078	5388	66826	5830
COBS00516	1131	3191	928	733	1240	373	1381	1224	2899	1312	1353	1364	2505	873	934	1648	2326	2333	1005	877	1487	2888	1225	1918
COBS00517	1322	1445	1043	873	1051	589	1366	1332	1098	1619	1137	823	1973	1280	1160	775	2239	4888	1605	914	898	2538	2217	990
COBS00518	1920	3145	1341	801	1321	512	1528	1325	3889	1805	1699	2259	3293	1534	1778	2237	3594	4219	1642	2253	3254	4165	2682	3878
COBS00519	1255	1543	652	756	1235	495	753	699	2313	954	638	2247	5372	2035	2461	4169	6412	6085	1771	2400	3031	7241	3060	3737
COBS00520	149	300	93	252	1131	85	143	133	2075	219	190	200	2138	355	2278	210	2547	483	493	340	231	3105	401	281
COBS00521	0	1	577	172	104	417	419	270	2723	162	74	1	1873	208	279	3	3663	577	301	7	14	4257	591	22
COBS00522	0	96	237	1210	362	88	2663	2288	2747	2207	1331	121	1139	1098	2119	205	939	1061	676	263	317	3548	4555	292
COBS00523	945	131	482	1669	527	186	2147	3038	1466	1889	1811	194	485	641	1923	79	707	1237	1141	447	147	902	2340	161
COBS00525	466	5315	138	1106	33435	102	339	310	63858	647	475	1729	52834	378	59221	5591	56954	236	537	6800	9470	84414	604	9236
COBS00527	624	1375	938	733	709	552	1653	1765	797	1978	1825	1001	1707	2023	677	3223	2161	4361	1639	372	271	2099	2895	1369
COBS00528	0	244	146	45	102	30	181	109	216	248	213	89	306	214	140	239	218	516	188	76	39	348	356	123
COBS00529	0	41	21	27	53	21	38	50	36	35	28	28	126	58	80	21	127	171	83	33	53	168	108	52
COBS00530	1	179	99	120	252	42	165	188	268	200	173	211	1649	634	842	250	1730	1244	895	409	520	1982	839	488
COBS00531	0	10	13	4	42	4	24	43	1	21	51	13	87	52	40	13	89	60	30	26	30	93	38	23
COBS00532	180	520	306	267	320	111	595	634	570	655	482	429	967	614	447	376	1040	1609	764	434	445	995	732	493
COBS00533	0	15	5	18	6	7	11	8	34	15	27	12	16	11	24	3	6	17	11	12	8	50	11	7
COBS00534	0	809	37	43	18	43	66	51	4	69	8	363	239	134	62	1612	270	775	100	1000	3164	308	326	2356
COBS00535	0	0	1	8	2	2	0	0	0	11	0	0	0	1	3	0	0	20	1	1	0	2	16	1
COBS00536	1	60	262	637	782	1186	656	684	252	414	1070	50	634	975	774	19	1069	470	1423	95	67	610	790	54
COBS00537	0	2	0	10	78	7	63	35	0	25	69	3	14	43	35	0	29	17	71	3	4	21	40	1
COBS00538	0	1	9	0	6	0	10	2	0	2	13	0	0	1	0	0	0	4	0	1	0	2	0	0
COBS00539	0	0	1	12	18	1	21	11	0	17	2	3	7	12	13	0	3	5	29	3	10	0	10	2
COBS00543	824	953	294	554	264	151	850	636	517	745	832	63	88	120	58	60	110	171	226	65	83	114	230	91
COBS00544	4305	8663	3006	4763	2714	1176	8571	7980	3233	8601	7639	3156	3840	5197	2059	3193	4550	7292	6610	3045	3716	3434	7306	3123
COBS00545	0	25	4	0	104	8	2	1	19	8	0	1	28	6	19	4	291	22	11	4	1	38	4	1
COBS00546	0	6	0	66	139	1	1	0	0	12	3	74	14133	1911	199	0	271	4	1214	4	0	4509	13	0
COBS00547	0	0	4	0	953	0	1	0	0	0	0	0	35	0	1	0	19	1	4	0	0	315	0	0
COBS00548	0	0	2	0	21	3	0	5	44	1	0	1	92	6	4	0	47	1	10	0	3	102	0	0
COBS00549	276	0	221	1	8	198	23	11	1	0	0	0	31	5	1	0	16	2	3	0	1	75	1	0
COBS00550	1	0	1	9	175	0	2	0	0	1	10	1	71	7	6	0	79	5	9	1	0	169	4	0
COBS00551	1	0	0	2	1379	2	4	1	0	2	0	0	100	11	31	0	124	8	18	0	0	427	6	1
COBS00552	0	12	225	2	202	230	37	4	0	10	1	1	8	4	10	0	80	33	46	2	2	262	15	0
COBS00553	3	1	80	33	920	40	29	14	69	62	17	10	52	29	56	1	72	342	47	7	7	93	114	4
COBS00554	12	20	51	62	4537	46	23	12	64	44	9	56	503	28	255	37	270	164	36	8	4	1221	73	1
COBS00555	0	19	42	12	1298	12	12	12	29	16	0	5	81	5	70	0	108	28	12	13	1	373	14	3
COBS00556	0	0	5	13	20	1	45	11	0	17	7	0	17	22	17	0	14	57	37	2	0	24	37	2
COBS00557	0	28	1	8	1175	19	13	7	465	19	3	15	149	14	238	25	74	21	14	35	81	2606	13	31
COBS00558	0	51	5	40	78	11	44	73	87	55	62	32	186	103	119	43	210	93	96	71	70	197	65	70
COBS00559	0	30	25	98	187	10	116	67	119	139	188	35	171	99	104	34	162	56	93	52	57	147	62	31
COBS00560	2	16	18	46	139	6	47	61	54	42	51	42	165	80	86	19	167	73	115	45	51	132	79	48
COBS00561	240	152	52	220	269	16	190	155	67	158	229	125	615	269	486	109	659	215	355	171	185	530	260	181
COBS00562	0	0	3	5	0	0	1	0	0	12	0	5	9	8	7	3	4	9	2	6	0	3	9	1
COBS00564	0	0	0	15	5	0	8	0	0	3	0	3	1	10	5	0	3	1	9	2	0	3	3	0
COBS00566	1	0	26	44	5	17	52	30	0	97	21	1	0	5	4	0	2	40	25	0	1	1	35	1
COBS00567	0	1	18	13	0	0	7	19	0	3	0	2	0	2	1	7	2	15	9	10	6	0	8	0
COBS00569	2	0	15	25	7	8	27	70	0	18	44	14	3	5	9	4	0	24	17	120	0	0	38	0
COBS00572	0	0	0	0	0	3	22	12	0	16	9	0	2	1	1	0	1	5	7	2	0	3	16	0
COBS00575	1	3	1	17	0	0	1	0	0	0	0	0	1	1	3	0	2	6	2	0	0	0	3	0
COBS00576	0	0	4	7	1	0	6	2	0	5	15	0	0	0	0	0	1	1	0	1	0	0	9	0
COBS00578	0	0	0	4	0	2	7	13	0	13	12	1	1	2	3	0	0	20	11	0	0	0	31	0
COBS00580	0	0	3	2	9	1	11	2	0	18	1	0	1	0	0	0	0	8	0	0	0	0	2	0
COBS00581	48	0	33	1	3	8	1	1	0	0	0	0	0	0	0	0	0	6	0	3	0	0	1	0
COBS00585	0	0	6	3	0	1	12	6	0	1	0	0	0	2	1	0	1	17	8	0	0	1	13	0
COBS00587	0	0	3	8	1	1	11	9	0	8	28	0	0	1	0	0	0	7	2	0	0	0	7	0
COBS00597	0	105	116	38	94	24	115	149	81	145	145	2	1	2	0	1	0	9	0	0	1	0	3	0
COBS00599	0	1	29	3	1	28	8	0	0	10	0	1	6	5	9	0	1	56	8	0	0	4	6	0
COBS00601	0	0	1	0	12	2	7	0	0	9	11	1	21	14	18	4	19	9	14	5	6	18	9	2
COBS00603	0	2	0	0	0	0	0	0	0	12	0	2	0	1	0	0	0	23	1	1	3	2	17	1
COBS00604	0	63	2	5	1	14	14	14	0	11	0	4	2	1	4	12	0	23	1	12	8	2	18	9
COBS00606	0	0	3	16	0	6	0	0	0	1	0	0	0	3	6	0	1	17	0	5	0	0	6	1
COBS00610	1	24	30	46	1	3	2	6	0	12	0	2	4	13	4	1	4	10	3	2	2	2	28	0
COBS00612	0	0	3	0	0	0	0	12	0	1	0	0	0	0	0	0	0	0	0	0	1	0	2	0
COBS00621	1835	754	678	33	358	28	559	392	1386	769	726	1	7	0	0	2	1	16	3	1	3	3	4	3
COBS00625	0	0	18	0	0	2	0	0	0	11	1	0	1	0	1	0	0	14	0	0	0	2	5	0
COBS00626	0	0	5	0	0	0	0	0	75	3	0	0	0	0	0	0	0	8	0	0	0	0	3	0
COBS00652	22	113	153	50	114	22	111	86	228	135	103	7	6	3	6	4	4	29	6	3	5	5	13	9
COBS00657	0	5	11	22	8	4	25	51	0	65	0	0	2	2	1	0	2	5	2	2	0	0	8	0
COBS00665	0	0	0	16	1	1	0	0	0	0	0	0	0	1	0	0	0	5	4	1	2	0	1	0
COBS00666	0	39	21	93	0	9	0	1	0	0	0	28	10	32	0	0	0	2	1	0	0	1	76	0
COBS00671	0	5	2	4	0	9	7	0	0	17	0	2	2	9	4	0	0	2	2	0	0	0	1	0
COBS00683	0	0	1	9	1	0	0	0	0	12	4	1	1	1	0	0	0	2	0	0	0	0	1	0
COBS00685	1	0	7	0	0	0	0	3	0	0	16	0	0	2	2	0	0	14	1	0	0	0	9	0
COBS00688	0	0	12	8	0	0	4	15	0	5	5	1	0	2	2	0	1	7	3	2	0	0	3	0
COBS00689	270	0	17	2	0	63	0	0	0	10	0	0	0	0	2	0	1	2	0	0	0	0	0	0
COBS00690	50	2	90	24	0	127	2	6	0	3	1	2	29	61	9	2	3	4	1	0	1	1	3	0
COBS00692	5	34	33	66	71	14	26	95	1	53	33	149	318	158	170	126	314	274	162	262	135	313	152	160
COBS00693	0	45	18	74	108	8	107	80	144	115	43	47	232	71	164	54	205	136	103	71	93	357	107	107
COBS00694	0	0	29	7	9	10	3	3	61	44	0	2	7	6	12	2	5	119	9	6	1	16	26	8
COBS00695	250	1158	837	348	569	411	499	418	681	810	518	795	1269	596	558	505	1363	4200	838	838	797	1292	1350	1097
COBS00696	319	771	391	596	837	153	928	839	935	769	831	536	2007	1149	1201	715	2063	1782	1396	705	861	2378	1557	853
COBS00697	4	380	189	494	425	125	775	484	731	720	612	476	1498	1023	823	649	1588	1254	1324	680	902	1579	1198	715
COBS00698	727	1206	898	646	877	371	1249	1046	1554	1484	1033	621	1508	772	640	669	1446	2224	882	490	594	1712	1201	684
COBS00699	287	564	455	1221	2189	294	1662	1376	1115	1315	1989	257	2080	1477	1697	216	2769	1644	2116	573	413	2369	1532	373
COBS00700	5090	5107	3796	5573	11995	3327	4122	3202	12521	5328	4435	2685	17848	3140	18574	2337	15236	13135	5120	4356	3783	19727	6850	3308
COBS00701	0	8	2	25	76	10	10	6	0	9	0	16	54	10	195	9	67	76	14	22	14	68	40	11
COBS00702	0	1	0	6	11	4	11	11	1	4	13	1	3	2	2	0	2	5	2	0	0	1	2	0
COBS00703	0	0	17	0	118	7	2	2	257	20	12	6	105	7	299	3	77	38	17	5	6	120	25	8
COBS00704	0	2	27	0	9	2	4	2	36	1	3	0	5	1	6	0	5	15	1	0	3	6	5	0
COBS00705	76	0	16	15	91	4	0	9	73	13	1	3	28	1	88	1	29	13	4	2	6	35	11	4
COBS00706	0	5	12	40	17	19	3	2	0	18	6	10	28	13	60	8	37	107	25	13	7	48	50	6
COBS00707	1027	316	624	1018	1037	407	1156	1260	2849	1123	933	201	2537	879	2430	153	2059	3089	1230	222	212	3514	1852	271
COBS00708	1	10	1	9	5	1	5	0	364	10	15	3	12	0	204	4	16	28	23	10	4	514	10	3
COBS00709	3	246	69	119	122	50	182	77	206	157	124	172	489	194	425	195	563	259	277	446	162	924	308	173
COBS00710	0	0	18	4	1	2	0	6	96	8	0	1	0	2	35	3	2	26	9	1	3	103	10	3
COBS00711	0	13	22	25	8	11	0	8	4	39	25	0	0	1	4	1	4	16	8	7	2	3	15	0
COBS00712	0	0	13	2	0	0	21	5	0	2	15	0	0	3	0	3	0	5	2	0	0	3	2	0
COBS00714	0	0	1	3	5	1	5	4	75	13	0	2	2	3	17	0	4	15	5	3	2	20	10	2
COBS00715	0	0	1	0	0	6	4	0	32	1	1	1	0	6	4	0	2	14	9	2	0	2	4	0
COBS00716	644	191	319	120	793	244	121	146	838	172	85	117	1641	199	1772	148	1569	985	365	290	342	1878	778	316
COBS00717	0	0	0	4	7	7	0	11	0	4	0	0	2	4	5	0	4	12	9	1	0	6	18	0
COBS00718	4059	3157	2494	4105	7637	1631	4270	4168	3160	4236	4328	1964	7504	5107	4423	1943	7837	12124	7351	3410	3325	7387	6324	2798
COBS00719	360	1432	1339	689	1064	632	984	877	737	1086	884	997	2321	1116	1356	906	2443	9399	1434	1712	2135	2607	2723	3310
COBS00720	0	176	123	87	137	59	147	186	253	181	205	376	373	226	259	327	472	979	246	259	354	525	486	412
COBS00721	1217	1022	688	881	956	421	898	777	2320	1025	810	842	3181	1560	1654	875	2453	3017	1851	1143	1004	2771	2205	1341
COBS00722	195	287	202	394	473	102	422	404	450	378	373	377	755	428	900	282	1006	1061	730	666	438	880	767	407
COBS00723	0	203	82	64	164	32	152	96	25	136	141	116	132	64	207	73	167	208	98	150	94	147	110	115
COBS00724	3338	3725	1423	1237	1807	713	2232	2216	3758	2328	2010	2126	4494	1969	1757	2257	4503	5395	2168	1899	2424	5462	3068	2877
COBS00725	79	80	32	9	35	9	54	60	61	62	70	3	0	2	0	2	2	2	0	0	1	0	4	2
COBS00726	0	0	0	15	4	9	4	4	0	0	0	7	5	3	3	4	5	23	10	12	5	8	14	2
COBS00730	0	0	5	1	0	0	0	0	0	7	15	3	1	7	6	1	4	3	14	3	0	0	2	1
COBS00731	0	14	18	41	19	9	14	27	26	56	5	29	17	13	9	24	10	35	15	8	16	14	23	8
COBS00732	0	3	2	2	6	14	0	11	0	5	3	2	0	4	4	2	2	5	10	4	1	3	5	3
COBS00735	1	0	2	73	24	7	33	32	50	15	30	4	24	61	63	10	55	31	129	10	3	42	98	6
COBS00736	0	0	0	10	2	0	2	13	0	7	4	2	3	0	2	0	0	7	1	4	0	0	5	0
COBS00737	0	322	421	3024	993	486	1520	1431	169	1640	1804	485	577	1449	781	611	813	1432	2665	481	313	439	2745	302
COBS00738	1	2	22	250	128	52	141	115	0	153	192	69	115	217	176	83	116	332	452	74	44	57	533	57
COBS00739	1852	1146	942	5737	2048	941	3454	3998	427	3859	3949	1230	1859	4451	2482	1500	2797	4310	9155	1513	917	1494	8227	964
COBS00740	0	9	6	19	11	7	25	31	1	28	27	2	4	9	6	0	7	12	14	3	3	7	16	1
COBS00741	1775	2787	1786	1119	2019	914	1530	1342	3053	1799	1439	1726	5466	1912	3073	1478	5235	8648	2250	2781	2594	6042	3885	2379
COBS00742	53	53	222	1053	673	115	930	812	267	723	1086	26	641	1130	491	32	991	634	1604	67	27	439	997	31
COBS00743	0	39	59	349	472	27	346	337	130	193	338	3	141	172	160	4	208	102	309	13	6	97	177	4
COBS00744	0	21	14	73	58	9	44	20	0	33	42	4	32	75	51	0	43	76	120	6	8	51	97	5
COBS00747	0	0	0	5	2	0	4	9	0	5	12	5	0	1	5	1	0	8	3	2	1	5	14	1
COBS00748	1	3	2	35	10	3	12	8	0	7	13	0	10	15	16	2	4	7	23	1	1	5	17	1
COBS00749	0	0	0	0	1	6	13	12	0	13	1	0	0	3	7	0	0	5	6	0	0	1	8	2
COBS00750	0	0	0	48	4	3	0	17	0	5	13	1	2	2	4	3	6	4	5	1	0	2	7	1
COBS00751	1	0	20	1	5	14	8	3	0	1	2	0	1	2	0	0	0	3	1	1	1	5	7	0
COBS00753	901	892	677	1532	2164	438	1333	1409	1514	1381	1744	458	1924	1060	1535	400	1943	2732	1507	687	624	1992	1617	538
COBS00754	0	70	23	24	56	16	59	65	0	86	76	233	410	223	209	232	466	434	277	214	222	580	291	259
COBS00755	2	193	105	107	166	50	203	213	253	167	201	449	1045	456	470	443	1069	1091	544	496	643	1126	571	642
COBS00756	0	265	113	122	257	37	238	197	211	306	220	183	692	304	344	173	702	613	377	249	251	754	358	256
COBS00757	1777	174	747	3837	2048	424	4129	3753	708	2919	4465	91	1242	2114	1559	61	2238	2312	3886	209	102	1064	3964	71
COBS00758	0	33	30	433	302	28	306	258	66	180	283	25	231	401	207	25	361	168	564	78	45	173	287	27
COBS00759	403	222	227	1536	1104	153	1413	1132	397	1052	1596	108	1095	1721	996	103	1778	771	2738	276	190	959	1600	147
COBS00760	0	137	109	835	575	81	831	731	382	608	1012	57	570	923	428	45	983	382	1313	145	119	478	736	64
COBS00761	0	81	73	350	153	23	586	364	54	318	294	26	111	208	93	27	248	220	363	52	20	84	296	15
COBS00762	729	26	515	44	83	793	81	163	570	144	90	23	75	42	207	16	54	242	99	30	23	237	717	28
COBS00763	0	18	3	2	59	0	64	25	0	40	48	3	8	8	4	1	4	8	2	0	1	2	1	2
COBS00764	8698	4148	4679	8933	12925	3811	9300	8455	8619	8433	8879	1885	17067	7437	11635	2248	15595	11911	11060	3416	3065	17838	10560	3259
COBS00766	0	5	38	88	107	26	96	95	0	62	94	27	129	110	244	29	142	209	202	73	43	128	167	43
COBS00768	1839	2116	1483	1488	885	600	3045	2596	1369	8625	3209	1208	2177	2236	978	2121	1949	3504	3052	1064	1423	2116	8627	2242
COBS00769	876	1821	1581	1018	1278	655	1703	1564	2726	2129	1609	908	2374	1333	1322	928	2424	5314	1521	1069	1194	3032	2526	1375
COBS00770	1404	1004	524	425	821	252	730	589	1112	841	690	713	2117	933	1083	634	1927	2441	1084	906	925	2434	1197	888
COBS00771	1	153	179	171	171	45	189	138	218	167	157	140	397	188	185	115	433	608	268	178	162	516	302	168
COBS00772	0	2598	814	937	148	404	2005	1822	59	1831	1261	2016	188	896	156	2465	242	2169	1084	1095	1458	138	1617	1341
COBS00773	3058	1108	1792	4017	1741	919	3974	3756	977	2781	4701	474	1587	3427	1617	369	2349	7272	4764	814	525	1449	4116	728
COBS00774	1	36	21	132	139	34	133	169	35	117	248	39	111	94	124	17	130	150	216	56	35	101	415	30
COBS00775	0	80	83	278	133	47	278	265	1	185	310	24	97	182	86	21	123	355	294	31	24	90	228	39
COBS00777	1	13	1	15	10	5	16	13	1	15	8	5	2153	5	71	3	793	21	13	3	1	2483	7	0
COBS00778	23	968	550	241	307	376	585	435	357	682	287	585	1005	1835	459	778	717	3641	512	364	677	885	1231	842
COBS00779	0	23	69	11	4	20	9	25	0	28	11	140	35	56	5	118	33	376	20	1	3	33	76	15
COBS00780	0	2	30	2	8	8	3	6	71	5	2	0	2	4	6	0	6	38	2	5	1	17	15	6
COBS00781	1836	1616	1142	3526	4097	817	4546	4246	2869	3554	5952	811	3230	3342	2132	1000	4580	2902	4723	1616	1806	2840	4557	2315
COBS00782	0	0	16	9	5	11	4	2	0	2	12	9	3	4	16	7	2	30	3	10	2	4	15	4
COBS00783	0	0	3	32	0	3	0	0	0	7	7	3	2	0	8	1	1	26	2	6	0	4	17	1
COBS00784	0	0	3	0	2	5	6	6	0	13	0	6	4	1	2	1	0	15	1	9	2	3	7	1
COBS00786	1	205	86	245	418	46	234	232	290	158	458	68	318	208	385	76	443	185	300	191	172	402	207	103
COBS00787	0	1	0	7	11	0	7	3	1	1	5	5	11	9	9	0	5	6	14	1	6	6	7	1
COBS00788	597	2304	931	1145	5521	433	1781	1480	3190	1561	1808	875	8859	1508	2838	863	4518	3156	1867	1479	1319	6725	1750	1165
COBS00790	785	237	1371	11	25	773	8	29	297	700	4	20	39	30	90	17	20	12975	54	19	23	122	2566	272
COBS00791	103	70	189	490	2291	100	399	98	1243	363	548	21	2802	1006	301	29	2454	71	1276	21	12	2393	379	23
COBS00792	0	798	4	15	6298	0	61	10	1677	1	0	83	574	348	182	21	1641	4	573	11	8	2217	1	4
COBS00793	3	14	20	18	41	12	58	101	24	55	5	136	297	131	146	155	308	278	175	133	216	440	253	249
COBS00794	1827	13949	2044	2180	2005	962	3292	3133	6050	3932	2552	10731	10822	5282	3762	11674	12548	9273	5998	13362	14482	15597	7382	11872
COBS00795	1013	7332	888	1978	237	583	3310	3279	295	1644	1716	3243	683	1999	396	4003	778	4763	1996	2288	2027	819	2904	2017
COBS00796	617	5444	555	1560	875	384	2117	1765	1410	1651	2095	2868	2318	2562	1013	4492	2471	2454	2868	1385	2264	2458	2723	1441
COBS00797	3	144	313	290	721	219	464	309	677	491	347	88	5023	289	1690	90	3627	1231	362	155	128	6094	879	170
COBS00798	2	207	935	121	155	846	415	158	182	232	143	184	499	305	252	170	465	514	319	190	259	487	370	296
COBS00799	286	62	300	156	122	134	359	244	179	181	182	43	158	104	155	15	229	534	150	79	50	243	229	24
COBS00800	1	419	267	374	457	162	494	472	290	437	501	487	1500	821	799	484	1674	2389	912	563	669	1700	1083	680
COBS00801	618	443	195	565	201	151	233	250	342	285	225	342	772	695	338	291	660	981	346	333	436	736	392	365
COBS00802	187	444	286	1240	1447	265	1596	1499	1355	1044	1570	279	1849	1111	1278	335	2493	728	1566	713	615	2318	1203	582
COBS00804	0	4	3	14	7	0	32	2	0	12	0	5	6	6	9	9	12	9	16	9	10	12	11	7
COBS00805	24396	22886	9631	37642	6471	5863	60608	58745	10807	66630	69434	13549	13398	26564	10766	24616	15473	21998	37388	13527	24913	14917	79872	33039
COBS00806	0	67	0	1	16	0	73	4	0	74	42	14	41	42	16	28	35	32	33	29	43	56	71	33
COBS00807	248	421	108	185	141	76	156	212	162	258	236	427	1342	814	496	410	1234	1357	846	628	617	1340	915	612
COBS00808	0	6	0	1	3	0	2	17	0	12	0	7	14	3	2	3	5	4	3	10	8	16	6	5
COBS00809	250	574	279	507	556	225	525	473	967	598	441	347	1156	620	833	411	1371	1495	974	574	504	1631	1271	659
COBS00810	1	490	530	332	599	224	439	445	527	559	435	385	1094	466	672	307	1205	2182	512	592	638	1197	743	609
COBS00811	604	1531	524	416	248	296	725	586	366	860	545	986	566	492	189	878	599	1324	454	549	880	698	847	837
COBS00812	922	787	540	382	488	212	653	554	613	615	551	2853	1209	606	2187	1121	2829	3491	960	3026	1446	1953	1567	1939
COBS00813	9280	9714	3809	4717	5470	2331	6239	6235	9010	6071	6603	3908	8087	4754	4826	3749	8523	13018	6742	4332	4864	9566	8522	5174
COBS00814	1542	2637	900	1429	1783	708	1750	1757	1381	1665	1593	1468	3481	2109	2135	1536	3719	5849	2826	1888	2202	3811	3940	2168
COBS00815	0	394	170	232	250	114	325	254	574	432	303	602	929	510	419	686	848	1036	629	452	600	1052	779	815
COBS00816	0	359	91	119	167	72	178	214	132	339	182	455	669	412	271	570	730	725	510	387	718	938	593	620
COBS00817	314	210	187	186	405	113	295	252	547	383	113	217	393	149	358	151	390	855	152	271	305	431	287	291
COBS00818	206	282	225	179	513	85	251	303	1085	296	220	91	352	144	409	69	361	255	129	145	177	601	216	119
COBS00819	0	0	21	10	13	18	3	3	0	7	0	2	26	14	31	7	15	23	22	7	1	22	28	9
COBS00820	0	497	286	431	372	157	626	633	896	619	539	439	1448	848	469	597	1427	1497	994	444	620	1561	970	571
COBS00821	70	183	161	445	787	77	800	508	438	525	863	81	489	642	566	47	748	260	990	141	96	429	471	66
COBS00822	879	1188	1005	3269	4165	522	3938	3266	2742	3556	5015	628	2846	2745	3064	614	3641	2244	4221	1158	779	3135	3055	745
COBS00824	1108	2770	952	1064	1571	708	1250	1714	3124	2051	1549	3589	5135	2191	3988	4434	5476	6415	2825	4024	5694	7495	4523	8867
COBS00825	17	28	3	39	27	8	2	13	25	15	28	20	71	45	73	30	106	75	64	39	69	153	61	93
COBS00826	750	2058	1120	1197	1081	589	1862	1738	2898	3005	1736	1724	3065	1746	1319	1882	2685	3492	2262	1374	1765	3248	3351	2409
COBS00827	252	602	353	308	417	186	463	312	385	631	374	479	1083	456	408	383	981	1799	510	423	555	1127	799	664
COBS00828	879	3	262	106	2	204	176	644	0	190	58	10	8	323	4	31	2	1422	259	21	59	7	790	8
COBS00829	543	26799	4572	2393	71	2540	2875	4504	142	3612	1596	22969	473	3202	414	35023	454	17626	2192	13895	31226	445	7961	15166
COBS00830	0	4648	79	165	1	41	66	121	3	96	44	2842	1	149	55	4034	4	932	177	1277	3086	13	496	2195
COBS00831	0	16234	19415	56	0	14911	4298	111	16	22	20	12222	1	26	25	27151	1	45	387	14033	32420	1	442	19184
COBS00832	1919	7	2892	2116	0	1408	1765	4545	0	1816	1062	2	1	2304	22	10	6	13102	1270	2	2	6	7852	4
COBS00833	411	0	1674	527	3	1008	896	566	0	629	550	4	64	945	101	9	63	2654	1006	5	1	98	1441	13
COBS00834	846	20298	895	1784	40	623	334	309	458	252	346	7960	507	6388	1294	41817	553	8124	2286	6065	11537	1299	1818	18235
COBS00835	0	13	7	33	34	10	25	26	0	18	13	13	59	27	130	26	60	67	22	48	43	93	51	25
COBS00836	0	0	0	24	5	2	5	3	0	7	4	0	1	0	2	0	0	2	0	2	1	3	0	1
COBS00837	0	0	0	0	1	4	0	14	0	0	0	1	0	0	3	5	0	3	0	1	3	1	5	2
COBS00841	214	628	271	556	1351	143	523	517	1597	568	637	227	1880	435	1954	329	1964	692	698	743	771	2186	654	493
COBS00844	0	4	4	11	46	0	4	7	0	4	19	6	57	7	127	8	36	16	17	27	22	56	19	14
COBS00846	0	54	15	70	72	15	34	50	66	108	34	37	138	89	103	33	163	100	155	79	69	154	190	67
COBS00847	777	2433	1053	1214	1849	842	1743	1601	2772	2090	1753	1549	3665	1635	2652	1584	3748	4171	2073	2346	2484	4301	3558	2109
COBS00848	281	649	204	261	65	88	238	236	153	367	200	614	772	534	301	666	632	2224	743	809	1091	1066	1403	879
COBS00851	1055	2266	877	1935	2578	785	1572	1381	1171	1641	1774	1964	4236	3846	3615	3607	7384	9780	6829	3194	3695	4193	5146	4130
COBS00852	0	6	0	0	9	1	14	0	0	0	16	2	2	0	7	1	3	11	7	13	1	4	19	8
COBS00853	0	17	0	16	6	1	0	9	0	2	15	2	4	2	3	1	8	16	24	2	1	4	11	14
COBS00854	649	232	141	135	235	83	168	105	260	213	140	159	405	162	293	137	321	679	237	232	184	458	360	238
COBS00855	0	59	26	18	31	33	19	51	26	58	15	46	83	37	54	37	87	156	66	40	47	127	85	53
COBS00856	0	41	18	31	33	29	27	18	102	36	19	16	68	49	149	24	90	112	121	19	25	296	83	28
COBS00857	196	89	35	104	192	18	93	90	108	96	79	41	91	44	142	46	127	134	82	71	61	125	109	39
COBS00858	0	185	74	122	233	52	138	128	2	164	96	75	212	101	206	52	224	197	108	139	129	201	145	90
COBS00859	1	99	59	110	198	28	149	84	119	122	95	72	144	83	176	60	192	245	121	109	95	174	184	91
COBS00860	114	178	89	159	284	53	153	157	251	248	238	75	211	146	235	67	260	269	193	154	123	245	234	129
COBS00861	9270	9921	8012	7886	13876	5148	11703	11074	13934	11312	10834	4545	10979	6177	11653	4505	12758	14397	9079	6905	5954	13397	14446	5338
COBS00862	559	481	205	443	770	157	553	379	530	529	674	233	645	358	634	220	716	818	551	378	331	697	597	320
COBS00863	25	230	204	446	838	90	591	584	225	550	635	149	410	313	503	163	471	463	424	248	192	499	404	185
COBS00864	65	280	155	632	689	105	509	441	122	398	474	300	986	543	1978	374	1341	1208	1016	773	494	1324	1203	525
COBS00865	289	715	156	575	882	93	569	527	675	648	572	947	2007	2330	971	300	1122	650	726	540	523	1271	608	430
COBS00866	1220	1250	603	1088	2699	248	2244	1759	2017	1880	2225	364	1910	887	1444	396	2094	1066	1330	649	532	2028	1050	444
COBS00867	1	0	0	0	11	0	1	0	19	8	18	0	3	5	3	1	7	4	29	3	3	3	16	3
COBS00868	217	523	235	483	903	169	797	645	428	768	670	780	2585	1341	1551	843	2773	2530	1662	1011	1035	2810	1730	1116
COBS00869	0	0	0	16	0	2	2	1	0	0	6	2	3	3	22	0	28	8	20	24	3	12	12	2
COBS00871	1427	1270	443	788	1409	360	699	672	2439	793	924	824	5215	1005	3598	1172	5206	2567	1502	1553	1435	6452	2187	1580
COBS00872	0	1	0	35	35	9	5	5	15	18	3	37	82	28	162	23	85	106	56	65	35	91	63	33
COBS00873	1306	1141	714	363	1057	312	822	631	2775	3506	797	310	1179	565	749	333	1138	704	754	489	446	1611	1666	417
COBS00874	0	34	109	39	49	41	24	22	49	47	43	6	24	16	14	4	20	12	9	10	4	18	13	9
COBS00875	418	800	387	520	1103	203	627	533	1330	660	601	591	3099	1014	2153	576	3414	2641	1527	1109	1069	3491	1560	926
COBS00876	609	310	601	162	275	330	248	146	670	366	124	305	664	194	381	190	700	3168	212	442	352	966	1081	395
COBS00877	2700	7086	1937	2506	5026	1066	1664	1613	10269	2526	1557	5544	23103	9961	8420	6137	22018	8001	9661	5861	5734	22274	7102	6686
COBS00878	1	41	28	98	39	76	50	106	35	91	93	50	156	201	115	15	206	533	310	145	28	107	287	44
COBS00879	65	80	81	203	113	26	123	111	103	132	159	0	0	1	0	0	0	1	0	3	0	1	0	1
COBS00880	2608	2277	1958	551	656	824	748	772	2748	1319	704	735	1332	805	972	849	1402	7431	1047	1070	1101	2518	3317	1513
COBS00881	0	109	100	74	136	24	80	103	2	112	53	74	184	87	117	62	186	266	83	98	97	246	108	94
COBS00882	1048	43666	888	505	501	538	1047	1439	5021	2183	831	17305	4311	1089	1048	26508	3201	4038	1280	15544	26323	7552	3283	15119
COBS00883	0	363211	50	82	67	52	69	42	57	69	17	311154	450	179	510	104998	210	689	157	583320	695946	377	458	380542
COBS00884	0	6523	0	0	1	0	5	1	0	0	0	9652	1	1	1	3402	2	1	2	7850	18459	0	0	9237
COBS00885	312	199	182	73	64	98	33	28	194	67	77	103	179	91	170	55	152	415	311	179	138	335	276	189
COBS00886	0	4	20	9	7	12	5	11	73	26	39	15	30	6	27	11	40	86	10	33	15	31	32	19
COBS00887	83	331	263	70	154	113	133	75	459	188	110	267	263	87	336	201	323	1115	130	365	405	388	378	513
COBS00888	0	243	94	130	1102	36	158	99	839	168	177	91	1245	171	993	149	1202	238	324	306	330	1445	177	253
COBS00889	341	230	192	656	1530	114	596	647	1196	616	876	108	1462	656	848	123	1643	677	1032	248	166	1396	677	158
COBS00890	0	0	5	0	0	11	3	14	0	5	0	3	3	12	5	4	2	65	4	2	1	3	37	6
COBS00891	1	2	0	18	36	0	13	15	0	4	0	0	16	8	55	0	25	7	15	7	4	24	20	4
COBS00893	0	0	0	7	5	0	0	1	0	0	17	0	10	3	27	1	10	9	11	7	2	16	17	1
COBS00895	0	3	0	10	40	3	14	15	0	8	5	3	11	10	34	2	26	17	17	8	3	18	15	2
COBS00896	0	0	9	70	62	4	8	39	0	15	15	4	9	6	8	1	11	9	11	0	2	7	6	3
COBS00898	107	12	56	2	76	22	10	19	92	23	13	5	29	12	62	1	24	775	24	7	4	72	160	32
COBS00899	1394	1547	505	375	411	232	739	784	742	1040	1130	1223	1062	757	571	1654	1229	2285	915	1700	1571	1301	1235	1887
COBS00900	3294	6903	5328	2515	3158	2583	3510	3294	4793	5383	3110	5916	8493	4005	5317	5547	9059	28839	5065	5989	5891	10039	10425	8745
COBS00901	702	2358	927	884	719	455	1257	1316	1222	1565	1260	1045	2016	939	877	1534	1756	3126	1483	945	1473	2167	2185	1323
COBS00902	693	1402	713	840	1026	353	1262	1360	1513	1474	1312	576	1817	1029	905	551	2085	2424	1212	699	740	2106	1431	747
COBS00903	0	37	16	1	43	4	18	26	11	13	23	15	57	26	31	25	17	27	65	36	22	73	31	26
COBS00904	1426	1665	954	3912	5683	675	1994	2090	4580	2058	2035	3257	5652	6849	5341	810	2821	2501	3170	2657	2781	3990	3097	2351
COBS00909	0	38	37	116	153	15	90	79	44	78	66	22	167	83	134	8	201	80	139	70	34	117	83	24
COBS00910	0	21	36	291	265	24	192	178	135	165	186	43	800	556	636	26	1422	469	974	134	73	799	529	47
COBS00911	915	3586	599	756	191	394	972	877	290	1260	781	1870	658	716	225	3678	581	1844	883	2080	3305	596	1874	2782
COBS00912	0	24	0	37	17	2	10	27	28	4	0	1	8	13	17	4	12	13	15	10	0	7	12	2
COBS00913	1500	549	338	3478	3508	242	2354	2508	689	1711	2694	244	1576	1603	2915	222	2093	1122	2741	957	449	1396	1908	393
COBS00914	0	1	1	8	15	7	1	0	0	2	13	4	5	2	5	1	1	17	10	15	3	3	6	2
COBS00915	0	0	0	14	5	1	5	2	4	10	7	1	0	1	9	1	1	6	1	2	1	3	1	1
COBS00916	549	17	35	579	502	44	313	396	81	247	689	23	47	53	255	20	88	82	130	62	16	83	194	17
COBS00917	0	4	2	8	15	4	14	2	8	5	0	5	2	1	3	0	3	7	1	6	3	1	9	2
COBS00918	89	29	4	405	384	43	133	189	2	82	160	27	59	71	315	22	139	128	183	65	39	92	233	24
COBS00920	0	0	0	39	14	1	24	16	0	17	11	4	20	22	41	2	22	25	44	13	6	14	47	6
COBS00921	1	15	2	13	23	7	21	45	35	19	28	121	24	45	17	9	36	6	36	8	10	15	20	6
COBS00922	2114	1355	1220	2692	6691	1064	2000	1978	2707	2038	2095	1002	7400	2486	7043	998	7638	7222	3808	2501	1959	8062	4190	1777
COBS00923	0	2	1	5	6	2	0	14	0	0	5	0	6	3	11	0	6	9	7	10	0	7	3	0
COBS00924	204	343	294	88	211	168	137	138	318	192	190	407	401	147	483	230	662	1125	200	497	392	599	490	436
COBS00925	9	182	149	216	338	74	270	239	276	359	218	249	836	559	387	243	954	1254	680	306	371	627	644	399
COBS00926	0	41	66	68	48	37	101	140	73	161	100	136	88	89	50	132	93	302	102	74	67	143	226	122
COBS00927	1423	1190	835	1077	1765	401	1185	1155	1870	1303	1441	474	1646	806	879	421	1810	1827	1104	523	679	1727	1110	606
COBS00928	1252	1748	1517	811	1055	714	1124	1097	1642	1514	1259	1241	2564	1167	1655	1239	2500	5657	1347	1530	1494	2824	2425	1754
COBS00929	1	21	8	99	80	5	56	26	33	43	34	40	191	88	156	50	154	141	149	55	62	156	125	53
COBS00930	11757	6953	8387	9215	12548	3832	15169	14181	8008	14251	13637	3393	8191	5923	8702	2879	7993	22678	8778	5216	3803	7065	11252	3589
COBS00931	3915	4549	3689	3746	6326	1862	6031	5268	4680	6358	5831	2939	11943	5570	8419	2706	12165	17087	7627	4763	3822	11230	9153	3880
COBS00934	549	302	806	658	625	450	332	396	624	1329	487	175	907	531	815	191	889	3055	1001	351	308	973	1859	309
COBS00936	0	4	11	27	6	13	0	7	0	23	0	10	2	7	46	1	42	38	21	17	0	4	19	1
COBS00937	168	687	431	1089	1304	310	710	1026	548	916	600	737	1606	678	1311	633	1601	1819	1149	859	872	1741	1296	773
COBS00938	0	41	37	131	363	11	98	10	204	89	101	161	747	502	277	107	1074	70	649	42	33	718	168	54
COBS00939	0	1	17	3	36	17	10	19	39	29	29	9	27	39	60	3	22	27	59	4	7	101	44	1
COBS00940	2073	2737	1964	1396	1799	1817	1457	1659	3850	2196	1528	1492	3947	1795	2511	1691	3858	6819	2652	1543	1722	4520	3891	2157
COBS00941	99	461	266	271	313	133	394	343	458	571	351	311	605	399	316	242	580	1241	470	288	302	638	693	343
COBS00942	1	397	6207	285	513	5298	1965	631	601	551	391	303	937	452	510	263	968	1553	847	344	318	973	919	340
COBS00943	814	2623	1214	1552	2383	539	2443	2191	3833	2158	2139	1699	4896	2157	2392	1422	4837	4615	2706	2173	2258	5570	2571	1884
COBS00944	0	9	13	0	9	0	11	0	0	0	9	0	2	0	1	0	2	0	0	1	1	5	1	1
COBS00945	312	308	126	309	765	84	413	371	2133	416	368	118	1679	257	963	144	1327	289	291	183	209	1850	345	241
COBS00946	0	14	32	0	5	5	16	12	0	37	48	3	3	2	3	2	4	27	4	2	0	3	13	7
COBS00949	0	0	2	3	2	2	5	22	0	0	0	0	0	2	2	0	2	11	6	0	0	1	6	0
COBS00952	605	138	138	394	599	88	255	353	352	321	309	115	1495	354	735	118	1308	343	438	169	175	1494	487	175
COBS00953	0	0	13	4	1	8	0	1	0	1	0	0	6	4	3	2	3	5	4	0	0	6	6	1
COBS00954	0	0	29	0	2	12	28	0	0	23	22	4	7	4	21	1	8	197	11	9	3	11	90	7
COBS00960	0	0	21	0	4	16	4	0	9	11	5	0	25	10	18	3	9	119	20	6	2	25	38	3
COBS00961	239	192	161	371	1078	126	256	206	745	368	251	160	1752	636	1240	121	2620	532	814	224	142	1492	584	161
COBS00962	0	50	14	76	111	3	31	35	27	25	25	8	86	51	119	5	186	20	42	16	18	107	41	10
COBS00963	0	12	3	44	200	7	29	12	0	64	14	10	159	56	102	6	227	46	66	14	15	58	11	27
COBS00964	0	15	0	0	26	0	8	0	0	2	0	0	52	1	24	2	20	3	3	5	9	3	0	8
COBS00965	0	364	53	82	474	42	36	55	792	85	19	124	1508	62	1045	218	1077	125	64	311	498	1867	93	427
COBS00966	240	445	113	112	242	87	106	147	741	187	62	505	616	176	819	499	786	954	234	751	926	1305	623	1063
COBS00970	0	3	6	49	70	18	31	28	48	27	51	2	4	9	33	2	12	11	15	9	3	3	14	4
COBS00971	744	1211	772	2008	4054	709	1253	1418	3674	1205	1480	1108	8342	2931	8141	1717	8168	5571	4097	2605	2666	9362	3601	2867
COBS00972	214	69	185	582	362	105	691	844	393	622	709	19	625	281	612	30	570	532	813	38	48	562	1069	43
COBS00973	1523	961	1394	2516	3578	856	2826	2894	1412	3822	3659	597	4214	2291	2772	517	3573	5686	3508	1265	720	3053	4668	801
COBS00974	0	8	0	6	7	7	11	2	0	11	14	4	37	17	16	1	36	22	35	8	8	37	15	4
COBS00975	168	2240	1047	1121	1857	529	1378	1165	3564	1887	1315	1464	6938	2437	2601	1402	6075	4362	3049	1471	1739	7261	2892	1574
COBS00976	0	86	31	27	113	18	76	57	53	83	102	58	266	117	210	42	230	155	172	67	50	198	129	54
COBS00977	151	591	176	945	1986	134	952	767	960	633	1022	255	1640	853	1305	292	2091	523	1130	705	588	1717	769	469
COBS00978	1488	1825	1301	5277	2281	975	5661	5321	1867	4911	5507	1422	3649	5374	3436	1653	4456	6657	7705	2125	1812	3666	8037	1921
COBS00979	0	13	15	60	35	16	86	78	0	47	180	14	36	47	40	11	60	95	110	18	12	40	100	11
COBS00980	274	8	185	631	54	186	1315	783	20	783	960	19	145	514	133	14	115	679	863	20	25	119	660	18
COBS00981	1147	1372	889	1229	765	496	1699	1783	959	1580	1657	1036	2131	1451	1382	953	2186	4399	2123	1244	1256	2266	2939	1136
COBS00982	951	1413	645	723	844	352	1372	1354	1082	1795	1045	981	2415	1416	1410	1040	2512	3763	1735	1161	1364	2659	3147	1252
COBS00983	1329	4027	2573	2405	1569	1679	3379	3630	2524	2942	2728	3096	4873	3145	1933	3471	4645	7982	4162	2926	3358	5005	5323	2945
COBS00984	222	950	816	354	387	303	616	420	595	786	636	720	1050	615	417	625	1087	2528	799	612	767	1107	1120	940
COBS00985	0	12	44	35	16	27	26	29	60	67	15	9	22	4	40	12	12	47	20	22	12	14	27	29
COBS00989	1	12	1	0	7	0	3	5	1	4	0	4	6	2	1	1	7	6	0	9	2	5	8	0
COBS00990	403	176	217	416	757	158	289	329	968	389	438	79	347	147	570	145	404	456	209	162	146	350	323	147
COBS00991	863	1151	726	1684	2393	715	979	1165	2648	982	1268	735	2716	1068	3839	1489	2975	2956	1858	1628	1539	3269	2117	1871
COBS00992	0	21	0	39	33	18	26	8	1	16	4	11	37	4	59	15	45	38	17	25	26	26	26	27
COBS00994	0	11	1	1	2	0	1	0	0	0	0	1	1	2	5	1	7	7	3	8	0	3	4	0
COBS00997	7	67	57	142	281	77	95	60	129	90	126	86	360	135	493	179	242	419	177	252	263	356	306	209
COBS00998	0	15	13	14	83	14	11	20	0	26	2	36	97	46	167	62	74	156	61	84	72	96	107	50
COBS00999	0	7	0	32	34	3	21	35	0	12	15	2	91	73	37	3	145	6	91	5	8	94	34	13
COBS01000	120	7	104	458	2271	55	399	149	513	420	749	5	1492	1149	504	1	4142	136	1930	5	2	5500	576	2
COBS01001	353	219	532	1571	489	284	1748	1721	414	2428	2749	111	1812	1976	477	102	1803	948	2832	142	122	1185	1996	119
COBS01002	0	176	64	164	2474	42	113	131	1930	158	155	93	86669	188	15948	214	41515	209	296	406	210	89611	177	291
COBS01003	1046	1022	792	1374	1846	422	1642	1735	1988	1818	1974	683	2666	1016	2611	678	2618	2989	1903	1465	1286	2846	2572	1054
COBS01004	0	0	33	43	18	17	64	61	0	129	62	3	267	92	15	2	58	34	181	7	2	92	152	3
COBS01005	0	230	105	154	324	62	408	241	601	363	328	155	604	301	299	151	610	432	306	204	296	834	324	310
COBS01006	9889	34142	5119	4243	2659	3001	6881	6298	8701	6740	4886	9343	7597	2972	2376	13837	7469	12751	3204	11339	16070	10560	6451	21059
COBS01007	249	4	2	0	30	0	0	0	69	0	3	11	16	2	57	10	25	19	0	22	21	25	5	25
COBS01008	0	1	1	5	5	4	17	1	11	5	8	2	1	1	0	1	0	3	4	8	9	1	4	6
COBS01010	0	0	0	5	0	1	5	0	0	11	0	8	6	3	3	1	13	5	11	20	7	17	10	8
COBS01011	0	2	5	0	4	0	1	0	68	12	6	4	5	2	2	2	6	5	3	15	6	8	2	2
COBS01012	0	9	13	7	40	10	29	42	184	46	9	20	38	5	55	6	34	26	28	39	1	126	16	2
COBS01014	0	36	28	37	33	21	14	10	25	25	36	33	42	14	114	10	59	40	26	60	16	232	38	8
COBS01015	1	8	4	7	1	2	3	0	150	2	1	4	4	0	87	0	2	4	1	3	11	144	2	28
COBS01016	3	536	104	194	999	113	425	368	541	405	179	244	959	160	559	264	998	690	184	248	472	1751	530	522
COBS01017	634	1173	406	1043	1807	311	852	950	2149	1153	1087	831	3708	1429	3059	988	3786	3692	2124	1234	1195	4520	2726	1299
COBS01018	382	445	521	1701	833	264	2279	2423	597	3299	2971	152	736	1657	629	163	1036	1207	2165	346	294	774	3316	319
COBS01019	5219	2259	1899	3534	530	1080	2924	4469	2104	2669	1065	894	2045	1294	1742	1072	1231	8936	2622	960	1095	2400	6230	1319
COBS01020	0	11	2	12	6	1	12	3	0	0	6	0	3	1	6	1	1	6	7	5	0	8	7	1
COBS01021	0	127	14	9	134	7	25	44	2491	42	43	76	109	50	3244	42	182	101	58	32	33	477	72	30
COBS01022	3	1200	111	438	3617	105	395	186	6087	361	475	1698	14296	1254	13725	2601	16844	1065	1883	5061	6130	31163	1107	4538
COBS01023	0	0	0	0	2	0	6	0	27	0	0	0	10	0	4	1	6	1	4	1	1	10	0	2
COBS01024	8	92	5	32	830	10	0	10	3533	6	0	90	2359	14	1450	159	2200	4	10	192	300	2439	6	358
COBS01025	2	6321	8	322	85	7	24	53	2341	12	13	3935	776	1589	872	5414	41	1	17	2278	3644	368	52	3547
COBS01026	0	39	1	1	0	9	4	3	162	3	0	8	2	1	6	9	2	3	3	4	3	68	0	7
COBS01027	1	14	8	38	24	13	46	21	8	21	18	2	34	9	34	2	38	79	36	2	0	30	45	3
COBS01028	0	0	22	2	7	14	4	7	0	15	19	3	4	7	3	2	14	8	5	1	1	9	11	1
COBS01030	0	1	0	3	0	3	0	0	0	11	0	1	4	2	2	0	0	0	2	0	1	136	0	0
COBS01031	1124	2253	887	3881	3041	645	1432	1602	2110	1447	1542	1471	4430	6479	4321	2310	6195	6191	7406	4121	4321	4580	4031	3761
COBS01034	0	36	18	150	182	30	66	51	0	60	66	36	58	145	199	31	128	125	214	112	88	60	129	54
COBS01035	2	44	27	217	320	20	84	59	43	95	198	70	142	255	321	76	240	235	360	190	139	107	150	104
COBS01036	11	32	9	140	132	18	19	31	4	47	31	44	102	149	232	77	190	185	257	106	101	63	145	74
COBS01038	2	7	20	39	28	13	19	36	6	13	39	7	5	5	17	2	2	13	5	11	4	2	18	5
COBS01039	0	13	33	173	251	32	87	92	44	123	111	48	34	45	162	23	75	105	99	98	30	30	88	16
COBS01040	1	9	6	5	7	1	14	7	0	2	0	5	4	4	7	5	5	19	12	4	11	13	16	5
COBS01042	0	139	100	115	145	28	131	151	294	151	111	285	625	292	382	297	743	684	423	275	365	799	491	387
COBS01043	970	1105	525	886	475	319	1252	1388	460	2747	1072	1924	2834	2867	896	2926	2733	2805	4014	1562	2476	3155	7631	2777
COBS01044	1092	549	2685	394	145	1481	244	449	820	2093	153	423	1206	3790	757	105	60	9441	385	270	181	511	3036	374
COBS01045	0	0	13	8	5	18	2	2	3	23	14	20	45	11	123	11	32	167	7	24	29	279	52	17
COBS01046	416	464	239	602	406	154	453	545	1200	467	550	574	1500	781	833	522	1595	953	977	639	711	1814	1252	637
COBS01047	244	1323	268	340	160	164	724	710	646	1260	404	1124	461	605	250	2656	541	1658	804	2684	3829	543	2338	3355
COBS01048	636	70	32	297	215	24	120	114	115	167	186	181	564	764	334	28	231	94	320	107	43	249	197	36
COBS01049	137	382	66	666	455	57	543	522	430	496	615	400	1615	1184	1008	327	1810	730	1483	508	498	1756	1222	430
COBS01050	0	3	6	7	23	2	23	41	2	7	28	23	24	20	16	8	36	57	21	14	18	49	48	5
COBS01051	2612	23533	1620	1837	1177	1166	2438	2647	3992	2783	1453	8736	4935	2458	1698	12966	4554	8519	3185	10850	15643	8087	5935	4461
COBS01052	410	622	503	811	830	286	1056	963	1048	1154	1194	588	2505	1703	1562	527	2828	2426	2408	1028	899	2635	2060	776
COBS01053	1	1	0	24	16	2	6	11	0	14	1	4	62	45	38	9	83	51	38	38	21	149	74	20
COBS01054	695	1800	1137	1481	2577	554	2830	2442	2822	2849	2665	1260	4259	2607	2576	1283	4760	3505	3426	1626	1639	4348	2573	1603
COBS01055	3	552	240	257	317	156	353	387	528	416	328	425	656	431	294	340	547	968	318	329	444	722	457	412
COBS01056	420	217	204	1196	1029	154	958	994	588	694	1097	174	1598	1156	1769	212	1905	1179	1855	612	385	1863	1730	351
COBS01058	1673	971	1263	1560	1132	677	2468	2596	566	2499	2664	843	3087	2833	1517	575	3363	7320	4150	1691	1184	3403	4778	911
COBS01059	269	791	526	1146	323	274	1523	1359	265	1242	1167	1117	1471	1952	626	1460	1979	3606	2433	968	651	1819	3257	1367
COBS01060	1129	2491	1538	1385	934	775	2135	1888	2126	2420	1865	2123	2744	1959	1834	2768	2923	7615	2362	2149	2884	3592	4137	3895
COBS01061	214	111	124	188	371	62	256	154	247	195	181	234	874	349	748	156	911	1145	469	261	198	904	500	190
COBS01063	6221	4491	3511	4323	8040	1928	6220	5799	7403	6137	6439	1984	6937	3321	6568	1857	7469	10695	4780	3763	2842	7882	6014	2881
COBS01064	0	3	0	8	16	2	17	0	0	17	21	11	21	7	15	12	28	17	18	12	13	26	20	15
COBS01065	1148	1039	362	1196	1360	269	1246	1169	1190	1376	1155	671	1736	799	1817	697	1789	1900	1190	975	918	2285	1894	682
COBS01066	0	18	15	169	70	26	188	176	41	84	132	13	109	107	103	33	133	94	181	55	56	121	208	48
COBS01067	173	7	4	20	17	0	9	14	0	17	15	6	18	20	61	6	37	41	33	14	13	36	49	14
COBS01068	0	1	23	6	12	2	9	0	0	14	10	1	5	6	16	3	5	11	5	2	4	3	16	1
COBS01070	545	767	356	1538	2027	305	1199	1190	1468	1012	1825	347	1429	1386	1958	401	2004	652	2281	842	746	1546	1268	640
COBS01071	0	5	0	0	12	4	10	0	0	5	2	4	6	11	13	1	2	12	17	5	2	10	13	2
COBS01072	341	110	61	263	519	22	399	412	456	326	746	21	214	236	239	21	345	98	335	72	53	210	192	30
COBS01073	0	321	175	348	273	131	443	353	316	588	368	619	1069	548	467	670	1038	1263	791	514	689	1294	979	767
COBS01074	666	589	318	231	249	162	346	298	499	455	426	305	428	236	241	256	460	1009	315	332	330	563	567	377
COBS01075	237	146	76	76	205	23	108	104	196	127	102	92	340	106	236	128	336	556	115	137	168	404	256	201
COBS01076	11	119	87	62	101	37	135	146	177	134	124	145	287	162	181	128	352	422	175	192	172	407	280	156
COBS01077	1115	814	139	3945	115	190	4	0	110	3	0	4084	2885	10974	761	1	187	8	8	5	2	120	6	7
COBS01078	836	1926	529	1196	3804	324	1129	1122	3868	1329	1333	1163	5867	1632	5417	1655	5242	2209	1855	2637	3253	6986	2003	3148
COBS01079	410	0	3207	0	7	3940	256	340	0	8	1	0	5	2	14	1	1	11	58	3	1	4	3855	3
COBS01080	80	7	1	22	30	3	98	11	84	21	3	0	2	5	5	0	0	6	1	1	0	0	7	0
COBS01083	3	578	576	298	624	257	476	391	686	672	427	262	1098	502	863	248	1144	2691	476	570	512	1342	892	495
COBS01084	240	765	352	605	868	208	873	695	1065	842	775	423	1121	582	760	563	1406	1175	774	749	889	1616	972	562
COBS01085	1	261	142	343	150	107	437	480	180	382	351	512	1456	1029	494	561	1399	2051	1004	643	826	1673	1388	761
COBS01087	10	363	214	135	197	249	329	238	229	530	289	419	1000	499	370	502	804	896	604	357	556	1203	1533	730
COBS01088	10	0	51	33	54	60	85	72	64	47	53	17	107	50	64	3	109	69	56	12	13	114	64	15
COBS01089	632	339	168	240	273	87	429	437	552	503	403	309	812	519	351	329	882	779	531	250	448	1054	682	496
COBS01090	233	462	158	138	241	130	180	178	331	301	92	703	802	268	431	525	693	1251	401	539	703	951	651	850
COBS01091	0	136	49	95	156	33	95	118	128	124	74	159	238	85	130	132	217	189	106	96	131	342	103	147
COBS01092	0	139	18	61	2973	8	73	40	1523	38	64	30	2747	147	624	49	783	39	278	73	112	1703	51	107
COBS01093	253	1242	807	826	2104	389	1110	1374	1797	1417	1133	1074	3189	1064	2143	1030	3167	2883	1356	1397	1562	3936	1582	1394
COBS01094	0	52	20	19	20	6	25	9	1	53	73	27	58	26	37	8	31	46	30	21	18	54	13	34
COBS01095	7	824	390	358	283	118	786	631	171	1040	958	858	927	790	417	888	945	1335	1141	544	770	915	1480	1185
COBS01096	0	92	95	87	106	36	155	177	177	440	122	333	669	458	250	378	570	437	663	177	252	830	1373	369
COBS01097	11	1780	288	41	0	187	99	100	15	18	90	66	15	53	13	3589	3	1551	23	1425	979	8	236	1521
COBS01098	542	1239	530	1578	949	577	862	1109	1166	1138	896	962	2584	1644	2613	1369	2500	4337	2592	2275	1673	2054	3366	2179
COBS01099	1	1	3	71	38	19	15	26	0	1	26	39	60	43	131	45	63	118	59	60	47	70	137	44
COBS01101	3	34	27	179	107	33	27	54	43	71	46	44	116	56	179	74	109	153	80	78	101	84	139	68
COBS01102	4	8	6	13	8	2	15	6	1	6	2	3	2	5	1	7	0	6	6	2	3	1	13	1
COBS01103	0	37	20	192	21	20	6	21	38	25	12	7	15	3	9	6	11	11	8	3	0	13	3	2
COBS01105	1742	3100	926	965	1078	548	1843	1731	1871	1298	1045	1516	2812	1593	933	1363	2673	3340	1942	1100	1282	2710	2191	1667
COBS01106	0	13	0	4	8	1	3	9	1	9	7	7	10	2	9	4	14	8	7	2	2	14	6	4
COBS01107	1950	1724	1263	606	1159	551	1118	1102	2591	1496	1101	928	1734	748	1178	814	1662	3702	873	1026	1167	1857	1445	1260
COBS01108	1	114	230	1	21	121	3	8	1	26	0	18	12	5	68	15	10	2717	56	10	5	65	481	212
COBS01109	186	48	220	273	186	72	314	287	1126	276	143	20	255	72	599	25	291	601	154	41	27	874	307	34
COBS01110	2	0	0	23	4	8	20	13	1	22	21	2	6	12	2	2	13	32	22	5	3	10	15	0
COBS01111	0	30	14	52	13	8	35	31	0	26	16	6	41	37	15	5	43	89	60	13	13	56	56	12
COBS01112	0	22	3	7	3	0	16	4	0	1	0	31	7	1	34	15	9	78	4	51	37	21	43	13
COBS01113	1	23	5	25	16	5	17	62	0	14	0	11	47	49	37	17	54	27	65	28	20	78	42	25
COBS01114	92	1	18	6	15	0	16	17	0	16	0	18	17	9	28	11	26	84	14	41	25	26	41	16
COBS01115	6	341	179	168	226	116	182	205	295	184	123	308	470	204	339	391	443	818	234	328	398	592	402	487
COBS01116	1169	1109	1035	744	1305	463	1518	1423	2820	1531	1398	725	2055	1010	1684	662	2212	3546	1384	1137	1198	2399	1678	1114
COBS01117	0	0	0	18	2	0	1	3	0	7	0	0	2	0	0	0	0	1	0	1	1	3	1	0
COBS01118	0	23	26	45	19	6	55	38	50	100	6	34	87	86	68	46	138	93	106	42	38	132	157	44
COBS01119	53	138	167	226	80	33	290	261	91	710	275	97	216	199	86	116	266	412	291	78	123	199	1066	161
COBS01120	1204	10187	717	1236	496	391	1730	1755	1802	1996	1448	4470	1708	1543	1088	5698	1828	3674	2634	4657	7421	2178	3435	3293
COBS01121	124	424	142	295	367	97	380	335	557	383	423	473	829	401	590	324	1245	764	562	806	577	986	651	378
COBS01122	3124	2722	1957	1879	3907	898	3510	3277	3877	3665	3936	1233	4154	2620	3253	1312	4616	5956	3166	2080	1841	4444	3174	1513
COBS01123	0	0	0	10	3	1	1	2	0	4	13	3	1	1	4	3	0	8	2	4	2	3	9	3
COBS01124	237	553	443	288	593	190	488	381	764	438	466	627	1432	462	700	495	1346	1538	571	551	708	1592	651	787
COBS01125	0	378	197	211	223	102	252	205	387	283	198	310	520	196	202	372	513	697	281	294	343	745	418	393
COBS01126	506	1320	542	575	749	314	1157	1041	1339	1435	1233	1032	2114	1346	904	1279	2100	2384	1660	1116	1361	2760	2072	1263
COBS01127	400	162	324	370	58	162	623	464	143	415	414	113	304	392	195	239	306	2204	660	202	305	421	1307	379
COBS01128	763	306	162	987	1890	165	699	603	1189	523	769	203	2274	918	2679	350	2652	558	1568	478	570	3001	919	482
COBS01129	109	150	100	109	90	71	142	194	311	208	189	177	364	168	154	193	346	497	202	137	189	449	389	205
COBS01130	576	850	327	501	1003	253	628	595	793	682	589	687	2309	1027	1561	889	2429	2317	1379	1322	1308	2776	1584	1409
COBS01131	329	199	89	303	504	74	332	335	263	333	404	112	585	286	505	116	679	526	435	230	217	646	409	254
COBS01132	0	0	0	0	1	2	6	0	0	2	14	2	3	8	4	1	5	8	7	18	0	2	6	0
COBS01133	0	12	2	51	79	20	40	48	94	46	49	23	86	41	199	24	106	126	117	79	35	94	134	22
COBS01134	0	14	28	167	105	23	23	47	0	41	50	32	70	41	280	20	65	117	107	48	27	63	147	19
COBS01135	0	20	22	88	225	17	68	94	23	93	110	16	69	58	199	25	79	118	96	53	42	69	89	25
COBS01137	0	16	2	47	26	0	7	19	1	0	3	6	36	13	82	12	28	34	16	22	11	15	47	10
COBS01138	657	190	54	766	2	40	0	2	0	0	1	12	7	17	4	1	1	1	0	1	0	0	12	0
COBS01139	154	39	5	65	128	16	71	46	161	66	83	21	77	54	197	32	71	111	91	53	29	94	106	29
COBS01143	0	0	2	5	15	0	1	0	0	0	0	0	1	6	1	0	5	3	2	2	2	2	4	0
COBS01144	644	585	497	2503	10428	393	1794	2125	2467	1707	1904	425	7558	2382	5157	440	7867	1921	3666	1007	633	8495	2284	510
COBS01145	2	19	34	176	207	51	65	58	43	76	106	30	66	43	231	11	99	132	99	75	43	69	110	34
COBS01146	0	61	126	234	546	86	187	235	66	200	275	119	251	175	829	95	327	474	316	201	122	290	479	126
COBS01147	372	359	354	696	1682	216	1051	884	809	924	979	399	1331	853	1805	379	1497	1574	1254	662	541	1498	1266	507
COBS01148	827	952	970	589	930	534	760	636	782	1018	766	995	2527	1015	1205	738	2294	5315	1200	1267	1149	2813	2313	1298
COBS01149	440	231	138	211	243	101	237	214	373	235	358	561	1569	647	964	593	1709	1499	813	668	851	2019	1126	889
COBS01150	616	4913	1556	1597	2065	846	2567	2927	2115	2670	2531	3962	8118	3769	3635	5467	7794	8670	4272	3331	5234	10001	5276	6411
COBS01151	1776	1448	785	662	1028	437	984	828	1539	1077	1007	693	1892	869	1115	710	2015	3633	1093	824	899	2071	1578	1095
COBS01152	298	767	520	545	1058	371	877	776	2176	844	804	451	1276	540	664	441	1586	1313	675	462	576	1895	696	531
COBS01153	4	56	199	122	78	58	135	137	94	207	157	34	533	311	89	24	334	309	545	73	31	408	339	29
COBS01154	0	743	236	368	435	75	657	536	466	628	532	490	1150	609	481	426	1130	1002	682	456	565	1115	664	533
COBS01155	112	394	390	643	1111	209	593	350	1255	548	638	209	4501	1127	1666	339	2805	2257	1636	332	549	4370	998	478
COBS01156	0	14	13	8	14	2	15	5	2	16	40	6	34	7	30	2	28	21	11	10	7	51	9	5
COBS01157	0	11	0	6	39	1	16	5	66	22	8	5	180	38	85	5	145	47	40	23	30	259	46	42
COBS01158	0	210	693	523	78	423	1471	1073	112	1016	772	200	80	333	76	194	100	1159	605	131	247	114	1391	168
COBS01159	851	245	761	1916	238	324	4936	4165	60	3100	2595	134	244	1166	194	85	333	2799	1750	111	100	270	3549	139
COBS01160	1305	2298	820	1655	1125	576	2441	1734	1221	2535	2465	2045	2541	2383	1838	1397	3680	6355	3743	2144	2147	2416	5369	1907
COBS01161	603	1226	749	451	416	396	800	643	817	817	605	1296	1352	672	1053	1749	1298	3750	782	1270	2175	2227	1803	2886
COBS01162	1064	35	143	76	12	66	354	413	45	361	289	9	49	116	21	24	63	434	137	32	41	73	492	29
COBS01163	2602	1743	1550	3630	3269	1145	2820	3612	2068	3412	3753	1517	6056	3813	4995	1529	5479	7751	6043	2070	1661	5736	6041	1937
COBS01165	0	0	0	19	11	0	0	6	30	1	0	1	0	3	4	0	1	10	2	4	1	0	10	0
COBS01166	0	0	0	7	7	3	0	11	0	14	1	0	4	4	12	1	1	15	3	2	0	3	8	0
COBS01167	0	0	0	38	32	9	19	34	0	7	29	9	13	12	87	12	26	77	30	17	3	16	84	8
COBS01169	286	0	10	40	61	15	41	54	0	38	55	16	30	37	103	10	21	88	48	29	8	28	111	12
COBS01170	103	12	59	158	200	28	93	153	0	115	133	32	62	91	310	26	91	257	130	52	38	69	306	36
COBS01172	287	2	48	179	237	80	163	144	0	146	113	47	83	53	310	33	84	281	138	84	48	83	295	59
COBS01173	0	3	2	43	68	21	10	36	0	56	62	24	40	59	253	16	63	189	90	65	27	83	205	35
COBS01174	884	759	426	1022	455	305	1293	1064	600	2671	1250	569	908	809	393	797	937	898	1295	290	553	1160	3391	713
COBS01175	0	15	6	107	198	11	104	104	81	36	146	13	221	145	194	9	342	53	199	38	42	259	100	16
COBS01176	0	0	29	53	17	35	36	81	0	70	41	12	5	10	12	4	3	71	27	15	1	6	43	5
COBS01177	0	47	33	105	4	21	133	177	58	151	132	133	70	185	81	220	71	273	262	105	180	112	442	166
COBS01178	0	142	131	132	25	66	171	276	114	101	24	188	155	164	192	239	324	830	222	174	262	432	575	194
COBS01179	482	983	406	253	461	201	471	429	991	489	406	610	856	338	744	545	961	1510	385	729	758	1407	896	887
COBS01180	1468	1013	1275	249	815	508	382	447	1253	889	340	919	1247	299	1388	626	1045	4347	303	1500	1054	1440	1252	1243
COBS01181	685	892	455	495	839	233	692	834	754	784	712	803	2146	934	1290	845	2126	3082	1090	999	1134	2440	1564	1142
COBS01182	157	428	170	257	553	71	483	421	420	448	496	367	1309	544	633	355	1460	909	715	399	431	1625	654	371
COBS01183	4664	17152	2338	1157	989	1148	1874	1840	7462	2346	1566	7563	3567	1817	954	7389	4774	4646	1788	7688	7053	6000	2887	6177
COBS01184	1331	1227	1428	356	613	699	597	568	1188	624	423	646	1728	570	1173	681	1760	8523	748	884	1102	2486	2243	1411
COBS01185	529	970	634	801	1156	336	1595	1428	1491	1513	1423	601	1787	1091	1040	559	1722	2426	1267	642	704	1966	1230	707
COBS01187	275	352	170	236	179	105	501	482	283	406	366	363	804	692	457	355	964	1284	882	393	387	821	1310	548
COBS01188	0	143	72	55	62	32	137	120	101	145	82	785	879	535	382	854	889	1384	575	590	1163	1128	932	1058
COBS01189	173	815	494	706	1335	281	863	746	693	1028	701	914	1654	963	2047	565	2677	3272	1290	1490	1106	1756	1409	1188
COBS01190	346	72	83	1086	788	106	776	671	87	503	633	81	722	1099	889	56	1154	921	1673	264	87	693	1349	59
COBS01191	1192	1731	1474	771	1363	424	1273	1200	3153	1507	1098	967	2425	1035	1821	1073	2736	4048	1214	1382	1437	3053	2072	1663
COBS01192	1355	1196	797	821	1058	346	1042	1188	1642	1104	1097	1037	2576	1284	1504	1159	3096	3565	1789	1249	1299	2890	2230	1318
COBS01193	983	2320	1718	1492	997	764	2092	2123	2867	1540	1083	1587	3427	2476	1232	1385	3538	3492	3481	1547	1309	3386	3776	1205
COBS01194	316	733	210	199	392	93	369	453	161	330	416	1344	1520	894	695	1825	1642	1713	1021	865	1765	1993	1157	1909
COBS01195	0	9	24	1	6	1	18	2	1	34	17	0	1	5	0	1	3	0	1	1	0	1	2	0
COBS01206	0	0	8	2	0	5	9	13	0	7	0	0	0	0	0	0	1	11	4	0	0	0	5	0
COBS01207	0	0	0	9	0	0	18	3	0	3	6	0	0	3	0	0	0	20	5	0	0	0	13	0
COBS01209	11810	0	45523	8	2	29767	3098	5490	0	1	11	0	0	4	2	2	1	5	613	15	5	0	18327	9
COBS01212	0	0	9	4	0	0	9	12	0	1	2	0	0	2	0	0	0	9	3	0	0	2	4	0
COBS01213	954	0	19	13	0	10	20	923	0	11	4	871	2	3	0	539	0	7	5	1709	0	0	76	16
COBS01214	0	0	25	20	0	7	59	23	1	13	19	0	0	5	0	0	0	24	6	2	0	0	28	0
COBS01215	1	0	0	14	0	0	10	27	0	8	6	0	0	3	3	0	0	23	10	0	0	0	27	0
COBS01216	0	0	102	0	0	27	2	1	0	0	0	0	0	0	0	0	0	1	2	0	1	0	2	0
COBS01217	0	0	0	9	1	0	6	0	0	14	5	0	0	1	1	0	0	3	1	0	0	0	2	1
COBS01220	652	173	129	3445	601	467	246	336	230	165	161	97	43	39	75	128	47	62	46	92	105	154	128	128
COBS01223	0	16	0	11	2	1	0	0	152	0	0	17	4	16	427	16	8	0	38	7	0	17	3	5
COBS01224	0	0	6	3	6	7	8	2	1	21	4	0	22	4	14	1	12	28	4	4	1	31	14	1
COBS01227	0	8	8	0	15	1	12	2	0	18	10	0	1	0	3	0	1	37	0	0	0	1	10	0
COBS01228	0	0	11	0	1	1	0	2	0	5	0	1	0	0	1	0	0	28	0	1	0	1	12	0
COBS01230	63	0	11	0	0	3	1	0	0	1	0	0	0	3	1	0	0	0	0	0	0	1	2	0
COBS01232	0	0	0	14	7	3	31	25	0	5	31	7	10	59	9	17	15	41	47	7	37	19	56	6
COBS01233	1	14	45	55	16	23	144	214	0	114	117	22	51	110	18	30	50	114	98	34	75	54	92	19
COBS01234	0	0	1	0	0	12	0	0	0	0	0	0	1	0	0	0	0	6	0	0	0	0	1	0
COBS01235	223	0	173	0	0	146	12	1	0	1	0	0	1	0	1	0	0	1	1	0	0	0	7	0
COBS01244	2	12	1	5	0	8	1	1	1	0	0	0	1	1	0	0	0	1	1	0	0	0	0	0
COBS01245	0	1	3	22	0	17	0	4	0	12	12	0	0	11	2	0	0	20	12	3	0	0	18	0
COBS01252	228	0	0	0	0	0	2	1	0	0	0	0	1	0	5	0	0	7	3	0	1	3	5	0
COBS01253	0	0	9	4	3	8	5	7	60	0	4	1	1	5	5	1	4	11	7	2	4	6	6	1
COBS01259	0	2	11	0	4	13	2	1	0	26	0	4	4	0	5	0	9	55	5	1	5	22	29	3
COBS01261	0	0	8	0	0	6	1	0	0	23	0	9	12	4	8	2	13	99	11	0	3	23	12	3
COBS01272	0	0	68	0	4	17	10	0	0	0	0	0	0	0	0	0	0	0	0	0	0	0	2	0
COBS01274	0	0	4	0	1	6	0	21	0	0	0	1	1	0	1	1	1	31	3	3	0	2	11	0
COBS01279	2	0	0	0	0	4	1	72	0	0	0	536	0	0	2	149	0	7	11	4399	0	0	115	15
COBS01280	0	0	0	3	0	3	1	12	0	0	17	0	1	0	0	0	0	7	0	3	0	0	1	0
COBS01281	41	0	6	1	0	11	0	1	0	0	10	0	0	0	0	0	0	4	1	2	3	1	17	0
COBS01282	3	154	86	59	103	44	198	198	112	200	85	64	201	93	95	44	171	195	127	44	53	196	149	61
COBS01286	1	49	11	179	0	35	1	5	0	7	0	1	0	6	1	0	0	12	0	0	1	1	5	2
COBS01289	0	0	11	5	4	14	0	0	0	0	0	0	1	0	1	0	2	9	1	0	0	0	2	0
COBS01292	0	0	16	0	0	9	0	0	0	11	0	0	0	0	0	0	0	1	0	0	0	0	0	0
COBS01296	846	777	439	611	748	282	633	685	889	783	766	566	1358	682	1096	481	1507	1899	919	775	770	1512	1223	687
COBS01297	1585	887	776	1264	1036	443	1160	1187	911	1427	1304	667	3172	1853	2107	746	3809	4523	3062	1549	1355	3879	3984	1136
COBS01299	45	191	73	148	99	32	283	240	136	408	193	131	377	353	59	76	449	246	392	111	195	334	383	110
COBS01300	1248	3952	1034	959	943	530	1388	1898	2175	1427	872	3715	3172	1484	1312	5579	3601	4250	1752	3642	5121	6337	3479	4872
COBS01301	0	320	134	228	283	65	313	302	296	390	323	272	609	329	313	280	698	679	489	401	362	836	462	325
COBS01302	222	293	174	613	912	99	832	818	697	487	995	49	632	607	556	40	866	241	817	190	131	720	393	95
COBS01303	0	27	17	73	104	8	64	74	39	55	123	7	58	70	81	0	71	41	86	12	11	46	39	8
COBS01304	5	62	42	517	914	40	290	267	138	239	356	45	794	536	1013	54	1006	182	912	165	99	551	392	57
COBS01306	0	0	6	56	41	2	14	37	0	12	24	5	27	53	73	2	60	22	100	17	9	16	29	2
COBS01309	348	1183	435	1127	1516	222	937	952	625	1122	1047	871	3882	1892	1696	906	3144	1657	2615	756	1354	3773	2130	1090
COBS01310	1	1	26	14	10	3	12	2	67	14	14	1	4	4	42	0	12	11	12	3	3	47	10	2
COBS01311	417	71	134	590	602	94	714	745	418	528	866	67	918	1264	567	63	1478	582	1902	211	131	896	814	80
COBS01312	1086	1340	446	460	1114	275	625	604	2252	823	711	788	2208	661	1311	917	2292	2188	823	1075	1080	2872	1152	1341
COBS01313	186	626	308	426	565	189	593	489	631	529	523	401	1818	692	874	347	1827	1967	928	639	715	1660	814	544
COBS01314	1	343	131	97	191	65	273	244	330	314	219	222	471	289	274	244	528	666	348	247	264	597	509	328
COBS01315	1	442	186	544	1250	243	397	361	1156	521	560	204	2343	1073	1256	234	2821	1042	1388	346	318	2389	789	346
COBS01316	3	15	1	17	2	5	1	1	0	3	0	2	1	3	13	3	2	8	5	14	5	4	10	0
COBS01317	0	2	1	1	8	7	15	5	0	3	0	10	4	10	47	1	6	22	10	25	2	49	14	4
COBS01318	361	783	490	894	1075	364	1154	1152	2413	1441	1096	661	4006	3106	2978	1027	4261	2343	3998	1327	1653	6460	3638	1194
COBS01319	663	912	681	554	664	239	907	823	981	861	720	1847	3056	5931	1486	610	1781	3616	1475	816	999	1933	1872	982
COBS01320	0	174	100	160	304	40	195	243	272	208	219	100	509	213	463	71	486	451	320	162	152	704	287	152
COBS01321	3692	11153	4164	5169	3055	2311	7675	8863	4350	8152	7373	9144	6648	6038	5401	9829	7454	18709	8918	8568	9707	7638	12402	8865
COBS01322	4	173	53	75	17	7	15	18	0	16	32	10	5	6	20	17	29	29	19	6	6	22	21	14
COBS01323	137	472	267	245	610	124	316	233	648	302	472	419	1429	531	524	528	1358	363	584	339	575	1500	483	604
COBS01324	1	677	277	487	371	152	498	378	310	557	418	672	1132	633	659	724	1169	1344	784	680	702	1226	1000	808
COBS01325	190	173	145	416	424	44	797	680	727	585	681	64	583	607	213	47	708	163	604	78	113	572	415	92
COBS01326	6802	8624	9215	2536	5060	5042	4588	3157	8735	4682	3150	3188	7792	2625	5947	3225	7508	12154	3394	5141	5409	8879	5650	4497
COBS01327	341	98	67	82	58	30	44	53	68	84	93	170	237	186	128	95	272	550	192	161	93	267	309	198
COBS01328	249	738	274	1010	885	218	952	947	874	783	831	466	1280	709	1077	490	1479	1317	1013	539	499	1238	1133	407
COBS01329	2457	2348	778	212	2148	159	646	538	12307	595	433	1048	1037	170	1983	1058	1376	1344	245	1429	1613	2106	526	1550
COBS01330	512	378	398	315	442	139	565	565	819	802	601	316	1219	512	452	294	1114	1271	673	330	430	1288	796	396
COBS01331	196	432	414	412	579	326	620	842	675	480	360	2047	2481	611	1133	970	1810	1981	967	6020	784	3068	1404	807
COBS01333	1632	1104	824	609	1265	347	1095	922	2097	1207	1007	593	1805	682	1073	557	1841	1769	793	587	790	2286	917	806
COBS01334	3	1389	281	345	119	171	621	731	232	621	507	590	720	669	335	842	597	1577	721	722	1191	454	665	1378
COBS01335	115	355	270	276	635	119	473	546	642	563	583	271	1005	444	553	238	1051	781	507	341	402	1070	424	370
COBS01336	1584	803	636	632	1428	343	787	683	1095	932	845	397	1690	562	1315	410	1595	2212	703	691	540	1497	1067	490
COBS01337	1012	1393	621	1169	2872	549	1171	1007	4279	1355	1146	760	5316	1290	3051	552	5046	1811	2135	947	825	6842	1765	960
COBS01338	1420	1959	860	1658	1975	472	2383	2308	1286	2029	2667	1330	3058	2574	2278	1792	3586	3915	3246	1639	1697	3638	3074	2126
COBS01339	767	1443	992	944	1443	650	1389	1184	1574	1380	1213	996	2183	969	1370	890	2279	3900	1269	1271	1160	2764	1761	1060
COBS01340	2575	5352	1710	1583	2415	852	2611	2034	4985	2559	2194	1614	3611	1736	1669	1724	3676	4354	2155	1827	2310	4338	2428	1950
COBS01341	6255	4645	3846	4823	10150	2250	5762	4596	9623	5697	5742	2069	12152	3963	9960	2173	12464	12615	6723	4651	3984	13552	7405	3443
COBS01343	2	26	28	228	334	37	73	62	45	79	92	35	99	25	199	22	104	105	34	40	31	70	80	32
COBS01345	16	85	62	261	190	37	107	102	93	110	171	27	82	69	112	20	111	86	116	59	41	178	71	37
COBS01346	0	96	120	127	206	43	140	106	183	155	166	152	376	186	333	107	434	711	346	229	188	376	371	194
COBS01347	7582	7634	3429	6240	9691	2390	6180	6144	8933	6948	6844	6196	14512	6499	15173	6044	14534	16070	9382	9526	8503	15560	12155	7800
COBS01348	1210	3354	1132	1846	1820	556	2696	2479	3764	2854	2418	1839	3492	2262	1625	2502	4325	3493	2981	1737	2549	4702	3866	2139
COBS01349	828	566	179	271	351	136	315	289	352	356	367	601	1279	652	892	575	1464	1878	824	836	788	1681	1233	925
COBS01350	0	149	78	71	86	29	81	76	93	97	43	130	242	97	155	134	230	380	124	126	150	286	196	211
COBS01351	927	1045	441	300	422	196	493	488	1093	535	582	583	956	419	448	571	993	1510	484	604	683	1275	794	750
COBS01352	4184	4155	1944	1797	2298	1052	2937	2577	2573	3229	2799	2010	2824	1702	2086	1792	2859	5907	2344	1964	2034	2884	3353	1981
COBS01353	218	631	241	596	942	158	512	638	705	455	605	597	1697	1231	837	757	2374	1942	1848	771	907	2107	1256	1101
COBS01354	35797	807	92789	1282	522	31106	5202	12677	635	435	352	3820	5904	11451	2131	51	466	800	861	146	126	924	7421	84
COBS01355	123	240	99	187	260	60	331	222	450	260	205	360	1229	503	577	352	1258	872	575	463	681	1539	528	498
COBS01356	2004	1188	659	520	1213	348	823	719	2623	837	717	726	2059	717	1750	784	2122	2510	1059	1016	1308	2783	1334	1241
COBS01357	225	385	195	159	221	94	320	329	272	321	320	559	756	443	597	612	886	1472	605	554	484	1198	942	852
COBS01358	1	20	36	17	3	12	9	8	648	29	12	23	18	7	134	4	25	22	3	38	12	318	15	10
COBS01359	1210	868	705	513	450	527	642	702	260	843	541	859	1460	684	919	991	1151	5679	1000	1113	1475	1908	2430	1372
COBS01360	14107	12159	5296	6697	6023	2748	12678	11240	21644	10040	9643	3512	16183	9688	7351	3984	17004	17367	12437	4695	6342	17604	13366	5156
COBS01361	4035	6932	3264	4125	7526	1310	6429	6531	10782	6269	5890	3080	7705	3657	6126	3338	8344	9109	5058	4393	4272	8525	6042	4087
COBS01362	123	760	503	435	782	196	821	728	1156	915	645	479	1503	698	825	455	1474	2059	864	568	676	1742	1004	639
COBS01363	1163	1308	755	817	1357	368	1231	1241	2089	1168	1120	722	1846	896	1180	737	1867	2277	1153	866	894	1922	1457	1039
COBS01364	3731	1534	2754	3464	2399	1462	6006	6192	1495	7850	4402	1147	4521	4736	2513	1181	4503	12169	6421	1589	1542	4469	10413	1339
COBS01366	256	536	331	176	340	230	378	261	633	378	302	417	908	438	478	341	987	1074	486	446	518	1096	626	606
COBS01367	0	3	29	12	4	5	0	8	1	6	0	8	12	10	10	7	5	100	6	19	12	16	44	13
COBS01368	131	22	100	297	476	55	128	165	352	191	148	33	503	247	447	19	657	387	389	88	75	570	323	56
COBS01369	0	1	26	82	99	12	49	42	21	31	46	18	40	39	129	6	65	90	74	24	15	39	88	3
COBS01370	2	3	6	24	19	0	1	8	3	12	25	6	16	20	33	3	18	21	33	18	4	34	35	0
COBS01371	2	61	10	62	225	13	12	25	558	15	40	29	1636	75	1250	36	1214	70	103	57	26	1730	33	32
COBS01373	0	0	0	1	5	0	0	0	19	0	0	5	1	1	51	0	21	4	2	12	0	6	1	0
COBS01374	0	73	43	39	56	26	43	71	169	45	75	134	177	72	126	127	211	216	80	64	95	170	112	119
COBS01375	234	433	109	217	427	84	284	247	338	281	257	403	986	452	415	418	1081	686	517	401	487	1255	464	533
COBS01376	6	424	223	280	163	110	342	344	238	519	322	333	433	265	163	404	373	716	367	254	307	563	587	361
COBS01377	642	1359	302	388	317	174	711	514	452	932	508	1490	1667	1017	866	2443	1931	2183	1127	1417	2110	2166	2051	2867
COBS01378	1334	1728	1034	2457	6141	605	3887	3622	3442	3504	4034	650	5590	2416	3612	583	5733	2714	2800	1456	966	5728	2600	729
COBS01379	639	467	321	368	741	169	663	606	531	577	441	187	1084	431	571	190	1063	1191	548	317	290	1230	699	209
COBS01380	2241	1470	1824	444	576	895	626	583	441	1608	608	798	394	342	444	614	412	5716	382	718	444	401	1952	1161
COBS01381	473	872	632	1189	382	319	1224	1112	1316	1334	1646	499	1180	1484	1143	493	1462	2531	2283	749	702	1535	2086	844
COBS01382	1927	1782	1298	2389	1087	790	3776	4177	1314	3905	2536	2652	5626	4990	1987	2509	5792	10741	5649	2317	2672	6382	10096	3036
COBS01383	4076	5078	2537	5421	7759	1528	6476	6245	7566	5642	6240	3273	12905	7113	11187	3625	15432	11795	9830	6592	5686	15539	9255	5292
COBS01384	613	262	201	272	387	134	472	397	469	558	543	312	833	635	369	320	936	737	842	229	297	922	594	388
COBS01385	0	127	51	301	151	103	209	127	33	256	158	175	607	426	240	118	630	525	579	163	199	384	288	225
COBS01386	2198	3560	1329	1232	1422	728	2386	2367	3129	2133	1952	2052	3264	1502	2199	2193	3394	5734	2096	2372	3408	4061	3191	3164
COBS01387	2037	2888	1935	2760	3500	1057	3410	3025	2721	3442	3350	2235	4856	2927	3451	1980	4778	7593	3595	2340	2481	4599	3879	3050
COBS01388	1090	58	498	1856	99	327	2596	1866	100	1616	1683	64	102	452	225	43	202	1500	1224	102	39	108	1804	25
COBS01389	593	2073	1018	1416	2937	545	1844	1800	4110	1948	1654	1530	7669	2559	4682	1766	7886	4498	3308	2627	3235	10355	3630	2995
COBS01390	145	418	238	405	988	182	520	446	849	652	390	568	2782	832	1516	549	2551	1407	985	826	1067	3052	1021	943
COBS01391	1896	3504	238	350	16	159	1122	1863	47	1313	463	3343	38	1640	136	3624	29	4049	2688	1532	8734	125	5327	7005
COBS01392	1410	737	637	2349	1677	398	1422	1411	1335	1314	1614	285	2866	2849	1699	281	3210	2441	3315	591	414	2443	1760	381
COBS01393	215	152	393	642	168	305	813	683	211	1099	638	144	578	885	246	162	839	2435	2053	277	157	778	2294	229
COBS01394	0	8	3	1	2	1	1	5	0	3	17	3	6	2	1	1	4	17	1	5	0	11	3	4
COBS01395	492	2573	850	1200	419	321	2354	2037	542	1820	1515	2093	1952	2039	796	1988	1966	3751	2002	1893	2009	2200	3236	2150
COBS01396	2944	5489	3220	4688	7937	1438	7185	5855	9471	6865	6823	2550	7474	4251	5317	2485	8146	7561	6327	3206	3354	7998	5123	2969
COBS01397	167	506	238	335	529	146	497	474	537	478	366	334	842	382	460	406	813	1191	472	356	533	1083	608	578
COBS01398	1040	686	572	901	750	273	414	458	815	640	487	1642	1906	1776	1087	466	1169	2508	528	698	749	1537	1153	697
COBS01399	0	10	0	3	11	0	5	13	0	0	3	5	12	8	25	3	20	25	20	12	12	9	7	6
COBS01400	211	181	47	286	910	63	279	275	688	184	336	101	495	163	765	61	933	304	314	396	186	643	245	136
COBS01401	201	336	159	226	225	72	214	213	485	201	189	302	664	509	333	263	835	629	624	356	326	893	1164	201
COBS01402	0	28	39	3	3	27	19	4	0	37	4	22	30	16	23	21	7	177	17	13	27	41	82	21
COBS01403	448	1265	525	523	692	224	1388	1376	1730	1172	1033	758	2212	1228	833	1084	2264	1874	1617	838	1168	2984	1604	981
COBS01404	2962	4126	4221	1891	2661	2237	2377	2309	2527	2934	2027	1704	4845	2071	2717	1636	3953	20199	2884	2216	2397	4646	6053	2719
COBS01405	2195	1451	1437	1104	2846	684	1426	1740	2299	2274	1441	701	8685	1851	2786	992	6412	5808	2797	959	1184	9152	3304	1187
COBS01407	11	1	21	67	35	16	254	27	512	32	0	4	10	11	19	4	9	10	10	2	3	41	13	2
COBS01408	1458	861	758	2110	1695	502	1498	1534	1493	1483	1942	687	2686	2088	2542	691	3143	4049	2986	1321	872	2827	2576	959
COBS01409	664	2612	655	1010	225	254	1770	1720	493	2253	1204	2010	930	1161	539	2405	932	2520	1409	1445	1894	1386	3630	2528
COBS01410	0	66	56	33	76	16	101	82	251	121	70	204	372	218	236	267	477	403	197	230	360	588	240	435
COBS01411	1148	2076	832	947	1257	425	1350	1388	1269	1573	1419	1374	3047	1678	1540	1222	3194	3456	2057	1660	1504	3567	2373	1434
COBS01412	1187	2648	492	638	712	261	785	993	1884	843	769	1268	4601	1626	1696	2079	3912	2824	1570	2541	2344	6455	2130	2756
COBS01413	0	3	12	7	4	2	7	0	7	11	10	11	10	25	11	17	22	24	17	15	23	30	21	20
COBS01414	978	2697	596	861	871	313	1070	844	1256	1156	1093	1127	1660	928	749	1282	1621	2222	1106	880	1317	1972	1360	1498
COBS01415	0	72	68	104	131	66	147	145	159	128	130	162	473	285	390	165	561	709	310	215	167	679	462	166
COBS01416	257	1409	418	933	3299	208	1241	1242	3264	1058	1510	1071	8295	2158	4848	988	8011	1861	2375	2095	2056	8545	1562	1683
COBS01417	0	0	4	3	8	2	0	17	0	11	10	1	6	5	15	5	7	19	4	16	7	1	14	0
COBS01418	14	46	37	68	147	20	61	63	331	54	59	61	242	98	135	152	226	86	106	104	173	355	91	270
COBS01419	1	40	69	296	122	28	319	244	57	272	356	23	158	329	146	29	208	162	497	47	43	206	379	20
COBS01420	1	402	232	216	229	112	352	365	48	405	275	399	680	528	388	485	801	1275	573	418	600	807	705	631
COBS01421	9773	1404	6758	51	167	3200	75	98	315	2074	94	359	575	306	354	570	490	54259	370	421	443	692	11434	1826
COBS01422	0	0	0	0	13	21	10	2	71	23	10	8	22	9	192	1	19	126	15	12	24	280	58	10
COBS01423	2617	2908	4090	1794	2572	2951	2312	2241	3238	3553	2027	1960	5531	2389	3898	2224	4914	28480	3045	2864	2971	5990	9321	4067
COBS01424	0	15	4	7	6	3	6	1	0	4	1	2	8	1	8	3	2	33	3	2	3	2	6	1
COBS01425	283	123	53	956	825	59	455	447	155	328	628	90	1265	923	1312	117	1851	350	1534	468	250	1184	782	204
COBS01426	1	9	32	31	2	19	7	0	57	2	5	52	63	192	28	0	0	6	4	1	0	66	5	1
COBS01427	0	12	5	0	1	6	0	8	0	14	1	1	0	0	3	0	1	5	3	2	1	0	8	1
COBS01430	0	3	75	186	21	41	285	254	23	157	275	4	29	77	85	3	35	102	256	12	8	31	195	6
COBS01431	0	0	0	3	2	0	0	20	0	1	0	0	1	1	9	1	3	13	3	1	3	1	16	1
COBS01432	5	34	8	23	9	2	12	38	45	35	78	1	0	3	8	0	1	17	4	3	1	3	10	1
COBS01433	6349	759	4131	5582	1257	2719	9089	13299	2520	6711	6425	419	6871	5709	1235	509	6161	11816	7071	562	725	7982	13914	591
COBS01434	3167	2766	944	729	802	478	1025	1127	1752	980	981	1545	2381	977	875	1635	2343	2847	1219	1286	1923	2819	1673	2213
COBS01435	1516	3219	2027	1944	2302	1022	3361	3305	2873	3468	3305	1982	4192	2379	2130	2180	3890	6126	2740	2251	2366	4059	3274	2612
COBS01436	874	799	894	2892	1717	727	2157	2027	1546	1572	2940	537	2915	2319	2594	513	3210	5842	3776	878	647	3354	2861	910
COBS01437	1	15	0	2	5	0	14	2	1	10	5	1	1	0	9	0	0	9	5	6	1	3	3	0
COBS01438	863	940	555	275	429	197	498	496	1011	609	542	921	1694	810	759	1047	2225	2570	1112	952	1639	2428	1226	1469
COBS01439	0	314	162	347	149	69	377	286	170	1077	282	827	1684	1314	669	1330	1592	1589	1860	772	1233	1976	4978	1426
COBS01440	460	507	523	619	1201	231	825	819	1630	912	582	495	2295	829	1153	391	1980	2503	975	701	716	2054	1019	683
COBS01441	2416	2345	1043	1298	845	597	2261	1859	2011	2625	2497	1410	2869	2378	1247	1810	3188	3564	3301	1394	2193	3782	3909	3017
COBS01442	418	402	165	311	385	67	375	433	694	397	441	383	817	504	496	359	977	888	596	428	368	913	680	331
COBS01443	2133	3480	1407	2362	2300	749	3849	3703	1927	2922	2975	1823	4962	2987	2746	2222	4918	6940	4005	2524	2755	5274	4523	2344
COBS01444	0	5	0	0	0	4	0	8	0	0	15	0	0	1	1	0	0	0	3	0	0	0	0	0
COBS01445	5001	6120	4313	9166	8168	2116	13674	12145	7821	11558	16698	3889	9056	9825	6730	5672	10998	12040	13372	3970	5077	8809	12523	5039
COBS01446	1468	3444	764	905	570	474	1108	1264	742	1354	882	2323	1796	1250	768	3102	2122	3425	1416	2419	3043	2384	2645	2499
COBS01447	524	129850	354	36	329	128	63	23	1662	551	63	51188	5465	797	3959	128986	2271	1978	1932	87534	235961	8131	1266	217240
COBS01448	1	25	1	5	10	0	1	2	0	9	0	7	34	4	8	14	9	0	9	12	4	26	3	6
COBS01449	0	361	192	113	66	95	182	126	161	254	76	321	311	189	145	244	316	649	190	237	276	386	429	367
COBS01450	673	763	524	482	495	229	640	537	902	868	571	817	1199	601	687	978	1386	1757	693	786	1167	1965	1354	1514
COBS01451	1019	177	607	92	1160	399	129	71	437	422	120	28	388	143	434	36	1135	3919	272	243	75	1287	1191	129
COBS01452	25	41	138	343	205	73	780	334	193	368	620	42	410	496	289	73	910	311	814	126	143	459	560	57
COBS01453	1118	510	541	151	558	227	255	314	543	395	157	571	790	186	830	293	886	1689	202	733	428	926	609	594
COBS01454	736	53	145	622	387	79	572	438	165	269	471	50	520	427	471	58	620	375	676	135	63	607	561	63
COBS01455	0	0	4	23	4	1	0	0	0	0	8	2	16	14	29	2	20	17	33	6	2	24	20	1
COBS01456	1	5	21	125	137	26	128	126	3	84	156	38	124	92	196	10	116	98	146	35	9	96	163	12
COBS01457	0	4	4	13	5	1	0	3	1	11	3	0	1	1	3	0	0	3	2	0	1	7	0	0
COBS01458	133	453	132	808	324	122	862	549	79	566	660	216	1138	846	549	211	1005	1058	1222	210	398	1136	1254	166
COBS01459	308	2391	904	839	1296	474	1095	1090	2261	1378	980	1415	3997	2061	1899	2505	5964	3260	2749	2307	3187	4782	3812	2672
COBS01460	1271	566	264	439	282	176	567	566	1067	456	342	411	842	513	463	426	951	1083	623	578	1051	1036	871	806
COBS01461	570	502	380	161	277	212	203	207	369	285	199	526	525	208	653	378	647	2131	238	671	657	808	890	768
COBS01462	17048	9038	10605	8590	5515	4371	16875	14193	6090	27356	22183	4024	8800	8750	3931	3668	6326	24017	13183	2639	2091	6979	20516	2805
COBS01463	0	231	327	247	282	127	389	419	297	544	364	151	604	323	272	150	588	905	385	192	198	714	670	268
COBS01464	185	876	123	147	375	68	201	183	428	192	204	1793	2056	743	722	2111	2824	1454	1037	1488	2340	3301	1146	2385
COBS01465	211	532	273	438	580	198	862	657	291	928	543	638	1550	833	583	459	1750	1644	1013	668	544	1611	1091	573
COBS01466	148	467	201	514	389	111	920	658	853	1217	1238	518	2340	1747	989	664	2469	1020	2348	570	807	2932	2479	998
COBS01467	467	123	122	119	45	60	83	218	136	131	102	479	133	74	81	197	139	594	123	1309	75	162	388	61
COBS01468	1	23	26	7	6	4	5	3	0	22	3	6	14	7	15	4	12	43	14	12	9	11	31	6
COBS01469	519	542	306	303	356	125	389	489	1408	649	334	310	741	335	332	266	626	608	599	422	340	905	701	228
COBS01470	6	484	388	304	339	129	402	343	257	537	283	481	1058	592	530	374	1115	2075	795	531	561	1269	1081	709
COBS01471	335	107	234	272	122	58	709	698	127	1622	676	339	629	831	245	401	568	635	878	274	364	890	2546	523
COBS01472	0	17	120	20	25	47	49	59	58	79	33	41	22	24	38	6	56	239	25	79	2	9	116	14
COBS01474	228	287	488	1361	882	316	1040	945	1132	1285	1092	505	3380	2774	2180	335	2722	2701	3657	627	340	4107	4946	371
COBS01475	3	3	52	67	7	9	176	145	21	149	163	5	75	183	32	4	81	111	288	8	3	49	303	3
COBS01476	9	51	722	164	1138	421	301	182	28611	242	255	76	7372	197	5149	25	12442	607	219	138	32	24309	501	35
COBS01477	291	539	464	241	354	219	600	551	311	596	311	445	1226	594	623	382	1277	2919	663	502	546	1478	1359	556
COBS01478	621	697	473	386	496	264	668	691	1119	1265	545	947	2056	762	808	812	1961	2625	864	964	1370	2228	1989	1788
COBS01479	0	236	651	550	4264	332	465	271	1104	775	315	247	15719	1527	2525	221	7196	3141	2466	449	312	13330	1656	335
COBS01480	12814	2876	4705	7184	5289	3066	9328	9058	4562	10234	7291	2369	8583	6717	3002	807	8433	13428	7373	1933	2386	9438	10985	1125
COBS01481	0	85	75	111	94	34	204	158	235	209	232	67	115	87	59	97	117	181	104	50	52	125	147	65
COBS01482	645	1896	800	385	531	305	1008	969	1279	979	662	1659	1865	973	729	1361	1703	4244	985	1237	2298	2080	1518	1760
COBS01483	0	9	0	3	16	0	0	5	0	2	13	5	26	11	30	15	26	23	18	10	12	54	36	12
COBS01484	1746	2635	1416	1445	3005	690	2503	2177	4602	2371	2415	1262	3518	1578	2098	1241	3891	3296	2064	1520	1748	4258	1885	1357
COBS01485	6375	2555	3222	7039	10921	2011	6613	5914	9226	7173	7021	1196	13552	5722	11529	1342	14321	12336	8913	3026	2288	15176	8584	2145
COBS01487	231	177869	381	605	120	205	1133	882	835	1903	390	125520	404	1736	1052	173065	623	5338	1688	229238	457627	1084	4979	328964
COBS01488	0	4	9	56	113	11	34	5	29	35	28	3	27	7	191	2	48	56	30	17	8	54	59	4
COBS01489	0	4	10	20	66	2	8	26	66	33	19	8	53	25	181	6	72	73	59	20	11	74	43	11
COBS01490	0	8	0	5	22	21	16	19	0	0	6	1	48	19	113	5	68	115	24	13	11	60	44	17
COBS01491	0	3	11	36	90	13	15	48	0	52	39	12	158	78	300	18	180	237	127	42	31	153	171	34
COBS01492	0	1	13	13	68	3	8	12	0	22	13	11	90	58	153	9	99	116	96	26	7	67	80	15
COBS01493	834	1362	567	472	625	279	1057	873	1769	1077	964	333	684	366	298	342	678	958	451	400	460	771	538	340
COBS01494	574	1184	348	437	26	241	707	1006	1	850	414	715	118	679	76	924	91	2104	597	569	1255	249	2017	438
COBS01495	0	1311	10	4	7	1	20	14	0	6	22	1637	7	0	7	1967	5	23	8	546	1443	1	3	551
COBS01499	1	6	6	27	12	28	27	53	0	29	42	6	18	12	6	6	12	37	34	10	11	28	53	0
COBS01500	193	121	165	232	156	106	447	313	189	408	400	135	322	267	79	62	326	555	512	114	210	379	707	65
COBS01501	712	589148	2272	7992	89	1313	3351	1427	1675	1079	688	419981	722	3547	2341	525310	848	11457	5431	243456	522056	1611	6306	303646
COBS01503	706	2192	1216	2412	408	706	2420	3975	574	1093	1021	1220	6554	2811	547	1698	8162	10109	3011	876	1038	7301	4355	1826
COBS01504	1	132099	6	21	3	18	56	44	78	5	26	185472	10	33	25	110812	14	124	31	60834	188833	23	70	91202
COBS01507	948	134	215	424	1329	81	611	324	661	627	687	73	365	174	306	60	441	150	379	95	77	310	161	62
COBS01508	2742	927	816	2511	3854	664	2012	2061	1502	2081	2024	512	2779	1607	2510	533	3284	1991	2616	970	759	2932	2613	551
COBS01509	0	33	14	163	85	26	50	23	0	39	29	44	114	273	94	18	80	56	75	37	27	69	90	12
COBS01511	534	80	13	8	21	12	27	10	71	39	30	87	13	9	11	35	12	33	5	35	20	27	15	14
COBS01512	1	13	37	142	195	18	91	64	17	36	79	24	158	93	294	37	170	163	205	95	45	114	173	45
COBS01513	0	1	1	3	11	0	0	0	0	7	0	3	1	6	4	0	1	2	2	15	4	3	4	2
COBS01514	0	1	13	0	3	11	0	39	0	0	0	0	0	1	2	1	1	1	0	5	0	0	3	0
COBS01517	0	1	5	44	79	12	41	54	0	43	32	14	59	25	66	11	51	53	58	23	21	36	37	18
COBS01518	0	0	2	0	0	11	0	4	0	0	0	0	2	2	7	0	0	0	1	4	0	0	2	0
COBS01520	0	8	1	14	3	0	2	1	0	3	2	11	1	2	41	3	13	11	2	18	5	8	12	8
COBS01522	0	115	53	83	76	22	131	126	96	190	79	155	224	120	92	155	217	157	118	103	150	262	217	124
COBS01523	595	677	645	504	440	232	889	749	762	1083	682	320	861	528	362	282	748	1309	695	264	352	911	938	398
COBS01524	2	111	12	323	3273	9	7	4	432	2	45	188	12844	1369	1347	127	8890	63	1800	137	107	10227	56	166
COBS01525	84	79	181	28	4	178	9	10	59	22	1	119	47	81	61	175	54	741	75	214	243	89	189	251
COBS01527	3151	2051	1484	2077	3451	887	2191	2179	3655	2386	2003	1017	2607	1239	2905	960	2731	3962	1645	1300	1391	3002	2396	1410
COBS01528	0	25	12	48	72	8	35	25	0	13	12	121	325	144	367	115	415	407	225	166	193	535	283	236
COBS01529	692	511	378	203	457	171	265	207	662	380	155	458	1327	284	738	384	1379	2281	336	614	629	1801	746	644
COBS01530	0	7	13	30	50	11	32	62	0	13	34	0	86	66	36	6	98	19	76	12	11	49	48	9
COBS01531	0	2	9	5	40	4	1	24	18	7	31	7	34	8	34	0	18	20	10	9	5	29	11	7
COBS01532	141	353	334	1946	1605	221	2124	2116	1041	1420	3169	1493	3072	5860	1563	256	3414	558	5246	443	457	1927	1479	350
COBS01533	0	195	35	15	326	33	24	10	628	72	16	272	754	14	934	310	667	352	46	485	647	1328	103	572
COBS01534	34	82	31	0	8	2	11	8	15	11	1	22	5	1	18	27	2	25	3	23	23	14	14	15
COBS01535	606	125	98	28	57	61	19	62	45	67	33	170	105	43	218	117	77	347	57	181	214	196	1612	154
COBS01536	840	800	438	260	622	228	407	417	1025	631	439	1029	1754	742	1024	970	1846	2409	731	1269	1422	2148	1149	1350
COBS01537	433	1312	671	1262	752	345	2209	1857	646	2267	1344	538	1419	1694	632	651	1473	3074	2458	1321	3259	1413	3599	1964
COBS01538	384	778	480	366	635	200	923	832	1966	923	857	404	945	442	365	381	979	975	528	346	434	1135	711	424
COBS01539	1	111	64	61	100	37	75	49	82	129	61	129	190	77	148	100	237	214	91	110	130	289	120	178
COBS01540	1622	4039	1222	1131	1270	647	1941	1262	2147	1782	1546	2033	2134	905	1588	1931	1790	4314	1319	1606	2301	2588	2238	1497
COBS01541	9958	13812	3872	8095	8951	1990	12141	10292	13256	10945	13303	7633	15490	9566	8571	10591	17182	10797	12990	7102	10049	15377	13102	11918
COBS01542	0	90	0	11	22	6	43	11	0	70	69	19	9	13	10	20	17	15	28	11	31	15	23	12
COBS01543	8609	16722	5317	8284	1353	3197	16056	14476	2403	44552	13530	6553	3643	7492	2279	17528	3528	15841	9539	7977	16634	3840	56932	19951
COBS01544	219	772	417	366	227	157	742	696	310	795	698	459	472	445	406	246	646	826	549	656	355	571	777	287
COBS01545	243	1151	9644	1568	1631	7664	3496	1724	1783	1324	1788	724	5255	4921	1774	941	7806	1142	5588	1337	1546	4528	2166	1283
COBS01546	0	5	18	80	32	21	107	135	1	112	92	19	72	126	47	24	89	81	169	32	42	58	225	38
COBS01547	154	494	126	227	140	28	327	440	152	306	268	53	137	291	90	35	119	39	383	40	40	94	60	43
COBS01548	49	4135	175	112	16	103	189	173	60	104	34	1460	24	30	15	2160	21	308	48	549	639	63	172	294
COBS01550	2262	3560	2006	1249	2277	956	1998	2150	3469	2625	1990	1355	3111	1297	1707	1327	3357	5285	1588	1628	1678	3623	2362	1827
COBS01551	0	14	5	16	2	0	1	4	0	11	7	1	4	2	11	0	4	21	1	7	1	11	6	0
COBS01553	158	143	93	889	1412	93	867	744	191	508	800	96	1149	942	1069	82	1851	534	1639	206	85	1087	876	101
COBS01555	1	95	2	13	21	1	9	4	5	5	4	25	1	1	4	18	1	1	0	21	29	12	0	31
COBS01556	310	921	537	695	1239	256	1220	1235	927	1148	1172	787	3031	1268	1757	693	3028	2583	1537	1168	1153	3209	1433	1162
COBS01557	151	12	6	0	16	12	14	17	0	18	5	2	17	12	23	0	32	14	17	4	8	35	26	5
COBS01558	0	0	15	36	32	5	21	34	0	22	24	8	39	25	39	6	43	31	45	9	4	32	40	11
COBS01559	2	2	22	8	19	8	17	26	0	13	18	6	25	33	31	4	48	18	53	18	8	34	27	7
COBS01560	2	4	6	21	11	8	6	36	0	18	0	2	11	3	12	1	14	16	5	4	1	11	14	1
COBS01561	0	1	1	8	8	2	14	0	0	6	5	0	4	5	3	1	9	11	2	3	1	3	7	0
COBS01562	0	0	634	17	5	264	189	14	0	19	54	0	4	2	8	1	13	16	6	0	0	17	20	1
COBS01563	0	3	2	10	12	5	24	30	67	27	20	1	12	8	6	0	19	20	6	3	1	8	14	1
COBS01564	0	0	0	14	14	0	33	15	0	4	9	1	3	2	8	0	4	15	9	2	1	12	7	1
COBS01565	8	20	18	92	34	15	27	43	18	20	13	5	44	39	32	2	32	44	14	7	2	34	23	1
COBS01566	0	0	17	5	15	4	28	9	0	0	10	0	21	6	16	1	31	14	12	1	2	32	26	0
COBS01567	2	20	1	22	16	15	17	20	27	10	26	0	14	9	24	1	29	18	15	0	1	21	22	3
COBS01568	168	0	38	17	16	11	16	34	0	7	0	3	10	14	15	2	22	25	10	0	1	22	11	2
COBS01569	0	1	21	16	22	1	8	14	0	29	13	5	19	15	19	0	37	26	17	5	0	21	29	4
COBS01570	0	8	12	39	17	2	50	31	0	40	25	1	20	12	29	2	34	28	32	3	1	32	44	0
COBS01571	3	0	2	22	20	0	20	27	50	24	5	0	11	7	23	0	12	17	17	1	0	8	14	0
COBS01572	0	6	5	9	12	10	24	9	4	4	9	0	14	11	21	1	23	12	12	10	0	11	10	1
COBS01573	0	2	18	23	20	11	19	61	0	5	24	1	8	3	15	2	28	11	8	1	1	21	11	0
COBS01574	1	4	5	10	31	4	33	24	0	11	29	3	11	0	14	1	11	22	12	2	2	14	18	0
COBS01575	0	0	10	24	14	5	24	21	4	5	7	0	5	12	22	0	16	21	4	0	1	11	14	1
COBS01576	1	0	14	8	10	11	46	15	1	24	49	0	6	1	13	0	17	18	5	1	0	13	12	0
COBS01577	0	3	9	34	27	4	21	25	39	25	22	2	16	6	36	1	23	39	18	0	1	11	27	0
COBS01578	0	1	0	34	20	3	60	38	0	35	12	0	12	5	27	0	24	36	15	0	1	16	24	1
COBS01579	1	20	10	13	5	33	29	28	0	5	8	3	6	8	21	0	39	57	28	1	1	21	228	0
COBS01580	1400	34	2271	30	17	2057	122	209	1	21	21	12	8	6	30	0	31	32	76	5	4	31	1017	2
COBS01581	1	31	2	15	3	1	14	21	0	18	0	18	1	4	18	1	18	15	6	7	11	12	15	0
COBS01582	1	57	0	12	8	0	48	10	0	10	15	38	15	2	18	8	17	29	10	12	19	9	20	2
COBS01583	0	146	3	20	16	7	26	12	0	19	15	117	6	5	14	28	13	20	9	25	39	6	15	4
COBS01584	0	5	5	1	19	0	18	23	0	11	21	0	11	3	28	1	18	20	12	0	1	3	17	0
COBS01585	0	0	7	28	8	2	18	1	1	20	13	0	2	3	5	0	14	9	4	0	0	5	8	0
COBS01586	8	5	45	53	11	12	35	22	1	17	3	80	59	128	34	0	18	15	11	0	0	10	13	0
COBS01588	1	6	5	7	7	11	24	21	0	21	10	6	12	4	24	0	25	7	15	4	0	6	162	2
COBS01590	1	0	6	28	5	1	33	2	0	8	0	0	1	1	2	0	1	2	6	1	1	4	8	0
COBS01592	23	22	32	45	6	17	109	61	0	46	24	80	14	17	10	35	14	74	26	303	6	4	73	10
COBS01593	2	379	196	305	23	110	320	498	41	326	193	249	96	277	96	148	104	762	325	209	309	149	547	207
COBS01595	1265	1816	646	3102	71	454	3359	3531	350	3037	3062	1389	141	1726	523	3223	175	1889	2676	1500	2079	267	5221	2582
COBS01596	6	1602	77	71	148	15	465	199	1	420	206	45	25	86	69	60	28	239	150	79	79	40	271	55
COBS01597	1323	1852	640	1107	686	393	1579	1196	713	1347	896	703	921	1457	640	711	966	2255	1477	543	818	1046	1243	539
COBS01598	0	35	19	41	45	18	23	21	1	31	27	37	42	80	52	35	65	152	144	131	50	37	120	24
COBS01600	2	115	91	373	587	55	252	213	201	183	307	100	604	354	538	60	787	347	525	194	90	589	347	96
COBS01601	0	1	1	10	37	2	5	8	0	3	0	9	21	12	35	0	23	5	29	6	0	15	9	1
COBS01602	0	0	5	52	58	7	24	23	0	14	7	4	21	18	57	4	38	10	57	15	3	26	28	0
COBS01604	0	0	9	25	137	0	83	32	0	52	70	5	12	13	39	0	18	13	12	14	0	2	28	1
COBS01605	4	14	5	2	14	10	29	10	5	8	3	1	1	3	5	0	5	5	12	1	0	2	3	0
COBS01606	0	0	10	96	102	9	17	27	20	26	69	5	14	13	84	3	28	21	25	20	3	18	40	0
COBS01607	0	8	188	45	61	25	29	26	0	7	31	8	8	11	55	0	19	16	32	15	1	13	19	2
COBS01608	0	7	19	68	167	3	62	49	17	78	125	5	9	9	61	2	21	17	18	17	0	13	29	1
COBS01609	0	21	0	5	8	10	8	1	1	6	1	0	3	1	7	0	0	2	1	1	0	0	3	0
COBS01613	8	62	10	14	20	4	37	45	19	9	24	0	2	6	31	2	21	7	5	2	1	21	4	0
COBS01614	0	22	6	31	23	1	24	31	72	14	15	2	22	37	58	3	19	10	16	5	5	115	21	4
COBS01616	156	11	183	383	180	82	630	599	130	1025	1211	636	1415	1812	157	289	758	11	2029	2058	1	377	1071	17
COBS01617	0	148	137	95	225	30	229	182	276	265	119	383	820	404	436	444	996	1043	503	404	622	1494	840	553
COBS01618	810	2464	1309	1355	1718	764	1511	1396	2550	2021	1431	1983	4105	1955	3041	1549	4485	7484	2646	2893	2844	4939	3866	2598
COBS01619	1787	869	1186	2349	735	549	3838	3618	1513	3797	3454	325	745	979	564	289	758	2450	1669	548	342	591	2523	241
COBS01621	0	5	0	16	7	11	2	5	83	4	20	1	0	1	4	0	7	1	0	0	1	1	5	0
COBS01623	0	18	6	10	7	1	4	6	2	6	8	1	1	0	1	0	7	5	0	0	0	0	1	0
COBS01624	0	3	0	3	25	2	24	0	0	6	6	7	17	11	69	5	35	15	17	24	20	25	13	12
COBS01625	36	383	125	592	1294	124	358	478	1410	362	560	187	1212	327	2278	253	1362	314	517	915	820	1225	495	682
COBS01627	2	1	6	6	21	2	10	0	48	4	20	6	10	1	15	1	15	2	2	28	3	5	21	4
COBS01628	9	1326	676	341	538	296	946	855	1177	981	851	659	1403	783	626	643	1288	2926	942	718	839	1438	1165	746
COBS01629	384	2601	627	686	895	194	1020	928	2307	1010	1011	830	2009	851	673	1166	1782	1743	1060	652	1248	2498	1265	1391
COBS01630	9	137	67	73	90	18	131	194	0	195	115	116	290	199	110	172	281	294	245	104	164	307	409	201
COBS01631	0	14	26	27	33	19	41	38	104	33	35	17	52	24	32	15	57	42	57	22	20	48	38	22
COBS01632	0	28	12	51	73	13	25	48	78	73	47	10	45	19	38	13	53	48	46	19	21	40	39	19
COBS01633	0	3	0	2	15	0	14	3	1	4	10	6	1	1	3	0	1	0	3	3	2	1	2	4
COBS01634	0	7	40	10	19	6	22	12	149	20	1	21	34	9	154	5	22	162	26	29	16	374	58	24
COBS01635	1219	1160	1243	890	1850	608	1639	1289	2219	1614	1304	660	3084	1116	1997	624	3010	4741	1507	1108	1119	3800	1994	1115
COBS01636	1	226	65	105	100	73	149	103	257	75	60	162	325	74	184	256	445	232	426	471	532	380	936	381
COBS01637	5453	4459	4115	3888	7707	2105	6510	5431	6588	5793	5918	2543	7976	3999	6782	2289	8281	13830	5760	4254	3531	7644	6940	3383
COBS01638	0	26	15	87	72	32	34	51	0	38	20	41	119	40	191	47	160	181	130	95	79	170	146	71
COBS01639	794	1862	989	885	1172	481	996	1098	1822	1290	1040	543	1635	684	916	609	1631	2383	933	792	811	1842	1304	817
COBS01640	5	236	122	107	213	37	149	157	315	150	180	271	495	170	344	276	471	590	215	228	339	606	294	350
COBS01641	1	817	532	408	589	231	525	591	614	561	466	692	1206	605	810	530	1380	2769	734	890	824	1473	1006	837
COBS01643	0	116	61	22	61	49	34	60	115	103	50	231	279	135	144	177	293	383	145	157	200	459	212	232
COBS01644	536	1005	628	350	665	308	737	554	649	877	612	487	935	371	751	421	1015	1932	616	524	615	1155	1009	630
COBS01645	0	33	15	5	25	14	62	14	0	46	42	0	9	6	5	1	9	13	13	4	2	7	9	3
COBS01646	1066	443	364	2765	1595	440	1475	1515	938	1366	1990	382	1914	1703	1977	414	2253	2164	2973	710	703	2108	2181	707
COBS01647	235	307	346	1003	795	217	1082	858	495	855	1445	383	1827	1456	1123	340	1863	1767	2389	512	560	1566	1459	539
COBS01648	137	307	287	835	225	261	896	977	279	1871	500	2158	1818	2011	597	2532	1751	1997	2916	865	1650	2218	7188	1748
COBS01649	0	148	59	61	177	32	154	198	143	220	153	124	640	314	297	173	778	679	396	220	248	688	361	205
COBS01650	0	2447	503	78	48	671	328	346	0	279	169	2098	107	811	176	3187	142	596	474	1269	3455	166	1138	1975
COBS01652	1	53	22	40	88	16	67	39	39	42	49	60	60	21	224	22	71	118	34	137	40	158	68	38
COBS01653	0	5	42	104	29	18	139	128	0	101	88	5	19	49	29	3	28	82	89	4	4	14	121	2
COBS01654	830	74	431	1374	664	322	2281	1902	315	2152	2204	34	447	985	369	29	772	1245	1648	85	65	429	2210	39
COBS01655	0	6	26	11	29	9	42	57	33	31	61	6	18	7	11	4	29	23	19	7	9	23	9	10
COBS01656	0	51	38	49	78	5	52	54	174	55	68	17	91	61	58	27	101	62	74	34	41	115	45	22
COBS01657	0	2	14	8	22	15	12	1	1	32	7	36	36	12	50	17	68	25	10	47	23	40	22	9
COBS01658	291	699	316	467	514	167	634	510	686	607	471	390	1276	651	702	559	1341	1446	773	426	600	1707	1023	690
COBS01659	0	359	213	135	820	89	200	125	2507	444	268	256	2466	363	2435	195	2870	1659	534	506	408	3974	697	399
COBS01660	494	1417	634	945	1130	324	1579	1410	1356	1494	1582	1202	3854	2699	1444	1276	4235	3936	3287	1537	1467	4526	2867	1442
COBS01661	0	34	36	432	301	28	327	253	167	200	526	47	599	1122	480	23	961	300	1764	126	66	512	588	47
COBS01662	2	9	11	12	7	0	2	17	0	11	18	26	18	11	7	12	10	35	14	41	21	14	38	14
COBS01663	0	25	42	145	66	38	240	253	0	271	247	39	267	409	123	27	347	466	515	45	55	224	492	30
COBS01664	3429	687	1665	3649	1614	1072	5796	5646	1885	5086	6008	322	2960	4445	1237	299	3476	4913	5940	555	496	2642	5884	297
COBS01665	0	1	11	9	3	1	21	10	54	25	4	5	11	23	70	11	10	67	16	10	18	103	67	11
COBS01666	2	116	58	489	934	33	323	317	571	360	476	62	1317	788	873	73	1286	182	783	122	145	1296	305	108
COBS01667	1	0	1	0	13	3	7	0	0	1	6	3	0	2	3	2	1	6	4	9	3	0	2	3
COBS01668	0	5	2	45	73	0	12	12	4	2	6	4	214	243	106	4	127	16	194	8	7	118	25	0
COBS01669	1	64	16	65	842	11	32	29	3005	94	36	33	5553	129	4061	54	4163	53	215	107	141	6921	223	154
COBS01671	0	56	162	466	476	101	314	335	523	765	551	27	1229	870	259	20	1053	350	1452	55	11	672	443	18
COBS01672	1551	916	2135	1588	792	1792	3295	3041	1998	4651	4936	404	1793	2182	846	317	2197	1967	4014	685	402	1906	4008	365
COBS01673	0	79	2	108	377	5	81	100	88	55	188	17	185	73	137	14	267	30	106	38	17	172	43	23
COBS01674	198	372	272	1112	2979	211	933	852	914	629	1125	156	2410	1022	2179	150	3227	373	1698	557	387	2379	886	247
COBS01675	0	0	4	36	131	9	41	19	0	11	68	4	27	16	32	1	32	13	29	7	4	16	24	2
COBS01676	0	2	6	1	26	3	11	6	0	4	22	3	6	5	20	2	13	17	6	8	3	14	21	6
COBS01678	0	2	0	0	13	0	0	19	0	0	0	3	20	0	26	4	13	3	0	6	2	14	3	7
COBS01679	85	192	98	41	446	45	83	101	1949	151	121	115	551	44	658	131	494	161	104	236	222	736	129	182
COBS01680	1	4	1	61	6	15	7	14	14	9	21	1	3	3	8	2	3	3	9	6	2	7	8	6
COBS01681	1	207	132	515	1551	59	911	746	3899	644	1134	124	3808	1590	1018	168	4998	175	1851	309	370	4015	757	275
COBS01682	1	107	179	171	104	60	429	239	203	443	387	91	300	169	141	117	299	306	214	83	77	460	333	91
COBS01683	12223	40654	5674	4632	4118	3013	6789	5570	28524	7440	5573	18050	18967	8000	6239	20718	22272	17166	9263	21087	24701	27968	12793	24427
COBS01684	0	0	5	18	1	6	7	3	1	10	20	1	0	0	4	0	0	12	8	1	1	0	12	0
COBS01685	8	0	27	5	4	74	19	11	0	13	1	0	2	3	5	0	6	26	11	1	0	2	43	1
COBS01688	0	4	0	17	26	0	0	2	0	9	16	0	8	11	14	1	16	4	20	2	2	9	5	1
COBS01689	0	0	6	3	2	3	1	21	0	1	8	0	6	2	0	0	4	12	0	1	0	1	11	0
COBS01691	156	1	16	6	6	8	2	5	0	11	2	1	5	6	3	0	1	10	0	1	0	0	12	0
COBS01692	232	133	98	585	1311	36	554	474	765	427	888	21	624	442	454	30	877	119	612	85	78	627	330	35
COBS01693	0	0	0	12	2	0	3	5	0	8	0	0	0	2	0	0	0	7	12	0	1	0	6	0
COBS01694	1	0	69	31	5	46	96	30	0	17	29	3	6	19	3	1	5	65	31	1	2	2	52	0
COBS01695	0	0	27	3	1	15	17	18	16	17	7	2	6	6	14	5	7	98	22	1	4	7	50	3
COBS01696	0	0	4	18	20	30	10	17	1	10	25	1	17	12	21	0	18	38	19	4	3	18	19	3
COBS01697	454	741	374	531	751	153	894	824	1062	838	867	526	1621	839	965	522	1788	1814	1091	634	685	1818	1085	717
COBS01698	4000	1897	1952	8010	7881	2175	5771	5766	4073	5285	6356	926	4802	3134	6178	1015	5279	5027	4961	1776	1026	3981	5675	1072
COBS01699	1	17	26	91	135	11	27	51	41	40	39	20	90	40	220	14	106	102	82	33	22	102	143	14
COBS01700	0	4	9	35	68	12	37	28	1	17	23	10	31	15	57	10	37	29	19	10	10	26	36	9
COBS01701	2	0	0	25	20	0	9	13	0	27	4	4	18	9	53	1	13	20	10	3	1	21	20	6
COBS01702	1601	1212	6134	253	958	5201	828	877	1724	767	297	989	561	236	1073	692	762	3948	854	1615	1162	907	9640	1162
COBS01703	1154	1286	742	477	710	438	763	830	716	1118	731	631	1354	612	738	639	1363	3613	707	683	823	1566	1437	921
COBS01704	355	361	166	205	691	83	241	194	850	316	243	455	3516	751	1576	566	3336	1293	940	693	938	5253	971	829
COBS01705	1	55	25	50	120	25	67	74	158	47	26	223	1033	353	385	246	1208	755	318	297	422	1640	421	407
COBS01706	248	113	58	64	131	32	165	209	302	133	144	151	506	225	180	184	542	462	242	183	251	519	208	246
COBS01707	340	487	391	517	1100	295	820	718	1008	746	800	274	1197	604	703	216	1564	1320	751	528	494	1773	712	383
COBS01708	81	342	250	182	225	146	302	237	494	392	218	275	734	386	455	235	864	1404	498	357	322	1004	867	481
COBS01709	834	638	382	224	471	148	309	376	1045	460	277	1175	1292	446	1101	1092	1334	2602	663	1242	1660	1711	1195	1861
COBS01710	1	33	56	477	874	9	128	74	1177	247	307	29	1594	953	290	28	2471	153	1175	50	40	1648	177	16
COBS01711	1	5	3	28	8	19	0	0	190	13	0	0	2	3	52	0	6	2	3	0	0	160	4	2
COBS01712	1951	2414	1608	1227	1612	662	2072	1755	2937	2605	1682	971	2712	1254	1536	975	2667	4086	1597	1192	1323	2747	2154	1439
COBS01713	0	0	90	0	2	23	0	5	0	10	0	2	1	3	0	0	0	0	2	0	1	0	2	1
COBS01714	0	281	98	331	454	68	440	324	392	503	398	347	1195	675	656	337	1205	618	787	353	459	1457	781	447
COBS01715	681	223	131	106	258	73	260	253	310	334	156	136	413	187	187	132	435	454	191	132	203	546	270	208
COBS01716	0	19	24	165	233	11	201	17	89	173	288	24	736	669	148	17	950	24	908	13	5	847	207	9
COBS01718	773	169	1429	7211	10999	1919	8190	2372	6838	7850	14878	251	18158	18142	3606	110	34076	693	29292	202	100	14774	8407	82
COBS01719	431	1268	1291	684	1075	516	1030	886	1274	1372	869	900	1414	758	962	640	1509	4110	1069	1030	801	1680	1628	1031
COBS01720	4051	105138	5781	6854	186	3514	20186	26139	930	15978	15197	119114	2327	22383	588	157481	3968	40053	16687	61601	140574	2578	42811	31358
COBS01721	193	220	150	83	343	98	127	130	987	150	71	189	1078	185	965	154	772	731	109	286	438	1661	235	381
COBS01722	519	910	691	690	1593	361	1344	1091	1862	1178	1270	602	2154	988	1093	640	2172	2215	1088	713	829	2501	1083	886
COBS01723	264	1459	205	172	268	117	357	549	376	320	316	1226	1203	568	579	2134	1179	1610	553	1079	2103	1822	1192	2327
COBS01724	7364	4013	3983	545	1204	1921	809	969	2364	2598	882	1565	3188	805	1449	1460	2913	14388	906	1732	1777	4330	4647	2285
COBS01725	0	1	2	31	8	10	8	4	3	2	0	13	9	3	4	8	11	9	2	15	6	15	4	6
COBS01726	1218	2073	1897	3859	12798	1441	3307	3486	3898	2803	3601	1226	35340	5331	21729	2362	34336	16325	8186	3581	3766	32495	7600	4045
COBS01728	105	0	1	12	34	1	3	1	0	7	0	5	14	17	13	0	21	11	14	4	0	10	12	0
COBS01729	13	18	5	309	1064	56	34	20	46	68	72	32	322	134	798	61	453	91	207	203	108	275	84	98
COBS01730	0	12	41	110	1039	35	80	39	264	120	160	8	143	52	350	20	178	43	146	27	21	119	30	23
COBS01731	0	43	2	4	65	3	44	23	29	6	19	0	13	1	6	3	8	16	7	2	1	13	16	3
COBS01732	0	1	0	12	3	4	1	7	3	5	0	0	0	3	6	0	2	12	3	3	1	0	0	0
COBS01733	0	0	12	10	1	8	11	2	0	0	5	1	1	0	1	0	1	13	1	3	0	1	5	0
COBS01734	253	969	444	278	392	192	387	382	637	549	278	683	1149	446	592	617	1005	2225	538	744	804	1024	795	964
COBS01735	494	436	298	402	371	165	694	694	343	664	645	366	1180	789	582	371	1294	1712	1021	560	673	1355	1273	573
COBS01736	0	204	106	42	101	19	119	115	233	155	102	98	229	99	159	109	201	169	109	98	136	289	172	190
COBS01737	1736	5946	1926	2072	3109	976	3024	3166	5230	3315	2627	2760	5525	2539	4787	2839	5796	5794	3713	3391	4249	6174	4619	3901
COBS01738	213	160	77	119	140	54	128	197	396	138	131	226	464	252	255	210	564	391	331	283	259	636	346	237
COBS01739	848	494	565	2609	3294	159	3708	3129	3931	2141	4100	112	2178	2562	1301	151	3233	816	3340	191	222	1823	1248	140
COBS01740	775	757	603	260	491	248	496	445	1515	505	337	354	579	239	360	322	591	1256	272	313	343	717	455	405
COBS01741	0	0	11	3	3	23	0	0	0	6	0	1	21	5	12	1	20	32	10	5	9	22	3	10
COBS01742	252	242	145	287	485	83	274	183	456	321	393	201	1513	767	1112	225	1830	1103	1051	378	411	1842	912	354
COBS01743	97	9	29	30	44	11	19	32	60	20	6	54	101	24	55	37	103	114	35	40	45	119	53	51
COBS01744	500	275	96	153	219	53	211	260	417	224	149	264	481	206	223	277	472	514	281	230	247	669	327	337
COBS01745	844	765	390	986	2082	270	1160	1062	3034	1417	1372	232	3829	935	1545	252	3374	953	1367	455	506	3678	1125	463
COBS01746	252	41	81	104	277	51	50	53	6343	73	25	12	14903	409	1473	29	12295	118	49	24	15	27778	171	30
COBS01747	1982	572	1096	104	585	643	98	50	1404	568	85	93	2126	110	1066	84	1251	5417	197	206	233	2537	1875	439
COBS01749	20	36	28	98	4	11	9	9	32	13	0	14	84	446	33	0	3	31	4	2	3	6	13	2
COBS01750	0	9	3	5	5	3	6	18	0	31	4	10	49	11	20	8	6	69	37	25	21	43	59	8
COBS01751	0	0	4	0	0	5	7	14	0	11	0	0	7	3	7	0	17	16	8	2	0	4	14	1
COBS01752	0	123	58	174	910	29	302	266	480	250	126	110	1692	907	217	72	1279	426	1662	58	34	2550	777	23
COBS01753	5465	5776	6617	2032	3847	2816	3829	3368	9648	3859	3038	2670	3998	1496	3348	2009	4501	6646	1954	3206	3051	5241	5229	3133
COBS01754	935	1673	865	1469	2051	423	2024	1772	3208	2134	2304	1014	3386	2255	2109	831	3553	2832	2439	1402	1485	3456	2313	1468
COBS01755	114	685	796	456	706	271	788	859	625	748	780	439	1301	845	661	655	1303	2046	1003	613	724	1516	1314	597
COBS01756	1421	902	1050	390	886	389	765	695	1613	1044	651	364	1243	456	794	385	1438	2566	676	667	663	1635	1059	630
COBS01757	754	864	854	1047	2186	479	1558	1721	2044	1730	1802	468	2788	1146	1786	506	2978	2828	1358	765	746	3178	1546	770
COBS01758	790	703	610	951	1544	353	1205	1301	1848	1293	1312	550	3592	1559	2373	634	3926	3458	1902	1036	1009	4084	2333	951
COBS01759	1540	2070	1288	2365	2060	840	3183	2888	1411	3223	2795	1360	3654	2330	3045	1361	3979	7589	3852	2308	2400	3988	5752	2258
COBS01760	0	0	10	7	5	55	18	16	0	551	7	2	1	12	10	9	11	172	38	0	6	8	3101	9
COBS01761	1022	300	576	3119	3226	541	2810	3142	1550	2034	4310	179	3202	3787	2875	157	4851	1407	5624	483	387	2851	2647	250
COBS01762	992	1227	640	750	1648	320	1400	1143	1507	1158	1803	246	930	643	642	246	1326	1461	920	534	422	979	803	319
COBS01763	0	14	22	18	21	17	32	25	1	20	22	20	54	38	34	15	60	88	33	28	31	63	51	22
COBS01764	252	535	342	277	499	141	545	527	466	640	369	398	1327	636	543	360	1268	1746	734	558	539	1756	850	502
COBS01765	191	603	176	390	533	105	512	437	681	453	413	411	1893	662	825	323	1828	1289	856	701	664	2531	824	583
COBS01766	0	52	33	163	350	12	260	190	152	311	283	43	750	324	250	48	513	220	341	116	173	392	204	217
COBS01767	199	1944	630	579	602	352	801	999	601	1153	754	3063	4533	1725	1474	3603	4011	4334	1848	1967	3374	5316	2639	4125
COBS01768	0	12	30	3	2	44	6	7	1567	26	2	14	21	20	1061	4	5	45	6	20	23	1999	13	6
COBS01769	1	103	105	131	183	42	137	219	280	178	144	162	346	207	229	164	357	334	367	145	201	418	303	246
COBS01770	245	8162	1009	1411	1716	856	1723	1303	2706	1834	1185	8612	7590	3550	3175	10301	8629	8334	4104	9903	10992	13549	6047	10161
COBS01771	0	71	77	79	93	42	125	73	0	151	70	192	511	232	172	193	442	680	294	181	269	454	422	322
COBS01772	0	339	0	20	249	18	9	3	261	8	22	276	2911	158	111	139	935	82	206	125	35	1480	27	24
COBS01773	0	53	1	21	73	5	2	16	75	8	0	21	339	21	121	19	166	69	23	68	43	466	32	37
COBS01774	313	228	270	54	236	83	44	54	915	239	68	179	703	59	283	105	341	588	61	216	166	841	218	179
COBS01775	0	5	2	0	1	2	19	0	1	4	0	1	6	0	3	0	2	17	1	0	0	7	10	5
COBS01778	1626	2085	1333	3185	3132	789	3144	2994	3160	2952	2869	1518	4189	2249	5751	1272	4897	5106	3624	2368	1798	4605	4400	1777
COBS01779	0	31	175	291	465	71	504	394	387	418	414	54	240	136	690	44	346	399	292	116	57	269	517	58
COBS01780	557	249	78	878	157	34	169	133	31	131	165	161	363	553	680	35	282	324	261	85	51	226	397	48
COBS01781	1	25	65	347	313	84	356	188	119	248	264	26	120	80	320	26	132	195	150	52	39	81	192	29
COBS01782	3868	13336	2180	2054	268	850	7042	5000	1326	6268	5358	2922	307	1107	175	5448	338	2394	1274	1865	4054	377	2630	3614
COBS01783	1	88	143	528	149	83	1112	927	40	659	914	48	19	199	26	42	55	187	266	16	58	52	282	83
COBS01784	12	0	409	37	23	278	29	49	1	15	25	5	16	23	19	1	22	23	45	13	4	21	1219	4
COBS01787	2	103	57	443	604	31	282	376	99	217	488	35	462	379	430	47	629	123	723	104	72	416	334	53
COBS01788	1	6	13	5	9	4	1	0	20	0	10	0	4	11	112	0	2	25	8	1	4	286	9	3
COBS01789	0	5	3	7	4	0	4	3	100	11	0	0	4	2	51	0	1	5	2	3	1	78	3	1
COBS01790	2	0	10	1	7	39	7	8	9	3	19	1	9	7	13	0	4	5	16	2	0	50	22	0
COBS01791	1	427	328	196	326	138	431	380	635	490	495	314	862	445	431	331	1076	1713	482	449	471	1051	697	583
COBS01792	1641	212	2222	218	264	349	415	383	529	355	291	147	810	334	406	156	738	628	409	208	256	853	339	222
COBS01793	1	5	16	7	58	9	8	12	58	7	21	6	58	27	34	3	72	11	52	10	5	57	10	5
COBS01794	0	19	90	31	18	38	28	84	87	87	48	48	33	22	82	7	22	47	8	39	8	66	72	6
COBS01795	722	1525	446	311	238	212	913	1120	365	964	713	1381	1463	877	502	1493	1113	2307	801	1193	1784	1634	1584	1622
COBS01796	783	1473	669	969	1348	317	1254	966	772	1083	1449	785	2499	1342	1691	927	2991	2907	1667	1093	1524	3127	1714	1234
COBS01797	51	429	255	462	885	214	576	523	831	508	618	384	1432	936	1291	552	1693	1860	1141	665	806	1710	1281	691
COBS01798	97	256	163	175	378	78	258	180	381	222	214	190	979	395	367	180	1009	790	440	207	221	1231	499	242
COBS01799	3290	1003	2118	5535	592	1319	7405	8794	885	16032	7341	792	2038	5110	1441	1016	1274	4666	8080	1174	1305	1405	23784	769
COBS01800	797	1032	345	453	386	258	634	787	612	605	409	441	731	419	466	588	723	1231	512	709	1601	921	1013	562
COBS01801	451	740	924	433	531	606	590	725	654	776	599	496	1209	574	612	389	1207	2503	746	591	615	1342	1196	755
COBS01802	96	1279	461	291	328	237	591	556	437	710	656	1291	1517	840	774	1700	1485	2396	1013	1017	1477	1684	1503	1776
COBS01803	242	1053	660	552	670	275	1235	832	961	1748	975	533	1201	799	409	508	1142	1626	962	499	633	1131	1375	741
COBS01804	282	379	285	359	244	143	612	711	250	1368	535	456	1020	964	268	551	1019	1072	1077	367	471	1177	2583	454
COBS01805	0	223	86	173	181	55	301	319	6	293	234	188	620	381	320	193	845	722	473	235	266	966	653	265
COBS01806	282	188	127	69	109	24	125	223	182	160	111	202	415	198	210	278	381	577	255	190	314	570	303	292
COBS01807	135	840	312	529	953	147	926	734	1121	705	662	552	2194	977	1270	709	2715	1698	1220	932	1163	2744	1304	911
COBS01808	0	310	90	154	243	42	219	206	179	250	171	180	482	255	281	234	606	368	366	206	286	735	375	196
COBS01809	1294	2088	1180	924	1622	654	1092	1198	1266	1213	981	1555	2552	1107	1803	1227	2469	5237	1510	1689	1644	2614	2542	1950
COBS01810	1722	5585	1528	1166	1381	798	1798	1897	2477	2377	1302	3238	3920	1948	1746	3297	3889	6514	2318	4282	2871	4599	3687	3047
COBS01811	0	5	22	8	13	4	2	11	106	12	6	8	9	5	47	7	4	32	15	35	6	51	33	5
COBS01813	0	0	6	18	11	12	12	12	0	7	8	0	6	10	12	0	7	17	32	1	1	13	52	0
COBS01814	357	110	464	811	744	380	1237	1028	460	1769	1768	40	1015	1209	676	40	1370	1513	2579	98	88	852	3085	54
COBS01815	0	0	5	11	9	0	19	11	0	11	20	0	2	8	9	0	7	12	20	1	2	4	12	0
COBS01817	0	2	60	17	14	19	15	3	0	27	21	1	7	12	20	3	11	163	20	3	6	16	79	3
COBS01818	0	0	55	28	14	21	22	21	0	54	45	6	9	16	25	5	12	210	20	9	5	19	82	5
COBS01819	0	0	1	18	10	6	25	1	15	22	0	0	0	2	15	0	2	24	12	5	0	0	12	0
COBS01820	421	195	215	227	2134	176	212	242	1490	457	256	114	1764	262	1986	235	1980	1288	405	578	314	2274	681	821
COBS01821	239	8	0	0	16	1	9	2	0	8	0	5	9	5	20	6	10	14	9	12	17	10	17	13
COBS01822	214	15	17	30	116	12	32	9	83	15	20	11	70	13	82	15	100	66	22	39	18	106	33	63
COBS01823	2153	5014	2628	3172	4680	1248	5377	5236	4033	6304	4429	2096	5920	3155	4172	3934	5701	8228	4524	4572	5143	6302	6687	3221
COBS01824	3971	3914	3606	7853	7233	2213	8632	8799	4860	8615	9908	3020	11347	8275	9561	3220	12251	20903	12313	5155	4250	12206	15179	4137
COBS01825	224	2056	1169	1136	1445	594	2039	2320	2212	2350	1950	1404	4003	2086	2482	2743	4031	5982	2470	2750	3289	5513	4464	5137
COBS01826	0	156	134	171	274	56	270	319	217	245	199	195	534	260	304	195	640	861	310	252	312	609	394	343
COBS01827	3251	3732	1893	3916	4012	1204	4898	4680	3778	6566	5595	1978	3999	3456	3627	2035	4796	6592	5056	2558	2286	3781	7372	2421
COBS01829	1	10	2	22	44	13	11	4	0	11	9	4	62	26	36	4	72	8	43	18	29	86	24	21
COBS01830	0	0	0	0	9	0	9	0	0	17	0	0	6	4	8	0	5	4	11	3	2	7	7	2
COBS01831	2025	2907	1380	2326	4193	987	2385	2190	5127	2527	2334	2314	5996	2202	5535	2527	6290	5167	3035	3558	3624	7331	3501	3491
COBS01832	948	1237	552	4392	253	840	1026	443	2111	994	1626	3	5	2	1	3	1	4	5	1	0	5	3	4
COBS01833	1050	2959	1284	2281	911	857	4063	3671	2002	11273	3852	3004	5512	5419	1733	3961	5070	4892	6950	2785	4025	5711	18444	4353
COBS01834	830	777	751	275	705	249	690	588	1146	747	424	403	831	326	398	348	840	1848	443	415	449	1009	706	509
COBS01835	650	5273	935	763	1236	444	1362	1246	2860	1087	1311	4304	4954	1978	1772	7101	4894	4344	2384	3134	7861	5797	2643	9078
COBS01836	496	1159	471	532	652	433	927	719	1169	939	683	1034	2044	1172	1112	1335	2087	3785	1397	1423	1341	2376	2117	1602
COBS01837	49	249	206	277	474	95	492	512	773	488	436	157	798	437	498	147	984	773	610	220	218	923	660	230
COBS01838	1333	1576	700	793	1567	380	973	902	1774	1007	908	1005	4170	1511	2566	1164	4163	4075	1776	1761	1904	4926	2280	1732
COBS01839	4148	3239	2302	3465	6673	1250	4329	4076	5695	4736	4419	2037	8801	3481	6893	1980	8941	9392	5153	3721	2860	9513	5542	2752
COBS01840	0	0	1	6	26	2	16	15	0	7	21	9	34	22	32	3	43	22	44	25	26	42	31	9
COBS01841	1990	1991	2656	6035	2515	1824	8609	6489	1212	8096	6985	1490	4672	6537	2506	1721	4945	10369	9527	1972	1774	3736	9615	1431
COBS01842	1506	1032	585	674	1038	236	1168	966	2464	1212	1055	303	1117	566	657	380	1360	1491	861	490	517	1636	1015	459
COBS01843	8635	7466	6657	3285	5396	3025	4998	5060	7579	8334	5200	5071	10994	5065	7009	4535	9767	30429	6398	6458	6763	10854	11910	7154
COBS01845	0	70	80	37	56	12	72	48	221	88	123	32	72	43	33	27	63	118	36	42	32	86	46	44
COBS01846	261	895	507	368	690	256	705	465	1071	776	540	864	2037	804	1225	638	1996	3085	953	1060	1091	2409	1461	1095
COBS01847	912	3331	909	872	1169	434	1441	1600	2296	1645	1197	2712	3922	1922	1834	2831	4196	5253	2328	3100	3672	4844	2850	4185
COBS01849	192	1015	464	318	433	175	535	546	1093	686	470	555	759	375	313	500	648	999	398	423	490	807	473	602
COBS01850	246	483	235	334	483	150	403	380	1109	478	481	469	1129	558	554	376	1191	1136	701	534	503	1322	797	565
COBS01851	0	615	231	391	471	179	444	415	389	570	401	475	1222	621	745	411	1184	1625	765	669	468	1411	1184	429
COBS01852	859	1845	892	934	994	366	1338	1291	1236	1654	1450	1349	2009	1202	1144	1526	2160	2929	1547	1113	1201	2371	2056	1399
COBS01853	640	546	360	242	396	163	331	398	691	391	290	527	1467	1179	779	308	1215	2089	655	488	467	1362	1064	510
COBS01854	926	960	328	373	943	213	611	526	1486	738	681	655	1988	597	1464	667	2080	1475	718	1021	1247	2757	884	1121
COBS01855	386	1715	957	1018	1679	419	1380	1311	1491	1592	1485	1319	3575	1810	1912	1665	3812	4702	2439	1574	2021	4361	2702	1876
COBS01856	0	133	139	159	91	72	147	117	216	155	53	188	280	168	129	178	280	518	240	148	145	310	342	234
COBS01857	2263	10410	1803	1839	658	954	3795	3735	1861	5708	3398	9280	3070	3876	1719	15402	3398	11162	4102	3927	9096	3870	12304	14848
COBS01858	341	1315	594	669	618	307	1102	1350	975	1085	735	1316	1961	1012	1046	1141	2004	3653	1268	1217	1512	2357	1645	1603
COBS01859	166	283	150	1405	1501	99	1255	1474	389	1002	1295	182	1976	1873	1171	140	3132	906	2939	396	555	1838	1907	209
COBS01860	129	739	153	470	242	153	720	613	199	536	592	195	389	619	331	149	502	880	947	415	817	457	1140	244
COBS01861	2878	5936	1550	1206	1093	833	2241	2420	1665	3953	1668	3216	3030	2229	1304	2421	3096	7369	2652	3824	2799	3425	4903	1648
COBS01862	381	537	384	245	549	180	459	470	1007	561	349	402	1097	579	708	386	1159	1561	565	473	564	1342	711	515
COBS01863	1963	2660	1990	1435	3329	1093	2508	2351	4276	2521	2094	1743	3495	1480	3127	1591	4157	4672	1956	2824	2197	4236	2451	2124
COBS01864	3060	1566	2603	139	758	831	168	150	2041	909	110	816	616	138	1705	758	582	7780	229	1319	1455	989	1613	1556
COBS01865	1088	672	349	472	752	246	549	592	425	670	561	559	2102	922	1020	522	2049	2084	1115	851	931	2842	1169	934
COBS01866	0	16	11	22	133	2	9	18	12	16	39	17	276	177	117	13	648	18	257	25	17	309	58	18
COBS01867	0	207	153	128	302	73	283	196	297	324	187	170	428	233	248	122	478	479	231	153	181	502	303	198
COBS01868	1152	2641	1165	815	2548	500	1678	1464	4163	1841	1136	1116	3418	1010	2426	1132	3185	3260	1119	1604	1821	4463	1736	1576
COBS01869	0	43	9	20	907	2	2	3	3	6	1	10	249	11	116	4	229	20	5	15	9	269	15	3
COBS01870	156	10	38	62	122	36	29	33	0	55	40	26	69	28	130	10	126	120	58	51	25	96	87	13
COBS01871	0	41	37	359	321	29	161	177	155	103	214	31	655	854	519	30	1042	241	1066	73	33	474	396	46
COBS01872	2	65	16	117	635	8	95	45	965	117	174	112	3553	406	2769	88	3563	173	568	233	263	4301	300	337
COBS01873	0	297	172	898	1594	119	473	568	1846	552	630	461	4788	1350	5240	435	5502	1397	2356	895	778	6215	1830	912
COBS01874	555	118	514	253	210	334	324	290	290	434	268	70	497	293	491	53	527	2945	466	103	93	665	1129	144
COBS01875	8793	13035	7072	9925	5134	4630	14079	13707	10106	19736	11882	5781	12429	11125	4845	5215	12204	20938	14087	6808	6217	13496	20616	6059
COBS01876	316	1281	509	441	257	259	997	851	1033	1454	786	475	1184	1036	319	381	1054	2088	1115	613	587	922	1435	500
COBS01877	3339	4382	5795	4780	7866	3030	9062	10514	4256	9128	8305	2951	20565	10078	5044	3451	12461	17139	12545	3444	4221	18126	17280	3630
COBS01878	3	145	51	165	193	43	233	253	87	143	128	157	717	424	519	193	851	615	653	267	230	813	507	310
COBS01879	0	189	194	410	632	80	498	523	127	524	706	258	1568	1111	848	179	2099	1367	1622	577	405	1769	1168	253
COBS01880	3	619	708	91	346	284	178	166	314	333	114	489	839	183	811	349	787	4057	222	990	680	694	913	756
COBS01881	354	341	185	183	269	112	269	231	281	419	185	369	715	293	323	332	635	1127	370	349	354	856	576	626
COBS01882	0	65	660	200	244	446	439	265	123	150	253	243	1151	667	918	240	1080	988	990	460	434	1138	726	413
COBS01883	2678	4432	3262	5616	7876	1423	7580	7921	5186	6664	9036	2255	9130	5663	7083	2413	9300	8892	8159	4196	3426	9517	6877	2968
COBS01884	7990	6047	2631	3958	6779	1139	5426	4729	8194	5612	5233	1674	4863	2604	4314	1908	5941	5636	3660	3145	2392	5078	4286	2315
COBS01886	0	106	45	97	276	46	186	155	254	192	148	48	124	80	97	28	132	119	75	78	63	146	95	44
COBS01887	1233	2254	1071	2162	3992	600	2281	1709	4198	2638	2436	628	4367	1510	2454	915	3843	3131	3479	1052	1248	4660	2697	1215
COBS01888	367	876	500	825	1171	188	986	811	1560	946	965	223	746	446	754	217	1001	758	681	327	323	854	699	291
COBS01889	802	1096	900	1279	2214	821	1337	1372	1439	1406	1257	1468	4550	1928	4235	1354	4632	8531	2747	2361	2078	4923	4096	2157
COBS01891	605	503	457	364	611	184	446	437	1031	614	570	216	592	242	458	214	621	893	308	329	294	818	470	363
COBS01892	2181	4248	2986	4527	8951	2019	4491	4494	9044	5204	4765	3477	16985	6766	15623	3544	16839	18905	9313	7182	5989	19245	10877	5232
COBS01893	322	197	156	391	573	131	230	285	562	174	197	139	827	382	998	183	1015	791	507	391	297	1227	710	351
COBS01894	7230	8172	3879	2135	2727	1490	3914	2832	9816	5445	4675	2930	4674	2511	3084	3316	4538	9188	3395	3213	3568	5813	5925	4987
COBS01895	166	1018	852	683	672	435	1185	1077	1105	1328	783	1450	3036	1660	1117	1892	3093	4044	1964	1108	1639	3651	2517	2044
COBS01896	1142	3445	1963	1859	3027	1005	3339	3011	2709	3331	2648	2508	6432	2707	3394	2809	5633	8433	3255	2553	3733	6458	3665	3670
COBS01897	0	467	163	492	585	101	529	450	782	615	552	311	1267	632	1011	346	1477	982	810	510	501	1876	826	366
COBS01899	2	96	58	310	491	49	387	259	129	231	270	140	1527	755	497	121	1036	563	1161	188	183	1203	720	175
COBS01900	0	107	69	79	217	43	119	100	143	162	102	91	834	286	328	85	755	633	294	225	200	847	298	190
COBS01901	2401	1709	1282	1848	1833	824	2621	2573	1956	2380	2588	1030	2759	2286	2357	1007	3471	5526	3013	1713	1378	2776	3271	1548
COBS01902	377	1034	494	387	841	350	397	505	2009	700	393	716	2690	661	1478	625	2541	2808	879	917	1126	3464	1391	1324
COBS01903	1116	2757	2015	1884	1915	872	3337	3253	3218	2964	2798	1362	4618	2674	2054	1798	4529	5283	3422	1726	1829	5737	3885	1797
COBS01904	658	897	452	504	546	218	680	718	616	962	745	589	1168	688	555	539	1273	1882	951	482	545	1445	1520	607
COBS01905	5	89	91	98	82	70	132	122	178	119	143	74	233	94	134	75	180	297	155	142	143	319	225	128
COBS01906	323	1046	503	590	707	224	1317	955	902	1205	943	552	1420	787	719	668	1412	1271	1021	597	825	1603	1308	744
COBS01907	974	721	265	331	374	96	624	412	209	593	422	273	487	237	234	365	419	639	294	255	380	577	354	414
COBS01908	762	3624	658	1480	1066	461	1766	1663	740	1996	2135	3765	3128	3081	1801	6662	3734	3823	3888	3823	4357	2608	3648	8901
COBS01909	135	0	22	28	29	15	57	40	0	48	70	16	54	34	40	20	58	92	57	34	19	37	62	19
COBS01910	50	8	20	12	16	6	21	14	0	31	13	17	23	16	25	5	27	58	25	30	16	47	56	16
COBS01911	416	495	592	248	370	214	365	251	516	457	203	207	505	250	254	164	417	1436	312	269	200	535	566	247
COBS01912	1674	1464	1133	844	1662	674	1364	1216	1285	1539	1184	1350	2643	1345	2090	859	3483	6436	1776	1737	1388	3050	2245	1408
COBS01913	2506	3070	2199	2689	4746	1079	4082	3972	3005	4319	4290	2101	5734	3079	4494	1717	5866	7610	4176	2837	2677	6144	4721	2273
COBS01915	151	327	174	255	639	127	181	247	859	282	261	453	1246	338	756	445	1223	801	485	477	585	1419	511	604
COBS01916	1	260	294	1873	4040	117	1690	1647	1444	1245	2413	88	3079	2563	1976	98	4395	589	3127	298	185	2532	1374	148
COBS01918	1	17	10	23	13	1	14	1	16	21	3	4	3	3	3	3	3	3	4	2	0	5	4	5
COBS01919	2031	6821	1049	2990	3269	792	1859	1867	2728	1539	2866	3517	1153	1040	3044	4905	1662	2921	1856	8000	5836	1674	1872	6328
COBS01922	0	129	39	180	162	50	156	73	12	118	259	76	14	30	77	72	30	85	60	190	95	24	51	121
COBS01923	1357	106	450	2339	1142	231	2462	2564	274	3077	3582	44	657	1670	599	29	1132	663	2564	101	46	366	2392	22
COBS01928	772	496	329	3226	10181	305	2236	2329	2068	1478	3103	289	6333	2981	6049	274	8397	993	4369	1258	780	6041	2000	450
COBS01929	0	0	24	5	18	7	3	17	0	2	14	0	12	17	15	0	23	7	12	5	4	12	8	2
COBS01930	0	204	72	279	518	18	314	335	314	221	293	117	659	364	618	111	1034	129	610	325	226	908	285	184
COBS01931	795	702	451	549	206	191	784	554	272	958	557	972	832	1134	548	1113	648	2049	1181	643	998	987	1881	1083
COBS01932	141	215	150	37	207	37	140	140	159	273	149	255	718	252	379	235	710	870	282	289	265	826	449	262
COBS01933	1	44	16	25	5	5	15	6	0	1	3	51	9	42	4	53	6	54	31	52	105	6	28	46
COBS01934	203	774	553	265	201	206	333	253	478	424	311	568	450	331	379	462	546	2190	337	714	667	537	809	796
COBS01935	443	444	330	256	704	159	449	489	1004	505	301	305	1762	346	1054	266	1499	1397	531	650	427	2635	650	319
COBS01937	248	19	7	0	6	11	11	5	0	1	0	1	4	4	1	2	5	8	2	6	5	2	9	2
COBS01938	429	738	383	339	555	181	651	521	598	584	567	729	1101	553	609	621	1141	1933	551	716	708	1223	785	837
COBS01939	2	273	764	261	540	317	518	365	486	362	306	133	648	140	592	95	627	872	240	260	258	839	379	217
COBS01940	1	0	8	23	14	3	25	29	1	31	22	5	23	15	15	4	27	29	31	12	10	22	22	12
COBS01941	31	101	47	109	261	61	200	136	49	128	118	80	501	115	487	96	505	434	182	212	192	661	336	170
COBS01942	0	222	192	475	508	88	551	592	659	707	702	306	2051	970	673	282	1747	826	1592	420	398	2131	988	259
COBS01943	160	459	178	436	645	140	528	557	582	463	570	258	850	490	588	259	1024	717	693	298	367	1077	594	312
COBS01944	1	400	248	274	424	139	408	404	684	446	426	447	1676	986	905	389	1894	1762	1084	568	659	2007	904	708
COBS01945	0	209	104	145	316	79	235	228	101	266	310	224	686	245	294	185	648	728	268	229	254	630	303	281
COBS01946	256	3267	613	680	616	429	1043	779	837	1097	764	2850	2614	1528	1151	2927	2559	3099	1796	2385	4028	3415	2744	3270
COBS01947	397	586	414	351	515	264	751	666	1024	816	823	539	1289	650	810	604	1453	2291	883	574	695	1745	1352	767
COBS01948	238	1764	220	179	370	105	478	468	956	470	317	789	722	346	379	737	776	743	363	636	1095	1016	502	789
COBS01949	0	15	116	20	21	69	23	14	57	6	35	32	46	22	29	35	36	113	22	34	49	68	49	50
COBS01950	0	40	0	58	50	8	11	32	74	43	28	26	146	69	252	29	215	94	83	97	109	283	114	74
COBS01951	1203	1352	617	753	1952	356	970	1099	2432	1145	1038	1478	3999	1459	4833	1470	4453	4890	2008	3196	2803	5363	2773	2500
COBS01952	0	14	0	0	7	0	5	2	0	0	9	3	9	3	3	1	2	4	1	2	4	3	6	3
COBS01953	0	62	170	386	267	125	516	454	835	908	273	70	1350	323	2020	83	1489	947	911	270	187	1992	4037	188
COBS01954	2383	3790	2249	2940	1055	1187	5475	4844	1888	11000	4534	2003	4059	4448	1461	3033	3687	5224	6592	2352	2569	3655	16535	2919
COBS01956	2067	935	1300	3576	3222	844	5341	4869	1544	3390	4550	988	6195	5284	3214	1316	7587	7514	7173	1443	1833	7802	9761	1935
COBS01957	0	4	41	46	73	21	214	115	34	68	110	14	64	53	36	14	101	119	101	27	20	83	88	17
COBS01958	0	207	129	131	2767	95	116	171	296	173	159	94	2952	209	319	98	402	317	207	229	126	2262	222	121
COBS01959	7384	5859	3986	10452	11046	2597	10114	10499	7218	9390	11892	3476	9583	8783	9037	3587	10671	14939	12304	5407	4218	10194	12582	4111
COBS01960	0	601	72	121	174	80	181	263	202	251	113	719	648	297	284	829	761	979	407	572	917	922	558	482
COBS01961	1	65	166	12	40	105	38	24	76	88	11	89	186	61	192	47	162	1161	78	170	101	248	276	97
COBS01962	128	223	123	52	41	38	107	91	123	75	32	378	225	216	222	314	362	1093	254	560	410	351	545	444
COBS01963	3453	5136	3718	6714	9523	1821	10144	9882	9340	9661	10482	3165	14381	9310	7135	2986	16077	10790	11109	3972	3631	14005	10414	3337
COBS01964	2172	2080	1434	1917	2798	678	2797	2499	4712	2711	2889	1079	3964	2146	2579	935	4604	3813	3316	1583	1347	4084	2911	1322
COBS01965	1442	2164	1150	915	1342	548	1465	1222	2947	1741	1400	1060	2800	1468	1924	1112	3067	4057	1609	1504	1752	3324	2243	1930
COBS01966	2927	2156	1571	1082	2579	693	1578	1579	2308	1651	1607	770	2508	1084	2205	885	3098	4968	1327	1371	1267	2985	1750	1075
COBS01967	0	0	0	6	4	0	4	1	0	0	16	0	0	1	0	0	0	3	0	1	0	0	2	0
COBS01968	4619	2378	2808	5061	906	1508	8400	8702	1076	17575	8556	1443	2603	4959	1657	1951	2612	9270	8033	1182	1167	2755	25006	2040
COBS01969	382	1978	876	1725	1339	613	1735	1389	1394	1765	1360	829	2120	1382	1644	1356	2547	3759	2314	1480	1102	2867	3306	1136
COBS01970	0	9	3	21	12	22	32	15	0	15	11	39	58	56	89	32	81	106	94	47	30	78	99	26
COBS01972	0	1	4	2	32	2	43	20	70	16	29	4	14	7	10	2	11	16	10	6	3	11	7	2
COBS01973	270	19	20	22	29	4	44	16	27	29	28	0	2	1	15	0	3	13	4	6	2	8	5	3
COBS01974	0	17	3	36	22	4	37	23	0	28	32	12	51	36	39	13	69	53	69	14	20	80	83	24
COBS01975	0	113	43	143	117	36	133	104	0	128	70	109	351	136	182	101	365	271	186	146	183	442	196	182
COBS01976	0	239	124	129	241	75	216	153	419	230	167	182	714	226	481	220	677	763	313	240	318	1095	401	288
COBS01977	0	319	141	205	454	87	276	280	436	353	203	317	869	392	510	348	990	682	487	457	532	1121	493	429
COBS01978	1	1339	579	769	1125	275	1257	1219	1524	1141	1111	1110	3043	1627	1353	1162	3289	3195	1825	1381	1294	3331	2018	1275
COBS01979	0	84	34	54	138	28	157	131	116	132	80	80	181	94	88	99	199	178	106	103	113	246	148	101
COBS01980	656	719	613	418	706	221	723	793	1291	786	683	385	823	436	563	308	986	1433	567	465	468	1154	823	455
COBS01981	22778	6914	10609	7801	18678	6580	7795	7070	17600	11916	7494	4119	26184	7458	20590	3032	20478	38363	9074	7520	8085	25795	18490	6618
COBS01983	0	449	168	77	133	108	165	149	219	184	121	533	592	253	293	516	651	800	299	534	618	950	585	588
COBS01984	943	380	201	203	322	49	487	313	784	478	442	126	351	242	187	199	425	288	287	165	163	508	232	159
COBS01985	0	4	10	6	6	4	7	3	188	6	0	0	11	2	62	3	3	48	1	3	1	146	16	1
COBS01986	174	364	158	559	2348	104	416	272	793	466	708	246	2607	1035	1028	285	2486	317	1517	334	358	2724	664	330
COBS01988	0	5	0	0	0	12	0	0	10	0	0	0	5	0	0	0	0	34	4	1	0	1	11	1
COBS01989	2	2	9	0	1	1	5	4	0	13	0	0	2	5	12	0	3	32	1	2	0	10	33	0
COBS01990	0	0	16	0	7	2	6	9	5	7	0	351	0	1	3	167	0	18	4	1094	0	3	26	2
COBS01991	16	78	27	38	288	29	8	61	351	74	56	52	816	116	631	70	572	178	173	92	191	1049	164	160
COBS01992	0	29	12	21	8	19	13	6	0	36	20	18	11	13	45	3	8	131	15	24	5	68	62	4
COBS01993	1243	1436	756	1167	1811	448	1431	1475	2084	1403	1486	1130	2432	1131	2257	964	2722	2958	1675	1832	1431	2532	1829	1383
COBS01994	350	415	249	138	279	78	250	239	456	312	232	152	430	213	152	169	356	496	277	153	174	457	306	223
COBS01995	1396	217	246	1061	492	166	774	734	574	638	1319	63	635	1033	539	43	1074	950	1640	198	122	605	778	89
COBS01996	505	175	731	7	2	446	8	14	0	316	1	39	41	16	81	10	11	4282	38	94	16	115	1051	143
COBS01997	0	0	15	26	10	12	20	14	0	24	33	1	13	12	12	0	22	123	16	7	9	18	49	2
COBS01998	387	339	165	309	453	115	328	246	533	324	281	226	869	394	550	313	925	1021	504	381	411	1132	535	384
COBS01999	583	841	287	205	174	168	351	413	705	359	144	467	1846	425	321	572	1321	2619	518	744	948	2866	1188	631
COBS02000	855	2158	1032	932	905	506	1628	1778	1095	2618	1142	2435	1368	1084	1039	2830	1217	4286	1413	3174	5717	1428	3899	5879
COBS02001	368	1185	459	508	360	212	1072	846	654	928	717	797	672	569	304	1058	854	1246	792	770	1139	869	793	887
COBS02003	1	149	32	109	147	56	104	157	232	163	88	191	570	203	353	123	487	836	228	253	312	724	371	325
COBS02004	0	268	75	149	222	56	180	136	47	132	90	216	430	195	213	218	719	326	340	252	216	606	254	218
COBS02005	1170	1106	463	483	458	211	519	430	804	573	376	581	929	461	656	503	962	2242	563	825	767	1147	1091	735
COBS02006	6587	3752	3266	4339	7335	2169	4708	4657	6320	5349	5282	2784	12847	5358	13002	2691	13135	17033	8318	4851	4580	13847	9693	4723
COBS02008	1650	482	883	3779	2438	474	4387	5092	1045	2639	5344	359	1591	3214	1638	163	2463	3322	4918	875	339	1509	3690	224
COBS02009	1633	940	483	355	497	227	689	626	1403	781	445	279	771	476	448	349	881	1026	552	387	412	1031	764	354
COBS02010	1155	526	351	361	602	167	774	878	866	838	601	326	819	327	431	261	712	909	523	294	328	757	548	372
COBS02011	0	288	96	204	353	74	180	151	265	229	183	183	396	170	271	188	408	488	252	252	185	443	303	202
COBS02012	0	37	217	144	50	298	197	127	9	101	53	6	105	104	61	6	160	143	169	4	5	131	209	4
COBS02013	1616	1022	621	428	619	222	806	688	1138	907	719	492	734	380	367	538	687	1484	452	390	292	943	768	414
COBS02014	0	15	2	1	0	0	1	0	0	7	4	1	1	1	1	0	2	10	3	1	0	4	3	2
COBS02015	0	41	108	119	49	37	234	189	0	272	221	10	252	150	92	17	250	392	184	40	22	254	400	29
COBS02016	4445	1696	2246	3825	5202	1468	4174	3396	1977	3800	3973	1137	3248	2104	3655	1323	3651	8131	3422	2061	1603	3131	4745	1209
COBS02018	27	37	119	263	459	80	225	167	35	190	212	19	118	45	162	27	125	279	107	66	35	114	189	30
COBS02021	265	0	28	119	54	27	56	16	0	51	42	7	23	28	60	11	38	94	32	24	21	33	98	6
COBS02023	1	19	4	61	42	3	28	27	0	22	35	6	23	15	62	3	16	35	27	15	8	12	53	2
COBS02024	0	17	23	120	151	31	60	85	0	87	93	17	66	62	241	17	107	249	148	56	36	53	218	24
COBS02026	0	0	3	17	8	0	8	11	0	2	2	5	15	23	42	3	26	25	42	19	17	15	42	3
COBS02027	0	5	43	14	9	14	6	14	64	44	3	3	15	5	13	1	12	72	12	12	6	9	42	5
COBS02028	0	217	111	50	180	42	106	112	309	99	87	143	286	82	171	127	299	415	105	184	183	412	183	221
COBS02029	1765	1649	2151	894	1372	1817	1613	1529	1867	1799	1297	1248	4813	1654	2034	1255	4498	8288	2093	1677	1752	5947	3371	1757
COBS02030	0	49	29	39	20	14	58	37	30	43	48	105	125	60	88	89	101	173	95	80	68	195	152	85
COBS02031	1028	1131	672	614	833	310	949	679	916	909	864	948	2080	1067	1177	919	2254	4234	1480	1356	1214	2485	1949	1280
COBS02032	2	985	103	554	2690	62	632	641	2473	479	524	381	1847	296	2100	453	2401	404	442	1028	879	2346	419	646
COBS02034	0	113	36	20	48	5	28	46	59	40	13	167	219	160	49	223	251	139	190	140	204	231	137	148
COBS02035	0	0	0	3	9	6	12	8	0	8	1	0	4	3	4	1	1	8	6	0	0	5	4	1
COBS02036	1491	275	615	7924	7514	562	4970	3966	1820	3225	6557	180	1855	3102	3432	169	3004	1154	4904	753	287	1449	2475	204
COBS02037	343	692	217	371	825	160	455	366	390	470	479	383	658	428	256	455	779	1127	577	281	577	526	765	611
COBS02038	151	1447	1010	622	1259	434	929	916	1948	1086	869	590	1534	619	1216	477	1501	3230	848	1004	788	1823	1400	758
COBS02039	288	8439	588	616	1408	346	865	898	820	905	1311	5929	4780	1720	1253	11918	5043	3751	2192	3619	11012	6742	2462	14418
COBS02040	2371	1873	2187	3274	1397	1076	6240	6056	1252	17572	6933	1241	3298	5537	2240	1674	3803	7600	7514	1620	1558	3192	25920	1846
COBS02041	1	162	14	10	144	0	194	23	1	105	103	4	24	12	9	6	11	14	5	4	7	12	7	7
COBS02042	10988	10874	4570	9975	11759	2762	11378	11671	13571	10162	12594	7289	21698	13336	15485	12067	25212	18224	18828	9611	10353	25757	18796	11860
COBS02044	143	238	152	75	85	68	135	137	226	161	64	388	465	207	198	311	454	890	210	352	297	532	422	536
COBS02045	8092	5306	4957	5656	6227	2874	6938	6843	6846	8390	6419	2738	5950	3984	3994	3309	7224	16094	7288	4753	5251	6732	8550	4600
COBS02046	19	1	5	3	9	8	11	15	1	7	1	85	6	12	40	30	31	24	18	1031	2257	11	26	5825
COBS02047	0	822	44	47	4	14	34	183	3	63	13	778	11	53	64	1969	22	718	61	14303	13470	12	199	17187
COBS02048	3	199	57	280	484	60	182	176	521	122	227	222	687	299	713	223	789	290	430	588	415	967	546	428
COBS02049	0	24	0	1	17	3	7	9	1	4	0	3	13	3	27	2	16	6	23	10	9	28	4	7
COBS02050	0	48	27	158	253	20	81	68	275	59	114	79	183	93	247	26	250	113	139	113	35	249	116	26
COBS02051	0	18	16	92	160	18	63	48	0	63	70	27	104	74	267	11	146	131	133	102	30	125	164	33
COBS02052	0	3	3	31	15	1	19	25	1	14	68	9	35	24	76	7	29	32	24	15	9	17	32	9
COBS02053	1094	1188	1121	3380	6363	622	4189	3938	5758	3649	5579	569	4451	2540	3537	430	5756	2056	3662	1652	818	5064	2469	628
COBS02054	222	440	196	227	218	112	294	422	482	297	202	387	754	356	375	522	754	1076	407	478	864	906	706	784
COBS02055	505	523	462	129	189	196	168	131	194	320	241	306	404	276	235	215	450	1584	192	297	294	466	534	362
COBS02056	738	1193	649	301	708	284	794	547	1530	826	666	752	1198	476	669	656	1028	1682	427	608	806	1269	758	742
COBS02057	691	755	534	260	536	185	556	561	1063	589	534	406	622	240	375	355	586	969	274	351	475	898	541	374
COBS02058	914	448	164	414	568	188	429	540	361	411	418	578	1158	605	1229	447	1508	1715	886	1070	613	1429	1451	658
COBS02059	1857	2891	1353	5453	5362	823	4851	4853	3141	3625	4987	2094	7527	5270	5414	2579	8864	5163	8118	3050	2272	7416	5948	2793
COBS02060	0	188	4	11	2	4	6	5	0	28	13	86	9	7	14	85	4	73	40	129	173	10	32	94
COBS02061	171	1188	332	542	86	209	725	696	202	712	638	709	543	1104	150	1225	395	1444	1509	988	1640	703	1560	1596
COBS02062	315	1507	784	66	42	343	76	92	563	351	91	811	75	66	435	606	40	3553	132	942	1495	455	904	661
COBS02063	307	1242	337	1350	453	213	1125	967	371	1279	1410	1274	1524	3203	1444	1287	2137	2433	4127	1879	2871	1535	2901	1379
COBS02064	1365	2051	1872	4440	10894	1663	3764	3559	4293	3730	4110	2914	15831	5693	19296	2948	17085	15437	8667	8004	5710	17234	10910	5217
COBS02065	0	0	22	6	19	8	11	0	1	17	5	2	3	5	7	0	1	44	4	6	1	1	26	0
COBS02066	151	29	37	244	610	39	205	151	168	192	160	62	121	59	447	44	180	214	143	115	55	124	179	51
COBS02068	0	0	8	86	129	13	25	26	21	33	15	16	30	20	236	12	35	112	68	50	10	55	100	11
COBS02072	0	0	3	5	15	2	2	6	0	6	15	2	0	7	5	0	5	15	0	1	0	1	9	1
COBS02073	0	100	53	71	98	13	109	76	117	129	117	99	270	181	201	101	389	260	200	114	120	484	243	127
COBS02074	1509	2552	1622	1589	1884	662	2205	2110	2615	2632	2127	1109	2930	1747	1748	1218	2969	4597	1810	1355	1483	3276	2329	1466
COBS02076	0	0	14	5	3	6	5	5	0	12	0	6	12	4	6	7	19	26	6	19	4	13	19	9
COBS02077	1377	71	1447	616	33	916	75	218	6	34	55	0	3	7	3	1	6	8	89	7	2	10	1061	6
COBS02078	2	46	30	143	221	13	114	130	77	101	193	61	146	80	149	49	146	70	102	86	83	76	131	64
COBS02079	0	0	3	1	0	1	3	5	0	11	0	2	2	3	5	0	0	5	4	1	0	0	13	1
COBS02081	1	1	53	4	3	61	14	20	0	12	1	0	5	2	3	1	4	23	3	1	0	6	4	0
COBS02082	28	1089	697	888	946	282	1225	1150	1335	1180	1262	723	2187	1928	1057	711	2083	3082	1637	779	940	2086	1679	838
COBS02083	3281	2669	2215	971	1306	1077	1605	1391	3505	1988	817	1152	1187	574	756	856	1464	4041	726	1150	1088	1851	1670	1730
COBS02084	0	96	44	720	1634	64	412	429	192	256	595	109	1392	771	1656	122	2181	345	1253	458	316	1464	685	171
COBS02086	689	2140	742	617	750	442	990	1008	1914	1145	740	959	2021	1002	996	993	2286	2861	1250	1049	1252	2563	1874	1173
COBS02087	1	0	14	0	5	2	6	3	0	2	2	2	0	0	5	0	1	13	0	2	0	0	0	1
COBS02088	0	0	1	43	93	0	16	14	0	9	29	2	4	12	67	1	20	14	35	10	2	7	24	6
COBS02089	870	18	264	90	19	404	37	28	43	29	17	92	60	43	81	113	53	79	145	149	64	55	450	54
COBS02090	150	377	297	143	187	200	192	124	488	277	140	503	560	278	328	438	605	1374	328	419	480	639	559	819
COBS02091	249	337	283	222	327	102	419	382	531	423	470	340	788	421	428	366	858	1063	521	310	495	801	493	519
COBS02092	0	666	238	255	337	140	479	557	541	472	444	1311	1909	938	665	1726	2051	1897	1135	866	1287	2572	1306	1545
COBS02093	388	454	430	248	394	192	408	269	286	553	282	269	551	211	297	243	534	1172	269	333	335	630	534	449
COBS02094	685	3289	968	900	1065	639	1104	1329	1209	1913	1150	1308	1482	1037	698	2153	1574	3251	1149	1649	2058	1750	2559	1988
COBS02096	1616	4997	1994	1471	2407	921	2491	2357	3577	3163	2348	4140	6951	3042	4126	4497	6500	8737	3460	4195	5488	7757	4668	6047
COBS02098	896	300	515	2226	1100	340	2730	3082	307	2778	2952	233	677	931	667	223	752	1573	1812	331	218	548	2317	190
COBS02099	827	265	482	1954	1087	312	2358	2313	121	2403	2438	138	592	883	612	139	729	1533	1558	307	167	506	1985	128
COBS02100	0	0	4	16	12	4	30	9	0	21	24	58	5	9	13	58	8	18	33	3	1	11	35	3
COBS02101	0	38	4	24	31	3	11	12	26	12	9	12	27	9	27	4	19	47	14	13	12	39	27	17
COBS02102	1509	2273	1221	850	1369	503	1398	1360	2478	1730	1361	788	1724	748	975	818	1742	2468	975	956	1114	2122	1430	1031
COBS02103	12578	16655	8976	10844	13742	4762	13633	13970	10037	14176	13262	9139	16871	10996	12789	10048	18307	29792	15378	11297	10649	16517	19204	11021
COBS02104	1	14	10	3	11	3	2	1	1	3	0	3	8	4	8	1	3	4	9	3	4	2	19	1
COBS02105	0	12	0	11	41	4	25	13	1	5	16	17	59	45	92	29	76	69	58	24	35	70	52	24
COBS02106	7141	3827	1989	4113	9170	1401	5106	4232	11196	4798	5514	1575	6064	2237	7515	1506	6008	4596	3564	2947	2749	6064	3593	2570
COBS02107	149	73	29	120	265	40	146	164	305	118	114	100	384	104	509	91	360	201	191	165	147	454	206	179
COBS02108	0	9	9	45	61	4	23	11	33	22	11	34	133	50	266	39	138	81	86	70	76	149	114	57
COBS02111	0	5	8	63	72	4	12	9	45	36	28	45	126	39	336	35	145	102	84	63	82	128	84	40
COBS02112	0	42	13	56	103	30	87	79	102	91	74	75	317	124	158	43	307	170	148	95	92	383	130	91
COBS02113	1394	2987	1998	1606	3577	1238	1790	1273	4717	2091	1052	1630	7498	1939	6793	1596	8752	11999	3024	3871	3491	9199	5171	3251
COBS02114	5	0	5	1	13	0	8	0	1	2	3	0	0	5	1	2	1	3	4	1	0	5	1	0
COBS02115	7	51	12	94	133	36	24	38	0	14	14	64	189	408	242	36	89	106	71	97	38	116	90	45
COBS02117	0	74	35	268	422	66	158	176	64	154	125	56	173	68	671	50	213	300	148	162	86	188	269	85
COBS02118	8	28	24	0	27	1	30	29	29	39	29	0	2	0	2	0	0	0	1	0	0	0	0	1
COBS02119	1	0	2	2	5	1	0	1	89	14	0	0	3	0	2	0	2	1	2	0	0	5	1	1
COBS02120	0	0	0	11	2	0	5	3	1	1	0	0	1	0	4	0	0	1	0	2	0	1	1	0
COBS02121	0	1	3	6	7	1	6	11	4	4	10	0	0	0	2	0	0	1	0	2	0	0	2	0
COBS02122	1	0	0	8	0	0	11	2	1	2	3	1	7	34	4	1	0	1	5	0	0	1	2	2
COBS02123	208	49	311	85	61	186	76	89	180	200	141	38	102	83	223	38	99	1306	121	59	36	452	391	65
COBS02124	966	986	540	755	566	309	1153	945	728	1748	938	882	1124	744	490	872	988	1523	1048	660	797	1282	1597	910
COBS02125	2686	2824	1370	1208	1445	750	2037	1943	1443	2136	1884	1430	2442	2302	1264	1522	2427	4689	1458	1277	1354	2536	2709	1771
COBS02126	339	937	808	1266	930	561	1234	1133	929	1203	1123	990	3361	2576	1092	922	2320	3638	3102	924	1044	3319	2123	1105
COBS02127	15088	18960	13575	21041	31539	6722	31453	26529	22930	32084	28568	10509	30698	18675	29665	9082	33800	33715	24997	15534	11673	28769	26827	11345
COBS02128	0	14	21	82	117	28	49	34	55	33	48	11	58	44	94	11	64	78	69	36	20	49	63	12
COBS02129	0	47	52	203	281	40	152	134	3	84	221	40	153	145	364	38	215	225	244	94	62	128	269	58
COBS02135	282	147	189	1367	2283	203	956	1092	411	884	1342	187	1111	768	1890	140	1482	764	1340	375	172	860	1034	145
COBS02136	0	4	0	13	15	3	5	23	0	3	5	6	15	20	16	2	8	17	15	12	5	16	16	1
COBS02137	125	109	50	369	730	47	303	366	154	190	269	52	448	287	744	58	643	292	476	195	85	425	366	75
COBS02139	0	4	1	1	11	1	4	4	0	1	0	0	14	6	8	1	18	10	18	2	0	11	14	1
COBS02140	204	261	186	53	138	56	114	121	322	181	98	335	270	103	131	374	256	572	114	196	289	398	272	411
COBS02141	228	1224	728	798	1298	257	1319	1054	1188	1143	1261	1114	3039	1332	2084	1045	3108	3852	1693	1365	1513	3318	2119	1752
COBS02142	0	472	225	232	297	142	424	382	567	392	315	207	417	195	218	180	415	832	267	254	260	544	369	180
COBS02143	3516	30907	4513	3584	3367	2402	5431	4228	15558	7072	4872	13805	12285	5490	4135	16786	14641	12843	6404	14655	18211	20206	10001	16723
COBS02144	1109	353	1879	3	43	877	37	22	161	470	16	122	143	63	188	51	47	16974	231	128	92	230	2438	751
COBS02145	478	90	195	11	4	164	0	3	24	73	1	21	31	20	55	6	17	1945	51	34	19	61	484	119
COBS02146	1948	5520	2083	2437	2972	1215	3315	3066	3559	3525	2894	3280	6738	3335	3873	2959	6245	9218	4625	3789	3879	6483	5782	3727
COBS02147	2	167	42	93	769	38	50	80	652	86	18	120	1242	106	1956	203	1407	200	232	435	558	1962	196	474
COBS02148	0	24	13	17	123	1	14	12	131	19	7	17	91	9	174	19	111	19	29	43	48	166	21	39
COBS02149	4571	6179	3193	7697	9129	2142	6991	7438	4114	7066	7774	3818	17047	7232	11631	4166	17041	15609	11720	6432	4655	17144	12415	4844
COBS02150	0	2	4	1	12	0	12	0	0	8	0	0	1	0	4	1	2	1	0	0	0	1	0	0
COBS02151	225	1201	313	1618	442	263	393	437	636	487	256	373	677	459	371	237	494	879	254	261	330	647	438	320
COBS02152	2	343	91	216	185	82	213	178	237	282	218	140	1030	313	388	167	670	889	444	307	160	1045	495	207
COBS02153	0	15	10	9	12	6	25	9	196	17	15	4	72	5	45	0	10	23	11	15	6	217	21	3
COBS02154	0	685	301	311	477	138	507	451	729	577	303	403	670	320	456	545	704	841	379	395	558	1080	762	628
COBS02155	1581	1579	788	1090	1119	427	1501	1308	1676	1470	1108	1189	2017	1079	920	1420	2075	2463	1379	1018	1322	2146	1642	1214
COBS02156	0	41	52	124	51	21	297	221	77	148	113	17	73	127	69	21	117	188	170	30	37	86	205	30
COBS02157	0	92	18	15	72	3	40	37	37	59	22	23	49	27	14	18	46	34	22	22	45	55	34	34
COBS02158	845	3549	1104	1145	1188	572	2261	2245	2216	2166	2061	2546	3852	2498	1584	2699	3916	5121	2855	2030	2026	3954	3249	2661
COBS02159	12	473	163	175	303	72	370	328	238	482	489	211	332	216	172	260	334	418	253	179	163	454	301	156
COBS02160	1854	804	1197	1020	2654	481	1667	1666	8543	1938	962	477	6752	1271	2444	339	6710	2464	1560	696	848	7184	1572	816
COBS02161	0	275	121	167	183	96	142	157	237	199	192	224	478	282	532	275	600	1158	433	397	352	638	654	415
COBS02162	1270	3692	1452	1454	2083	655	2066	1514	6487	1727	2212	1087	3490	1382	1842	1472	3822	2508	1825	1157	1692	4417	1913	1996
COBS02163	145	300	135	1386	2358	117	913	775	1091	656	1093	142	1684	1122	1754	121	2119	353	1725	332	273	1511	747	208
COBS02164	0	0	6	83	83	7	35	23	0	19	7	2	22	34	98	5	39	23	41	15	4	20	58	4
COBS02165	0	0	0	33	47	0	28	23	0	11	19	8	13	19	35	5	22	17	21	1	7	13	19	1
COBS02166	0	0	4	10	52	2	8	6	0	7	0	3	22	41	83	4	37	35	46	16	7	22	51	1
COBS02169	0	0	6	2	3	9	19	18	0	8	1	2	0	0	6	2	6	35	4	3	0	3	28	0
COBS02170	285	181	261	766	995	235	633	617	1158	816	816	136	1716	400	2079	151	1503	1170	915	279	216	1813	1492	221
COBS02172	86	7	24	37	161	22	50	58	0	35	59	6	9	20	62	3	30	15	29	7	2	11	26	2
COBS02179	55	1413	541	557	3371	296	159	169	3995	505	223	711	8682	707	8299	1131	7755	3406	649	2516	3004	9857	1024	2300
COBS02180	616	335	216	835	1535	113	821	786	465	671	894	374	1841	914	2012	295	2190	1211	1511	757	518	2004	1450	431
COBS02183	0	0	1	14	29	0	22	35	0	16	3	2	3	0	14	2	4	10	12	11	2	2	5	7
COBS02184	0	10	30	88	197	31	81	65	46	85	95	29	49	51	175	14	73	83	108	56	19	60	103	13
COBS02188	1295	996	459	1272	524	296	2232	1703	1758	1931	881	526	1841	2336	521	581	2243	2757	2898	577	2756	1986	3848	1097
COBS02189	124	440	283	269	526	145	563	510	1214	587	438	431	1391	474	676	361	1437	1119	603	458	653	1872	702	546
COBS02190	176	161	167	147	150	51	225	169	163	251	174	141	421	132	219	163	440	789	184	177	261	407	272	309
COBS02191	1082	1559	673	1828	29	496	2765	1728	187	2356	1507	1711	153	1971	162	4039	319	7534	2756	2012	2717	302	8406	2629
COBS02192	1	42	49	18	24	19	18	23	86	69	41	32	17	43	28	56	15	215	37	76	85	26	115	53
COBS02193	338	153	88	148	54	76	167	210	34	307	214	95	187	499	201	175	269	955	618	292	233	241	1092	120
COBS02194	512	330	364	316	597	229	570	522	1007	449	321	267	1091	318	1280	258	1278	1618	443	477	516	1788	824	520
COBS02195	13	135	86	132	187	47	184	223	39	200	161	392	1015	616	483	437	988	1178	669	455	443	1186	808	460
COBS02196	2981	5266	2249	1633	3005	908	2803	2803	5889	3187	2838	2063	5717	2539	2548	2519	6101	6286	2943	2950	3009	6781	2937	2933
COBS02197	200	753	525	340	751	155	792	738	1726	692	705	415	1082	439	580	403	1178	1392	590	467	585	1353	617	512
COBS02198	4852	3737	1744	6575	2036	1469	7580	8355	1728	8521	8687	2467	4903	5885	3612	3103	5253	8170	8812	3225	3377	4988	13573	2936
COBS02199	3186	1780	1539	2186	1512	681	3553	2887	2134	2811	3067	437	1806	1456	1321	893	2209	3302	2646	1053	988	2253	2901	1035
COBS02200	2060	2966	1335	741	791	780	1099	883	1502	1490	946	996	1306	742	556	910	1214	3913	1086	869	1071	1298	1753	1581
COBS02201	84	337	213	114	274	134	248	243	544	240	277	376	1048	455	444	356	1126	1323	458	378	503	1446	553	526
COBS02202	697	367	237	368	530	164	342	401	523	447	469	266	726	484	629	251	988	1538	754	454	351	901	901	314
COBS02203	1706	1507	1717	475	980	978	742	800	997	1822	587	1224	2376	1018	1416	899	2093	11087	1321	1544	1424	2410	3701	1469
COBS02204	0	571	423	345	356	95	1198	820	874	1908	714	351	545	474	259	449	456	627	713	263	374	583	1344	488
COBS02205	0	51	46	380	192	58	305	290	182	238	537	39	330	517	298	41	473	189	597	93	61	332	390	88
COBS02206	0	8	8	28	36	7	53	40	0	9	30	2	14	23	28	2	22	24	50	8	3	15	35	8
COBS02207	967	130	485	21	35	159	31	22	0	99	27	9	23	17	28	2	8	1588	23	20	7	10	292	63
COBS02208	0	10	3	14	9	6	34	34	1	25	20	1	4	17	5	0	8	15	26	0	0	7	25	0
COBS02209	251	117	46	33	69	34	75	50	92	92	60	255	233	106	155	130	357	526	111	297	211	324	176	280
COBS02210	113	363	190	1377	2322	176	952	898	418	741	1250	234	2123	1543	1976	224	3137	1119	2362	519	383	2101	1403	297
COBS02211	0	58	32	134	226	40	197	79	80	115	142	35	105	81	122	11	142	93	188	90	27	87	102	20
COBS02212	3255	1130	1595	2205	223	876	3549	3475	1175	3534	3318	544	794	1569	842	590	794	3083	2995	828	726	740	5474	737
COBS02213	742	1025	814	708	1027	402	1040	858	1141	1590	904	886	2820	1255	1312	732	2810	4939	1592	997	1059	3245	2367	1254
COBS02214	0	133	77	65	146	44	82	99	77	115	60	69	217	79	98	68	201	232	98	81	85	233	124	72
COBS02215	14	572	424	323	267	239	431	348	429	759	328	268	586	332	356	357	517	1282	338	314	481	684	570	538
COBS02216	267	557	138	257	314	80	412	398	269	608	457	610	1308	854	864	682	1380	1869	1160	772	1052	1441	2156	552
COBS02217	4212	8148	4021	3156	4679	1681	5938	5578	6379	6113	5074	3972	5980	3294	4538	3036	6681	12429	4530	4747	4058	6788	5750	3446
COBS02218	675	555	404	350	398	237	426	435	950	530	452	455	933	589	799	399	1131	1739	644	656	704	1387	1140	877
COBS02220	0	2	0	11	6	5	6	2	4	3	2	0	3	1	1	0	4	1	0	2	0	4	0	0
COBS02221	3	249	144	2161	3669	149	1442	1595	2020	750	1854	317	2970	1388	5734	538	3815	800	2248	1609	1385	3735	1352	990
COBS02222	221	0	10	108	292	4	88	60	178	55	148	11	45	20	226	13	63	34	43	47	39	78	33	26
COBS02223	0	1	0	143	121	9	8	49	17	14	13	12	41	25	318	18	69	37	53	51	47	69	54	27
COBS02224	0	1	0	72	87	11	9	27	0	0	23	4	15	7	87	5	25	18	17	13	17	28	19	2
COBS02225	0	0	0	7	28	0	10	6	0	18	14	4	12	6	113	11	23	12	10	19	13	27	21	3
COBS02227	0	0	15	3	6	0	5	0	0	5	9	0	0	2	0	2	0	7	0	2	0	0	3	0
COBS02230	0	0	2	68	131	0	30	24	47	20	25	13	33	31	162	13	37	27	53	30	24	36	23	30
COBS02233	0	0	0	13	1	0	1	0	0	4	0	0	0	1	3	0	0	7	1	1	1	3	2	1
COBS02237	0	363	291	18	35	114	49	28	22	23	34	29	5	19	13	32	6	1419	35	40	33	12	283	130
COBS02238	1712	2739	2337	6120	7029	1361	8376	7709	4530	7199	9973	1664	5952	6582	4436	1390	7322	7101	8806	2172	1609	4856	6162	1673
COBS02239	0	0	2	4	1	0	12	0	0	3	1	1	3	1	3	5	1	2	7	0	1	2	6	0
COBS02240	0	70	42	187	140	28	214	154	45	155	226	61	563	575	543	81	707	684	967	195	127	516	801	160
COBS02241	1	643	301	357	456	168	519	517	382	489	464	291	633	315	351	259	707	891	419	293	353	861	553	389
COBS02242	3	401	346	342	498	140	501	334	374	344	504	447	1456	822	753	553	1455	1893	838	585	664	1745	915	685
COBS02243	0	191	85	68	96	37	96	75	140	87	67	84	247	106	131	90	265	362	109	99	150	327	137	150
COBS02244	3	303	169	171	180	109	150	132	212	152	92	343	1409	4555	617	153	354	613	193	155	231	431	253	261
COBS02245	1443	901	971	303	684	488	470	418	1046	858	372	723	1047	283	1248	681	977	4469	323	1023	1158	1545	1310	1250
COBS02246	1079	2023	847	564	884	422	971	664	1314	1040	863	763	1374	560	667	586	1347	2396	743	748	871	1553	878	1011
COBS02247	145	1754	231	667	195	115	1186	866	173	828	577	1086	597	936	261	913	604	984	1203	665	928	389	1266	877
COBS02248	240	2678	418	428	394	229	629	620	348	894	457	2152	1371	934	600	4301	1355	1744	977	1795	4002	1385	1348	4737
COBS02249	30	205	339	153	430	204	66	137	275	286	100	150	532	507	229	87	652	1499	527	163	113	510	459	146
COBS02250	250	520	517	584	847	306	846	675	890	741	711	482	758	363	800	359	1073	1588	466	707	474	921	583	556
COBS02251	2845	2783	1346	3559	1319	567	2295	2018	4063	2736	2081	1719	2868	3400	2617	1346	2582	3657	2184	1484	1586	2937	2271	1542
COBS02252	210	288	65	246	117	46	274	252	204	263	175	132	373	301	451	164	391	514	330	223	236	484	372	311
COBS02253	2180	4225	2809	6366	995	2261	8965	9524	1869	9486	6900	6385	11169	17558	3701	9687	13212	30190	16298	6971	10618	10331	30052	14539
COBS02254	1959	3118	1868	3391	4072	904	5023	4715	3892	4522	4979	1544	6046	3823	3581	1697	6223	6073	5170	2354	2255	6326	5542	2362
COBS02256	862	1142	641	1161	1760	367	1368	1293	1824	1541	1681	855	3003	1674	2183	686	3386	2624	2220	1275	1184	3143	2123	1076
COBS02257	1	202	387	565	1081	380	186	245	411	482	365	273	4810	929	4018	391	4288	3660	1771	813	654	5241	2263	612
COBS02258	0	0	0	21	30	0	9	6	0	10	7	2	36	8	30	3	23	21	12	4	7	28	18	6
COBS02259	0	14	18	44	107	9	17	20	0	43	15	15	130	40	165	9	89	106	63	24	21	84	63	10
COBS02260	0	0	0	1	2	0	0	0	0	0	14	4	0	0	0	0	0	1	3	3	0	0	7	0
COBS02262	0	2	2	56	162	52	36	33	9	72	31	16	104	39	271	19	120	153	78	34	30	135	119	13
COBS02263	0	0	9	12	1	0	4	0	0	4	0	0	0	1	0	0	1	2	2	2	0	0	1	0
COBS02264	7383	6968	4173	4778	8043	2011	6825	6090	9217	6947	6990	2913	6847	3407	6654	2599	7185	10776	4440	4623	3758	7736	5770	4082
COBS02265	1	26	6	15	15	4	20	17	0	14	41	3	22	19	11	2	17	2	21	3	2	19	12	2
COBS02266	975	906	735	1547	2910	410	2456	2232	2417	1804	2849	309	2564	1767	1503	376	3463	1701	2264	667	663	3053	1371	529
COBS02267	0	32	22	29	97	4	48	45	61	24	36	29	280	157	182	32	333	122	234	83	54	343	170	45
COBS02268	812	1364	911	951	1615	503	1225	1015	3634	1396	1101	723	1890	709	1471	555	1907	2634	908	1006	1005	2629	1200	706
COBS02269	0	13	2	11	5	1	5	20	0	3	4	1	23	11	24	2	24	13	36	9	10	30	16	4
COBS02270	0	31	11	11	17	14	50	35	22	35	6	90	154	83	68	87	152	173	121	72	70	223	194	88
COBS02271	190	200	81	140	98	69	215	123	56	250	117	263	426	232	116	240	402	401	347	187	211	490	461	215
COBS02272	5626	5953	3872	5882	7108	2249	5325	5133	9553	6648	6152	3560	10195	7266	8083	2491	9864	16636	6845	4143	3933	10820	8949	3828
COBS02273	2	487	263	229	343	112	458	409	461	464	478	517	1056	569	632	585	1215	1552	698	741	704	1279	906	695
COBS02274	26	188	188	83	182	21	264	278	329	245	134	106	200	89	68	108	147	225	118	67	111	211	115	87
COBS02275	711	553	583	1497	800	365	1142	1016	323	1451	1629	303	1674	1428	1329	352	1846	2478	2412	714	412	1332	2831	393
COBS02276	319	1009	435	407	503	193	853	818	1089	748	668	1068	1391	880	915	1133	1560	2083	1053	981	1246	1825	1423	1154
COBS02277	0	408	240	172	288	139	214	222	594	309	241	376	828	271	423	364	815	1264	266	474	634	1136	546	708
COBS02278	929	2607	1232	1533	2455	563	2389	2138	3799	1890	2248	1304	3575	1931	2687	1367	3433	3503	2299	2021	1572	3894	2369	1547
COBS02280	197	8371	116	277	302	82	526	618	1260	328	411	3455	2508	2076	570	11010	2266	1080	1305	6013	12683	2053	1492	5138
COBS02283	0	0	2	0	1	3	1	1	0	19	0	2	1	1	1	0	0	11	0	0	0	1	2	1
COBS02284	1	0	5	13	4	0	0	1	0	3	0	0	2	2	0	0	0	1	0	0	0	0	1	0
COBS02285	0	2	34	15	6	4	4	0	0	16	0	2	11	1	7	1	6	39	3	8	0	9	18	0
COBS02286	0	0	30	0	3	25	0	0	96	47	0	1	2	0	26	1	2	78	6	4	2	6	20	1
COBS02287	0	50	27	159	345	5	98	148	56	33	84	34	255	155	319	32	388	50	188	76	59	330	96	55
COBS02288	1	0	1	48	92	3	28	21	1	10	24	4	24	33	68	1	37	15	57	13	9	15	34	7
COBS02289	0	2	0	0	1	0	0	4	0	11	0	0	1	0	2	0	0	6	0	0	1	0	5	0
COBS02290	0	5	3	31	148	2	27	38	0	18	84	4	32	38	85	3	54	14	47	15	4	20	24	1
COBS02291	0	2	3	0	7	0	6	13	0	2	11	0	1	1	1	1	0	0	3	0	0	0	1	0
COBS02292	0	111	19	14	55	15	43	10	37	48	22	86	152	53	94	72	160	164	78	97	87	168	121	88
COBS02293	279	238	113	113	145	43	183	232	595	195	133	156	383	144	306	160	354	735	190	174	259	626	319	230
COBS02294	0	17	17	47	14	7	21	13	47	34	49	0	18	0	9	0	24	14	13	0	0	8	19	0
COBS02296	0	0	0	3	8	0	3	5	1	3	12	0	1	1	1	0	2	6	0	0	0	1	2	0
COBS02297	0	2	5	16	14	0	18	17	1	12	27	5	14	9	13	2	28	28	7	0	0	16	8	4
COBS02298	1	0	3	4	6	3	5	20	2	9	27	2	7	3	4	0	5	14	6	0	0	4	7	0
COBS02299	0	1	1	17	13	3	31	7	0	9	0	0	11	6	8	0	15	10	8	0	0	4	5	0
COBS02300	0	2	1	23	15	0	9	10	0	5	3	0	9	11	8	0	26	13	15	0	0	10	5	1
COBS02301	2	0	1	16	3	4	14	3	0	0	1	1	3	9	4	1	7	16	4	12	1	2	9	0
COBS02302	0	1	0	8	13	6	19	4	0	11	8	56	7	3	6	13	11	12	8	386	0	6	37	2
COBS02305	2451	2768	1500	341	907	998	448	503	3099	772	280	1798	1734	400	2109	1475	1941	6652	494	2991	2668	3028	2149	2801
COBS02306	0	4	0	7	3	0	0	1	0	16	0	1	3	2	11	0	7	6	9	4	2	6	11	1
COBS02307	243	594	400	144	283	265	361	267	523	295	174	420	679	369	318	396	693	654	383	446	491	783	452	471
COBS02308	179	1040	552	831	702	274	1545	1325	1010	1405	1376	730	913	990	677	672	1311	2121	1197	767	917	1076	1953	778
COBS02309	2232	5999	1916	3103	5222	1265	4108	3415	4204	4169	4348	3437	9901	4655	6447	3878	10135	8321	5652	4667	5008	10127	6587	4358
COBS02310	20	17	1	14	6	5	15	6	8	29	9	6	21	10	15	2	18	30	30	16	5	18	28	6
COBS02311	0	254	84	188	96	46	367	336	160	895	318	969	1910	1756	679	1288	1616	1611	2225	746	1191	1780	4563	1394
COBS02312	0	1	5	25	10	3	24	4	20	17	12	8	13	8	22	2	18	32	16	17	9	17	13	4
COBS02313	0	83	109	180	148	108	248	324	242	466	245	63	430	338	174	71	542	632	502	92	61	486	606	88
COBS02314	0	0	2	4	13	1	0	8	0	6	1	5	14	10	26	9	23	57	20	13	8	31	31	5
COBS02315	5819	3750	2180	2708	1269	1163	3942	4270	2797	9070	3315	1486	4549	2286	2110	2959	3219	8930	3521	3156	2614	5858	10078	5184
COBS02316	0	29	56	117	947	35	130	147	608	147	83	35	3704	97	669	21	1473	173	170	40	50	3043	213	33
COBS02317	185	4634	111	284	334	90	202	220	935	339	222	1146	6585	337	1794	2649	4459	497	310	2349	3773	7536	582	2177
COBS02318	7689	16302	5455	11076	29202	2918	19909	15092	16214	25291	24966	6676	30334	21882	6460	10390	35599	10724	31165	6130	7352	33677	29714	6558
COBS02319	1	1703	501	503	683	276	876	832	826	768	720	1070	1549	848	603	1704	1585	2278	1082	852	1775	1758	1182	2253
COBS02320	0	216	98	181	255	50	231	321	340	137	192	105	631	288	288	130	720	457	340	208	171	896	315	137
COBS02321	720	842	884	677	807	392	1546	1489	2955	1676	1431	606	2598	1140	1219	599	2083	2520	1694	577	804	2972	1891	773
COBS02322	3638	5080	3893	2936	5847	2266	4065	3829	7524	4737	3915	5656	11417	4948	13208	5018	13376	23205	6507	8779	7929	13144	10819	8452
COBS02323	0	2	0	17	5	4	0	0	0	0	0	2	5	1	6	6	3	0	2	5	9	3	3	2
COBS02324	1302	4552	1900	1955	2378	1122	2902	2594	3010	3247	2759	2965	6368	3005	3276	3649	6094	9253	3669	2846	4151	6863	5384	5475
COBS02325	0	215	12	12	145	3	3	0	1779	1	0	250	47	31	1409	135	1166	15	18	113	148	421	5	117
COBS02326	76	176	80	76	83	44	183	175	171	158	167	277	399	242	176	417	397	774	210	203	434	630	443	620
COBS02328	0	0	10	8	11	0	0	1	0	1	4	5	91	17	87	5	32	38	21	7	4	62	21	11
COBS02331	277	206	159	881	251	79	958	718	555	721	1043	112	202	740	425	94	370	410	1257	236	149	295	704	127
COBS02332	1	68	98	237	318	60	588	513	2401	397	533	36	695	628	2481	35	1821	406	1117	62	47	1070	1129	38
COBS02333	0	46	114	13	92	56	32	2	386	22	0	63	542	3	170	43	556	1102	30	39	28	976	152	69
COBS02334	0	1	101	0	145	39	4	15	22	2	2	26	1459	47	90	13	693	994	251	15	15	651	316	19
COBS02335	1	1	119	13	29	51	0	0	2	38	0	2	43	6	4	2	51	1705	8	1	0	25	342	1
COBS02336	0	94	40	407	796	38	534	476	292	207	558	234	1267	646	574	127	3460	309	1006	357	158	1530	463	189
COBS02337	229	443	155	113	948	58	181	113	250	100	43	354	391	67	173	245	1733	688	94	191	179	336	344	416
COBS02338	0	362	110	40	126	46	125	128	487	164	48	418	389	138	337	386	415	864	149	482	488	529	356	375
COBS02339	0	314	173	316	221	117	567	493	210	857	525	573	1079	839	341	747	954	1188	1201	348	575	1306	2599	659
COBS02340	746	307	598	660	500	399	906	933	1904	761	747	176	971	1094	825	128	2305	3728	1740	186	217	1114	1737	402
COBS02341	3018	584	1078	546	438	555	705	436	863	468	336	336	555	233	468	325	633	3329	452	357	344	979	1348	397
COBS02342	722	794	1077	513	497	641	701	591	229	725	528	827	1916	726	1143	671	1917	10513	1091	1035	1036	2151	2865	1072
COBS02343	5095	3974	2612	2746	4819	1196	3721	3496	7565	5160	3311	2040	5736	2641	4216	1832	5974	7989	4061	2967	3007	5974	5035	2862
COBS02344	256	1935	211	273	304	125	539	530	920	620	568	1057	1746	574	469	1277	1109	1181	683	1041	1207	1806	1015	1120
COBS02345	421	717	582	563	844	269	798	720	1035	1053	879	527	1329	677	914	570	1474	2303	891	586	637	1458	1099	743
COBS02346	6048	2019	3151	1033	982	2122	1221	1320	1758	1752	1010	1127	3559	1983	1559	1339	2127	15835	1619	1536	1162	4116	5973	1615
COBS02347	0	10	11	4	10	5	2	2	0	10	0	3	7	4	27	2	5	31	12	3	4	16	20	2
COBS02348	270	330	179	260	298	139	320	337	83	485	433	408	1145	575	531	542	1116	1999	709	516	490	1509	1050	533
COBS02349	653	586	428	122	165	246	169	236	431	310	94	871	1256	501	809	1033	1291	6949	539	1021	1228	1775	2278	1628
COBS02350	621	4051	676	515	141	439	626	801	120	799	439	1579	163	331	165	2220	220	1278	352	1159	1918	225	756	1733
COBS02351	0	318	197	541	651	101	913	700	833	748	967	99	595	434	316	115	714	321	554	157	125	601	363	138
COBS02352	0	188	100	78	81	39	149	147	116	166	82	386	469	261	206	446	515	682	326	259	382	604	447	447
COBS02353	439	1223	195	1317	24	144	18	14	107	39	0	8304	12430	45458	3981	20	61	169	40	45	35	117	59	17
COBS02354	1235	1674	1128	1342	3286	677	1717	1701	3880	1590	1543	881	4888	1450	4037	1040	4888	5148	1759	2073	1938	6043	2546	1630
COBS02355	0	405	72	275	259	52	306	230	241	242	134	355	850	451	500	537	895	550	541	534	832	1023	668	670
COBS02356	2668	2931	2175	1954	6553	513	6109	5464	8072	5815	6592	539	2216	1104	2143	605	2521	1870	1611	849	844	2617	1599	694
COBS02357	20258	6816	3140	9816	397	1016	592	574	544	1058	449	9208	10813	46104	2990	532	1005	6781	745	627	580	1195	1717	1075
COBS02359	1172	6499	815	373	244	389	725	584	675	843	475	4611	1052	524	297	9795	1194	3865	523	5142	9942	1540	1413	12469
COBS02360	791	144	312	12	149	210	42	61	23	93	23	137	94	99	26	205	128	4932	88	57	180	141	1209	250
COBS02361	427	441	246	226	371	181	275	361	596	306	337	339	998	382	423	301	1082	1213	415	320	441	1268	545	449
COBS02362	224	210	161	77	149	105	66	105	216	219	59	234	414	102	374	222	389	1046	135	300	314	529	348	311
COBS02363	1301	624	535	308	527	166	708	652	1133	829	657	367	603	292	364	364	737	1246	344	307	406	864	570	414
COBS02364	480	2379	215	177	369	73	362	260	1265	734	243	812	573	209	469	2207	535	533	314	1694	4287	873	707	3408
COBS02365	0	14	0	7	7	0	0	1	0	3	3	7	13	1	14	16	9	12	13	16	51	17	3	44
COBS02366	2496	4924	2574	2073	6138	1331	3143	2937	7432	3662	2803	2544	12189	2485	5231	2060	9483	6188	3354	3471	2839	13306	3641	2937
COBS02367	0	4	5	6	9	11	11	12	13	5	22	0	2	4	6	0	3	2	2	0	1	9	0	0
COBS02368	0	22	3	53	46	28	15	29	0	33	41	33	95	43	169	39	109	70	67	70	45	119	97	51
COBS02369	5089	6423	4507	4381	7691	2631	5599	5641	5318	6293	5455	3542	12406	4554	9365	4172	11628	19801	7467	6010	5913	12895	10355	5094
COBS02370	1428	2532	1116	1720	1762	584	2438	2393	2383	2814	2808	1485	3256	2993	2258	1977	3885	3968	3779	1941	2282	3527	4398	2457
COBS02371	6806	6654	3952	3400	7097	1846	5586	5183	8427	6066	5050	2804	7559	3716	5783	2641	7797	11874	4623	4524	3911	8290	5969	3802
COBS02372	727	7255	1977	1747	2180	1284	2839	2810	4220	3213	2647	7900	15848	4834	6072	16208	12982	14729	5745	6771	17155	18875	10480	21045
COBS02373	2503	9610	2879	3677	4177	1691	4921	4283	8144	5344	4172	5774	8987	4264	5383	6886	9785	9676	5555	5892	7389	11350	8108	6738
COBS02374	588	4172	950	919	1098	481	1583	1708	1970	1913	1461	2867	4668	2292	1872	3462	4467	4806	2815	3300	4256	5618	3631	3704
COBS02375	6006	527	4711	26	19	2240	10	9	1042	1928	1	81	67	153	509	5	11	19282	96	72	46	684	4719	479
COBS02376	1384	3219	1500	1409	1459	727	2185	2241	3235	2373	1599	2990	5258	2786	2837	3520	5376	8111	3369	2971	3844	7531	5305	4783
COBS02377	189	1598	832	528	1192	556	865	661	2210	1215	876	1491	2259	760	1508	1349	2585	3684	897	1328	2007	3356	1606	2476
COBS02378	325	632	132	137	30	99	169	229	455	170	99	278	623	379	50	1057	556	935	434	988	3437	651	522	1854
COBS02379	212	589	299	382	129	118	743	603	267	1030	669	355	223	264	128	438	175	645	328	318	523	239	771	431
COBS02380	868	655	610	2201	1222	443	2140	1681	1131	2308	2636	266	2306	2580	1596	355	2219	1736	3514	659	576	2430	2876	406
COBS02382	920	125	294	111	69	187	114	99	993	326	131	50	371	185	526	39	276	1647	236	98	73	1013	710	101
COBS02383	6632	12747	4210	6741	1986	2290	10397	7799	2750	26129	10910	6014	4843	5120	2122	6809	4051	8076	8378	4409	6430	3975	27187	9001
COBS02384	1	58	16	0	2	14	4	13	2036	18	0	7	1	1	160	3	1	14	4	14	34	417	13	11
COBS02385	775	1952	500	1393	822	388	1164	1430	995	1104	979	1164	3007	2370	1830	2530	3170	3626	3631	1314	1304	3132	3566	2094
COBS02386	228	401	96	138	153	40	160	229	299	312	185	532	894	337	455	449	841	677	422	456	476	1068	587	628
COBS02387	8	5756	647	724	69	311	1015	1448	101	1572	890	4103	392	1121	221	9138	383	3692	839	4954	11030	521	2262	8545
COBS02388	717	750	390	470	686	164	940	1009	1842	1034	977	416	1361	689	573	411	1359	982	782	515	587	1680	812	526
COBS02389	0	104	46	72	101	11	98	108	383	142	84	32	86	69	83	34	113	64	77	61	41	117	87	43
COBS02390	4073	9335	2760	4292	2667	1570	5702	5102	3285	6994	5153	5095	5782	4901	4268	8360	5988	12626	6653	5867	5892	6825	11782	6715
COBS02391	0	31	5	17	15	1	8	0	0	12	0	0	4	9	4	2	0	3	7	4	2	1	8	4
COBS02392	0	184	46	91	91	49	151	75	182	168	107	168	254	149	120	145	278	336	222	154	142	320	225	239
COBS02393	478	165	290	514	1139	272	466	524	238	509	453	322	825	452	1716	274	1008	1874	728	686	453	978	1076	461
COBS02395	146	52	39	23	47	17	63	42	53	21	44	41	137	78	106	54	145	311	134	62	64	202	264	79
COBS02396	9591	6886	5814	5276	4454	3387	6149	8269	8309	4153	3003	3837	18596	8500	6050	5774	22678	25427	13396	5153	9542	21930	24213	8843
COBS02397	2867	2009	1918	2202	4082	1158	2192	1845	2829	2289	2658	751	4455	2319	3223	711	4898	7394	3058	1658	1275	4375	3336	1237
COBS02398	0	0	0	9	6	2	2	2	35	0	2	1	8	7	12	2	12	13	15	11	4	22	5	4
COBS02399	2775	3392	1874	912	1195	842	1545	1402	2829	2247	1072	1684	3335	1504	1596	1816	3170	6870	1866	1723	2390	3722	3195	3208
COBS02400	3292	3794	1735	2970	5414	942	3807	3310	7288	3646	3944	1285	5804	2790	5711	1512	6561	5261	4059	2515	2759	7135	4335	2462
COBS02401	566	672	111	214	239	118	352	371	184	416	273	302	419	363	174	558	811	690	548	384	696	482	416	324
COBS02402	3709	1352	1932	1256	1061	1076	1550	1563	860	2202	1365	1065	2050	1647	1275	1112	1875	12975	2432	1624	1656	2313	5620	1557
COBS02404	700	1245	692	250	360	367	433	321	478	618	379	631	603	265	298	635	653	1945	287	573	658	924	822	896
COBS02405	981	2017	803	677	989	286	732	656	1941	827	913	834	1294	680	1039	807	1576	3014	1164	858	1000	1632	1469	1102
COBS02407	1076	618	341	666	1087	190	693	699	2069	657	776	803	3047	1047	2349	741	3536	1909	1396	1274	1144	3912	1559	1006
COBS02408	153	109	97	295	281	75	388	297	215	366	210	146	468	272	399	99	549	518	475	200	167	547	580	103
COBS02409	1433	559	481	1168	473	331	2036	1926	1231	2492	2099	274	1155	1158	895	286	1068	1388	1770	440	409	1302	2919	331
COBS02410	948	5342	1522	2422	1029	1004	2634	3116	1659	2627	2198	4289	3657	4349	2699	7458	4359	10262	5737	5631	8635	4486	7985	7206
COBS02411	444	1248	549	545	568	249	813	567	1045	613	471	446	1138	552	559	426	1211	1427	605	693	640	1298	780	890
COBS02412	3221	3133	1838	418	1385	718	1092	938	6780	1650	710	3098	2144	606	2260	2761	2438	5726	721	3164	4644	3247	2126	4964
COBS02413	1	38	16	44	49	1	59	40	30	45	67	14	69	54	58	8	94	25	76	23	21	76	42	10
COBS02414	144	509	288	202	382	156	346	342	395	412	197	538	1438	604	610	476	1483	2650	791	670	695	1703	1056	882
COBS02415	3087	8727	2774	3804	4925	1626	4264	4503	6395	5396	4309	3933	6103	3215	5571	3744	6460	9036	4449	5464	5558	7711	6140	4573
COBS02416	1399	854	685	1108	1557	388	1563	1325	1880	1411	1574	284	1277	851	1454	301	1684	2210	1486	504	482	1539	1556	606
COBS02419	0	7	0	2	8	0	17	1	0	0	0	0	11	16	6	0	6	2	7	4	0	0	0	0
COBS02421	0	0	587	0	0	72	135	0	0	3	0	1	0	0	0	1	0	2	0	2	0	1	1	0
COBS02427	0	29	0	85	0	0	56	58	0	16	28	10	0	203	1	12	2	2	254	11	25	0	130	19
COBS02435	0	1	6	1	11	0	2	2	70	11	6	0	0	0	0	0	0	3	0	1	1	0	0	0
COBS02438	262	55	60	13	28	1	62	45	286	55	54	3	5	15	1	1	2	16	2	0	1	3	8	0
COBS02444	184	3	17	48	160	2	114	157	0	40	160	3	20	24	26	1	14	10	36	2	1	17	16	2
COBS02445	0	95	60	30	11	31	74	51	3	46	22	26	20	25	7	14	7	47	14	40	48	6	31	54
COBS02448	2445	2831	1422	1127	1371	521	2487	1899	4362	2710	2212	1429	2545	1403	1319	1704	2611	3415	1660	1495	2111	3151	2450	2069
COBS02449	9123	2447	3107	11287	1391	1465	22004	20105	2820	23442	29923	836	2903	8426	1863	796	2803	3237	12982	914	788	2163	18966	660
COBS02450	4143	6573	2536	6017	2592	1589	7344	6136	2933	5288	5579	3885	7202	8219	4798	4306	9943	14611	12704	5694	3923	7795	10704	4963
COBS02451	1059	1887	973	980	1924	413	1806	1706	1912	1684	1537	1156	2385	1165	1790	1316	2455	3523	1514	1316	1381	2413	1864	1232
COBS02452	493	388	9719	109	174	3424	2438	240	238	240	133	481	660	294	412	359	664	1068	448	500	508	994	643	589
COBS02453	0	172	1023	924	5574	1349	854	362	3773	785	1292	278	9245	3306	2628	137	9726	372	4187	661	343	9852	1068	217
COBS02454	1862	1417	1435	2402	2599	1059	2019	2077	1624	2294	2162	999	3720	2195	3679	933	4281	9244	3411	1914	1515	4396	5163	1540
COBS02455	148	782	356	355	391	221	407	336	518	581	271	866	1057	552	485	709	1006	1784	629	639	714	1260	944	1170
COBS02456	7259	6609	2828	2717	393	1335	6491	6456	3375	7257	4712	3889	3224	4866	413	5486	3239	6732	4518	1583	4028	3323	6612	4330
COBS02457	1	50	50	128	129	25	119	181	97	83	140	25	227	149	115	21	280	122	232	32	28	224	309	26
COBS02458	1	0	16	3	3	2	11	24	1	7	1	23	10	5	29	8	11	67	20	29	10	30	30	9
COBS02459	215	1102	442	491	719	263	911	836	1026	1126	698	877	2094	875	860	980	1850	1993	1096	904	1214	2535	1256	1099
COBS02460	2	1067	212	469	1014	118	529	531	962	617	634	574	1309	582	1395	930	1222	643	717	834	983	1816	787	1103
COBS02461	0	334	213	314	736	62	470	492	500	529	522	297	1483	573	929	253	1296	1141	739	494	497	1063	519	416
COBS02462	181	33	16	101	96	7	63	108	170	77	82	38	176	104	183	52	217	215	125	105	75	241	164	77
COBS02463	6905	4677	3687	6225	10411	2440	8265	7229	6945	7731	8601	2711	8231	4588	8170	2455	8423	11452	6412	4939	3839	7869	8044	3100
COBS02464	1	0	4	95	152	27	12	8	67	5	26	103	714	123	2329	73	861	137	283	28	41	2550	297	64
COBS02465	0	1	0	6	4	2	14	27	0	3	1	8	34	12	40	3	23	26	13	26	10	32	29	25
COBS02466	0	452	400	396	552	167	885	795	351	943	531	521	1264	706	749	442	1272	2060	806	717	856	1406	951	843
COBS02467	0	165	47	85	158	20	125	164	341	153	173	315	964	382	321	168	871	273	285	192	287	1147	197	1304
COBS02468	0	96	17	29	51	18	11	4	8	9	0	61	12	7	91	43	6	57	7	82	105	20	28	59
COBS02469	1	1195	223	712	4577	146	444	462	3599	662	579	900	18542	2306	5387	1165	13450	1096	3520	1749	1987	18737	1028	1924
COBS02470	6	36	3	34	1323	14	7	33	331	13	70	25	2860	94	382	25	815	6	116	20	6	3247	597	16
COBS02471	0	627	4	263	1149	3	27	5	166	10	5	9963	337	170	946	11858	1745	0	295	1611	2604	520	6	6444
COBS02472	0	0	12	6	5	0	0	0	0	1	0	0	3	0	5	1	4	15	8	0	0	3	17	3
COBS02473	145	56	542	1213	1313	335	3864	2142	666	4714	3917	35	559	2452	288	36	2612	285	5059	8	16	430	9960	14
COBS02474	0	3	10	49	703	89	61	58	324	77	69	7	104	68	29	8	922	8	204	2	0	107	161	1
COBS02475	0	20	4	20	25	0	27	1	0	19	25	11	75	50	12	5	157	3	61	7	4	46	13	1
COBS02476	0	5	17	42	2323	13	27	45	59	23	32	340	270	33	36	115	358	11	27	715	13	259	20	18
COBS02477	0	9	1	10	5417	6	1	0	90	0	5	5	1021	9	61	5	452	7	14	7	5	1303	3	11
COBS02478	2882	1205	1527	6370	15461	1035	6051	5579	15419	6864	6890	525	26564	8359	19737	850	23445	4308	11602	1961	2052	27469	8318	1644
COBS02479	89	7	7	0	14	6	7	0	4	5	0	2	6	4	22	2	5	38	5	6	4	9	18	1
COBS02480	185	6	3	51	254	5	24	43	0	54	42	8	95	64	266	1	146	16	83	8	14	101	49	7
COBS02481	0	0	3	25	156	7	6	28	0	10	18	1	106	72	307	1	137	18	129	24	11	136	65	17
COBS02482	0	0	8	50	124	1	28	42	0	26	39	1	107	59	234	3	130	8	83	15	13	108	36	4
COBS02483	0	83	81	113	158	23	121	224	111	157	146	123	483	250	287	104	546	624	327	164	176	560	373	142
COBS02484	1	372	185	138	203	92	204	163	194	226	212	432	318	177	189	366	354	620	286	326	302	413	298	390
COBS02485	1	81	52	142	185	11	239	180	528	143	196	54	240	118	258	24	263	111	178	58	62	475	94	70
COBS02486	0	245	162	512	589	78	596	650	352	518	775	176	1100	827	662	182	1348	589	994	315	202	1049	719	190
COBS02487	14	333	97	205	181	106	323	281	147	256	276	266	427	240	260	320	568	460	347	236	415	711	397	366
COBS02488	1472	2466	1987	1548	4320	1056	2110	1424	6069	2775	2186	1403	6567	1727	5125	1309	6300	6505	2243	2350	2072	7748	3463	2219
COBS02489	431	713	216	858	157	137	234	198	232	292	225	691	1236	1859	595	1146	997	1306	757	472	494	1426	947	1326
COBS02490	666	872	554	361	940	366	731	601	1755	734	475	812	1474	530	1152	779	1673	2901	585	824	930	2264	1198	1011
COBS02491	0	0	1	0	2	0	11	3	0	11	3	0	0	2	1	0	0	3	0	0	0	2	3	0
COBS02492	1	232	159	181	43	49	345	337	208	453	170	117	111	134	64	182	90	376	133	115	58	116	262	101
COBS02493	235	1522	570	913	257	328	1165	1221	254	1656	655	789	1082	1258	388	1392	808	3729	1291	820	592	729	2642	873
COBS02494	0	118	51	35	25	38	58	44	50	130	6	152	72	46	58	292	44	610	45	124	101	61	253	117
COBS02495	2919	4814	2414	2379	2419	1829	1320	1294	1075	1980	819	5369	1345	979	3397	5597	1413	13190	1916	7844	4285	2728	6082	5757
COBS02497	0	21	0	20	57	7	4	0	1	5	0	16	1	0	19	14	0	9	2	36	22	1	3	25
COBS02498	0	560	45	137	162	23	98	85	174	128	77	116	25	19	52	72	39	126	40	236	100	26	34	86
COBS02499	0	0	3	12	11	0	6	4	66	4	2	9	5	3	17	2	16	8	7	9	2	14	9	1
COBS02501	1834	852	669	243	560	254	446	334	1078	657	384	593	1190	1105	577	391	888	2296	454	638	517	982	749	687
COBS02502	268	678	611	1036	397	372	1599	1490	348	4506	1688	925	2158	2368	870	1198	2088	3683	3547	802	936	2103	11230	1221
COBS02503	2520	1638	1317	225	838	455	531	632	4305	864	443	1447	1106	302	1480	1055	1620	3095	339	1610	1666	1940	1085	1915
COBS02504	536	729	493	281	405	260	520	404	826	568	460	508	987	449	517	364	1084	1819	561	512	567	1263	816	701
[truncated: 14,296 more rows]
