# Supplementary material for: Metabolic plasticity supports a flexible nutritional symbiosis in Cardiocondyla ants
Source: Research Square preprint supplement (doi:10.21203/rs.3.rs-7898267/v1), 2025-11-10
Supplement: Supplementary file 6 [file Table-S5-STAR-Counts-vst-normalised.xlsx]

## Sheet: Table-S5-STAR-Counts-vst-normal
JP2011_1_31_L	JP2011_2_31_L	JP2011_6_31_L	JP2011_1_31_P	JP2011_2_31_P	JP2011_6_31_P	JP2011_1_31_W	JP2011_2_31_W	JP2011_6_31_W	JP2011_1_31_Q	JP2011_2_31_Q	JP2011_6_31_Q	JP2011_1_26_L	JP2011_2_26_L	JP2011_6_26_L	JP2011_1_26_P	JP2011_2_26_P	JP2011_6_26_P	JP2011_1_26_W	JP2011_2_26_W	JP2011_6_26_W	JP2011_1_26_Q	JP2011_2_26_Q	JP2011_6_26_Q
COBS00002	7.59494	8.10131	8.13047	8.34094	8.239	7.77381	8.26202	7.85995	7.79071	7.04878	7.09092	7.53539	8.32813	8.1028	8.33922	8.83918	8.79806	8.92298	8.45785	8.17626	7.71834	4.00157	7.12789	7.59363
COBS00003	10.1477	9.82364	10.1204	9.46213	9.83255	10.0784	9.42128	9.96045	9.90858	10.3365	9.9694	10.058	10.1511	9.98019	9.96812	9.96772	9.75379	9.86072	9.5749	9.50697	9.78477	10.7735	10.0407	9.24242
COBS00004	10.3957	9.87154	10.5219	8.63455	8.56931	9.87371	9.40684	9.55544	9.51181	9.48032	9.60915	9.85709	10.3277	10.9508	10.437	9.44246	9.39445	9.75477	9.71372	9.43026	9.78139	8.67337	9.50713	9.95127
COBS00005	8.18967	9.70722	9.69655	9.79508	8.49668	8.0055	8.426	8.72656	8.34457	8.03618	8.54742	8.62735	9.43611	9.83222	10.0106	9.58322	9.72035	9.72431	9.69775	9.66875	8.71039	8.18955	9.64739	9.82092
COBS00006	10.1228	10.1586	11.117	9.97094	8.95973	9.59611	10.6333	10.5097	10.6342	9.78197	10.0948	11.6749	10.9539	11.6675	10.6511	10.0501	9.97454	10.1216	10.9328	10.8665	10.6432	10.6664	10.1938	12.3731
COBS00007	7.78865	7.66488	7.89592	7.88453	7.71228	7.34737	7.9224	7.82341	7.73382	8.30531	8.53566	8.14412	7.45652	8.17283	7.44838	7.76127	7.87386	7.53288	7.92162	8.43749	7.66022	4.44244	9.54683	8.50362
COBS00008	6.34041	5.62952	5.6455	7.00962	6.12349	7.4242	5.77203	6.01534	5.29847	7.01119	7.73363	6.61841	5.34641	5.41553	5.78365	5.49188	5.53182	6.2469	5.44638	5.79884	5.48933	6.94741	7.51259	6.65746
COBS00009	8.30645	8.29117	8.81128	9.95729	10.1435	9.46885	9.94759	8.88511	10.2335	8.96417	9.06372	8.69522	8.52881	8.42306	8.55056	10.3852	10.8475	10.3113	10.9471	10.9001	7.72544	9.2994	9.54099	9.04456
COBS00010	7.14679	8.15981	8.35163	7.91064	7.27116	6.59172	7.23337	7.82341	7.03576	9.06257	8.6492	7.20082	8.14916	8.01229	8.45335	8.25257	8.35227	8.26502	8.08933	8.11614	7.43577	4.44244	7.68707	7.62542
COBS00011	4.94899	5.83242	5.53415	6.98994	7.45408	4.00157	7.43076	6.1038	7.35346	5.27975	5.77192	6.1687	5.46512	5.14504	5.53805	7.35728	7.69838	6.82187	7.62995	7.88091	6.71448	4.44244	5.08678	6.15341
COBS00013	4.00157	4.76009	4.83614	7.76933	8.8246	9.37795	7.63425	6.3906	6.97505	5.27975	5.47464	6.77327	5.05767	4.44343	4.9158	8.6948	10.1368	7.99043	9.28776	8.94955	6.31166	4.00157	5.6087	5.72324
COBS00014	4.80628	5.33666	4.9838	5.33168	6.05388	5.6672	11.3114	12.3762	11.0874	10.0991	9.86529	10.4974	5.05767	4.62407	4.8384	5.31168	5.4534	5.50451	10.3117	9.31408	12.7096	9.79193	10.8617	10.9677
COBS00016	4.51443	4.00157	4.65157	4.87236	4.51723	4.00157	4.83244	4.92207	4.00157	4.46639	5.47464	4.68136	4.00157	4.7611	4.00157	4.27229	4.58682	4.50244	4.51538	4.89054	5.23313	4.00157	5.15492	4.99739
COBS00020	4.00157	5.38358	4.00157	5.13009	4.72705	4.00157	4.42128	4.60994	4.00157	6.97256	6.72027	4.00157	4.87008	4.62407	4.53523	4.46911	4.37323	4.25294	5.55836	4.63505	4.63121	4.44244	4.52828	4.28283
COBS00021	8.86789	8.22151	7.7698	6.90833	7.23156	7.69567	6.60987	7.24559	7.1823	7.75039	6.84219	7.08862	7.89994	7.98657	8.07948	6.62967	6.95454	6.8027	6.67837	6.71297	6.6851	9.50505	6.93466	6.73576
COBS00023	7.84133	8.19379	7.59048	8.71947	9.02138	6.8281	8.71606	8.2836	9.09489	7.20649	7.27381	7.9079	7.35379	7.40805	7.79853	8.83739	9.40246	8.83783	9.5395	9.34401	8.22294	7.06755	7.43488	8.01592
COBS00024	9.48779	9.16809	9.22972	9.92577	10.2913	10.6377	10.2212	10.538	10.594	10.029	9.73265	10.3207	9.14339	9.14501	9.21594	9.68888	9.72765	9.7973	9.48884	9.69631	10.4045	8.78126	9.5267	9.39688
COBS00025	10.2555	10.115	10.2939	10.0326	8.98942	10.0948	9.22776	9.44604	9.59364	10.8701	10.9128	9.73358	9.86896	9.97802	10.3441	10.4374	10.1726	10.465	9.79935	9.80283	9.28222	11.4901	11.7436	10.8442
COBS00026	11.5002	11.3194	11.2864	10.3415	9.65882	11.2388	9.10068	9.68273	9.27687	11.4447	11.1098	10.4571	11.5431	11.2217	11.2987	9.88812	9.69824	10.143	9.07338	8.81513	9.65576	11.0517	11.3194	10.2922
COBS00027	8.04021	8.33241	8.33691	8.46567	8.60045	7.47561	7.97051	8.13777	7.65935	8.09952	7.18533	8.05819	8.28717	8.27539	8.46246	8.94409	9.01053	8.75222	8.52385	8.48575	8.08105	4.00157	8.03842	7.80655
COBS00028	8.16925	8.45882	8.07237	9.35256	9.67351	10.1339	7.94666	7.59658	7.23483	8.0454	8.23442	7.9079	8.43822	8.30339	8.44418	9.71632	9.79432	9.92364	7.74555	7.66801	7.82793	4.44244	8.57395	7.63884
COBS00029	11.9864	11.6545	11.7529	11.9021	11.6713	12.2994	12.9501	12.7283	13.4488	12.3145	12.218	12.9875	11.5964	12.0911	11.7918	12.1967	11.9845	11.9034	13.0411	13.1803	12.5606	12.8234	11.6766	12.5917
COBS00030	6.70373	4.00157	4.00157	4.00157	4.88559	4.00157	5.08996	5.54801	6.21646	4.00157	4.00157	5.76808	4.00157	4.44343	4.00157	4.00157	4.00157	4.25294	4.62923	4.63505	4.00157	4.00157	4.23816	4.28283
COBS00032	9.22703	8.76002	9.03413	8.45509	8.38036	8.4545	8.44877	7.9474	7.89813	9.12028	8.93538	8.71092	10.3527	8.99452	8.81162	8.74899	8.52163	8.39218	9.39731	8.13646	8.9313	9.6475	9.49768	8.45413
COBS00033	9.56972	10.0822	9.90835	9.88176	9.17394	9.58951	7.01928	6.98141	7.65168	9.96018	10.1498	8.07287	9.26419	9.38952	10.0698	8.09083	8.4011	8.74567	7.12983	7.58736	7.26035	11.0101	10.662	9.34901
COBS00034	4.00157	6.22989	5.74719	6.06315	5.66578	4.00157	4.59308	4.35454	4.00157	4.46639	5.22066	4.34381	5.80368	6.07922	6.16356	4.84678	5.09339	4.78773	4.80775	4.7744	4.00157	4.00157	4.96043	4.95972
COBS00035	7.35251	7.11815	7.25461	7.37723	7.62371	7.30733	7.63425	6.44123	6.83139	6.56582	7.55778	7.25374	6.50015	6.82086	7.17415	7.1463	7.28528	7.63618	7.36605	7.29925	6.8261	9.72666	7.049	7.2758
COBS00036	9.3633	8.42109	8.89393	8.54429	9.2762	10.5723	8.51501	9.21043	9.34698	9.67647	9.24066	9.22965	8.97336	8.9988	8.71966	8.92236	8.88227	8.96021	8.65478	8.44402	9.48106	9.90969	8.7937	8.28039
COBS00037	7.18836	7.7665	8.42766	7.38473	6.86669	6.37108	7.16557	7.36967	6.68647	7.0672	6.32938	7.59786	8.25919	8.49157	8.13761	7.99776	8.15753	8.14804	8.15857	7.90007	7.22047	4.44244	7.56324	8.22536
COBS00038	9.15115	8.92394	8.9465	9.06359	9.52746	9.30329	9.2952	9.8977	9.75169	9.66757	9.80295	9.84435	8.99891	8.76239	9.02024	9.13779	9.14065	9.21834	9.11408	9.31763	9.99808	4.00157	9.20949	9.22926
COBS00039	11.4372	11.5882	11.5901	10.9176	10.8645	10.9382	11.5122	11.3977	11.5275	11.0198	11.0939	11.2553	11.8813	12.0192	11.7244	10.8937	10.936	10.6615	11.3514	11.3165	11.579	11.6243	11.0623	11.1408
COBS00040	10.6063	10.291	10.2734	9.45861	9.52137	9.88857	9.63711	9.50273	9.36341	10.1382	10.0459	9.43625	10.5339	10.3043	10.148	9.55636	9.54971	9.6047	9.32521	9.39032	9.67778	9.76467	10.1691	9.51605
COBS00041	8.67893	9.61434	8.98157	9.22571	8.45042	8.07823	8.14127	9.3298	8.45397	10.9034	10.2358	8.79285	9.4516	8.82644	9.33221	8.9898	8.905	8.53393	9.14583	8.99467	8.67795	8.8058	9.5435	8.8914
COBS00042	8.09539	8.87947	9.1081	8.86233	8.38484	9.00649	7.78558	8.43219	8.41842	9.09393	9.00525	8.49212	8.86171	8.75735	9.00785	9.06035	8.95873	9.01703	8.51982	8.60412	8.54035	4.00157	9.6072	8.51573
COBS00043	9.54622	10.8967	11.0623	10.4439	9.8194	9.36642	9.21787	9.14312	9.31838	9.81458	10.1067	9.31628	10.8444	10.566	10.5544	10.6453	10.5983	10.706	10.0959	10.0048	9.19073	10.143	10.6203	10.3682
COBS00044	8.67532	9.4604	8.78985	9.28258	9.73084	8.30917	9.47211	9.20336	9.80762	9.37852	9.29745	9.11877	8.78542	7.64644	8.62142	9.75462	10.3922	9.50751	10.162	10.0004	7.31813	4.62267	10.5439	10.0335
COBS00045	7.95919	9.19345	9.0612	8.10847	6.99124	6.41819	7.40754	8.64545	8.38197	7.76164	7.6702	8.45529	9.0157	9.37642	9.57389	8.33849	8.27951	8.23256	9.0144	9.00574	8.52827	8.16696	8.32616	9.12257
COBS00046	10.5825	10.5506	10.4048	10.9329	12.004	10.1248	11.3199	10.7723	11.0195	10.7781	10.5567	10.5919	10.8135	10.7203	10.3685	11.2716	11.6773	10.9392	11.3972	11.5397	10.8028	8.82032	10.3899	10.3378
COBS00047	9.33157	9.84156	10.0636	9.16649	8.29722	7.73828	8.50418	8.52208	8.73961	8.81079	8.71326	8.65359	10.1718	10.3026	10.0091	9.67896	9.59729	9.85693	9.55927	9.50853	8.89415	4.00157	9.77733	9.59111
COBS00048	4.80628	5.18159	5.22022	5.36762	5.66578	4.00157	5.95491	5.84395	4.96746	4.91966	4.00157	5.53709	4.87008	4.87534	5.11245	5.09319	5.22814	5.45011	5.55836	5.79884	4.63121	4.00157	4.87445	5.50157
COBS00049	6.39608	6.36013	6.39398	7.41437	6.90524	6.02605	8.77578	8.89975	8.76811	7.0672	6.80273	7.97723	6.74707	6.71856	6.59994	7.03713	7.38648	7.34931	8.70541	8.92645	8.7175	4.00157	7.67178	8.26036
COBS00050	10.6242	11.1607	11.4747	10.7833	10.1355	10.0207	10.4198	10.0379	10.3825	10.3196	10.3204	9.94987	11.1874	11.1959	11.4099	10.8498	11.0589	10.8325	11.1021	10.9991	10.0126	8.05655	10.7946	10.6986
COBS00051	10.2225	10.6817	10.8564	11.1805	10.8669	10.5698	10.3399	9.90497	9.72107	10.3551	10.5362	10.0955	10.6351	10.5746	10.7047	10.9272	10.837	10.8833	10.6012	10.6155	9.92481	10.8707	10.6689	10.5566
COBS00052	13.1841	12.8288	13.4562	12.0421	11.5542	12.5733	11.4565	11.7675	11.543	12.2866	12.3421	11.7352	13.1375	13.3553	13.2003	11.9245	11.9848	11.9818	11.706	11.7294	11.5736	12.8171	12.4832	12.1657
COBS00053	10.2421	11.2844	12.3154	11.0981	10.0138	10.9823	10.1432	9.20572	9.27439	8.60215	9.15874	9.17188	10.8996	12.4969	11.5059	10.6351	10.5757	10.941	9.90666	10.1622	9.53432	9.77713	9.09902	10.0242
COBS00054	5.91947	5.66582	4.83614	5.50051	4.95404	4.33945	5.77203	5.28301	5.54771	5.70832	4.87603	5.47133	5.84507	5.52868	5.78365	5.28685	5.34678	4.98896	5.72372	5.58066	5.45065	4.00157	5.40561	5.43281
COBS00055	4.36517	4.00157	4.00157	4.00157	4.36716	4.58417	5.73194	5.04052	4.89811	4.79992	4.00157	4.83041	4.00157	4.00157	4.53523	4.27229	4.00157	4.25294	4.51538	4.45129	4.00157	4.00157	4.00157	4.39871
COBS00056	8.99202	7.65675	8.06047	7.87395	8.40704	8.50454	8.98483	9.66913	9.77993	8.81079	8.52379	10.3268	8.43197	8.55696	7.91628	8.12056	7.93527	8.08965	8.84095	8.9006	9.51611	10.2683	8.36076	9.55524
COBS00057	8.90842	9.546	9.74371	9.26857	8.88588	8.78165	9.43842	8.84632	9.26192	8.73889	9.204	9.25341	9.5528	9.36983	9.47844	9.01528	9.31795	9.16662	9.28301	9.31586	9.37049	8.66803	9.39497	9.55875
COBS00058	6.26236	4.84726	4.9838	5.13009	5.36949	5.6672	5.40469	5.09424	4.52469	5.48382	5.35526	5.59925	5.13829	4.00157	4.8384	4.96131	5.09339	5.26832	4.88249	4.94267	4.88522	4.75941	4.84358	4.73885
COBS00059	11.4662	11.7402	12.6426	11.3487	10.74	11.7613	10.029	10.1837	9.80934	13.1041	12.8792	10.4765	12.0066	12.0443	12.2857	10.9876	10.9648	11.2068	10.2091	10.1333	10.2417	11.9158	11.7787	11.4435
COBS00060	4.72315	7.511	7.88245	7.03863	6.0775	6.55038	5.69046	5.58118	5.89898	4.91966	5.77192	5.47133	7.28558	7.71081	7.89619	7.2638	7.23958	7.36662	6.80571	7.07969	5.52672	4.00157	7.28568	7.07874
COBS00061	9.85118	9.70722	9.65177	8.13083	8.36684	7.8754	9.41552	9.96185	9.26443	10.312	11.2601	9.3326	9.45776	10.0291	9.77168	8.36106	8.57729	8.26042	9.23953	9.44496	9.54634	9.68762	8.90716	9.34088
COBS00062	11.2464	10.8725	11.151	10.7398	10.3405	11.1911	9.5661	9.90206	9.81787	10.0701	9.10408	10.1813	10.9254	10.836	11.1532	10.1633	10.1084	10.4247	9.62643	9.75646	9.8395	9.90516	10.2984	10.0952
COBS00063	9.92743	9.71891	10.065	9.59956	9.43128	9.63828	8.81134	9.1258	8.96864	9.527	9.41757	8.86477	10.085	9.95178	10.0743	10.073	9.7689	9.95942	9.13004	9.07669	9.21604	8.40428	9.84799	9.11305
COBS00064	9.47747	9.65343	10.0828	8.62514	8.17831	8.12932	8.05472	8.12284	7.8786	7.59537	8.67088	7.89141	10.4453	10.8227	9.49848	9.36903	9.41268	9.59017	9.16403	8.84254	8.06996	5.67629	9.12716	8.97616
COBS00065	10.2311	9.97423	10.4475	9.40839	8.41144	9.10235	8.98483	9.19627	8.85702	9.16314	9.30439	9.02399	10.5163	10.9082	10.4301	9.25337	9.13654	9.59472	9.45334	9.29076	9.29889	4.00157	9.69778	9.52205
COBS00066	4.51443	5.62952	5.31979	6.96998	5.32615	7.96001	4.59308	4.35454	4.82212	4.00157	4.62456	5.43694	5.28168	5.21973	5.61361	5.15258	5.27726	6.92573	4.36585	5.40836	4.51701	4.00157	4.96043	4.87883
COBS00067	4.00157	5.28755	4.53377	6.37641	4.36716	7.46111	5.16141	4.60994	4.00157	6.27342	5.93575	5.28722	5.28168	4.62407	4.37999	4.71169	4.00157	6.78327	4.88249	4.83471	4.63121	4.00157	6.04768	5.75943
COBS00069	4.94899	6.08533	5.04887	5.6744	4.95404	5.7736	5.50816	4.70236	4.00157	6.36801	5.47464	5.36471	5.62235	5.28919	5.11245	5.23529	5.17648	5.50451	4.51538	4.89054	4.88522	4.87342	6.05764	5.56635
COBS00070	12.0814	11.762	11.606	11.9639	12.3184	12.2844	12.0011	11.8376	11.9541	12.8155	12.6272	11.8781	11.3964	11.4387	11.4993	11.673	11.7545	11.6992	11.501	11.5769	11.7665	13.2493	12.6857	11.8225
COBS00071	10.5145	10.5374	10.6659	9.77965	9.31656	9.89661	9.11497	8.97358	8.47142	10.9999	10.8853	9.77593	10.7001	10.2189	10.3937	10.0677	9.95602	10.0917	9.3995	9.31763	9.24337	10.7073	11.3148	10.1598
COBS00072	5.07063	6.13532	7.82723	6.72913	6.21086	7.4167	6.0842	6.03803	5.95326	5.85257	5.22066	5.71442	6.66234	6.51274	6.11573	7.25842	7.88373	7.85053	5.999	6.09361	5.36893	4.00157	5.19778	5.60759
COBS00073	9.5794	9.85927	10.2514	6.85477	6.23182	7.84234	10.2195	10.6616	9.45602	9.11592	9.11991	9.96695	9.80284	10.9453	10.4055	8.35107	8.45934	7.49015	9.07063	8.1565	9.41049	7.77674	8.64425	9.38506
COBS00074	8.03457	9.21011	9.00963	8.72534	7.89977	7.03982	8.87152	8.37038	8.71785	8.16018	8.21977	8.63725	8.81451	9.65651	9.36897	8.34605	8.56918	8.33001	9.44273	9.5709	8.33826	8.27652	9.36976	9.63722
COBS00075	13.7456	12.7788	14.2233	9.57212	9.78936	10.0084	12.5696	13.2076	12.7879	11.8195	11.7841	12.9916	13.4798	14.4337	13.3819	9.5011	9.82014	9.91201	12.3759	12.12	13.2891	11.4188	11.9676	13.045
COBS00076	9.31544	8.70226	10.1218	5.96082	5.92872	4.82007	7.54148	8.34489	8.00406	6.56582	7.30211	7.43241	9.17735	9.99096	9.19697	6.21735	6.44879	6.43628	8.73704	8.35327	7.59962	8.144	8.25844	9.26839
COBS00077	12.8113	11.4933	13.19	8.80243	9.00694	8.43251	11.6974	12.3096	12.1866	10.9963	11.022	12.0623	13.0359	13.7778	12.7528	9.1144	9.3956	9.32973	11.6863	11.5488	12.3767	10.4472	11.0459	11.7081
COBS00078	13.2519	12.8957	12.8767	7.09491	6.02981	6.63186	8.97311	9.40969	8.91232	9.6496	9.46171	9.70097	12.7098	14.2516	15.4645	6.14646	6.39284	6.42784	9.4256	8.70808	9.86531	8.08897	9.9422	9.70003
COBS00079	9.96926	6.89925	7.70229	5.33168	5.52733	6.78159	11.8075	12.7108	11.9583	11.897	11.6611	13.7285	8.51114	8.59708	7.9685	6.17052	6.8631	5.66905	11.3806	11.1802	12.3583	12.2813	11.9707	12.936
COBS00080	11.7533	12.487	12.1454	12.5611	12.4453	12.0749	12.2101	12.0287	11.9568	12.2759	12.7918	12.0925	11.8989	11.849	12.1375	12.4069	12.1974	12.1398	12.2638	12.3622	11.9559	12.674	12.7176	12.3098
COBS00082	11.5149	9.96117	10.537	9.28258	10.4046	11.3297	11.5475	11.9479	12.1691	11.3441	11.1373	13.0023	10.5854	10.9975	10.3818	10.073	10.0716	10.1841	10.8803	10.8389	11.748	11.523	9.75803	11.5703
COBS00083	10.6792	9.92127	10.714	9.29843	9.51118	10.452	10.8894	10.8391	11.123	10.2518	10.2502	11.7901	10.3593	10.9453	10.3004	10.0432	9.92065	10.2867	10.4705	10.7036	10.8624	10.3753	9.35841	11.3995
COBS00084	11.1856	10.5679	11.0881	9.89484	9.96835	10.3639	10.0863	10.4857	10.596	10.6514	10.2927	10.3846	11.1192	11.5169	11.1462	10.5565	10.5032	10.4605	10.5106	10.3902	10.5408	11.1574	10.6317	10.1955
COBS00085	9.95892	8.28593	8.73111	9.69541	6.79996	8.02034	12.0188	5.67536	4.73743	9.31151	9.41115	6.99815	11.4051	8.00377	8.76821	10.4636	6.45789	7.06566	12.1165	6.25816	5.66513	11.8342	9.09788	7.14964
COBS00086	4.00157	5.47171	5.57248	6.15793	5.13166	7.06898	4.83244	4.00157	4.00157	4.91966	4.00157	5.01005	5.28168	5.21973	5.84548	4.80452	4.69219	6.38485	4.00157	4.32021	4.51701	4.00157	5.17658	4.68519
COBS00087	6.2823	6.6889	7.98056	7.14015	6.33192	5.55026	6.58899	6.97019	5.89898	7.0672	5.85654	6.61841	7.72648	8.02076	7.92291	7.50507	7.39112	7.52135	7.76622	7.04532	6.89155	4.00157	6.89792	7.2758
COBS00088	9.36106	9.68951	10.0075	9.54083	9.41606	9.23726	9.17418	8.94845	9.26443	9.0716	9.33861	9.21872	9.81247	10.0478	9.51825	9.84527	9.83373	9.71931	9.75545	9.69494	9.05428	8.29747	9.89913	9.64935
COBS00089	8.28289	8.75245	8.32204	9.84582	8.84748	5.94003	9.15702	7.01456	7.32472	6.91253	8.43788	7.10795	7.6743	8.04587	8.33922	8.53649	8.62893	8.67333	8.24435	8.62438	7.39167	9.05125	8.24615	8.81316
COBS00090	4.72315	4.84726	4.53377	4.66402	5.36949	4.00157	4.00157	4.00157	4.00157	5.54418	4.00157	4.48445	4.44071	4.62407	4.65334	4.65994	4.64182	4.82511	4.51538	4.70844	4.81027	4.00157	4.57792	4.73885
COBS00091	5.07063	6.4976	6.06116	7.2839	6.97927	5.09816	6.25671	5.51384	5.4302	5.48382	4.00157	5.01005	6.22835	6.38331	6.20969	6.44894	6.23106	6.2469	5.72372	6.11103	5.23313	4.00157	5.84178	6.08653
COBS00092	5.22726	4.00157	4.37895	4.33497	4.95404	4.00157	4.00157	4.60994	5.29847	5.27975	4.00157	4.48445	4.00157	4.7611	4.00157	4.00157	4.00157	4.43587	4.51538	4.00157	4.51701	4.62267	4.33579	4.39871
COBS00093	10.836	11.3585	10.6551	11.815	11.6931	10.5177	11.7098	10.6573	10.7341	10.4773	11.2548	10.6613	10.2851	10.2371	10.7537	11.0237	10.9536	10.5106	10.8316	11.009	10.9539	12.2664	10.991	11.0046
COBS00096	11.0467	10.5341	9.85095	10.8015	11.5586	11.0475	11.0843	11.0173	11.1462	10.8958	11.1373	10.9373	10.3243	10.2408	10.1051	10.3481	10.0529	10.0597	10.0999	10.1741	10.7969	11.8096	10.3694	10.3193
COBS00098	6.65953	6.6889	5.95586	5.80197	6.44288	5.6672	6.11458	5.44222	6.0053	5.3522	5.58241	5.20339	6.64032	6.69716	6.25427	5.71737	5.87429	5.69934	5.69245	6.05805	4.95364	4.44244	4.96043	5.35943
COBS00099	6.64448	7.06964	6.59421	7.72877	7.74761	6.47854	7.50916	6.90086	7.32472	6.13574	6.72027	7.16441	7.07491	6.87879	7.09341	7.29039	6.89645	6.90796	6.90983	7.00115	6.99027	4.00157	6.93466	6.96876
COBS00101	13.0132	12.5897	12.0608	12.8149	13.61	12.8232	13.0151	12.8526	13.1109	12.8441	13.1238	12.8528	12.2555	12.2171	12.2365	12.5076	12.3547	12.2778	12.2228	12.3296	13.0431	13.69	12.4718	12.2832
COBS00102	9.71027	10.1398	10.106	9.88831	8.51314	8.91439	8.85458	8.84026	8.53503	9.54979	9.54613	8.77803	9.80042	10.1222	10.1124	10.2743	10.1579	10.453	9.53551	9.81167	8.72104	4.44244	11.0606	10.2943
COBS00103	4.36517	4.84726	5.16646	5.21568	5.18399	6.5643	4.00157	5.2391	5.61979	4.65614	5.0648	5.40143	4.00157	4.44343	4.7521	4.99619	4.93536	5.15144	5.22942	5.20316	4.72674	4.62267	5.01317	5.3338
COBS00104	5.12576	5.18159	4.37895	4.66402	4.81061	4.00157	5.08996	5.9687	5.54771	4.46639	4.00157	5.32668	4.44071	4.44343	4.37999	4.92491	5.14959	4.82511	5.22942	5.31083	5.36893	4.00157	5.31627	5.47912
COBS00105	7.57169	8.56638	7.0989	8.44443	8.60045	8.33312	8.18945	7.49155	7.98592	7.95039	8.01434	7.84077	8.25919	7.22839	7.44838	7.98488	7.99718	8.0974	7.1927	7.58143	7.76732	5.35138	7.59603	7.53263
COBS00106	6.34041	8.52698	7.03883	7.72877	7.49634	6.79337	6.87312	6.98141	6.85864	6.61742	6.72027	6.72356	8.82883	7.30022	6.74456	7.32166	7.31004	7.15841	6.69311	7.30649	7.14785	8.72061	7.46363	7.33213
COBS00107	11.6349	11.7695	11.1807	11.3885	11.5904	11.591	11.2552	10.9868	11.1305	11.5868	11.8812	11.2505	11.647	11.4324	11.5272	11.3955	11.5092	11.3818	10.9191	10.9924	11.3068	11.8771	11.772	11.0867
COBS00108	9.75708	10.429	9.73066	10.9992	11.6773	10.4189	12.0344	11.391	11.8489	10.4756	10.622	11.0654	9.67929	9.66999	9.5029	9.63343	9.89252	9.56438	10.5388	11.0166	11.3991	11.1459	9.83509	10.4951
COBS00109	4.36517	5.62952	4.91335	6.0232	5.36949	5.98377	7.64419	9.30583	9.92289	6.76149	8.46296	9.76546	5.51999	5.06398	5.11245	5.02971	5.12191	5.01816	12.6293	10.3604	10.9748	8.91358	9.22416	11.7256
COBS00110	4.62807	5.33666	5.16646	5.64717	6.51208	4.33945	6.33517	5.89536	6.30037	5.94014	6.32938	5.91622	4.87008	4.7611	4.53523	4.75966	5.03355	4.61349	5.999	5.12426	5.7592	8.08093	6.11586	5.72324
COBS00111	5.27434	5.33666	5.16646	5.77751	6.57792	4.00157	6.30953	6.08225	5.38807	5.48382	5.35526	5.50469	5.34641	4.87534	4.65334	4.92491	5.00205	4.70643	5.66034	5.03811	5.45065	4.00157	5.31627	5.19517
COBS00113	4.88089	5.18159	4.9838	5.77751	6.02981	4.33945	6.22949	5.76259	5.20034	4.46639	4.00157	4.95444	4.62026	4.44343	4.7521	4.84678	4.82376	4.70643	5.22942	5.24034	4.81027	4.00157	4.96043	5.28059
COBS00114	4.94899	5.62952	5.16646	6.46632	6.18956	4.82007	6.72889	5.19318	6.97505	5.11707	4.87603	5.24618	5.46512	4.87534	5.05165	5.02971	5.09339	5.07383	5.36487	5.90497	6.09992	4.00157	5.33475	5.60759
COBS00115	9.66735	9.35199	9.5953	9.06127	9.12129	9.23726	9.24411	9.33627	9.32319	9.56904	10.0665	9.35872	9.63925	9.60412	9.70999	9.51009	9.49196	9.47029	9.39511	9.27622	9.21854	10.6408	9.4899	9.54229
COBS00116	11.6242	11.42	11.6313	11.9079	12.1789	12.4709	11.8439	11.9209	11.9836	12.1559	12.0067	11.8486	11.5922	11.5265	11.4871	11.8857	11.8956	11.866	11.7811	11.7691	11.9797	12.1739	12.0709	11.4923
COBS00117	10.4271	10.0942	10.1332	10.0561	10.2877	10.4328	10.6333	10.7131	10.9482	10.5175	10.243	10.7206	10.1454	10.1183	10.2276	10.321	10.3283	10.167	10.6917	10.5995	10.6404	10.7344	10.4464	10.0887
COBS00118	10.5315	12.1431	13.0549	11.8177	9.85367	10.7914	9.58418	9.26571	9.30872	9.8253	9.99107	9.49902	12.5973	13.016	12.7839	11.7064	11.8206	12.2448	11.1413	11.1046	9.4039	8.97111	11.4543	11.4589
COBS00119	7.58723	8.73335	9.64185	8.30995	8.52537	7.58656	8.06214	7.7474	6.91158	8.06367	8.29156	7.74606	9.42986	9.66731	9.2505	8.66289	8.51742	8.63309	8.26863	8.1565	7.86695	8.79113	8.66899	8.2135
COBS00120	9.38995	7.93029	8.77175	7.81432	8.22406	8.96628	10.0347	8.57782	8.50145	10.1617	10.0787	9.05136	8.8383	8.71111	8.56755	8.47348	8.00624	8.20174	9.40825	8.26381	8.53634	13.0338	8.52566	8.04969
COBS00121	9.53233	10.6505	10.4645	11.9846	12.1876	11.0925	9.44974	8.62795	9.15814	9.74859	9.5979	9.2231	9.77108	9.94515	10.6913	11.6855	11.6645	11.7792	9.86278	10.0567	8.57991	7.77674	9.85204	9.57964
COBS00122	8.6461	8.30677	8.69314	9.10699	9.37169	9.89928	9.33846	9.20572	9.23922	9.40018	9.39173	9.14441	8.36795	8.71111	8.44877	9.15795	9.2022	9.0886	8.91348	8.89585	9.24828	9.90516	9.22624	8.81903
COBS00123	13.9548	13.0509	13.3289	13.4729	13.7326	14.4669	13.5034	13.2693	13.4654	13.4809	13.6068	13.3377	13.2686	13.5268	13.0799	13.3814	13.3216	13.3734	13.0097	13.035	13.2053	14.1319	12.9372	12.7683
COBS00124	11.6579	12.4454	12.9818	12.0276	10.1101	10.0096	11.1994	10.5822	10.4652	10.0565	11.0758	10.6781	12.7802	13.4183	12.6805	11.9357	12.0798	11.7206	12.8005	12.9042	10.4231	8.07285	12.343	12.6544
COBS00125	8.86472	8.65025	8.53894	8.97019	8.76404	8.28072	9.48041	9.15293	9.57159	8.74455	8.37321	8.94658	8.69968	8.52166	8.59266	9.11735	9.60028	9.29093	9.87703	9.8453	9.28939	4.44244	8.88227	9.13046
COBS00126	8.16925	8.2487	8.53035	8.6746	8.08768	8.56305	7.41919	7.94174	7.84543	8.33566	8.57067	7.80599	8.15676	7.93372	8.51158	8.57559	8.59138	8.80356	8.29251	8.0872	8.03616	9.68234	8.74365	8.00563
COBS00127	10.0411	10.1643	9.76397	9.51733	9.36264	9.05042	9.60963	9.90642	10.063	9.31532	9.92054	10.0107	10.13	9.85835	10.0935	9.86991	9.97147	9.8478	10.0209	9.7004	9.83461	4.62267	9.90889	9.87542
COBS00128	7.46633	7.36868	6.7836	7.26773	8.04296	4.47832	6.80288	7.1197	6.68647	7.42136	6.27146	7.1736	7.58663	7.22839	6.91646	7.56275	6.92902	7.58177	6.99496	7.12149	6.60879	8.56826	6.72238	6.43422
COBS00129	10.5699	11.262	10.8199	11.4024	11.3832	10.3561	10.5009	10.3559	10.6486	10.0451	9.87931	10.1914	10.8479	10.6155	10.8736	12.0731	11.5862	11.99	10.8534	10.8033	10.5676	10.0311	10.3302	10.3027
COBS00130	12.176	11.5018	12.1845	11.0136	11.3926	11.6397	11.1783	11.4075	11.3957	11.698	11.2814	11.5812	12.029	12.2134	11.7809	11.5923	11.2797	11.4302	11.2334	11.1753	11.2139	11.8053	11.4384	11.2374
COBS00131	6.84159	6.4788	6.82715	8.54762	7.08346	9.39509	6.5021	6.35576	7.04759	6.82824	5.77192	7.03908	6.37114	6.51274	6.43817	6.56023	6.58757	8.64546	6.43567	6.90837	6.5112	4.44244	5.98621	6.22939
COBS00132	12.5053	11.8893	11.963	11.3353	11.3948	11.6175	12.4852	12.4187	12.8431	11.4858	11.6852	12.4227	11.7855	12.1218	12.1353	11.6887	11.5189	11.5495	12.1861	12.4042	12.2557	12.2813	11.1736	12.0938
COBS00133	12.0266	12.0811	11.7353	11.9332	11.6077	11.3302	11.4973	11.6689	11.7169	12.1096	11.8507	11.8098	11.6999	11.6128	11.917	11.6688	11.678	11.4823	11.706	11.7746	11.6614	12.3129	12.4028	11.8339
COBS00134	8.94784	8.7295	8.71982	8.50038	9.11322	8.88234	9.22117	9.31895	9.03168	8.44408	8.74426	9.54524	9.30913	9.168	8.88118	8.7716	8.64059	8.89663	8.84418	8.63011	9.46427	9.21036	8.22543	8.6558
COBS00135	10.72	10.3385	10.7551	10.6469	11.6092	11.2997	11.6011	11.1536	11.2432	10.9664	10.5826	11.2457	10.1978	10.5427	10.533	10.617	10.9138	10.4705	10.741	11.1846	11.3514	10.6851	10.0578	10.9025
COBS00137	5.17783	5.23597	4.53377	6.42212	6.35106	4.00157	7.53078	6.42456	7.489	5.3522	5.58241	5.79404	4.87008	4.62407	4.9158	5.28685	5.86	5.04643	6.61775	6.96477	6.81263	4.00157	5.27829	5.75943
COBS00138	4.00157	4.84726	4.00157	6.39182	6.89251	4.00157	7.52001	6.56762	7.02382	6.022	5.47464	6.11007	4.75649	4.87534	4.65334	5.31168	5.65727	5.12628	6.43567	7.26247	6.31166	4.00157	5.33475	5.86194
COBS00139	5.89297	6.03332	5.6455	8.14408	8.00266	6.5643	9.67134	8.05627	8.88656	6.53927	7.09092	7.1736	5.57231	5.41553	5.78365	7.00523	7.63344	6.43628	8.95589	9.29437	8.43208	4.00157	6.39667	7.51818
COBS00140	8.61628	9.55037	8.43228	11.3097	11.8601	10.0426	12.9389	11.8508	12.7258	9.4837	9.88857	11.1529	8.75073	8.49764	8.73101	10.1922	10.9908	9.72182	12.3494	12.6613	12.1286	4.75941	9.3306	10.859
COBS00141	8.59351	8.18255	8.31705	8.24588	8.3623	7.94453	7.4872	8.11279	8.12493	8.68692	8.43788	8.61739	7.88167	8.02917	8.25251	8.41717	8.45494	8.53962	8.1002	8.04911	8.35661	4.62267	8.98921	8.28323
COBS00143	4.00157	4.54097	4.53377	4.93054	5.23364	4.00157	4.59308	4.00157	4.00157	4.00157	6.01026	4.00157	4.44071	4.44343	4.7521	4.00157	4.00157	4.50244	4.00157	4.45129	4.95364	4.00157	4.81141	4.00157
COBS00144	4.94899	4.38409	4.75006	6.0232	5.78968	4.00157	4.83244	4.00157	4.00157	5.42	6.67712	5.20339	4.62026	4.00157	4.37999	5.06201	5.34678	4.82511	4.88249	4.45129	4.72674	4.00157	5.48813	5.10156
COBS00146	4.00157	4.00157	4.00157	4.80946	4.81061	5.27175	4.00157	4.70236	4.37248	4.46639	4.00157	4.48445	4.44071	4.44343	4.00157	4.00157	4.00157	4.25294	4.00157	4.7744	4.00157	4.62267	4.57792	4.56146
COBS00147	11.519	11.0433	10.9226	11.0457	11.5986	10.6841	10.6382	10.4493	10.5352	11.7017	11.8172	10.5001	10.9626	11.1553	10.9255	10.5225	10.4031	10.363	9.88489	9.92898	10.3078	12.5766	11.8177	10.7327
COBS00150	4.00157	4.66032	4.53377	5.29445	4.63148	4.00157	5.81083	5.67536	5.5099	5.54418	4.87603	5.40143	4.62026	4.62407	4.37999	4.65994	5.22814	5.04643	4.95071	5.24034	4.95364	4.00157	5.15492	5.84544
COBS00151	4.00157	4.66032	4.37895	5.29445	6.33192	4.75039	6.25671	6.87697	6.25908	5.94014	5.58241	6.1687	4.00157	4.00157	4.37999	5.02971	5.47353	5.37313	4.80775	5.34434	6.85265	4.00157	5.25876	5.54516
COBS00152	5.75126	5.66582	4.9838	7.24312	9.68625	8.23907	8.98483	8.83722	8.59594	7.77281	8.01434	8.45529	5.34641	4.87534	5.16953	6.39972	7.15997	7.50973	6.6484	7.4176	8.96155	8.38485	6.69185	7.66965
COBS00153	6.97892	7.93029	7.44172	7.36209	7.36557	4.00157	6.70976	7.04694	7.05932	7.657	6.95426	7.44002	7.63114	7.44646	7.32296	7.51859	7.56948	7.59648	7.33859	7.07118	7.30866	7.58493	7.75824	7.38098
COBS00154	7.30618	6.92685	7.55686	6.84381	7.36557	6.08697	6.6507	6.59746	6.95001	10.5372	10.6468	7.6642	6.74707	6.24002	6.53041	6.82647	6.88984	6.8027	6.72213	6.90837	6.57703	10.6353	10.694	8.92808
COBS00155	7.6915	6.92685	7.75507	7.22647	7.68336	7.25774	7.57308	7.87192	7.83871	8.42304	7.62629	8.13015	7.40608	7.98657	7.75454	7.67152	7.25498	7.58177	7.45391	7.40418	7.85406	6.77595	7.56656	7.40217
COBS00156	8.43166	7.95033	6.20455	10.3718	11.2101	10.6544	9.96346	6.12499	6.0553	5.89712	5.47464	6.51927	8.83357	8.22503	6.31843	11.4145	12.5203	11.4076	11.5	12.0017	5.52672	4.00157	6.12531	6.24164
COBS00157	8.1008	7.86137	8.13047	7.17532	7.06097	7.75022	7.10887	7.51472	7.17155	11.2891	10.7161	7.32958	8.32138	8.28244	8.29906	7.41633	7.23441	7.74243	7.2331	7.0101	8.32434	7.87311	7.93999	9.15851
COBS00160	11.9548	12.8906	12.6111	13.1037	12.6249	11.9352	12.5572	11.9824	12.2202	12.4404	12.9266	12.4162	12.313	12.8466	12.6997	12.677	12.5276	12.6135	12.5293	12.8414	12.0774	12.2442	13.1796	12.9615
COBS00161	8.98037	9.19066	9.26377	8.93005	9.19956	9.32927	8.94538	9.06994	8.77865	8.69863	9.08807	8.77803	9.06894	9.17179	9.08061	9.21403	9.20874	9.43005	8.88553	8.98576	8.84307	8.36515	8.89804	8.97616
COBS00162	9.5736	10.3573	9.77672	11.51	12.2688	10.7283	11.9778	11.4691	12.0786	10.746	10.8922	11.1373	9.64195	9.65109	9.80246	11.0578	11.3446	10.6264	11.5122	11.8954	11.6302	9.42184	11.2829	11.056
COBS00163	4.94899	4.76009	4.00157	4.66402	4.00157	4.00157	5.69046	6.338	5.97955	5.54418	4.62456	5.65824	4.00157	4.00157	4.00157	4.00157	4.00157	4.35662	5.22942	4.94267	6.44202	4.00157	4.77775	5.06816
COBS00164	4.88089	6.51615	5.10952	8.70169	5.07627	10.6353	8.66837	9.00642	8.63902	7.66901	7.21544	7.94031	5.40739	4.44343	5.11245	5.70015	5.41201	8.82235	7.41066	7.62249	9.39507	4.62267	6.86563	7.64328
COBS00165	7.8606	8.65838	7.67123	10.622	10.8661	8.08295	12.0632	11.4055	12.2643	9.61915	9.80295	10.5688	7.51714	7.80222	8.09717	9.82381	10.3813	9.32863	11.8008	12.1203	11.5911	9.6475	9.28936	10.743
COBS00166	10.4034	10.313	9.93297	9.60434	9.06106	11.9472	9.48041	9.47369	9.44724	9.67055	9.29047	9.72588	10.4061	10.7472	10.4925	10.5565	11.2302	11.0084	11.738	12.1355	9.61831	11.068	9.45036	10.5735
COBS00167	4.51443	5.0626	4.00157	4.47203	4.95404	4.00157	4.59308	4.78321	5.47076	4.00157	4.00157	4.59162	4.44071	4.44343	4.00157	4.75966	4.58682	4.89473	4.95071	5.12426	4.51701	4.00157	4.66564	4.39871
COBS00168	7.2485	6.31812	6.27074	5.29445	5.78968	4.00157	6.78475	7.72775	7.32472	6.06104	6.01026	7.27095	6.93863	6.801	6.25427	5.33594	5.4329	5.84035	7.26266	7.32087	7.47854	4.87342	6.93466	6.96876
COBS00169	10.8189	10.1209	10.3859	9.04492	8.41582	9.10003	8.83744	9.54988	8.78215	8.86894	9.48022	9.3427	11.0719	11.4021	10.5776	9.59171	9.36784	9.86374	9.37739	8.9311	9.03165	8.94484	9.59517	9.71689
COBS00170	8.63127	9.10415	8.99723	8.98005	8.24394	8.45813	8.18266	7.81102	7.9174	8.26645	7.7744	7.54247	9.34277	9.17558	9.1997	9.35538	9.23331	9.40847	8.75088	8.54767	7.62265	4.62267	8.98429	8.54438
COBS00171	14.1452	13.7034	14.3243	10.8554	10.5951	11.4492	11.9774	12.1443	12.2767	11.9694	11.9168	12.2044	13.9241	15.1249	14.11	11.7664	11.7048	11.7938	12.2776	12.0696	12.2348	11.3826	11.9593	12.3671
COBS00172	8.33879	9.02473	9.44819	8.54429	7.96718	7.58656	7.97838	8.27012	7.6048	8.08171	8.08074	7.61809	9.44233	9.73555	9.25313	9.12614	9.29233	9.44931	8.56753	8.52322	7.9957	4.75941	8.59023	8.6732
COBS00173	8.69328	9.13357	8.98157	8.52082	7.7684	8.21348	7.9862	7.83569	8.03965	8.77805	8.89913	8.34283	8.87557	9.0979	9.04469	8.90542	9.0328	9.03995	8.88553	8.67518	8.5079	4.00157	9.70601	9.08247
COBS00174	10.7253	10.0563	10.5781	10.1659	9.86492	9.88857	10.8159	11.58	11.3064	10.4113	9.97376	11.0139	10.6791	11.3275	10.1325	10.4244	10.342	10.5547	10.5288	10.7104	11.5045	9.58655	10.6124	10.742
COBS00175	6.2823	5.55334	5.74719	7.25958	6.35106	6.98982	6.56778	6.47395	6.83139	7.03011	6.95426	6.1687	6.34378	5.67973	5.68457	5.84695	6.23106	7.14337	5.78392	6.21093	6.31166	4.87342	6.72238	6.35825
COBS00176	8.97744	9.20735	8.70845	9.96227	10.7198	9.82118	11.0988	10.7755	11.2266	9.55945	9.86529	10.1541	8.3548	8.4038	8.99536	9.64571	10.1361	9.54755	10.7727	10.9369	10.7792	10.0352	9.0087	9.71164
COBS00178	8.16925	9.39876	8.71982	10.5543	11.222	10.1719	11.4424	10.2819	11.1988	7.93061	9.08807	9.95646	8.66283	8.69537	9.15267	10.1126	10.5998	9.92798	10.8193	11.1933	10.4436	4.00157	7.70219	9.68726
COBS00180	4.00157	5.23597	4.37895	6.79907	7.18044	4.00157	7.35992	6.03803	5.75188	5.54418	4.00157	5.01005	4.87008	4.97491	4.8384	4.96131	5.14959	4.50244	5.52226	6.17847	6.02905	4.00157	4.87445	5.54516
COBS00181	4.62807	6.05959	4.91335	7.91064	8.95372	4.00157	8.84174	6.94746	8.01602	6.33722	6.43818	6.89025	5.67034	4.62407	4.8384	5.83148	6.32447	5.63795	6.47065	7.38381	7.46159	4.00157	5.53486	6.5933
COBS00182	4.62807	5.38358	4.37895	6.76455	6.81357	4.00157	6.87312	5.99224	5.68767	5.02391	5.22066	5.06232	5.05767	4.44343	4.9158	5.44955	5.22814	5.50451	6.28587	6.28873	5.1312	4.00157	4.98721	6.01599
COBS00183	4.36517	4.00157	4.00157	4.00157	4.72705	4.00157	5.60289	4.70236	4.37248	4.46639	4.87603	4.00157	4.00157	4.00157	4.00157	4.38387	4.00157	4.00157	4.36585	4.63505	4.81027	4.00157	4.66564	4.4872
COBS00184	4.00157	5.73525	4.75006	7.00962	7.34719	4.00157	7.83844	5.89536	6.34042	5.02391	5.77192	5.74155	5.62235	4.7611	4.98643	5.02971	5.60516	5.37313	5.48497	6.52374	6.33108	4.44244	5.17658	6.16639
COBS00185	4.00157	5.28755	4.00157	5.36762	5.45123	4.00157	5.50816	4.78321	4.00157	4.00157	4.00157	4.00157	4.62026	4.44343	4.7521	4.75966	5.30095	4.98896	5.48497	5.49782	4.72674	4.00157	4.41045	5.06816
COBS00188	10.3006	9.42278	9.65769	9.3826	9.80779	10.6078	9.50503	9.51229	9.69536	11.2116	10.7419	9.93926	9.52083	9.56137	9.53776	9.38255	9.34904	9.41776	9.42128	9.22224	9.60113	11.4695	11.0794	9.96721
COBS00189	6.43195	6.6889	6.54247	6.86565	6.4069	6.97961	5.73194	5.67536	5.95326	5.48382	6.98969	5.65824	6.25817	7.27192	6.91646	6.42947	6.44879	6.5336	6.57046	6.16194	6.18876	4.44244	5.99666	6.17923
COBS00190	11.8311	11.2513	11.2965	11.0515	11.0947	11.1763	10.8904	10.6939	10.9231	11.2369	11.0635	10.6773	11.2204	11.473	11.6282	11.0963	11.033	10.9805	10.6935	10.8315	10.6972	11.6731	11.5072	11.0519
COBS00191	5.72083	6.20688	5.98302	6.77615	6.36993	6.18252	5.73194	5.9687	5.03153	5.20178	6.38488	5.93928	6.03359	5.85523	6.49426	6.15855	6.47591	5.91778	6.32492	6.00278	5.90141	4.00157	5.7048	5.60759
COBS00192	12.1333	11.3911	12.3863	9.11372	9.04983	9.88048	10.1467	10.4828	10.3345	10.5388	9.95182	10.5225	12.1446	12.6124	12.5251	10.1266	9.62002	10.1865	9.8516	9.81921	10.5647	10.0801	10.4257	10.5163
COBS00193	9.2563	10.1784	9.29197	11.2655	11.7742	10.5764	11.2871	11.0032	11.4853	9.34912	9.82242	10.6104	9.03229	8.99452	9.66735	10.688	11.0208	10.469	10.8308	11.1281	10.9197	9.42184	9.18292	10.3324
COBS00196	4.36517	4.00157	4.00157	4.33497	5.13166	4.6728	5.08996	5.2391	4.00157	5.3522	4.62456	4.59162	4.00157	4.00157	4.37999	4.00157	4.00157	4.25294	4.80775	4.32021	4.367	4.00157	4.00157	4.39871
COBS00197	4.51443	5.28755	4.37895	4.87236	4.95404	4.00157	5.22791	5.58118	6.21646	4.00157	5.58241	5.06232	5.21259	5.28919	5.90435	4.60343	5.20265	4.78773	5.12777	6.05805	6.05311	4.62267	4.77775	5.4089
COBS00198	4.72315	4.00157	4.00157	4.80946	4.63148	4.00157	4.00157	4.00157	5.34422	4.00157	4.62456	4.75988	4.00157	4.00157	4.00157	4.38387	4.26473	4.66171	4.51538	4.63505	4.81027	4.00157	4.41045	4.62658
COBS00199	12.0494	12.1267	12.03	12.9097	12.6757	12.9282	11.8975	11.6198	11.7192	12.2671	12.5366	11.9262	11.7408	11.8951	12.1335	12.9455	12.5604	12.8092	11.7002	12.0427	11.42	12.6839	12.3244	11.9239
COBS00201	4.00157	5.76851	5.36619	5.17383	4.00157	4.00157	5.34902	4.00157	4.00157	4.00157	4.87603	4.00157	6.03359	5.85523	5.22342	4.84678	4.96936	4.70643	4.88249	4.99172	4.00157	4.00157	4.87445	4.56146
COBS00203	7.33416	7.64858	7.90928	7.23482	7.04958	7.1439	6.80288	6.87697	6.0553	6.7841	7.32986	6.48956	7.97936	7.87884	7.66227	6.84107	6.99811	7.36662	6.67837	6.28873	7.32754	4.44244	7.55992	7.21713
COBS00204	11.6418	11.4779	11.167	11.473	11.7574	11.506	11.7948	11.5254	11.8334	11.8033	11.7154	11.5863	11.5859	11.3752	11.34	11.4514	11.4544	11.397	11.4611	11.5511	11.6007	12.1828	11.6435	11.4047
COBS00205	9.09554	9.19345	9.45047	9.15348	8.48422	8.692	8.55753	8.37878	8.31103	9.43906	9.40471	8.50299	9.02402	8.96856	9.27911	8.87094	8.7771	9.14689	9.02583	8.3602	8.10841	8.37174	10.1588	9.4047
COBS00206	7.71994	6.88524	7.15651	6.85477	8.35318	8.70122	8.36743	8.19123	8.23128	8.53839	7.92675	8.33474	7.12279	7.44646	7.33301	7.24761	7.21354	7.08155	7.35696	7.65676	7.95406	10.3338	7.30968	7.14334
COBS00207	12.7854	12.7556	13.4832	11.8218	10.6975	10.479	12.4623	11.9416	12.2733	11.2499	11.9679	11.965	12.9198	13.821	13.153	11.9611	12.2046	11.8942	13.2677	13.2551	11.7686	11.0321	12.514	13.2184
COBS00208	12.2524	12.5686	12.3717	10.9992	10.6812	11.3267	12.3841	12.5478	12.6025	11.7397	11.8661	12.7645	11.857	12.3203	12.9449	11.407	11.6721	11.5804	12.4822	12.4	12.7695	12.6713	12.083	13.1308
COBS00209	5.27434	6.13532	5.41066	5.82595	5.36949	4.00157	4.83244	4.85579	4.89811	4.46639	4.62456	4.89485	5.28168	5.21973	5.41429	5.55251	5.4329	5.19987	5.59336	5.12426	4.367	4.44244	5.33475	5.06816
COBS00210	6.04418	6.92685	6.64406	8.47617	6.12349	9.40827	6.93998	6.26446	6.52445	6.17154	6.53884	6.85618	6.45002	6.48782	7.2716	6.78173	6.80801	9.12436	7.26266	7.38381	6.63982	4.00157	6.90323	7.4282
COBS00211	9.52032	9.5677	9.58083	9.34686	9.41606	9.55436	8.55753	8.9286	8.87022	9.97469	10.0908	9.22091	9.47303	9.24568	9.41188	9.25337	9.42058	9.38656	8.9104	8.56873	8.71395	9.89148	9.56505	9.01077
COBS00212	8.10618	8.69042	8.74602	8.86233	8.78451	9.00897	7.12326	7.96427	7.80459	8.16864	7.87151	8.068	8.79031	9.02841	8.84682	9.27462	9.10746	9.02246	8.4871	8.3602	8.15112	8.55094	9.02435	8.45413
COBS00213	7.43227	6.89925	7.11061	8.88875	8.33013	10.7079	7.31065	6.53711	7.51462	6.022	6.08065	6.84464	6.68402	6.2992	6.68215	7.38218	7.24473	9.17273	6.18286	6.37645	6.42415	8.37174	6.10634	6.1137
COBS00215	5.99576	6.51615	6.81278	8.41562	7.34719	8.01541	6.28338	5.76259	6.21646	6.24033	5.93575	5.62912	6.19785	6.41021	6.56562	7.24216	6.75794	8.19213	5.999	6.21093	6.42415	4.00157	6.07734	6.0014
COBS00216	5.12576	4.84726	4.91335	6.78766	4.88559	4.00157	5.34902	4.70236	5.09127	4.46639	5.0648	4.48445	6.19785	4.44343	4.65334	5.66495	4.69219	6.93161	7.35696	5.03811	4.00157	5.14257	4.74242	5.10156
COBS00217	4.00157	4.00157	4.00157	5.03593	4.63148	4.47832	4.42128	5.14499	5.47076	5.65612	5.35526	5.53709	4.00157	4.00157	4.00157	4.80452	4.7389	4.74829	5.32166	5.75368	4.72674	4.00157	5.17658	5.62767
COBS00218	5.40395	6.40086	4.91335	5.43608	5.23364	6.43353	4.72355	4.85579	4.52469	6.06104	6.38488	5.91622	6.31585	5.06398	4.7521	5.09319	6.09521	5.26832	4.62923	5.0822	4.95364	4.00157	6.19857	6.16639
COBS00219	8.25894	8.69438	9.01579	8.68066	8.19372	7.8754	8.37339	7.79223	7.95518	7.62034	8.1442	8.15795	8.51114	8.56276	8.69282	8.76786	8.88717	8.91279	8.30665	8.19962	7.84105	4.00157	8.71127	8.69678
COBS00220	6.5983	4.00157	6.84136	5.25583	5.45123	5.82348	4.00157	4.00157	5.72021	10.2597	9.74801	8.38261	4.00157	4.00157	4.00157	4.27229	4.37323	4.61349	4.80775	5.12426	4.51701	9.51994	10.2321	8.66235
COBS00221	9.45451	10.2753	9.32708	10.9888	11.5561	10.2587	11.0298	10.9991	11.272	8.97383	8.84299	10.2387	8.81451	9.168	9.86383	10.605	10.921	10.5421	10.8283	10.8852	11.0049	8.80093	8.60633	10.0634
COBS00222	5.62457	5.66582	5.36619	6.12085	5.81877	4.33945	6.33517	6.03803	6.39832	6.09893	7.6702	5.98417	4.87008	5.06398	5.4983	5.99188	5.96996	6.0141	5.97405	6.36223	6.3877	4.44244	4.84358	5.35943
COBS00223	5.5557	4.99675	4.00157	5.93933	6.52884	6.47854	7.03461	5.89536	7.04759	6.17154	6.1474	6.44374	4.87008	4.62407	4.8384	5.95013	5.84555	5.97884	6.89724	7.20931	7.28954	9.0054	5.53486	6.24164
COBS00224	5.22726	5.33666	4.75006	5.29445	5.28094	4.94265	7.28536	7.7474	7.489	5.3522	6.95426	6.77327	5.21259	4.87534	4.53523	5.61009	5.09339	5.4123	6.90983	7.25499	7.70403	4.44244	5.93261	6.94714
COBS00225	10.9999	11.3226	10.7932	12.0591	12.2431	12.1067	11.5992	11.1742	11.6265	11.1351	11.0346	11.1003	10.5295	10.3569	10.8973	11.4376	11.4514	11.3661	11.0865	11.3249	11.3847	11.332	10.7676	10.9006
COBS00226	7.94121	9.20181	8.65018	9.77258	9.86652	9.04801	8.64392	8.24736	8.87022	8.21021	8.29156	8.60736	8.23067	8.32404	8.82933	9.50784	9.57319	9.28078	9.0144	9.21273	8.80687	4.62267	8.2564	8.47908
COBS00227	11.1188	11.8772	11.0069	11.1757	10.85	10.5229	11.0241	10.4691	10.8724	10.1511	10.5243	10.298	10.6255	10.8922	11.356	11.32	11.4233	11.3557	11.3812	11.2955	10.7097	10.852	10.9983	10.9909
COBS00228	10.2001	10.5264	11.2358	9.6343	7.94303	8.60296	8.65864	8.75584	8.50145	9.22515	9.45549	8.99608	10.9198	11.1095	10.8745	9.68194	9.86715	10.0067	9.81259	9.65477	8.95254	8.79603	9.85608	10.1933
COBS00229	9.85915	9.21562	8.58115	9.73232	10.3969	10.7587	9.3981	9.38077	9.61535	10.0127	10.1536	9.12112	9.06492	8.7472	8.69669	10.2068	9.78822	10.1248	8.57144	8.98128	9.39949	9.54928	9.41702	9.00047
COBS00230	11.6409	10.9735	10.9094	10.5837	10.7813	10.7734	11.1715	11.2775	10.9934	11.0691	11.2673	10.9767	11.0659	11.525	11.2211	10.5913	10.4677	10.3768	10.9114	10.7906	11.0172	11.8828	10.5148	10.4939
COBS00231	5.01193	4.92543	4.75006	4.47203	4.81061	4.00157	4.00157	4.78321	5.29847	4.00157	4.62456	5.11173	4.62026	4.62407	4.7521	4.54066	4.64182	4.82511	4.62923	4.89054	4.81027	4.00157	4.66564	4.56146
COBS00232	9.57747	9.73626	10.5666	8.08576	8.22406	7.94971	8.56276	8.54836	8.84703	9.15042	8.91737	9.14672	9.28511	10.0764	10.2395	8.45495	8.71965	8.76037	8.85703	8.66125	8.52016	9.91421	8.99655	9.1336
COBS00233	7.65513	7.45578	8.03635	7.18397	7.06097	5.74787	6.82078	7.03623	7.56451	7.54406	7.85261	7.8635	8.29408	8.66334	7.94263	7.65532	7.35829	7.54051	7.54465	7.55135	7.59962	4.00157	8.03127	7.76643
COBS00234	10.8695	11.5619	11.4991	11.0058	10.5046	9.69162	11.0373	10.9703	10.9513	9.88283	10.6631	10.602	11.3859	11.8985	11.4658	10.9193	10.9482	10.9095	11.206	11.3619	10.8069	9.1993	10.9983	11.2087
COBS00235	11.7161	12.2049	10.7188	12.8084	13.6398	12.1006	14.3775	13.9787	14.3587	12.5884	12.7144	13.4294	11.3081	11.0187	11.2036	11.9871	12.476	11.6964	13.3333	13.5924	14.1286	12.451	11.9919	12.9541
COBS00236	9.2221	13.397	13.4576	10.9882	9.09695	11.3022	8.91302	7.8838	8.18968	6.6425	6.63256	7.71513	7.28558	11.7855	12.548	9.52346	9.15966	9.92798	8.52788	9.07038	7.29913	4.00157	6.74632	7.61189
COBS00237	7.95919	7.37862	7.15651	8.01537	8.77772	8.37601	8.06214	8.74939	8.88656	8.49201	7.27381	8.32251	7.76689	7.40805	7.6859	7.58003	7.53639	7.61105	7.67441	7.76017	8.83982	4.00157	7.12337	7.19296
COBS00238	10.3803	10.6019	10.6502	11.0004	10.5747	11.0684	10.6333	10.1201	10.4356	10.2675	9.75309	10.1216	10.4835	10.6404	10.8172	10.4786	10.5933	10.8107	10.2787	10.3526	10.0255	10.9153	10.0987	10.3847
COBS00239	12.0152	11.7088	11.3487	11.6696	11.6644	12.1622	10.7738	11.7924	11.0349	15.8196	14.8119	11.083	13.051	11.7573	11.5757	11.738	11.6044	11.7653	10.9695	11.1861	13.0406	14.9495	11.2941	12.3205
COBS00240	6.06773	5.80089	5.6455	6.12085	6.46052	6.64498	6.58899	6.31999	6.70167	6.39811	6.32938	6.50449	5.13829	5.28919	5.93278	6.317	6.31441	5.63795	6.57046	6.67942	6.593	4.75941	5.42262	5.87822
COBS00241	8.61251	8.85495	8.82187	9.05662	9.12397	8.06874	7.99398	8.07191	8.2002	8.66917	8.8043	8.02333	8.30779	8.07055	8.83635	9.0341	8.89854	8.577	8.59465	8.14451	7.59962	4.44244	8.54082	7.86469
COBS00242	12.9906	11.0739	11.2781	11.1048	12.4952	13.4948	12.1346	12.3519	12.6897	12.2359	11.6529	12.0392	10.8537	11.4245	11.3705	10.84	10.9146	10.8348	10.8725	10.9095	12.1783	13.1651	10.7659	10.5775
COBS00243	7.57948	7.28649	6.91034	7.08569	8.30197	7.26613	8.00171	7.61811	7.14981	7.10334	7.40997	7.25374	6.9913	6.76039	7.11696	7.0867	7.18165	7.32293	6.4878	6.5978	7.32754	4.00157	6.53505	6.43422
COBS00244	8.26376	8.93066	8.76811	8.64389	8.55746	8.99154	7.53078	7.46006	6.9874	7.64489	8.06443	7.95625	9.16612	8.79723	9.18603	9.17217	9.0792	9.03593	8.28777	8.31103	7.9957	5.06167	8.29469	7.85707
COBS00245	6.73243	7.46513	7.87566	8.10396	7.10559	8.51504	8.98871	8.99556	9.97419	9.04433	8.61607	9.64002	7.36704	7.28614	7.84121	8.68291	8.76473	8.09224	9.89114	10.1252	8.95555	9.71636	9.18828	9.78241
COBS00246	7.95919	9.49706	9.59118	9.51902	8.61957	7.98041	8.41447	8.52964	7.81834	7.63267	8.1442	7.9876	9.56425	9.39602	9.6927	9.81387	10.3515	9.85389	10.0008	9.96794	8.35661	4.00157	8.97317	9.0479
COBS00247	6.58255	6.78299	6.62765	6.37641	6.47792	4.00157	7.81226	7.54504	8.39575	6.24033	6.32938	7.64462	6.61793	6.91612	6.90292	6.90491	6.71353	6.61708	9.2566	9.29797	8.54035	4.44244	6.30952	7.62093
COBS00248	7.02569	8.02151	7.75507	9.2766	8.7222	8.26835	7.66387	7.04694	7.90458	7.46345	7.64842	7.20978	6.82689	7.50825	7.82003	8.67693	8.52373	8.60803	8.27823	8.79485	7.23055	9.47173	8.76675	8.64702
COBS00250	11.9846	12.0529	12.1666	13.3384	13.4881	14.1071	13.11	12.6943	13.0586	13.2029	13.1453	12.8257	11.3149	11.7636	12.0122	13.1374	12.8239	13.0468	12.2493	12.5356	12.8509	14.2488	12.7631	12.6256
COBS00251	5.31935	4.38409	4.00157	5.13009	4.36716	4.00157	5.01248	4.35454	4.00157	4.46639	4.87603	4.34381	4.96909	4.00157	4.37999	4.60343	4.69219	4.66171	5.32166	4.00157	4.00157	4.00157	4.62342	4.68519
COBS00252	6.58255	6.03332	6.0096	5.70102	5.84718	6.12604	5.73194	5.36559	5.81285	4.65614	4.00157	5.59925	6.22835	6.71856	5.90435	5.61009	5.86	6.08185	5.97405	5.55371	5.1312	4.00157	5.29745	5.50157
COBS00253	10.72	10.7751	11.0062	11.4967	12.0869	11.5537	12.7052	12.7484	12.3892	11.6102	11.6997	12.1546	10.7347	10.9857	10.9645	10.915	11.8443	11.3525	12.4853	12.7369	12.7143	12.416	11.7885	12.3589
COBS00255	8.49451	8.33748	8.22945	8.04394	8.0599	7.92887	8.69717	8.89975	8.95321	8.07272	8.55909	7.95096	8.3146	8.5097	8.27338	8.38817	7.85055	8.18971	8.51171	8.04911	8.86244	9.43133	7.93744	7.84942
COBS00256	11.4972	9.98072	10.5561	7.90025	7.7684	8.51155	11.1095	11.5249	10.661	10.7175	10.6495	10.7775	11.0436	11.6162	9.66735	8.33596	8.40794	8.11533	10.2941	10.1323	11.2006	10.1373	10.6246	10.2695
COBS00257	7.55598	7.46513	6.91034	5.64717	5.56353	4.47832	8.71606	9.3233	8.75393	8.33566	8.24892	9.17866	7.96209	7.44646	7.05733	6.05856	6.652	6.08185	8.52385	8.46343	9.44514	9.72409	8.79229	8.88768
COBS00258	6.85465	6.5703	6.4516	6.19399	5.69798	5.41991	6.14427	6.93596	6.60786	7.8902	8.26327	7.20082	7.12279	5.63152	6.276	6.68767	6.10709	6.41081	6.50474	7.2699	6.63982	8.35852	9.49423	8.24297
COBS00259	10.0647	11.083	10.6815	11.0879	10.4416	10.4565	10.8257	10.6216	10.3381	10.329	10.5273	10.3001	10.4013	10.4489	11.154	10.7208	10.7299	10.8539	10.3878	10.8677	10.872	9.51994	10.6215	10.9747
COBS00260	4.00157	4.66032	4.37895	4.80946	5.45123	5.82348	5.08996	6.3906	5.75188	5.11707	6.2109	5.53709	4.44071	4.62407	4.65334	4.54066	4.52574	4.50244	4.95071	5.03811	6.31166	4.00157	4.87445	5.10156
COBS00261	4.72315	5.0626	4.53377	4.98486	5.63268	4.00157	6.58899	5.76259	5.38807	5.42	6.01026	5.65824	5.28168	4.62407	5.16953	4.71169	4.82376	4.92735	5.01375	5.40836	5.32561	4.00157	5.06291	5.19517
COBS00262	9.71731	10.2567	10.1668	10.0362	9.86652	9.79704	9.89476	9.74402	10.0384	8.92484	8.75444	9.54349	9.97784	10.5917	10.5839	10.07	10.2714	9.95942	10.4388	10.397	9.84438	4.44244	9.18934	9.66137
COBS00263	7.26799	5.38358	4.53377	5.08422	5.41113	5.41991	7.83844	5.47861	6.59158	5.6015	6.08065	6.22481	4.96909	5.21973	4.9158	4.75966	4.78259	4.98896	5.01375	5.24034	6.40605	4.00157	4.93277	4.87883
COBS00265	9.14072	9.82904	8.70845	9.78668	10.2889	9.80275	10.8935	10.5483	10.7067	9.49045	9.56937	10.0283	9.02816	8.85033	9.31473	9.02315	9.48981	8.90987	10.1953	10.4975	10.5308	9.33353	9.00991	9.71269
COBS00266	4.00157	4.00157	4.37895	4.00157	4.00157	4.00157	5.40469	5.99224	6.50713	5.70832	6.01026	8.80753	4.00157	4.00157	4.7521	4.00157	4.26473	4.25294	5.999	7.75491	5.63204	4.44244	8.37588	10.9835
COBS00267	10.007	9.7033	10.0665	9.48654	9.27379	10.8	8.60898	8.86435	9.11444	9.72018	9.18155	9.32446	10.1605	10.008	10.0075	9.73655	9.60524	9.98741	8.97075	8.9077	8.94045	9.77464	10.1734	9.31758
COBS00268	7.46633	8.29117	7.06317	9.318	10.4724	8.59309	9.33542	8.82806	9.35873	7.27129	8.20497	8.62072	7.13839	7.24305	7.25052	8.89516	9.42508	8.98959	8.73704	9.12619	8.77315	4.00157	6.99052	8.0125
COBS00269	4.88089	5.51326	5.16646	6.19399	5.78968	7.01004	5.08996	5.73421	5.47076	8.32057	8.09687	5.89273	4.96909	5.06398	5.53805	5.09319	5.36897	6.22737	5.62733	5.37683	5.81807	4.62267	5.67813	5.56635
COBS00270	6.5505	5.38358	4.83614	5.08422	6.6253	8.21348	5.95491	6.44123	6.93732	6.59186	5.35526	6.31332	4.87008	5.35425	4.7521	5.53266	5.27726	5.53935	5.12777	5.20316	6.83944	8.58538	4.93277	5.03348
COBS00271	4.51443	4.66032	4.00157	4.57651	4.88559	4.00157	5.45763	5.14499	4.64053	4.00157	4.00157	4.34381	4.00157	4.7611	4.00157	4.27229	4.00157	4.25294	5.44638	5.0822	5.23313	4.00157	4.57792	4.39871
COBS00272	4.80628	5.92249	5.41066	7.09491	8.22406	4.00157	7.82104	7.1197	7.56451	6.06104	4.00157	6.65879	5.62235	5.21973	5.36972	5.84695	6.22026	6.0141	6.45327	6.88905	7.21032	9.60901	5.53486	6.45515
COBS00273	4.88089	4.00157	4.00157	4.74063	5.28094	4.00157	4.42128	5.09424	4.52469	5.70832	4.00157	5.50469	4.44071	4.00157	4.37999	4.38387	4.26473	4.25294	4.88249	4.83471	5.1312	4.00157	4.98721	4.99739
COBS00274	4.00157	4.00157	4.75006	4.87236	4.63148	4.00157	4.83244	4.85579	4.00157	5.65612	4.87603	4.00157	4.00157	4.00157	4.00157	4.27229	4.00157	4.35662	4.00157	4.32021	4.95364	4.00157	4.47319	4.56146
COBS00276	5.27434	5.23597	4.75006	5.53139	5.36949	4.00157	5.55651	5.6448	5.5099	5.27975	6.2109	5.59925	5.84507	4.7611	4.53523	5.49188	4.78259	4.89473	6.60217	5.20316	4.63121	4.00157	5.5195	5.38445
COBS00277	4.00157	5.70104	4.75006	8.01537	7.49634	9.8587	7.03461	6.84034	7.03576	6.20639	5.77192	5.65824	5.13829	4.87534	5.32321	5.20849	5.56907	8.41094	5.69245	6.16194	6.8787	4.00157	5.47212	5.50157
COBS00278	4.62807	4.99675	4.00157	5.17383	5.23364	4.00157	5.34902	5.14499	5.65422	5.20178	4.87603	5.01005	4.62026	4.44343	4.00157	4.54066	4.7389	4.43587	4.88249	4.89054	5.41056	4.00157	5.01317	4.87883
COBS00279	4.00157	4.66032	4.65157	5.25583	5.32615	4.00157	4.00157	5.44222	5.47076	4.65614	5.77192	4.00157	4.44071	4.44343	4.53523	4.84678	4.69219	4.78773	4.95071	5.65793	4.95364	4.00157	5.11005	5.43281
COBS00280	6.5983	6.85678	6.11074	7.16661	7.7051	7.21504	7.03461	7.19849	7.59683	6.89193	6.84219	7.05911	6.31585	5.52868	5.90435	6.42947	7.0522	6.80912	7.1511	7.29925	7.64531	4.44244	6.58934	6.79374
COBS00281	6.43195	7.03212	7.0989	7.39963	7.90603	7.02996	6.90695	7.17921	7.50613	6.39811	7.30211	6.97723	7.00843	6.76039	7.37252	7.46838	7.4722	7.26866	7.10823	7.17007	7.11554	4.00157	6.76985	6.63033
COBS00282	10.775	10.3647	9.92153	10.3643	10.7426	11.6571	10.131	10.5786	10.6429	10.6826	10.4418	10.6597	10.168	10.0499	10.294	10.2736	10.1892	10.0345	9.95373	9.98256	10.5458	11.0851	10.3679	9.98297
COBS00283	10.7033	11.4242	11.0888	10.8825	10.1115	9.44712	9.73747	9.84575	9.7046	11.148	10.9241	10.2278	11.2605	10.639	10.9247	10.2144	10.4823	10.159	10.0491	9.89609	9.70305	9.43448	11.8126	10.7296
COBS00284	10.3099	10.7402	10.4176	11.476	11.5807	10.7155	11.9322	11.1382	11.5476	10.6423	11.1431	10.936	9.81247	10.8009	10.4724	11.062	11.1695	10.9305	11.2553	11.4491	11.0229	10.207	10.6278	11.0876
COBS00285	4.00157	4.76009	4.00157	4.66402	4.72705	4.00157	4.72355	4.85579	4.00157	5.3522	4.62456	5.20339	4.44071	4.00157	4.00157	4.00157	4.58682	4.25294	4.51538	4.99172	4.367	4.00157	4.81141	4.62658
COBS00286	4.00157	4.38409	4.00157	4.87236	4.72705	4.00157	4.00157	4.78321	4.00157	5.11707	4.62456	5.11173	4.00157	4.44343	4.37999	4.27229	4.00157	4.35662	4.00157	4.32021	4.51701	4.00157	4.62342	4.56146
COBS00289	5.12576	5.38358	4.75006	6.72913	7.36557	4.00157	6.80288	5.86992	7.14981	5.75833	6.48944	6.89025	5.21259	5.41553	4.8384	5.33594	5.41201	5.10042	5.17993	5.77647	6.60879	4.00157	5.67813	6.12707
COBS00290	4.36517	5.38358	4.9838	6.36082	6.12349	4.00157	5.08996	5.19318	6.0053	5.70832	4.00157	5.96192	5.05767	4.97491	4.9158	5.15258	5.03355	4.66171	4.88249	5.79884	4.72674	4.00157	5.17658	5.58716
COBS00291	6.26236	6.05959	5.8707	6.76455	6.35106	5.74787	5.40469	5.61342	4.89811	8.53839	8.70278	7.6642	5.21259	5.35425	6.06607	5.95013	5.56907	6.36726	5.72372	6.21093	6.05311	9.86139	8.4757	8.17427
COBS00293	7.5401	8.15406	7.52241	9.76547	10.2105	9.73262	10.9293	10.5164	10.7662	8.99297	8.6272	9.91374	7.52896	7.56747	7.6543	9.67497	10.2807	9.48215	10.9351	11.0319	10.646	7.11605	8.37212	9.49421
COBS00294	8.51081	8.79359	9.13382	8.40832	7.45408	8.06874	7.58346	7.36967	6.91158	7.97956	7.73363	7.44758	8.95171	8.75735	8.97005	8.40757	8.38269	8.72751	8.11099	7.94228	7.50359	4.00157	8.60633	8.60457
COBS00295	13.5018	12.8884	12.6579	13.3392	13.9105	13.3009	13.7638	13.5914	13.9219	13.2215	13.226	13.4397	12.7645	12.965	12.7912	12.8045	12.8203	12.5923	13.099	13.2651	13.6097	13.2524	12.5324	12.79
COBS00296	6.26236	7.67296	7.0265	8.94775	7.89348	4.00157	8.03224	6.84034	6.73157	6.87102	6.63256	6.82125	6.86515	7.36857	7.23986	7.33193	7.37245	7.20741	7.9758	8.40104	7.50359	4.00157	7.65322	8.20754
COBS00297	7.8733	8.51361	8.43688	8.26217	7.11653	7.97534	7.66387	7.34398	7.10529	7.03011	7.35707	7.65118	8.48724	8.31719	8.31928	8.24988	8.25694	8.64193	8.25411	8.2264	7.1898	4.00157	8.34164	8.91169
COBS00298	8.92675	9.58271	9.79832	8.49695	7.15946	7.36307	8.10584	8.17202	7.53145	6.95283	8.01434	8.1018	10.1145	10.3164	10.0728	9.03721	9.06198	9.18487	9.3907	9.29797	8.09753	9.20668	9.04102	9.56807
COBS00299	11.3255	10.1614	10.2198	8.90438	9.34668	9.71757	10.1674	10.5492	9.72289	10.0267	9.62587	10.3778	10.7697	10.6715	10.4508	9.49545	9.49303	9.31323	10.0152	9.88176	10.5637	9.74959	9.66361	9.69046
COBS00300	10.929	10.8165	11.0023	10.4394	10.527	10.5453	11.0099	10.9102	10.9752	10.5915	10.8666	10.9151	10.8243	11.0187	10.9764	10.7952	10.979	10.8147	10.8629	10.8828	10.9182	10.3605	10.4504	10.7507
COBS00301	7.41493	7.40805	7.50487	7.43619	7.36557	8.37601	6.47948	7.22694	6.25908	6.7385	6.98969	7.14584	7.35379	7.28614	7.31283	7.42594	7.44568	7.52905	7.18241	7.40418	7.1898	4.44244	7.31365	7.18685
COBS00302	9.01504	8.91719	8.5602	8.03448	8.08768	8.15195	7.72134	7.8418	7.82516	7.44956	7.97994	7.89693	9.6554	9.46569	8.8503	8.68092	8.71782	8.6224	8.13233	7.91428	8.05878	4.00157	8.16794	8.0989
COBS00303	9.13285	7.70483	7.70995	6.19399	6.21086	7.30733	8.39701	9.21979	7.23483	7.12107	7.24493	7.63803	9.05277	8.17283	9.94071	6.0455	6.25239	6.41081	7.30114	8.84254	8.84307	4.44244	7.23223	8.45161
COBS00305	7.94121	8.43062	7.62333	9.89093	9.91988	9.09771	11.4275	11.2997	11.5921	9.83062	9.48022	10.9279	7.86317	7.66822	7.69369	9.14213	9.58127	8.86073	11.0045	11.4001	11.3337	10.581	9.33833	10.5572
COBS00306	10.7042	10.5063	10.2117	9.36013	9.5791	9.18349	9.78291	9.86824	10.2424	9.88539	9.84163	9.79519	10.8584	10.489	10.1621	9.98554	9.98903	9.94878	9.84839	9.67846	9.8589	9.31998	9.73189	9.59454
COBS00307	4.00157	4.38409	4.00157	4.98486	5.18399	4.00157	6.60987	5.6448	5.14736	4.46639	4.00157	5.65824	4.44071	4.00157	4.53523	4.27229	4.64182	4.35662	5.12777	5.16451	4.63121	4.00157	4.41045	5.3338
COBS00309	7.1573	7.47442	8.21342	7.32354	6.87966	7.8479	7.07964	7.76679	8.26171	7.34832	7.62629	8.42514	8.67874	8.56854	8.16021	7.8844	7.80277	7.9309	8.22462	8.11614	7.63779	9.13881	7.58954	8.46416
COBS00310	10.2494	10.3232	9.68307	10.1409	10.6565	9.93615	10.0005	9.94361	10.0074	9.69703	9.44296	10.0081	9.77601	10.3435	9.82556	10.1134	10.1746	10.3207	9.8723	10.375	10.0054	8.89997	9.54933	10.0741
COBS00313	5.62457	7.16504	6.33379	7.59968	9.63085	4.58417	8.13426	8.27012	8.25668	7.5177	7.55778	8.02333	6.86515	6.87879	6.75973	6.81172	6.80097	6.46127	6.98311	7.17007	7.79458	4.00157	6.6543	6.84156
COBS00314	6.09085	7.10618	6.95014	8.00572	8.18346	6.41819	7.9224	7.468	7.62843	6.27342	7.05798	7.21869	6.78756	7.13707	6.74456	6.74332	6.77962	6.8282	6.2659	7.42426	7.09358	4.00157	6.7284	7.24089
COBS00315	4.00157	4.54097	4.37895	4.57651	4.88559	5.72158	5.55651	4.70236	4.82212	4.46639	4.87603	5.06232	4.00157	4.44343	4.00157	4.46911	4.69219	4.56086	4.88249	4.63505	5.32561	4.44244	4.77775	4.95972
COBS00316	13.0809	12.9807	12.3702	13.1976	13.5642	13.5378	13.0608	12.9967	13.0846	13.3508	13.1125	13.1338	12.6252	12.3561	12.4813	12.6763	12.6635	12.5466	12.4716	12.4765	12.983	14.1408	12.8309	12.5482
COBS00318	8.92371	8.97684	9.26377	8.37503	8.12032	6.99997	8.64392	8.39128	8.57188	8.32057	8.09687	9.11877	9.54125	9.60693	9.38102	8.92573	8.94313	8.77652	8.98252	9.16814	8.4059	8.30438	8.93673	9.24968
COBS00319	14.6364	13.4147	14.0636	11.9332	11.9912	13.5238	12.1319	12.1563	12.1919	12.8322	12.7229	12.454	14.1	14.1566	13.8443	12.4889	12.3494	12.6134	12.1605	12.0401	12.0517	13.2765	12.5337	12.255
COBS00320	10.6035	10.4075	11.3141	9.92449	9.68806	10.7185	9.82479	10.0445	9.86311	10.3234	10.1689	9.98769	11.0869	11.466	11.2763	10.2815	10.2931	10.5825	9.97597	9.77208	10.0595	9.12718	10.155	9.88757
COBS00321	6.48403	6.4404	6.37422	7.66261	7.7889	6.21887	6.80288	6.81537	6.48959	6.97256	5.22066	7.16441	6.39795	6.32783	6.45712	8.0137	7.56539	8.11533	6.99496	6.66805	6.8261	4.00157	6.34984	6.53581
COBS00322	6.43195	7.14179	7.78437	8.44086	8.24394	8.50805	7.17939	6.28323	7.11656	5.42	6.08065	6.45918	7.18418	7.42097	7.62199	8.59686	8.71965	9.03056	7.77305	7.91899	6.00453	4.00157	6.06753	6.54556
COBS00323	5.99576	6.27474	5.36619	7.61885	9.55152	8.70122	9.81388	9.67084	10.344	7.92061	8.34651	9.42868	5.76085	5.97217	5.64962	8.26059	8.8475	8.01794	9.57101	9.22981	7.80801	9.89834	6.01732	8.13708
COBS00324	8.05699	8.87251	8.91387	8.94523	9.01273	8.78743	7.93862	8.29695	8.49293	7.83803	7.79436	8.1942	8.93415	8.75735	8.91142	8.65885	8.97723	8.76523	8.74051	8.38077	8.50379	4.44244	8.18091	8.14647
COBS00325	12.9745	11.6752	10.5906	8.2942	9.20463	9.06715	10.7488	10.8444	10.8401	9.85435	10.1028	10.6451	12.9796	12.4061	12.0195	8.28703	8.27702	7.87782	9.95672	9.65898	10.4868	10.9575	9.20949	9.52325
COBS00326	8.95678	9.23475	9.59736	9.95104	9.59463	9.92571	9.1256	9.25892	9.16619	8.69279	8.71326	8.73569	9.02402	9.54097	9.36655	9.86816	9.79084	9.81693	9.3572	9.39537	8.73512	9.88689	9.07147	8.96738
COBS00327	6.95494	6.67257	7.01406	6.40705	6.94275	7.76207	7.1375	7.3526	7.6048	7.77281	7.75416	7.19181	6.57203	6.14594	6.77473	7.16945	6.88984	6.73007	7.02991	6.89875	7.59962	4.44244	6.91378	6.49608
COBS00328	9.13022	8.87251	8.90725	8.63767	9.02712	9.1769	8.41447	9.38701	9.14734	9.03974	8.60486	9.43057	8.99044	8.72152	8.93123	9.14069	8.87407	9.00749	9.02867	8.77429	9.35691	9.21036	8.90976	8.52534
COBS00329	7.62535	7.14179	6.86937	7.95145	7.27116	9.22879	9.53456	9.76654	10.1152	8.60837	8.1286	10.2376	7.13839	7.50825	7.11696	7.01167	7.17626	7.56691	8.83772	9.22792	10.0312	9.80171	7.48832	9.91704
COBS00330	6.77438	6.4788	5.89973	8.32165	9.27861	8.84401	10.2889	10.4642	9.75703	8.98821	9.05551	9.72279	6.52454	6.14594	5.93278	7.45906	7.82002	7.40063	8.09478	8.84501	10.1839	9.89605	7.90909	8.68611
COBS00331	8.31111	8.04654	8.55173	7.41437	7.40164	7.39397	7.01928	7.43597	6.88536	8.0454	7.1231	7.68989	8.84301	8.61951	8.29396	7.88787	7.75691	8.08186	7.77984	7.27729	7.5444	4.44244	7.7437	7.79463
COBS00332	6.64448	6.84234	6.91034	7.16661	6.51208	7.55962	7.73999	7.68082	7.64397	6.87102	6.63256	7.88587	7.36704	7.40805	6.99505	7.59711	7.51106	7.52905	8.1217	8.21498	7.16898	4.00157	7.21961	8.40548
COBS00333	11.4573	10.9439	10.8649	10.5269	10.6831	10.7857	10.4679	10.6846	10.6966	11.3626	10.6898	10.7827	11.3021	11.0438	10.9597	10.5319	10.4161	10.285	10.1672	10.1721	10.5518	11.3159	10.9146	10.2363
COBS00334	8.29707	7.46513	8.00562	7.46478	7.94303	7.84234	7.47609	8.0976	7.74826	7.79488	7.99724	8.19867	7.86317	8.1804	7.90292	7.80595	7.56948	8.00974	7.3106	7.58143	8.11382	9.48697	7.93233	7.83398
COBS00335	13.1059	13.5197	12.7922	13.2919	13.3457	12.7052	13.4206	13.2597	13.3481	13.0923	13.1145	13.0644	12.9145	13.0137	12.9073	12.9019	12.931	12.7104	12.8086	13.3656	13.3783	13.0005	12.955	12.9252
COBS00338	5.36249	6.08533	5.8707	5.4024	5.32615	6.25424	6.02119	5.04052	4.73743	5.65612	5.22066	5.43694	5.46512	5.41553	5.53805	4.84678	4.93536	4.66171	4.88249	5.40836	5.28042	4.00157	5.78142	5.75943
COBS00341	6.56662	6.53444	7.27551	7.09491	8.13104	7.82551	7.4536	7.99195	7.70449	7.04878	7.09092	7.38587	7.05859	6.91612	6.91646	7.37724	7.1435	7.26404	7.06402	7.09656	7.89867	4.00157	6.38124	6.50612
COBS00342	10.1619	9.51058	9.30963	9.54582	10.3008	9.97463	10.0082	10.5116	10.6817	10.9892	10.7316	10.7945	9.78093	9.64291	9.63754	9.95461	9.84468	10.0591	9.81752	9.93014	10.3473	9.69026	10.4817	10.1016
COBS00343	4.00157	4.54097	4.00157	4.33497	4.95404	4.00157	4.42128	5.28301	4.73743	4.00157	4.00157	4.59162	4.44071	4.44343	4.00157	4.75966	4.00157	4.35662	5.32166	4.7744	4.81027	4.00157	4.33579	4.39871
COBS00344	4.72315	6.4788	4.91335	8.44799	8.00266	7.81986	10.4995	9.31022	10.1235	7.17294	8.61607	9.029	5.67034	5.28919	5.11245	8.10577	8.67311	7.69542	10.4162	10.4714	9.18818	4.00157	7.12337	9.36381
COBS00345	10.1976	9.69347	9.44819	9.77116	10.525	10.6716	9.6071	10.1861	9.86641	10.7698	10.4259	10.0383	9.32941	9.44388	9.63754	10.0377	10.0594	9.97907	9.47433	9.21082	9.75574	9.5229	10.0566	9.32996
COBS00346	9.19464	9.15093	8.89727	8.63767	8.41144	7.99551	8.10584	8.4241	7.9174	9.6496	9.55197	8.6633	9.16987	9.0899	8.96365	9.92469	9.18507	9.8988	8.56753	8.24523	8.41029	9.45011	9.79076	9.00906
COBS00347	7.85421	7.607	7.94212	8.00087	7.85515	7.91304	6.93998	7.7539	6.36	8.40884	8.20497	7.80599	7.77681	7.68967	7.88943	8.18948	7.87386	8.29451	7.2331	7.08815	7.52822	4.97278	8.05497	7.28725
COBS00348	9.83834	10.513	10.5455	10.4868	9.95788	10.4244	10.0043	10.0962	10.1776	10.3988	10.5154	10.2235	10.4061	10.6889	10.7162	10.9406	10.9563	11.2205	10.6664	10.5878	9.98196	9.2994	10.8127	10.7134
COBS00349	10.4325	10.3746	10.3165	6.40705	5.18399	5.84768	6.80288	7.45208	6.25908	9.32668	9.13557	7.92959	11.0588	11.3104	11.348	5.95013	5.87429	6.35838	8.07837	7.71754	8.12458	7.78667	9.59194	9.1708
COBS00350	9.19464	10.4859	9.77672	10.9461	10.3173	9.4306	10.9334	10.162	11.0031	8.18541	8.04792	9.42678	9.70796	9.87938	10.1282	10.9061	11.2509	10.8709	11.5348	11.8006	10.1877	7.98941	8.41664	10.4018
COBS00351	5.99576	7.26517	6.88316	7.09491	6.0775	5.6947	6.78475	5.6448	6.10342	6.17154	6.32938	6.31332	6.88388	6.04452	6.91646	6.28461	6.0589	6.73007	6.07105	6.14519	5.63204	4.00157	7.23223	6.95439
COBS00352	4.36517	5.83242	5.04887	5.6744	5.56353	6.16397	5.34902	4.78321	4.64053	5.11707	4.87603	5.62912	6.13462	5.58125	5.22342	5.20849	5.253	5.12628	5.55836	5.24034	5.36893	4.00157	5.96504	5.50157
COBS00354	8.14331	8.57928	8.75711	9.60434	9.11592	8.99904	6.69035	5.81743	6.25908	8.6512	9.08807	7.73993	7.73669	7.73163	8.68895	8.08782	8.3404	8.71416	5.78392	6.58573	5.95402	9.94983	9.42248	8.31409
COBS00356	4.00157	4.00157	4.00157	4.00157	4.36716	4.33945	4.42128	4.92207	4.00157	6.022	5.58241	4.00157	4.00157	4.00157	4.00157	4.00157	4.00157	4.00157	4.00157	4.32021	4.00157	4.00157	4.00157	4.00157
COBS00357	10.947	11.5445	10.9119	13.0935	13.2283	12.9543	12.2595	11.9083	12.1691	11.1565	11.4092	11.7576	10.6539	10.7873	11.1721	11.9843	11.9678	11.9176	11.28	11.6778	11.9213	10.9706	10.629	11.2634
COBS00358	5.51965	6.11057	5.71424	7.38473	7.33791	6.53631	6.25671	5.81743	6.36	5.54418	6.01026	5.89273	5.28168	5.93439	6.11573	6.17052	6.18733	6.02565	5.72372	5.75368	5.78899	6.1418	5.69154	5.81175
COBS00360	4.94899	6.20688	5.92811	8.12638	7.67604	6.47854	6.92356	5.94473	5.92641	5.80636	5.22066	5.56859	5.40739	5.72605	5.96058	6.59539	6.63617	6.51786	6.20412	6.4454	5.56291	4.00157	6.06753	6.61194
COBS00361	4.00157	6.05959	5.92811	8.44086	6.78622	4.00157	6.52435	5.36559	6.0053	4.79992	5.35526	5.01005	5.96153	5.14504	6.09114	5.87731	5.87429	5.96686	5.40639	6.16194	4.88522	4.00157	6.02752	6.70151
COBS00363	6.04418	6.78299	6.11074	8.90179	9.09695	6.91668	8.61905	6.95887	7.21405	6.3057	7.83345	7.25374	6.61793	6.24002	6.23217	6.32763	6.75064	6.51786	5.92261	6.41824	7.13716	9.38326	6.76985	7.05877
COBS00364	5.22726	4.66032	4.83614	5.70102	5.28094	4.00157	4.00157	4.00157	4.52469	4.46639	4.87603	4.59162	4.44071	4.44343	4.53523	4.46911	4.7389	4.82511	4.51538	4.70844	4.00157	4.00157	4.96043	4.95972
COBS00365	9.39873	9.67559	9.22174	11.6121	11.8613	11.6887	11.088	10.5976	10.7662	9.8065	9.58655	10.3349	8.59179	8.84082	9.26358	9.78363	10.1531	10.1743	9.19471	9.80915	10.3598	10.2434	9.05046	9.68726
COBS00366	5.44388	6.62239	6.11074	7.87395	7.16999	4.00157	6.40926	5.79032	5.61979	4.00157	6.5865	5.86878	5.96153	5.72605	6.276	5.75108	6.31441	6.29449	5.75419	6.76712	5.56291	4.00157	6.34984	6.50612
COBS00368	4.36517	4.00157	5.04887	4.33497	4.72705	4.00157	5.95491	4.00157	4.00157	5.02391	5.0648	4.59162	4.00157	4.44343	4.37999	4.38387	4.00157	4.00157	4.51538	4.00157	4.72674	4.00157	4.33579	4.4872
COBS00369	4.62807	4.54097	4.75006	5.13009	4.88559	4.00157	4.72355	5.04052	4.37248	5.02391	4.87603	5.11173	4.00157	4.62407	4.65334	4.60343	4.64182	4.86071	4.36585	4.32021	4.51701	4.00157	4.77775	4.87883
COBS00370	4.00157	4.00157	4.00157	4.33497	4.36716	4.33945	5.22791	4.78321	4.00157	5.70832	5.47464	4.75988	4.00157	4.00157	4.00157	4.27229	4.00157	4.00157	4.00157	4.55127	4.51701	4.00157	4.00157	4.28283
COBS00371	4.00157	4.38409	4.37895	4.80946	4.88559	4.00157	4.00157	4.00157	4.00157	5.11707	5.35526	4.00157	4.00157	4.00157	4.00157	4.38387	4.37323	4.35662	4.00157	4.00157	4.00157	8.49164	4.70516	4.78856
COBS00372	4.00157	4.54097	4.75006	4.74063	4.88559	4.00157	5.50816	4.00157	4.00157	5.02391	4.62456	4.75988	4.44071	4.00157	4.53523	4.60343	4.45613	4.66171	4.36585	4.45129	4.00157	4.00157	5.03839	4.78856
COBS00374	4.00157	4.76009	4.37895	5.29445	5.23364	4.00157	4.92743	4.70236	4.73743	4.65614	4.00157	5.36471	4.62026	4.44343	4.00157	4.80452	4.45613	4.56086	4.80775	4.32021	5.01687	4.00157	5.11005	4.92028
COBS00378	4.00157	4.99675	4.00157	5.4024	5.28094	4.00157	5.16141	5.58118	4.37248	6.022	4.87603	5.06232	4.00157	4.00157	4.53523	4.27229	4.78259	4.61349	4.00157	4.45129	4.51701	4.00157	5.17658	5.06816
COBS00379	4.00157	5.0626	4.00157	4.87236	4.36716	4.00157	4.00157	4.00157	4.00157	5.02391	4.00157	4.48445	4.00157	4.44343	4.00157	4.00157	4.45613	4.35662	4.00157	4.00157	4.00157	7.78667	4.47319	4.28283
COBS00380	4.62807	4.00157	4.53377	5.08422	5.07627	4.33945	6.14427	4.85579	5.61979	5.48382	5.85654	5.20339	4.75649	4.62407	4.53523	4.60343	4.58682	4.50244	4.36585	4.32021	4.00157	4.00157	5.29745	4.92028
COBS00381	4.00157	4.00157	4.37895	4.00157	4.00157	5.04931	5.64749	5.36559	4.00157	5.75833	4.00157	4.48445	4.00157	4.00157	4.00157	4.27229	4.00157	4.00157	4.00157	4.00157	4.51701	4.00157	4.23816	4.28283
COBS00383	4.00157	4.00157	4.00157	4.80946	4.72705	4.00157	4.83244	4.00157	5.2506	5.11707	5.22066	4.59162	4.44071	4.00157	4.37999	4.27229	4.00157	4.25294	4.36585	4.45129	6.33108	4.44244	4.47319	5.06816
COBS00390	6.26236	6.03332	5.89973	6.57758	6.57792	7.18878	6.30953	6.2261	5.92641	7.37799	6.76212	7.25374	6.13462	5.63152	5.64962	6.05856	6.1649	6.19752	5.92261	6.12822	6.23101	4.00157	6.93466	6.3804
COBS00391	4.00157	4.00157	4.53377	4.98486	4.00157	4.00157	4.59308	4.00157	5.03153	5.54418	4.00157	4.75988	4.44071	4.00157	4.37999	4.38387	4.00157	4.98896	4.62923	4.55127	4.00157	8.86771	5.59431	5.1338
COBS00392	4.00157	4.54097	4.37895	4.98486	4.00157	4.00157	5.01248	4.00157	4.00157	5.6015	5.58241	4.75988	4.44071	4.00157	4.65334	4.65994	4.26473	4.43587	4.80775	4.00157	4.00157	4.00157	5.74372	5.1338
COBS00393	4.94899	5.12398	5.16646	6.62998	4.51723	5.87142	4.00157	5.14499	4.82212	6.87102	6.95426	6.22481	4.44071	4.44343	4.98643	5.87731	5.60516	6.70958	5.36487	6.00278	4.51701	4.00157	8.20652	7.33765
COBS00394	8.3479	6.03332	7.01406	7.25958	6.16791	9.07426	5.84845	6.42456	5.5099	10.4756	9.98244	8.46274	6.57203	5.14504	6.11573	6.15855	5.00205	7.22178	5.89609	6.52374	7.03713	10.9641	9.71937	8.33885
COBS00395	4.94899	4.92543	4.75006	5.08422	5.01729	6.08697	4.00157	4.92207	4.00157	7.43553	6.53884	6.20637	5.05767	4.44343	4.8384	4.38387	4.58682	4.92735	4.36585	4.7744	4.81027	4.00157	6.19857	5.54516
COBS00396	5.51965	5.33666	4.00157	6.19399	4.51723	6.21887	7.06479	4.35454	4.89811	5.20178	4.87603	4.68136	8.14151	4.00157	4.7521	7.10485	4.7389	4.43587	8.97075	5.03811	4.72674	4.75941	4.84358	4.92028
COBS00397	6.09085	5.62952	5.71424	5.50051	5.66578	4.00157	4.72355	5.40459	4.52469	7.08539	7.40997	6.5768	5.46512	4.62407	4.8384	4.65994	4.86276	5.10042	5.27658	5.58066	5.1835	4.44244	8.28671	7.26426
COBS00400	4.72315	4.92543	4.00157	4.80946	4.51723	4.00157	5.22791	5.28301	5.38807	5.65612	4.00157	5.36471	5.21259	4.00157	5.16953	4.54066	4.64182	4.74829	4.72447	4.7744	4.367	4.00157	5.23884	4.95972
COBS00406	5.17783	4.00157	4.37895	4.00157	4.00157	4.00157	4.83244	4.00157	4.00157	5.02391	4.87603	4.00157	4.00157	4.00157	4.00157	4.27229	4.37323	4.00157	4.00157	4.45129	4.63121	4.00157	4.52828	4.39871
COBS00410	9.76728	10.4848	10.2449	9.72355	9.06106	9.54245	9.15702	9.16752	9.00201	9.87254	9.94295	9.2405	10.4219	9.78097	9.93255	9.03566	9.34311	9.25221	9.0484	8.94496	9.25562	10.3835	10.4088	9.84028
COBS00413	9.18959	9.16524	9.41594	9.42291	9.28101	8.99654	8.47675	8.77185	8.77163	9.12462	8.54742	8.99864	9.1885	9.22025	9.42591	9.67397	9.53731	9.57917	9.09252	8.90534	8.79684	4.87342	9.0481	8.72416
COBS00414	12.4011	11.5363	11.3961	10.0781	11.2789	11.6837	11.1404	11.626	11.6506	11.758	11.3434	11.6257	11.767	11.6335	11.3963	10.8899	10.7882	10.7414	10.5791	10.5693	11.5524	10.7534	10.9672	10.4932
COBS00415	13.01	12.477	12.6975	10.8188	10.809	12.1499	11.1526	11.264	11.056	11.5558	11.0717	11.3293	13.0302	13.2504	12.9044	11.4106	11.4292	11.8518	11.1871	11.0974	11.2301	11.6563	11.1384	11.1396
COBS00416	6.95494	7.93029	8.09005	8.53092	6.95503	7.36307	6.22949	6.58262	6.76083	5.98173	6.01026	6.68507	7.60906	7.84104	8.53769	9.20576	9.17576	9.06382	8.3931	8.42434	6.40605	4.00157	7.48131	7.5564
COBS00417	9.91678	9.91451	10.0244	9.97834	10.2588	10.9414	10.0177	10.1239	10.1709	9.5754	9.52845	10.0543	10.2142	10.4935	10.3155	10.4613	10.398	10.3376	10.3756	10.2997	10.4711	10.1021	9.7609	9.89499
COBS00418	10.2567	9.56123	9.93134	8.9275	9.06106	9.29925	9.01943	9.07768	9.21356	9.43207	9.33183	9.41342	9.83864	10.3368	10.1746	9.27594	9.31674	9.301	8.9439	9.05343	9.1361	10.2271	9.54516	9.07268
COBS00419	7.1362	7.81107	7.44172	8.79407	8.91092	8.22206	8.03978	7.22694	7.41832	5.6015	6.01026	6.89025	7.48108	8.25402	8.27338	7.97189	8.50684	7.84439	8.32991	8.29666	7.65278	4.00157	6.03764	7.28154
COBS00422	5.80992	7.3885	6.50685	9.46037	9.93062	8.51504	9.90095	8.49145	9.07793	6.61742	7.32986	7.6771	6.06816	6.41021	6.6661	8.81216	9.46601	8.47771	9.53551	9.71125	8.4059	4.00157	6.97046	8.20155
COBS00423	4.00157	4.00157	4.00157	4.93054	4.95404	4.00157	5.34902	4.85579	4.00157	4.00157	4.00157	4.34381	4.44071	4.00157	4.00157	4.71169	4.69219	4.50244	4.88249	4.70844	4.63121	4.00157	4.62342	4.73885
COBS00424	5.40395	4.84726	4.37895	4.74063	5.23364	6.6836	4.59308	5.36559	4.00157	6.51219	4.00157	5.06232	5.05767	4.87534	4.37999	4.75966	4.69219	5.04643	4.80775	4.32021	5.36893	4.00157	5.25876	4.78856
COBS00425	4.62807	4.84726	4.65157	5.59073	5.13166	6.21887	4.59308	4.85579	4.00157	5.11707	5.22066	5.20339	5.13829	4.7611	4.8384	4.46911	4.52574	5.50451	4.36585	4.83471	5.07583	4.00157	4.70516	4.68519
COBS00428	11.8659	8.55337	10.1709	8.70466	7.63886	10.3027	8.31879	9.13325	9.1061	13.7359	12.746	11.7428	9.77108	9.32962	9.27654	7.17518	7.09288	8.47375	8.40629	8.34632	9.65206	14.5989	13.3222	11.9754
COBS00429	5.62457	5.70104	5.22022	5.87255	5.56353	4.00157	5.69046	5.94473	5.75188	4.46639	5.35526	6.31332	5.57231	5.28919	4.53523	5.12336	4.93536	5.17595	5.89609	6.02147	6.25164	4.00157	5.42262	5.58716
COBS00432	5.31935	7.37862	6.54247	9.31215	6.47792	5.7988	6.28338	5.51384	5.5099	7.0672	5.85654	6.53388	6.78756	6.56123	6.37963	11.662	10.1436	11.6499	6.83248	6.69069	5.78899	8.84894	7.84249	7.21112
COBS00433	11.2409	9.92968	10.819	9.56559	9.30717	9.8463	10.3231	10.5886	10.678	10.6148	10.5883	10.4449	10.6726	11.4395	9.96812	9.66896	9.70287	9.87203	10.0891	10.1672	10.4837	10.623	10.6474	10.5902
COBS00434	12.4036	12.5252	12.4742	12.5097	12.7093	12.7162	11.8965	11.9998	11.9672	12.468	12.481	12.0534	12.3882	12.1267	12.394	12.3764	12.2794	12.3775	11.5273	11.3984	11.844	11.759	12.3029	11.4466
COBS00435	4.72315	6.29661	4.83614	6.39182	5.78968	4.00157	5.77203	5.58118	6.10342	5.02391	5.77192	5.81946	5.99807	5.67973	5.45709	4.92491	5.30095	5.17595	6.04748	5.73045	5.45065	4.00157	5.73089	5.66683
COBS00436	4.72315	5.92249	4.53377	5.77751	5.90213	4.00157	5.73194	5.94473	6.07958	5.20178	5.47464	6.12991	5.84507	5.41553	4.9158	4.65994	5.14959	4.98896	5.66034	5.58066	6.33108	8.50369	5.48813	5.4562
COBS00439	12.928	12.5659	12.9169	11.5394	12.008	11.216	12.2482	11.9163	11.9184	11.4757	11.5132	11.7801	12.8866	13.515	12.8975	11.2095	11.341	11.0432	11.58	11.7792	12.2298	12.4923	11.3378	11.9668
COBS00440	6.50096	6.18346	5.8707	6.37641	7.11653	4.00157	7.22007	6.77705	6.60786	5.70832	5.58241	6.11007	5.99807	6.48782	5.81495	5.42776	5.77063	5.45011	6.02347	6.12822	6.49424	8.44237	6.24235	6.0014
COBS00441	4.80628	6.11057	4.75006	6.1019	5.18399	4.00157	5.22791	4.49951	4.89811	4.00157	6.01026	4.75988	5.46512	4.97491	4.7521	4.60343	4.96936	4.50244	5.40639	5.84239	4.81027	4.00157	5.86512	6.10018
COBS00442	8.2148	8.79359	7.21185	8.29815	7.9308	8.6354	8.71606	8.42004	8.77163	9.14187	8.83341	8.73875	8.19419	7.07272	7.12858	7.32166	7.18701	7.60014	8.27344	8.16839	8.2129	7.33624	8.03842	7.95662
COBS00443	7.1573	7.00654	6.03564	6.69279	6.8536	7.40159	7.37198	7.45208	7.47166	7.73904	6.91789	7.6642	6.47532	5.63152	5.71851	5.87731	6.07112	6.13571	6.4878	6.54887	7.55242	4.00157	6.41949	6.54556
COBS00444	6.11356	7.7205	6.13483	6.76455	5.69798	5.63905	5.98848	5.79032	6.10342	6.24033	6.95426	6.68507	6.86515	5.89544	5.87526	6.07149	6.39284	5.94256	6.89724	7.07118	6.67017	4.00157	6.8492	6.7442
COBS00446	5.31935	6.33929	5.74719	6.74104	6.36993	5.34843	6.63044	5.89536	5.75188	5.94014	5.93575	5.68666	6.37114	6.11301	5.93278	5.73434	5.99601	5.71421	6.04748	6.28873	5.48933	4.00157	6.43449	6.50612
COBS00448	9.2221	10.0777	9.54081	10.6654	11.0595	10.2607	10.4226	9.96185	10.4466	11.4456	11.2726	10.4533	9.42044	9.0158	9.48292	10.8311	10.9478	10.5631	10.9404	10.9553	10.1116	10.2089	11.7275	11.1176
COBS00449	5.59065	5.18159	5.16646	4.57651	4.63148	4.00157	4.00157	4.70236	5.34422	7.0672	6.38488	6.00603	4.75649	4.00157	4.37999	4.60343	4.64182	4.70643	4.80775	4.7744	4.95364	4.00157	5.66457	5.3338
COBS00452	4.51443	5.70104	5.04887	7.3922	6.5939	4.00157	7.57308	5.61342	5.87093	4.65614	4.62456	5.15866	4.75649	5.06398	4.8384	5.61009	6.1649	5.4123	6.73642	6.87929	5.7592	4.00157	5.48813	6.20455
COBS00453	10.672	10.3271	11.0162	9.92194	9.97133	10.908	9.98889	10.8231	10.0731	12.631	11.8256	10.361	10.6146	11.0386	10.784	10.1222	10.0702	10.167	9.98623	9.96567	10.171	9.09171	10.0907	10.2616
COBS00454	9.44395	8.68248	9.4775	8.61884	9.17652	10.1741	8.71136	8.95407	8.83698	9.14187	8.87133	8.94923	9.49713	9.89783	9.36169	8.82663	8.8391	8.97288	8.37085	8.29305	9.05988	9.54054	8.68877	8.13079
COBS00455	4.80628	5.23597	5.04887	7.87395	4.36716	8.06398	4.00157	4.00157	4.37248	5.42	4.00157	5.36471	5.34641	4.87534	4.53523	5.09319	4.93536	8.22078	4.72447	4.45129	4.367	4.00157	5.13275	4.87883
COBS00456	9.20718	9.39148	9.43216	9.39371	9.03568	8.56305	9.20122	9.37659	9.69165	8.67511	8.9881	9.4419	9.57277	9.56426	9.27395	9.68492	9.67767	9.48608	9.9906	9.81545	8.96752	9.23946	9.26323	9.4047
COBS00457	10.6909	10.4836	10.406	10.1713	10.5639	10.5656	9.85489	10.3801	10.4499	10.6856	9.9781	10.1802	10.3998	10.0905	10.4791	10.3834	10.3539	10.3715	10.0308	9.87333	10.5268	9.33016	10.3806	9.85082
COBS00458	12.3287	12.7993	12.4357	11.9839	12.1866	11.1339	12.1209	11.7571	11.7059	13.4259	13.0699	11.9819	12.705	12.0055	11.8579	11.4231	11.5637	11.1327	11.7782	11.6286	11.681	13.4721	12.9958	12.0936
COBS00460	6.2823	5.0626	4.75006	5.13009	6.52884	7.10694	6.2017	6.82791	6.63985	6.022	6.48944	6.4123	5.13829	4.87534	4.8384	4.84678	5.03355	5.04643	5.01375	4.7744	5.69732	4.00157	4.96043	4.99739
COBS00461	4.00157	5.12398	4.53377	5.36762	5.28094	4.00157	6.28338	4.60994	4.00157	4.91966	5.0648	4.59162	5.34641	5.21973	4.7521	5.18094	5.09339	4.89473	5.32166	5.31083	5.63204	4.00157	5.23884	5.38445
COBS00462	9.04051	8.46346	8.26098	8.87824	9.17394	9.52007	8.62905	8.95967	9.03168	8.49201	8.46296	8.40982	8.59179	8.65794	8.34908	9.385	9.17042	9.25567	9.0512	9.09752	8.41029	9.65561	8.16576	8.48895
COBS00463	8.4986	7.06964	7.59877	6.75284	8.26355	9.50962	8.13426	8.42815	8.5433	8.94464	8.15964	8.42894	7.41886	7.07272	7.38223	6.82647	6.78677	7.20741	6.66346	6.4454	8.02472	5.28644	7.14583	6.76091
COBS00464	8.91455	8.84431	9.23765	8.10847	8.21402	9.31334	7.85563	8.57051	7.9427	9.68826	8.8525	8.86477	9.4046	8.98592	8.80805	8.17822	8.14392	8.30347	7.52047	7.69023	8.6743	10.27	8.82291	8.31131
COBS00465	4.00157	4.76009	4.37895	5.03593	5.72933	5.94003	5.92042	6.82791	6.54154	6.09893	6.48944	6.22481	4.87008	4.87534	4.65334	4.96131	4.93536	5.04643	5.69245	5.70676	6.35022	4.62267	5.45586	5.4089
COBS00466	8.14853	7.79637	7.14517	6.42212	6.18956	4.00157	9.54778	9.44404	9.46039	7.95039	7.5102	8.75701	7.87245	7.76231	7.57209	6.95931	6.67539	6.23717	8.95291	8.84501	9.50794	5.06167	7.72013	8.60684
COBS00467	6.22154	7.06964	6.79827	8.47268	7.61608	8.22206	6.47948	5.2391	5.75188	5.54418	6.63256	5.71442	6.22835	7.0394	7.25052	8.94077	8.05653	9.05591	7.1405	6.34785	5.01687	4.87342	6.22501	5.95661
COBS00468	4.00157	4.54097	4.83614	5.59073	5.32615	4.00157	4.00157	4.00157	4.89811	4.00157	4.87603	4.48445	4.00157	4.7611	4.7521	5.35964	5.06397	5.72889	4.51538	4.7744	4.367	4.00157	4.77775	4.4872
COBS00469	4.80628	5.28755	4.83614	5.56144	5.18399	4.00157	5.34902	6.3733	6.10342	5.70832	5.58241	6.1687	5.13829	5.21973	5.05165	4.88682	4.89988	4.70643	5.55836	6.02147	6.60879	4.44244	6.09675	6.07273
COBS00470	4.88089	5.18159	4.53377	5.50051	5.59862	4.00157	6.33517	6.55245	6.17241	5.65612	5.93575	6.39631	4.62026	4.7611	4.00157	4.99619	5.14959	4.78773	6.13929	5.92515	6.21005	4.00157	6.03764	6.01599
COBS00471	8.72854	4.84726	4.53377	6.0232	5.56353	4.00157	9.07897	5.92029	6.30037	6.48456	8.17491	5.89273	5.96153	4.44343	4.65334	6.63811	5.22814	4.78773	9.0651	5.94501	5.97953	9.82828	5.99666	5.86194
COBS00472	4.62807	4.84726	4.37895	4.80946	5.48993	4.33945	5.81083	6.53711	6.34042	4.79992	5.47464	6.48956	4.62026	4.44343	4.37999	4.60343	4.89988	4.74829	5.62733	5.4688	5.97953	4.00157	5.59431	5.77712
COBS00473	5.01193	5.0626	4.37895	5.29445	5.18399	4.99763	5.69046	5.58118	5.68767	4.00157	5.47464	5.98417	4.96909	4.62407	4.53523	4.88682	4.82376	4.35662	5.92261	5.49782	5.63204	4.00157	5.35292	5.38445
COBS00474	4.36517	4.99675	5.10952	5.59073	5.63268	4.00157	6.6507	6.98141	7.04759	7.31801	6.98969	6.45918	5.05767	4.7611	5.16953	5.23529	5.12191	4.98896	5.81293	6.37645	6.78529	4.44244	5.94351	6.34704
COBS00475	5.22726	5.38358	5.04887	5.56144	5.69798	6.18252	6.43308	7.2363	5.89898	8.16018	8.76455	6.83299	5.76085	4.62407	4.53523	5.38283	4.96936	4.98896	7.96394	6.36223	6.79902	6.71374	5.93261	6.34704
COBS00476	6.09085	5.0626	6.13483	12.3052	5.75988	4.00157	8.34331	6.50589	6.17241	6.39811	6.72027	6.73616	14.0687	5.14504	4.37999	13.2075	5.78598	5.77189	16.1131	6.65659	6.56087	9.00116	6.07734	6.17923
COBS00477	6.32132	6.20688	6.50685	6.13952	6.38855	4.00157	7.54148	8.10268	8.47142	7.47721	7.46097	8.44781	6.61793	6.87879	6.04051	5.79995	5.98305	5.84035	7.37508	7.2247	8.08105	4.75941	6.7344	7.22906
COBS00478	9.32468	8.86901	9.94915	7.42896	7.2515	7.90772	9.87181	9.64848	9.78342	8.54489	8.29156	9.64656	9.46389	10.9207	9.09531	8.37837	8.78587	7.86272	9.93115	9.85144	9.69047	4.00157	8.57231	9.6194
COBS00479	4.00157	5.18159	4.65157	4.98486	4.95404	4.00157	5.60289	5.04052	4.00157	5.94014	6.08065	5.62912	4.75649	4.44343	4.53523	4.75966	4.78259	4.70643	4.51538	5.03811	4.63121	4.00157	5.48813	5.1338
COBS00480	5.27434	5.51326	5.95586	6.48074	6.70078	5.23114	7.82104	7.58204	7.40924	8.24261	6.98969	7.24506	6.10181	5.93439	5.61361	6.82647	6.80097	6.18742	7.51232	7.64543	7.03713	7.71562	5.94351	6.66638
COBS00481	5.83823	7.33841	6.18172	10.1109	10.6894	8.92492	10.0328	9.17235	9.86805	7.84862	8.08074	8.61071	6.47532	6.41021	6.6661	9.45182	10.1639	9.38235	10.0051	10.2762	9.38172	4.00157	7.67485	9.04956
COBS00482	5.12576	4.99675	4.53377	5.17383	4.88559	4.00157	4.42128	4.60994	4.00157	4.79992	5.58241	4.59162	4.75649	4.44343	4.53523	4.71169	4.37323	4.70643	4.88249	4.89054	5.48933	4.00157	5.29745	4.87883
COBS00484	4.00157	4.76009	4.00157	5.36762	5.78968	4.00157	4.00157	4.35454	5.61979	4.46639	4.00157	5.28722	4.62026	4.44343	4.65334	5.02971	5.14959	4.66171	5.22942	5.4688	5.59799	4.00157	4.66564	5.06816
COBS00487	11.9301	12.3553	11.8151	6.64278	5.56353	7.07857	10.6082	10.524	10.6245	10.6423	10.9353	11.6523	12.6633	12.4157	11.9444	7.3268	6.17616	7.12306	10.1187	10.3229	10.5862	11.6146	11.2187	11.6988
COBS00488	13.2728	12.4568	11.2838	11.1138	10.0621	11.9932	14.3293	15.2338	15.2076	13.0792	13.0244	14.3062	11.7732	11.8431	11.9428	11.2352	11.5216	10.234	14.5598	14.5934	15.3804	13.7462	12.2186	13.5569
COBS00489	7.02569	7.67296	7.31641	9.90393	10.465	9.36449	10.8137	10.5492	10.9231	8.76697	9.33183	9.85991	7.07491	6.801	7.03275	9.3085	9.67106	9.05061	10.0435	10.4211	10.2984	9.94983	8.82429	9.53518
COBS00490	4.00157	4.76009	4.00157	6.29659	6.51208	4.00157	6.2017	6.16638	6.85864	4.79992	4.62456	5.36471	4.44071	4.87534	4.37999	4.80452	5.03355	4.74829	5.62733	6.30376	5.63204	4.00157	5.27829	6.07273
COBS00491	4.00157	4.66032	4.37895	5.59073	5.63268	4.00157	6.1733	4.98335	5.34422	4.00157	4.87603	4.75988	4.62026	4.44343	4.53523	4.80452	5.09339	4.50244	4.80775	5.37683	4.63121	4.00157	4.90414	5.47912
COBS00493	4.00157	4.66032	4.83614	6.52309	6.78622	4.00157	7.68329	6.45769	6.10342	4.65614	5.58241	5.50469	4.62026	4.44343	4.37999	5.18094	5.12191	4.92735	5.59336	6.4454	5.90141	4.44244	5.21852	6.05878
COBS00496	6.70373	5.38358	5.31979	4.80946	5.63268	6.00509	5.29025	5.51384	4.89811	7.01119	6.72027	6.42811	5.46512	4.62407	4.98643	4.99619	5.14959	5.17595	4.72447	5.03811	5.92799	8.40428	5.35292	5.43281
COBS00497	4.00157	4.54097	4.00157	5.13009	6.05388	4.00157	5.60289	5.19318	4.52469	4.46639	4.00157	5.01005	4.00157	4.00157	4.00157	4.99619	4.89988	4.56086	5.17993	4.7744	5.01687	4.00157	4.66564	4.68519
COBS00498	4.94899	4.99675	4.37895	5.72706	6.02981	5.23114	6.82078	6.338	6.0053	5.27975	5.0648	5.79404	4.44071	5.14504	4.65334	4.96131	5.253	4.92735	5.52226	5.52611	6.18876	4.00157	5.17658	5.28059
COBS00499	4.62807	4.84726	4.53377	4.74063	4.95404	4.00157	4.00157	4.49951	4.00157	5.54418	5.85654	4.95444	4.75649	4.00157	4.37999	4.60343	4.52574	4.43587	4.36585	4.32021	5.1835	4.00157	4.93277	4.73885
COBS00500	4.36517	4.38409	4.53377	5.29445	5.78968	4.00157	6.80288	6.2065	4.89811	5.11707	5.47464	5.62912	4.44071	4.00157	4.53523	4.75966	4.86276	4.66171	5.07255	5.49782	6.05311	8.41709	4.77775	4.92028
COBS00501	9.98099	9.7033	10.6718	5.93933	5.95476	6.88412	11.143	11.656	11.1057	10.022	10.1028	11.285	9.77108	10.8991	10.2605	8.02318	7.96036	7.07628	9.27824	9.0913	11.0969	10.6271	9.44232	10.4244
COBS00502	4.00157	4.00157	4.00157	5.08422	4.36716	8.01046	4.42128	4.49951	4.89811	4.00157	4.00157	4.00157	4.62026	4.00157	4.00157	4.54066	4.00157	5.9052	4.00157	4.00157	4.00157	4.00157	4.23816	4.00157
COBS00503	4.88089	4.00157	4.00157	4.00157	4.81061	5.6102	4.00157	4.00157	4.00157	4.46639	4.00157	5.06232	4.00157	4.00157	4.00157	4.00157	4.00157	4.35662	4.36585	4.00157	4.51701	4.00157	4.23816	4.00157
COBS00505	6.82841	7.74369	8.20263	9.73086	9.05826	9.74604	7.87262	6.97019	6.47183	7.75039	7.55778	7.45511	7.3269	7.30022	7.72444	11.4326	9.91107	11.2343	7.52047	7.38381	6.63982	7.51479	7.68097	7.58442
COBS00506	6.13588	7.06964	6.39398	8.36375	8.29246	5.84768	6.93998	6.47395	6.21646	6.33722	6.38488	6.79747	6.95641	6.26994	6.35954	10.9108	8.92895	10.5255	6.95911	6.72397	6.40605	8.04005	7.23223	7.40741
COBS00508	4.72315	4.38409	4.00157	8.04865	4.81061	10.4772	4.42128	4.98335	4.37248	4.46639	4.62456	5.32668	4.75649	4.44343	4.53523	5.06201	4.45613	8.48756	5.81293	4.55127	4.63121	4.44244	4.84358	4.62658
COBS00509	7.03714	6.62239	6.11074	8.83269	8.73278	8.15643	10.6456	9.68442	10.5608	8.79996	8.74426	8.99608	5.88511	5.67973	6.39943	8.17256	8.40794	8.07664	9.88332	10.3352	9.69767	4.00157	7.04422	8.8914
COBS00510	4.88089	6.00651	5.68037	6.59087	6.18956	5.18881	6.22949	7.96985	6.41707	12.3731	12.5075	6.27862	5.76085	5.72605	5.68457	5.9359	5.36897	5.6536	5.97405	8.55372	9.7084	11.6325	6.26794	12.341
COBS00511	4.36517	4.38409	4.83614	5.36762	5.32615	4.00157	6.43308	6.06033	6.68647	4.79992	4.87603	5.74155	4.00157	4.00157	4.65334	4.84678	4.86276	4.89473	6.20412	6.30376	6.31166	4.00157	4.66564	5.30754
COBS00512	9.83025	8.9638	9.24553	8.82997	10.0537	11.7173	10.2327	10.7006	10.7214	10.9222	10.8382	10.752	9.43922	9.19809	9.06873	9.58853	9.57623	9.76774	9.4909	9.13023	10.6225	9.47784	8.99166	9.29811
COBS00513	6.30195	7.53783	7.49602	8.21274	8.72574	8.15643	7.50916	7.36967	6.97505	6.6425	6.76212	6.71085	7.40608	7.35516	7.34299	9.01528	8.1817	9.10914	7.86531	8.12837	7.25049	4.00157	7.24059	7.9387
COBS00514	8.19977	8.85848	8.49986	8.37503	8.19372	9.15472	7.68329	7.8418	7.46291	8.03618	7.90857	7.63142	8.3146	8.33086	8.89133	8.42671	8.55076	8.70575	7.92162	7.75491	8.2129	9.60343	8.06901	7.99873
COBS00515	11.5601	11.8169	12.6569	7.48585	5.48993	9.70237	12.1528	13.2162	12.3509	12.5542	12.1202	13.4465	12.5798	13.3607	13.1334	6.51496	12.2328	11.3765	13.9789	13.1731	14.2525	13.2308	13.2749	15.3178
COBS00516	11.6864	10.0016	11.0675	9.70435	10.3599	11.339	10.012	10.4121	10.5238	10.6332	10.184	10.2527	11.0167	11.3035	10.7143	10.5007	10.3162	10.4917	9.858	9.67984	10.3404	10.7622	10.0211	9.60702
COBS00517	10.5601	10.0594	10.1332	10.0063	10.1276	9.96702	10.257	10.3967	10.2787	10.7986	10.8286	10.5489	10.3023	10.2353	10.0044	10.1648	10.2626	10.3096	10.3944	10.3343	10.4595	10.9835	11.065	10.4365
COBS00518	11.6656	11.3353	12.0723	10.607	10.4491	11.7584	10.1362	10.5548	10.8459	11.1554	10.6303	10.7026	11.7358	11.7396	11.8292	10.8877	10.9313	11.0101	10.6499	10.3664	10.4521	11.5148	10.856	10.7055
COBS00519	10.6529	11.4254	12.0193	11.0678	10.3542	11.0177	10.0552	9.56465	9.47342	10.1361	10.5826	9.80691	11.7281	12.6315	11.7277	11.5844	11.7561	11.7985	11.0506	10.473	9.55826	10.9097	11.3767	10.8923
COBS00520	8.40137	8.70226	8.4137	10.958	10.2305	10.8636	8.55229	7.3949	7.86542	7.54406	8.17491	7.84077	8.36795	8.44836	8.16581	10.2776	10.4441	10.594	8.62878	8.70808	7.39167	7.99798	7.90388	8.10854
COBS00521	4.36517	4.99675	5.68037	8.08117	7.10559	11.2498	8.05472	8.76547	6.76083	9.96503	10.3408	7.47005	4.44071	4.7611	5.36972	10.0918	10.9583	11.0412	7.93384	8.06192	8.27695	4.00157	8.13052	8.61587
COBS00522	7.0025	8.36258	8.46421	10.8554	8.66446	11.2623	10.7176	11.3431	10.5006	8.74455	8.21977	10.9877	7.72648	8.41667	8.58016	9.40079	9.05909	10.7827	10.1787	9.13427	11.2264	4.00157	8.93546	11.4583
COBS00523	7.3616	9.07108	7.70229	10.7179	9.17135	10.3725	11.174	11.0367	10.9365	9.71442	9.21878	10.767	8.32813	7.22839	7.59726	8.25525	8.67689	8.88029	9.4299	9.85633	11.6307	10.5082	9.14379	10.5127
COBS00525	12.4168	12.917	13.318	15.6359	15.0788	15.7832	10.5905	8.48369	9.06937	8.03618	8.41236	9.27044	11.3541	13.053	13.362	14.8688	14.8952	15.3298	8.7125	8.82265	8.4578	9.51994	7.04422	8.64482
COBS00527	10.49	8.82279	10.5895	9.26051	9.5791	9.5218	10.012	10.6659	10.9474	10.6484	10.7367	10.8323	10.5783	12.2623	8.37345	9.962	10.2128	10.0431	11.0422	10.3638	10.8576	9.92543	10.903	10.8137
COBS00528	8.1328	6.85678	7.37563	7.23482	7.08346	7.79126	6.5021	7.68082	8.01005	8.10834	6.91789	7.9979	7.35379	8.61951	6.16356	7.67152	7.19768	7.64681	7.96988	7.47647	7.15846	4.00157	7.98759	7.95662
COBS00529	6.13588	6.03332	6.43266	6.61707	6.38855	5.89471	6.02119	6.01534	5.84223	5.98173	6.53884	5.89273	6.13462	5.89544	6.45712	6.65483	6.60396	6.8027	6.47065	6.56127	6.33108	4.00157	6.69185	6.57441
COBS00530	7.7409	8.95063	9.15352	9.56067	8.1886	8.06398	7.60399	7.56736	7.74826	7.62034	7.30211	7.72759	8.43822	8.67944	9.24787	9.91373	9.90142	9.96295	9.41478	9.51937	7.81468	4.44244	9.15148	9.08734
COBS00531	5.12576	5.83242	5.71424	5.96082	6.16791	4.33945	4.83244	5.6448	6.37929	5.6015	5.22066	5.50469	5.51999	5.52868	5.93278	6.28461	6.25239	6.20754	6.36287	5.65793	6.18876	4.00157	5.73089	5.64742
COBS00532	9.1381	9.031	9.16743	8.6987	8.50082	9.06239	8.62905	9.24063	9.08926	9.08949	8.52379	9.28728	9.39501	9.2312	9.03557	9.17641	9.19827	9.01295	9.37069	9.30157	9.42358	8.24092	9.50456	8.90251
COBS00533	5.36249	5.28755	4.9838	5.56144	4.88559	5.84768	5.69046	5.14499	5.81285	5.02391	5.58241	5.28722	5.46512	4.7611	5.05165	5.06201	4.64182	5.68429	5.17993	5.03811	5.01687	4.00157	4.96043	4.92028
COBS00534	9.74681	10.1855	11.3602	6.36082	5.48993	4.6728	6.45648	6.53711	5.03153	6.51219	7.32986	6.51927	9.16612	11.2721	11.7891	7.37227	7.45014	7.49801	7.39298	6.75646	6.35022	4.00157	8.51547	7.84557
COBS00535	4.00157	4.38409	4.37895	4.57651	4.51723	4.00157	5.16141	4.00157	4.00157	4.46639	4.87603	5.11173	4.00157	4.00157	4.00157	4.00157	4.00157	4.35662	4.36585	4.32021	4.00157	4.00157	5.03839	5.10156
COBS00536	6.50096	7.10618	6.47026	9.44444	9.71495	7.98546	9.81607	9.3745	10.1934	8.87927	11.8256	8.66653	6.70536	5.81367	6.69802	8.60738	9.23587	8.36036	10.0123	10.1652	9.52828	4.44244	7.86951	9.00563
COBS00537	4.51443	4.66032	4.37895	5.84947	6.78622	4.00157	5.29025	6.49001	6.68647	4.00157	5.58241	5.62912	4.75649	4.00157	4.7521	4.99619	5.36897	5.12628	6.18286	6.40446	6.00453	4.00157	4.96043	5.68593
COBS00538	4.36517	4.38409	4.00157	4.00157	4.88559	4.00157	4.00157	5.09424	5.29847	5.3522	4.00157	4.48445	4.00157	4.00157	4.00157	4.00157	4.00157	4.35662	4.36585	4.00157	4.51701	4.00157	4.47319	4.00157
COBS00539	4.00157	4.66032	4.53377	5.17383	5.48993	4.00157	5.40469	5.54801	4.52469	4.46639	4.62456	5.36471	4.75649	4.00157	5.16953	4.71169	4.45613	4.00157	5.22942	5.63274	5.1835	4.00157	4.52828	4.87883
COBS00543	9.97514	6.6889	7.0265	6.29659	8.24887	8.93016	9.62218	9.73262	9.84151	9.03513	8.93538	9.46428	6.95641	6.91612	6.92987	6.2955	6.45789	6.40221	7.26266	7.70122	9.42792	10.3151	6.69185	7.41785
COBS00544	13.1184	11.7653	11.7625	10.8146	11.4709	11.4945	12.6739	13.0173	12.9951	12.3087	11.8135	12.9332	12.2143	12.2489	12.0192	11.106	11.2666	10.7364	12.39	12.3493	13.0149	12.671	11.6349	12.1337
COBS00545	5.72083	4.76009	4.37895	5.4024	7.10559	5.41991	4.00157	4.49951	4.00157	4.91966	5.68094	4.95444	4.44071	4.87534	4.37999	5.38283	7.54057	5.48667	4.88249	5.03811	4.367	4.00157	5.08678	4.56146
COBS00546	4.88089	4.76009	4.00157	7.65644	7.44547	4.00157	6.90695	4.35454	4.64053	4.00157	4.62456	5.15866	7.13839	4.00157	4.00157	12.9706	7.45458	11.1229	10.9613	9.94285	4.00157	4.00157	4.47319	4.99739
COBS00547	4.00157	4.00157	4.00157	4.33497	9.99052	4.00157	4.00157	4.35454	4.00157	4.91966	4.00157	4.00157	4.00157	4.00157	4.00157	5.53266	5.12191	7.5252	4.00157	4.63505	4.00157	4.00157	4.23816	4.00157
COBS00548	4.00157	4.00157	4.00157	4.66402	5.59862	6.06698	4.00157	4.00157	4.00157	4.65614	5.0648	4.34381	4.44071	4.00157	4.65334	6.33817	5.70717	6.29449	4.88249	4.99172	4.81027	4.00157	4.23816	4.00157
COBS00549	4.00157	4.00157	4.00157	4.33497	5.01729	4.33945	4.42128	5.61342	4.00157	8.6512	9.30439	4.00157	4.00157	4.00157	4.37999	5.44955	5.03355	6.0141	4.80775	4.55127	5.1835	8.8058	4.33579	4.28283
COBS00550	4.00157	4.38409	4.00157	4.80946	7.72652	4.00157	5.22791	4.49951	5.14736	4.46639	4.00157	4.34381	4.44071	4.00157	4.00157	6.09697	6.14208	6.80912	4.95071	4.94267	4.00157	4.44244	4.52828	4.56146
COBS00551	4.00157	4.00157	4.37895	5.75255	10.5097	4.00157	4.59308	4.70236	4.00157	4.00157	4.87603	4.48445	4.00157	4.00157	4.00157	6.41962	6.5793	7.90166	5.17993	5.31083	4.367	4.44244	4.66564	4.68519
COBS00552	5.22726	4.54097	4.00157	5.03593	7.90603	4.00157	4.59308	5.99224	4.37248	8.67511	9.51055	5.06232	4.44071	4.00157	4.53523	4.75966	6.15354	7.30507	4.72447	6.00278	4.72674	4.00157	5.31627	5.06816
COBS00553	4.36517	4.99675	4.75006	6.26327	9.94128	6.49321	6.2017	5.79032	5.47076	7.36323	7.24493	6.4123	5.34641	4.44343	4.98643	5.83148	6.0589	6.20754	5.84128	6.02147	5.32561	4.75941	7.47779	6.63033
COBS00554	5.5557	5.0626	4.37895	7.96645	12.2057	6.41819	6.83845	5.61342	5.09127	6.8498	7.40997	6.08992	6.82689	6.41021	4.7521	8.30266	7.45014	9.29205	5.81293	5.79884	5.23313	5.47046	6.64794	6.19195
COBS00555	5.51965	5.33666	4.65157	6.48074	10.4243	5.72158	5.40469	5.19318	4.00157	6.6425	6.01026	5.32668	4.96909	4.00157	4.37999	6.21735	6.43962	7.73249	4.80775	5.0822	5.23313	4.00157	5.21852	5.03348
COBS00556	4.00157	4.54097	4.53377	5.33168	5.56353	4.00157	5.45763	6.16638	4.96746	5.02391	4.62456	5.36471	4.00157	4.00157	4.00157	5.09319	4.96936	5.19987	5.62733	5.82081	5.1835	4.00157	5.69154	5.62767
COBS00557	5.80992	6.08533	5.95586	7.87925	10.2841	8.78743	5.16141	5.2391	4.64053	4.46639	6.43818	5.43694	5.62235	6.04452	6.90292	6.83379	6.08322	10.3469	5.32166	5.16451	4.95364	4.00157	5.06291	4.99739
COBS00558	6.34041	6.78299	6.73864	7.04817	6.78622	6.73347	6.38502	6.14585	6.5751	5.02391	5.93575	6.29608	6.25817	6.56123	6.74456	7.0806	7.1545	6.97774	7.0863	6.71297	6.71448	4.00157	6.09675	6.08653
COBS00559	5.86591	6.45974	5.95586	6.89778	7.8091	7.07857	7.35992	7.14977	7.85213	6.13574	5.85654	7.28795	6.34378	6.32783	6.53041	6.98573	6.8631	6.66055	7.04137	6.67942	6.62439	4.00157	5.67813	6.04467
COBS00560	5.40395	6.31812	6.35416	6.69279	7.44547	6.25424	6.52435	6.2065	6.37929	5.85257	5.47464	6.04866	6.52454	5.81367	6.41894	6.94591	6.89645	6.54916	6.80571	6.90837	6.52796	4.62267	5.88802	6.2658
COBS00561	7.5401	7.81107	7.84819	8.81075	8.27325	6.4637	8.37339	7.74088	8.10268	6.87102	6.27146	7.44002	7.76689	7.61313	7.88264	8.56699	8.58335	8.17758	8.26381	8.27484	7.57621	8.61901	6.93983	7.5658
COBS00562	4.00157	4.92543	4.37895	4.87236	4.00157	4.00157	4.92743	4.35454	4.00157	4.79992	4.00157	5.15866	4.96909	4.7611	4.00157	4.80452	4.52574	4.43587	5.01375	4.45129	4.00157	4.00157	4.70516	4.83505
COBS00564	4.00157	4.54097	4.00157	4.74063	4.81061	4.00157	5.55651	4.98335	4.00157	4.00157	4.00157	4.59162	4.75649	4.00157	4.00157	4.27229	4.45613	4.43587	5.12777	4.94267	4.00157	4.00157	4.23816	4.4872
COBS00566	4.00157	4.00157	4.37895	4.66402	4.81061	4.00157	6.47948	6.30174	5.61979	6.17154	6.32938	6.87899	4.44071	4.00157	4.37999	4.00157	4.37323	4.25294	4.80775	5.52611	5.87424	4.44244	5.43937	5.58716
COBS00567	4.36517	5.18159	4.00157	4.33497	4.00157	4.00157	5.45763	4.92207	4.00157	5.85257	4.00157	4.59162	4.62026	5.14504	4.9158	4.00157	4.37323	4.00157	4.51538	4.94267	5.52672	4.00157	4.90414	4.78856
COBS00569	4.00157	7.37862	4.00157	4.98486	4.95404	4.00157	5.95491	5.73421	6.23794	5.70832	5.68094	5.40143	5.57231	4.87534	4.00157	4.46911	4.00157	4.00157	4.80775	5.27619	6.67017	4.62267	5.13275	5.64742
COBS00572	4.00157	4.54097	4.00157	4.33497	4.00157	4.00157	4.00157	5.58118	5.09127	4.00157	5.0648	5.32668	4.00157	4.00157	4.00157	4.38387	4.26473	4.43587	4.36585	4.83471	5.23313	4.00157	4.52828	5.10156
COBS00576	4.00157	4.38409	4.00157	4.00157	4.36716	4.00157	5.08996	4.85579	5.38807	4.91966	4.00157	4.75988	4.00157	4.00157	4.00157	4.00157	4.26473	4.00157	4.00157	4.00157	4.51701	4.00157	4.23816	4.83505
COBS00578	4.00157	4.00157	4.00157	4.57651	4.00157	4.00157	4.83244	4.92207	5.2506	4.00157	4.87603	5.20339	4.44071	4.00157	4.00157	4.27229	4.00157	4.00157	4.51538	5.03811	5.28042	4.00157	5.03839	5.50157
COBS00580	4.00157	4.00157	4.00157	4.00157	5.07627	4.00157	4.59308	5.14499	4.37248	4.79992	4.62456	5.40143	4.00157	4.00157	4.00157	4.27229	4.00157	4.00157	4.00157	4.00157	4.51701	4.00157	4.66564	4.39871
COBS00581	4.00157	4.66032	4.00157	4.00157	4.63148	4.00157	4.42128	4.35454	4.00157	6.39811	5.68094	4.00157	4.00157	4.00157	4.00157	4.00157	4.00157	4.00157	4.00157	4.00157	4.367	6.67064	4.57792	4.28283
COBS00585	4.00157	4.00157	4.00157	4.33497	4.00157	4.00157	4.72355	5.19318	4.00157	5.11707	4.62456	4.34381	4.00157	4.00157	4.00157	4.00157	4.26473	4.25294	4.51538	4.89054	4.88522	4.00157	4.96043	4.99739
COBS00587	4.00157	4.00157	4.00157	4.00157	4.36716	4.00157	5.16141	5.14499	5.84223	4.79992	4.62456	4.95444	4.00157	4.00157	4.00157	4.00157	4.00157	4.00157	4.36585	4.45129	5.07583	4.00157	4.62342	4.73885
COBS00597	7.10395	4.00157	4.00157	4.00157	6.99124	6.65797	6.33517	7.13982	7.53145	7.81662	6.67712	7.33776	4.62026	4.44343	4.37999	4.27229	4.00157	4.00157	4.51538	4.00157	7.52822	4.00157	4.70516	4.4872
COBS00599	4.36517	4.00157	4.00157	4.98486	4.36716	4.00157	4.72355	4.98335	4.00157	6.27342	6.84219	5.06232	4.44071	4.00157	4.00157	4.65994	4.26473	4.50244	4.80775	4.89054	4.00157	4.00157	5.67813	4.68519
COBS00601	4.00157	4.84726	4.53377	5.36762	5.23364	4.00157	4.00157	4.92207	5.20034	4.46639	4.87603	5.01005	4.44071	4.87534	4.9158	5.20849	5.12191	5.04643	5.32166	5.16451	4.00157	4.00157	4.70516	4.83505
COBS00603	4.51443	4.38409	4.37895	4.00157	4.00157	4.00157	4.00157	4.00157	4.00157	4.00157	4.00157	5.15866	4.62026	4.00157	4.65334	4.00157	4.00157	4.35662	4.36585	4.32021	4.00157	4.00157	5.11005	5.1338
COBS00604	6.5505	5.28755	5.10952	4.66402	4.36716	4.00157	4.92743	5.28301	4.00157	4.65614	6.1474	5.11173	4.87008	5.47355	5.05165	4.38387	4.00157	4.35662	4.36585	4.32021	5.32561	4.00157	5.11005	5.16497
COBS00606	4.00157	4.84726	4.37895	4.80946	4.00157	4.00157	5.60289	4.00157	4.00157	4.79992	5.47464	4.34381	4.00157	4.00157	4.00157	4.00157	4.26473	4.00157	4.62923	4.00157	4.00157	4.00157	4.96043	4.68519
COBS00610	5.6896	4.54097	4.00157	4.66402	4.36716	4.00157	6.52435	4.49951	4.00157	6.3057	5.0648	5.15866	4.62026	4.44343	4.53523	4.54066	4.52574	4.35662	5.27658	4.55127	4.88522	4.44244	4.74242	5.43281
COBS00621	9.64908	4.38409	4.65157	4.00157	8.64965	10.2936	6.2017	9.15537	9.6521	10.1909	6.84219	9.50802	4.44071	4.62407	4.65334	4.71169	4.26473	4.43587	4.00157	4.55127	8.76973	11.4502	4.93277	4.56146
COBS00625	4.00157	4.00157	4.00157	4.33497	4.00157	4.00157	4.00157	4.00157	4.37248	5.85257	4.87603	5.11173	4.00157	4.00157	4.00157	4.27229	4.00157	4.35662	4.00157	4.00157	4.00157	4.00157	4.87445	4.62658
COBS00652	7.18836	4.66032	5.10952	4.80946	7.21133	7.85897	6.60987	7.09929	7.12773	8.16864	6.5865	7.25374	5.13829	4.87534	4.8384	4.65994	4.52574	4.56086	4.62923	4.7744	6.89155	5.93055	5.23884	4.99739
COBS00657	4.80628	4.54097	4.00157	4.33497	5.01729	4.00157	5.84845	5.67536	4.00157	5.48382	5.22066	6.45918	4.00157	4.00157	4.00157	4.38387	4.37323	4.00157	4.51538	4.45129	6.35022	4.00157	4.52828	4.78856
COBS00666	6.09085	4.00157	4.00157	4.00157	4.00157	4.00157	7.29806	4.00157	4.00157	5.98173	5.77192	4.00157	6.13462	4.00157	4.00157	4.84678	4.00157	4.25294	5.92261	4.32021	4.367	4.00157	4.33579	6.22939
COBS00671	4.80628	4.00157	4.00157	4.66402	4.00157	4.00157	4.83244	4.92207	4.00157	4.65614	5.77192	5.36471	4.62026	4.00157	4.00157	4.38387	4.00157	4.00157	5.07255	4.45129	4.00157	4.00157	4.33579	4.28283
COBS00685	4.00157	4.00157	4.00157	4.47203	4.00157	4.00157	4.00157	4.00157	5.4302	5.20178	4.00157	4.00157	4.00157	4.00157	4.00157	4.00157	4.00157	4.00157	4.51538	4.32021	4.63121	4.44244	4.87445	4.83505
COBS00688	4.00157	4.54097	4.00157	4.47203	4.00157	4.00157	5.16141	4.70236	4.82212	5.54418	4.00157	4.75988	4.44071	4.00157	4.00157	4.00157	4.26473	4.00157	4.51538	4.55127	5.36893	4.00157	4.62342	4.4872
COBS00689	4.00157	4.00157	4.00157	4.47203	4.00157	4.00157	4.59308	4.00157	4.00157	5.80636	7.79436	5.06232	4.00157	4.00157	4.00157	4.00157	4.26473	4.00157	4.00157	4.00157	4.00157	8.7763	4.33579	4.00157
COBS00690	4.51443	4.00157	4.00157	4.98486	4.00157	4.00157	5.92042	4.49951	4.37248	7.50433	8.70278	4.59162	4.62026	4.62407	4.37999	5.40553	4.45613	4.25294	6.52147	4.32021	4.88522	6.71374	4.47319	4.4872
COBS00692	5.97084	8.3576	7.69459	7.46478	6.68602	4.33945	6.90695	5.70514	5.97955	6.39811	6.1474	6.26093	7.98792	7.79235	7.49381	7.71905	7.63344	7.51749	7.59181	7.29925	7.00213	4.97278	7.21537	6.93986
COBS00693	6.22154	6.78299	7.21185	7.42168	7.14885	7.29919	7.03461	7.05757	6.21646	5.85257	5.68094	7.06901	6.64032	6.801	7.05733	7.33703	7.12683	7.67825	6.67837	6.7882	6.81263	4.00157	6.45667	6.56486
COBS00694	4.00157	4.92543	5.04887	5.13009	5.07627	6.37108	5.08996	4.60994	4.00157	6.27342	5.85654	6.08992	4.62026	4.62407	4.37999	4.71169	4.58682	4.98896	4.88249	4.94267	4.63121	4.00157	6.3258	5.38445
COBS00695	10.2482	9.93803	10.2773	8.99715	9.2762	9.3053	8.98483	9.001	9.18743	10.4874	10.3204	9.57981	10.2536	9.63743	9.83785	9.54984	9.57015	9.36964	9.32982	9.42862	8.85601	8.67337	10.8496	9.74181
COBS00696	9.68	9.69741	9.92481	10.0549	9.80945	9.74307	9.72355	9.85479	9.83983	9.42504	8.95317	9.50802	9.70279	10.1222	9.94559	10.1887	10.1477	10.2181	10.2425	10.1383	9.81157	9.00116	9.64583	9.94055
COBS00697	8.71454	9.64733	9.6792	9.52913	8.87955	9.40264	9.46376	9.6045	9.41609	8.44408	8.68159	9.41725	9.53835	9.98666	10.0106	9.77992	9.7821	9.64656	10.0795	10.0641	9.05428	4.87342	9.1624	9.57618
COBS00698	10.3053	9.19624	9.61775	9.18366	9.87449	10.4547	9.83561	10.2707	10.144	10.5868	10.1765	10.4261	9.90767	10.0291	9.43055	9.78917	9.65201	9.75883	9.687	9.49917	10.1197	10.1392	9.95418	9.57964
COBS00699	9.24904	9.41082	8.78985	10.5411	11.1647	9.98849	10.7304	10.6736	11.0697	9.63446	9.85114	10.2559	8.69968	8.48548	8.9345	10.2389	10.562	10.2128	10.5964	10.7245	10.5054	8.85835	9.53428	9.91795
COBS00700	12.3596	12.2778	11.8448	13.965	13.6023	13.436	12.8995	11.9672	12.2147	12.6435	13.3056	12.2459	11.9828	11.8021	12.0447	13.3061	12.997	13.2362	11.6687	11.9833	11.7058	12.9116	12.4775	12.0414
COBS00701	5.01193	5.70104	5.22022	7.63149	6.75833	4.00157	5.95491	5.09424	4.00157	4.65614	5.85654	5.01005	5.67034	5.28919	5.36972	5.86222	5.99601	5.93023	5.12777	5.16451	4.88522	4.00157	5.92161	5.68593
COBS00702	4.36517	4.00157	4.00157	4.47203	5.18399	4.33945	5.01248	5.14499	5.29847	4.00157	5.22066	4.68136	4.44071	4.00157	4.00157	4.46911	4.37323	4.25294	4.51538	4.45129	5.1835	4.00157	4.52828	4.39871
COBS00703	4.00157	4.84726	5.04887	8.17021	7.2515	8.01046	4.00157	4.49951	5.2506	5.80636	5.58241	5.47133	5.05767	4.7611	4.9158	6.46813	6.11886	6.45299	4.95071	5.27619	4.51701	4.00157	5.40561	5.35943
COBS00704	4.51443	4.00157	4.00157	4.80946	5.07627	5.89471	4.00157	4.70236	4.64053	6.20639	4.87603	4.34381	4.00157	4.00157	4.65334	4.60343	4.58682	4.61349	4.36585	4.32021	4.51701	4.00157	4.90414	4.62658
COBS00705	4.00157	4.54097	4.75006	6.71712	6.95503	6.55038	5.55651	4.00157	4.37248	5.75833	5.22066	5.20339	4.75649	4.44343	4.9158	5.38283	5.36897	5.43137	4.36585	4.63505	5.07583	7.17821	4.84358	4.92028
COBS00706	4.80628	5.33666	4.91335	6.32909	5.45123	4.00157	6.38502	4.60994	4.89811	5.54418	6.43818	5.40143	5.34641	5.21973	4.98643	5.38283	5.53182	5.6536	5.27658	5.52611	4.51701	4.00157	6.22501	5.86194
COBS00707	8.4697	8.14251	8.36619	11.0498	10.1088	11.3142	10.4734	10.162	10.0014	10.0746	10.3066	10.0345	8.37449	8.03755	8.05555	10.5186	10.145	10.769	9.86755	9.96114	10.3812	10.6257	10.4152	10.1835
COBS00708	5.12576	5.18159	4.65157	7.68703	4.81061	8.46175	5.22791	4.78321	5.38807	4.46639	4.62456	5.06232	4.75649	4.87534	4.7521	4.92491	5.03355	8.13805	4.00157	5.4688	4.00157	4.44244	5.21852	4.87883
COBS00709	8.14331	9.06804	7.79161	8.63142	7.29056	7.73227	7.59376	7.68762	7.34394	7.18982	7.5102	7.43241	8.17185	8.35112	7.71682	8.26592	8.37573	8.91279	7.84604	7.95608	6.77141	4.75941	7.15028	7.77455
COBS00710	4.00157	4.38409	4.65157	5.84947	4.36716	6.83949	4.83244	4.00157	4.00157	5.85257	4.87603	4.95444	4.44071	4.7611	4.65334	4.00157	4.37323	6.30381	4.51538	4.94267	4.88522	4.00157	5.17658	4.87883
COBS00711	5.27434	4.99675	4.00157	4.66402	5.01729	4.6728	5.95491	4.00157	5.75188	6.022	5.93575	5.98417	4.00157	4.44343	4.53523	4.00157	4.52574	4.43587	4.36585	4.89054	5.01687	4.00157	4.93277	5.06816
COBS00712	4.00157	4.00157	4.00157	4.00157	4.00157	4.00157	4.59308	5.54801	5.38807	5.6015	4.00157	4.48445	4.00157	4.7611	4.00157	4.00157	4.00157	4.43587	4.62923	4.45129	4.81027	4.00157	4.52828	4.39871
COBS00714	4.00157	4.66032	4.53377	5.33168	4.81061	6.57808	4.72355	4.78321	4.00157	4.46639	4.62456	5.20339	4.62026	4.00157	4.53523	4.38387	4.52574	5.10042	4.62923	4.70844	4.72674	4.00157	4.90414	4.87883
COBS00715	4.00157	4.54097	4.00157	4.66402	4.00157	5.7988	4.00157	4.70236	4.37248	4.46639	5.47464	4.34381	4.44071	4.00157	4.00157	4.00157	4.37323	4.35662	4.88249	4.94267	4.00157	4.00157	4.87445	4.56146
COBS00716	7.8218	8.49103	8.56862	10.6022	9.73435	9.59116	7.60399	7.19849	6.91158	9.14615	9.59224	7.54247	7.68489	7.9952	8.68117	9.90694	9.76536	9.88771	7.87802	8.31103	7.50359	9.9695	8.83526	8.98489
COBS00717	4.00157	4.38409	4.00157	4.74063	4.95404	4.00157	4.83244	4.00157	4.00157	4.00157	5.58241	4.68136	4.00157	4.00157	4.00157	4.38387	4.52574	4.61349	4.72447	4.94267	5.1835	4.00157	4.81141	5.16497
COBS00718	11.6711	11.9272	11.6055	11.904	12.953	11.4619	12.4606	12.0176	12.1797	12.0412	12.2818	11.9175	11.5359	11.5383	11.8601	12.0623	12.0432	11.827	12.365	12.5017	12.083	12.5865	12.3626	11.9271
COBS00719	10.5474	10.9447	11.8457	10.2252	10.1448	9.41389	9.92547	9.93653	9.92605	11.1533	10.9286	9.98769	10.5727	10.4552	11.2278	10.3931	10.3853	10.3474	10.2016	10.176	9.87328	9.16558	11.9979	10.727
COBS00720	7.71994	8.34254	8.92374	7.98622	7.4281	7.9905	7.22007	7.42785	7.96139	7.8902	7.7128	7.60464	9.21417	9.04092	8.72724	7.91869	8.14665	8.16534	8.03935	7.80665	7.80131	4.00157	8.82704	8.35782
COBS00721	10.0729	10.3734	10.5603	10.5049	9.99492	11.022	10.2699	9.80902	9.80419	10.2115	10.3542	9.90695	10.3344	10.4061	10.1607	10.8387	10.3911	10.4333	10.6737	10.5354	9.70483	10.8661	10.382	10.4289
COBS00722	8.34335	9.6185	8.90725	9.65291	9.02425	8.74348	9.15356	8.77504	8.7432	8.53185	8.41236	8.54565	9.2178	8.84082	9.01406	8.84096	9.1529	8.84703	8.87925	9.23921	8.8102	8.34518	8.93546	8.96561
COBS00723	7.89837	7.64858	7.29611	7.70507	7.64637	5.6102	6.87312	7.468	7.49759	7.39259	6.98969	7.26237	7.6743	7.13707	7.06946	6.7038	6.89645	6.66055	6.57046	6.73488	7.01389	4.00157	6.90323	6.5933
COBS00724	11.9076	11.092	11.6453	10.5902	10.8922	11.7094	10.7488	11.0918	11.0846	11.2399	11.0999	11.0635	11.6491	11.7523	11.4087	11.3298	11.2518	11.3959	11.0038	10.7589	11.1809	12.306	11.2053	10.896
COBS00725	6.80166	4.00157	4.53377	4.00157	6.00528	6.37108	5.22791	6.338	6.70167	6.36801	5.77192	6.4123	4.75649	4.62407	4.37999	4.00157	4.37323	4.00157	4.51538	4.00157	6.5112	7.22309	4.33579	4.56146
COBS00726	4.00157	5.28755	4.53377	4.57651	4.72705	4.00157	5.55651	4.70236	4.00157	4.00157	5.77192	4.00157	5.13829	4.87534	4.8384	4.60343	4.58682	4.70643	4.62923	4.99172	4.72674	4.00157	5.11005	5.03348
COBS00730	4.00157	4.66032	4.37895	4.80946	4.00157	4.00157	4.42128	4.00157	5.38807	5.02391	4.00157	4.89485	4.75649	4.44343	4.00157	4.27229	4.52574	4.00157	4.95071	5.16451	4.00157	4.00157	4.41045	4.39871
COBS00731	5.31935	5.0626	5.04887	4.98486	5.52733	5.63905	6.40926	5.28301	4.82212	5.85257	5.77192	6.31332	6.16662	6.00886	5.45709	5.09319	4.82376	4.92735	5.27658	5.20316	5.78899	4.00157	5.35292	5.30754
COBS00732	4.62807	4.76009	4.65157	4.66402	4.88559	4.00157	4.59308	4.00157	4.64053	4.65614	6.1474	4.75988	4.62026	4.62407	4.37999	4.00157	4.37323	4.43587	4.72447	4.99172	5.1835	4.00157	4.52828	4.62658
COBS00735	4.00157	5.18159	4.91335	6.37641	5.69798	6.18252	7.01928	5.89536	5.89898	4.65614	5.58241	5.28722	4.87008	5.35425	4.65334	5.28685	5.83093	5.55639	6.52147	7.0366	5.92799	4.44244	5.27829	6.47577
COBS00736	4.00157	4.76009	4.00157	4.47203	4.51723	4.00157	5.29025	4.49951	4.73743	4.00157	4.00157	4.89485	4.62026	4.00157	4.00157	4.46911	4.00157	4.00157	4.00157	4.32021	5.28042	4.00157	4.62342	4.62658
COBS00737	8.49451	9.17093	8.50864	9.45684	10.048	7.48996	12.0226	10.5474	10.931	9.527	10.5567	10.5671	9.56425	9.9024	8.56332	8.48265	8.86417	7.93668	10.5693	11.0517	10.5607	4.00157	9.34409	10.7383
COBS00738	4.51443	6.82774	6.52477	7.50661	7.34719	4.00157	8.54174	7.37813	7.8786	6.022	7.55778	7.40155	7.05859	7.28614	6.276	6.56023	6.51126	5.78589	7.98757	8.59242	7.22047	4.44244	7.44212	8.47908
COBS00739	10.2336	10.7695	10.0959	11.0799	11.07	8.67338	12.9412	11.7143	12.0485	10.6544	11.4951	11.7841	10.8699	11.1696	10.0337	10.0813	10.5762	9.56994	12.1679	12.8167	12.0233	11.4634	10.8863	12.3039
COBS00740	5.07063	4.66032	4.37895	4.80946	5.18399	4.33945	5.73194	5.67536	5.81285	5.11707	5.58241	5.71442	4.62026	4.00157	4.65334	4.54066	4.69219	4.66171	5.07255	5.16451	5.90141	4.00157	4.81141	5.10156
COBS00741	11.4931	11.6357	11.3741	11.3839	11.0497	11.4128	10.607	10.5566	10.6108	11.5638	11.4536	10.6979	11.3517	11.1485	11.5054	11.6091	11.4665	11.5399	10.9621	10.8115	10.4701	11.4028	11.8787	11.2316
COBS00742	6.37778	6.72098	5.95586	8.8245	9.50709	8.05919	10.5211	9.85779	10.2142	8.65722	8.57067	9.42298	6.06816	6.26994	5.84548	8.62198	9.13242	7.93668	10.2191	10.3335	9.76605	6.77595	8.25231	9.3231
COBS00743	6.09085	5.33666	4.75006	7.3922	9.02138	7.17992	8.98871	8.51067	8.61176	7.01119	6.80273	7.68351	4.75649	4.87534	4.9158	6.77414	7.1435	6.2469	7.69613	8.09553	8.56816	4.00157	6.18064	7.11141
COBS00744	5.59065	4.92543	4.83614	6.17608	6.47792	4.00157	7.01928	6.14585	6.19462	5.65612	5.77192	5.84437	4.87008	4.00157	5.05165	5.47092	5.64015	5.69934	6.73642	6.95553	5.56291	4.00157	5.92161	6.4655
COBS00747	4.00157	4.54097	4.37895	4.74063	4.51723	4.00157	4.92743	4.70236	5.2506	4.00157	4.00157	4.75988	4.96909	4.44343	4.37999	4.00157	4.00157	4.56086	4.36585	4.55127	5.07583	4.00157	4.66564	5.03348
COBS00748	4.62807	4.38409	4.37895	5.29445	5.13166	4.00157	6.25671	5.19318	5.29847	4.65614	5.0648	4.89485	4.00157	4.62407	4.37999	4.84678	4.52574	4.56086	5.36487	5.4688	5.01687	4.44244	4.62342	5.1338
COBS00749	4.00157	4.00157	4.53377	4.87236	4.36716	4.00157	4.00157	5.2391	4.37248	4.00157	5.47464	5.20339	4.00157	4.00157	4.00157	4.00157	4.00157	4.25294	4.62923	4.7744	5.23313	4.00157	4.52828	4.78856
COBS00750	4.00157	4.38409	4.37895	4.66402	4.72705	4.00157	6.56778	4.00157	5.29847	4.00157	5.0648	4.75988	4.44071	4.7611	4.00157	4.38387	4.64182	4.35662	4.51538	4.70844	5.45065	4.00157	4.47319	4.73885
COBS00751	4.00157	4.38409	4.00157	4.00157	4.81061	4.00157	4.42128	4.98335	4.52469	5.94014	6.1474	4.34381	4.00157	4.00157	4.37999	4.27229	4.00157	4.56086	4.51538	4.32021	4.63121	4.44244	4.41045	4.73885
COBS00753	9.88279	9.66153	9.28688	10.3996	11.1483	10.4179	11.0522	10.3622	10.883	10.1889	10.41	10.3248	9.48513	9.31597	9.49848	10.1295	10.0637	9.96998	10.1293	10.2457	10.5388	10.4409	10.2424	9.99338
COBS00754	6.65953	8.09533	8.30702	7.71697	6.44288	4.00157	5.92042	6.42456	6.78949	6.06104	6.27146	6.74864	8.5692	8.58002	8.11464	8.03884	8.13018	8.29451	8.0223	7.95608	6.593	4.00157	7.76977	7.70406
COBS00755	7.83485	9.21287	9.53009	8.76583	7.66128	7.9905	7.46489	7.82341	7.93642	7.69274	7.5102	7.50672	9.45776	9.45638	9.53991	9.28251	9.23587	9.18124	8.96482	8.84007	7.97205	4.62267	8.97317	8.57016
COBS00756	8.23949	8.29117	8.29184	8.35239	8.21402	7.76207	7.62423	8.02447	8.05131	7.78389	7.15456	8.26831	8.25212	8.19543	8.27338	8.72408	8.66743	8.64017	8.42368	8.35327	7.87335	4.00157	8.20863	7.96373
COBS00757	7.70579	8.06503	6.75379	10.4214	11.07	9.35868	12.3637	11.9696	12.2244	10.3272	10.3642	11.3856	7.38018	6.93441	7.1629	9.52013	10.262	9.10404	11.1047	11.5891	11.9328	11.4044	10.0084	11.2602
COBS00758	5.94541	6.88524	5.84097	7.70507	8.42455	6.4487	9.28259	8.34917	8.37735	6.3057	6.84219	7.59786	6.03359	6.04452	6.29738	7.33193	7.80623	6.8345	8.79161	8.8887	8.21793	4.00157	6.6732	7.68696
COBS00759	8.01179	8.42586	7.59048	9.79369	10.1966	8.57648	11.0559	10.4444	10.7573	8.68692	8.95317	9.94325	7.58663	7.54408	7.91628	9.34663	9.93962	8.96304	10.8128	11.0901	10.2305	9.31998	8.50863	9.97861
COBS00760	7.41493	7.607	6.64406	8.64078	9.29058	8.52546	10.1945	9.70122	10.1152	7.73904	8.11282	9.18542	6.84615	6.60806	7.34299	8.46656	9.12138	8.04492	9.93569	10.0525	9.6202	4.00157	7.61215	8.90986
COBS00761	6.8151	6.45974	5.41066	6.77615	7.56145	6.25424	8.99259	9.21979	8.42739	7.25537	6.63256	8.31842	6.06816	6.11301	5.61361	6.52414	7.34877	6.11443	7.93384	8.30386	8.67065	4.00157	6.9654	7.72516
COBS00762	5.75126	5.95112	5.8707	7.70507	6.8536	9.06239	6.47948	6.7509	6.97505	9.8065	11.2512	7.32958	5.96153	5.67973	5.71851	6.14646	5.81613	7.18801	6.16126	6.74571	7.63779	10.143	7.07267	8.87459
COBS00763	5.48241	4.00157	4.53377	4.66402	6.49511	4.00157	4.59308	6.50589	6.32054	4.79992	4.00157	6.00603	4.75649	4.44343	4.37999	4.75966	4.52574	4.35662	5.01375	4.45129	5.72866	4.00157	4.66564	4.28283
COBS00764	12.0616	11.9297	11.8235	13.2919	13.7097	12.8992	13.5779	13.1346	13.2113	12.9438	13.5009	12.9049	11.4773	11.7466	11.7436	13.2417	13.0305	13.0915	12.9045	13.0883	13.098	13.6821	12.3372	12.662
COBS00766	4.80628	6.81298	6.24904	7.91064	7.13816	4.00157	7.23337	6.93596	7.02382	6.53927	6.76212	6.4123	6.10181	6.17805	6.25427	6.67953	6.72103	6.51786	7.16161	7.56346	7.00213	4.00157	6.90852	7.04529
COBS00768	11.1008	10.2726	11.2896	9.76832	9.88716	10.2762	11.0108	11.5343	11.7516	11.2987	10.8549	12.9372	10.8444	11.6635	10.6521	10.303	10.068	10.0544	11.1846	11.2446	11.4063	11.4533	10.5931	12.372
COBS00769	10.8875	10.2792	10.5957	10.1895	10.4024	11.2514	10.4734	10.7081	10.7688	11.3899	10.9793	10.9366	10.4407	10.489	10.4044	10.425	10.3743	10.5603	10.4516	10.2587	10.6864	10.4013	11.1838	10.6207
COBS00770	10.048	10.0471	9.98098	9.91039	9.78259	9.98472	9.25705	9.52178	9.58166	9.83062	9.63692	9.63181	10.1009	9.95399	10.0458	10.2637	10.0521	10.2508	9.95074	9.78497	9.32238	11.069	10.0844	9.57502
COBS00771	7.54806	7.86137	7.75507	7.56713	7.69789	7.80277	8.04727	7.73433	7.62843	8.37272	7.38377	7.50672	7.90898	7.67899	7.71682	7.99776	8.03604	8.14305	7.80669	7.91428	7.43577	4.44244	8.19803	7.75007
COBS00772	11.3929	10.313	10.5603	7.36209	7.52111	6.33873	10.3566	10.9395	10.4244	10.4481	10.2962	10.7229	11.5732	11.8783	10.6864	7.09277	7.31982	6.59481	9.89426	9.78497	10.9027	4.00157	9.91922	9.99338
COBS00773	10.1862	9.89748	9.7042	10.4729	10.8394	9.80418	12.4295	11.9148	12.2982	11.5686	11.4614	11.3166	9.53253	9.20551	9.26097	9.86028	10.3301	9.52767	11.7937	11.8802	11.934	12.1805	11.631	11.3138
COBS00774	6.0202	6.53444	5.92811	7.09491	7.44547	5.87142	7.72134	7.30899	8.20543	5.98173	7.05798	7.08862	6.45002	5.72605	6.06607	6.52414	6.62819	6.28511	6.98311	7.64543	7.68229	4.44244	6.55567	8.15269
COBS00775	6.80166	5.97912	6.15848	6.69279	7.39271	4.33945	8.68284	8.22424	8.4972	7.40705	7.4357	7.63142	5.99807	5.89544	5.75152	6.38965	6.57098	6.17724	7.76622	8.03185	8.25265	4.00157	7.52287	7.40741
COBS00777	5.27434	4.66032	4.00157	6.495	5.13166	4.33945	5.55651	5.36559	5.03153	4.46639	5.35526	5.28722	4.96909	4.7611	4.37999	10.2874	8.83065	10.2788	4.80775	5.12426	5.28042	4.44244	5.06291	4.73885
COBS00778	9.99697	8.79359	9.9067	8.73412	8.44614	8.43619	8.49327	9.21745	8.39575	9.89813	10.1953	9.3427	9.82442	10.2408	9.61119	9.22908	8.69564	8.85466	10.9037	8.75868	8.90975	5.96828	10.6474	9.61379
COBS00779	5.65754	4.38409	5.41066	4.74063	4.72705	4.00157	5.34902	5.04052	5.20034	7.18982	6.48944	5.71442	7.90898	7.71081	4.65334	5.53266	5.4534	5.39289	6.43567	5.37683	5.72866	4.00157	7.59279	6.22939
COBS00780	4.51443	4.84726	4.91335	4.80946	5.01729	6.5221	4.59308	4.60994	4.52469	6.3057	5.68094	4.75988	4.00157	4.00157	4.37999	4.38387	4.64182	5.01816	4.72447	4.45129	4.88522	4.00157	5.40561	5.06816
COBS00781	10.7183	10.8629	11.3352	10.864	12.0596	11.3242	12.2426	12.1073	12.6367	10.9272	11.2937	11.6665	10.2816	10.5945	10.9899	10.8603	11.276	10.468	11.7578	11.8678	12.1095	11.451	10.3273	11.4589
COBS00782	4.00157	5.18159	4.75006	5.29445	4.81061	4.00157	5.22791	4.70236	5.2506	5.75833	5.93575	4.48445	5.28168	5.14504	4.53523	4.46911	4.37323	4.50244	4.72447	4.55127	4.51701	4.00157	5.25876	5.06816
COBS00783	4.00157	4.92543	4.37895	4.93054	4.00157	4.00157	6.1733	4.00157	4.96746	4.79992	5.0648	4.89485	4.75649	4.44343	4.00157	4.38387	4.26473	4.50244	4.00157	4.45129	4.00157	4.00157	5.17658	5.1338
COBS00784	4.00157	5.12398	4.37895	4.47203	4.51723	4.00157	4.00157	4.85579	4.00157	4.79992	5.35526	5.20339	5.05767	4.44343	4.53523	4.54066	4.00157	4.43587	4.36585	4.32021	4.88522	4.00157	4.90414	4.73885
COBS00786	7.91074	7.95033	7.16775	8.50038	8.85718	8.16536	8.51501	8.00287	9.01989	7.44956	7.40997	7.44002	7.04207	7.18347	7.79129	7.71905	8.06522	7.82582	7.93384	8.05766	8.08105	4.44244	6.77567	7.29294
COBS00787	4.36517	4.38409	4.37895	4.98486	5.18399	4.33945	5.08996	4.92207	4.82212	4.00157	4.00157	4.34381	4.96909	4.00157	4.9158	4.88682	4.58682	4.61349	5.07255	5.16451	4.63121	4.00157	4.57792	4.73885
COBS00788	11.2219	10.7373	10.3619	11.2706	12.4872	11.4754	10.6394	10.7715	10.9341	10.6378	10.3938	10.4974	10.3885	10.3866	10.5448	12.3001	11.2566	11.6928	10.6257	10.5475	10.6083	9.86373	10.4455	10.104
COBS00790	8.09539	5.59206	8.37101	6.74104	5.72933	8.19617	5.34902	4.98335	4.73743	11.1869	11.2148	9.37849	5.84507	5.72605	5.71851	5.61009	5.14959	6.4695	5.86898	6.14519	5.84648	10.2469	12.4599	10.6429
COBS00791	6.65953	5.66582	5.71424	8.17882	11.2295	10.1406	9.45256	8.70003	9.26443	8.44408	8.38638	8.49212	5.88511	6.17805	5.27454	10.659	10.3917	10.2269	10.0561	10.0125	7.03713	7.53855	5.86512	8.03628
COBS00792	9.72779	5.23597	4.75006	7.54724	12.6761	10.5622	5.55651	6.45769	4.00157	4.91966	4.00157	4.34381	7.27153	5.89544	5.05165	8.47577	9.8278	10.1198	8.6023	8.91005	5.1312	4.00157	4.47319	4.28283
COBS00793	5.31935	7.50195	8.25578	7.2839	6.14589	5.58062	5.69046	6.40769	4.82212	5.94014	6.01026	6.29608	7.87245	8.05414	8.07948	7.6348	7.60979	7.93956	7.36605	7.39063	7.07127	4.75941	7.23223	7.53263
COBS00794	13.8036	13.8886	13.6793	11.6726	11.0398	12.3911	11.5547	11.6457	11.4245	11.7566	11.5266	11.8109	13.9731	14.1123	13.9733	12.5872	12.7182	12.8986	12.4133	12.21	11.6746	11.444	11.9786	12.1486
COBS00795	12.8787	11.3573	11.139	8.53762	8.10953	8.18743	11.416	11.6535	10.8601	10.571	10.8141	10.5705	12.2533	12.5731	11.154	8.70658	8.80499	8.75059	11.0252	10.6419	11.7397	10.6063	11.0281	10.8181
COBS00796	12.4512	10.6444	10.662	9.81725	9.87131	10.3177	11.078	11.0167	11.1435	9.91075	10.2248	10.5765	12.0772	12.7386	11.3114	10.3913	10.4014	10.2646	11.3784	11.1561	10.8576	9.90969	10.0919	10.727
COBS00797	7.47472	7.68898	7.7698	10.5353	9.60233	9.29723	8.73932	8.90266	8.64672	9.12028	9.44296	8.89531	7.34041	7.38185	7.42979	11.4885	10.9442	11.5521	8.35733	8.30027	8.45355	4.75941	9.13716	9.15077
COBS00798	7.92301	7.94368	8.48215	7.95145	7.57727	7.57987	7.61415	8.75262	7.51462	10.6438	11.3434	7.91335	8.25919	8.17283	8.31425	8.29226	8.12741	8.06878	8.428	8.13646	7.59962	4.62267	7.98266	8.00563
COBS00799	6.53418	6.89925	5.74719	7.35447	7.29056	7.55962	7.93054	8.55948	7.81148	9.06257	8.77459	7.60464	6.54849	5.63152	6.39943	6.89796	7.25498	7.217	7.09731	7.20931	8.14585	8.85365	8.03127	7.41264
COBS00800	8.84558	9.3866	9.60963	9.48827	8.97762	8.16536	9.08261	8.98736	9.14191	8.90476	9.0306	8.73875	9.56994	9.57862	9.59473	9.78177	9.85554	9.74905	9.77249	9.54537	9.0202	4.44244	10.0543	9.43686
COBS00801	8.92066	8.67449	8.76078	8.3294	7.89977	8.37984	9.64943	7.99742	8.08008	8.48526	8.93538	8.17619	9.08494	8.88313	9.00785	8.87094	8.58536	8.60803	9.54149	8.24148	8.17719	9.91195	8.82978	8.07942
COBS00802	8.92371	9.71308	9.39483	10.142	10.5776	10.2618	10.7522	10.6163	10.7341	8.99772	9.70669	9.93259	8.8097	9.07376	9.47844	10.0738	10.4139	10.1822	10.1953	10.2997	10.6263	8.29052	8.43299	9.58194
COBS00804	4.72315	5.12398	4.9838	4.98486	4.95404	4.00157	5.50816	5.86992	4.00157	4.79992	4.00157	5.15866	4.96909	5.28919	5.16953	4.65994	4.89988	4.86071	4.88249	5.24034	4.51701	4.00157	4.70516	4.92028
COBS00805	14.5167	13.9063	15.1536	13.1803	12.7151	13.2243	15.6501	15.8345	16.1742	13.9823	14.121	15.8816	14.3089	15.1872	14.7548	12.8938	13.0192	12.8345	14.7368	14.8418	15.8901	15.1677	13.2182	15.5749
COBS00806	6.61386	5.92249	6.0096	5.29445	5.41113	4.00157	4.42128	6.64104	6.19462	4.00157	4.00157	6.59081	5.57231	6.14594	6.25427	5.64695	5.4933	5.77189	6.16126	5.73045	4.72674	4.00157	5.29745	6.16639
COBS00807	8.85199	9.53722	9.46405	8.83813	7.46263	7.43908	8.14825	7.49932	8.1414	7.72761	8.03123	8.04832	9.38858	9.34986	9.48292	9.62725	9.43291	9.41982	9.76059	9.4417	7.96608	8.66266	9.27031	9.20556
COBS00808	4.88089	5.18159	4.83614	4.47203	4.63148	4.00157	4.42128	4.49951	4.00157	4.00157	4.00157	5.15866	5.13829	4.7611	5.05165	4.99619	4.58682	4.98896	4.62923	4.55127	5.45065	4.00157	4.47319	4.68519
COBS00809	9.27311	9.41322	9.56622	9.54582	9.24456	9.78986	9.4996	9.06994	8.96864	8.96417	9.48022	9.16278	9.10469	9.35321	9.20513	9.42118	9.57825	9.6915	9.38406	9.63639	9.02307	8.67337	9.40328	9.6581
COBS00810	9.05724	9.45575	9.45727	9.25036	9.34668	8.95605	8.92118	8.82806	8.95011	9.84648	9.47408	9.07094	9.24653	8.9554	9.52912	9.34537	9.40017	9.26485	8.99419	8.75868	8.94045	4.44244	9.92756	8.92264
COBS00811	10.6418	9.35199	9.89839	7.59323	8.16794	8.46897	9.22776	9.51229	9.25691	9.83062	9.86059	9.66278	10.557	10.4109	9.97608	8.45728	8.45714	8.53772	9.06787	8.59829	9.31537	9.87998	9.23661	9.10025
COBS00812	9.70851	11.7563	11.0829	10.9002	9.06664	9.16141	9.11141	9.36819	9.2719	9.87254	9.39823	9.20105	12.0697	10.7561	10.6747	9.48296	10.5923	9.94236	9.35267	9.61634	9.23844	10.4734	10.5879	9.94949
COBS00813	13.283	12.2699	12.4856	12.0288	12.4739	12.9629	12.66	12.5612	12.7857	12.6484	12.7942	12.4331	12.5208	12.4791	12.4049	12.1695	12.1634	12.1971	12.2623	12.3776	12.6605	13.7753	12.4647	12.3544
COBS00814	11.4142	11.0837	11.2418	10.866	10.8732	10.2885	10.9534	10.7466	10.7547	10.5899	11.0899	10.5885	11.1212	11.2033	11.2718	10.9665	10.9798	10.884	11.1014	11.1351	10.8512	11.2024	11.3204	11.2516
COBS00815	8.76297	9.08621	9.86124	8.61251	8.17831	9.07189	8.44311	8.42815	8.46707	8.30531	8.55909	8.72336	9.86434	10.0642	9.4444	9.12175	8.92101	9.0886	9.11675	9.03627	8.1977	4.00157	8.90326	8.98663
COBS00816	8.63871	8.876	9.48196	8.04394	7.66868	7.19759	7.59376	7.66022	7.81148	7.5177	7.96243	8.4021	9.47606	9.8056	9.6927	8.67893	8.71965	8.9331	8.82796	8.75344	7.978	4.00157	8.42756	8.62036
COBS00817	7.94121	8.40185	8.45969	8.40466	8.81469	9.00649	8.1552	8.30138	7.23483	8.43009	8.54742	8.56306	8.47514	8.02076	8.52904	7.98488	7.90328	7.91343	7.52047	7.2247	8.18748	8.97976	8.64581	7.68696
COBS00818	8.3204	7.607	7.33643	8.58043	9.13463	9.95038	8.10584	8.0925	8.05131	8.67511	8.17491	8.22518	7.38018	7.07272	7.82712	7.84572	7.80623	8.34092	7.47923	7.0366	8.42775	8.41709	7.1324	7.34314
COBS00819	4.00157	4.99675	5.10952	5.75255	5.28094	4.00157	5.29025	4.60994	4.00157	5.98173	6.38488	4.89485	4.62026	5.14504	4.37999	5.33594	5.00205	5.15144	5.32166	5.43899	4.63121	4.00157	5.11005	5.43281
COBS00820	9.07652	9.06193	9.36859	8.76298	8.70082	9.6839	9.27625	9.31022	9.24176	8.99772	8.9881	9.20991	9.42673	9.87007	9.48961	9.73272	9.63368	9.63067	9.81752	9.66457	9.42141	4.00157	9.40512	9.28545
COBS00821	7.76838	7.57284	6.67632	9.01645	9.7238	8.70733	9.32008	9.64848	9.8925	8.23458	8.04792	8.9858	7.24301	6.65333	7.09341	8.26592	8.75225	7.90756	9.43205	9.65898	9.12011	7.08391	7.15471	8.31686
COBS00822	10.2841	10.3917	9.73626	11.3797	12.0832	11.2597	12.1341	11.9018	12.3909	10.746	10.6577	11.6673	9.92332	9.90924	9.80604	10.681	10.9497	10.6075	11.4768	11.7072	11.7341	10.4061	9.96669	10.89
COBS00824	11.4844	12.1642	13.2594	11.756	10.6939	11.4456	10.5358	10.2718	10.715	10.6693	11.0899	10.8837	12.3986	12.7199	12.631	11.52	11.5307	11.8478	11.1556	11.1346	10.816	10.7331	11.4521	11.4482
COBS00825	5.80992	6.18346	7.05105	6.52309	5.78968	5.6102	6.36032	4.49951	5.84223	4.79992	5.68094	5.28722	5.84507	6.2094	6.72922	6.09697	6.4211	6.70268	6.22504	6.30376	5.28042	5.72254	5.91051	6.03041
COBS00826	11.0613	10.6331	11.3919	10.1863	10.167	11.3385	10.7023	10.8345	10.8765	10.8996	10.8286	11.427	11.35	11.4928	10.9573	10.786	10.5185	10.6576	10.8332	10.819	10.8358	10.1829	10.5883	11.0213
COBS00827	9.33843	8.99619	9.57667	8.57718	8.85396	8.53581	8.82009	8.89975	8.74678	9.28459	9.21878	9.23617	9.54704	9.25645	9.33717	9.3315	9.11861	9.18245	8.96482	8.75344	8.46627	8.68401	9.65899	9.02099
COBS00828	4.62807	5.66582	5.04887	4.66402	4.51723	4.00157	7.4536	7.64632	6.50713	8.87927	9.34536	7.6642	5.34641	6.24002	6.56562	4.75966	4.37323	4.66171	8.50355	7.87123	9.44514	10.4061	9.33447	9.00563
COBS00829	14.7441	13.9449	14.0318	8.59656	6.68602	7.28275	11.6878	11.4523	10.7573	12.9106	12.9176	11.6896	15.0694	15.6956	15.0803	8.22274	8.09666	7.95387	11.6966	10.7745	12.194	9.73179	12.8997	12.2568
COBS00830	12.2246	10.5297	11.2594	6.24629	4.36716	4.58417	8.00171	6.53711	6.23794	7.34832	7.27381	6.86763	12.0642	12.5842	11.7534	4.27229	4.52574	4.89473	7.52047	7.40418	7.27987	4.00157	8.76101	8.38449
COBS00831	14.022	13.9592	14.3703	5.59073	4.00157	5.31079	6.72889	12.027	5.58432	14.9923	15.4661	5.53709	14.1604	15.3285	15.1343	4.27229	4.26473	4.25294	5.75419	8.38756	7.17943	4.00157	5.5195	8.23419
COBS00832	4.94899	4.54097	4.75006	5.50051	4.00157	4.00157	11.5122	10.7587	10.1829	12.2533	12.0712	10.7112	4.62026	5.35425	4.53523	4.27229	4.64182	4.61349	11.2272	10.0059	12.207	11.5141	12.4739	12.237
COBS00833	4.00157	4.84726	5.31979	6.86565	4.63148	4.00157	9.55304	9.80592	9.26942	11.4714	11.5933	9.23182	4.87008	5.28919	4.37999	6.0055	5.94336	6.25655	9.96859	9.68122	9.26777	9.34696	10.2017	9.83257
COBS00834	14.3438	12.7527	14.2972	10.1595	6.12349	8.76709	11.2689	8.4641	8.64288	10.582	10.9082	8.01828	13.5431	15.9512	13.6461	8.31299	8.35227	9.37706	12.6861	10.834	8.45355	10.3522	11.7893	10.1575
COBS00835	5.27434	6.38065	5.77925	7.14902	5.98027	4.00157	6.2017	5.67536	5.29847	5.20178	5.85654	5.40143	5.51999	6.07922	6.25427	5.9359	5.90238	6.20754	5.78392	5.43899	5.7592	4.00157	5.81799	5.87822
COBS00836	4.00157	4.54097	4.37895	4.47203	4.81061	4.00157	5.92042	4.78321	4.73743	4.00157	4.87603	4.89485	4.00157	4.00157	4.37999	4.27229	4.00157	4.43587	4.00157	4.00157	4.63121	4.00157	4.33579	4.00157
COBS00837	4.00157	4.38409	4.53377	4.57651	4.36716	4.00157	4.00157	4.00157	4.00157	4.00157	5.22066	4.00157	4.44071	4.97491	4.65334	4.00157	4.00157	4.25294	4.00157	4.00157	5.32561	4.00157	4.41045	4.62658
COBS00841	9.39654	9.77035	9.16743	10.7405	10.4807	10.4932	9.62717	9.06475	9.47126	8.92484	8.86195	9.09266	8.53465	9.0492	9.79168	10.0971	10.0788	10.1	8.90112	9.17795	9.14403	8.46721	8.36645	8.75103
COBS00844	4.72315	5.86318	5.36619	7.12223	6.25246	4.00157	5.34902	4.70236	5.54771	4.91966	4.00157	4.68136	5.05767	5.21973	5.68457	5.90695	5.51272	5.77189	4.95071	5.27619	4.95364	4.00157	4.93277	5.19517
COBS00846	6.39608	6.89925	6.69216	6.88715	6.70078	6.4487	6.97224	5.92029	6.0053	5.70832	6.2109	6.99815	6.39795	6.2992	6.72922	6.75109	6.86983	6.70958	6.92232	7.24748	6.33108	4.00157	6.16245	7.19296
COBS00847	11.2994	11.3929	11.2025	11.1741	10.9248	11.2752	10.7222	10.7409	10.8903	10.8121	11.3366	10.9104	11.1976	11.2471	11.4436	11.0397	10.9908	11.0558	10.7401	10.6955	10.7194	10.2326	10.8398	11.1065
COBS00848	9.44182	9.88888	9.96674	8.17882	6.5939	7.37086	8.59883	8.02447	7.93011	8.54489	8.21977	8.50659	9.89186	10.0228	10.2774	8.87094	8.52792	9.10659	9.17945	9.26337	8.10298	8.82993	9.95418	9.79536
COBS00851	11.1982	11.8336	12.1625	11.6157	11.3976	10.057	11.3846	10.5949	10.9072	10.5533	11.2368	10.568	11.5359	12.4237	12.011	11.2456	11.958	11.0196	11.9587	12.396	10.5105	10.6638	12.0548	11.6324
COBS00852	4.88089	5.33666	5.04887	4.87236	5.07627	4.00157	4.00157	5.28301	5.4302	4.00157	4.62456	4.00157	4.62026	4.44343	4.37999	4.38387	4.45613	4.50244	4.00157	4.83471	4.00157	4.00157	4.77775	5.19517
COBS00853	5.44388	4.54097	5.36619	4.57651	4.88559	4.00157	5.60289	4.00157	5.38807	4.00157	4.62456	4.48445	4.62026	4.44343	4.37999	4.54066	4.7389	4.50244	4.51538	5.49782	5.07583	4.00157	4.93277	4.92028
COBS00854	8.06807	8.19938	8.19721	8.14408	8.09864	8.02526	7.74923	7.58933	7.489	8.06367	8.1442	7.80599	8.0708	7.89737	7.87582	8.02318	7.66054	7.99043	7.6224	7.76017	7.11554	9.9803	8.34164	7.9708
COBS00855	6.48403	6.20688	6.4516	6.22908	5.90213	5.63905	5.69046	5.47861	5.38807	6.17154	7.02425	6.34713	6.61793	6.41021	6.33914	6.24015	6.23106	6.50992	6.04748	6.33331	6.35022	4.00157	6.59598	6.33573
COBS00856	6.13588	5.59206	5.8707	7.30782	5.95476	6.90591	6.14427	5.73421	5.54771	5.85257	6.88056	5.91622	5.67034	6.00886	5.78365	6.05856	6.26293	7.45016	6.30554	6.96477	5.48933	4.00157	6.26794	6.31283
COBS00857	6.91817	6.78299	6.15848	7.25137	7.84214	6.96931	7.43076	6.90086	6.83139	6.45636	6.38488	6.86763	6.50015	6.63088	6.59994	6.32763	6.60396	6.4939	6.20412	6.54887	6.94178	8.35186	6.44192	6.58389
COBS00858	7.78192	7.55544	7.01406	7.69908	8.08768	4.47832	7.62423	7.3526	7.04759	7.27129	7.55778	7.48483	7.15382	6.76039	7.43911	7.23122	7.22922	7.00024	7.06402	6.83954	7.34616	4.00157	6.84368	6.8878
COBS00859	7.03714	7.26517	7.0265	7.50661	7.88082	7.07857	7.49822	7.44405	7.03576	7.01119	6.84219	7.13646	7.10701	6.91612	7.08148	6.79681	7.0522	6.84077	6.84568	6.96477	6.86574	4.44244	7.08668	7.15591
COBS00860	7.73395	7.68099	7.43247	7.86329	8.344	7.98041	7.95466	7.47589	8.15227	7.49083	7.58099	7.9979	7.15382	7.0394	7.38223	7.22571	7.40496	7.22654	7.49587	7.50815	7.59186	7.66262	7.19401	7.43849
COBS00861	13.3133	12.939	12.5304	13.2942	13.8119	13.5899	13.3986	13.4651	13.4975	13.7174	13.9337	13.3271	12.7375	12.7427	12.6951	12.6079	12.742	12.6802	12.6379	12.8047	13.4861	13.7738	12.6092	13.1122
COBS00862	9.03207	8.84431	8.5853	9.1708	9.69348	8.96373	9.3139	9.14066	9.54921	8.55137	8.9881	8.99608	8.5692	8.5097	8.6376	8.63025	8.69378	8.53583	8.63998	8.85728	8.72458	9.77216	8.58699	8.6293
COBS00863	8.05699	8.28593	7.87566	8.85699	9.81112	7.84234	9.32316	9.23141	9.46692	8.54489	8.24892	9.04889	7.98792	8.11866	7.92952	8.03884	8.14392	8.09998	8.46207	8.50773	9.31068	6.04053	7.85065	8.11812
COBS00864	8.31111	9.82544	9.25338	10.7578	9.53954	7.10694	9.8051	9.02791	9.06651	8.18541	8.45047	8.61405	8.90741	9.22391	9.17776	9.20299	9.54765	9.40328	9.20228	9.69494	8.92824	7.00017	9.11147	9.58194
COBS00865	9.57553	9.32929	8.98157	9.75833	9.88242	9.29317	9.67376	9.17957	9.32319	8.19372	8.29156	9.27256	10.5	8.92423	9.25575	10.1887	9.30214	9.34712	11.2432	9.2317	9.17016	8.86771	8.28471	8.65361
COBS00866	10.3557	9.58271	9.02499	10.3135	11.463	10.8234	10.5673	11.0995	11.2292	10.0267	9.61475	10.7603	9.16987	9.30218	9.27911	10.1193	10.1686	9.99501	9.88018	10.0705	10.8528	10.8696	8.94181	9.39426
COBS00867	4.00157	4.66032	4.65157	4.57651	5.18399	5.41991	4.00157	4.35454	5.5099	4.00157	4.00157	4.95444	4.00157	4.44343	4.65334	4.46911	4.69219	4.43587	4.80775	5.63274	4.00157	4.44244	4.47319	5.10156
COBS00868	9.14594	10.2008	10.3014	10.4142	9.91525	8.6765	9.43273	9.64328	9.54098	8.73321	9.08807	9.50622	10.2269	10.3536	10.2034	10.5451	10.5641	10.453	10.46	10.3835	9.44728	8.48557	10.1346	10.0879
COBS00869	4.00157	5.76851	4.53377	5.50051	4.00157	4.00157	5.60289	4.49951	4.89811	4.00157	4.87603	4.00157	4.62026	4.00157	4.65334	4.46911	5.34678	4.86071	4.62923	5.37683	4.367	4.00157	4.66564	4.95972
COBS00871	10.3781	10.8065	10.7924	11.609	10.5401	11.0931	10.1133	9.4619	9.98787	9.59744	10.1343	9.55048	10.304	10.8191	10.6639	11.542	11.4586	11.6336	10.0547	10.2411	9.50383	11.0921	10.155	10.4173
COBS00872	4.36517	6.6889	6.0096	7.40702	6.00528	5.27175	6.25671	4.78321	4.64053	4.00157	5.77192	5.40143	6.39795	5.97217	6.06607	6.2288	6.20938	6.18742	5.81293	6.17847	4.81027	4.00157	6.21626	6.05878
COBS00873	10.2274	9.19345	8.94004	9.39923	10.1355	11.2768	9.04205	9.68611	9.78168	10.2636	9.93403	11.6471	8.95171	9.06562	9.03862	9.44831	9.32157	9.67438	9.2566	9.28351	9.41705	10.9662	8.38898	10.0351
COBS00874	5.97084	5.18159	5.10952	5.21568	6.31249	6.16397	6.36032	5.6448	6.21646	7.73904	7.27381	6.14945	5.05767	4.87534	4.7521	5.28685	5.14959	5.04643	5.40639	4.94267	5.63204	4.00157	4.81141	4.99739
COBS00875	9.73127	10.3309	10.0396	10.8779	10.1953	10.2356	9.53456	9.3124	9.39113	9.41089	9.33861	9.29771	9.83864	9.82018	10.2488	10.8016	10.8584	10.7597	10.0672	10.2643	9.18562	9.37017	10.1948	9.94324
COBS00876	8.44446	9.0558	8.8669	8.4866	8.30197	9.28298	7.97838	8.07708	7.34394	10.022	10.0124	8.50299	8.92973	8.31719	8.71966	8.66892	8.66362	8.97288	7.84604	7.62249	7.50359	9.89148	10.4508	9.43431
COBS00877	12.8296	12.7036	12.8536	12.8271	12.3524	13.1509	11.7538	10.6753	10.7223	11.6797	11.6732	11.1796	13.023	13.187	12.641	13.6774	13.5264	13.4108	13.3245	12.894	10.73	12.0021	11.7675	12.0932
COBS00878	6.13588	7.607	6.27074	7.00962	6.1007	5.87142	7.35992	6.26446	7.01179	6.24033	8.03123	6.80941	6.70536	5.63152	5.87526	6.88396	7.13241	6.34044	7.89061	8.09968	7.12639	4.44244	8.02888	7.68696
COBS00879	6.80166	4.66032	4.37895	4.00157	7.20111	6.91668	8.26844	7.21752	7.64397	7.37799	6.76212	7.22753	4.00157	4.00157	4.00157	4.00157	4.00157	4.25294	4.36585	4.00157	7.17943	7.00017	4.23816	4.00157
COBS00880	11.2051	10.2805	10.731	9.75976	9.47178	11.2628	9.61466	9.55544	9.60946	11.6951	11.3058	10.2602	10.1435	10.3636	10.2902	9.61689	9.60919	10.2985	9.74513	9.73668	9.69587	11.9525	11.6619	11.0068
COBS00881	7.14679	7.14179	7.06317	7.02903	7.41934	4.47832	7.03461	6.73764	6.41707	7.63267	6.67712	7.03908	7.13839	6.95246	7.10523	7.06831	7.01638	7.23128	6.89724	6.56127	7.09358	4.00157	7.18103	6.57441
COBS00882	15.4478	14.1064	14.0273	9.86457	9.1024	12.1239	9.49414	10.0233	9.83983	10.571	10.7004	10.9722	14.6614	15.294	14.8341	11.2706	10.7671	11.8586	10.1672	10.0168	10.5686	10.6544	10.7938	10.9922
COBS00883	18.5031	19.3337	18.6783	8.8756	6.6253	6.30558	7.1516	6.58262	5.47076	6.82824	7.55778	6.51927	18.8281	17.279	19.5571	8.1583	7.1545	7.74573	7.74555	7.26247	6.16711	4.00157	8.36076	8.28039
COBS00884	12.7107	13.1234	13.3182	4.33497	4.36716	4.00157	4.00157	4.78321	4.00157	4.00157	4.00157	4.00157	13.8205	12.3398	14.3228	4.27229	4.37323	4.00157	4.36585	4.45129	4.367	4.00157	4.23816	4.00157
COBS00885	7.8733	7.86841	7.90262	7.46478	6.57792	7.65811	7.01928	5.89536	6.8036	8.3945	8.35992	6.48956	7.52896	6.82086	7.52039	7.03713	6.79389	7.60014	6.94696	8.10381	5.81807	8.97111	7.71418	7.63884
COBS00886	4.72315	6.03332	5.57248	5.64717	4.95404	6.55038	5.22791	4.78321	6.12683	5.94014	6.01026	5.65824	5.62235	5.41553	5.41429	5.42776	5.58726	5.35299	4.88249	4.99172	5.1835	4.00157	6.02752	5.52358
COBS00887	8.53094	8.79728	9.22174	8.32165	7.56938	8.77001	6.97224	7.30899	7.20354	8.8844	8.54742	7.65118	8.75073	8.39081	8.90809	7.48685	7.66819	7.78152	6.89724	7.04532	6.74324	7.2808	9.00264	8.03291
COBS00888	8.12751	8.56206	8.27649	9.78949	10.194	9.59281	7.70244	7.51472	7.7767	7.55706	7.1231	7.51394	7.38018	8.00377	8.63357	9.52346	9.39674	9.52385	7.68892	8.1565	7.0486	4.00157	7.05377	7.11141
COBS00889	8.05699	8.28593	7.67906	9.57049	10.6565	10.0866	9.85701	9.24293	9.91336	8.46482	8.55909	9.20327	7.58663	7.76231	7.74707	9.74609	9.8295	9.47623	9.46177	9.71664	9.45154	9.09171	8.33779	8.79738
COBS00890	4.00157	4.54097	4.91335	4.74063	4.00157	4.00157	4.00157	4.60994	4.00157	5.02391	5.93575	4.75988	4.75649	4.87534	4.37999	4.46911	4.37323	4.43587	5.22942	4.63505	5.32561	4.00157	5.79373	5.62767
COBS00891	4.51443	4.99675	4.75006	6.24629	6.02981	4.00157	5.69046	5.2391	4.00157	4.00157	4.00157	4.68136	4.00157	4.00157	4.7521	5.06201	5.27726	5.19987	5.01375	5.20316	5.36893	4.44244	4.62342	5.22446
COBS00893	4.00157	4.99675	4.37895	5.64717	4.81061	4.00157	5.08996	4.00157	5.47076	4.00157	4.00157	4.00157	4.00157	4.44343	4.53523	4.84678	4.82376	4.98896	4.62923	5.03811	4.367	4.00157	4.70516	5.1338
COBS00895	4.62807	5.0626	4.53377	5.82595	6.12349	4.00157	5.29025	5.28301	4.82212	4.00157	5.0648	4.95444	4.75649	4.62407	4.65334	4.88682	5.30095	5.04643	5.12777	5.27619	5.36893	4.00157	4.96043	5.06816
COBS00896	4.00157	4.00157	4.65157	4.93054	6.5454	4.00157	6.97224	4.98335	5.38807	5.3522	5.22066	5.28722	4.87008	4.44343	4.53523	4.80452	4.86276	4.66171	4.88249	5.03811	6.09992	4.00157	4.70516	4.68519
COBS00898	5.22726	4.99675	5.98302	6.36082	6.75833	6.79337	4.59308	5.09424	5.29847	6.95283	6.5865	5.56859	4.96909	4.44343	4.7521	5.40553	5.253	5.97884	5.22942	5.49782	5.52672	7.58493	8.51547	6.99708
COBS00899	10.6566	10.9347	11.0443	9.02838	8.83445	9.42319	9.08624	9.53871	10.27	9.77921	9.52251	9.92723	10.8619	11.3087	10.7921	9.30463	9.42732	9.37918	9.65978	9.54991	9.71729	11.0589	9.992	9.61828
COBS00900	12.792	12.7346	13.2395	12.1676	11.6872	12.0574	11.7589	11.7373	11.7068	13.1305	12.9417	12.2606	13.1163	13.0417	12.6798	12.2397	12.2508	12.2662	12.0167	11.9679	11.7463	12.287	13.6077	12.6436
COBS00901	11.2548	10.1061	10.5412	9.61703	9.59849	10.1168	10.2746	10.2797	10.4233	10.6317	10.4636	10.501	10.6391	11.2014	10.7009	10.195	9.92224	10.0878	9.95969	10.2232	10.4425	10.0902	10.432	10.416
COBS00902	10.5175	9.68555	9.73999	9.66059	10.0938	10.417	10.2029	10.2852	10.4803	10.2616	10.1067	10.4165	9.80284	9.75844	9.73461	10.0493	10.1626	10.0478	10.0877	9.94055	10.4889	10.0721	10.0746	9.82287
COBS00903	6.04418	6.11057	5.8105	5.75255	6.18956	5.09816	4.42128	5.44222	5.68767	5.75833	5.22066	5.20339	5.62235	6.04452	5.68457	5.90695	5.06397	5.9907	5.75419	6.31862	5.7592	4.00157	5.19778	5.50157
COBS00904	10.7606	11.5705	11.3572	12.1741	12.5287	11.9923	12.3915	10.9317	11.1022	10.6723	11.022	10.8885	12.2595	10.2974	11.6047	11.6569	10.5883	10.9492	12.7862	11.2986	11.0976	11.0911	10.1184	10.9094
COBS00909	6.06773	6.76775	5.74719	7.18397	7.56145	6.06698	7.56262	6.86486	6.63985	6.51219	6.2109	6.64546	5.9239	5.21973	6.04051	6.95931	7.10428	6.42784	6.84568	7.12149	6.79902	4.00157	5.96504	6.31283
COBS00910	5.59065	7.511	6.33379	9.1751	8.25378	7.22368	8.74393	7.7539	7.83871	6.48456	6.67712	7.49217	6.54849	6.07922	6.78958	8.91899	9.62881	8.71751	9.23462	9.63639	7.74653	4.00157	7.86683	8.46915
COBS00911	11.8532	11.2215	11.5973	7.80877	7.8356	8.16536	10.0552	9.9194	9.75347	10.0173	10.261	10.1959	11.4659	12.4516	11.8514	8.65682	8.41701	8.33001	9.58265	9.50073	9.87328	10.4627	9.69327	10.2
COBS00912	5.6896	5.18159	4.53377	5.33168	5.45123	5.6947	6.30953	5.09424	4.00157	4.00157	4.87603	4.68136	4.44071	4.87534	4.00157	4.75966	4.89988	4.66171	5.27658	5.20316	5.78899	4.00157	4.84358	4.95972
COBS00913	9.21217	10.1238	8.86007	11.3087	11.8375	9.32133	12.2229	11.1675	11.5018	9.22515	9.58085	10.627	8.63048	8.52166	9.04772	9.85059	10.1679	9.47623	10.7122	11.0917	11.3571	11.1631	9.01112	10.2253
COBS00914	4.36517	5.42853	4.53377	4.74063	5.36949	4.00157	5.16141	4.35454	5.29847	4.46639	5.58241	4.48445	4.87008	4.44343	4.65334	4.60343	4.26473	4.43587	4.51538	4.99172	4.00157	4.00157	4.96043	4.68519
COBS00915	4.00157	4.54097	4.37895	4.98486	4.81061	4.6728	5.50816	4.78321	4.96746	4.00157	4.62456	5.06232	4.44071	4.44343	4.37999	4.00157	4.26473	4.43587	4.36585	4.32021	4.51701	4.00157	4.57792	4.28283
COBS00916	5.44388	6.63932	5.49449	7.96645	9.10511	6.65797	9.68337	8.37878	9.57965	6.45636	7.35707	7.99276	5.96153	5.85523	5.45709	5.75108	6.24177	6.10366	6.38144	7.04532	8.78335	9.74706	5.98621	7.21713
COBS00917	4.72315	4.92543	4.53377	4.57651	5.36949	4.94265	5.16141	5.28301	4.00157	4.65614	5.22066	4.75988	4.96909	4.00157	4.65334	4.38387	4.45613	4.25294	4.36585	4.32021	4.51701	4.00157	4.62342	4.83505
COBS00918	5.83823	6.6889	5.74719	8.23767	8.74328	4.47832	9.19114	7.30899	7.65168	4.91966	7.32986	6.69802	6.10181	5.93439	6.16356	5.9359	6.6984	6.19752	6.67837	7.44407	7.82132	7.36317	6.39667	7.43336
COBS00920	4.00157	5.33666	4.91335	5.98196	5.32615	4.00157	6.36032	5.6448	5.20034	4.00157	4.62456	5.36471	4.87008	4.62407	4.9158	5.18094	5.20265	4.92735	5.62733	5.96456	5.41056	4.00157	5.15492	5.81175
COBS00921	5.36249	5.0626	4.91335	5.33168	5.66578	5.87142	5.45763	5.54801	5.84223	4.65614	5.58241	5.43694	7.72648	5.28919	5.16953	5.28685	5.51272	4.95872	6.22504	5.79884	6.23101	4.44244	4.57792	5.22446
COBS00922	10.4694	11.4842	10.959	12.5707	12.7631	11.2414	11.8561	10.9359	11.1435	11.021	11.6705	10.8747	10.5797	10.5917	11.1054	12.0423	12.0064	11.9521	11.3355	11.5601	11.0193	11.6523	11.6212	11.3392
COBS00923	4.51443	5.18159	4.00157	5.08422	4.88559	4.00157	4.92743	4.00157	4.82212	4.46639	4.87603	4.00157	4.00157	4.00157	4.00157	4.65994	4.64182	4.66171	4.62923	4.83471	5.32561	4.00157	4.70516	4.4872
COBS00924	8.57812	9.21562	9.00034	8.80243	7.96118	8.28482	7.23337	7.34398	7.86542	9.03513	9.08	7.6771	9.32268	8.56854	8.8641	8.01053	8.58937	8.33657	7.50412	7.55135	7.43577	8.40428	9.01474	8.36855
COBS00925	7.76156	8.56206	8.88048	8.50723	8.57324	8.10168	8.34938	8.18645	8.03965	8.1345	7.99724	8.4775	8.65749	8.64159	8.79008	8.97851	9.08063	8.39637	9.24198	9.14231	8.11921	5.28644	9.1624	8.73041
COBS00926	6.13588	6.82774	7.36593	6.15793	6.29278	6.55038	6.93998	6.99255	7.09394	7.13857	7.15456	7.4626	7.87245	7.85059	6.69802	6.2955	6.29406	6.63172	6.92232	6.7777	7.45303	4.00157	7.32938	7.3969
COBS00927	10.2865	9.28542	9.45047	9.62019	10.8588	10.7162	10.5529	10.1968	10.6128	10.4841	10.2857	10.243	9.53253	9.38625	9.61527	9.91119	9.96454	9.77096	9.74686	9.81041	10.2588	11.0881	9.68042	9.4708
COBS00928	10.8295	10.7853	10.9405	10.5057	10.1329	10.5324	10.1536	10.1226	10.4222	11.331	11.1019	10.4543	10.8826	10.898	10.7209	10.5336	10.4178	10.46	10.2643	10.0883	10.1864	10.9063	11.2728	10.5631
COBS00929	5.59065	6.51615	6.4516	7.36209	6.81357	5.82348	7.37198	6.3733	6.0053	5.27975	5.35526	6.06946	6.47532	6.71856	6.61678	7.11084	6.80801	6.72327	6.90983	7.20155	5.7592	4.44244	6.49286	6.72728
COBS00930	12.8024	12.5362	11.9614	12.8744	13.6671	12.7935	13.6226	13.8385	13.8287	13.7832	13.5088	13.6593	12.3181	12.1006	12.0523	12.1878	12.0714	11.7633	12.5776	12.7563	13.842	14.1159	13.262	12.7532
COBS00931	12.1937	12.4059	12.0731	12.8269	12.6825	12.0232	12.3293	12.5126	12.6072	12.6024	12.4718	12.4993	12.1123	12.0118	12.0594	12.7287	12.6737	12.427	12.4894	12.5545	12.4186	12.5347	12.8551	12.4568
COBS00934	8.41009	8.74484	8.53894	9.51564	9.4051	9.18568	9.86126	8.45619	9.1033	10.4342	10.4481	10.2708	8.19419	8.32404	8.54199	9.08913	8.98486	8.98265	9.17176	9.67431	8.78335	9.74706	10.3996	10.1888
COBS00936	4.72315	5.51326	4.37895	6.08267	4.88559	4.00157	6.02119	4.00157	4.00157	5.48382	6.08065	5.56859	5.34641	4.44343	4.00157	4.38387	5.62279	4.50244	4.95071	5.40836	4.95364	4.00157	5.40561	5.19517
COBS00937	9.52032	9.9726	9.78756	10.1778	10.4308	9.00897	10.5686	9.48343	9.38884	9.55945	9.92505	9.75037	10.1473	9.95178	9.96332	9.87687	9.79345	9.78219	9.50728	9.86607	10.0926	8.1517	9.67433	9.68512
COBS00938	6.13588	6.25251	6.47026	8.07195	8.66813	7.72017	7.71192	6.95887	7.10529	6.51219	5.93575	6.78542	8.08682	7.59048	6.01442	8.82663	9.24225	8.57516	9.09523	9.07879	5.1312	4.00157	5.8535	7.05204
COBS00939	4.36517	4.76009	4.37895	6.32909	6.02981	5.96209	4.72355	5.09424	5.87093	5.80636	6.32938	5.74155	5.28168	4.7611	4.98643	5.35964	5.20265	6.28511	6.0942	6.22686	5.52672	4.00157	5.19778	5.75943
COBS00940	11.4673	10.7973	11.2345	11.0964	10.8859	11.744	10.9202	10.4876	10.6957	11.6995	12.4367	10.9806	11.1442	11.3402	10.9223	11.1451	11.0319	11.1264	10.8725	11.0448	10.7698	11.6243	11.5392	11.2338
COBS00941	8.97451	8.4819	8.67766	8.24178	8.47164	8.76709	8.64884	8.68319	8.66199	8.8997	8.76455	9.09983	8.95606	8.6361	8.51597	8.54527	8.41475	8.4192	8.7849	8.64435	8.59157	7.49062	9.14819	8.82876
COBS00942	8.77313	8.71789	8.66595	8.8756	9.13463	9.13445	8.71606	10.9109	8.8064	13.3501	13.9751	9.05136	8.92084	8.7472	8.58434	9.13343	9.10044	8.98265	8.95291	9.44333	9.41705	4.44244	9.4557	9.21152
COBS00943	11.4066	11.2838	11.0421	11.0274	11.2855	11.7376	11.0707	11.2203	11.1731	11.014	10.703	10.9558	11.3292	11.0936	11.3076	11.452	11.3537	11.4239	11.1334	11.0734	11.1647	10.2979	10.9833	10.6457
COBS00944	5.07063	4.38409	4.37895	4.33497	5.07627	4.00157	4.00157	5.14499	5.09127	5.6015	4.00157	4.00157	4.00157	4.00157	4.37999	4.38387	4.37323	4.56086	4.00157	4.00157	4.00157	4.00157	4.00157	4.28283
COBS00945	8.43594	7.89625	8.21342	9.74683	9.68444	10.9027	8.82445	8.74615	8.72514	7.92061	8.15964	8.67295	7.6954	7.96039	8.03734	9.9389	9.53315	9.86676	8.20462	8.01877	8.69606	8.97111	7.27759	7.9169
COBS00946	5.31935	4.54097	4.9838	4.57651	4.81061	4.00157	4.00157	5.36559	6.32054	6.36801	5.35526	5.93928	4.75649	4.62407	4.00157	4.46911	4.52574	4.43587	4.51538	4.63505	5.23313	4.00157	5.19778	4.99739
COBS00952	7.42363	7.79637	7.80596	9.37328	9.34668	8.41766	9.15356	8.11279	8.49293	8.03618	8.21977	8.33067	7.66363	7.71081	7.8129	9.77713	9.51323	9.56994	8.62503	8.5507	8.62977	9.88229	7.48131	8.36051
COBS00953	4.00157	4.00157	4.37895	4.57651	4.36716	4.00157	4.83244	4.00157	4.00157	5.6015	5.68094	4.34381	4.00157	4.62407	4.00157	4.65994	4.45613	4.61349	4.72447	4.63505	4.367	4.00157	4.52828	4.68519
COBS00954	4.00157	5.12398	4.9838	5.46877	4.51723	4.00157	4.00157	5.76259	5.65422	6.27342	6.01026	5.56859	4.87008	4.44343	4.65334	4.71169	4.7389	4.82511	4.72447	5.03811	4.00157	4.00157	6.84368	6.39134
COBS00960	4.00157	4.92543	4.65157	5.36762	4.72705	4.99763	4.00157	4.70236	4.82212	5.98173	6.27146	5.11173	4.00157	4.7611	4.53523	5.31168	4.78259	5.22321	5.12777	5.37683	4.00157	4.00157	6.3258	5.64742
COBS00961	7.82834	8.15406	7.70229	10.0997	10.1631	9.42875	9.07166	8.11782	8.221	8.23458	8.69223	8.51019	8.07883	7.74193	7.55507	9.99837	10.4839	9.56809	9.41912	9.38863	7.92971	8.61346	8.02648	8.60003
COBS00962	6.32132	5.47171	5.16646	7.04817	7.18044	5.6672	7.06479	5.84395	5.75188	5.65612	5.0648	5.62912	5.21259	4.97491	5.53805	6.27364	7.01638	6.34044	6.34403	5.92515	6.00453	4.00157	5.03839	5.70473
COBS00963	5.22726	5.38358	5.84097	6.87644	7.89348	4.00157	6.47948	5.79032	5.34422	4.79992	5.58241	6.44374	5.34641	5.06398	5.41429	6.90491	7.24473	5.79974	6.43567	6.33331	5.23313	4.00157	5.53486	4.92028
COBS00964	5.36249	4.84726	5.04887	5.56144	5.75988	4.00157	4.00157	4.98335	4.00157	4.00157	4.00157	4.48445	4.00157	4.62407	5.11245	5.83148	5.14959	4.43587	4.36585	4.55127	4.00157	4.00157	4.41045	4.00157
COBS00965	8.65713	8.58355	8.97209	9.86057	9.02712	9.51311	7.1516	5.9687	5.54771	6.89193	7.30211	6.73616	7.75689	8.49764	9.18877	9.78917	9.24607	9.87951	6.538	6.30376	6.42415	4.00157	6.37346	6.42362
COBS00966	8.92675	9.78525	10.2331	9.5224	8.13637	9.42134	7.52001	7.04694	6.5751	7.78389	8.20497	7.64462	9.62017	9.62087	10.0473	8.56915	8.81873	9.3834	7.72458	7.74433	7.51185	8.61901	8.79229	8.68611
COBS00970	4.62807	5.12398	4.75006	5.80197	6.67109	6.14514	6.58899	5.84395	6.37929	5.11707	6.38488	5.68666	4.62026	4.62407	4.65334	4.54066	4.89988	4.43587	5.07255	5.20316	5.81807	4.00157	4.77775	5.03348
COBS00971	10.3111	11.5423	11.6403	12.7787	12.0445	11.6771	11.4374	10.2752	10.6505	10.3735	11.0919	10.1333	10.7219	11.362	11.5444	12.214	12.1024	12.1662	11.5703	11.6646	10.5478	10.1716	11.251	11.1235
COBS00972	6.64448	6.15961	6.24904	9.12265	8.66446	8.56305	9.69055	9.44604	9.61926	8.41596	8.45047	9.21652	5.80368	6.2094	6.35954	8.58839	8.39193	8.25351	8.32065	9.38694	9.81984	8.46721	8.02648	9.41894
COBS00973	9.98682	10.5164	9.8371	11.2371	11.8657	10.3197	11.7595	11.4278	11.9393	11.2106	11.3601	11.7704	9.85271	9.66999	9.69656	11.2382	10.923	10.5701	11.2191	11.443	11.5613	11.1847	11.2801	11.4932
COBS00974	5.01193	5.0626	4.75006	5.29445	4.95404	4.00157	5.01248	5.14499	5.34422	4.00157	5.58241	5.11173	4.87008	4.44343	5.05165	5.57203	5.51272	5.46854	5.44638	5.77647	4.51701	4.00157	5.08678	5.06816
COBS00975	11.1818	10.7296	10.787	11.1464	10.9309	11.6337	10.6095	10.409	10.4836	10.804	10.6765	10.7655	11.1173	11.0735	10.9362	11.95	11.6789	11.8024	11.3071	11.2432	10.2709	8.1517	10.9033	10.8122
COBS00976	6.88041	6.72098	6.47026	7.72289	7.20111	6.23667	6.02119	6.68327	7.11656	6.33722	6.38488	6.71085	6.86515	6.5372	6.39943	7.50054	7.26007	6.9834	7.2331	7.37006	6.45965	4.00157	6.58934	6.76091
COBS00977	9.31312	9.69741	9.09942	10.1713	11.0263	9.77975	10.3685	9.89039	10.129	8.3506	8.77459	9.2405	8.68925	8.88775	9.41657	9.90609	10.1666	9.76289	9.82571	9.84283	9.68685	8.01496	8.00474	8.96914
COBS00978	10.8906	11.252	11.0697	11.5432	11.2232	10.714	12.8211	12.4217	12.5252	11.1123	11.5458	12.1291	11.0759	11.3078	10.9946	11.0335	11.2369	10.829	12.438	12.5691	12.433	11.1517	11.5049	12.2704
COBS00979	5.27434	5.55334	5.22022	5.96082	6.00528	4.00157	6.80288	6.81537	7.79767	5.70832	6.27146	6.14945	5.57231	5.41553	5.27454	5.55251	5.90238	5.52206	6.2659	6.85956	6.78529	4.00157	6.11586	6.49608
COBS00980	5.01193	5.62952	5.53415	7.17532	6.4069	5.45396	9.8029	10.3431	10.0413	8.41596	9.21878	9.53294	5.80368	5.58125	5.78365	6.80428	6.50251	6.44466	9.12739	9.46913	9.71552	8.79603	8.34164	8.76327
COBS00981	10.487	10.4927	10.3264	10.2518	9.68444	9.77831	10.7396	10.7048	10.8105	10.5725	10.5854	10.5145	10.6269	10.5265	10.4757	10.273	10.229	10.1504	10.5713	10.7292	10.872	10.7821	10.9153	10.8351
COBS00982	10.5285	10.3954	10.4634	10.28	9.82105	9.94651	9.99276	10.4029	10.1602	10.121	10.1028	10.6948	10.5498	10.6499	10.5922	10.4491	10.4246	10.3752	10.5368	10.444	10.4826	10.5171	10.694	10.9321
COBS00983	12.0192	11.7083	11.6787	10.7252	10.6921	11.1418	11.695	11.6829	11.5197	12.0859	12.3234	11.3968	12.1868	12.3686	11.8742	11.4453	11.296	11.2714	11.671	11.6871	11.8851	10.991	11.7641	11.6807
COBS00984	9.97073	9.50158	10.0606	8.60615	8.7537	9.12078	9.00799	9.28813	9.46909	10.4516	9.89318	9.53822	10.1145	9.93402	9.78444	9.28905	9.25872	9.15802	9.37293	9.36306	8.86244	8.51565	10.1335	9.48317
COBS00985	5.22726	5.70104	5.89973	5.96082	5.41113	6.35501	6.25671	5.70514	5.38807	6.69134	6.80273	6.48956	5.28168	5.47355	5.27454	5.23529	4.89988	4.92735	4.72447	5.37683	5.84648	4.00157	5.55001	5.4089
COBS00989	5.22726	5.12398	4.00157	4.33497	4.95404	4.33945	4.00157	4.60994	4.00157	4.46639	4.00157	4.68136	4.87008	4.44343	4.53523	4.65994	4.69219	4.56086	4.51538	4.00157	4.81027	4.44244	4.57792	4.78856
COBS00990	7.71994	7.74369	7.59048	9.026	9.66985	9.7913	9.22776	8.27462	8.9594	8.62689	8.9967	8.58367	7.2139	7.96917	7.58892	7.82778	7.94787	7.65386	7.50412	7.60503	8.53634	9.31998	7.83154	7.83398
COBS00991	10.2397	10.8733	11.0322	11.7016	11.2915	11.2101	11.1868	9.92942	10.4322	10.287	11.1039	9.84719	10.1435	11.1591	10.763	10.6149	10.6634	10.6667	10.1399	10.5407	10.2709	10.3802	10.3533	10.3715
COBS00992	5.59065	5.80089	5.84097	6.31294	5.95476	4.33945	6.36032	5.70514	4.73743	4.00157	6.38488	5.32668	5.40739	5.63152	5.81495	5.57203	5.67414	5.24602	4.72447	5.27619	5.01687	4.00157	5.40561	5.38445
COBS00997	6.61386	8.30677	8.03026	8.82997	8.33013	7.171	7.81226	6.92436	7.36291	6.97256	8.04792	6.79747	7.31326	8.2396	8.33426	7.87396	7.31982	7.67479	7.40185	7.40418	6.5112	5.14257	7.72606	7.76643
COBS00998	5.36249	6.96726	6.39398	7.44339	6.8536	4.00157	5.50816	5.14499	4.52469	5.6015	6.1474	5.65824	6.37114	6.95246	6.77473	6.38965	6.08322	6.23717	6.24563	6.25816	5.56291	4.00157	6.59598	6.56486
COBS00999	4.94899	4.84726	5.31979	5.89521	5.98027	4.00157	6.1733	5.54801	5.38807	4.00157	5.0648	5.15866	4.62026	4.7611	5.05165	6.32763	6.74329	6.21749	6.7077	6.65659	6.00453	4.00157	4.57792	5.56635
COBS01000	4.94899	4.84726	4.53377	8.85966	11.217	8.91967	9.35962	8.70003	9.69536	7.68093	7.62629	8.68572	4.96909	4.44343	4.53523	9.77433	11.1329	11.4058	10.2425	10.5944	7.52822	7.72599	6.45667	8.58172
COBS01001	7.99447	7.58145	7.33643	8.78566	9.06942	8.63219	11.088	10.745	11.5306	9.85173	9.80295	11.1233	7.62014	7.53224	7.37252	10.0455	9.95912	9.25106	11.0088	11.1381	10.8218	9.13881	8.78383	10.2887
COBS01002	7.71994	8.94068	8.45969	13.7456	11.3389	10.7609	7.99398	7.1197	7.61272	7.10334	7.30211	7.44002	7.40608	8.47321	8.04343	15.5822	14.4396	15.416	7.80669	8.04051	7.37364	4.00157	6.90852	7.11141
COBS01003	10.0729	10.7239	10.2211	11.1519	10.9225	10.8029	10.8977	10.6565	11.0589	10.4095	10.3575	10.7128	10.0407	10.0478	10.509	10.5887	10.4829	10.471	10.0699	10.5745	10.8333	10.6516	10.3689	10.6462
COBS01004	4.00157	4.99675	4.65157	5.25583	5.48993	4.00157	6.45648	6.50589	6.5751	6.39811	6.32938	7.20082	4.75649	4.62407	4.53523	7.50507	5.87429	6.19752	6.95911	7.4309	6.52796	4.00157	5.33475	6.93986
COBS01005	8.05699	8.03408	8.54322	8.17021	8.51723	9.13445	7.91423	8.72985	8.57188	7.69274	7.7744	8.49212	8.03822	8.02076	8.48947	8.54308	8.48112	8.77491	8.41066	8.08302	8.12993	4.00157	7.76402	7.83785
COBS01006	15.0931	13.6523	14.5046	11.0178	11.4417	12.9128	12.508	12.7018	12.3535	13.073	13.1573	12.5831	13.7737	14.3571	14.1231	12.0799	11.9743	12.3388	11.5902	11.3138	12.6749	13.8668	12.435	11.9555
COBS01007	4.72315	5.70104	5.77925	6.28003	5.87496	6.49321	4.00157	4.00157	4.64053	4.65614	4.00157	4.00157	5.40739	5.35425	5.64962	5.06201	5.27726	5.22321	4.51538	4.00157	4.00157	8.66803	5.01317	4.62658
COBS01008	4.36517	5.0626	4.91335	4.00157	4.81061	5.09816	4.92743	5.40459	5.03153	4.46639	5.22066	4.75988	4.62026	4.44343	5.11245	4.27229	4.00157	4.25294	4.36585	4.63505	4.367	4.00157	4.41045	4.56146
COBS01010	4.00157	5.62952	5.04887	4.57651	4.00157	4.00157	4.92743	4.78321	4.00157	4.00157	4.62456	5.11173	5.21259	4.44343	4.98643	4.65994	4.93536	5.01816	4.62923	5.03811	4.00157	4.00157	4.52828	4.87883
COBS01011	4.51443	5.42853	4.53377	4.47203	4.72705	6.47854	4.00157	4.35454	4.89811	5.02391	4.00157	5.15866	4.87008	4.62407	4.9158	4.60343	4.64182	4.70643	4.51538	4.55127	4.00157	4.00157	4.52828	4.39871
COBS01012	5.07063	6.18346	4.53377	6.24629	6.12349	7.59321	5.08996	5.79032	5.09127	5.6015	5.85654	6.12991	5.84507	5.06398	4.37999	5.59122	5.47353	6.50193	4.80775	5.60699	6.16711	4.00157	5.17658	5.10156
COBS01014	6.0202	6.60525	5.04887	6.99982	5.95476	5.6102	6.30953	5.28301	6.0553	6.24033	6.53884	5.62912	6.28732	5.35425	5.45709	5.66495	5.88841	7.16338	5.32166	5.55371	5.1312	4.00157	5.43937	5.64742
COBS01015	5.01193	4.66032	5.8707	6.70501	4.36716	7.34737	5.08996	4.60994	4.37248	4.91966	4.87603	4.48445	4.87008	4.00157	5.22342	4.54066	4.37323	6.63898	4.00157	4.32021	4.00157	4.44244	4.47319	4.39871
COBS01016	9.17944	8.28593	9.24553	8.99958	10.0565	8.99154	8.20961	8.78454	7.79071	7.68093	8.54742	8.63725	8.63048	8.75228	9.11565	9.16508	9.14201	9.79016	7.60719	7.45061	8.68523	4.75941	8.36266	8.47164
COBS01017	10.2663	10.4814	10.5154	11.3774	10.8922	10.9133	10.5076	9.73589	10.2155	9.47692	9.92955	10.0714	10.3159	10.5774	10.4055	11.0562	11.0052	11.1264	10.5497	10.7299	9.9849	9.94763	10.667	10.7285
COBS01018	8.92675	8.72564	8.58115	9.16	9.80279	9.12535	11.2011	11.1215	11.6415	9.82263	9.70144	11.5602	8.01329	8.11866	8.48052	8.8067	9.193	8.67505	10.7591	10.7569	11.308	9.24664	9.11034	11.0064
COBS01019	11.1938	10.1282	10.537	10.5781	9.1791	10.8833	12.2458	11.4765	10.1868	11.6514	11.6918	11.258	10.4188	10.6928	10.2825	10.2151	9.42956	10.2311	10.4097	11.0286	12.1828	12.9475	11.9256	11.9057
COBS01020	5.17783	4.84726	4.37895	4.80946	4.88559	4.00157	5.40469	5.19318	4.89811	4.65614	4.62456	4.00157	4.00157	4.44343	4.00157	4.46911	4.26473	4.70643	4.36585	4.83471	4.63121	4.00157	4.57792	4.73885
COBS01021	7.3249	6.00651	5.92811	11.4611	7.40164	11.1231	5.22791	5.67536	6.21646	5.65612	5.58241	6.04866	7.16908	6.5372	6.01442	6.50573	6.99197	8.04224	6.32492	6.21093	6.21005	4.00157	6.17158	6.17923
COBS01022	10.2983	12.493	12.2975	13.5296	11.8813	12.3999	9.29833	8.68658	9.06937	7.76164	8.45047	8.48483	11.3284	11.9552	12.7369	12.9871	13.1412	13.8941	10.3655	10.5596	7.80131	4.75941	8.94054	9.46707
COBS01023	4.00157	4.38409	4.53377	4.66402	4.51723	5.6672	4.00157	4.85579	4.00157	4.00157	4.00157	4.00157	4.00157	4.44343	4.37999	4.84678	4.64182	4.78773	4.00157	4.63505	4.00157	4.00157	4.23816	4.00157
COBS01024	6.95494	7.95695	8.73485	10.3194	9.79776	11.6212	6.1733	4.00157	4.00157	5.02391	5.85654	4.83041	7.36704	8.08676	8.50719	10.416	10.2379	10.2537	5.32166	4.99172	5.1312	5.21712	4.47319	4.68519
COBS01025	12.6656	11.351	11.9446	9.60912	6.87966	11.0348	8.87992	5.6448	5.29847	5.27975	5.58241	5.15866	12.5307	13.0068	11.9911	8.8779	5.60516	7.71576	10.6998	5.27619	6.3877	4.62267	4.23816	5.8943
COBS01026	6.09085	4.76009	4.9838	4.80946	4.00157	7.43908	4.42128	4.70236	4.00157	4.46639	5.77192	4.59162	5.21259	5.28919	4.65334	4.38387	4.37323	5.93023	4.36585	4.55127	4.63121	4.00157	4.41045	4.00157
COBS01027	5.31935	4.54097	4.65157	5.82595	5.69798	4.94265	6.33517	6.18659	5.5099	5.27975	6.08065	5.50469	4.62026	4.62407	4.00157	5.51245	5.5506	5.33246	5.07255	5.79884	5.59799	4.44244	5.95432	5.77712
COBS01028	4.00157	4.38409	4.37895	4.57651	4.95404	4.00157	4.59308	4.70236	5.54771	6.022	6.1474	5.28722	4.75649	4.62407	4.37999	4.54066	4.96936	4.74829	4.95071	4.70844	4.95364	4.00157	4.66564	4.92028
COBS01030	4.36517	4.00157	4.00157	4.47203	4.00157	4.00157	4.72355	4.00157	4.00157	4.00157	5.0648	5.11173	4.44071	4.00157	4.37999	4.54066	4.00157	6.57977	4.51538	4.45129	4.00157	4.00157	4.00157	4.00157
COBS01031	11.19	12.1984	12.0285	11.8707	11.6333	10.8873	12.3801	10.4632	10.7086	10.5694	10.9575	10.3905	11.1241	11.7855	12.2352	11.3094	11.7069	11.1451	12.7064	12.5124	10.7203	10.7534	11.4014	11.2841
COBS01034	6.0202	7.29702	6.47026	7.65644	7.77527	4.00157	7.88104	6.53711	6.63985	5.85257	6.91789	6.38011	6.37114	6.24002	6.99505	5.92151	6.61209	5.82696	7.48758	7.634	6.35022	4.00157	6.37346	6.76091
COBS01035	6.20064	7.94368	7.17891	8.26217	8.50082	6.04668	8.35542	6.78994	7.9174	6.20639	6.48944	6.85618	7.07491	7.18347	7.52914	6.78173	7.31004	6.34044	8.19452	8.29305	6.49424	4.62267	7.03942	6.92518
COBS01036	5.91947	7.23258	6.79827	7.84715	7.38372	4.6728	7.79453	5.47861	5.92641	5.3522	6.38488	6.14945	6.57203	7.1986	7.15155	6.43924	7.04036	5.8667	7.52047	7.86148	5.90141	5.41255	6.77567	6.8878
COBS01038	4.94899	5.23597	4.83614	5.33168	5.81877	4.82007	6.36032	5.47861	6.12683	5.94014	6.08065	5.20339	5.13829	4.62407	4.7521	4.60343	4.37323	4.35662	4.80775	4.70844	6.02905	4.62267	4.84358	5.16497
COBS01039	5.27434	7.14179	5.45337	7.40702	8.18346	6.06698	8.06214	6.82791	7.21405	6.39811	6.98969	7.14584	6.66234	5.97217	5.93278	5.51245	6.09521	5.33246	6.22504	6.74571	6.96624	4.00157	6.20744	6.36937
COBS01040	5.07063	4.76009	4.83614	4.87236	4.95404	4.00157	4.92743	5.28301	4.00157	5.11707	4.62456	4.48445	4.96909	4.97491	5.22342	4.54066	4.58682	4.89473	4.72447	5.0822	4.95364	4.44244	5.01317	5.10156
COBS01042	7.43227	8.42109	8.83936	8.49006	7.49634	8.18305	7.55209	7.29116	7.21405	7.63267	6.84219	7.38587	8.8383	8.91066	8.76821	8.58839	8.74327	8.71751	8.37085	8.50461	7.5444	4.00157	8.35124	8.37122
COBS01043	10.1824	10.8147	11.5948	9.64673	9.02998	8.77293	10.2778	10.274	10.196	9.83328	9.96502	11.299	11.5065	12.1238	11.439	10.6751	10.5435	10.6165	11.5388	11.6353	10.5176	10.545	10.2795	12.1961
COBS01044	9.21217	8.397	8.79345	9.41385	7.49634	9.56112	9.15356	8.05627	7.59683	12.1469	12.1436	10.9124	9.37564	7.56747	7.85515	9.47953	5.90238	8.13052	11.9377	8.38077	8.95254	10.7125	12.0043	10.8811
COBS01045	4.00157	5.76851	5.49449	7.08569	4.81061	4.58417	5.16141	4.49951	5.34422	5.6015	6.38488	5.56859	5.84507	5.41553	5.90435	5.71737	5.4329	7.37947	5.17993	4.83471	4.51701	4.00157	6.66693	5.8943
COBS01046	8.98329	9.56123	9.51929	9.54582	8.818	10.0913	9.73747	8.87031	9.26942	8.7558	8.96198	8.82782	9.798	9.68334	9.67911	9.78177	9.78822	9.83937	9.70309	9.64066	9.21604	9.36357	8.79089	9.63722
COBS01047	10.4357	11.585	11.865	7.94135	7.61608	9.23304	8.95335	9.51038	8.85037	8.90981	9.04725	10.1959	10.7422	11.9851	12.062	8.18948	8.32361	8.20891	9.3504	9.37163	9.57985	8.641	9.546	10.5115
COBS01048	6.65953	7.24353	6.08619	8.31386	7.98503	7.03982	8.77127	7.18888	7.83871	6.36801	6.67712	7.50672	8.23785	6.14594	6.25427	8.45262	7.26515	7.24541	9.67255	8.14049	7.21032	9.95203	6.10634	7.23499
COBS01049	8.72156	9.24557	8.98157	9.81036	8.97168	8.68272	9.8781	9.1158	9.42282	7.13857	7.6702	8.90898	9.29888	9.04092	9.18877	9.88467	9.96454	9.79413	10.2847	10.2232	9.15716	7.89163	8.4366	9.60363
COBS01050	4.62807	5.38358	4.83614	5.29445	5.66578	4.47832	5.08996	5.61342	5.84223	5.11707	4.87603	4.89485	5.96153	5.21973	5.53805	5.28685	5.51272	5.66905	5.55836	5.40836	6.1451	4.00157	5.69154	5.82871
COBS01051	14.5568	13.5889	12.273	10.5419	10.2865	11.7957	11.3106	11.2174	10.6245	11.4246	11.8013	11.3176	13.677	14.2635	14.0844	11.4633	11.2679	11.9566	11.3193	11.3054	11.434	11.9547	11.8572	11.8363
COBS01052	9.38334	10.2242	9.79295	10.4242	9.79776	9.90194	10.1536	10.0352	10.3475	9.77369	9.81272	10.0727	9.83155	9.69657	10.0059	10.5007	10.5918	10.3624	10.7979	10.9077	10.0039	9.34362	10.0758	10.3331
COBS01053	4.36517	6.15961	5.60956	5.91746	5.41113	4.00157	5.92042	4.85579	4.37248	4.00157	4.87603	5.24618	4.87008	5.28919	5.64962	5.97812	6.18733	6.67473	6.22504	5.84239	5.1835	4.44244	5.6087	6.20455
COBS01054	10.8711	10.8716	10.8128	11.1327	11.3971	11.3007	11.0041	11.4298	11.4863	10.9209	10.7419	11.351	10.9041	10.9475	10.8522	11.2533	11.3309	11.0712	11.4032	11.4093	11.3191	10.0761	10.5935	10.6468
COBS01055	9.21962	8.65838	8.92374	8.14847	8.48838	8.95862	8.57833	8.53716	8.57188	8.7614	8.97944	8.67295	9.38213	9.09391	9.03252	8.65277	8.33801	8.58253	8.88866	8.13242	8.75253	4.75941	8.81185	8.27755
COBS01056	7.98281	9.50158	8.70845	10.5998	10.0979	9.10467	10.7011	9.89915	10.2284	8.54489	8.96198	9.36666	8.18678	8.46084	8.83985	9.86991	10.0361	9.87652	10.251	10.5384	10.0482	9.37673	9.07841	10.0879
COBS01058	10.0013	10.9272	10.0167	10.383	10.2318	9.05282	11.078	11.2348	11.4858	11.0702	11.0263	11.1643	10.3361	9.81776	10.3925	10.7961	10.837	10.7236	11.5218	11.6829	11.4063	11.3185	11.6404	11.5265
COBS01059	9.71555	10.1398	10.5875	9.15348	8.51314	8.04958	10.6407	10.5502	10.3153	9.83593	9.75309	10.1757	10.7334	11.1311	9.557	9.75462	10.0894	9.84321	10.9915	10.9224	10.4878	8.77133	10.6337	10.9809
COBS01060	11.333	11.268	12.0786	10.6508	9.96238	10.898	10.909	11.0287	10.9782	11.3506	11.2185	11.1186	11.647	12.0443	11.6567	10.6294	10.6385	10.8001	10.9965	10.8804	10.9532	10.7597	11.6969	11.3211
COBS01061	7.16773	8.3526	7.90928	9.39739	8.69722	7.96001	8.169	8.11782	7.80459	7.90041	7.7744	7.69624	8.57488	8.06237	7.9685	9.03877	9.01799	8.88327	8.60612	8.64151	7.56833	8.46721	9.03865	8.39502
COBS01063	12.1753	12.0682	11.6473	12.4705	13.0269	12.6807	12.5348	12.5568	12.7496	12.5315	12.5218	12.4486	11.5503	11.4737	11.6357	11.9498	11.9743	11.9198	11.7488	11.885	12.5564	13.2	12.1829	11.8552
COBS01064	4.62807	5.28755	5.41066	5.25583	5.41113	4.00157	5.16141	5.40459	5.61979	4.00157	4.87603	5.36471	5.40739	5.47355	5.32321	5.20849	5.34678	5.24602	4.95071	5.31083	4.00157	4.00157	4.96043	5.22446
COBS01065	10.096	10.1499	9.6137	10.6376	10.4901	10.0796	10.7011	10.2673	10.3008	9.31911	9.72749	10.3197	10.0159	10.0865	10.0352	9.98554	9.94824	10.1621	9.73474	9.91497	10.2757	10.7834	9.73481	10.2149
COBS01066	5.48241	6.51615	6.35416	6.88715	6.67109	6.00509	8.03224	7.72775	7.41832	5.70832	6.76212	6.72356	5.51999	6.2992	6.51246	6.50573	6.652	6.46127	7.12983	7.4309	7.73251	4.00157	6.10634	7.29861
COBS01067	4.94899	5.38358	5.36619	6.34505	5.45123	4.00157	5.77203	5.04052	5.38807	4.91966	4.00157	5.36471	5.05767	5.06398	5.32321	5.12336	5.53182	5.45011	5.55836	5.73045	5.32561	8.18955	5.45586	5.84544
COBS01068	4.36517	4.54097	4.37895	5.29445	5.23364	4.00157	5.01248	5.04052	5.14736	6.06104	4.87603	5.24618	4.44071	4.7611	4.7521	4.60343	4.58682	4.43587	4.88249	4.70844	4.00157	4.00157	4.77775	5.10156
COBS01070	9.67279	9.94468	9.52578	10.7434	11.0553	10.3745	11.0578	10.2133	10.9474	9.29619	9.90236	9.88915	9.10469	9.31939	9.74584	9.71437	10.107	9.6173	10.5066	10.8309	10.3008	9.7369	8.28871	9.65482
COBS01071	4.80628	4.84726	4.53377	5.17383	5.23364	4.00157	4.00157	5.09424	4.52469	4.00157	5.22066	4.75988	4.87008	4.44343	4.53523	4.65994	4.37323	4.78773	5.17993	5.27619	4.00157	4.00157	4.81141	4.99739
COBS01072	7.1573	6.79807	5.92811	7.88453	9.15048	8.76122	8.60898	8.70003	9.68979	7.04878	6.5865	8.35087	5.88511	5.89544	6.45712	7.24216	7.74973	7.04959	8.09478	8.19962	8.83655	9.09171	6.14402	7.2051
COBS01073	8.4904	9.26164	9.77672	8.75725	8.29246	8.27661	8.98483	8.84026	8.72514	8.34315	8.74426	9.13979	9.90317	10.0312	9.63553	9.31364	9.19564	9.37176	9.2148	9.34923	8.62977	4.00157	9.17216	9.29811
COBS01074	9.30847	8.67048	8.80417	7.89503	8.17313	8.88234	8.43743	8.51067	8.92186	9.14187	9.0306	8.79285	8.92973	8.71111	8.63357	8.09383	8.11351	8.25582	8.09478	8.12023	8.4059	10.0165	8.86766	8.56084
COBS01075	7.49135	7.53783	7.98056	7.86863	7.92465	7.67074	7.06479	7.06812	7.11656	7.3026	6.63256	7.18273	7.39319	7.81203	7.76197	7.80228	7.71693	7.83204	7.11907	6.90837	7.1046	8.60229	8.08291	7.54694
COBS01076	7.2485	7.95695	7.66336	7.54055	7.07226	7.54596	6.83845	7.32659	7.34394	7.46345	7.15456	7.24506	7.95337	7.81203	7.79129	7.59286	7.77472	7.84131	7.6224	7.39063	7.50359	5.41255	7.73491	7.65652
COBS01077	9.75538	4.84726	4.9838	9.42111	7.22148	6.98982	12.4035	4.70236	4.00157	8.0454	9.24789	4.59162	12.584	4.44343	4.53523	10.7003	7.02241	6.45299	13.4638	4.89054	4.00157	10.742	4.66564	4.68519
COBS01078	10.9671	11.5598	11.7739	12.1943	11.9534	11.7506	10.7011	10.1289	10.5027	9.84385	9.98676	10.2708	10.7905	11.3096	11.8288	11.7103	11.4684	11.7472	10.7375	10.5384	10.2181	10.3355	9.94473	10.2936
COBS01079	4.00157	4.66032	4.65157	5.21568	4.95404	4.00157	4.00157	8.11782	4.37248	12.4016	13.5488	4.95444	4.00157	4.44343	4.37999	4.60343	4.26473	4.50244	4.51538	6.21093	8.57991	9.34362	4.77775	11.2205
COBS01080	4.94899	4.38409	4.00157	4.74063	5.87496	6.69624	5.84845	6.95887	4.64053	4.46639	5.0648	5.50469	4.00157	4.00157	4.00157	4.38387	4.00157	4.00157	4.80775	4.32021	5.1835	7.23774	4.57792	4.73885
COBS01083	9.28262	9.4036	9.17295	9.59475	9.40289	9.31534	8.77578	8.93714	8.92502	9.96261	9.66415	9.32242	8.72543	8.66873	9.22666	9.35039	9.32878	9.42187	9.09523	8.66125	8.76631	4.75941	10.2212	9.1708
COBS01084	9.66917	9.78154	9.34676	9.4193	9.86011	9.9244	9.74437	9.76973	9.74275	9.2807	9.37204	9.63346	9.37564	9.78841	9.99031	9.37888	9.61314	9.67868	9.29721	9.31941	9.55032	8.61901	9.07378	9.28827
COBS01085	8.21977	9.56986	9.7658	8.83269	7.53738	7.5664	8.96524	8.82193	8.66199	8.07272	8.47533	8.55959	9.63925	9.78345	9.88767	9.74038	9.60623	9.72681	10.0877	9.67846	9.04301	4.44244	9.84121	9.7804
COBS01087	8.65346	8.76755	9.70801	8.44799	7.87444	7.86447	7.74923	8.44424	8.40486	8.60837	9.62032	8.99864	9.36258	9.62918	9.33964	9.22226	8.84918	9.2717	9.08708	8.98128	8.11382	5.35138	8.70829	9.91886
COBS01088	4.00157	5.28755	5.41066	6.39182	6.4069	6.41819	6.2017	6.80271	6.41707	6.8498	7.73363	6.14945	5.71645	4.7611	5.32321	6.48706	6.44879	6.40221	6.32492	6.17847	6.69987	5.35138	5.84178	6.07273
COBS01089	8.56256	8.29639	9.17571	8.37876	8.29246	9.01883	8.48778	8.79711	8.84703	8.28989	8.20497	8.9279	8.94734	9.0492	9.04469	8.9391	8.97416	9.09119	9.14058	8.80756	8.91594	9.94322	8.52227	8.80726
COBS01090	8.97744	9.32675	9.91989	8.65008	8.13104	8.33707	7.77658	7.67399	6.99965	8.21021	8.734	8.24691	10.0811	9.6913	9.66341	8.92236	8.65023	8.9517	8.25897	8.43422	7.74653	8.57969	9.15913	8.74488
COBS01091	7.40618	7.11815	7.59048	7.14902	7.58512	7.16203	7.32313	6.92436	6.76083	6.80635	7.02425	7.15515	8.0708	7.85059	7.45758	7.36729	7.19236	7.62546	6.8717	6.81924	7.25049	4.00157	6.79872	6.52598
COBS01092	7.43227	6.81298	7.21185	9.14911	11.601	10.4263	6.82078	6.64104	6.60786	5.85257	5.68094	5.96192	6.19785	6.69716	7.2716	10.631	8.81359	9.7515	7.50412	7.96065	6.12271	4.00157	5.42262	5.87822
COBS01093	10.3467	10.6566	10.6151	10.8713	11.1083	10.6599	10.1793	10.1051	10.2738	10.436	10.243	10.361	10.6778	10.6363	10.784	10.8422	10.752	10.9298	10.1346	10.0976	10.5033	8.68929	10.3181	9.9628
COBS01094	6.35922	5.66582	6.03564	5.89521	5.56353	4.33945	5.73194	5.67536	6.74628	5.94014	5.47464	6.26093	6.10181	5.21973	5.53805	5.92151	5.41201	5.7434	5.75419	5.65793	5.07583	4.00157	5.53486	4.99739
COBS01095	9.77236	9.33942	10.3859	8.60615	8.33939	7.50417	9.02323	9.62402	10.0384	9.42152	8.60486	9.92723	10.3609	10.4269	9.78987	9.11882	9.06774	8.89958	9.719	9.85633	9.41705	5.14257	9.24793	9.86978
COBS01096	6.95494	7.85429	8.77539	7.94135	7.12739	7.54596	7.22007	7.49155	7.32472	7.56994	7.1231	8.74791	9.0487	9.23846	8.27856	8.67893	8.39193	8.76846	8.97075	9.10782	7.73954	4.00157	7.77835	9.76529
COBS01097	10.8552	10.6847	10.7384	5.17383	4.00157	5.27175	6.40926	6.97019	6.97505	9.00716	9.22611	5.40143	7.00843	12.4165	10.1253	5.02971	4.45613	4.70643	6.38144	5.4688	7.05998	5.41255	9.45392	7.4487
COBS01098	10.3433	11.3491	11.249	11.153	9.98464	10.0511	11.0943	9.7521	9.94488	9.84648	10.7995	10.0531	10.5222	11.0396	10.8813	10.5445	10.4178	10.0128	10.7479	11.0123	10.2017	9.72923	10.8951	11.0276
COBS01099	4.36517	6.60525	6.27074	7.15784	6.0775	4.00157	6.9881	5.32512	5.78275	4.79992	6.43818	4.34381	6.45002	6.60806	6.33914	5.95013	5.94336	5.95477	6.18286	6.22686	5.7592	4.44244	6.31768	6.8258
COBS01101	5.97084	6.88524	6.70783	7.52707	7.13816	6.04668	8.10584	5.73421	6.27989	6.20639	7.02425	6.54834	6.57203	7.15271	7.15155	6.56911	6.44879	6.11443	6.43567	6.52374	6.40605	4.75941	6.57597	6.84156
COBS01102	5.01193	4.54097	4.37895	4.33497	5.01729	4.33945	5.45763	5.32512	4.52469	5.11707	4.87603	4.83041	4.75649	5.14504	4.65334	4.38387	4.00157	4.25294	4.80775	4.7744	4.88522	4.87342	4.57792	4.99739
COBS01103	6.04418	4.66032	4.53377	4.98486	5.59862	5.94003	8.1962	4.85579	5.2506	5.94014	6.48944	5.62912	5.13829	5.06398	4.00157	5.02971	4.86276	4.89473	4.62923	4.89054	5.59799	4.00157	4.77775	4.4872
COBS01105	11.645	10.3194	10.8683	9.70287	10.1631	10.717	10.398	10.82	10.1602	10.6302	10.7264	10.2376	11.1669	11.0334	10.5046	10.664	10.5122	10.402	10.7033	10.6031	10.83	11.3761	10.5254	10.4199
COBS01106	5.27434	4.54097	4.75006	4.98486	5.01729	4.33945	4.83244	4.60994	4.96746	4.00157	4.62456	5.01005	5.13829	4.87534	4.53523	4.84678	4.96936	4.92735	4.51538	4.83471	5.07583	4.00157	4.66564	4.68519
COBS01107	10.8099	10.2215	10.4724	10.0279	10.2649	11.1791	9.74667	10.1151	10.2335	11.0702	10.7342	10.4374	10.4714	10.3043	10.3721	9.98393	9.84551	9.87203	9.6432	9.48502	10.1928	11.537	10.6709	9.83643
COBS01108	7.19856	5.18159	8.04846	6.45174	5.59862	4.33945	4.42128	4.60994	4.00157	8.70445	8.63824	5.65824	5.76085	5.63152	4.8384	4.92491	4.82376	5.8925	4.80775	6.17847	5.01687	4.44244	10.2347	8.3443
COBS01109	6.2823	6.22989	6.03564	9.09342	7.80239	10.0022	8.65864	8.38296	7.51462	8.64516	7.96243	8.13482	5.84507	6.04452	5.84548	7.44967	7.54057	8.83783	6.69311	7.23993	8.35661	8.28354	8.18306	7.7705
COBS01110	4.00157	4.84726	4.00157	4.47203	4.72705	4.33945	5.88495	5.51384	5.61979	4.00157	5.68094	5.53709	4.62026	4.62407	4.65334	4.65994	4.93536	4.78773	5.22942	5.43899	5.28042	4.62267	5.29745	5.06816
COBS01111	5.86591	5.33666	5.27122	5.25583	5.28094	4.00157	6.6507	5.94473	5.4302	5.65612	5.68094	5.65824	5.05767	4.97491	5.32321	5.64695	5.64015	5.77189	6.04748	6.2426	5.90141	4.00157	6.05764	5.95661
COBS01112	5.62457	6.4404	5.31979	5.82595	4.63148	4.00157	5.08996	5.36559	4.00157	4.79992	4.00157	4.34381	6.22835	5.63152	6.11573	4.71169	4.78259	5.12628	4.36585	4.63505	4.72674	4.00157	5.94351	5.74147
COBS01113	5.65754	5.89318	5.77925	5.89521	5.41113	4.00157	5.95491	5.40459	4.00157	5.02391	5.35526	5.24618	5.40739	5.72605	5.61361	5.75108	5.81613	6.04842	6.30554	6.31862	6.54451	4.44244	5.19778	5.72324
COBS01114	4.36517	6.22989	5.45337	5.6744	5.36949	4.00157	5.01248	5.36559	4.00157	5.85257	4.00157	5.32668	5.76085	5.41553	5.78365	5.09319	5.30095	5.24602	5.07255	5.16451	5.45065	7.40262	6.00703	5.70473
COBS01115	8.57036	8.65432	9.15072	8.33326	8.04863	8.18743	8.02467	7.68762	7.33436	8.37272	8.58216	7.62477	8.94296	9.28476	8.88457	8.2145	8.06522	8.32122	7.9093	7.74433	7.92355	5.06167	8.58699	8.11174
COBS01116	10.1875	10.366	10.2989	10.5302	10.4319	11.2997	10.0328	10.5455	10.57	10.7877	10.4882	10.47	10.1242	10.0144	10.4091	10.2219	10.2456	10.2305	10.0616	10.1262	10.5528	10.809	10.61	10.0452
COBS01118	5.65754	6.25251	6.27074	6.45174	5.52733	6.18252	6.5021	6.35576	4.89811	6.17154	5.47464	6.91251	6.31585	6.63088	6.13986	6.28461	6.69078	6.54916	6.88453	6.81924	6.07673	4.00157	6.09675	6.9759
COBS01119	7.42363	6.88524	7.70229	6.69279	6.81357	6.78159	8.40868	8.27912	8.33983	8.28212	7.02425	9.398	7.45652	7.68967	7.38223	7.25303	7.43224	6.98903	7.87802	8.01877	8.23291	6.77595	7.7052	9.41507
COBS01120	13.3514	12.3736	11.8383	9.91681	9.08875	10.6638	10.7477	10.7304	10.6196	10.2695	10.2502	10.8451	12.7136	13.0803	13.0115	9.96282	9.97837	10.0949	10.6582	11.0351	10.8496	10.8509	10.6601	11.0565
COBS01121	8.86155	9.8837	8.80773	9.07283	8.68275	9.03106	8.76222	8.63498	8.91232	8.07272	8.34651	8.56306	9.52962	9.02841	9.39059	8.96712	9.44514	9.00063	8.79161	8.88391	8.56027	7.76673	8.49658	8.74488
COBS01122	11.4594	11.2215	10.731	11.4651	11.9916	11.7539	11.3428	11.7373	12.0437	11.6944	11.4284	11.7104	10.8734	10.9792	11.0171	11.2178	11.2871	11.1023	11.4103	11.2968	11.7389	12.2111	11.3462	10.9442
COBS01123	4.00157	4.76009	4.65157	4.66402	4.63148	4.00157	5.29025	4.35454	5.29847	4.00157	4.62456	4.68136	4.75649	4.7611	4.53523	4.27229	4.00157	4.43587	4.36585	4.45129	4.51701	4.00157	4.66564	4.83505
COBS01124	9.2221	9.35698	9.81254	9.30629	9.33286	9.46345	8.73006	8.97081	9.04338	9.59744	9.24789	8.74181	9.92109	9.60973	9.67324	9.71729	9.5528	9.65793	8.98252	8.90534	8.73162	8.60229	9.44232	8.74488
COBS01125	8.70749	8.50912	8.86007	7.67487	8.03156	8.54267	8.31879	8.0976	7.9174	8.49873	8.41236	8.1671	8.95171	9.21658	8.68506	8.34605	8.25441	8.62419	7.85891	7.97427	7.92355	4.00157	8.37588	8.16198
COBS01126	10.4325	10.3397	10.4757	9.65906	9.65512	10.2451	9.67376	10.1632	10.3928	9.87769	9.94295	10.3788	10.6214	10.943	10.5891	10.2617	10.1726	10.4277	10.4653	10.3818	10.1129	9.63387	10.0513	10.3412
COBS01127	7.61781	8.02151	8.81128	7.63149	6.47792	7.29099	9.06799	9.30363	8.8833	9.16736	9.0306	8.66974	7.64206	8.61951	8.52904	7.66344	7.60182	7.88382	8.76117	9.10165	8.99703	9.30973	9.94157	9.69685
COBS01128	8.42738	9.16239	9.13665	11.1885	10.9559	10.0784	10.4298	9.4619	9.73195	8.24261	9.05551	8.98063	8.38746	9.13338	9.3738	10.3643	10.5011	10.5458	9.92811	10.3015	9.35463	10.207	8.08751	9.21152
COBS01129	7.52403	7.53783	8.00562	7.3468	6.94275	8.25587	7.4872	7.38654	7.85879	7.63267	7.9447	7.77634	8.20889	8.33765	7.90962	7.88787	7.75332	7.96522	7.66709	7.56346	7.85406	7.60756	7.93999	8.06958
COBS01130	9.81559	10.5786	10.6302	10.4232	10.0621	9.51486	9.48317	9.31459	9.36341	9.17994	9.6424	9.3427	10.0488	10.4284	10.533	10.3858	10.3772	10.4359	10.085	10.1212	9.33629	9.81385	10.0114	9.96456
COBS01131	7.8733	8.18818	8.28163	8.86233	9.11052	8.0399	8.7981	8.45619	8.85037	7.49083	7.99724	8.37868	7.63114	7.68967	8.0854	8.50082	8.62307	8.43558	8.34369	8.5416	8.56027	9.04302	8.01202	8.13394
COBS01132	4.00157	5.55334	4.00157	4.66402	4.36716	4.00157	4.00157	4.85579	5.34422	4.00157	4.87603	4.48445	4.62026	4.44343	4.00157	4.46911	4.58682	4.35662	5.01375	4.83471	4.00157	4.00157	4.66564	4.68519
COBS01133	5.22726	6.89925	5.68037	7.65644	6.79996	6.81662	6.63044	6.06033	6.34042	4.65614	6.48944	6.12991	5.96153	6.00886	6.06607	6.27364	6.4211	6.21749	6.13929	6.92743	6.29195	4.00157	6.38124	6.80182
COBS01134	5.31935	6.38065	5.57248	8.08576	7.11653	4.00157	8.01706	5.61342	6.36	6.24033	6.63256	6.02752	6.25817	5.85523	5.84548	6.08429	5.96996	5.8667	6.13929	6.82943	6.27195	4.00157	6.30952	6.90287
COBS01135	5.5557	6.4788	5.77925	7.65644	8.04296	5.55026	7.23337	6.56762	7.20354	6.022	6.32938	6.83299	5.67034	6.04452	6.23217	6.07149	6.14208	5.94256	6.47065	6.71297	6.99027	4.00157	6.31768	6.3804
COBS01137	5.40395	5.70104	5.16646	6.64278	5.75988	4.33945	6.54624	4.92207	4.64053	4.65614	4.00157	4.00157	5.05767	5.47355	5.22342	5.55251	5.34678	4.95872	5.27658	5.24034	5.52672	4.00157	5.33475	5.81175
COBS01138	7.81523	4.38409	4.00157	4.66402	4.51723	4.00157	10.0736	4.00157	4.37248	6.91253	7.24493	4.00157	5.46512	4.44343	4.00157	4.71169	4.26473	4.00157	5.44638	4.00157	4.51701	9.99743	4.23816	4.95972
COBS01139	6.09085	6.4788	5.89973	7.64402	7.34719	7.43166	6.89014	6.61214	6.88536	5.02391	6.27146	6.47446	5.88511	6.26994	5.90435	6.17052	6.04657	6.21749	6.39976	6.65659	6.25164	8.04005	6.25947	6.55524
COBS01143	4.00157	4.54097	4.00157	4.33497	5.36949	4.00157	4.92743	4.35454	4.00157	4.65614	4.00157	4.00157	4.00157	4.00157	4.53523	4.27229	4.58682	4.35662	4.88249	4.45129	4.00157	4.00157	4.41045	4.56146
COBS01144	9.29912	10.1953	9.21373	12.1238	13.4009	11.1093	11.7521	10.7818	11.0076	9.75701	10.2574	10.6237	9.38213	9.44702	9.51825	12.0726	12.0487	12.027	11.2746	11.5059	11.1212	9.9695	9.75009	10.4785
COBS01145	5.51965	6.84234	6.03564	7.84173	7.93693	6.04668	8.08416	6.52159	7.16072	6.42755	7.53419	6.61841	6.19785	5.41553	6.25427	6.0323	6.3542	5.94256	6.18286	6.74571	6.47705	4.62267	6.42701	6.5933
COBS01146	6.51767	8.01519	7.40433	9.53916	9.21973	6.4487	8.45441	7.72114	8.33983	7.92061	8.19002	7.72759	7.70584	7.44646	7.37252	7.43072	7.68336	7.42561	7.71752	8.12431	8.09753	4.00157	7.88017	8.33885
COBS01147	8.63871	9.61016	9.20566	10.6283	10.7906	9.54245	9.93959	10.0286	10.0688	9.28847	9.42396	9.76245	9.29545	9.24208	9.30211	9.61585	9.70009	9.57364	9.82571	9.98814	9.88437	9.21036	9.47422	9.65264
COBS01148	9.97367	10.5186	10.5143	10.0596	9.95638	9.49557	9.70714	9.57745	9.72652	10.6958	10.6898	9.89739	10.5698	10.1666	10.3503	10.513	10.2968	10.4545	10.0686	9.92665	9.42792	10.3202	11.1841	10.4963
COBS01149	8.06254	9.62266	9.98255	9.74827	8.14168	8.49396	8.31879	8.0191	8.68833	8.03618	8.39943	7.92959	9.76613	9.8607	9.92928	9.84439	9.88439	9.98879	9.44273	9.38694	7.978	9.44075	9.40695	9.49054
COBS01150	12.3041	11.8936	12.7933	11.6236	11.0817	10.8907	11.1113	11.2908	11.4127	11.3672	11.3434	11.2585	12.5405	13.0208	12.5101	12.175	12.0353	12.2608	11.9298	11.7243	11.5775	9.90743	11.8824	11.668
COBS01151	10.5631	9.91451	10.2747	9.95104	10.0965	10.441	9.86971	9.93653	10.1083	10.397	10.4067	9.97606	10.061	10.1124	10.0059	10.106	10.1147	10.0244	9.8516	9.79648	9.7932	11.4036	10.6442	9.95926
COBS01152	9.67279	9.11599	9.26894	9.23397	10.1369	10.931	9.5995	9.77609	9.79384	9.81995	10.1765	9.63674	9.46389	9.45015	9.3882	9.55745	9.78035	9.90028	9.19471	9.13226	9.70305	8.90906	9.2252	8.83457
COBS01153	6.43195	6.81298	5.89973	6.72913	6.78622	6.81662	7.62423	7.32659	7.62843	8.51207	7.69166	7.77034	6.31585	6.00886	5.96058	8.37837	7.70954	7.84439	8.45363	8.84254	7.42706	4.87342	7.3565	7.89476
COBS01154	9.62871	9.0982	9.27409	8.79686	8.91092	8.79031	9.06063	9.37659	9.22388	8.73889	8.01434	9.22965	9.57843	9.40249	9.36169	9.41401	9.31189	9.16784	9.35945	9.14632	9.19328	4.00157	8.85828	8.77137
COBS01155	8.76297	8.67048	9.1253	10.5151	10.2055	10.1541	9.82913	9.23603	9.47342	9.42152	9.37863	9.04394	8.4257	9.0899	9.32225	11.3321	10.5803	11.0784	10.2153	10.3613	8.61842	7.64085	9.97476	9.32447
COBS01156	5.31935	5.18159	4.83614	5.72706	5.32615	4.47832	5.16141	5.32512	6.14982	5.6015	4.87603	5.32668	5.05767	4.62407	4.98643	5.51245	5.34678	5.69934	4.95071	5.03811	4.81027	4.00157	5.06291	4.83505
COBS01157	5.17783	5.73525	6.22698	6.68045	6.1007	6.4487	5.01248	5.36559	5.03153	4.00157	4.62456	5.53709	4.96909	4.97491	5.93278	7.04342	6.74329	7.29153	6.07105	5.88446	4.81027	4.00157	5.55001	5.79456
COBS01158	7.94121	7.48366	7.75507	6.56416	6.78622	7.01004	9.54251	10.5011	9.73736	10.2217	10.3609	9.89465	8.36795	8.3444	8.25251	6.2058	6.36396	6.40221	8.54387	8.98352	10.1554	4.00157	9.05515	9.78341
COBS01159	8.13806	7.28649	7.52241	7.62519	8.11493	6.35501	11.3706	12.2253	11.4484	10.3533	9.98676	11.4714	7.85383	7.31415	7.14011	7.39692	7.70583	7.34057	10.2631	10.4562	12.0819	10.3605	10.2765	11.1029
COBS01160	11.2181	11.2647	11.0593	10.6539	10.223	10.1156	11.162	11.2192	11.3751	10.4585	10.797	11.1847	11.5936	11.0684	11.2358	10.5208	10.9648	10.2404	11.2752	11.5355	10.8325	10.9652	11.4386	11.693
COBS01161	10.3284	10.5219	11.6497	9.8712	8.85072	9.55605	9.33846	9.64848	9.40026	10.3309	10.2681	9.59172	10.9441	11.3883	11.2542	9.63753	9.50263	10.1261	9.49501	9.33352	9.443	9.87767	10.6891	10.1458
COBS01162	5.99576	6.00651	5.89973	5.46877	5.23364	6.08697	7.06479	8.5409	8.40486	8.08171	7.85261	8.48483	5.28168	6.00886	6.20969	5.78388	5.94336	5.9907	7.22311	7.10492	8.83982	10.6758	7.76977	8.37388
COBS01163	10.8255	11.2146	11.0815	12.0781	11.7366	10.8588	12.2842	11.4248	11.9756	11.3617	11.7753	11.6082	11.1679	11.1968	10.8711	11.7556	11.5315	11.4657	11.9464	12.2207	11.878	11.9492	11.7222	11.8616
COBS01165	4.00157	4.76009	4.00157	4.66402	5.18399	5.74787	5.73194	4.00157	4.00157	4.00157	4.00157	4.34381	4.44071	4.00157	4.37999	4.00157	4.26473	4.00157	4.62923	4.45129	4.88522	4.00157	4.74242	4.87883
COBS01166	4.00157	4.54097	4.00157	5.13009	4.95404	4.00157	5.08996	4.00157	4.37248	4.00157	5.0648	5.24618	4.00157	4.44343	4.00157	4.54066	4.26473	4.43587	4.72447	4.55127	5.1835	4.00157	4.90414	4.78856
COBS01167	4.00157	5.51326	5.04887	6.70501	5.92872	4.00157	6.33517	5.47861	5.87093	4.00157	5.77192	4.89485	5.28168	5.47355	4.65334	4.96131	5.30095	4.98896	5.22942	5.65793	5.97953	4.00157	5.93261	6.32433
COBS01169	4.00157	5.92249	5.27122	6.88715	6.52884	4.00157	6.38502	6.08225	6.45382	5.42	6.2109	5.96192	5.67034	5.35425	5.05165	5.42776	5.17648	5.29015	6.04748	6.03989	6.40605	8.85365	6.04768	6.60265
COBS01170	5.22726	6.45974	6.08619	8.21693	7.89348	4.00157	7.94666	6.90086	7.42735	7.01119	6.84219	7.06901	6.25817	6.07922	6.13986	5.97812	6.27339	5.94256	6.94696	7.04532	7.56039	7.53855	7.14137	7.76643
COBS01172	4.51443	6.96726	6.55993	8.21693	8.10953	4.00157	8.10584	7.55251	7.23483	6.7841	8.09687	7.34589	6.64032	6.2992	6.35954	6.24015	6.1984	6.10366	6.38144	7.11323	7.48694	8.85835	7.24475	7.72096
COBS01173	4.62807	6.6889	6.06116	7.95647	6.64073	4.00157	6.45648	5.09424	6.5751	4.65614	6.53884	6.31332	5.99807	5.67973	5.84548	5.62866	5.94336	6.10366	6.4878	6.64503	6.02905	4.00157	6.79872	7.28154
COBS01174	9.65825	8.49103	9.67531	8.52756	8.97168	9.13218	10.4789	10.3194	10.4121	9.54332	9.90236	11.2591	9.78582	10.2747	9.33221	9.09063	9.05619	9.22189	9.75202	10.0331	10.1436	10.4141	8.71127	11.0381
COBS01175	5.36249	6.15961	5.45337	7.62519	7.88082	6.65797	7.46489	7.02543	7.53979	5.11707	5.93575	5.91622	5.51999	5.28919	6.23217	7.27982	7.73888	7.29153	7.48758	7.54526	7.1046	4.00157	5.63697	6.49608
COBS01176	4.00157	5.42853	4.83614	5.13009	5.45123	4.00157	6.67067	5.9687	6.17241	6.27342	7.09092	6.53388	5.46512	4.87534	4.37999	4.60343	4.45613	4.61349	5.12777	5.58066	6.8261	4.00157	5.86512	5.74147
COBS01177	6.26236	7.22154	7.74019	6.62998	4.72705	6.32226	7.44223	7.30899	7.41832	6.39811	6.53884	7.38587	7.84442	8.5097	7.8482	6.08429	6.04657	6.38485	7.7866	7.88572	7.73954	4.00157	7.21112	8.23419
COBS01178	7.45789	7.83285	7.93561	7.61249	5.72933	7.02996	7.72134	7.61097	5.72021	7.9699	7.85261	6.92351	8.28717	8.61951	8.32928	6.8769	7.672	7.91635	7.63745	7.67916	8.30557	4.00157	8.60633	8.57941
COBS01179	10.0185	9.74391	9.97941	9.39002	8.98942	9.82399	8.55753	8.92287	8.85702	9.47692	9.32502	8.8898	9.88274	9.74322	9.76802	9.01054	9.09057	9.48706	8.56361	8.38077	8.89101	9.5666	9.41702	9.17691
COBS01180	10.0605	10.7573	10.4532	10.2579	9.77239	10.1519	8.53643	8.64196	8.6196	11.0836	10.6192	9.7088	10.4577	9.93625	10.2289	9.52568	9.20482	9.51906	8.4019	8.0704	8.94651	11.1324	10.8984	9.63722
COBS01181	9.88279	10.1841	10.3338	10.1551	9.81278	9.44529	9.46655	9.44803	9.62511	9.63446	9.52845	9.5347	10.2677	10.3569	10.3318	10.2828	10.1899	10.2543	9.95224	9.79265	9.80325	10.0558	10.412	9.94681
COBS01182	8.8742	8.91719	8.78264	9.16865	9.23715	8.65134	8.57833	8.95688	9.12824	8.30531	7.9447	8.77205	9.18108	9.15271	8.99222	9.59277	9.66537	9.68639	9.20479	9.21082	8.86564	8.06472	8.72755	8.75103
COBS01183	14.1012	13.0934	12.7399	9.73378	10.0424	12.6921	10.6542	10.8436	10.7304	11.9488	11.7791	11.0745	13.4695	13.454	12.9384	11.0012	11.3351	11.5299	10.8897	10.4865	10.9166	12.786	10.9928	10.8098
COBS01184	10.3296	10.0127	10.6322	10.0219	9.37843	10.0772	9.01563	9.24523	8.91232	11.2449	11.0717	9.22091	9.96278	10.054	10.2915	9.97909	9.92542	10.2805	9.26866	9.27256	9.2726	10.9932	11.8579	10.453
COBS01185	9.99985	9.5677	9.66359	9.85389	10.2612	10.3964	10.1362	10.6154	10.595	10.0968	10.0376	10.4533	9.86202	9.77849	9.66538	10.026	9.89496	9.95162	10.1698	10.0026	10.5578	9.69552	10.0758	9.61266
COBS01187	8.61251	8.89674	9.31213	8.72827	7.75458	8.13387	8.46562	9.00642	8.71785	8.30531	8.45047	8.64053	9.16612	9.15271	8.84682	8.92573	9.09481	8.75386	9.53551	9.49917	9.04866	8.80093	9.19467	9.70003
COBS01188	7.46633	9.45109	10.2264	8.49006	6.5454	6.89506	6.70976	7.34398	6.87206	7.23926	6.98969	7.33776	10.2358	10.3719	10.3673	9.04651	8.98486	9.18366	9.182	8.91476	7.27015	4.00157	9.29731	9.23073
COBS01189	9.75708	10.7478	10.3894	10.8064	10.4639	9.32927	9.95951	9.75371	9.60355	9.74859	9.78817	9.91103	10.45	9.79334	10.2966	9.91796	10.5143	9.79413	9.99497	10.0277	9.64835	8.18955	10.4964	9.8013
COBS01190	6.68916	8.36755	6.55993	9.63586	9.72556	6.73347	10.5647	9.60629	9.46257	7.40705	8.46296	8.9279	7.24301	6.84044	6.98226	8.78092	9.34073	8.52821	10.18	10.3928	9.50178	9.11152	8.7451	9.74078
COBS01191	10.8157	10.6413	10.8649	10.6407	10.4932	11.4588	10.0827	10.2974	10.2297	11.29	10.3642	10.4477	10.5295	10.6941	10.6659	10.4549	10.5451	10.5701	10.0959	9.94285	10.3125	10.8367	10.7974	10.3412
COBS01192	10.2936	10.4984	10.5359	10.3708	10.1369	10.5324	10.1708	10.0166	10.2284	10.4184	10.0787	10.0107	10.6283	10.8033	10.5232	10.5402	10.7199	10.4926	10.3988	10.4873	10.2984	11.0186	10.6175	10.4448
COBS01193	11.2317	10.801	10.4095	10.0906	10.0537	11.3232	11.0146	10.9998	10.2103	11.5084	11.1982	10.4783	11.2321	11.0561	10.5341	10.9443	10.909	10.7165	11.3297	11.432	11.1199	10.5639	10.5883	11.1911
COBS01194	9.60995	9.98233	11.0608	9.29646	8.7709	7.43166	8.24259	8.59592	8.8898	8.58332	8.29156	8.36683	10.9957	11.4489	10.9573	9.8002	9.82865	9.97068	9.89114	9.70176	8.96454	8.98835	9.59113	9.52804
COBS01195	5.07063	4.38409	4.00157	4.00157	4.88559	4.33945	4.42128	5.44222	5.47076	6.09893	4.62456	5.86878	4.00157	4.44343	4.00157	4.27229	4.45613	4.25294	4.80775	4.32021	4.51701	4.00157	4.00157	4.39871
COBS01206	4.00157	4.00157	4.00157	4.00157	4.00157	4.00157	4.59308	5.04052	4.00157	5.27975	5.35526	4.89485	4.00157	4.00157	4.00157	4.00157	4.26473	4.00157	4.00157	4.63505	5.28042	4.00157	4.77775	4.62658
COBS01207	4.00157	4.00157	4.00157	4.00157	4.00157	4.00157	5.22791	5.44222	4.89811	4.00157	4.00157	4.59162	4.00157	4.00157	4.00157	4.00157	4.00157	4.00157	4.62923	4.70844	4.63121	4.00157	5.03839	4.99739
COBS01209	4.00157	5.42853	5.10952	4.47203	4.51723	4.00157	5.16141	11.5589	5.20034	16.2209	16.4629	4.34381	4.00157	4.62407	4.8384	4.00157	4.26473	4.00157	4.72447	9.00132	12.4778	14.1224	4.52828	13.4544
COBS01212	4.00157	4.00157	4.00157	4.00157	4.00157	4.00157	4.83244	5.04052	4.52469	5.3522	4.00157	4.34381	4.00157	4.00157	4.00157	4.00157	4.00157	4.35662	4.51538	4.55127	5.23313	4.00157	4.70516	4.56146
COBS01213	4.00157	10.9422	5.45337	4.00157	4.00157	4.00157	5.45763	5.51384	4.73743	5.89712	5.85654	5.11173	10.3821	9.72784	4.00157	4.38387	4.00157	4.00157	4.62923	4.70844	9.94462	10.5216	4.62342	6.22939
COBS01214	4.00157	4.54097	4.00157	4.00157	4.00157	4.33945	5.77203	6.42456	5.54771	6.13574	5.58241	5.20339	4.00157	4.00157	4.00157	4.00157	4.00157	4.00157	4.80775	4.7744	5.66513	4.00157	5.13275	5.43281
COBS01215	4.00157	4.00157	4.00157	4.57651	4.00157	4.00157	5.50816	5.09424	4.89811	4.00157	4.00157	4.95444	4.00157	4.00157	4.00157	4.00157	4.00157	4.00157	4.62923	4.99172	5.78899	4.44244	5.11005	5.4089
COBS01217	4.00157	4.00157	4.37895	4.33497	4.36716	4.00157	5.22791	4.85579	4.82212	4.00157	4.00157	5.24618	4.00157	4.00157	4.00157	4.00157	4.00157	4.00157	4.36585	4.32021	4.00157	4.00157	4.41045	4.39871
COBS01220	7.69866	7.06964	7.42315	6.55061	9.35126	7.86994	12.2093	8.06671	7.65935	7.95039	10.5004	7.49217	7.45652	7.81203	7.1964	5.68268	5.70717	6.70958	6.0942	6.00278	8.56422	9.98675	5.75642	6.75258
COBS01223	5.40395	4.99675	4.83614	8.63767	4.51723	7.36307	5.34902	4.00157	4.00157	4.00157	4.62456	4.00157	5.71645	5.67973	4.00157	4.54066	4.7389	5.01816	5.40639	5.84239	4.00157	4.00157	4.00157	4.4872
COBS01224	4.00157	4.76009	4.37895	5.21568	4.88559	4.33945	4.72355	4.98335	4.73743	5.11707	5.58241	5.50469	4.00157	4.44343	4.37999	5.23529	4.89988	5.35299	4.72447	4.63505	4.51701	4.00157	5.21852	5.03348
COBS01227	5.01193	4.00157	4.00157	4.57651	5.36949	4.00157	4.00157	5.19318	5.14736	5.27975	4.62456	5.40143	4.00157	4.00157	4.00157	4.27229	4.26473	4.25294	4.00157	4.00157	4.51701	4.00157	5.38833	4.87883
COBS01228	4.00157	4.38409	4.00157	4.33497	4.36716	4.00157	4.00157	4.00157	4.00157	5.48382	4.62456	4.75988	4.44071	4.00157	4.00157	4.00157	4.00157	4.25294	4.00157	4.00157	4.51701	4.00157	5.21852	4.95972
COBS01230	4.00157	4.00157	4.00157	4.33497	4.00157	4.00157	4.00157	4.35454	4.00157	5.48382	5.0648	4.34381	4.00157	4.00157	4.00157	4.00157	4.00157	4.25294	4.62923	4.00157	4.00157	6.96522	4.00157	4.39871
COBS01232	4.00157	4.99675	4.91335	4.98486	4.95404	4.00157	5.50816	5.84395	5.92641	4.00157	5.0648	4.75988	5.13829	5.72605	6.11573	4.84678	5.00205	5.07383	6.4878	6.02147	5.72866	4.00157	5.45586	5.95661
COBS01233	5.31935	6.05959	5.57248	5.36762	5.41113	4.00157	6.70976	7.40321	7.27549	6.71512	6.63256	7.05911	5.9239	6.2094	6.81879	5.81582	5.75507	5.7434	7.16161	6.73488	7.978	4.44244	6.28473	6.41295
COBS01235	4.00157	4.00157	4.00157	4.33497	4.00157	4.00157	4.00157	5.19318	4.00157	8.32813	8.88992	4.34381	4.00157	4.00157	4.00157	4.27229	4.00157	4.00157	4.00157	4.32021	4.367	8.52159	4.23816	4.73885
COBS01244	5.22726	4.00157	4.00157	4.00157	4.00157	4.33945	4.92743	4.35454	4.00157	4.46639	5.68094	4.00157	4.00157	4.00157	4.00157	4.27229	4.00157	4.00157	4.36585	4.32021	4.367	4.62267	4.23816	4.00157
COBS01245	4.36517	4.66032	4.00157	4.47203	4.00157	4.00157	5.84845	4.00157	5.2506	4.79992	6.32938	5.15866	4.00157	4.00157	4.00157	4.00157	4.00157	4.00157	5.17993	5.0822	4.72674	4.00157	5.03839	5.16497
COBS01253	4.00157	4.54097	4.37895	4.74063	4.63148	6.35501	4.83244	4.78321	4.73743	5.3522	5.68094	4.00157	4.44071	4.44343	4.7521	4.27229	4.52574	4.61349	4.80775	4.83471	4.95364	4.00157	4.77775	4.68519
COBS01259	4.51443	4.38409	4.65157	4.74063	4.72705	4.00157	4.00157	4.49951	4.00157	5.48382	6.08065	5.65824	4.87008	4.00157	4.8384	4.54066	4.78259	5.15144	4.00157	4.70844	4.367	4.00157	5.66457	5.4562
COBS01261	4.00157	4.00157	4.65157	4.93054	4.00157	4.00157	4.00157	4.35454	4.00157	5.27975	5.47464	5.56859	5.28168	4.62407	4.65334	4.92491	4.93536	5.17595	4.72447	5.03811	4.00157	4.00157	6.15327	4.95972
COBS01272	4.00157	4.00157	4.00157	4.00157	4.72705	4.00157	4.00157	5.09424	4.00157	7.17294	6.32938	4.00157	4.00157	4.00157	4.00157	4.00157	4.00157	4.00157	4.00157	4.00157	4.00157	4.00157	4.00157	4.39871
COBS01274	4.00157	4.66032	4.00157	4.33497	4.36716	4.00157	4.00157	4.00157	4.00157	4.91966	5.47464	4.00157	4.44071	4.44343	4.00157	4.27229	4.26473	4.35662	4.00157	4.55127	5.59799	4.00157	5.27829	4.92028
COBS01279	4.00157	12.2919	5.41066	4.47203	4.00157	4.00157	4.00157	4.35454	4.00157	4.00157	5.22066	4.00157	9.70279	8.00377	4.00157	4.00157	4.00157	4.00157	4.00157	5.03811	6.69987	4.62267	4.62342	6.63943
COBS01280	4.00157	4.66032	4.00157	4.00157	4.00157	4.00157	4.72355	4.35454	5.47076	4.00157	5.0648	4.00157	4.00157	4.00157	4.00157	4.27229	4.00157	4.00157	4.00157	4.00157	5.23313	4.00157	4.62342	4.28283
COBS01281	4.00157	4.54097	4.00157	4.00157	4.00157	4.00157	4.42128	4.00157	5.14736	5.11707	5.93575	4.00157	4.00157	4.00157	4.65334	4.00157	4.00157	4.25294	4.00157	4.32021	4.367	6.50814	4.47319	5.1338
COBS01282	7.55598	6.29661	6.59421	6.79907	7.09457	7.01004	6.78475	7.79223	6.91158	7.44956	7.35707	7.72759	6.97397	6.58485	6.45712	7.16945	6.92257	6.97205	6.97116	7.01899	7.87972	4.75941	6.83258	6.91779
COBS01286	6.30195	4.00157	4.53377	4.33497	4.00157	4.00157	8.10584	4.35454	4.00157	5.48382	7.09092	4.89485	4.44071	4.00157	4.37999	4.00157	4.00157	4.25294	4.88249	4.00157	4.81027	4.44244	4.81141	4.62658
COBS01289	4.00157	4.00157	4.00157	4.33497	4.72705	4.00157	4.92743	4.00157	4.00157	5.48382	6.1474	4.00157	4.00157	4.00157	4.00157	4.27229	4.37323	4.00157	4.00157	4.32021	4.00157	4.00157	4.70516	4.39871
COBS01292	4.00157	4.00157	4.00157	4.00157	4.00157	4.00157	4.00157	4.00157	4.00157	5.75833	5.77192	5.11173	4.00157	4.00157	4.00157	4.00157	4.00157	4.00157	4.00157	4.00157	4.00157	4.00157	4.23816	4.00157
COBS01296	9.69076	9.82904	9.62381	9.92704	9.65327	9.67302	9.75809	9.32547	9.72652	9.58489	9.79311	9.53294	9.77847	9.57002	9.78987	9.64367	9.70934	9.58651	9.5154	9.55594	9.53029	10.3522	9.73408	9.60476
COBS01297	9.87495	10.8028	10.3264	10.8473	10.1074	9.70695	10.7794	10.1669	10.4717	10.3808	10.4259	10.3709	10.0075	10.1818	10.5828	10.8346	11.0138	10.9091	10.9176	11.2493	10.2972	11.2415	10.9547	11.2674
COBS01299	7.8218	7.28649	7.24404	6.31294	7.04958	7.23227	7.86415	8.24736	7.88514	7.25537	6.98969	8.64707	7.82543	7.18347	7.94914	7.93217	8.08245	7.59648	8.62127	8.4044	8.12458	6.60335	7.09132	8.04969
COBS01300	11.9923	12.0214	12.3993	10.1788	9.97578	10.9304	10.3892	10.4192	9.90698	10.7863	10.6792	10.3709	12.4481	13.0499	12.4788	10.8346	10.934	11.608	10.6031	10.4578	10.9607	10.9018	10.8664	11.0745
COBS01301	8.48629	8.92394	8.60589	8.22941	8.33939	8.19181	8.42025	8.37878	8.55152	7.99868	7.83345	8.58708	8.7756	8.83125	8.75715	8.554	8.65981	8.77812	8.52788	8.6972	8.42341	4.00157	8.34164	8.29171
COBS01302	8.37042	7.94368	7.07518	8.99229	9.92909	9.33717	9.76264	9.70289	10.0915	8.33566	8.37321	8.88428	6.68402	6.48782	7.45758	8.60318	8.94939	8.57885	9.35493	9.39369	9.77629	8.51565	7.06797	8.08268
COBS01303	5.78095	5.28755	5.04887	6.62998	7.10559	5.96209	7.01928	6.50589	7.33436	5.80636	5.68094	6.29608	5.13829	4.00157	5.22342	5.92151	6.04657	5.62209	6.66346	6.5978	6.72893	4.00157	5.45586	5.66683
COBS01304	6.53418	7.7665	6.52477	9.81725	9.93215	7.2493	9.52657	8.27912	8.68085	6.6425	7.24493	7.95096	6.59518	6.801	7.12858	8.90883	9.1529	8.22786	9.18455	9.54537	8.26242	4.97278	6.75813	8.07942
COBS01306	4.00157	5.51326	4.53377	6.52309	6.14589	4.00157	6.72889	5.28301	5.72021	5.11707	4.87603	5.15866	4.96909	4.62407	5.11245	5.35964	5.90238	4.98896	6.38144	6.75646	6.05311	4.00157	5.08678	5.4562
COBS01309	10.2782	9.79448	10.2683	10.5403	10.6435	9.18787	10.617	9.86824	10.1629	9.57222	9.46171	10.0333	10.3821	10.4552	10.5818	11.1214	10.7416	10.8698	10.9471	11.0248	9.98784	9.11937	9.54516	10.3801
COBS01310	4.36517	4.66032	4.53377	6.00275	5.13166	6.4637	5.50816	5.19318	5.34422	6.17154	5.0648	5.24618	4.44071	4.00157	4.65334	4.54066	4.89988	5.63795	4.72447	5.0822	4.51701	4.44244	4.77775	4.87883
COBS01311	6.67442	8.07723	6.88316	9.01884	9.35355	8.64499	9.7095	9.49119	9.89734	7.99868	8.30549	8.99352	7.02535	6.97029	7.45758	9.10553	9.68237	8.87129	10.3767	10.5737	9.64649	9.36687	8.14163	9.04623
COBS01312	10.4537	10.2871	10.5603	10.1778	10.2092	10.9798	9.36561	9.30802	9.62316	9.60678	9.75815	9.60185	10.2412	10.4722	10.2631	10.3229	10.2955	10.4838	9.47224	9.40375	9.35691	10.7047	9.93139	9.52205
COBS01313	9.39215	9.56123	9.30209	9.61229	9.26654	9.20092	9.26027	9.23603	9.20056	9.09835	9.24066	8.99608	9.30231	9.12165	9.68689	10.0501	9.9776	9.71597	9.53551	9.56941	9.06824	8.28354	9.783	9.04623
COBS01314	8.57812	8.28067	8.6181	8.05802	7.8356	8.33312	7.34777	8.20074	8.04549	7.9699	7.83345	8.30191	8.5052	8.64706	8.33922	8.21725	8.29189	8.3322	8.35733	8.24896	8.14585	4.44244	8.3164	8.41844
COBS01315	8.91761	8.72564	8.68928	10.1177	10.3712	10.039	9.59696	8.69332	9.29411	8.42304	9.58655	8.97545	8.3939	8.59141	8.58434	10.4064	10.5883	10.2246	10.1464	10.1303	8.65961	4.44244	8.91105	9.00391
COBS01316	5.36249	5.38358	4.00157	5.17383	4.51723	4.00157	5.64749	4.35454	4.00157	4.46639	5.35526	4.59162	4.62026	4.7611	4.8384	4.27229	4.37323	4.50244	4.62923	4.70844	4.367	4.75941	4.66564	4.87883
COBS01317	4.51443	5.80089	4.75006	6.1019	5.01729	4.00157	4.42128	5.32512	4.00157	4.46639	5.58241	4.59162	5.34641	4.44343	4.53523	4.54066	4.64182	5.66905	5.12777	4.99172	4.81027	4.00157	5.08678	5.03348
COBS01318	9.70144	10.5839	10.3965	11.3392	10.1592	11.0779	10.2905	10.1596	10.2271	9.73729	10.1498	10.3846	9.99486	10.6322	10.8642	11.1662	11.1732	11.6354	11.6532	11.6296	10.2551	9.16937	10.0271	11.1381
COBS01319	9.91372	9.9009	10.1218	10.3539	9.48851	9.80987	9.62218	9.8229	9.64059	10.1971	9.56359	9.66439	11.4483	9.90012	10.1537	10.7818	9.94198	9.92798	12.5795	10.2156	9.78477	10.0101	10.6376	10.1985
COBS01320	7.70579	7.74369	7.63143	8.74573	8.43323	8.08295	7.96261	7.77319	8.04549	7.63267	7.24493	7.77634	7.4932	7.10526	7.63824	8.31813	8.18436	8.54906	7.96394	8.14049	8.14056	4.00157	7.81774	7.68696
COBS01321	13.4817	13.2492	13.2591	12.1901	11.6399	11.9186	12.7914	12.8586	12.9442	12.7763	12.7819	12.8562	13.7427	13.8646	13.3976	11.889	11.9715	11.8748	12.6052	12.779	13.1658	12.4506	12.9854	12.8929
COBS01322	7.69866	4.92543	5.36619	5.43608	5.45123	4.00157	7.04978	5.32512	5.95326	6.89193	5.58241	5.32668	5.34641	5.72605	4.9158	4.60343	5.36897	5.15144	4.88249	5.34434	5.48933	4.87342	5.23884	5.25292
COBS01323	9.00645	8.69832	9.44591	8.91213	9.37169	9.23726	8.51501	8.39128	9.06076	8.90476	8.67088	8.25122	9.36258	9.69921	9.38581	9.71437	9.56507	9.57549	9.17176	8.93573	8.08657	7.89163	7.54991	8.34972
COBS01324	9.50007	9.64733	9.84922	9.22363	8.69722	8.25169	9.44409	8.99828	8.89627	8.95443	8.9443	9.06607	10.0179	10.1398	9.66144	9.3923	9.35847	9.29765	9.41261	9.33702	8.72104	4.44244	9.25713	9.32722
COBS01325	7.69866	6.88524	7.03883	7.74048	8.87638	9.39509	9.22776	9.64328	9.56349	8.09952	7.35707	9.13281	6.97397	6.65333	7.28202	8.4963	8.67878	8.27643	9.35493	8.98128	9.52018	8.31126	6.64155	8.15269
COBS01326	13.1119	12.5155	12.2845	12.3281	12.3621	12.9184	11.7708	12.1205	11.7251	13.9187	13.9038	12.0607	12.2288	12.2632	12.5573	12.1162	11.9818	12.0903	11.413	11.3959	11.6855	13.3283	12.3662	11.7659
COBS01327	7.02569	7.736	7.96147	7.13122	6.47792	6.47854	7.1516	6.14585	7.01179	7.15586	6.91789	6.72356	8.15676	7.44646	7.05733	7.36229	7.459	7.32736	7.79333	7.50187	6.3877	9.09171	8.06901	7.77859
COBS01328	9.61936	9.32675	8.90725	9.90263	9.88716	9.64942	10.4623	9.89039	9.83983	8.93971	9.43665	9.53294	9.50903	9.59567	9.19151	9.56178	9.68331	9.31101	9.56906	9.69084	9.98048	8.66803	9.22936	9.49909
COBS01329	11.2488	10.6887	10.7652	10.7614	11.1378	13.4112	8.32496	9.35339	8.94388	10.3844	9.00525	9.15592	10.6432	10.6742	10.8295	9.27198	9.58328	10.0478	7.68168	7.80156	9.19837	11.8672	9.25713	8.46166
COBS01330	8.70749	8.66242	8.87031	8.71356	8.93248	9.55943	8.85031	9.16994	9.39113	9.44949	8.82378	9.56608	8.97765	8.89696	8.98908	9.49432	9.29233	9.36537	9.12208	9.12821	9.26535	9.65021	9.18078	9.01589
COBS01331	8.88673	12.742	9.8475	9.97341	9.30008	9.29317	9.21455	9.29701	8.69577	9.50385	9.99536	8.86477	11.595	10.5515	9.81495	10.4871	9.96454	10.577	9.36396	9.6264	9.81654	8.35186	9.79286	9.79635
COBS01333	10.1811	9.44406	9.84577	9.89744	10.388	10.8786	9.75353	10.086	10.1083	10.4654	10.0827	10.1356	9.84334	9.7735	9.82556	10.0401	9.98827	10.1627	9.5154	9.3527	9.9431	11.2831	9.63568	9.20855
COBS01334	10.5043	9.7305	10.5988	8.31776	7.26137	7.88084	8.97311	9.29922	9.15814	8.97383	9.10408	9.21432	9.83628	10.3519	10.4008	8.7772	8.45274	7.97928	9.48884	9.22224	9.6202	4.75941	9.47684	8.77339
COBS01335	8.6238	8.70618	8.77902	8.98496	9.42695	9.22454	8.67321	8.9286	9.34934	8.91984	8.61607	9.08064	8.77066	8.61393	8.89806	9.22908	9.21265	9.11169	8.92877	8.74553	9.21854	7.67338	8.52566	8.18038
COBS01336	9.73647	9.66958	9.1591	10.182	10.559	9.96319	9.8051	9.62578	9.86311	10.1013	10.0665	9.77444	9.28856	9.34986	9.29957	9.94802	9.78822	9.57272	9.24931	9.1877	9.52626	11.2406	9.94663	9.41636
COBS01337	10.5084	10.1091	10.0901	11.3737	11.5517	11.895	10.6688	10.1801	10.2898	10.0678	10.729	10.298	10.1904	9.76096	9.88598	11.5694	11.414	11.7175	10.4054	10.7372	10.0664	10.6049	9.66821	10.116
COBS01338	10.9912	10.8829	11.2139	10.958	11.0184	10.1884	11.1646	11.1849	11.4874	10.5257	10.5154	10.8684	10.9809	11.4229	10.9015	10.7828	10.9281	10.8182	11.3851	11.3324	11.2388	11.0851	10.75	10.8988
COBS01339	10.5582	10.5231	10.2291	10.2396	10.5737	10.4727	10.367	10.4202	10.3698	10.7276	10.9684	10.3237	10.5712	10.43	10.3637	10.3069	10.2875	10.4298	10.0037	10.0048	10.2937	10.2144	10.7446	10.1128
COBS01340	12.4268	11.0371	11.091	10.5176	11.3045	12.1136	11.0988	11.315	11.2092	11.5018	11.3534	11.1981	11.2561	11.3678	11.34	11.0186	10.9633	11.0679	10.8251	10.7504	11.059	11.9343	10.9007	10.5648
COBS01341	12.2237	12.3718	11.902	13.0685	13.362	13.0575	12.6919	12.4471	12.5851	12.6623	12.7435	12.3419	11.6102	11.6981	12.1189	12.7536	12.7085	12.6967	12.0016	12.3736	12.223	13.2078	12.4196	12.153
COBS01343	5.75126	6.20688	5.98302	7.65644	8.55746	6.08697	8.42025	6.64104	6.99965	6.24033	7.15456	6.65879	6.34378	5.93439	5.96058	6.40971	6.40232	5.95477	5.72372	5.75368	6.54451	4.62267	6.20744	6.27771
COBS01345	6.86759	6.58789	6.11074	6.98	7.82902	6.80504	8.59883	7.05757	7.73382	7.0672	7.15456	7.01877	6.10181	5.85523	6.20969	6.2288	6.46693	6.86558	6.6484	6.91793	7.08247	5.67629	6.02752	6.16639
COBS01346	7.0025	8.18255	7.93561	8.30995	7.9308	7.58656	7.67361	7.36967	7.69707	7.85913	7.32986	7.41706	8.01329	7.59048	7.90292	7.92881	8.03898	7.74243	7.79333	8.24148	7.12639	4.00157	8.40195	8.00907
COBS01347	12.9366	13.4017	13.0751	13.6739	13.2954	12.9506	13.0619	12.5476	12.8372	12.4976	12.8301	12.6267	13.1828	13.165	13.2071	13.0086	12.9292	12.8951	12.7108	12.8519	12.6394	13.4845	12.767	12.864
COBS01348	11.7576	10.9653	11.2226	10.4799	10.9024	11.7117	11.3175	11.3607	11.3476	10.9147	10.747	11.3535	11.4421	11.8997	11.4804	10.971	11.1944	11.1825	11.201	11.2111	11.3406	10.8579	10.5887	11.2246
COBS01349	9.25389	9.93469	10.0381	9.64053	8.62337	8.41766	8.64884	8.38712	8.7215	8.37272	8.79447	8.46644	9.86202	9.81776	9.82203	9.5607	9.66916	9.73343	9.45334	9.40542	8.3657	10.3219	9.71864	9.61604
COBS01350	7.51593	7.43688	8.04242	7.35447	6.89251	6.80504	6.9881	6.7509	6.21646	7.33324	6.88056	6.87899	7.81584	7.86948	7.62199	7.38711	7.26007	7.40901	7.01836	6.99214	6.7574	4.00157	7.60573	7.22906
COBS01351	10.1041	9.48342	9.74556	8.70169	8.87001	9.96064	8.78475	8.98461	9.34698	9.59118	9.29047	9.01137	9.81966	9.80804	9.62341	9.1608	9.13517	9.35144	8.85062	8.68348	9.06546	10.4811	9.41702	9.01248
COBS01352	12.064	11.1399	11.1134	10.8331	11.2338	11.1692	11.2792	11.4828	11.5563	11.6849	11.6543	11.5295	11.5689	11.4229	11.1589	10.6701	10.6072	10.4897	10.797	10.8695	11.3958	12.6301	11.3344	11.0221
COBS01353	9.4031	9.82183	10.2824	9.55244	9.9743	9.35284	9.72355	9.03588	9.40026	8.76697	8.9967	8.79285	9.85271	10.2023	10.0183	9.95379	10.345	10.0485	10.3394	10.5331	9.43224	8.49164	9.76521	9.64164
COBS01354	9.74337	7.61541	6.937	10.8634	9.15834	9.20955	10.7994	12.3005	8.66578	17.248	16.5264	8.73261	12.4881	6.73964	7.41096	11.7193	8.13018	8.91279	13.525	9.46593	13.6806	15.7205	8.55748	12.1561
COBS01355	8.11154	9.11893	9.1812	9.04257	8.22906	8.74348	8.16212	8.45222	7.96139	7.62034	7.73363	8.05819	9.1548	9.14114	9.61934	9.5056	9.45945	9.61101	9.09794	8.91476	8.02472	7.75665	8.67205	8.46666
COBS01356	10.2841	10.2078	10.451	10.5845	10.3289	11.1966	9.53456	9.6878	9.63481	10.1511	10.0868	9.6252	10.1262	10.2515	10.533	10.2247	10.1873	10.4394	9.58458	9.75252	9.59729	11.576	10.1235	9.72524
COBS01357	8.73202	9.36445	9.92317	9.08887	8.02007	8.08295	7.95466	8.40778	8.53917	8.48526	8.30549	8.33067	9.76116	9.90468	9.14986	8.84274	8.98029	9.26599	8.92572	8.98352	8.53634	8.5334	9.38195	9.24533
COBS01358	5.5557	6.15961	5.16646	7.18397	4.63148	9.23726	5.64749	5.04052	5.2506	6.48456	6.01026	5.74155	5.96153	4.87534	5.27454	5.12336	5.27726	7.5367	4.95071	4.55127	5.01687	4.44244	5.08678	5.06816
COBS01359	9.84477	10.3359	10.5926	9.68188	8.95673	8.02526	9.51584	9.34485	9.24683	10.2458	10.6711	9.6351	10.3625	10.5817	10.7028	9.74419	9.33716	9.90982	9.51945	9.67292	9.56418	10.8579	11.2784	10.566
COBS01360	13.606	12.3853	12.4806	12.6322	12.6121	14.2239	13.1635	13.5803	13.33	13.1219	13.0307	13.1555	12.3675	12.5663	12.7857	13.1653	13.1548	13.0725	13.2845	13.257	13.5075	14.3784	12.8785	13.0005
COBS01361	12.7981	12.29	12.1475	12.3706	12.932	13.221	12.4675	12.6043	12.6216	12.4268	11.9679	12.4791	12.1794	12.3125	12.2189	12.1002	12.133	12.0321	11.8866	11.9659	12.7271	12.578	11.953	11.8618
COBS01362	9.66007	9.39876	9.52362	9.53248	9.71495	10.039	9.28891	9.68442	9.48847	9.77369	9.29047	9.74885	9.54704	9.49325	9.60914	9.78455	9.67861	9.78299	9.54744	9.47072	9.61451	7.75665	9.84664	9.3327
COBS01363	10.4196	9.98395	10.201	10.0302	10.487	10.8731	10.164	10.2503	10.2575	10.3421	10.1651	10.0896	10.1184	10.1647	9.99815	10.0715	10.0079	9.92002	9.89426	9.87092	10.3598	10.8018	9.98709	9.84795
COBS01364	10.6446	10.839	10.5582	11.0975	11.2951	10.4001	12.2171	12.5066	12.204	12.1833	12.1251	12.802	10.7709	10.83	10.7657	11.3384	11.2518	11.1102	12.2568	12.3077	12.6505	12.4656	12.368	12.6419
COBS01366	9.17944	9.06804	9.45047	8.78847	8.58107	9.20524	8.08416	8.62795	8.46272	9.19654	9.51055	8.54565	9.35601	9.0979	9.2426	9.09063	9.12691	9.1444	8.9104	8.68898	8.23291	8.70503	8.95192	8.69252
COBS01367	4.62807	5.59206	5.31979	5.03593	4.72705	4.33945	5.40469	4.00157	4.00157	6.27342	5.35526	4.83041	5.21259	5.14504	5.27454	4.92491	4.58682	4.98896	5.12777	4.7744	5.01687	4.00157	6.16245	5.75943
COBS01368	5.62457	7.01939	6.50685	8.6987	9.03283	8.41766	8.77127	7.264	7.55632	7.63267	7.62629	7.67067	6.28732	5.81367	6.81879	8.30266	8.57931	8.27188	8.15336	8.39432	7.65278	7.83534	7.62809	7.83398
COBS01369	4.36517	5.76851	4.65157	7.14015	7.04958	5.48699	7.1516	6.24542	6.27989	6.17154	6.01026	5.79404	5.76085	5.06398	5.41429	5.62866	5.96996	5.50451	6.0942	6.4454	6.16711	4.00157	6.06753	6.36937
COBS01370	4.62807	5.55334	4.00157	5.80197	5.52733	4.58417	5.92042	4.35454	5.75188	5.11707	4.00157	5.15866	5.05767	4.7611	4.7521	5.06201	5.09339	5.4123	5.55836	5.73045	5.01687	4.62267	5.06291	5.58716
COBS01371	6.51767	6.55249	5.98302	10.1109	8.04296	9.03349	6.83845	5.19318	6.14982	5.42	6.08065	5.28722	6.16662	6.38331	5.81495	9.90269	9.41041	9.77338	6.73642	6.7882	5.72866	4.62267	5.8535	5.54516
COBS01373	4.00157	5.28755	4.00157	6.17608	4.81061	5.41991	4.42128	4.00157	4.00157	4.00157	4.00157	4.00157	4.96909	4.00157	4.00157	4.27229	5.17648	4.61349	4.36585	4.45129	4.00157	4.00157	4.47319	4.28283
COBS01374	6.70373	6.67257	7.33643	7.11318	6.44288	7.48996	6.36032	6.12499	6.77524	6.66714	6.76212	6.11007	7.85383	7.80222	7.08148	7.02445	7.15997	6.81551	6.69311	6.52374	6.6851	4.00157	6.94499	6.61194
COBS01375	8.88985	8.92394	9.27409	8.59976	8.88588	8.36444	8.35542	8.25194	8.25164	7.73904	8.15964	8.15795	9.30913	9.37642	9.15829	9.20299	9.25114	9.32973	8.95291	8.7717	8.1616	8.58538	8.35506	8.29734
COBS01376	8.86155	8.31708	8.74602	7.41437	7.63886	7.91304	8.69241	8.49531	8.54742	8.66321	8.51183	8.97024	9.0487	9.32962	8.53769	8.10874	7.84719	8.25582	8.24435	8.31815	8.59544	5.06167	8.41115	8.60684
COBS01377	10.4735	10.6767	11.6403	9.59956	8.48838	8.74942	9.13264	9.48538	9.16083	9.0716	9.12776	9.77444	11.1423	11.8655	11.2111	9.92888	10.055	10.0871	10.0713	9.83913	9.1361	9.96515	9.9282	10.3269
COBS01378	10.8132	10.7151	9.70611	11.6145	12.6399	11.5839	11.7256	11.8832	12.0789	10.7863	10.8666	11.6462	9.97141	9.837	10.1066	11.6412	11.5962	11.4637	11.2948	11.122	11.882	10.9964	10.2331	10.6615
COBS01379	8.99202	8.60893	8.03026	9.02838	9.64023	8.96628	9.06063	9.38909	8.96864	9.15467	9.08807	9.11406	8.28022	8.31719	8.46246	9.33277	9.22817	9.30212	8.88866	8.84993	9.36145	9.95861	9.09218	8.84036
COBS01380	10.5844	9.72278	10.3571	8.68971	9.29296	8.71645	9.31699	9.31022	9.40707	11.5939	11.4236	10.5393	10.2589	9.90924	9.03252	7.98811	7.97274	7.8227	8.57922	8.37052	9.30833	11.7356	11.2876	10.2573
COBS01381	9.85118	9.78154	9.91001	9.98569	8.73629	10.2207	10.6928	10.2423	10.801	10.0924	9.96502	10.2761	9.60362	9.60412	9.66144	9.44948	9.66727	9.60741	10.6031	10.8321	10.2055	9.54054	10.1352	10.3507
COBS01382	10.8568	11.3752	11.7221	10.7642	10.1748	10.2186	11.6854	11.8417	11.4156	11.1091	11.2458	11.8011	11.9651	11.9037	11.5477	11.6503	11.6108	11.6181	12.3317	12.1241	12.086	11.52	12.189	12.5975
COBS01383	12.3514	12.8724	12.518	13.2355	12.9758	12.712	12.8598	12.6147	12.7045	12.0657	12.1883	12.328	12.2665	12.4308	12.629	12.84	13.0154	12.8932	12.8405	12.9189	12.6628	12.5925	12.3232	12.4727
COBS01384	8.22472	8.18255	8.84283	8.44443	8.7537	8.79892	8.65375	8.92574	9.25188	8.52529	8.77459	9.06851	8.96041	9.01157	8.49392	8.97364	9.05474	8.90987	9.41695	9.43518	8.78673	9.90061	8.44916	8.6226
COBS01385	7.3249	7.75133	8.12476	7.88979	7.54545	5.82348	8.78922	7.85995	7.63622	6.8498	8.42518	8.03837	8.19419	7.71081	7.9749	8.54964	8.52373	7.76861	8.87293	8.92412	7.33688	4.00157	8.0096	7.69125
COBS01386	11.8428	11.4087	11.7812	10.9079	10.553	11.4479	10.7431	11.1867	11.043	11.1426	11.1295	10.9393	11.5985	11.7112	11.8953	10.8752	10.8501	10.9742	10.6201	10.7111	11.2747	11.7079	11.2921	10.9518
COBS01387	11.5439	11.3893	11.7287	11.5494	11.8342	11.2488	11.8918	11.696	11.8131	11.6782	11.6611	11.6207	11.7205	11.5652	11.4418	11.4403	11.3363	11.151	11.5684	11.478	11.6245	11.5993	11.6927	11.2294
COBS01388	6.4669	7.18792	5.77925	7.80877	7.04958	6.88412	11.3252	11.3068	10.8325	9.7598	9.99964	10.5463	6.97397	6.56123	6.16356	6.43924	7.10995	6.34944	8.95291	9.95431	10.9366	10.7099	9.40787	10.1466
COBS01389	11.0716	11.5543	11.7027	11.9855	11.5836	11.8374	10.9404	10.8207	10.8079	10.7642	10.7187	10.8106	11.18	11.4021	11.8208	12.0935	12.0521	12.3107	11.3767	11.3593	10.8855	9.85436	10.9469	11.135
COBS01390	8.84236	9.9179	10.065	10.382	10.041	9.60921	9.19114	9.05693	8.80296	8.75019	9.18907	9.28099	9.78338	9.75338	10.2461	10.6489	10.4463	10.5696	9.79101	9.65196	8.94348	7.9634	9.31992	9.35576
COBS01391	11.8201	10.7872	12.9206	7.20113	5.41113	6.12604	8.99259	10.1201	9.03462	8.75019	9.00525	10.2538	12.2968	12.4304	13.2457	5.59122	5.36897	6.4939	10.7445	11.0639	10.9343	11.4969	10.7977	11.6818
COBS01392	9.61748	9.45342	8.81835	10.5428	10.7864	10.2409	11.6613	10.4533	10.7732	10.1035	10.2752	10.2548	8.8383	8.83604	8.93777	10.691	10.7711	10.256	11.5298	11.3624	10.5408	11.0751	10.0844	10.112
COBS01393	7.5401	8.43062	8.14745	7.92095	7.67604	7.76207	9.82696	9.67084	9.47342	9.43207	9.90236	10.0043	7.9446	8.11075	7.67807	8.48493	8.90661	8.68193	9.87703	10.6817	9.52626	8.47336	10.081	10.4847
COBS01394	5.01193	4.84726	4.75006	4.33497	4.51723	4.00157	4.42128	4.35454	5.47076	4.79992	4.62456	4.59162	4.75649	4.44343	4.00157	4.65994	4.52574	4.82511	4.51538	4.32021	4.81027	4.00157	4.96043	4.4872
COBS01395	11.3792	11.0875	11.2299	9.48308	8.8604	8.99405	10.7058	11.1675	10.6836	10.5092	9.97376	10.7144	11.6267	11.571	11.1413	10.1497	10.0802	10.109	11.0534	10.6462	11.0611	9.59501	10.6895	10.9717
COBS01396	12.463	11.8389	11.6902	12.1676	13.0084	13.0346	12.6511	12.7639	12.8328	12.4074	12.1014	12.6094	11.909	11.8899	11.8725	12.0566	12.0986	11.9407	12.102	12.2865	12.5702	12.126	11.6867	11.626
COBS01397	9.10093	8.76379	9.38534	8.73703	9.17652	8.98149	8.93333	8.99556	8.71785	8.75019	8.88992	8.85915	9.05277	9.3364	9.28169	8.98819	8.86417	9.12814	8.72657	8.65	9.02594	8.144	9.09218	8.65361
COBS01398	9.5183	9.68356	9.64384	9.91553	9.65697	9.55266	10.3014	8.74939	9.1033	9.95288	9.74801	9.25555	11.2806	9.52623	9.75141	10.1163	9.35847	9.60921	10.8574	8.79995	8.9794	10.6435	10.1224	9.52325
COBS01399	5.12576	5.28755	4.91335	5.59073	5.18399	4.00157	4.72355	4.78321	4.64053	4.00157	4.00157	4.00157	4.96909	4.7611	5.27454	4.92491	5.14959	4.74829	5.01375	5.37683	5.28042	4.00157	5.15492	4.73885
COBS01400	7.75471	8.907	7.49602	9.42833	9.92603	9.31933	8.72074	8.22889	8.60387	6.76149	7.79436	7.62477	7.50522	6.93441	7.88943	8.28178	9.05038	8.42946	7.62995	8.11614	8.30084	8.44862	7.33718	7.49375
COBS01401	8.55078	8.76379	7.98056	8.30995	8.04296	8.84401	8.40868	7.8897	7.85879	8.21838	7.96243	7.73377	8.91638	8.7472	8.61735	8.66892	8.90016	8.86677	9.11408	9.02544	7.97205	8.38485	8.24203	9.53637
COBS01402	5.80992	5.33666	5.6455	5.53139	4.63148	4.00157	4.72355	5.47861	4.73743	6.56582	6.80273	5.93928	5.9239	5.89544	5.84548	5.42776	4.69219	5.53935	5.40639	5.27619	4.72674	4.00157	6.7284	6.30123
COBS01403	10.3725	9.93803	10.1204	9.54582	9.54554	10.6062	9.54251	10.4192	10.144	9.83328	9.47408	10.0943	10.1867	10.7086	10.3733	10.3254	10.2782	10.5378	10.336	10.3448	10.5054	9.46558	9.71567	9.9821
COBS01404	12.0539	11.3117	11.5646	11.2085	11.4428	11.1435	11.3519	11.1814	11.0966	12.7959	12.7351	11.3929	11.3334	11.2931	11.3927	11.437	11.0665	11.1655	11.0755	11.164	11.2394	12.1348	13.0956	11.8644
COBS01405	10.566	10.1267	10.3883	11.2442	11.5387	11.0091	10.5879	10.4573	10.6128	11.2538	11.0409	11.0302	10.0771	10.5832	10.3925	12.2717	11.7561	12.1337	10.916	11.1205	10.8374	11.706	11.3104	11.0012
COBS01407	4.36517	4.54097	4.53377	5.4024	6.00528	8.91703	6.92356	8.10775	4.00157	5.98173	6.27146	5.81946	4.87008	4.87534	4.65334	4.84678	4.78259	5.53935	5.17993	4.99172	5.78899	5.41255	4.74242	4.99739
COBS01408	9.83349	10.5775	10.0886	11.1138	10.8015	10.3983	11.5081	10.5268	11.0357	10.3477	10.6024	10.4251	10.0488	10.0744	9.96332	10.5992	10.7412	10.4615	11.0872	11.2135	10.659	11.1227	10.7977	10.6484
COBS01409	11.4006	10.7044	11.4607	8.95026	8.04296	8.86604	10.4623	10.7627	10.3593	10.1425	9.64787	11.017	11.5689	11.8431	11.0575	9.12322	9.04892	9.46632	10.2571	10.1513	10.821	10.0123	10.1291	11.135
COBS01410	6.5983	8.18818	8.99723	7.86863	6.75833	7.98041	6.2017	6.99255	6.70167	6.95283	6.27146	7.12702	8.3939	8.76742	8.74973	7.91529	8.16023	8.31237	7.99342	7.533	6.83944	4.00157	7.67792	7.4689
COBS01411	11.0736	10.901	10.6551	10.4042	10.3791	10.1697	10.3715	10.3801	10.591	10.479	10.3675	10.5082	11.0271	10.8784	10.7304	10.7777	10.764	10.7902	10.7769	10.6845	10.5176	10.7834	10.5736	10.5324
COBS01412	11.4201	11.5068	11.5839	10.5403	9.58495	10.7268	9.81826	9.62226	9.73195	9.74295	9.68558	9.6351	10.9131	11.6349	11.3609	11.3634	11.0517	11.6343	10.7323	10.3033	10.0468	10.8307	10.289	10.3801
COBS01413	4.62807	5.42853	5.60956	5.08422	4.72705	4.88375	5.08996	4.92207	5.14736	5.54418	4.87603	5.11173	5.40739	5.72605	5.71851	4.84678	5.20265	5.33246	5.72372	5.27619	4.00157	4.00157	5.13275	5.25292
COBS01414	11.4463	10.0064	10.7169	9.39923	9.86492	10.1552	10.2376	10.0537	10.2233	10.0103	9.9385	10.0751	10.746	10.9464	10.5427	9.92301	9.81073	9.95588	9.94324	9.81293	9.81984	10.5566	9.95293	9.75207
COBS01415	6.68916	8.10131	7.74019	8.51743	7.37468	7.4167	7.43076	7.42785	7.40009	7.17294	7.85261	7.19181	8.09476	8.13435	7.75454	8.22274	8.37107	8.50124	8.33911	8.09968	7.49529	4.00157	8.39826	8.29171
COBS01416	10.5245	11.2317	10.8819	12.0353	11.7497	11.5081	10.3505	10.2616	10.6789	9.51713	9.37204	9.95119	10.6739	10.5774	11.1742	12.2059	12.0746	12.0354	11.134	10.8882	10.361	8.71024	9.70601	9.94502
COBS01417	4.00157	5.47171	4.00157	5.25583	5.01729	4.00157	4.72355	4.00157	5.14736	4.91966	4.87603	5.11173	4.44071	4.97491	4.98643	4.65994	4.69219	4.25294	4.80775	4.63505	5.45065	4.00157	5.01317	5.03348
COBS01418	6.24211	7.21042	8.36135	7.19258	7.5129	8.33707	6.93998	6.45769	6.52445	6.51219	6.48944	6.27862	6.92062	8.02917	7.79853	7.38711	7.23958	7.67132	7.02991	6.81924	6.56087	5.57798	6.02752	6.40219
COBS01419	6.11356	6.36013	5.60956	7.2839	7.29056	6.30558	8.76675	8.40368	8.68085	7.18982	6.84219	8.11604	5.96153	6.17805	6.25427	6.89796	7.1435	7.02787	8.52788	8.71888	8.14585	4.44244	6.63514	8.03628
COBS01420	8.78992	8.98008	9.50623	8.51064	8.0655	6.14514	8.34938	8.5334	8.33983	8.71602	8.53566	8.63725	9.29545	9.58148	9.4444	8.7007	8.84415	8.73083	9.16403	8.91005	8.6743	4.44244	9.18507	8.85186
COBS01421	10.5195	8.98977	10.9976	8.38992	7.66868	8.27248	6.63044	6.66934	7.02382	13.4724	13.2496	10.8995	9.15101	9.8056	9.02946	8.47807	8.19496	8.5263	8.4323	8.32878	7.03713	13.8498	14.5178	12.7762
COBS01422	4.00157	5.28755	5.16646	7.61249	5.28094	6.5221	4.00157	5.09424	5.14736	4.00157	6.53884	5.56859	5.21259	4.44343	5.75152	5.23529	5.12191	7.38373	5.07255	5.20316	4.51701	4.00157	6.38124	5.98665
COBS01423	11.5537	11.6777	12.1405	11.7234	11.3943	11.4967	11.2768	11.1419	11.0966	12.7506	13.1331	11.6661	11.533	11.7312	11.6991	11.626	11.3763	11.5276	11.2788	11.2413	11.1968	11.9575	13.5897	12.4829
COBS01424	5.36249	4.54097	4.37895	4.93054	4.88559	4.00157	5.08996	4.85579	4.37248	4.91966	5.0648	4.68136	4.62026	4.7611	4.65334	4.75966	4.37323	4.35662	4.36585	4.55127	4.367	4.00157	5.31627	4.68519
COBS01425	7.28721	9.13357	7.9994	10.1788	9.78936	7.38631	10.3848	8.87625	9.45164	6.89193	7.7128	8.35887	7.36704	7.70028	8.26819	9.54548	9.99584	9.2499	9.93569	10.2707	8.94651	8.83946	7.5057	8.99184
COBS01426	5.07063	4.38409	4.37895	5.6744	4.51723	6.30558	6.14427	4.92207	4.82212	6.36801	6.43818	4.48445	6.74707	4.00157	4.00157	5.99188	4.00157	5.9052	7.83304	4.63505	4.00157	4.44244	4.57792	4.62658
COBS01427	5.22726	4.54097	4.37895	4.57651	4.36716	4.00157	4.00157	4.00157	4.37248	5.02391	5.47464	5.24618	4.44071	4.00157	4.37999	4.00157	4.26473	4.00157	4.00157	4.55127	5.01687	4.00157	4.52828	4.78856
COBS01430	4.62807	5.28755	4.91335	6.68045	5.59862	5.55026	8.1552	8.25651	8.33983	7.28703	7.27381	7.43241	4.87008	4.7611	5.05165	5.40553	5.4933	5.35299	6.76455	7.85658	8.1977	4.00157	6.18064	7.22311
COBS01431	4.00157	4.38409	4.37895	4.98486	4.51723	4.00157	4.72355	4.00157	4.00157	4.00157	4.00157	4.34381	4.00157	4.44343	4.65334	4.27229	4.45613	4.25294	4.36585	4.55127	5.56291	4.00157	4.84358	5.10156
COBS01432	5.97084	4.66032	4.37895	4.93054	5.07627	6.08697	5.88495	5.19318	6.81756	5.27975	4.87603	5.89273	4.44071	4.00157	4.37999	4.00157	4.26473	4.43587	4.62923	4.63505	6.07673	4.97278	4.96043	4.87883
COBS01433	9.65825	9.38415	9.41594	10.094	10.3791	11.1396	12.9018	13.1016	12.7465	12.7649	13.0154	12.5769	9.36258	9.64837	9.70617	11.9362	11.699	11.9379	12.5248	12.4459	13.7495	13.2292	12.3257	13.0582
COBS01434	11.4823	10.5396	11.271	9.61387	9.75003	10.624	10.0043	9.99356	10.0716	10.6574	10.5332	9.84435	11.1939	11.2922	11.0791	10.4291	10.3265	10.4575	10.0152	9.94859	10.2243	12.2306	10.3004	10.041
COBS01435	11.6989	11.334	11.5073	10.8627	11.2363	11.3262	11.3913	11.6753	11.7937	11.7446	11.613	11.6315	11.5489	11.7027	11.3742	11.2308	11.0437	10.9735	11.2728	11.0912	11.751	11.1782	11.3863	10.9883
COBS01436	9.72953	10.0032	10.0152	11.1426	10.8198	10.4474	11.9587	11.0433	11.6265	10.5805	11.1275	10.5073	9.70538	9.65922	9.54848	10.7149	10.7711	10.703	11.2364	11.5481	11.0541	10.3981	11.3187	10.797
COBS01437	5.36249	4.92543	4.00157	4.98486	4.81061	4.33945	4.59308	5.28301	4.82212	4.00157	4.00157	5.06232	4.44071	4.00157	4.37999	4.27229	4.00157	4.43587	4.00157	4.70844	4.51701	4.44244	4.70516	4.4872
COBS01438	9.95595	10.1165	10.6892	9.41748	8.89218	9.85182	8.66837	8.99828	9.24935	9.91075	9.29745	9.18766	10.4607	10.6594	10.8522	9.95132	10.2538	10.2473	9.75374	9.82047	9.08757	10.3802	10.1566	9.60815
COBS01439	8.46133	9.82364	10.6472	9.24423	7.52927	7.49708	8.98093	8.62443	8.37271	8.24261	7.90857	9.97606	10.3091	10.9986	10.4497	9.94305	9.7856	9.95871	10.4313	10.5422	8.35204	4.00157	9.4873	11.585
COBS01440	9.10362	9.68951	9.61573	9.99787	10.3149	10.5221	9.77618	9.69117	9.34698	9.82796	9.51654	9.74428	9.59248	9.28476	9.68883	10.3773	10.0901	10.0128	9.78598	9.63782	9.77799	9.50205	10.1196	9.35306
COBS01441	11.247	10.6536	11.7132	10.1076	9.8227	10.8192	10.817	11.1102	11.3935	10.7986	10.8478	11.2343	11.0639	11.4372	11.266	10.6924	10.7613	10.8732	11.2722	11.3563	10.9312	11.8431	10.6171	11.2403
COBS01442	8.78992	9.01212	8.63021	8.83813	8.74676	9.33125	8.83312	8.61736	8.96864	8.26645	7.87151	8.61071	9.2394	9.168	8.77919	8.9474	9.11304	8.89663	9.10064	8.96324	8.90353	9.37017	8.69631	8.80332
COBS01443	11.8103	11.4972	11.3529	11.2236	11.2351	10.7587	11.6692	11.8691	11.6434	11.2238	11.1699	11.387	11.4296	11.73	11.5913	11.4711	11.3774	11.346	11.5974	11.6321	11.9136	11.665	11.5643	11.4482
COBS01444	4.80628	4.00157	4.00157	4.33497	4.00157	4.00157	4.00157	4.00157	5.38807	4.00157	5.22066	4.00157	4.00157	4.00157	4.00157	4.00157	4.00157	4.00157	4.36585	4.55127	5.01687	4.00157	4.00157	4.00157
COBS01445	12.6192	12.1449	12.4477	12.5055	13.0496	12.7596	13.615	13.6891	14.1202	12.8268	12.6553	13.358	12.5138	13.0737	12.4664	12.3317	12.5289	12.079	13.3047	13.3613	13.6189	12.8862	12.3527	12.9069
COBS01446	11.7954	11.4366	11.4442	9.43372	9.27861	9.42319	10.3077	10.1025	9.92289	10.3588	10.5214	10.297	11.7757	12.2074	11.7334	10.0331	10.1873	10.2217	10.361	10.1583	10.3857	11.1324	10.5609	10.6858
COBS01447	17.0194	16.5977	17.8696	11.7455	8.53749	10.5495	6.28338	6.49001	6.59158	9.28847	8.71326	9.05136	16.2248	17.5758	17.9968	11.6089	10.2826	11.9643	9.73125	10.5959	5.66513	9.68234	9.79076	9.65264
COBS01448	5.72083	5.28755	4.91335	4.93054	5.13166	4.00157	4.92743	4.35454	4.00157	4.46639	4.00157	5.01005	5.13829	5.58125	4.7521	5.51245	4.78259	5.24602	4.72447	4.94267	4.51701	4.44244	4.00157	4.4872
COBS01449	8.6461	8.22699	8.76811	7.27584	6.60969	7.43166	7.53078	7.68762	6.78949	8.46482	8.31929	8.02836	8.99891	8.64706	8.39742	7.69152	7.64123	7.77508	7.81332	7.48923	7.32754	4.00157	8.28271	8.19553
COBS01450	9.66553	9.84867	10.7319	9.28059	9.086	9.69316	9.42988	9.34057	9.32079	9.83062	9.50454	9.67562	10.292	10.5631	10.3721	9.4715	9.5933	9.95091	9.34129	9.16814	9.19583	10.0311	9.62625	9.74592
COBS01451	7.72696	8.25944	7.43247	8.65932	10.2661	8.70428	7.28536	7.27311	7.30523	10.0359	10.2787	8.69206	6.13462	6.38331	6.81879	7.96862	9.31795	9.36431	7.47084	7.93301	6.6851	10.6147	10.7515	9.56807
COBS01452	6.13588	7.43688	6.52477	8.12638	7.92465	7.65175	8.96524	9.61341	9.43398	8.03618	7.97994	8.51019	6.52454	7.13707	7.5636	8.03884	9.0165	7.99321	9.07888	9.38863	8.55631	6.04053	7.36415	8.54438
COBS01453	9.11165	9.75151	9.42291	9.54083	9.24947	8.99654	7.88941	8.11279	7.62843	9.87512	9.49243	8.604	9.79071	8.89236	8.98276	8.90201	8.98029	8.91571	7.79333	7.56346	8.4747	10.7459	9.57161	8.6558
COBS01454	6.37778	7.52	6.62765	8.76868	8.7537	7.46111	9.78291	9.18675	9.05788	8.09952	8.08074	8.1018	6.70536	6.87879	6.63342	8.34605	8.50258	8.35391	8.87609	9.13427	8.91903	10.1565	7.58954	8.54674
COBS01455	4.00157	4.92543	4.37895	5.70102	4.72705	4.00157	5.88495	4.00157	5.03153	4.91966	4.62456	4.00157	4.62026	4.62407	4.53523	5.06201	5.14959	5.19987	5.32166	5.73045	4.00157	4.00157	4.96043	5.22446
COBS01456	4.80628	6.08533	5.27122	7.63777	7.4281	4.58417	7.65407	7.264	7.6206	5.98173	6.76212	6.72356	6.42424	5.35425	5.11245	6.63811	6.51126	6.23717	6.95911	7.178	7.32754	4.44244	6.14402	7.01794
COBS01457	4.72315	4.00157	4.00157	4.57651	4.81061	4.33945	5.45763	4.00157	4.64053	4.91966	4.62456	5.11173	4.00157	4.00157	4.37999	4.27229	4.00157	4.66171	4.36585	4.45129	4.63121	4.00157	4.41045	4.00157
COBS01458	8.95083	8.07114	7.74019	8.97513	8.51723	6.63186	10.1484	9.7521	9.52021	7.97956	8.6492	9.08786	8.46905	8.45461	8.88457	9.39958	9.15154	9.19331	9.81424	9.95202	9.22604	7.85435	8.93163	9.63943
COBS01459	11.2746	11.369	11.5397	10.7001	10.4221	10.9854	10.2012	10.086	10.0702	10.5962	10.5214	10.3217	11.0689	11.9014	11.7994	11.163	11.6526	11.2065	11.0687	11.0958	10.1774	8.95365	10.4912	11.2046
COBS01460	9.25389	9.42278	9.84577	8.74573	8.33477	9.92702	9.30146	9.17476	8.6274	8.88952	9.14334	8.7958	9.3361	9.40249	10.2249	8.98819	9.07634	9.06777	9.12474	9.02326	9.26777	10.9277	8.96321	9.13831
COBS01461	9.09013	9.62886	9.77854	9.21113	8.31142	8.47974	7.97051	7.82341	7.92377	9.38577	9.39823	8.17619	9.67665	9.23846	9.56968	8.35857	8.55898	8.73249	7.93384	7.76541	7.93583	9.79927	9.89456	9.16774
COBS01462	13.1793	11.5608	11.6091	11.7354	12.4856	12.4006	13.5216	13.9919	14.5294	14.121	13.6982	14.5984	12.5628	12.4477	11.1982	12.2906	11.7368	11.7458	13.1381	13.3408	13.8432	14.6512	13.3445	13.6167
COBS01463	8.06254	7.95695	8.35163	8.04865	8.33477	8.19617	8.52576	8.66616	8.71053	9.17994	8.70278	9.034	8.00488	8.01229	7.9685	8.54308	8.43275	8.56775	8.50355	8.38077	8.85923	4.00157	8.72165	8.78343
COBS01464	9.85756	10.7459	11.3777	9.34876	8.71155	8.6765	7.85563	7.81102	7.95518	7.8902	7.89016	7.6771	11.4059	11.6567	11.3584	10.2226	10.5898	10.6805	9.63391	9.72335	7.78101	8.27652	9.36504	9.51484
COBS01465	9.16921	9.62266	9.37339	9.05662	9.30245	8.1698	9.29833	9.7521	9.25188	8.93477	9.30439	9.76846	9.94537	9.50533	9.30969	9.82741	9.91746	9.67438	9.79268	9.69084	9.47269	8.44862	9.53428	9.447
COBS01466	8.99202	9.4036	10.1445	9.78387	8.7606	9.61572	9.51853	9.84273	10.3985	8.52529	8.52379	10.1472	9.6554	10.0186	9.85523	10.4046	10.4002	10.513	10.834	10.8719	9.47479	7.98941	8.88227	10.5942
COBS01467	7.28721	10.5646	6.59421	6.62998	6.23182	7.23227	7.59376	6.77705	7.11656	7.87992	7.73363	7.21869	9.54704	8.36448	6.81879	6.71179	6.6984	6.76356	6.72213	6.98308	8.00155	9.5229	8.16794	8.06628
COBS01468	5.65754	5.28755	4.91335	5.25583	4.88559	4.00157	5.08996	4.78321	4.64053	6.17154	5.22066	5.53709	5.05767	4.87534	5.11245	4.99619	4.89988	4.82511	4.95071	5.16451	4.63121	4.44244	5.48813	5.50157
COBS01469	9.19464	8.99298	8.14181	8.30603	8.64219	10.3157	8.7981	8.66616	8.59594	9.08949	8.68159	9.27467	8.95171	8.76239	8.67334	8.8158	8.51531	8.88476	8.5518	8.97003	9.06824	9.66904	8.19803	8.8442
COBS01470	9.04051	9.30623	9.66751	8.9275	8.57716	8.01046	8.80253	8.71004	8.37735	9.41444	8.72367	9.01643	9.5528	9.22391	9.35193	9.29946	9.29356	9.34496	9.32058	9.35616	8.59157	5.06167	9.85743	9.43431
COBS01471	7.12553	8.41631	9.24815	7.9158	7.29056	7.15299	8.65375	9.48149	9.55331	8.7275	7.69166	10.5515	9.07296	9.31939	8.76454	8.59686	8.38732	8.86224	9.78934	9.4929	9.55628	9.06757	8.25435	10.6319
COBS01472	5.44388	6.89925	5.36619	5.91746	5.72933	6.32226	5.77203	6.24542	5.97955	7.85913	7.4357	6.65879	6.50015	5.06398	4.53523	5.23529	5.84555	4.74829	5.69245	5.52611	6.49424	4.00157	7.05852	6.64847
COBS01474	8.34335	9.53502	8.78264	10.8956	9.88242	10.0096	10.8842	10.0139	10.222	9.73161	9.95182	10.2235	9.62017	9.07376	8.67334	10.9247	10.5378	10.9902	11.4918	11.5024	9.97753	8.55094	10.2264	11.5758
COBS01475	4.62807	5.0626	4.65157	5.77751	4.95404	5.48699	6.92356	7.64632	7.67455	6.87102	5.77192	7.37002	4.96909	4.87534	4.65334	6.14646	6.1649	5.66905	7.77305	8.00557	7.49529	4.75941	6.25947	7.75418
COBS01476	6.34041	7.54667	6.06116	12.1216	10.2392	14.6259	7.99398	8.32764	8.2415	10.2793	10.3542	7.96678	7.16908	6.04452	5.98779	12.0369	12.706	13.5366	7.86531	7.6624	7.77418	5.28644	8.1959	8.39764
COBS01477	9.18706	9.22931	9.33202	9.14693	8.63469	8.25587	8.49327	9.25209	8.50145	9.66161	9.44296	9.15821	9.44543	9.25287	9.31473	9.50223	9.48013	9.55505	9.32521	9.10782	9.23101	8.877	10.3355	9.75104
COBS01478	9.54028	10.134	10.9678	9.50373	9.08875	9.99349	9.1256	9.39943	9.25691	9.68826	9.70144	10.2014	10.5	10.3009	10.5984	10.2226	10.0766	10.1267	9.66891	9.47072	9.54234	9.91871	10.1863	10.2837
COBS01479	8.08997	9.07715	8.64621	11.1043	12.1168	9.97463	9.61215	8.90557	8.51834	10.1339	10.0209	9.51875	8.64675	8.5157	8.55908	13.1234	11.9211	12.673	10.6434	10.9415	8.28176	4.00157	10.4388	10.0267
COBS01480	11.538	11.1172	10.3127	11.3506	12.4256	11.9867	13.2645	13.1389	12.9281	12.9518	13.1881	13.1831	11.8037	10.2922	11.3862	12.2548	12.1482	12.1778	12.7582	12.5059	13.197	14.2399	12.5092	12.7187
COBS01481	6.86759	6.42078	6.66028	6.31294	6.99124	7.89703	7.50916	7.82956	8.1194	7.28703	7.05798	7.78232	7.02535	7.4715	6.43817	6.56023	6.51995	6.4939	6.89724	6.79862	7.59962	4.00157	6.75224	6.90287
COBS01482	10.9448	10.4848	10.9454	9.36202	9.18167	10.1807	9.12206	9.97019	9.52439	10.4237	9.90236	9.84293	11.2952	11.0313	11.3326	10.0858	9.87948	10.0304	10.0094	9.65196	10.0126	9.97166	10.8644	9.90514
COBS01483	5.07063	5.18159	5.27122	5.72706	5.41113	4.00157	4.72355	4.00157	5.29847	4.00157	4.00157	4.48445	4.96909	5.63152	5.27454	5.33594	5.30095	5.7434	5.17993	5.31083	4.81027	4.00157	5.11005	5.60759
COBS01484	11.4131	10.7761	10.5771	10.8412	11.6163	11.9992	10.9692	11.2549	11.3459	11.2329	11.0533	11.0896	10.9064	10.9002	10.9435	10.9815	11.044	11.0415	10.6899	10.6893	11.1556	11.3793	10.5067	10.2083
COBS01485	11.3692	11.7563	11.2266	13.2788	13.4673	12.997	13.2351	12.6448	12.8739	12.4082	12.5822	12.6724	10.8302	11.0113	11.3264	12.9103	12.908	12.8593	12.5281	12.7782	12.5846	13.2351	12.3875	12.3648
COBS01487	17.4732	17.9864	18.4682	9.86988	7.27116	9.5862	9.74437	10.1338	8.80296	9.38939	9.35208	10.7775	17.5185	17.9998	18.9524	8.02002	8.50896	9.1294	10.8251	10.4053	9.88121	8.56826	11.1902	11.5853
COBS01488	4.72315	5.51326	4.75006	7.6061	7.20111	5.72158	6.72889	5.92029	5.84223	5.3522	5.93575	5.89273	4.75649	4.62407	5.05165	5.35964	5.72335	5.7434	4.95071	5.65793	4.81027	4.00157	5.67813	6.0014
COBS01489	4.72315	5.62952	5.22022	7.54055	6.60969	6.4487	5.77203	4.98335	5.54771	5.42	4.87603	5.84437	5.21259	5.06398	5.22342	5.84695	6.0589	6.00246	5.72372	6.22686	5.7592	4.00157	5.88802	5.74147
COBS01490	5.01193	5.33666	5.49449	6.98994	5.63268	4.00157	4.92743	5.36559	4.89811	4.00157	6.53884	4.00157	4.44071	4.97491	5.22342	5.76759	6.00884	5.82696	5.52226	5.49782	5.52672	4.00157	6.29305	5.75943
COBS01491	4.62807	6.25251	6.03564	8.17452	6.94275	4.00157	6.28338	5.32512	6.12683	5.48382	6.08065	6.24299	5.46512	5.77065	5.96058	6.89796	6.97961	6.70268	6.77841	7.01899	6.29195	4.00157	7.049	7.07211
COBS01492	4.36517	5.83242	5.41066	7.33909	6.64073	4.00157	5.45763	4.98335	5.29847	5.6015	5.0648	5.53709	5.40739	5.28919	4.98643	6.317	6.3542	5.91778	6.47065	6.71297	5.23313	4.00157	6.30131	6.27771
COBS01493	10.4766	8.92057	8.66595	8.16589	9.4051	10.6377	9.40102	10.0366	10.0472	9.94061	9.77823	9.97606	9.0487	9.10189	9.08061	8.70854	8.62111	8.66988	8.66943	8.58948	9.86691	10.3321	8.79791	8.4914
COBS01494	10.2794	9.40118	9.00654	6.56416	5.75988	4.33945	9.2952	9.47759	8.8833	9.26505	9.57512	9.64656	10.1048	10.4829	10.4746	6.58669	6.27339	7.24541	9.50932	8.9655	10.065	9.809	9.87677	10.3034
COBS01495	10.4228	9.34446	9.31962	4.87236	4.95404	4.00157	4.83244	5.51384	5.65422	5.42	4.62456	4.83041	11.2762	11.5558	10.6718	4.71169	4.58682	4.25294	4.00157	4.89054	5.32561	4.00157	5.11005	4.4872
COBS01499	4.88089	5.18159	4.00157	4.80946	5.23364	4.00157	6.02119	5.73421	6.19462	5.11707	6.84219	5.74155	5.05767	5.06398	5.22342	5.12336	4.89988	5.29015	5.22942	5.75368	6.3877	4.44244	5.38833	5.91017
COBS01500	7.26799	7.31787	6.66028	6.60404	7.58512	7.62603	8.44311	8.85236	8.83698	8.26645	8.46296	8.64707	7.86317	6.95246	8.04343	7.73455	7.67958	7.7523	8.25411	8.75868	8.47049	8.33171	8.0806	8.85567
COBS01501	19.2009	18.0732	18.3526	10.9968	6.93035	10.5605	13.4178	11.671	9.57764	11.9078	11.9712	9.97865	19.2607	19.6015	19.1424	8.78092	8.92101	9.67438	11.8429	12.0677	10.5568	10.11	12.2815	11.923
COBS01503	11.1509	10	10.9976	8.97019	8.8246	9.07189	11.6991	11.2069	10.1276	11.0163	11.0859	9.99667	10.8584	11.3461	10.2074	11.8686	12.1014	11.8103	11.5107	11.2253	12.0151	10.0981	12.1022	11.3943
COBS01504	17.0441	16.073	16.6177	5.59073	4.63148	6.61861	5.81083	6.3733	5.78275	5.11707	6.38488	4.75988	18.0817	17.3567	17.6754	4.84678	4.96936	5.17595	5.94859	5.6826	6.21005	4.44244	6.36563	6.15341
COBS01507	7.38852	7.10618	6.61103	8.20012	10.4576	9.26445	9.25383	9.27697	9.57563	8.61457	8.11282	9.22747	7.12279	6.91612	6.84741	7.89133	8.05943	7.50584	7.71042	8.3602	8.51608	10.5127	6.55567	7.00407
COBS01508	9.9365	10.1427	9.31962	11.0958	11.9721	10.4067	11.7566	10.9444	11.0945	10.4516	10.9987	10.9043	9.63925	9.71229	9.76985	10.6473	10.8033	10.513	10.7157	11.0254	11.0777	12.0242	9.79987	10.6686
COBS01509	5.94541	6.13532	5.27122	6.78766	6.87966	4.00157	7.9862	6.26446	5.87093	5.65612	6.76212	5.98417	6.57203	5.77065	5.84548	6.5513	6.15354	5.94256	8.28301	6.45877	5.66513	4.00157	5.67813	6.39134
COBS01511	6.80166	6.08533	5.36619	5.08422	5.59862	6.5221	5.16141	5.73421	5.89898	5.6015	6.01026	5.98417	7.3269	6.35586	5.61361	4.96131	4.89988	5.26832	5.07255	4.70844	5.1312	9.70858	5.31627	5.06816
COBS01512	5.27434	7.10618	6.29209	8.14847	7.86161	5.34843	7.81226	6.87697	6.83139	6.51219	6.38488	5.91622	5.99807	6.41021	6.29738	6.89796	6.91609	6.40221	6.97116	7.58143	6.57703	4.44244	6.64155	7.08533
COBS01513	4.36517	5.42853	4.53377	4.66402	5.18399	4.00157	4.72355	4.00157	4.00157	4.46639	4.00157	4.89485	4.75649	4.00157	4.7521	4.27229	4.26473	4.43587	4.88249	4.45129	4.00157	4.00157	4.33579	4.56146
COBS01514	4.36517	4.84726	4.00157	4.47203	4.63148	4.00157	4.00157	4.00157	4.00157	5.6015	5.93575	4.00157	4.00157	4.44343	4.00157	4.00157	4.26473	4.00157	4.36585	4.00157	6.09992	4.00157	4.23816	4.4872
COBS01517	4.36517	5.73525	5.53415	6.42212	6.79996	4.00157	6.47948	6.08225	5.95326	5.02391	6.01026	6.06946	5.57231	5.41553	5.64962	5.9359	5.77063	5.45011	5.72372	6.21093	6.40605	4.00157	5.63697	5.62767
COBS01520	5.01193	5.55334	5.04887	5.98196	4.63148	4.00157	5.50816	4.49951	4.52469	4.46639	4.00157	4.59162	5.40739	4.7611	4.8384	4.27229	4.93536	4.70643	4.51538	4.45129	4.367	4.00157	4.77775	4.95972
COBS01522	7.20869	7.19922	7.38526	6.76455	6.75833	6.83949	7.16557	7.29116	6.83139	6.89193	6.5865	7.6642	8.03822	8.05414	7.62199	7.29565	7.19236	7.30507	7.26266	6.93686	7.32754	4.00157	6.60258	7.34861
COBS01523	9.50007	8.36755	8.8771	8.41925	8.92635	9.45984	9.49141	9.795	9.56552	10.121	9.52251	9.98382	8.99468	8.84082	8.71966	9.01843	8.75225	8.89367	9.16403	9.17207	9.65391	9.85905	9.22103	9.23951
COBS01524	7.16773	7.53783	7.74019	10.2158	11.7384	8.68891	8.8841	4.92207	6.25908	5.54418	5.77192	4.48445	8.28717	7.80222	7.21829	12.8332	12.2238	12.2928	10.4892	10.4959	4.72674	4.62267	5.76899	5.95661
COBS01525	6.78809	8.09533	8.26617	6.34505	4.72705	6.33873	6.05308	5.04052	4.37248	8.38728	9.15874	5.53709	7.70584	8.21031	8.23132	5.75108	5.81613	6.16698	6.81916	6.45877	5.1312	7.29487	8.45628	7.18685
COBS01527	11.0564	10.5549	10.6312	11.3038	11.8141	11.6697	11.4856	11.0655	11.0796	11.2997	11.4108	11.0985	10.6007	10.5368	10.6199	10.5571	10.5425	10.5463	10.3486	10.369	11.1569	12.2234	10.7669	10.5461
COBS01528	5.72083	7.77403	8.1863	8.43728	6.70078	4.00157	6.56778	5.94473	5.2506	5.54418	5.68094	5.20339	7.72648	7.67899	7.93609	7.74607	7.98195	8.18971	7.47923	7.69574	5.72866	4.00157	7.69011	7.66965
COBS01529	9.11432	9.50609	9.53439	9.37888	8.97762	9.26652	8.26844	8.16232	7.61272	9.37852	9.10408	8.55264	9.48513	9.26002	9.5095	9.61168	9.5863	9.82936	8.33452	8.20348	7.93583	10.0701	9.98955	8.92808
COBS01530	4.94899	5.28755	5.10952	5.87255	6.33192	4.00157	6.11458	5.86992	6.0053	5.6015	5.93575	5.20339	4.00157	5.06398	5.22342	6.27364	6.34436	5.66905	6.60217	6.47202	6.54451	4.00157	5.01317	5.82871
COBS01531	4.51443	5.12398	4.9838	5.82595	6.12349	5.38476	4.92743	4.35454	5.92641	5.3522	5.22066	4.89485	5.13829	4.00157	4.8384	5.51245	5.09339	5.31152	5.01375	4.99172	5.69732	4.00157	5.03839	4.92028
COBS01532	8.61628	9.05887	8.70463	10.4251	10.7242	9.89259	11.3927	11.0213	11.7337	9.20887	9.45549	10.364	11.1452	8.71111	9.07171	10.7892	10.8584	9.92364	12.5623	12.0181	11.1152	7.92796	8.08751	9.86884
COBS01533	7.84779	9.18223	9.37099	9.70435	8.52537	9.19441	5.55651	5.6448	5.4302	6.45636	7.02425	6.56264	8.7756	8.96856	9.54848	8.83918	8.59937	9.40743	5.32166	6.00278	5.1312	4.00157	7.51259	6.52598
COBS01534	6.82841	5.73525	5.41066	5.36762	5.01729	5.27175	4.00157	5.14499	4.37248	6.33722	4.87603	5.11173	5.9239	6.11301	5.71851	4.60343	4.37323	4.92735	4.36585	4.55127	5.01687	6.32345	5.15492	5.03348
COBS01535	7.30618	7.8824	7.64748	7.76933	6.46052	6.08697	6.05308	5.47861	5.97955	7.60791	7.75416	6.48956	8.15676	7.70028	8.06756	6.46813	6.11886	6.97205	6.18286	6.1948	6.54451	9.88459	7.4953	9.98905
COBS01536	9.73127	10.5208	10.5698	9.83229	9.39848	9.87099	8.59374	8.72656	8.96249	9.58173	9.4985	9.23617	10.6173	10.5515	10.6511	9.99996	9.99206	10.0755	9.63204	9.24109	8.85279	10.3422	10.0659	9.51845
COBS01537	10.4239	10.5775	11.1012	9.16649	9.66066	9.23304	10.7771	11.0771	10.5143	10.1764	10.0746	11.0258	9.70796	9.99096	11.8314	9.70462	9.67767	9.49293	10.7904	10.9369	10.9297	9.41866	10.4084	11.1228
COBS01538	9.69254	8.72564	8.96255	8.4301	9.42695	10.7871	9.05323	9.84726	9.88277	9.70865	9.31818	9.76095	9.31253	9.24928	9.00162	9.14502	9.11583	9.19211	8.92267	8.79995	9.7999	9.25379	8.82154	8.86327
COBS01539	7.16773	7.27587	7.82723	7.29989	7.06097	6.67085	6.82078	6.66934	6.55843	7.10334	7.15456	7.20082	7.80618	7.50825	7.44838	7.10485	7.29523	7.42148	6.76455	6.65659	6.31166	4.44244	6.93466	6.68406
COBS01540	12.0234	10.8541	10.7159	10.4474	10.3936	10.912	10.622	10.8934	10.7123	11.0233	10.9619	10.6845	11.5852	11.5295	11.3345	10.2749	9.94902	10.3371	9.9082	10.0588	10.3835	11.2744	10.8876	10.4498
COBS01541	13.7894	12.9795	13.6848	12.8526	13.1812	13.5181	13.4362	13.518	13.793	12.6719	12.5672	13.2796	13.4828	13.9721	13.4474	13.1023	13.1698	12.8782	13.2663	13.3196	13.3807	13.8768	12.1965	12.9718
COBS01542	6.93054	5.23597	5.27122	5.03593	5.63268	4.00157	5.34902	6.12499	6.68647	4.00157	5.47464	6.53388	5.80368	5.85523	5.96058	4.80452	5.06397	4.95872	5.27658	5.60699	5.1835	4.00157	4.90414	5.30754
COBS01543	14.0647	13.1465	14.4267	10.9586	10.4828	11.072	13.4694	13.9203	13.8173	13.1276	13.2483	15.3013	13.2633	14.6978	14.1728	11.0311	10.905	10.8948	12.915	12.8757	13.8716	13.6673	12.7464	15.0869
COBS01544	9.6818	9.59755	8.44147	8.57066	8.05427	8.25169	9.05323	9.54431	9.59761	9.51382	8.9881	9.55396	9.48814	8.65794	8.73101	8.22	8.55693	8.27416	8.93181	8.85238	9.55231	8.49768	8.59991	8.98315
COBS01545	10.2397	10.5946	10.4979	10.6038	10.747	10.6488	11.0853	11.7316	10.9184	13.9843	14.5069	10.2655	10.1223	10.5086	10.7694	11.5529	12.0375	11.1289	12.3118	12.1086	10.8243	8.63554	9.03509	10.4037
COBS01546	4.80628	6.00651	6.13483	6.1019	5.92872	4.33945	7.12326	7.05757	6.99965	5.85257	6.53884	7.03908	5.80368	6.00886	6.23217	6.10952	6.25239	5.79974	7.31999	7.34919	7.40948	4.00157	5.97567	7.39161
COBS01547	9.06829	6.20688	6.24904	6.74104	7.45408	7.36307	8.41447	8.43622	8.30617	7.92061	6.84219	8.26831	6.76746	6.35586	6.18683	6.74332	6.53717	6.21749	8.36636	8.37394	8.92518	8.04005	5.42262	6.01599
COBS01548	12.0571	9.35199	8.47321	5.25583	5.41113	6.35501	7.52001	7.73433	6.0053	8.34315	8.42518	6.95599	11.1134	11.6895	9.53128	5.28685	5.17648	5.8667	5.86898	6.03989	7.7112	6.69236	7.35266	7.07874
COBS01550	11.8428	10.8733	10.9984	10.5494	11.2207	11.5951	10.7625	10.9345	11.0704	11.7297	11.5177	11.2343	11.0073	10.9954	10.8855	10.8071	10.8345	10.8123	10.413	10.3193	11.1379	11.749	11.176	10.5259
COBS01551	5.31935	4.99675	4.00157	5.08422	4.51723	4.00157	5.60289	4.35454	4.96746	5.02391	4.00157	5.11173	4.44071	4.00157	4.37999	4.54066	4.52574	4.82511	4.51538	4.32021	4.72674	4.00157	5.06291	4.68519
COBS01553	7.46633	8.04654	7.14517	9.89223	10.5431	7.63895	10.2826	9.76014	9.7869	7.54406	8.29156	8.94127	7.44408	7.27192	6.95631	9.41282	9.99584	9.13316	9.96415	10.3638	9.64463	8.07285	8.03127	9.14611
COBS01555	6.99076	5.66582	5.95586	4.66402	5.59862	4.75039	5.45763	5.04052	4.73743	4.65614	4.62456	4.75988	6.03359	5.77065	5.90435	4.27229	4.26473	4.86071	4.36585	4.00157	4.72674	4.44244	4.23816	4.00157
COBS01556	9.92743	10.4039	10.3583	10.5902	10.3588	9.73113	9.93758	10.2377	10.3214	9.86477	9.65875	10.0654	10.2394	10.0784	10.3551	10.7702	10.6884	10.6405	10.3811	10.2734	10.353	8.9624	10.1637	9.82481
COBS01557	5.22726	4.76009	4.83614	5.53139	5.41113	4.00157	4.00157	5.28301	4.82212	5.11707	6.01026	5.40143	4.62026	4.00157	5.05165	5.09319	5.4329	5.43137	5.22942	5.27619	5.45065	8.01496	4.87445	5.38445
COBS01558	4.00157	5.12398	5.22022	5.93933	5.92872	4.00157	6.28338	5.54801	5.72021	5.70832	5.35526	5.53709	5.21259	5.06398	4.7521	5.61009	5.64015	5.37313	5.72372	5.98381	5.97953	4.00157	5.27829	5.68593
COBS01559	4.51443	5.55334	4.9838	5.75255	5.52733	4.00157	5.16141	5.40459	5.5099	6.022	5.68094	5.20339	5.05767	4.87534	5.05165	5.31168	5.72335	5.4123	5.94859	6.12822	5.7592	4.62267	4.98721	5.4089
COBS01560	4.72315	4.76009	4.37895	5.13009	5.18399	4.00157	5.81083	4.85579	4.00157	5.11707	5.68094	5.40143	4.62026	4.44343	4.37999	4.88682	4.96936	4.82511	4.62923	4.70844	6.02905	4.62267	4.93277	5.03348
COBS01561	4.36517	4.66032	4.00157	4.57651	5.01729	4.00157	5.16141	5.28301	4.82212	4.46639	4.87603	4.83041	4.00157	4.44343	4.37999	4.54066	4.78259	4.43587	4.80775	4.45129	4.00157	4.00157	4.77775	4.73885
COBS01562	4.00157	4.00157	4.37895	4.93054	4.81061	4.00157	5.64749	7.73433	6.43557	10.0968	9.70144	5.43694	4.00157	4.44343	4.00157	4.54066	4.93536	5.01816	4.51538	4.7744	5.32561	4.00157	4.93277	5.22446
COBS01563	4.62807	4.66032	4.37895	4.80946	5.23364	6.4637	5.29025	5.6448	5.58432	4.65614	5.35526	5.68666	4.44071	4.00157	4.37999	4.92491	5.12191	4.70643	5.01375	4.7744	5.87424	4.00157	5.03839	5.03348
COBS01564	4.00157	4.54097	4.37895	4.93054	5.32615	4.00157	5.50816	5.89536	5.09127	4.00157	4.00157	4.68136	4.44071	4.00157	4.37999	4.46911	4.52574	4.86071	4.51538	4.94267	5.36893	4.00157	4.90414	4.73885
COBS01565	5.5557	4.99675	4.37895	5.77751	5.98027	5.38476	7.28536	5.73421	5.29847	5.85257	6.2109	5.47133	4.96909	4.62407	4.53523	5.70015	5.4329	5.4123	6.0942	5.16451	6.18876	5.21712	5.50392	5.30754
COBS01566	4.00157	4.38409	4.00157	5.29445	5.36949	4.00157	4.92743	5.76259	5.14736	5.80636	5.22066	4.00157	4.00157	4.44343	4.53523	5.20849	5.41201	5.37313	4.88249	5.0822	5.07583	4.00157	4.87445	5.38445
COBS01567	5.5557	4.00157	4.65157	5.56144	5.41113	5.6672	5.84845	5.40459	5.78275	4.46639	6.2109	5.06232	4.00157	4.44343	4.37999	4.99619	5.36897	5.12628	5.07255	5.20316	5.56291	4.62267	4.98721	5.28059
COBS01568	4.00157	4.00157	4.53377	5.25583	5.41113	4.00157	5.64749	5.36559	4.00157	6.53927	5.93575	4.89485	4.75649	4.62407	4.37999	4.84678	5.20265	5.15144	5.32166	4.99172	5.97953	8.1517	5.15492	4.92028
COBS01569	4.36517	4.84726	4.75006	5.4024	5.63268	4.00157	5.60289	4.98335	5.29847	5.98173	4.62456	5.74155	4.96909	4.00157	4.00157	5.15258	5.53182	5.12628	5.36487	5.27619	5.32561	4.00157	5.17658	5.4562
COBS01570	5.01193	4.66032	4.00157	5.70102	5.45123	4.00157	6.36032	6.26446	5.75188	5.54418	4.87603	6.00603	4.44071	4.62407	4.37999	5.18094	5.47353	5.37313	5.22942	5.70676	5.90141	4.00157	5.21852	5.75943
COBS01571	4.00157	4.38409	4.00157	5.53139	5.56353	6.18252	5.84845	5.51384	4.82212	4.65614	4.00157	5.59925	4.00157	4.00157	4.00157	4.88682	4.89988	4.70643	4.95071	5.27619	5.78899	4.75941	4.96043	5.03348
COBS01572	4.88089	5.18159	4.37895	5.46877	5.23364	4.6728	5.22791	5.6448	5.09127	5.02391	5.85654	4.68136	4.00157	4.44343	4.00157	4.99619	5.22814	4.82511	5.17993	5.0822	5.07583	4.00157	4.81141	4.87883
COBS01573	4.51443	4.38409	4.00157	5.25583	5.56353	4.00157	5.88495	5.47861	5.72021	5.85257	5.93575	4.75988	4.44071	4.62407	4.37999	4.75966	5.34678	5.12628	4.62923	4.89054	6.52796	4.00157	4.77775	4.92028
COBS01574	4.72315	4.54097	4.00157	5.21568	5.90213	4.00157	5.29025	5.89536	5.87093	5.02391	5.22066	5.11173	4.75649	4.44343	4.53523	4.88682	4.86276	4.92735	4.00157	5.0822	5.69732	4.44244	5.08678	5.16497
COBS01575	4.00157	4.00157	4.37895	5.50051	5.32615	4.6728	5.92042	5.6448	4.96746	5.42	5.35526	4.75988	4.00157	4.00157	4.37999	4.60343	5.03355	4.82511	5.22942	4.63505	5.59799	4.00157	5.06291	5.03348
COBS01576	4.00157	4.38409	4.00157	5.17383	5.13166	4.33945	5.16141	6.18659	6.34042	5.65612	5.93575	5.59925	4.00157	4.00157	4.00157	4.65994	5.06397	4.89473	4.36585	4.70844	5.36893	4.44244	4.98721	4.95972
COBS01577	4.62807	4.00157	4.00157	5.87255	5.78968	5.96209	6.22949	5.54801	5.65422	5.3522	5.22066	5.62912	4.62026	4.44343	4.37999	5.06201	5.22814	4.82511	4.88249	5.31083	5.72866	4.00157	5.42262	5.4089
COBS01578	4.36517	4.00157	4.37895	5.64717	5.56353	4.00157	6.22949	6.44123	5.2506	4.00157	5.0648	5.89273	4.00157	4.00157	4.37999	4.92491	5.253	4.98896	4.80775	5.20316	6.07673	4.00157	5.37077	5.3338
COBS01579	5.5557	4.38409	4.00157	5.46877	4.81061	4.00157	5.45763	5.79032	5.03153	5.42	7.02425	4.75988	4.75649	4.00157	4.37999	4.65994	5.56907	5.12628	5.01375	5.60699	5.81807	4.44244	5.69154	7.40741
COBS01580	5.97084	4.84726	4.53377	5.72706	5.45123	4.33945	6.11458	7.20804	5.61979	11.9072	12.6147	5.50469	5.46512	4.00157	4.7521	4.75966	5.41201	5.35299	4.88249	6.47202	7.94801	11.065	5.29745	9.35037
COBS01581	5.89297	4.99675	4.00157	5.36762	4.63148	4.00157	5.55651	5.28301	4.00157	4.65614	4.62456	5.40143	5.76085	4.44343	5.22342	4.27229	5.09339	4.86071	4.72447	4.7744	5.59799	4.44244	4.90414	5.06816
COBS01582	6.44954	5.28755	4.53377	5.36762	5.01729	4.00157	5.40469	6.2261	5.38807	4.00157	4.00157	5.06232	6.42424	5.21973	5.57645	5.02971	5.06397	4.74829	4.51538	4.99172	5.1312	4.44244	5.23884	5.22446
COBS01583	7.49135	5.80089	4.75006	5.21568	5.41113	4.00157	5.77203	5.70514	5.38807	4.79992	5.58241	5.43694	7.68489	6.14594	6.16356	4.65994	4.93536	4.61349	4.80775	4.94267	5.23313	4.00157	5.03839	5.06816
COBS01584	4.80628	4.00157	4.00157	5.6744	5.52733	4.00157	4.42128	5.44222	5.61979	5.02391	4.00157	5.11173	4.00157	4.44343	4.37999	4.88682	5.09339	4.43587	4.62923	5.0822	5.66513	4.00157	5.03839	5.1338
COBS01585	4.00157	4.00157	4.00157	4.74063	5.01729	4.33945	6.05308	5.44222	5.29847	5.20178	4.87603	5.47133	4.00157	4.00157	4.00157	4.38387	4.96936	4.56086	4.62923	4.63505	4.367	4.00157	4.70516	4.78856
COBS01586	4.80628	4.00157	4.00157	5.82595	5.18399	4.33945	6.67067	5.94473	4.64053	6.71512	6.01026	5.36471	7.22853	4.00157	4.00157	5.9359	5.09339	4.78773	7.33859	5.03811	5.63204	5.21712	4.90414	4.99739
COBS01588	4.88089	4.76009	4.53377	5.56144	4.95404	4.00157	5.08996	5.6448	5.14736	5.02391	5.93575	5.50469	5.05767	4.00157	4.00157	4.92491	5.27726	4.61349	4.72447	5.20316	5.59799	4.44244	4.62342	7.01102
COBS01590	4.00157	4.38409	4.00157	4.47203	4.81061	4.00157	6.05308	5.89536	4.00157	5.11707	4.62456	4.95444	4.00157	4.00157	4.37999	4.27229	4.26473	4.50244	4.36585	4.7744	4.51701	4.44244	4.33579	4.78856
COBS01592	5.62457	8.549	5.16646	5.03593	4.88559	4.00157	6.5021	7.07859	5.72021	6.36801	6.32938	6.12991	7.22853	6.35586	4.9158	4.99619	4.96936	4.50244	5.44638	5.55371	6.52796	5.96828	5.89932	6.19195
COBS01593	8.71102	8.06503	8.01799	6.81039	5.66578	6.00509	8.80694	8.40778	7.88514	8.49201	8.51183	8.35087	8.65749	7.9952	8.54628	6.37951	6.40232	6.67473	8.30195	8.16048	9.09304	4.62267	8.49312	8.51331
COBS01595	10.8836	10.7573	11.4908	8.90955	6.68602	8.41017	12.059	11.6745	11.6846	10.1231	10.4605	11.4421	11.0425	12.2623	11.19	6.77414	6.94821	7.32736	10.8169	11.0576	11.8456	10.921	9.72675	11.6531
COBS01596	10.706	6.89925	6.48868	6.46632	7.52111	4.33945	6.9881	8.90557	7.96756	7.31801	6.2109	8.68572	6.59518	6.91612	6.87544	5.31168	5.34678	5.52206	6.88453	7.20931	7.88607	5.06167	7.05852	7.61641
COBS01597	10.9115	9.3369	9.28943	9.18366	9.53351	9.36835	10.5917	10.6012	9.94488	10.11	10.2574	10.2897	10.0811	10.1144	9.8741	9.10997	9.09763	9.08082	10.5771	10.2175	10.3078	10.9846	9.97352	9.62723
COBS01598	5.99576	7.48366	5.74719	6.19399	6.23182	4.33945	6.40926	5.61342	5.81285	5.89712	6.38488	5.79404	6.39795	6.35586	6.39943	5.66495	5.96996	5.46854	6.80571	7.16209	5.59799	4.00157	6.56924	6.68406
COBS01600	7.20869	7.9701	7.08709	8.94775	9.3189	7.70184	9.07897	8.0976	8.48437	7.5177	7.62629	7.61809	7.4932	6.91612	7.0203	8.54308	8.82044	8.31459	8.62503	8.7923	7.97205	4.62267	7.4953	7.9242
COBS01601	4.36517	4.92543	4.37895	5.84947	6.05388	4.00157	5.29025	4.78321	4.00157	4.46639	4.87603	4.59162	5.28168	4.00157	4.00157	5.20849	5.22814	4.95872	5.22942	5.63274	5.01687	4.00157	4.52828	4.83505
COBS01602	4.00157	5.42853	4.00157	6.28003	6.47792	4.00157	6.6507	5.6448	4.96746	5.02391	5.58241	5.24618	4.87008	4.87534	4.65334	5.20849	5.5506	5.24602	5.48497	6.1948	5.66513	4.00157	4.74242	5.43281
COBS01604	4.00157	5.38358	4.37895	5.93933	7.4281	4.00157	5.95491	6.77705	6.70167	5.3522	4.00157	6.24299	4.96909	4.00157	4.00157	4.92491	5.09339	4.35662	5.27658	5.0822	5.92799	4.00157	4.84358	5.43281
COBS01605	5.31935	4.38409	4.00157	4.74063	5.32615	4.75039	4.59308	5.79032	4.64053	5.02391	5.85654	4.95444	4.44071	4.00157	4.00157	4.27229	4.58682	4.35662	4.62923	5.0822	5.1312	4.87342	4.52828	4.4872
COBS01606	4.00157	5.62952	4.00157	6.66801	7.08346	5.45396	7.3355	5.40459	6.68647	5.42	5.77192	5.65824	4.96909	4.7611	4.65334	4.99619	5.34678	5.04643	5.27658	5.52611	5.78899	4.00157	5.06291	5.68593
COBS01607	5.01193	5.42853	4.53377	6.24629	6.52884	4.00157	6.5021	5.79032	5.92641	8.4371	6.72027	4.89485	5.21259	4.00157	4.37999	4.75966	5.12191	4.89473	5.17993	5.70676	5.7592	4.00157	4.93277	5.19517
COBS01608	4.94899	5.51326	4.37895	6.34505	7.66868	5.34843	6.93998	6.47395	7.35346	5.89712	5.0648	6.64546	4.96909	4.62407	4.00157	4.80452	5.17648	4.89473	5.07255	5.31083	6.31166	4.00157	4.96043	5.4562
COBS01609	5.59065	4.38409	4.00157	4.87236	5.01729	4.33945	4.92743	4.98335	4.37248	4.00157	5.85654	4.83041	4.00157	4.00157	4.00157	4.46911	4.00157	4.00157	4.36585	4.32021	4.367	4.00157	4.33579	4.4872
COBS01613	6.53418	4.54097	4.00157	5.75255	5.56353	5.41991	5.50816	5.99224	5.72021	5.42	5.22066	5.01005	4.00157	4.62407	4.37999	4.38387	5.17648	5.12628	4.88249	4.70844	6.23101	5.21712	4.62342	4.56146
COBS01614	5.62457	4.84726	4.75006	6.29659	5.66578	6.53631	6.14427	5.6448	5.38807	5.11707	4.62456	5.24618	4.62026	4.7611	4.8384	5.23529	5.12191	6.41081	6.04748	5.24034	5.90141	4.00157	4.74242	5.25292
COBS01616	5.17783	11.2064	5.49449	7.36968	7.76151	7.17992	9.11497	9.31895	10.3674	8.40169	8.1286	9.90695	9.94099	8.87383	4.37999	9.7007	8.77004	7.74573	10.8858	10.6651	9.34549	8.05655	4.77775	9.42151
COBS01617	7.50779	8.93401	9.3246	8.66545	8.04296	8.10168	7.32313	7.97541	7.29539	8.0269	6.91789	8.08258	9.2394	9.45949	9.49405	8.95236	9.13928	9.56994	8.80161	8.73493	7.77418	4.00157	8.91235	9.08896
COBS01618	11.3175	11.6921	11.4997	11.369	10.8206	11.1564	10.8779	10.539	10.6029	11.1211	11.1982	10.8628	11.5496	11.2153	11.6367	11.2009	11.2461	11.2525	10.9936	11.0416	10.5258	10.291	11.6721	11.2246
COBS01619	9.84638	9.34948	8.21342	9.01165	9.62897	10.417	11.6613	11.865	11.8568	10.9808	10.729	11.761	9.0157	8.87383	8.68117	8.82303	8.77004	8.31901	10.018	10.3894	11.8804	11.4124	10.0896	10.619
COBS01621	4.80628	4.00157	4.00157	4.66402	4.95404	6.6836	5.60289	4.49951	5.58432	4.00157	5.93575	4.68136	4.44071	4.00157	4.37999	4.00157	4.69219	4.25294	4.36585	4.00157	4.81027	4.00157	4.23816	4.62658
COBS01623	5.48241	4.00157	4.00157	4.33497	4.95404	4.47832	5.29025	4.70236	5.03153	5.11707	4.62456	4.83041	4.44071	4.00157	4.00157	4.27229	4.69219	4.00157	4.00157	4.00157	4.88522	4.00157	4.52828	4.28283
COBS01624	4.62807	5.76851	5.27122	6.46632	5.72933	4.00157	4.72355	5.6448	4.89811	4.00157	4.87603	4.83041	5.13829	4.97491	5.61361	5.09319	5.4933	5.22321	5.17993	5.27619	4.00157	4.00157	4.90414	4.99739
COBS01625	8.72506	10.0609	9.6137	10.958	10.42	10.3177	9.7142	8.55578	9.29411	7.91055	8.67088	8.48848	8.28022	8.69537	9.8775	9.48638	9.56914	9.29653	8.51982	8.7717	9.03734	6.37886	7.37556	8.38185
COBS01627	4.36517	5.89318	4.75006	5.25583	5.59862	6.14514	5.01248	5.09424	5.58432	5.11707	4.87603	4.68136	5.05767	4.44343	4.65334	4.84678	5.00205	4.56086	4.36585	4.45129	4.00157	4.62267	4.33579	5.25292
COBS01628	10.4389	9.72278	9.73813	9.15348	9.19956	10.0642	8.95733	9.88157	9.87298	10.1868	9.86059	9.84577	9.99063	9.97368	9.90946	9.68888	9.49196	9.51714	9.70664	9.59013	9.83787	5.28644	10.3389	9.53756
COBS01629	11.3946	9.58909	10.6121	9.25239	9.90283	11.014	9.91938	9.98673	10.1138	10.0813	9.27641	9.88639	10.3142	10.8118	10.4667	10.1901	9.94276	10.2873	9.82244	9.75384	9.95216	9.25379	9.61517	9.65154
COBS01630	7.41493	7.21042	7.98056	6.95989	6.94275	4.00157	7.01928	7.29116	7.2553	7.15586	6.38488	7.69624	7.6743	8.18794	7.73203	7.60557	7.49822	7.49409	7.87802	7.80156	7.85406	5.28644	7.29773	8.13394
COBS01631	5.31935	5.70104	5.68037	5.77751	5.95476	6.92737	6.02119	6.08225	6.03054	6.17154	6.43818	5.84437	5.71645	5.63152	5.61361	5.83148	5.86	5.6536	5.69245	6.1948	6.07673	4.00157	5.47212	5.64742
COBS01632	5.80992	5.59206	5.57248	5.91746	6.7154	6.61861	6.63044	5.67536	6.30037	5.54418	6.08065	6.5768	5.34641	5.52868	5.64962	5.71737	5.80115	5.52206	5.52226	6.00278	6.29195	4.00157	5.56497	5.66683
COBS01633	4.62807	4.66032	4.75006	4.57651	5.36949	4.33945	4.59308	5.28301	5.14736	4.00157	4.00157	4.68136	5.05767	4.00157	4.53523	4.27229	4.26473	4.25294	4.36585	4.55127	4.63121	4.00157	4.00157	4.39871
COBS01634	4.94899	5.92249	5.74719	7.3468	5.52733	7.33945	5.29025	5.58118	4.37248	6.59186	5.47464	5.47133	5.88511	4.97491	5.45709	5.51245	5.20265	7.73581	5.07255	5.55371	5.23313	4.00157	6.63514	5.98665
COBS01635	10.2506	10.3296	10.3002	10.7713	10.9256	10.9588	10.2842	10.6539	10.4717	11.0475	10.8737	10.5445	9.99275	9.93179	10.313	10.7948	10.68	10.8799	10.2016	10.2457	10.4133	10.8684	11.0216	10.2872
COBS01636	8.03457	9.14228	8.81835	7.56053	7.06097	8.01046	7.44223	7.44405	6.54154	7.12107	7.97994	6.60468	8.09476	8.71111	9.27911	7.74607	8.07099	7.75558	6.72213	8.51394	7.09358	4.44244	7.02493	9.23659
COBS01637	12.1651	12.2439	11.8769	12.5165	12.9661	12.5133	12.3827	12.6222	12.6285	12.7593	12.6478	12.3659	11.9051	11.7724	11.9461	12.1497	12.1221	11.876	12.0145	12.152	12.4623	13.0105	12.5515	12.0601
COBS01638	5.75126	7.10618	6.75379	7.6061	6.70078	4.00157	7.22007	5.92029	5.58432	5.70832	6.98969	5.96192	6.50015	6.65333	6.87544	6.59539	6.84953	6.81551	6.11694	7.04532	6.35022	4.00157	6.75224	6.89535
COBS01639	10.9191	9.85927	9.86466	9.67735	10.2806	10.6794	10.2762	9.95346	10.1535	10.7233	10.5421	10.2289	9.72081	9.89783	9.86212	9.90183	9.81929	9.86072	9.51945	9.57685	10.1877	10.263	10.0507	9.69366
COBS01640	8.08997	8.1769	8.70463	8.35239	7.97316	8.27248	7.46489	7.44405	7.79767	7.87992	7.15456	7.37797	8.77066	8.81191	8.66941	8.28178	8.14392	8.35175	7.68168	7.63973	7.59186	4.97278	8.15922	7.71676
COBS01641	9.76049	10.0222	9.89839	9.50714	9.32357	9.16363	9.20122	9.06994	9.04338	9.85173	9.51654	9.0758	10.059	9.70445	9.88429	9.47953	9.5873	9.55037	9.3504	9.24669	9.32703	4.44244	10.2613	9.33543
COBS01643	7.21875	7.70483	8.16423	7.26773	6.52884	7.03982	5.84845	5.92029	6.36	7.04878	7.4858	6.94524	8.55778	8.22503	7.98127	7.55839	7.54889	7.99321	7.40185	7.17007	6.5112	4.00157	7.61535	7.32105
COBS01644	10.0494	9.28804	9.50404	9.4029	9.49058	9.23937	8.99259	9.53496	9.41609	10.0835	9.91602	9.68993	9.56994	9.38625	9.47844	9.13052	9.16505	9.21598	8.68753	9.00794	9.23844	9.71377	9.75803	9.33952
COBS01645	5.94541	4.76009	4.65157	4.74063	5.72933	4.00157	4.92743	6.47395	6.19462	5.70832	6.1474	6.12991	4.00157	4.44343	4.53523	4.80452	4.78259	4.66171	4.88249	5.12426	5.32561	4.00157	4.84358	4.83505
COBS01646	8.92066	9.70722	9.66359	10.7571	10.7154	9.74752	11.8944	10.5049	11.0704	9.32668	10.4164	10.3094	9.23582	9.3632	9.66341	10.1222	10.2714	10.0491	10.7979	11.2073	10.6413	10.6784	9.916	10.4134
COBS01647	8.43166	9.2563	9.28943	9.96103	9.73785	8.87149	10.4525	10.0693	10.6167	9.25716	9.43032	9.65469	9.2394	9.09391	9.34948	10.057	10.0049	9.6351	10.5762	10.8965	9.84275	8.59104	9.63412	9.84986
COBS01648	8.43166	9.98233	10.9356	9.08887	8.04296	8.11556	10.1945	9.80592	9.13918	9.00245	9.68558	10.7535	11.6704	11.9167	10.8617	10.0501	9.91826	10.1204	11.0338	11.1797	10.0241	7.89163	9.80406	12.1104
COBS01649	7.50779	8.13086	8.00562	8.16156	7.74062	7.29099	6.82078	7.48374	7.59683	7.01119	6.98969	7.84649	7.75689	8.19543	8.25775	8.6199	8.80499	8.51864	8.46627	8.41773	7.87972	4.00157	8.34164	7.97432
COBS01650	11.3076	10.5208	11.1091	7.50661	6.29278	4.00157	7.09433	8.44023	7.71923	9.77369	11.0136	8.14874	11.6301	12.2462	11.9149	6.48706	6.72103	6.78978	9.75545	8.65564	8.60314	4.00157	8.17227	9.50517
COBS01652	6.37778	7.53783	6.13483	7.8032	6.91785	5.96209	6.38502	6.55245	6.34042	6.022	6.27146	6.04866	6.90237	5.93439	6.18683	5.95013	6.04657	6.73683	5.59336	5.75368	6.09992	4.44244	6.31768	6.12707
COBS01653	4.80628	4.76009	4.53377	5.70102	5.84718	4.00157	7.43076	7.36116	6.95001	6.6425	6.38488	6.92351	4.96909	4.7611	4.7521	5.15258	5.34678	4.92735	6.30554	6.63338	7.34616	4.00157	5.98621	6.69281
COBS01654	6.71815	6.98048	6.15848	8.44443	9.48851	8.27248	10.8977	11.1227	11.2157	9.55945	9.9781	10.9519	6.31585	6.17805	6.6661	8.14968	8.79459	7.90756	10.0266	10.3716	10.9637	10.3253	9.15258	10.4321
COBS01655	4.88089	4.99675	5.16646	5.08422	5.84718	5.82348	5.34902	6.1038	6.55843	6.17154	5.77192	5.79404	5.05767	4.87534	5.11245	5.12336	5.36897	5.17595	4.95071	5.34434	6.45965	4.00157	5.11005	4.83505
COBS01656	6.34041	6.05959	5.68037	6.29659	6.78622	7.52522	6.58899	6.30174	6.67111	6.53927	5.35526	6.29608	5.71645	6.11301	6.20969	6.32763	6.37366	6.41081	6.52147	6.4454	6.40605	4.00157	5.75642	5.77712
COBS01657	4.51443	6.36013	5.10952	6.15793	5.63268	4.33945	5.16141	5.19318	4.96746	5.65612	6.2109	5.81946	6.37114	5.72605	5.71851	5.55251	6.00884	5.52206	5.22942	4.99172	4.367	4.00157	5.15492	5.28059
COBS01658	9.54424	9.00577	9.62985	9.3102	9.13729	9.31534	9.38637	9.32764	9.05788	9.13327	9.07188	9.18317	9.26419	9.77849	9.4444	9.55745	9.54765	9.75477	9.45123	9.31763	9.12546	8.877	9.35746	9.35845
COBS01659	8.63871	9.24017	8.88048	11.0527	9.7809	11.1322	7.74923	7.80478	8.30617	8.60215	8.23442	8.76003	8.69447	8.35112	8.91805	10.4786	10.6126	10.9435	8.65846	8.81513	7.31813	4.00157	9.54683	8.8365
COBS01660	10.5325	10.7918	10.663	10.3135	10.2293	10.2628	10.3685	10.6012	10.7448	10.0968	9.98676	10.4355	10.8373	10.9397	10.6951	11.1111	11.1645	11.1283	11.4527	11.3503	10.5398	9.60063	10.7576	10.7999
COBS01661	5.97084	7.43688	6.33379	8.79407	8.42019	7.47561	9.27943	8.43622	9.20837	6.48456	6.84219	7.72759	6.64032	5.97217	6.68215	8.53208	9.09057	8.13303	10.2091	10.4674	8.1926	4.00157	7.32153	8.6091
COBS01662	5.07063	6.22989	5.36619	4.87236	4.95404	4.00157	5.40469	4.49951	5.5099	5.48382	4.00157	5.11173	6.06816	5.47355	5.64962	5.12336	4.82376	4.92735	5.17993	5.16451	5.45065	4.62267	5.35292	5.64742
COBS01663	5.72083	6.31812	5.92811	7.08569	6.60969	4.00157	7.83844	8.03515	8.2002	6.6425	7.18533	8.11131	6.45002	6.11301	6.49426	7.50507	7.75691	7.12306	8.81814	8.76651	8.1926	4.00157	7.85876	8.37388
COBS01664	9.52032	9.36692	8.4866	10.0963	10.7321	10.7275	12.2917	12.4555	12.6501	11.4637	11.6812	12.1793	9.00313	8.91972	9.18328	10.7366	10.8839	10.3662	12.166	12.1961	12.518	12.3446	11.0722	11.8239
COBS01665	4.36517	5.18159	5.22022	6.48074	4.63148	6.25424	5.22791	5.54801	4.73743	5.48382	4.62456	5.62912	4.96909	5.41553	5.53805	4.88682	4.82376	6.30381	5.66034	5.24034	5.1312	4.00157	5.81799	6.1137
COBS01666	7.21875	7.39831	7.22266	9.6107	9.96238	9.06477	9.44974	8.42004	9.07223	6.992	7.02425	8.48117	6.93863	7.13707	7.58053	9.6012	9.48981	9.37388	9.71548	9.33527	8.48724	4.62267	6.75813	7.76236
COBS01667	4.00157	5.12398	4.65157	4.57651	5.28094	4.00157	4.00157	4.92207	4.89811	4.46639	5.0648	4.34381	4.75649	4.62407	4.65334	4.00157	4.26473	4.00157	4.51538	4.63505	4.00157	4.44244	4.57792	4.39871
COBS01668	4.80628	5.0626	4.00157	6.91879	6.7154	4.6728	6.5021	5.19318	4.89811	4.65614	4.00157	4.48445	4.87008	4.87534	4.98643	7.24216	6.60396	6.43628	8.13233	7.51441	5.23313	4.00157	4.93277	5.35943
COBS01669	6.56662	7.24353	7.64748	11.7819	9.81775	11.3902	6.89014	5.86992	6.0553	5.75833	5.93575	6.84464	6.28732	6.801	7.54647	11.6317	11.1401	11.7339	7.34781	7.63973	5.84648	4.44244	5.63697	7.38098
COBS01671	6.43195	6.51615	5.53415	7.98622	9.03283	8.94575	9.38342	8.38296	9.2719	8.24261	8.39943	9.50082	6.10181	5.85523	5.22342	9.5056	9.21524	8.48756	9.8532	10.1935	8.56027	4.00157	7.5057	8.23712
COBS01672	9.91983	9.65748	8.76078	9.56723	9.7326	10.81	11.1033	11.647	12.3681	11.8188	12.4168	12.0512	9.31253	8.9988	8.89806	10.0307	10.236	9.90835	11.1498	11.6353	11.6321	11.2107	9.783	11.2759
COBS01673	6.78809	6.15961	5.71424	7.20963	8.71866	6.74566	7.47609	6.7509	7.85213	4.65614	5.35526	6.29608	5.71645	5.58125	5.4983	7.07447	7.43673	6.8282	6.7077	6.81924	7.05998	4.00157	5.25876	5.74147
COBS01674	8.68612	9.37187	8.2453	10.895	11.6039	9.71151	10.5981	9.86228	10.2638	8.92981	9.39173	9.23182	8.04644	8.01229	8.84682	10.4462	10.7785	10.2187	10.0782	10.4137	9.83298	8.36515	7.58301	9.16159
COBS01675	4.00157	4.99675	4.53377	5.77751	7.37468	4.00157	6.28338	6.08225	6.67111	4.91966	5.77192	5.11173	4.87008	4.44343	4.7521	5.35964	5.4329	4.98896	5.40639	5.63274	5.52672	4.00157	4.84358	5.3338
COBS01676	4.51443	5.0626	4.91335	5.43608	5.75988	4.00157	4.42128	5.14499	5.65422	5.11707	5.0648	4.68136	4.75649	4.62407	4.65334	4.65994	4.93536	4.92735	4.80775	4.7744	4.88522	4.00157	4.96043	5.25292
COBS01678	4.51443	4.92543	4.9838	5.61929	5.28094	4.00157	4.00157	4.00157	4.00157	4.00157	4.00157	4.00157	4.75649	4.87534	4.53523	5.18094	4.93536	4.92735	4.00157	4.00157	5.52672	4.00157	4.41045	4.4872
COBS01679	7.82834	8.22151	7.85511	9.22156	8.94465	10.7748	6.40926	6.77705	7.31501	7.60791	7.38377	7.38587	7.66363	7.84104	8.11464	8.42195	8.20548	8.60803	6.20412	6.79862	7.07127	7.30879	6.62869	6.76091
COBS01680	4.72315	4.92543	4.91335	4.93054	4.88559	5.23114	6.82078	4.92207	5.61979	4.46639	6.2109	5.01005	4.44071	4.62407	4.53523	4.46911	4.45613	4.66171	4.62923	4.94267	5.32561	4.44244	4.41045	4.78856
COBS01681	7.92301	8.57499	8.38538	9.8241	10.6758	11.762	9.52121	9.82903	10.275	7.97956	7.7128	9.26408	7.75689	8.15756	8.78646	11.0941	11.4004	10.958	10.7006	10.5354	9.64835	4.44244	6.71632	8.94786
COBS01682	7.12553	6.95392	7.0265	7.24312	7.10559	7.71409	8.04727	8.79711	8.79259	8.37272	7.73363	8.75701	7.38018	7.70028	6.84741	7.64715	7.57356	7.99598	7.67441	7.634	8.11921	4.44244	7.34494	7.87227
COBS01683	15.3447	14.5457	14.7184	12.3968	12.0669	14.6215	12.6339	12.6825	12.5422	13.221	13.163	12.7249	14.7221	14.9387	14.7424	13.3935	13.543	13.7384	13.0093	12.8336	12.4986	14.1719	12.8618	12.9375
COBS01684	4.00157	4.38409	4.00157	4.66402	4.36716	4.33945	5.69046	4.92207	5.58432	5.02391	5.47464	5.06232	4.44071	4.00157	4.37999	4.00157	4.00157	4.00157	4.00157	4.89054	4.63121	4.00157	4.81141	4.95972
COBS01685	4.00157	4.38409	4.37895	4.74063	4.72705	4.00157	4.92743	5.47861	4.37248	6.20639	7.99724	5.20339	4.00157	4.00157	4.00157	4.38387	4.64182	4.35662	4.62923	5.03811	5.1835	5.21712	5.17658	5.74147
COBS01688	4.72315	4.54097	4.37895	5.21568	5.75988	4.00157	5.64749	4.00157	5.4302	4.00157	4.00157	5.01005	4.00157	4.44343	4.53523	4.75966	5.03355	4.74829	5.17993	5.37683	4.51701	4.00157	4.47319	4.62658
COBS01689	4.00157	4.38409	4.00157	4.00157	4.51723	4.00157	4.72355	4.35454	5.03153	5.11707	5.0648	4.34381	4.00157	4.00157	4.00157	4.65994	4.52574	4.25294	4.51538	4.00157	5.59799	4.00157	4.81141	4.92028
COBS01691	4.36517	4.38409	4.00157	4.57651	4.88559	4.00157	5.01248	4.49951	4.52469	5.75833	5.68094	5.11173	4.44071	4.00157	4.00157	4.60343	4.26473	4.00157	4.88249	4.00157	4.81027	8.05655	4.74242	4.95972
COBS01692	7.3796	6.98048	6.06116	8.71947	10.4384	9.46525	9.69768	9.14312	9.93236	7.60791	7.1231	8.70779	5.88511	6.2094	6.8615	8.58626	8.96647	8.39637	8.92267	8.99911	9.02594	8.57399	6.3258	7.86089
COBS01693	4.00157	4.00157	4.00157	4.00157	4.51723	4.00157	5.40469	4.60994	4.00157	4.00157	4.00157	4.95444	4.00157	4.00157	4.37999	4.00157	4.00157	4.00157	4.51538	5.0822	4.81027	4.00157	4.62342	4.68519
COBS01694	4.00157	4.38409	4.00157	4.57651	4.81061	4.00157	6.14427	6.93596	5.87093	7.18982	7.40997	5.36471	4.75649	4.44343	4.53523	4.65994	4.58682	4.35662	5.52226	5.6826	5.87424	4.44244	5.79373	5.8943
COBS01695	4.00157	4.38409	4.65157	5.21568	4.36716	5.31079	4.72355	5.40459	4.96746	6.20639	6.2109	5.36471	4.62026	4.97491	4.7521	4.65994	4.69219	4.66171	4.88249	5.43899	5.48933	4.00157	6.14402	5.86194
COBS01696	4.00157	4.76009	4.65157	5.46877	5.56353	4.33945	5.69046	5.09424	5.75188	4.91966	6.91789	5.06232	4.44071	4.00157	4.65334	5.09319	5.09339	5.04643	5.22942	5.34434	5.45065	4.00157	5.40561	5.19517
COBS01697	9.62498	9.55037	9.68307	9.74971	9.65882	9.92046	9.56349	9.8028	9.89895	9.3639	8.95317	9.62686	9.67665	9.68334	9.62746	9.88984	9.94745	9.84244	9.80267	9.79393	9.78646	9.48393	9.67051	9.4394
COBS01698	10.9456	10.9968	10.2449	12.3827	12.9982	11.8245	13.421	12.4493	12.731	11.6907	12.6948	12.2343	10.4684	10.6155	10.1911	11.4243	11.4784	10.946	11.666	11.9382	12.5482	12.5655	11.1048	11.7722
COBS01699	5.44388	6.03332	5.36619	7.78071	7.41052	6.00509	7.27254	5.73421	6.12683	6.17154	5.93575	6.00603	5.84507	5.58125	5.68457	6.317	6.4211	6.29449	6.11694	6.54887	6.35022	4.44244	6.18064	6.87256
COBS01700	4.72315	5.18159	5.10952	6.28003	6.64073	4.33945	6.25671	5.99224	5.68767	5.3522	6.01026	5.36471	5.34641	5.35425	5.16953	5.44955	5.53182	5.24602	5.36487	5.34434	5.81807	4.00157	5.23884	5.60759
COBS01701	4.00157	4.66032	4.91335	6.21165	5.56353	4.00157	5.95491	5.04052	4.73743	4.00157	4.00157	5.68666	4.87008	4.44343	4.37999	5.12336	4.93536	5.12628	5.07255	4.99172	5.28042	4.62267	5.03839	5.22446
COBS01702	10.3123	10.862	10.3583	9.89744	9.99784	10.6013	8.55753	9.6962	8.44074	13.3331	13.9485	9.50442	10.5613	10.0764	10.3661	8.4456	8.7771	8.88774	8.09478	9.45467	9.87328	11.2558	10.7619	12.5312
COBS01703	10.3957	9.65343	10.032	9.37888	9.58105	9.37412	9.41552	9.5829	9.66161	10.3177	10.41	10.0283	9.92997	9.96496	9.8826	9.63958	9.57015	9.6351	9.36621	9.19545	9.79656	10.7907	10.6364	9.8287
COBS01704	8.6461	9.67359	9.88499	10.4367	9.54355	9.61084	8.28119	8.04046	8.17909	8.2743	8.1442	8.31019	9.47606	9.7958	10.0654	10.9807	10.8256	11.3403	9.64875	9.58719	7.85406	9.14651	9.20422	9.28686
COBS01705	6.41414	8.52254	8.90725	8.50038	7.27116	7.40916	6.60987	6.55245	5.78275	6.13574	6.72027	6.14945	8.51114	8.65794	8.96365	9.26669	9.4036	9.69914	8.62127	8.13242	6.72893	4.44244	8.48095	8.17121
COBS01706	7.18836	7.89625	8.24004	7.53383	7.37468	8.21778	6.87312	7.56736	7.52306	6.992	6.98969	7.23632	8.00488	8.27539	8.27338	8.31042	8.32602	8.15052	8.03369	7.78618	7.94801	8.66266	7.84794	7.29861
COBS01707	9.0489	9.29846	8.82539	9.31215	10.1915	9.84768	9.52657	9.68273	9.7869	9.42504	9.85588	9.46612	8.78542	8.48548	9.17776	9.4692	9.76092	9.80754	9.34813	9.27804	9.59536	9.08772	9.23247	8.86516
COBS01708	8.57424	8.76755	9.13382	8.72241	8.04296	8.86877	8.12721	8.33198	8.03965	8.81617	8.88992	8.59387	8.79031	8.59708	8.60094	8.80305	8.94627	9.02516	8.74051	8.72157	8.10841	7.25224	9.31699	9.13203
COBS01709	9.41828	10.4905	11.0246	9.93339	9.0185	9.89794	8.39701	8.36193	8.3493	9.39299	8.90828	8.80753	10.8051	10.719	10.8702	9.57468	9.54042	9.75802	8.93484	9.10782	8.71395	10.3321	10.174	9.57271
COBS01710	5.94541	6.42078	5.45337	8.13083	9.86971	10.0642	9.41552	7.264	8.48437	6.95283	5.77192	7.99276	6.16662	6.14594	6.18683	9.86642	10.4014	9.7059	9.98037	9.89727	6.72893	4.44244	6.57597	7.11141
COBS01711	4.80628	4.00157	4.53377	6.19399	5.01729	7.6325	6.05308	4.00157	4.00157	4.79992	6.43818	5.20339	4.00157	4.00157	4.00157	4.38387	4.64182	6.75026	4.62923	4.55127	4.00157	4.44244	4.33579	4.56146
COBS01712	11.2883	10.4325	10.66	10.4005	10.7304	11.3576	10.7373	10.9861	10.8317	11.414	10.9944	11.2235	10.5353	10.5587	10.5491	10.6128	10.509	10.4211	10.3655	10.3273	10.8496	11.5377	10.8106	10.3959
COBS01713	4.00157	4.00157	4.37895	4.00157	4.51723	4.00157	4.00157	4.00157	4.00157	7.50433	6.63256	5.06232	4.62026	4.00157	4.37999	4.27229	4.00157	4.00157	4.62923	4.45129	4.81027	4.00157	4.00157	4.39871
COBS01714	8.31576	8.75245	9.03413	9.21739	8.9687	8.55967	8.9171	8.83112	8.83024	7.60791	7.89016	8.9279	9.10469	9.08185	9.07765	9.46689	9.40017	9.53527	9.50116	9.34227	8.51608	4.00157	8.21915	8.9901
COBS01715	8.01752	7.49283	8.02414	7.58024	8.21905	8.25169	7.4536	8.13777	7.6206	7.9699	7.97994	8.38261	7.87245	7.85059	8.0002	8.04815	8.04192	8.21605	7.80002	7.49557	8.1926	10.0476	7.82604	7.61189
COBS01716	5.51965	5.33666	5.10952	7.29989	8.08768	6.75774	8.00171	7.81102	8.40031	6.09893	5.93575	7.54951	5.99807	5.72605	4.8384	8.8067	9.07491	8.79566	9.48884	9.53929	5.45065	4.00157	5.13275	7.29294
COBS01718	7.66979	8.02151	6.91034	11.6121	13.4775	12.5668	13.2699	12.9519	13.9541	11.2459	12.515	12.802	8.66815	7.62432	7.14011	13.3308	14.1551	12.8207	14.1874	14.4902	11.2777	10.2253	8.36834	12.3349
COBS01719	10.3758	10.227	10.1901	9.74538	10.1592	10.1752	9.91531	10.0004	9.90217	11.1014	10.6413	10.3156	10.4282	9.96715	9.84483	9.69972	9.71118	9.73261	9.66161	9.76559	9.88752	9.41229	10.8189	10.0029
COBS01720	16.7149	16.091	15.0783	9.06822	7.80239	9.73562	13.1968	14.2499	13.9846	13.2479	13.3842	13.824	17.4429	17.8637	17.2497	10.3968	11.0719	10.3316	14.49	13.6799	14.7228	12.5837	14.0806	14.676
COBS01721	8.00027	8.47271	8.81835	9.74971	8.59273	9.81836	7.16557	7.25482	6.7167	8.14311	8.35992	7.37797	8.29408	8.04587	9.01406	9.32515	8.79459	9.71681	7.7866	6.84959	7.36454	8.33171	8.4384	7.4436
COBS01722	9.91066	9.71308	9.97783	9.92321	10.7136	10.7102	9.9275	10.3738	10.4345	10.2176	10.1382	10.1015	9.86434	9.96715	9.89273	10.288	10.22	10.289	10.0308	9.7901	10.1787	9.66904	9.94852	9.43686
COBS01723	10.5738	10.2923	11.3426	9.04726	8.26841	8.50454	8.05472	8.55208	8.52253	8.55137	8.59355	8.3266	10.8653	11.6722	11.2063	9.47609	9.37018	9.84551	9.26385	8.86216	9.22604	8.74619	9.50542	9.56923
COBS01724	12.0142	10.9612	11.3166	10.3184	10.3184	11.0487	9.5995	9.664	9.92289	12.7125	12.5165	11.2196	11.2122	11.1311	10.9669	10.8418	10.6337	11.0653	9.74513	9.53625	10.0126	13.4425	12.6083	11.4868
COBS01725	4.36517	5.42853	4.91335	4.66402	5.01729	4.58417	6.14427	4.98335	4.00157	4.65614	5.85654	4.48445	5.51999	5.21973	4.9158	4.80452	4.86276	4.95872	4.62923	4.45129	4.72674	4.00157	4.70516	4.56146
COBS01726	11.0716	11.9972	12.1327	14.1909	13.6955	11.7617	12.3719	11.6522	11.9164	11.6499	12.1044	11.3278	10.8653	11.8173	12.0383	14.2894	14.1661	13.9544	12.4265	12.6561	11.8272	10.8673	12.7896	12.1903
COBS01728	4.00157	4.76009	4.00157	5.17383	5.98027	4.00157	5.40469	4.60994	4.00157	4.46639	4.62456	4.89485	4.96909	4.00157	4.00157	4.99619	5.17648	4.78773	5.44638	5.16451	4.367	7.56193	4.77775	4.95972
COBS01729	5.48241	8.02781	7.11061	9.48654	10.1448	6.10665	8.82445	5.92029	6.73157	5.02391	7.64842	6.50449	6.25817	6.93441	7.22912	7.73455	8.09383	7.36232	7.39298	7.59328	5.56291	5.5255	6.07734	6.32433
COBS01730	5.22726	5.86318	5.71424	8.37503	10.1115	8.04475	7.49822	6.73764	7.65168	6.61742	7.09092	7.11752	5.21259	5.85523	5.64962	6.78929	6.96713	6.44466	6.36287	7.178	6.09992	4.00157	5.48813	5.47912
COBS01731	6.17941	4.54097	4.65157	4.80946	6.5939	5.72158	4.83244	6.14585	5.54771	4.65614	5.0648	4.83041	4.00157	4.7611	4.37999	4.96131	4.7389	4.89473	4.36585	4.83471	5.66513	4.00157	4.93277	5.10156
COBS01732	4.36517	4.66032	4.00157	4.80946	4.63148	4.58417	5.40469	4.35454	4.00157	4.00157	5.22066	4.75988	4.00157	4.00157	4.37999	4.00157	4.37323	4.00157	4.62923	4.55127	4.95364	4.00157	4.81141	4.00157
COBS01733	4.00157	4.66032	4.00157	4.33497	4.36716	4.00157	5.29025	5.14499	4.82212	5.54418	5.68094	4.00157	4.44071	4.00157	4.00157	4.27229	4.26473	4.25294	4.00157	4.32021	4.51701	4.00157	4.84358	4.62658
COBS01734	9.99841	9.77222	10.0959	9.07743	8.7709	9.21385	8.68284	8.65929	8.35401	9.60056	9.26222	9.04642	10.0407	9.91604	9.85004	9.41282	9.15154	9.05194	8.93484	8.82516	8.73512	8.68929	9.95481	9.01418
COBS01735	8.89916	9.37925	9.37339	9.05428	8.69722	8.38367	9.18099	9.45201	9.48847	9.05348	9.05551	9.30599	9.17735	9.2129	9.60298	9.44948	9.49837	9.43515	9.71724	9.70176	9.54833	9.60063	9.59033	9.66028
COBS01736	7.90457	7.14179	7.90928	7.38473	7.07226	7.88626	6.43308	7.17921	7.11656	7.70446	6.43818	7.41706	7.46885	7.61313	7.50272	7.32166	7.10428	7.42148	7.04137	6.84959	7.22047	4.00157	6.67945	7.07874
COBS01737	12.5778	11.9192	12.0808	12.0172	11.6649	12.1824	11.4822	11.5244	11.4658	11.6716	11.5472	11.5671	12.0223	12.0805	12.2111	11.6245	11.6118	11.5707	11.3655	11.5241	11.6896	11.3712	11.3069	11.4782
COBS01738	7.6026	8.45882	8.19177	7.96645	7.45408	8.57313	7.59376	7.264	7.40924	7.31801	7.60382	7.27948	8.52881	8.44836	8.31425	8.19787	8.37805	8.41508	8.17922	8.18409	7.87335	8.46104	7.64071	7.92055
COBS01739	9.06829	7.95033	7.5311	10.167	11.7475	11.7737	11.8114	11.8157	12.1022	9.93568	9.00525	10.9446	7.63114	8.02076	8.11464	10.3036	10.7812	9.84627	11.3784	11.3731	11.6728	10.3555	8.58374	9.63279
COBS01740	9.65459	8.59206	8.90061	8.41197	9.07497	10.4189	8.59374	8.99283	8.60782	10.0267	9.61475	8.93326	9.13189	9.02001	8.68506	8.48721	8.43944	8.57331	8.11099	7.93301	8.94045	10.2289	9.16457	8.27184
COBS01741	4.00157	4.84726	5.16646	5.13009	4.63148	4.00157	4.72355	4.00157	4.00157	5.48382	6.63256	4.83041	4.44071	4.44343	5.11245	5.20849	5.14959	5.15144	4.80775	4.99172	4.00157	4.00157	5.29745	4.4872
COBS01742	8.12221	8.84431	8.71982	9.94728	9.05826	8.76122	8.72541	8.20547	8.81325	8.09952	8.1442	8.33067	8.37449	8.53942	8.92795	9.79378	9.97989	9.86072	9.67799	9.74198	7.78101	8.68401	8.98798	9.20108
COBS01743	5.07063	6.20688	6.41346	6.24629	6.21086	6.35501	6.11458	5.47861	4.89811	6.27342	5.93575	5.47133	6.78756	6.41021	6.29738	6.42947	6.39284	6.44466	5.69245	5.77647	5.92799	7.46603	6.28473	5.91017
COBS01744	8.28763	8.18818	8.65413	7.79762	8.00848	8.6418	7.906	7.87192	7.56451	7.58271	7.58099	7.86913	8.73561	8.81677	8.25251	8.24449	8.14665	8.48166	7.92162	7.97427	8.22793	9.61734	7.98266	7.84942
COBS01745	9.66917	9.09521	9.0819	10.4087	11.0934	11.4039	10.4284	10.1669	10.5434	9.42152	9.73265	10.361	8.5635	8.69008	9.21054	11.1019	10.8417	10.8337	9.95373	10.1089	10.1409	10.3489	8.79089	9.48931
COBS01746	6.13588	5.76851	5.92811	10.3415	8.31142	12.459	7.43076	6.26446	5.75188	7.37799	7.53419	6.5768	5.46512	6.17805	5.41429	13.0468	12.6889	13.7286	8.81814	6.05805	6.3877	8.68401	6.31768	7.07211
COBS01747	9.26833	8.04654	9.00963	9.88831	9.31422	10.3117	7.43076	6.95887	6.91158	10.8688	10.9531	9.09266	7.40608	7.30022	8.17694	10.2696	9.45176	10.3091	7.16161	7.533	6.33108	11.5602	11.2111	10.2008
COBS01749	6.0202	4.54097	4.53377	5.80197	4.72705	5.7988	7.35992	5.04052	4.00157	6.24033	5.93575	5.20339	5.57231	4.00157	4.65334	6.25141	4.45613	4.61349	8.93484	4.63505	5.07583	5.85151	5.27829	4.99739
COBS01750	5.07063	5.80089	5.04887	5.43608	4.81061	4.00157	4.92743	4.85579	4.73743	4.79992	5.0648	5.79404	5.34641	5.21973	5.64962	5.78388	4.64182	5.57317	5.17993	5.82081	5.48933	4.00157	5.84178	6.0014
COBS01751	4.00157	4.54097	4.37895	4.87236	4.00157	4.00157	4.00157	4.92207	4.00157	4.91966	5.35526	5.11173	4.00157	4.00157	4.00157	4.71169	5.06397	4.50244	4.62923	4.89054	5.32561	4.00157	4.93277	5.03348
COBS01752	7.28721	6.5703	5.71424	7.76361	9.92603	8.83007	8.06952	8.33198	7.36291	6.992	6.88056	8.00813	7.60906	7.12126	6.04051	9.94967	9.48228	10.3163	9.91128	10.3835	8.25754	4.00157	7.74662	8.98315
COBS01753	12.5362	11.8389	11.7671	11.5062	11.9695	13.0612	11.4544	11.8617	11.6733	13.4421	13.0658	11.7841	11.9748	11.586	11.7371	11.1633	11.2512	11.3371	10.6145	10.6119	11.778	13.0137	11.5025	11.6553
COBS01754	10.7674	10.6617	10.6882	10.8487	11.0721	11.4834	10.9926	10.9529	11.2788	10.5339	10.3609	10.94	10.5965	10.3334	10.7124	10.9272	10.915	10.7455	11.1966	10.9259	10.8632	10.4932	10.293	10.4963
COBS01755	9.51629	9.50384	9.42985	9.22778	9.57324	9.18787	9.35361	9.62754	9.75169	10.4166	9.73779	9.46982	9.42673	9.99953	9.70425	9.58429	9.50794	9.59017	9.81259	9.67707	9.84438	7.66262	9.83781	9.70426
COBS01756	9.89834	9.62058	9.50404	9.47961	9.88873	10.5073	9.13965	9.58652	9.50125	10.8081	10.243	9.93259	9.16987	9.26358	9.58226	9.52124	9.64432	9.6949	8.96482	9.13427	9.55032	11.0861	10.1544	9.406
COBS01757	9.83834	9.81095	9.78215	10.6133	11.1627	10.8423	10.513	10.5822	10.9294	10.5158	10.5362	10.6426	9.51494	9.64017	9.74584	10.6519	10.6649	10.6268	10.2388	10.0997	10.8218	10.1904	10.291	9.93065
COBS01758	9.55213	10.2351	10.0769	11.016	10.6694	10.6995	10.3774	10.2203	10.4803	10.0428	10.1067	10.2322	9.7386	9.95399	10.1676	11.0111	11.0568	10.9822	10.6728	10.5737	10.4263	10.2559	10.5745	10.5084
COBS01759	11.0695	11.3697	11.2997	11.3709	11.0783	10.3187	11.671	11.5976	11.5543	11.0981	11.3332	11.5269	11.0126	11.0313	11.3945	11.0354	11.0758	10.9485	11.2432	11.5765	11.5584	11.2005	11.692	11.7915
COBS01760	4.00157	4.00157	5.10952	5.03593	4.81061	4.00157	5.08996	5.44222	4.96746	5.42	7.62629	9.05136	4.62026	5.28919	4.9158	4.27229	4.86276	4.70643	5.22942	5.84239	5.41056	4.00157	6.69801	10.9112
COBS01761	8.40137	9.17659	8.26098	11.289	11.7177	10.4511	12.0669	11.4197	12.1737	9.96261	10.7082	10.8719	8.22344	8.07055	8.84682	10.848	11.3579	10.4735	11.9366	12.1178	11.6787	10.6188	9.31992	10.6869
COBS01762	10.3296	9.31396	8.58115	9.18792	10.7616	10.4114	10.044	10.4313	10.9302	10.11	9.9694	10.0775	8.64134	8.65794	8.96365	9.12322	9.53211	8.99098	9.43419	9.55744	10.2441	10.5767	9.37164	9.02776
COBS01763	5.31935	5.89318	5.68037	5.82595	5.59862	4.33945	5.69046	5.86992	5.65422	6.022	6.32938	5.47133	5.84507	5.63152	5.96058	5.86222	5.90238	5.8667	6.07105	5.73045	5.72866	4.00157	6.04768	5.87822
COBS01764	9.17689	9.37433	9.19212	8.96026	9.09695	8.79031	8.67803	9.12081	8.72877	9.24124	8.84299	9.25555	9.29201	9.17179	9.29703	9.61168	9.47037	9.79413	9.41912	9.24669	9.17016	8.68401	9.61755	9.10507
COBS01765	9.34071	9.68951	9.39719	9.53248	9.1868	9.3053	9.13965	9.03588	8.88005	8.3506	8.45047	8.78694	9.3361	9.02422	9.58435	10.1067	9.97837	10.3058	9.47433	9.4579	8.91594	8.31811	9.19998	9.06282
COBS01766	6.35922	7.33841	8.07829	7.94135	8.61957	7.36307	7.9862	8.13777	8.37735	6.39811	6.01026	8.2894	6.54849	6.67542	7.79853	8.83202	8.25441	7.79432	8.50764	8.2226	7.82793	4.00157	6.9654	7.2758
COBS01767	10.9803	11.142	12.1608	10.3425	9.35355	9.13445	9.68337	9.65022	9.7046	10.088	10.1028	10.0714	12.1715	12.4221	11.881	11.3421	11.0872	11.3573	10.8161	10.5331	10.0553	8.37174	10.8941	10.6826
COBS01768	5.22726	5.62952	4.91335	9.88176	4.51723	10.4664	4.72355	4.85579	4.52469	6.3057	7.35707	5.65824	5.57231	4.87534	5.71851	5.20849	4.58682	9.97488	5.55836	4.7744	4.95364	4.00157	5.5195	4.99739
COBS01769	7.08203	7.607	8.24004	7.83083	7.7821	8.12016	7.71192	7.34398	7.52306	7.69274	7.30211	7.58421	8.09476	8.12653	7.98761	7.82417	7.79231	7.87482	7.92775	8.31815	8.00738	4.44244	7.44933	7.75418
COBS01770	13.0327	13.4575	13.4553	11.4305	10.8189	11.2409	10.9354	10.7246	10.3369	10.7516	11.3601	10.7252	13.6564	13.9321	13.5764	12.0786	12.1811	12.6964	11.8441	11.667	10.4285	8.64645	11.8258	11.863
COBS01771	6.67442	7.8824	8.59357	7.47886	6.97927	4.00157	7.10887	7.2363	6.70167	7.31801	7.30211	7.38587	8.3146	8.33765	8.36375	8.32325	8.06233	7.97928	8.07286	8.03185	6.71448	4.00157	8.34357	8.17427
COBS01772	8.56256	7.42733	5.74719	6.96998	8.17313	8.03016	5.77203	5.04052	5.65422	4.00157	6.38488	4.95444	8.79518	7.91566	6.06607	10.713	9.05329	9.55692	7.59181	7.58736	4.63121	4.00157	5.98621	5.4089
COBS01773	6.37778	6.73675	6.11074	7.06706	6.7154	6.57808	5.81083	4.49951	4.00157	4.46639	5.35526	4.95444	5.88511	5.81367	6.25427	7.7986	6.88984	8.01248	5.59336	5.4688	5.41056	4.00157	5.84178	5.52358
COBS01774	8.04582	8.10727	7.83425	8.09943	8.10409	9.71303	6.69035	6.14585	6.67111	8.91984	8.1442	7.95096	8.22344	7.56747	7.74707	8.74519	7.73524	8.78612	6.4878	6.25816	6.40605	8.97544	8.15484	7.35405
COBS01775	4.80628	4.00157	4.83614	4.57651	4.36716	4.33945	4.00157	5.47861	4.00157	4.65614	4.87603	4.68136	4.44071	4.00157	4.00157	4.65994	4.37323	4.66171	4.00157	4.32021	4.00157	4.00157	4.96043	4.87883
COBS01778	11.0798	11.4063	10.959	12.28	11.6754	11.4619	12.0968	11.58	11.5916	11.1469	11.244	11.4016	11.1688	10.9353	10.9836	11.2297	11.3713	11.1529	11.1928	11.4894	11.6098	11.2779	11.127	11.4089
COBS01779	5.89297	7.33841	6.54247	9.28656	9.00112	8.54267	8.74393	9.01452	8.8833	8.34315	7.9447	8.67935	6.78756	6.58485	6.53041	7.37724	7.75332	7.33618	7.41066	8.02314	8.77656	4.00157	7.66562	8.43894
COBS01780	8.15893	6.98048	6.35416	9.26656	7.59292	5.7736	10.2651	7.59658	7.6896	7.33324	7.05798	7.21869	8.08682	6.35586	6.41894	7.8844	7.50252	7.13325	9.22722	7.88091	7.39167	9.76717	7.41292	8.09567
COBS01781	5.72083	6.45974	5.89973	8.25812	8.47164	7.07857	8.98093	8.54836	8.28658	7.12107	8.15964	7.9979	6.06816	6.07922	6.16356	6.60404	6.64411	6.08185	6.80571	7.20931	7.81468	4.44244	6.83258	7.2051
COBS01782	13.7389	11.0663	11.9714	7.49972	8.26841	10.2314	11.4698	12.735	12.4858	11.8487	11.3501	12.4789	12.104	13.0158	12.1438	7.67554	7.72428	7.74573	10.1902	10.0103	12.3438	12.5174	10.0572	10.6778
COBS01783	6.9057	5.47171	6.92373	5.61929	7.52927	5.98377	9.55566	10.1076	9.97267	8.08171	8.1442	9.29563	6.66234	6.5372	6.54813	5.15258	5.83093	5.71421	7.87802	7.90483	9.95066	4.44244	6.78724	7.66529
COBS01784	4.00157	5.33666	4.75006	5.4024	5.66578	4.33945	6.30953	5.79032	5.75188	9.48708	9.77324	5.28722	4.96909	4.44343	4.7521	5.06201	5.20265	5.12628	5.66034	5.98381	6.31166	5.47046	5.11005	9.60022
COBS01787	7.08203	7.21042	6.4516	8.64699	9.3581	6.8731	9.3139	8.24277	9.1061	6.97256	6.95426	7.82927	6.34378	6.65333	6.77473	8.19228	8.52163	7.86878	8.71603	9.22603	8.71395	4.62267	6.35776	7.87604
COBS01788	4.88089	4.38409	4.65157	6.98	5.07627	5.45396	4.92743	4.35454	5.14736	5.6015	5.22066	4.00157	4.00157	4.00157	4.7521	4.54066	4.37323	7.40901	5.17993	4.89054	4.00157	4.44244	5.15492	4.83505
COBS01789	4.80628	4.66032	4.37895	6.17608	4.72705	6.88412	5.08996	4.70236	4.00157	4.79992	4.00157	5.11173	4.00157	4.00157	4.37999	4.54066	4.26473	6.04842	4.51538	4.45129	4.63121	4.00157	4.52828	4.4872
COBS01790	4.00157	4.54097	4.00157	5.17383	4.95404	4.99763	4.42128	4.92207	5.54771	5.42	7.21544	4.59162	4.44071	4.00157	4.00157	4.80452	4.52574	5.68429	4.95071	5.24034	5.01687	4.62267	4.52828	5.28059
COBS01791	8.87104	9.07715	9.39719	8.65008	8.52537	9.20955	8.22289	8.80335	9.12549	9.18411	8.81407	8.89256	8.96905	9.05743	9.11276	9.02001	9.2448	9.08731	8.93181	8.67795	8.7281	4.44244	9.59113	8.8365
COBS01792	7.95322	8.0589	8.10751	8.57066	8.24887	8.96118	8.36144	8.75262	8.41391	11.876	10.0908	8.46274	7.97075	8.06237	8.29906	8.93577	8.73423	8.80514	8.54784	8.46021	8.73862	11.291	8.23996	7.89476
COBS01793	4.80628	5.18159	4.83614	5.82595	6.47792	6.32226	5.08996	4.98335	5.61979	5.75833	5.77192	4.89485	5.05767	4.7611	4.8384	5.92151	6.0589	5.78589	5.78392	6.11103	5.23313	4.44244	4.77775	4.87883
COBS01794	5.51965	6.18346	4.91335	6.64278	5.48993	6.73347	6.14427	5.76259	6.32054	7.50433	7.18533	6.76101	6.66234	5.14504	5.05165	5.49188	5.20265	5.9052	5.62733	4.89054	6.86574	4.00157	5.55001	6.17923
COBS01795	10.6363	10.4337	10.8295	8.85431	8.11493	8.46537	8.83312	9.83209	9.62705	9.60678	9.39823	9.82142	11.0343	11.1629	10.9725	9.74704	9.2911	9.69405	9.86437	9.36649	10.2156	10.1295	10.0054	9.96456
COBS01796	10.5873	10.3104	10.443	10.5361	10.4776	9.47782	10.4039	10.2763	10.6206	10.1722	9.95624	9.98382	10.2358	10.4875	10.7491	10.4973	10.671	10.6039	10.4611	10.3877	10.0083	10.2434	10.3297	10.0749
COBS01797	8.87734	9.61642	9.63186	10.1562	9.88716	9.57955	9.37157	9.19627	9.42953	8.8428	9.41115	8.94127	9.24297	9.76096	9.8535	9.71729	9.87127	9.75721	9.95522	9.85633	9.15977	6.73479	9.70526	9.66897
COBS01798	8.19473	8.05273	8.21878	8.43728	8.7222	8.522	8.07686	8.12783	8.01602	8.2506	8.06443	7.85785	8.30095	8.24683	8.10884	9.19325	9.15696	9.30323	8.77139	8.55673	7.76043	7.46603	8.54082	8.3924
COBS01799	10.0467	10.4111	9.78035	10.3106	9.33054	9.66676	12.8897	12.8072	12.9379	11.8074	11.9777	13.8288	10.2483	10.6169	10.5297	10.2103	9.47688	9.4851	12.3658	12.6374	13.1545	12.2853	10.9989	13.8295
COBS01800	10.0866	9.70526	9.34676	8.75438	8.75023	9.15918	9.34454	9.32764	8.86693	9.25319	9.66954	9.17866	9.43299	9.8489	10.8189	8.79755	8.70677	8.9084	8.85062	8.75868	9.72259	10.2683	9.13716	9.34495
COBS01801	9.62311	9.45342	9.7548	9.12265	9.18167	9.24988	9.28259	9.22909	9.38655	10.6271	10.869	9.52053	9.59527	9.27774	9.47844	9.48296	9.40246	9.42187	9.27824	9.26889	9.60879	9.47479	10.1196	9.57387
COBS01802	10.388	10.2091	10.9582	9.44444	8.53346	8.70428	8.74393	9.23141	9.51181	9.65261	9.55197	9.398	10.9386	11.3478	10.7047	9.79745	9.68892	9.73591	9.80433	9.69084	9.24337	7.45357	10.0584	9.89128
COBS01803	10.1148	9.22112	9.72878	8.58043	9.50092	9.7812	9.61717	10.2548	10.063	10.1532	9.75815	10.6572	9.695	9.64564	9.51825	9.4738	9.32638	9.18729	9.73474	9.61922	9.7999	8.63005	9.51907	9.76732
COBS01804	8.71102	8.80461	9.05523	8.02973	8.14697	7.97534	9.02701	9.27921	9.23157	8.99297	8.86195	10.3115	9.47909	9.75844	9.11276	9.24935	9.17042	9.24179	9.99642	9.77596	9.5818	8.8347	8.9494	10.6523
COBS01805	8.01752	8.21601	8.33691	8.25812	7.7684	4.82007	8.06214	8.32764	8.13044	7.44956	7.62629	8.21198	8.28717	8.33765	8.34908	8.57773	8.91622	8.97288	8.72307	8.65282	8.49554	4.00157	8.42211	8.74899
COBS01806	7.802	7.94368	8.46421	7.72289	7.15946	7.57987	6.9562	7.2363	7.21405	7.93061	6.67712	7.45511	8.38099	8.82161	8.56755	8.05433	7.87386	8.27188	7.87168	7.85167	8.03045	8.8347	8.13052	7.75418
COBS01807	9.79911	10.0867	10.0167	10.1332	9.99052	9.99599	9.55828	9.85178	9.52439	9.11592	8.89913	9.38828	9.74365	10.1104	10.3673	10.3139	10.5342	10.4195	10.0152	9.94974	9.62588	7.87311	9.57896	9.69366
COBS01808	8.44446	8.04654	7.9486	8.09033	8.14168	7.55962	7.91423	7.91884	7.73382	7.50433	7.30211	8.00813	8.23067	8.59141	8.44418	8.24719	8.47245	8.60622	8.19452	8.31459	7.92971	4.00157	7.56656	8.02274
COBS01809	11.0818	10.9255	11.091	10.6267	10.7391	10.1664	10.3369	10.0822	10.0716	10.9736	10.9772	10.1425	11.2031	10.8841	10.8565	10.5269	10.4002	10.3512	10.1902	10.2485	10.3102	10.9531	11.163	10.6296
COBS01810	12.4879	12.2533	11.7273	10.5813	10.5117	11.1151	10.6651	10.785	10.4695	11.3413	11.2601	11.0932	12.2511	12.2948	11.6502	11.1353	11.0433	11.151	10.9885	10.8537	10.9599	11.3596	11.4739	11.1571
COBS01811	4.80628	6.08533	4.83614	6.1019	5.28094	6.9485	5.16141	4.49951	4.89811	6.022	5.22066	5.15866	5.21259	5.14504	4.9158	4.80452	4.52574	5.69934	4.80775	5.20316	5.1835	4.00157	5.29745	5.54516
COBS01813	4.00157	4.38409	4.00157	5.13009	5.18399	4.00157	5.69046	5.19318	5.03153	5.11707	6.01026	4.89485	4.00157	4.00157	4.37999	4.65994	4.69219	4.89473	5.12777	5.70676	5.23313	4.00157	4.96043	5.8943
COBS01814	7.1573	7.14179	6.47026	9.25848	9.64583	8.77293	10.1536	10.2571	10.9024	9.66161	10.2101	10.6741	6.47532	6.48782	6.99505	9.24262	9.57724	8.80356	10.3141	11.0051	10.0953	9.15417	9.41975	10.9039
COBS01815	4.00157	4.38409	4.00157	4.98486	5.07627	4.00157	5.34902	5.47861	5.58432	5.02391	4.00157	5.11173	4.00157	4.00157	4.53523	4.38387	4.69219	4.50244	5.01375	5.37683	5.1835	4.00157	4.81141	4.95972
COBS01817	4.51443	4.66032	4.65157	5.43608	5.32615	4.00157	5.64749	5.32512	5.61979	7.03011	6.43818	5.68666	4.44071	4.7611	4.9158	4.71169	4.86276	4.98896	5.22942	5.37683	4.63121	4.00157	6.64155	6.2658
COBS01818	4.00157	5.12398	4.83614	5.59073	5.32615	4.00157	6.05308	5.58118	6.25908	6.93283	6.53884	6.27862	5.05767	4.97491	4.8384	4.80452	4.89988	5.07383	5.40639	5.37683	5.59799	4.00157	6.91378	6.30123
COBS01819	4.00157	4.84726	4.00157	5.25583	5.13166	5.27175	5.69046	5.67536	4.00157	4.46639	5.47464	5.53709	4.00157	4.00157	4.00157	4.00157	4.37323	4.00157	4.51538	5.0822	4.367	4.00157	5.13275	4.95972
COBS01820	7.84779	9.42278	9.87147	10.7635	11.1285	10.3954	8.41447	7.87787	8.24658	8.61457	9.14334	8.79874	7.65289	8.59708	8.56755	10.0079	10.0901	10.1554	8.22958	8.44727	8.13525	9.38	9.19892	8.80529
COBS01821	5.01193	5.28755	5.31979	5.43608	5.41113	4.00157	4.00157	5.04052	4.00157	4.00157	4.62456	4.95444	4.96909	5.06398	5.4983	4.80452	4.82376	4.78773	4.80775	4.94267	4.51701	8.61346	4.87445	5.1338
COBS01822	5.36249	6.18346	6.62765	6.64278	7.23156	6.6836	6.11458	5.86992	5.58432	5.80636	6.01026	5.28722	5.40739	5.63152	5.53805	6.08429	6.36396	6.33137	5.27658	5.43899	5.07583	8.46721	5.80592	5.54516
COBS01823	12.3332	12.3472	11.8067	11.8205	12.2502	11.8103	12.091	12.3479	12.2128	12.1162	11.8985	12.4871	11.6288	12.5482	12.4849	11.7231	11.5882	11.6	11.6755	11.8063	12.4099	11.6784	11.8075	12.007
COBS01824	11.9784	12.5194	12.1649	13.0097	12.8749	12.0773	13.3925	13.0275	13.369	12.5698	12.7196	12.9355	12.1512	12.2609	12.2115	12.6552	12.6838	12.5466	13.0579	13.2426	13.1553	12.5551	13.1448	13.1833
COBS01825	11.0599	11.6197	12.4753	11.0799	10.5757	10.9543	10.6283	10.9633	11.0415	10.9603	10.8406	11.0769	11.0578	12.0313	11.8445	11.1651	11.0943	11.4092	11.0858	10.9438	11.2461	8.52751	11.3524	11.4295
COBS01826	7.57169	8.30677	8.67766	8.19164	8.29722	7.79702	8.04727	8.18645	7.92377	7.99868	7.64842	7.98242	8.33484	8.35112	8.55908	8.38083	8.54457	8.35821	8.21965	8.09968	8.49554	4.00157	8.65512	8.08594
COBS01827	11.9103	11.5163	11.399	11.6204	12.0296	11.717	12.393	12.2142	12.5479	11.6469	11.8472	12.5455	11.546	11.6044	11.3251	11.1637	11.3416	10.8728	11.8058	11.9653	12.2489	12.2682	11.4909	12.1466
COBS01829	5.12576	5.55334	5.6455	5.87255	6.21086	4.00157	5.84845	5.14499	5.09127	4.65614	6.08065	5.11173	4.87008	4.87534	5.90435	5.97812	6.0589	6.13571	5.75419	5.94501	4.72674	4.44244	4.66564	5.3338
COBS01830	4.00157	4.66032	4.53377	4.93054	5.07627	4.00157	4.00157	5.04052	4.00157	4.00157	4.00157	5.36471	4.00157	4.00157	4.53523	4.65994	4.58682	4.66171	4.72447	5.03811	4.00157	4.00157	4.47319	4.73885
COBS01831	11.5533	11.988	11.9218	12.2252	12.0928	12.1539	11.6473	11.1861	11.2973	11.1962	11.5632	11.1802	11.7701	11.9139	11.9833	11.7414	11.7286	11.8162	11.1628	11.2367	11.1641	11.5908	11.1439	11.0835
COBS01832	10.341	4.38409	4.75006	4.33497	8.19372	10.888	12.5575	9.99493	10.7837	9.90319	11.3332	9.86412	4.75649	4.7611	4.00157	4.60343	4.26473	4.56086	4.51538	4.70844	8.93436	10.5127	4.47319	4.4872
COBS01833	11.5786	11.6377	12.2378	10.5707	9.92756	10.8128	11.6194	11.9465	12.0128	11.0936	11.3618	13.3221	12.1436	12.558	12.1335	11.6211	11.4208	11.4595	12.45	12.4212	11.9012	10.657	11.0661	13.4635
COBS01834	9.69076	8.97033	9.21104	8.54429	9.57128	10.0268	8.66837	9.44404	8.9155	10.3347	9.62032	9.46797	9.30913	9.12557	9.04772	8.97038	8.90821	9.0319	8.51577	8.56574	9.32005	10.3253	9.69628	8.85377
COBS01835	12.4055	11.8064	13.2932	10.6022	10.3554	11.3197	10.0681	10.3926	10.4793	10.6438	10.4291	9.98898	12.6593	13.3968	13.0943	11.4688	11.3704	11.4808	11.0102	10.8935	10.3655	9.98246	10.8974	10.6848
COBS01836	10.2494	10.6827	10.8119	9.94728	9.46335	10.0546	9.5661	9.85329	9.56755	9.68238	10.3938	9.78485	10.6242	11.0039	10.5682	10.2144	10.1639	10.2169	10.2703	10.1393	9.59729	9.60622	10.7022	10.3715
COBS01837	8.15893	8.13086	8.15306	8.84354	9.02712	9.4796	8.67803	8.98186	8.95321	8.55782	8.31929	8.88704	8.05461	7.98657	8.09129	8.91561	9.12276	8.91133	8.90731	8.99467	9.13079	6.69236	8.51205	8.76327
COBS01838	10.6828	10.9848	10.9226	11.1272	10.6903	10.6417	10.1221	9.92083	9.96346	10.2358	10.2101	9.88224	10.5839	10.8094	11.0649	11.2233	11.1401	11.2488	10.6286	10.477	9.91249	10.9953	10.8068	10.476
COBS01839	11.7077	12.0521	11.5818	12.5398	12.7592	12.3044	12.2176	12.0373	12.2095	11.9266	11.9008	12.0772	11.588	11.5652	11.6447	12.2907	12.232	12.1891	11.8161	11.9925	12.051	12.6177	11.9968	11.7383
COBS01840	4.00157	5.80089	5.10952	5.77751	5.75988	4.00157	5.01248	5.36559	5.61979	4.46639	4.87603	4.89485	5.28168	4.7611	5.81495	5.51245	5.64015	5.55639	5.62733	5.96456	5.36893	4.00157	5.08678	5.50157
COBS01841	11.0142	11.1456	10.6521	11.0935	11.3623	10.1052	13.0139	13.0236	12.8665	12.1314	12.4422	12.8463	11.1423	11.3653	10.9645	11.3852	11.3852	10.8558	12.7192	12.8739	12.7178	11.5659	12.1385	12.5275
COBS01842	10.0866	9.19624	9.07011	9.21948	10.1101	11.1076	9.89476	10.1765	10.1736	9.98428	9.54613	10.1414	8.92084	9.24568	9.23995	9.37396	9.5671	9.69575	9.25902	9.46593	10.0083	11.1688	9.39959	9.34766
COBS01843	12.9047	12.8429	12.9508	12.5638	12.4543	12.7145	12.1411	12.2431	12.4429	13.4508	13.1687	12.8879	12.8948	12.7523	12.8781	12.6099	12.3586	12.3782	12.3531	12.3025	12.3609	13.6716	13.6849	12.8348
COBS01845	6.65953	6.25251	6.27074	5.80197	6.44288	7.81986	6.30953	6.62666	7.33436	7.36323	6.01026	6.77327	6.25817	6.11301	5.98779	6.10952	5.94336	6.13571	6.18286	5.79884	6.29195	4.00157	6.31768	5.79456
COBS01846	9.88747	10.2673	10.2747	10.0826	9.54154	9.93224	9.06063	9.47369	9.24429	9.78471	9.65875	9.52053	10.3707	9.96277	10.2774	10.2096	10.1014	10.2363	9.7434	9.6062	8.99994	8.73089	10.4134	9.85177
COBS01847	11.7477	11.7908	12.1814	10.6508	10.277	11.0073	10.2554	10.472	10.3511	10.604	10.397	10.5714	11.9972	12.0765	12.0021	11.136	11.1513	11.2249	10.9695	10.8598	10.7186	10.458	11.1674	10.7915
COBS01849	10.0633	8.99619	9.44134	8.22941	8.9047	9.96064	8.86307	9.0956	9.05499	9.66161	9.13557	9.35073	9.75118	9.62365	9.16667	8.84807	8.56102	8.73083	8.70185	8.42434	9.21854	8.32492	8.85425	8.32239
COBS01850	9.0377	9.31396	9.35407	8.98741	9.05265	9.98095	8.92929	8.71336	9.08644	8.73321	8.9264	8.85915	9.51789	9.2312	9.20242	9.38865	9.3841	9.4012	9.23953	9.18381	8.7281	8.65187	9.02794	9.01759
COBS01851	9.36778	9.62473	8.97841	9.39186	9.0185	8.54949	9.14314	8.8433	8.84034	8.71025	9.16639	9.09744	9.53545	9.35321	9.10406	9.49772	9.37599	9.49098	9.38628	9.30336	8.84632	4.00157	9.51822	9.55992
COBS01852	10.9061	10.3359	10.6202	9.98692	10.0494	10.1327	10.352	10.3675	10.6216	10.5773	10.1574	10.5791	11.001	11.194	10.4126	10.1901	10.2122	10.214	10.3059	10.2826	10.4155	10.3737	10.3403	10.3303
COBS01853	9.20468	9.19066	9.21373	9.45331	8.78451	9.3253	8.49874	8.45222	8.40939	9.31151	9.03895	8.59048	9.67929	8.9598	9.10115	9.75084	9.41155	9.44224	10.2787	9.0913	8.79011	9.96079	9.8668	9.41249
COBS01854	9.98537	10.2146	10.3077	10.3329	9.97578	10.3916	9.07897	9.27697	9.56349	9.18411	9.40471	9.45126	9.98211	10.0249	10.4656	10.1754	10.1592	10.4262	9.33212	9.21654	9.16757	10.4795	9.38475	9.15851
COBS01855	10.8025	10.8255	11.036	10.7097	10.788	10.3964	10.4734	10.4111	10.6553	10.6767	10.3475	10.5252	10.9691	11.3181	11.1497	11.0044	11.0149	11.0755	10.8843	10.9259	10.4371	9.2609	11.0098	10.716
COBS01856	7.3796	7.63209	8.17531	7.14015	6.95503	7.79126	7.95466	7.42785	6.41707	8.0454	7.96243	7.41706	8.28717	8.23233	7.58053	7.56275	7.49392	7.50584	7.66709	7.77583	7.24055	4.00157	7.99251	7.90587
COBS01857	13.3825	12.1293	14.0013	10.5593	9.47598	10.7094	11.3121	11.8489	11.8334	11.5773	11.5147	12.3447	13.7639	14.5115	13.3041	10.7883	10.8517	10.9058	11.9698	11.6663	11.9259	11.7496	12.2441	12.8815
COBS01858	10.4271	10.4618	10.8128	9.8619	9.3896	9.80133	9.88437	10.0949	9.66918	10.0056	9.91148	9.9864	10.9658	10.7811	10.7379	10.1562	10.107	10.2057	10.0644	10.0037	10.4785	9.09171	10.652	10.0174
COBS01859	8.32502	8.907	8.03026	10.0195	10.6294	8.54949	10.9293	10.2774	10.4619	8.14311	8.37321	9.8753	8.245	7.92472	9.33717	10.1669	10.7362	9.85769	10.9328	11.1909	10.6025	8.13627	8.72313	10.2246
COBS01860	9.62124	8.97033	8.22945	8.3021	8.13637	7.68948	9.39518	9.50273	9.37039	8.16864	8.95317	9.0139	8.33484	8.00377	9.87239	7.97189	8.22628	7.98765	9.38184	9.59746	9.37724	7.81607	8.68423	9.50759
COBS01861	12.5754	12.0912	10.8521	10.1703	10.1825	10.5521	10.7129	11.0976	10.8198	11.3617	11.3213	11.8186	12.2413	11.8526	11.6139	10.7697	10.7199	10.7327	11.1801	11.0448	11.3062	12.0936	11.6499	11.5633
COBS01862	9.18198	9.14805	9.22706	9.32188	9.22722	9.8463	8.51501	8.88805	8.65438	9.40018	9.17399	9.0758	9.30572	9.26713	9.35926	9.34914	9.34667	9.42187	9.29013	8.89109	9.01444	9.24305	9.46278	8.86327
COBS01863	11.4266	11.6576	11.2126	11.4088	11.7626	11.894	10.9593	11.2577	11.1428	11.7183	11.7089	11.1768	11.3656	11.2534	11.2686	10.9722	11.138	11.0341	10.5993	10.6133	11.265	11.5464	11.0007	10.5781
COBS01864	10.6738	10.5754	10.7707	10.5477	9.67168	10.8402	7.78558	7.58933	7.20354	12.1025	11.3179	9.7397	10.2903	10.2042	10.6835	8.56915	8.41927	9.00475	7.42812	7.71754	7.53633	12.1814	11.7275	9.98992
COBS01865	9.48984	9.95953	10.0516	9.82683	9.66066	8.66712	9.40102	9.13077	9.29655	9.26898	9.60354	9.31833	9.76116	9.68334	10.0549	10.2537	10.1381	10.469	9.93418	9.82422	9.32935	10.7073	9.86346	9.54229
COBS01866	5.40395	5.80089	5.53415	7.02903	7.39271	5.14457	5.84845	5.04052	6.12683	5.48382	4.87603	5.32668	5.71645	5.52868	5.4983	7.54525	8.56102	7.50193	7.73161	7.86148	5.48933	4.00157	4.98721	5.98665
COBS01867	7.92301	7.67296	7.96147	7.93119	8.42455	8.19617	7.68329	8.24736	7.84543	8.16864	7.97994	8.34283	8.15676	7.75216	7.85515	8.09383	8.16293	8.10768	8.07837	7.72832	7.86695	4.00157	7.89339	7.75418
COBS01868	11.4163	10.8523	10.7888	11.0474	11.3809	11.8557	10.1605	10.6872	10.2775	10.9555	10.5968	10.7306	10.7321	10.7699	11.0016	10.9406	10.76	11.1083	10.0616	9.82921	10.5929	10.7883	10.4912	10.0928
COBS01869	6.17941	5.42853	4.65157	7.01936	9.92142	4.58417	5.77203	4.49951	4.37248	5.3522	4.87603	4.83041	5.34641	4.87534	5.11245	7.42114	7.25498	7.33618	5.17993	4.70844	4.63121	4.00157	5.03839	5.06816
COBS01870	5.12576	6.4404	5.31979	7.14902	7.29056	4.00157	6.83845	5.79032	6.14982	6.53927	7.1231	6.29608	6.06816	5.35425	5.78365	6.07149	6.59579	6.23717	5.81293	6.21093	5.95402	8.05655	6.33386	6.35825
COBS01871	6.13588	6.81298	6.3131	8.89919	8.50494	7.38631	9.02701	7.53752	8.01602	6.51219	6.88056	6.94524	6.22835	6.2094	6.01442	8.65074	9.20089	8.03419	9.82734	9.76168	7.73954	4.00157	7.06797	8.09243
COBS01872	6.58255	8.20494	8.65413	11.2355	9.42695	9.78698	7.57308	6.92436	7.75542	5.75833	5.68094	7.08862	7.63114	7.35516	8.33426	10.9956	10.919	11.0558	8.80825	8.89823	6.23101	4.62267	6.70414	7.74181
COBS01873	8.38819	10.03	10.0183	12.1467	10.7145	10.6979	10.2967	8.9286	9.45602	8.32057	8.61607	9.05382	9.49414	9.43127	9.80425	11.4202	11.5375	11.5802	10.4695	10.8768	9.2726	4.00157	9.31013	10.1667
COBS01874	7.23865	7.19922	7.56534	8.8245	7.95516	8.16536	8.55753	8.4241	8.30617	9.80379	10.0293	8.72954	7.07491	6.78084	7.05733	8.28703	8.28942	8.47375	8.37533	8.63297	8.37022	9.76217	10.348	9.49421
COBS01875	13.7061	12.9187	12.7122	12.0345	12.3829	13.1279	13.7294	13.7311	13.6304	13.5378	13.7811	14.1281	13.0831	12.953	12.7572	12.786	12.6783	12.6908	13.4835	13.4362	13.793	13.6977	13.1472	13.6237
COBS01876	10.3902	9.50384	9.18667	8.25405	8.21402	9.88183	9.30769	9.95486	9.76235	9.79019	9.6749	10.3973	9.53545	9.24928	9.41423	9.45415	9.21654	8.90987	10.0972	9.82422	9.83134	8.98835	9.86613	9.82676
COBS01877	12.1401	11.9414	11.9777	12.0921	12.9955	11.8873	12.679	13.0974	13.1152	13.2513	13.1711	13.0187	12.1181	12.3603	12.2017	13.5099	12.7082	13.1145	13.3413	13.2695	13.4114	12.3064	12.8595	13.3698
COBS01878	7.48306	8.38235	8.54322	8.89919	7.84866	6.73347	8.00171	7.99742	7.38162	6.8498	7.32986	7.32135	8.05461	8.33765	8.16021	8.7716	8.92578	8.74074	8.86659	9.08714	8.1926	4.75941	8.21285	8.41327
COBS01879	7.80863	9.4204	8.27649	9.57049	9.42043	7.15299	9.2079	8.99828	9.61339	8.47848	8.09687	8.98322	8.70487	8.2396	8.90809	9.8435	10.172	9.80439	10.1953	10.3492	9.15977	4.00157	9.28037	9.54111
COBS01880	9.37669	10.1714	9.75664	9.50884	8.60429	8.26835	7.27254	7.66022	7.2451	10.2518	9.80295	8.37868	9.57561	9.12948	9.61731	8.98336	8.82044	8.53012	7.77305	7.67916	7.66022	4.75941	10.8005	9.20257
COBS01881	8.57036	8.73719	9.49524	8.27025	8.27325	8.12475	8.13426	8.18166	7.83195	8.41596	8.53566	8.68254	9.1885	9.06153	8.72724	8.76786	8.53419	8.80985	8.37533	8.32878	8.07552	9.14266	9.01715	8.58172
COBS01882	6.58255	9.11008	8.92701	9.68037	8.14697	7.11627	8.2491	8.82806	8.23128	10.1532	10.4355	7.37797	8.62501	8.62506	9.00162	9.41521	9.24988	9.19572	9.48471	9.65898	8.25265	4.00157	8.83935	8.8914
COBS01883	12.1564	12.2242	11.6898	12.5788	12.9973	12.1703	12.9105	12.8407	13.2365	12.4259	12.0864	12.5668	11.7332	11.8479	11.9029	12.3433	12.2884	12.1897	12.5132	12.6513	13.0042	11.9904	11.9185	12.0471
COBS01884	12.602	11.8115	11.3352	11.8683	12.7818	12.8265	12.4083	12.3609	12.4519	12.1178	11.7678	12.3203	11.3081	11.5124	11.3897	11.4423	11.6471	11.2921	11.4016	11.5035	12.2639	13.5599	11.2675	11.3715
COBS01886	7.11478	6.88524	6.27074	6.82162	8.3067	7.99551	7.34777	7.7145	7.55632	6.71512	7.40997	7.6771	6.66234	6.14594	6.63342	6.63811	6.64411	6.6534	6.80571	6.45877	7.57621	4.00157	6.3258	6.44473
COBS01887	11.1906	10.2567	10.4211	11.0637	12.0224	11.8677	11.5429	11.1227	11.3582	10.8361	10.8549	11.2414	9.92332	10.4691	10.4667	11.289	11.0264	11.1698	10.6276	11.4312	10.8119	10.8846	10.4343	10.7134
COBS01888	9.85756	8.65025	8.45969	9.40839	10.2794	10.4601	10.1776	9.93936	10.0486	9.76537	9.23341	9.79519	8.51114	8.49157	8.60506	8.82483	9.14611	8.80671	8.93484	9.14432	9.76434	9.19187	8.48618	8.84036
COBS01889	10.1709	11.402	11.2345	11.8419	11.1808	10.3464	10.7961	10.3665	10.42	10.5899	11.3006	10.35	11.1212	11.024	11.1893	11.3475	11.292	11.2479	10.9739	11.0948	10.5013	10.2771	11.8592	11.3069
COBS01891	9.09284	8.65838	8.75342	8.7312	9.37394	9.87913	9.04578	8.84934	9.31838	9.64053	9.204	9.19883	8.46905	8.47321	8.48052	8.51654	8.50471	8.74895	8.12703	8.09137	8.91594	9.88229	8.70381	8.31409
COBS01892	12.0957	12.9956	12.5016	13.716	13.1812	12.9683	12.601	12.0899	12.3176	12.2992	12.5879	12.2122	12.3532	12.3984	12.7035	13.2348	13.1408	13.2006	12.7686	12.8413	12.1908	11.6968	13.0004	12.7045
COBS01893	7.8606	8.88986	8.70845	9.79648	9.2858	9.04319	9.14314	7.98094	7.91101	8.19372	8.74426	7.55652	7.89994	8.2683	8.49392	8.96386	9.16505	9.29877	8.72657	8.74553	8.34746	9.01384	8.5425	8.86137
COBS01894	13.0345	11.842	12.4328	11.389	11.4777	13.086	11.5249	11.8931	12.2902	12.6745	12.1523	12.277	12.1079	12.3031	11.961	11.3858	11.2628	11.4848	11.3497	11.3963	11.5304	13.4161	11.9654	11.8339
COBS01895	10.0674	10.3296	11.1579	9.95354	9.50503	9.9759	9.91327	10.1968	9.75703	10.5125	10.4003	10.2697	11.1036	11.5004	10.8522	10.7725	10.7185	10.8232	10.7616	10.6191	10.1606	8.13627	10.796	10.6157
COBS01896	11.7958	11.5136	11.9934	11.5256	11.6267	11.2425	11.3275	11.6659	11.4772	11.6988	11.589	11.5739	11.8853	12.0653	12.0257	11.8417	11.5711	11.635	11.4569	11.3363	11.6179	10.7759	11.8427	11.1486
COBS01897	8.99202	9.25094	8.76445	9.81449	9.31422	9.49557	9.45817	9.08026	9.27439	8.2506	8.39943	9.20105	8.95606	9.11772	9.19697	9.54766	9.68143	9.88622	9.41043	9.38185	8.95555	4.00157	8.83115	9.06611
COBS01899	7.0025	7.93029	7.80596	8.84084	9.07497	7.171	8.82879	8.65929	8.31587	6.992	7.4858	7.9079	7.90898	7.74193	7.86896	9.8066	9.193	9.2717	9.65612	9.88056	8.22294	4.62267	8.09895	8.88021
COBS01900	7.12553	8.15981	7.90928	8.29024	7.99681	7.29099	7.10887	7.17921	7.11656	7.18982	7.32986	7.47005	7.38018	7.31415	7.98127	8.97526	8.76473	8.79566	8.34369	8.03185	7.05998	4.00157	8.25026	7.73351
COBS01901	10.7975	10.9456	10.7634	11.0064	10.9125	10.7799	11.3191	11.3205	11.4445	11.0914	11.3058	11.095	10.6187	10.6044	10.6066	10.6371	10.8819	10.4359	11.216	11.2263	11.3936	11.8342	11.2395	10.987
COBS01902	10.0893	10.064	10.5423	10.3463	9.81609	10.8178	9.12912	8.69332	8.81325	9.74859	10.0948	9.37849	10.1067	9.93402	10.3218	10.6013	10.4408	10.7487	9.47224	9.49447	9.11204	9.22862	10.281	9.78341
COBS01903	11.4777	10.9563	10.9749	10.8112	10.9746	11.4879	11.3466	11.6651	11.5558	11.7361	11.3865	11.4074	11.0146	11.4277	11.0078	11.3686	11.26	11.466	11.4394	11.4076	11.7284	10.7433	11.1755	11.2316
COBS01904	9.89059	9.17376	9.45274	8.98985	9.21973	9.16807	9.49141	9.42393	9.68793	9.62529	9.43665	9.81853	9.83392	9.72784	9.31221	9.4354	9.4758	9.52385	9.5275	9.60329	9.59536	9.99956	9.72159	9.90698
COBS01905	6.91817	7.58145	7.42315	7.18397	6.84038	7.55281	7.35992	7.30011	7.51462	7.5177	7.92675	7.10795	7.13839	7.16817	7.5636	7.34212	6.97961	7.54051	6.98311	7.24748	7.28954	4.97278	7.30968	7.39161
COBS01906	10.1054	9.46735	9.7344	9.34304	9.5752	9.69316	9.7095	10.3452	10.0163	9.77369	9.47408	10.1333	9.74365	10.027	9.88598	9.7056	9.61904	9.66748	9.71372	9.70176	9.99224	9.01805	9.18078	9.69791
COBS01907	9.5871	8.32221	8.93028	7.85793	8.70798	7.75022	8.9171	9.30583	8.90912	8.89462	8.33296	9.15133	8.78052	9.19062	8.82227	8.26059	7.99415	8.28776	8.1002	8.03185	8.83655	10.5509	8.26251	7.94948
COBS01908	11.8683	12.0908	13.2649	10.6251	10.1474	9.41948	11.0032	10.7595	11.1704	10.1489	10.4821	10.8451	12.4673	13.305	12.2471	10.8148	10.9855	10.3479	11.6416	11.5898	10.7732	10.2052	10.7164	11.142
COBS01909	4.00157	6.05959	5.57248	5.96082	5.84718	4.00157	6.05308	6.3906	6.70167	6.022	6.2109	6.1687	5.67034	5.85523	5.57645	5.86222	5.87429	5.46854	5.97405	6.1948	6.12271	7.87311	6.08708	6.04467
COBS01910	5.01193	5.95112	5.45337	5.59073	5.41113	4.00157	5.40469	5.54801	5.29847	5.94014	5.47464	5.79404	5.71645	4.97491	5.45709	5.2614	5.32412	5.63795	5.40639	5.52611	5.32561	6.71374	5.7048	5.95661
COBS01911	9.07104	8.39214	8.2453	7.96147	8.69362	8.92754	8.53111	8.58146	7.94896	10.0009	9.41115	8.79874	8.41306	8.12653	7.98127	8.30784	7.98806	8.18971	8.16893	8.10793	8.18234	9.36357	9.34792	8.5585
COBS01912	10.5786	10.9653	10.6292	10.8358	10.7736	10.1873	10.2096	10.3946	10.3357	10.9159	11.0199	10.4774	11.0021	10.3801	10.6168	10.5764	10.8868	10.5687	10.4642	10.477	10.3312	11.3193	11.4567	10.4542
COBS01913	11.6311	11.6641	11.3091	11.9268	12.2703	11.3902	11.8546	11.9532	12.1671	11.8611	11.6905	11.9452	11.6322	11.362	11.5503	11.6775	11.6289	11.5638	11.6407	11.6919	12.014	11.8954	11.6959	11.5093
COBS01915	8.51486	9.15954	9.44591	9.41203	9.4356	9.62543	8.56797	7.68082	8.27171	8.33566	8.70278	8.16253	9.46999	9.46259	9.40953	9.52457	9.42058	9.49878	8.56361	8.68623	8.1616	8.01496	8.55914	8.42359
COBS01916	8.2148	8.52698	7.59877	10.7563	12.0395	10.3513	11.3382	10.6972	11.3447	9.03513	8.59355	10.1791	7.34041	7.48386	7.88264	10.7925	11.2173	10.3063	11.3789	11.2792	10.7596	4.44244	8.15703	9.7663
COBS01918	5.44388	4.54097	4.83614	4.57651	5.28094	5.31079	5.88495	5.28301	4.64053	5.42	4.62456	5.50469	4.87008	4.7611	4.00157	4.46911	4.45613	4.56086	4.62923	4.63505	4.367	4.44244	4.41045	4.56146
COBS01919	12.7749	13.1506	12.7746	11.3704	11.7366	11.2524	12.0064	10.8322	11.5901	10.8067	11.2494	10.4774	12.3696	12.8649	12.6663	9.4176	9.84551	9.72764	10.1026	10.5392	10.9373	11.5951	10.3365	10.1985
COBS01922	7.34337	7.94368	7.35617	6.57758	7.63131	5.14457	8.113	7.49932	8.26171	6.56582	7.5102	7.09832	7.16908	7.12126	7.08148	4.99619	5.3907	5.19987	5.86898	6.2426	6.71448	4.00157	6.01732	5.87822
COBS01923	7.11478	7.17653	5.68037	9.09342	10.2441	8.09235	11.6552	11.2314	11.9088	9.61915	9.51654	11.4607	6.57203	6.17805	6.31843	8.6548	9.31431	7.70901	10.7701	10.9968	11.3886	11.0206	8.31051	10.5437
COBS01928	9.07378	10.5085	9.04321	12.3525	13.3664	10.8588	12.1152	11.0944	11.7036	9.18827	9.90236	10.4204	8.85706	8.80214	9.80783	11.8195	12.142	11.5397	11.5945	11.7564	11.2517	10.2235	8.84614	10.2915
COBS01929	4.00157	4.84726	4.53377	5.25583	5.48993	4.00157	4.92743	4.60994	5.34422	6.09893	5.58241	4.48445	4.00157	4.00157	4.7521	4.92491	5.22814	4.86071	5.44638	5.0822	5.45065	4.00157	4.62342	4.78856
COBS01930	7.90457	8.64208	7.86884	9.13594	9.14785	8.26835	8.68764	8.38296	8.42291	7.23926	6.38488	7.85218	7.68489	7.63542	8.13761	8.65885	9.19037	8.88922	8.66212	8.99467	8.56027	4.00157	6.40432	7.67833
COBS01931	9.55016	9.56986	10.2592	8.97266	7.9308	8.08295	9.60963	9.62049	9.28674	9.62222	9.25507	9.81273	10.5368	10.7459	10.1523	8.97201	8.56102	9.00201	10.224	9.90438	9.23844	10.2647	9.83986	10.2053
COBS01932	7.97104	8.48647	8.32204	8.47966	7.93693	7.4167	6.30953	7.36967	7.56451	8.14311	7.15456	8.12076	8.68925	8.59708	8.34416	8.77347	8.68254	8.76199	8.17922	7.97879	7.45303	7.92796	8.66899	8.25459
COBS01933	6.20064	6.45974	6.3131	4.66402	4.81061	4.00157	5.95491	5.32512	4.64053	5.75833	5.35526	4.34381	6.72637	6.78084	7.1964	4.80452	4.64182	4.61349	6.16126	5.6826	4.88522	4.44244	5.65085	5.43281
COBS01934	9.68539	9.71502	9.82838	8.47966	7.89977	8.82446	8.61905	8.46015	8.50145	9.90572	9.35876	8.69838	9.78338	9.51432	9.59058	8.1583	8.33562	8.19454	8.5359	8.20732	8.1926	8.39783	9.93267	9.03787
COBS01935	8.92371	9.58484	8.58115	9.87253	9.56931	9.84214	8.57316	8.85837	8.45835	9.19241	9.00525	8.93326	8.92973	8.76239	8.9796	10.0063	9.70195	10.3624	8.59465	8.80756	9.06824	9.45011	9.31013	8.74282
COBS01937	5.51965	4.92543	4.53377	4.33497	4.88559	4.00157	4.00157	5.14499	4.00157	5.20178	5.93575	4.34381	4.44071	4.62407	4.8384	4.54066	4.58682	4.35662	4.72447	4.45129	4.81027	8.66266	4.66564	4.83505
COBS01938	9.61936	9.71891	9.89839	9.11596	9.24209	9.12763	8.94937	9.36398	9.31114	9.39659	9.18155	9.13048	10.132	9.92506	9.67324	9.35413	9.32518	9.29429	9.22722	8.85728	9.15454	9.40589	9.75875	8.99702
COBS01939	8.27813	8.34758	8.07829	9.07743	9.20463	8.84678	8.59883	9.0517	8.48006	10.3588	9.95624	8.48848	7.84442	7.44646	8.30921	8.63643	8.51742	8.78293	7.44536	7.77583	8.6743	4.62267	8.67205	8.03628
COBS01940	4.00157	5.28755	5.27122	5.25583	5.32615	4.33945	5.88495	5.67536	5.65422	5.27975	5.0648	5.79404	4.96909	4.87534	5.16953	5.2614	5.32412	5.15144	5.36487	5.6826	5.84648	4.44244	5.23884	5.28059
COBS01941	7.05977	8.08329	7.7698	8.81351	8.23404	6.16397	7.4872	7.80478	7.28547	6.76149	7.75416	7.19181	7.22853	7.45903	7.92952	8.29747	8.23401	8.4658	7.21304	7.4375	7.4183	6.23575	7.76977	7.88355
COBS01942	8.01179	8.98655	8.30702	9.25239	9.12129	9.2603	9.40974	9.13572	9.60552	8.46482	8.21977	9.39218	8.93415	8.84082	8.88457	10.2192	9.91507	10.0643	10.0051	10.3229	9.32935	4.00157	8.59991	9.31066
COBS01943	8.96863	8.52698	8.55173	9.06822	9.44847	9.09071	9.29206	9.07768	9.31838	8.36538	8.83341	8.81626	8.70487	8.72669	8.77554	9.001	9.1771	9.12057	9.06233	9.16814	9.24583	8.08897	8.41298	8.6226
COBS01944	8.78323	9.39876	9.66555	9.66059	8.87638	9.31133	8.66351	8.72985	8.92186	8.80539	8.82378	8.76606	9.4516	9.27774	9.57389	9.9364	10.028	9.98046	10.028	9.78497	8.8102	4.44244	9.63019	9.18904
COBS01945	7.93517	8.18255	8.4137	8.14847	8.48422	6.89506	7.83844	8.0083	8.4972	7.68093	8.08074	8.08741	8.51705	8.28244	8.28885	8.71244	8.56102	8.40264	8.14289	7.91428	8.05878	4.00157	8.43299	7.75418
COBS01946	11.72	11.4165	11.8283	9.99545	9.38514	9.58951	9.90712	10.0179	9.72289	10.0497	10.3807	10.0018	12.0682	12.1243	12.1346	10.5608	10.4507	10.7286	10.6444	10.4928	9.7084	8.70503	10.4198	10.7378
COBS01947	9.30146	9.41322	9.77672	9.50714	9.13994	9.86963	8.99646	9.56097	9.82636	9.50385	9.70144	9.59002	9.71054	9.88633	9.64754	9.57147	9.6587	9.78539	9.44911	9.50073	9.49146	9.2994	9.99566	9.74387
COBS01948	10.8424	9.55472	9.81608	8.47966	8.69362	9.77395	8.10584	8.94281	8.5267	8.64516	8.45047	8.83643	10.243	10.1647	10.2825	8.78092	8.80153	9.04129	8.59465	8.30386	9.00866	8.60789	8.45983	8.40026
COBS01949	5.36249	6.05959	6.39398	5.70102	5.59862	6.30558	5.77203	5.61342	6.03054	7.81662	7.90857	4.83041	6.25817	6.35586	6.37963	5.73434	5.51272	5.93023	5.62733	5.43899	5.32561	4.00157	6.27636	5.84544
COBS01950	6.11356	7.13002	6.79827	7.95145	6.33192	6.5643	6.76638	5.14499	5.84223	4.00157	5.68094	6.06946	6.06816	6.17805	7.23986	6.81172	7.18165	7.39642	6.6484	6.56127	5.92799	4.00157	6.10634	6.63033
COBS01951	10.4663	11.8345	11.4448	12.0309	11.0018	11.089	10.0496	9.91652	10.1508	10.0588	10.1186	10.0617	11.1308	11.1408	11.616	11.1637	11.2359	11.3699	10.5791	10.6504	10.189	10.8497	11.0655	10.7527
COBS01952	5.31935	4.54097	4.65157	4.57651	4.95404	4.00157	4.00157	4.78321	5.09127	4.00157	4.00157	4.00157	4.75649	4.44343	4.7521	4.80452	4.37323	4.43587	4.62923	4.32021	4.51701	4.00157	4.47319	4.68519
COBS01953	6.53418	8.397	7.89592	10.7875	8.26355	9.5862	9.1256	9.04645	8.33029	8.30531	8.68159	9.73817	7.07491	7.28614	7.89619	9.63548	9.69266	9.96998	8.50355	9.54385	8.96752	4.00157	8.78241	11.2862
COBS01954	11.9323	11.3966	11.666	10.33	10.1329	10.7298	11.9822	12.3738	12.2463	11.8932	11.8268	13.2868	11.564	12.1752	11.4916	11.1849	10.9675	10.8248	12.1669	12.3453	12.2983	11.8235	11.1595	13.3064
COBS01956	9.9485	10.7024	11.08	11.4479	11.7159	10.4456	12.2627	12.3383	12.2514	11.1113	11.34	11.599	10.5598	10.9835	11.0109	11.788	11.9968	11.9052	12.4138	12.4665	12.3057	11.6202	11.6778	12.5491
COBS01957	4.72315	5.86318	5.49449	5.87255	6.7154	5.84768	6.52435	7.8897	7.20354	6.61742	6.53884	6.50449	5.57231	5.58125	5.61361	6.0055	6.37366	6.10366	6.38144	6.76712	7.22047	4.00157	6.3258	6.36937
COBS01958	7.92301	8.18255	7.35617	8.25405	11.4985	8.19181	7.71192	7.14977	7.64397	7.95039	8.31929	7.54951	7.41886	7.48386	7.41096	10.7328	7.94158	10.1479	7.93991	7.59328	7.69682	4.00157	7.38687	7.37564
COBS01959	12.5566	12.5879	12.1559	12.9287	13.4837	12.6444	13.8039	13.2553	13.6316	12.7136	12.9495	13.0593	12.3528	12.4157	12.2006	12.4128	12.4856	12.2882	13.1435	13.2416	13.4094	13.4464	12.6622	12.9136
COBS01960	9.33614	9.40842	9.13665	8.10396	7.71941	7.70798	7.61415	7.68082	7.23483	7.23926	8.09687	8.01321	10.1126	10.33	10.0337	8.63643	8.77534	8.90987	8.3931	8.45376	8.24281	4.00157	8.82704	8.53964
COBS01961	6.58255	7.80374	7.0989	7.61249	6.12349	6.59172	5.40469	6.01534	5.20034	8.2743	8.45047	6.77327	7.35379	6.65333	7.15155	7.0806	6.8631	7.24072	6.52147	6.49812	5.69732	4.44244	9.0575	7.63884
COBS01962	8.01752	9.37925	9.02499	7.792	6.14589	7.11627	6.6507	7.05757	5.95326	7.8902	7.18533	6.60468	9.22143	8.98592	8.92466	7.30089	7.80969	7.65737	7.9817	7.84673	6.95406	7.80634	8.97565	8.50847
COBS01963	12.3677	12.1456	11.8573	12.5893	13.2703	13.0146	13.1672	13.2595	13.45	12.6137	12.4398	13.1002	12.2184	12.1528	11.986	12.9956	13.0742	12.7439	13.2273	13.0947	13.3222	12.3546	12.1956	12.6421
COBS01964	11.0764	10.8336	10.5402	11.1344	11.5144	12.033	11.3713	11.4131	11.6015	11.2508	11.0283	11.2802	10.6844	10.4996	10.5745	11.1512	11.2834	10.9822	11.1261	11.3628	11.352	11.6909	10.7127	10.8215
COBS01965	11.1327	10.7611	11.0763	10.7186	10.4713	11.3624	10.3231	10.4953	10.572	10.9371	10.7264	10.6516	10.6593	10.7447	10.9468	10.658	10.7065	10.6903	10.5877	10.3378	10.3381	11.107	10.8005	10.453
COBS01966	11.1274	10.63	10.2488	10.9118	11.3982	11.0147	10.5595	10.6003	10.767	11.3808	11.0594	10.5765	10.2087	10.4221	10.488	10.5024	10.7208	10.5383	10.1607	10.0673	10.6999	12.1177	11.088	10.104
COBS01968	11.2669	10.4207	11.1552	10.5074	9.91988	9.93874	12.7611	12.9883	13.158	12.2111	12.1695	13.9611	11.0967	11.5442	10.3721	10.5549	10.4796	10.4252	12.3228	12.629	13.1394	12.7721	11.9781	13.9016
COBS01969	11.0049	10.7383	10.3264	10.4963	10.4682	10.3017	11.221	10.7344	10.531	10.5517	10.8853	10.6709	10.3125	11.0261	10.2915	10.2657	10.4441	10.4814	10.5025	10.8513	10.5187	9.24664	10.6925	11.0021
COBS01970	5.07063	6.36013	5.8105	6.72913	5.23364	4.00157	5.81083	5.86992	5.20034	4.79992	6.5865	5.28722	6.45002	6.26994	5.93278	5.92151	6.1649	6.04842	6.43567	6.69069	5.36893	4.00157	6.21626	6.48596
COBS01972	4.36517	4.92543	4.53377	5.03593	5.92872	6.50773	4.59308	6.12499	5.87093	4.91966	4.87603	5.32668	4.87008	4.62407	4.65334	4.99619	4.86276	4.82511	4.95071	4.99172	5.56291	4.00157	4.93277	4.73885
COBS01973	5.51965	4.92543	4.65157	5.25583	5.84718	5.6672	5.84845	6.14585	5.84223	5.94014	5.22066	5.74155	4.00157	4.00157	4.53523	4.38387	4.45613	4.70643	4.36585	4.63505	5.41056	8.7763	4.84358	4.62658
COBS01974	5.44388	5.38358	5.74719	5.93933	5.63268	4.00157	6.28338	5.99224	5.95326	4.79992	5.22066	5.71442	5.46512	5.52868	5.61361	5.81582	6.02154	6.0708	6.02347	6.37645	5.66513	4.00157	5.63697	6.31283
COBS01975	7.18836	7.61541	7.85511	7.54724	7.24156	4.00157	7.82104	7.30899	6.70167	6.66714	7.1231	7.19181	7.59789	7.5203	7.86896	7.84215	7.82002	7.9453	7.41066	7.4636	7.1046	4.00157	7.20259	7.22906
COBS01976	8.10618	8.24331	8.44605	8.79686	8.13104	8.64817	7.6929	7.90143	7.70449	7.90041	8.01434	7.90242	8.245	8.5097	8.58434	8.76598	8.61914	9.14316	8.03935	8.11205	7.56039	4.00157	8.49486	8.10854
COBS01977	8.48216	9.10118	8.97841	8.8756	8.9687	8.70122	8.28119	8.21488	7.94896	8.06367	8.20497	8.45529	8.98192	9.12557	9.27911	9.03098	9.13105	9.17517	8.76117	8.69172	8.32434	4.00157	8.34741	8.37654
COBS01978	10.4526	10.6403	10.4891	10.222	10.223	10.4272	10.0791	10.2797	10.2462	9.96987	9.75815	10.0568	10.7245	10.807	10.5178	10.7758	10.8055	10.6933	10.7332	10.5154	10.3346	4.44244	10.4628	10.3041
COBS01979	6.85465	7.19922	7.14517	6.71712	7.43681	7.04961	6.69035	7.50704	6.84508	6.42755	6.84219	7.22753	7.22853	7.49611	7.28202	7.04968	7.09288	7.23128	6.98311	6.81924	7.37364	4.00157	6.7344	6.91035
COBS01980	9.58325	9.1248	9.05821	9.00924	9.57324	10.1938	9.23432	9.50847	9.56755	10.0497	9.45549	9.53822	9.24653	8.9598	9.10406	8.9573	9.12553	9.2148	8.90422	8.89585	9.73314	9.9953	9.34505	9.06117
COBS01981	12.7943	13.0616	12.839	14.1134	14.2398	13.9261	13.383	12.8809	12.9675	14.1216	14.2872	13.4019	12.5963	12.1747	13.1346	13.8576	13.4221	13.622	12.9085	12.8039	12.8409	15.0688	14.0185	13.4671
COBS01983	8.93884	9.31396	9.40894	8.14408	7.39271	7.80849	7.07964	7.56736	7.31501	8.28989	8.4876	7.62477	9.695	9.66731	9.48515	8.51654	8.56714	8.95028	8.18434	8.05339	7.52822	4.00157	8.55748	8.6023
COBS01984	8.71454	7.7665	7.68684	7.58024	8.50905	9.4991	8.26844	8.96804	8.97171	8.52529	7.4858	8.85915	7.77681	8.3777	7.72444	7.84215	8.01225	8.12294	8.12703	8.00114	8.47049	10.5052	7.27353	7.4282
COBS01985	4.72315	4.66032	4.37895	6.36082	4.88559	7.61953	5.01248	4.92207	4.00157	5.42	5.22066	4.83041	4.00157	4.7611	4.37999	4.88682	4.45613	6.6534	4.51538	4.32021	4.63121	4.00157	5.56497	5.10156
COBS01986	8.65713	8.67849	8.62619	9.83772	11.2645	9.51486	9.63463	8.75584	9.61731	8.21021	8.43788	8.82494	8.64134	8.85506	8.74227	10.5571	10.4099	10.4092	10.0959	10.255	8.28655	8.197	7.38687	8.77137
COBS01988	4.80628	4.38409	4.37895	4.00157	4.00157	5.04931	4.00157	4.00157	4.00157	4.00157	6.01026	4.00157	4.00157	4.00157	4.00157	4.60343	4.00157	4.25294	4.00157	4.63505	4.00157	4.00157	5.33475	4.92028
COBS01989	4.51443	4.54097	4.00157	5.13009	4.36716	4.00157	4.00157	4.78321	4.00157	5.3522	4.62456	5.20339	4.00157	4.00157	4.00157	4.38387	4.45613	4.78773	4.80775	4.32021	4.72674	4.62267	5.29745	5.54516
COBS01990	4.00157	10.3117	4.53377	4.57651	4.95404	4.75039	4.00157	4.85579	4.00157	5.75833	4.87603	4.89485	9.12029	8.14987	4.00157	4.00157	4.00157	4.43587	4.36585	4.63505	5.07583	4.00157	4.98721	5.38445
COBS01991	6.77438	7.06964	7.69459	9.16433	8.3623	8.41392	6.33517	4.98335	6.47183	6.20639	6.88056	6.59081	6.74707	7.08908	7.92291	8.94575	8.39652	9.08472	7.22311	7.37695	6.52796	5.67629	6.7344	7.02483
COBS01992	5.83823	5.76851	4.75006	6.06315	5.01729	4.00157	5.81083	5.2391	5.58432	5.54418	6.43818	5.91622	5.76085	4.7611	4.8384	4.88682	4.7389	5.93023	5.27658	5.20316	4.88522	4.00157	6.41949	6.04467
COBS01993	10.5513	11.0409	10.6039	10.9449	10.8953	10.8697	10.6664	10.4622	10.6562	10.344	10.4418	10.347	10.7498	10.5427	10.66	10.459	10.5378	10.3063	10.2203	10.3944	10.6035	10.8961	10.3542	10.1659
COBS01994	8.83268	7.67296	8.11329	7.33133	8.3208	8.76122	7.77658	8.08738	8.1194	8.81079	8.06443	8.29358	8.01329	8.16522	7.80573	8.09981	7.78881	7.98765	7.96394	7.95608	8.11921	9.12718	7.93744	7.76643
COBS01995	7.98281	7.99604	7.00151	8.95026	9.07774	9.07189	10.5318	9.60271	10.4878	8.79451	9.06372	9.25126	6.95641	6.56123	7.37252	8.60947	9.24225	8.34959	10.0932	10.3647	9.62588	11.0609	8.78665	8.98489
COBS01996	7.71288	7.0941	7.55686	6.62998	4.51723	4.00157	5.08996	4.98335	4.37248	10.2967	10.4355	8.31019	6.45002	5.35425	5.45709	5.64695	4.86276	6.41081	5.40639	5.84239	5.32561	9.63113	10.877	9.39557
COBS01997	4.00157	4.99675	4.53377	5.13009	5.13166	4.00157	5.98848	5.51384	5.97955	5.70832	6.01026	5.59925	4.44071	4.00157	5.11245	4.96131	5.20265	5.04643	5.22942	5.24034	5.32561	4.00157	6.35776	5.84544
COBS01998	8.56256	8.85495	8.82889	8.97759	8.96572	8.97137	8.82445	8.44023	8.36806	8.26645	8.57067	8.34283	8.52881	8.9816	8.92795	9.03098	9.03869	9.1885	8.76799	8.73759	8.15637	9.26444	8.88359	8.48402
COBS01999	9.80077	9.77222	9.50623	8.26217	7.71941	9.35284	8.28119	8.52964	7.52306	9.00245	9.08	8.4775	9.51199	9.81048	10.0802	10.0715	9.52689	10.4809	8.86977	8.77429	8.83982	9.83067	10.1831	9.56458
COBS02000	11.1287	11.8246	12.6689	9.85255	9.91833	9.96319	10.349	10.6444	10.2849	10.7836	10.6136	11.2305	11.843	12.076	12.6368	9.65384	9.41381	9.50751	10.1607	10.1553	10.868	10.3671	10.8783	11.2367
COBS02001	10.2806	9.82002	9.97941	8.19164	8.65707	9.24988	9.50232	10.0563	9.63481	9.64659	9.39823	9.76846	10.2572	10.6742	10.3379	8.6849	8.93053	8.83011	9.26626	9.35097	9.82314	9.19559	9.15367	9.01077
COBS02003	7.51593	8.31194	8.60589	8.38621	7.5129	7.88084	7.4872	7.02543	6.95001	6.36801	7.64842	7.47746	8.30779	7.76231	8.55908	8.46656	8.18702	8.5862	7.9031	7.71212	7.59186	4.44244	8.61591	8.00907
COBS02004	8.2541	8.30677	8.08418	7.74048	8.02583	6.12604	7.87262	7.67399	6.97505	7.28703	7.64842	7.22753	8.46905	8.49764	8.07948	8.09981	8.69936	8.35175	7.85249	8.2188	7.4183	4.00157	7.42028	7.53742
COBS02005	10.1837	9.9162	9.71749	9.21739	8.98057	9.53388	9.43273	9.05432	8.75393	9.65862	9.39173	9.10459	9.81487	9.63193	9.78444	9.12175	9.09198	9.20648	8.97958	8.8863	8.89415	10.8103	9.96545	9.447
COBS02006	11.9179	12.4322	12.3548	13.4517	12.8951	12.4538	12.5401	12.1575	12.4653	12.4277	12.6908	12.2515	12.0347	12.0039	12.3187	12.8335	12.7838	12.7276	12.4338	12.679	12.2419	13.2822	12.8506	12.5391
COBS02008	9.03489	9.9984	8.11904	10.4911	11.318	9.89794	12.3419	12.0564	12.482	10.563	10.5214	11.2419	9.15101	8.11866	8.66941	9.86379	10.3968	9.58376	11.702	11.9257	12.3699	11.2988	10.5178	11.1583
COBS02009	9.95595	8.876	8.71982	8.70169	9.09149	10.3107	9.01181	9.44204	8.98086	9.7173	9.49243	9.5294	8.8097	9.12948	8.93123	8.86919	8.97262	9.06119	9.02298	8.85972	9.4061	11.284	8.89018	8.96031
COBS02010	9.15374	8.50912	8.78625	8.65008	9.35355	9.63668	9.03455	9.60271	9.39113	9.27681	9.07188	9.62686	9.01986	8.73698	8.62548	8.95071	8.6863	8.64546	8.51982	8.78718	9.87487	10.792	8.72755	8.51573
COBS02011	8.3479	8.30677	7.98687	8.04394	8.63093	8.04958	8.27483	7.67399	7.81834	7.58271	7.99724	7.89693	8.25212	8.30339	7.88264	7.99455	7.96036	7.94817	7.68168	7.83682	7.5444	4.00157	7.91688	7.75418
COBS02012	6.04418	4.76009	4.75006	6.34505	6.33192	4.99763	7.82976	7.78591	6.41707	8.62689	9.86998	6.92351	5.05767	5.06398	4.8384	6.46813	6.84953	6.54141	7.09731	7.34919	7.33688	4.00157	6.50707	7.30425
COBS02013	10.0729	8.8864	8.93028	8.43728	9.39183	10.017	9.26668	9.65884	9.63867	10.0678	9.46171	9.73664	9.58407	9.72526	8.47152	8.80305	8.63865	8.94028	8.71955	8.59242	9.53633	11.2691	9.39312	8.96738
COBS02015	6.13588	6.20688	5.89973	6.76455	6.31249	4.00157	7.59376	8.00287	8.05711	7.72761	7.15456	8.11604	5.34641	5.72605	5.68457	7.43548	7.35829	7.26866	7.52858	7.45061	7.82132	4.00157	7.64385	8.10533
COBS02016	10.7867	11.2084	10.4141	11.6314	12.4018	10.795	12.3592	11.9851	12.0571	11.8913	12.131	11.7621	10.7585	10.9911	10.8207	10.8682	10.9536	10.6057	11.098	11.4076	11.7898	12.7169	11.7906	11.5166
COBS02018	6.04418	6.70503	5.92811	7.40702	8.98353	5.87142	8.60898	7.95305	8.00406	7.84862	8.09687	7.6642	5.80368	6.11301	6.06607	6.58669	6.58757	6.40221	6.22504	6.82943	7.66761	6.10891	7.23642	7.18685
COBS02021	4.00157	5.76851	4.91335	6.32909	6.4069	4.00157	7.59376	6.3733	6.19462	6.24033	6.80273	6.22481	5.13829	5.41553	5.64962	5.2614	5.5506	5.39289	5.81293	5.70676	5.41056	8.75125	6.10634	6.47577
COBS02023	5.51965	5.42853	4.53377	6.36082	6.16791	4.00157	6.82078	5.76259	6.03054	4.91966	5.0648	5.53709	5.05767	4.7611	5.05165	5.2614	5.03355	4.86071	5.36487	5.58066	5.78899	4.44244	5.35292	5.91017
COBS02024	5.44388	6.53444	5.74719	7.89503	7.54545	4.00157	7.60399	6.44123	7.01179	6.06104	6.95426	6.76101	5.71645	5.72605	6.09114	6.0323	6.43039	5.72889	6.538	7.19374	6.8787	4.00157	7.10515	7.35405
COBS02026	4.00157	5.59206	4.65157	6.00275	5.01729	4.00157	5.64749	4.98335	4.52469	4.79992	4.00157	4.48445	4.96909	4.7611	5.4983	5.02971	5.30095	4.95872	5.66034	5.92515	5.1835	4.00157	5.15492	5.72324
COBS02027	4.80628	5.28755	4.83614	5.17383	5.07627	6.41819	5.50816	4.85579	4.64053	6.66714	6.1474	6.08992	4.75649	4.44343	4.9158	5.02971	4.89988	4.74829	4.80775	5.0822	5.32561	4.00157	5.87662	5.72324
COBS02028	7.98281	7.90312	8.10172	7.47184	7.76151	8.24749	6.60987	7.04694	6.93732	7.76164	7.30211	6.90143	7.93578	7.80222	7.86896	7.5886	7.57356	7.85664	6.83248	6.80897	7.1898	4.00157	7.71418	7.14964
COBS02029	10.7469	10.9154	10.9429	10.7973	10.5025	10.714	10.2905	10.6313	10.4641	11.8295	12.4367	10.6979	10.8906	10.9162	10.9468	11.4276	11.2502	11.5173	10.7565	10.7091	10.6543	11.3948	11.8179	11.0297
COBS02030	6.30195	6.91312	6.95014	6.71712	5.56353	5.74787	6.36032	6.40769	6.32054	6.27342	6.1474	6.06946	7.55231	7.36857	6.71371	6.64649	6.37366	6.96635	6.50474	6.70187	6.05311	4.00157	6.70414	6.93986
COBS02031	10.215	10.6145	10.4946	10.0267	9.80279	9.71455	9.7649	9.88599	9.89412	10.1785	9.92505	9.7397	10.5015	10.4752	10.4278	10.2389	10.272	10.28	10.1386	10.2203	9.51814	10.6271	10.861	10.2552
COBS02032	10.0213	10.2242	9.53867	10.8426	11.4583	11.1128	9.62218	9.3233	9.20317	7.66901	7.7744	8.86196	9.23224	9.48717	9.97449	10.0723	10.3609	10.1991	8.38868	8.56274	9.43871	4.62267	7.68097	8.16506
COBS02034	7.18836	7.56417	7.59877	6.13952	6.29278	6.33873	5.77203	5.76259	5.29847	6.48456	5.35526	6.00603	8.13382	8.52761	8.00646	7.26916	7.36303	7.15841	7.60719	7.48923	6.25164	4.00157	6.4785	6.8258
COBS02035	4.00157	4.00157	4.37895	4.66402	5.07627	4.00157	4.72355	5.19318	4.37248	4.00157	5.47464	4.95444	4.00157	4.44343	4.00157	4.54066	4.26473	4.56086	4.62923	4.7744	5.01687	4.00157	4.66564	4.56146
COBS02036	8.28763	9.78895	7.9994	11.5415	12.9297	10.6779	13.4055	12.2351	12.7757	10.0542	10.7622	11.5278	8.23067	8.16522	8.44877	10.0783	10.6772	9.52767	11.6513	11.9216	12.0118	11.1545	9.04928	10.5919
COBS02037	9.53033	8.44948	9.46179	7.97142	9.78936	8.55289	9.07166	8.87625	9.08077	8.62689	9.01375	8.83643	9.2394	9.49325	9.39059	8.65682	8.80671	8.1678	8.87925	8.91945	8.67795	9.09967	9.01715	8.96208
COBS02038	10.5621	10.1911	9.76031	10.0723	10.3813	10.7741	9.78291	9.85629	9.90217	10.753	10.397	9.98769	9.83628	9.55847	9.82203	9.81296	9.7038	9.84627	9.38184	9.44496	9.93399	8.01496	10.4782	9.79238
COBS02039	13.0807	12.0123	13.959	10.1143	10.5391	9.56112	9.76942	9.75693	10.4793	9.99143	10.0787	9.73358	13.1195	14.1421	13.579	11.4178	11.4132	11.6964	10.8119	10.7745	9.90629	8.86304	10.6895	10.5844
COBS02040	10.9275	10.8664	11.0131	10.9341	10.528	10.1508	12.1363	12.5614	12.8558	11.8532	11.6865	13.9609	10.8826	11.3258	10.7803	10.8899	11.0115	10.633	12.4809	12.5331	12.6187	11.8162	11.694	13.9533
COBS02041	7.61781	4.76009	4.9838	4.98486	7.48799	4.33945	5.29025	7.76679	7.12773	5.65612	4.00157	6.96665	4.87008	5.06398	4.98643	5.28685	4.86276	4.86071	5.22942	4.70844	5.66513	4.44244	4.87445	4.73885
COBS02042	13.4453	13.4144	13.6778	13.7032	13.5737	13.5519	13.7367	13.4246	13.7141	12.91	13.038	13.1729	13.4164	14.16	13.4902	13.5871	13.7214	13.6199	13.7443	13.8537	13.5616	14.0185	12.9477	13.4907
COBS02044	8.1008	8.74865	9.28178	7.65025	6.87966	7.8479	7.04978	7.32659	6.60786	8.16018	7.89016	7.4626	9.25715	8.97292	8.49392	8.20066	8.09666	8.18244	7.92775	7.61087	7.42706	7.94579	8.69932	8.17427
COBS02045	12.4144	12.4029	12.317	11.7581	12.6599	12.5685	12.9207	12.7137	12.7451	13.0268	13.0951	12.8975	12.0108	12.3	12.5148	11.7303	11.9266	11.6943	12.0092	12.4893	12.7941	13.5782	12.7691	12.3591
COBS02046	4.36517	10.2283	12.6557	5.96082	5.07627	4.33945	4.72355	5.14499	4.37248	5.02391	5.68094	4.89485	7.29948	6.2094	11.307	4.65994	5.41201	4.82511	5.22942	5.31083	5.36893	5.81002	5.13275	5.38445
COBS02047	9.76898	13.9866	14.2119	6.39182	4.72705	4.58417	6.54624	5.92029	5.29847	6.69134	6.1474	6.42811	10.2233	11.5573	13.869	4.88682	5.20265	4.86071	6.38144	6.25816	7.78101	4.00157	8.41481	7.24677
COBS02048	7.8733	9.44641	8.97525	9.33154	9.05546	8.94057	8.69241	7.68762	8.09142	6.97256	7.73363	7.13646	8.5052	8.52761	8.94103	8.71439	8.82385	8.97428	8.4019	8.5263	7.73251	4.75941	7.28164	8.51089
COBS02049	5.6896	5.18159	4.9838	5.64717	5.45123	4.33945	4.42128	4.92207	4.00157	4.00157	5.0648	4.68136	4.75649	4.62407	5.11245	4.96131	5.03355	5.29015	4.62923	5.4688	5.07583	4.00157	4.57792	4.56146
COBS02050	6.2823	7.30749	5.8105	7.92608	8.19372	8.09702	7.94666	6.7509	7.2451	6.20639	6.48944	6.36373	7.2139	6.07922	6.06607	7.06213	7.35829	7.24541	6.97116	7.12149	6.63982	4.00157	6.27636	6.64847
COBS02051	5.48241	7.18792	6.0096	8.02496	7.61608	4.00157	7.28536	6.49001	6.70167	5.75833	6.38488	6.42811	6.10181	5.41553	5.93278	6.45857	6.75064	6.4939	6.72213	7.07118	6.29195	4.00157	6.41949	7.02483
COBS02052	4.62807	5.42853	5.10952	6.56416	5.36949	4.33945	6.14427	5.47861	6.67111	4.79992	4.62456	5.24618	5.28168	5.14504	5.11245	5.53266	5.36897	5.01816	5.69245	5.49782	5.72866	4.00157	5.29745	5.52358
COBS02053	10.2841	10.8941	9.49965	11.5845	12.6909	12.3202	12.182	11.9902	12.5438	10.9008	10.906	11.7042	9.78582	9.41536	9.8741	11.3161	11.6019	11.2881	11.3661	11.5043	12.0017	10.7151	9.84461	10.5885
COBS02054	8.91149	9.16239	9.80723	8.46567	8.00266	8.83566	8.41447	8.29695	7.9427	8.49201	8.53566	8.22955	9.25362	9.68334	9.95045	8.83918	8.76295	8.88625	8.63253	8.45376	8.86884	8.51565	8.95444	8.85377
COBS02055	9.14594	8.52254	8.74973	7.86329	7.82241	7.65811	7.6929	7.58933	8.16842	9.65562	9.29047	8.3266	8.93415	8.47936	8.48052	8.02002	8.08531	8.01248	8.29724	7.50187	7.37364	9.63113	9.48295	8.48156
COBS02056	10.29	9.49253	9.73066	9.24423	9.57715	10.4328	8.78922	9.63805	9.53271	10.1296	9.80295	9.60688	10.1755	10.0017	9.8535	9.47035	9.18242	9.34496	9.02298	8.51704	9.22104	10.1603	9.56587	8.94965
COBS02057	9.65092	8.74484	8.79345	8.46567	9.19447	9.92177	8.59374	9.14804	9.22901	9.85696	9.21141	9.1421	9.3193	9.15271	9.12428	8.582	8.42827	8.8743	8.11636	7.94228	9.25562	10.068	8.81324	8.49874
COBS02058	8.93582	10.2805	9.56412	10.0872	9.27379	8.45086	9.22117	8.79711	8.89627	8.25855	9.23341	8.65683	9.80766	9.46878	9.47394	9.42356	9.71026	9.50847	9.3504	9.50542	9.20344	10.4611	9.59275	9.8422
COBS02059	11.5454	11.7676	11.603	12.1935	12.4453	11.4533	12.8682	12.2004	12.3829	11.1681	11.3041	11.6947	11.6274	11.943	11.3164	12.0667	12.2196	11.8326	12.41	12.6441	12.301	11.4672	11.1428	11.8394
COBS02060	7.802	7.46513	7.06317	5.21568	4.51723	4.00157	5.34902	4.85579	5.29847	4.91966	5.22066	5.71442	7.31326	7.31415	7.79853	4.80452	4.52574	4.78773	4.95071	5.88446	4.81027	4.00157	5.88802	5.52358
COBS02061	10.2841	10.1685	10.8066	7.3157	6.89251	7.70798	9.59186	9.51229	9.47342	9.20067	9.37863	9.40187	10.093	10.8818	10.853	8.40274	7.91936	8.54717	10.1864	10.2476	9.55231	8.17453	9.35555	9.94324
COBS02062	10.6195	10.1017	9.57041	8.66239	6.16791	9.0456	6.90695	6.68327	6.9874	10.3952	10.0665	8.44781	10.2816	9.89094	10.7219	6.14646	5.58726	7.98208	6.60217	7.06261	6.96624	8.98406	10.6128	9.18904
COBS02063	10.3467	11.0769	10.5998	10.3135	8.96572	8.48687	10.8727	10.1239	10.582	9.2211	9.40471	10.2169	10.9198	10.9519	11.6502	9.80386	10.1971	9.60741	11.6971	11.675	10.0097	8.94925	10.0798	10.8166
COBS02064	11.0564	13.1513	12.4975	14.0199	13.4637	11.8997	12.5731	11.8372	12.1057	11.631	12.3097	11.7355	12.1	12.1345	12.635	13.1337	13.1616	13.042	12.5208	12.738	11.8569	11.029	12.7093	12.7088
COBS02065	4.00157	4.92543	4.00157	4.87236	5.52733	4.33945	5.01248	5.14499	4.82212	6.022	5.68094	5.36471	4.62026	4.00157	4.37999	4.46911	4.26473	4.25294	4.80775	4.63505	4.00157	4.00157	5.50392	5.38445
COBS02066	5.83823	7.32818	6.41346	8.6987	9.37169	7.4828	8.50961	7.83569	7.65168	6.51219	7.21544	7.6771	6.93863	6.58485	6.49426	6.61264	6.97961	6.48582	6.4878	7.15406	7.5444	8.01496	6.93466	7.12427
COBS02068	4.00157	6.42078	5.22022	7.86863	7.35641	5.48699	7.20664	5.67536	5.38807	5.27975	6.08065	5.84437	5.67034	5.47355	5.16953	5.42776	5.4933	5.75773	5.55836	6.36223	5.7592	4.00157	6.26794	6.49608
COBS02072	4.00157	4.38409	4.37895	4.74063	5.36949	4.00157	4.92743	4.49951	5.38807	4.79992	4.87603	4.83041	4.62026	4.00157	4.00157	4.00157	4.58682	4.25294	4.95071	4.00157	4.88522	4.00157	4.90414	4.83505
COBS02073	7.0485	7.31787	7.41377	7.66876	7.03811	7.05933	6.9881	7.07859	7.27549	6.89193	6.08065	7.20082	7.48108	7.5203	7.3529	7.51859	7.90004	8.06087	7.75937	7.55135	6.7574	4.00157	7.15471	7.48386
COBS02074	11.3675	10.6135	10.6863	10.5829	10.9514	11.1922	11.1042	11.0745	11.1651	11.4264	10.9944	11.2381	10.7232	10.8737	10.7105	10.7222	10.6606	10.6698	10.834	10.5037	11.1111	11.1716	10.9778	10.506
COBS02076	4.00157	5.59206	5.10952	4.80946	4.63148	4.00157	4.92743	4.78321	4.00157	5.65612	5.47464	5.15866	5.05767	5.14504	4.7521	4.92491	5.12191	4.89473	4.72447	4.7744	4.81027	4.00157	5.17658	5.19517
COBS02077	6.67442	4.99675	4.91335	4.57651	5.95476	4.82007	9.76942	6.66934	6.45382	11.2637	11.4567	5.86878	4.00157	4.44343	4.53523	4.46911	4.64182	4.78773	4.95071	6.63338	8.00155	11.0414	4.66564	9.4086
COBS02078	6.24211	6.99357	6.64406	7.30782	8.02007	6.60523	7.82104	7.1298	7.88514	6.3057	6.08065	6.92351	6.92062	6.69716	6.92987	6.81172	6.75064	6.02565	6.80571	6.7777	7.36454	4.62267	5.8535	6.77742
COBS02079	4.00157	4.38409	4.37895	4.74063	4.00157	4.00157	4.42128	4.60994	4.00157	4.79992	4.62456	5.11173	4.62026	4.00157	4.00157	4.38387	4.00157	4.00157	4.62923	4.63505	4.81027	4.00157	4.52828	4.99739
COBS02081	4.36517	4.38409	4.00157	4.57651	4.63148	4.00157	4.83244	5.28301	4.37248	6.89193	7.75416	5.15866	4.00157	4.44343	4.00157	4.60343	4.52574	4.61349	4.51538	4.55127	5.56291	4.44244	5.11005	4.56146
COBS02082	10.1619	9.83621	9.90005	9.87649	9.98022	10.2409	10.281	10.2434	10.4255	10.2298	9.79311	10.1039	10.1204	10.1144	10.0684	10.3094	10.1612	10.0345	10.9739	10.3621	10.2527	6.1418	10.412	10.046
COBS02083	11.4314	10.382	10.921	9.41203	10.433	11.6098	10.4068	10.6242	9.81617	11.8714	11.6878	10.8394	10.7771	10.3751	10.2735	9.45763	9.66916	9.86751	9.27824	9.2317	10.5207	12.2813	10.7949	10.0385
COBS02084	7.0025	9.10415	7.7771	10.5066	10.7496	7.64536	9.98695	8.7429	9.37734	6.69134	7.81404	8.03837	7.59789	7.75216	8.57597	9.67796	10.2258	9.5419	9.6852	9.98703	8.89101	4.00157	7.48832	8.81316
COBS02086	11.1168	10.2527	10.3716	9.79369	9.65697	10.7492	9.77168	9.94502	9.67858	10.3177	10.4228	10.0617	10.5178	10.5846	10.4712	10.1985	10.2918	10.3234	10.0505	9.98368	10.0678	10.064	10.3073	10.2
COBS02087	4.00157	4.54097	4.37895	4.74063	4.81061	4.00157	4.00157	4.85579	4.52469	5.65612	4.87603	4.48445	4.62026	4.00157	4.00157	4.00157	4.26473	4.00157	4.00157	4.00157	4.63121	4.44244	4.84358	4.00157
COBS02088	4.00157	5.18159	4.91335	6.43701	6.97927	4.00157	6.45648	5.36559	5.87093	4.46639	4.00157	5.01005	4.62026	4.44343	4.53523	4.54066	5.14959	4.66171	5.22942	5.77647	5.32561	4.00157	4.87445	5.3338
COBS02089	5.48241	7.64036	6.47026	6.62998	5.52733	6.04668	7.2596	5.99224	5.47076	8.88952	10.2962	5.74155	7.39319	7.65737	6.64986	5.95013	5.80115	5.75773	6.18286	7.17007	5.81807	10.3916	5.95432	8.25748
COBS02090	8.70395	8.98332	9.86807	8.29024	7.8091	8.85231	7.82104	7.7539	7.489	9.04891	9.31818	8.13948	9.61468	9.44074	9.13855	8.44325	8.47027	8.42126	8.30665	8.17233	7.30866	8.00649	9.28737	8.54201
COBS02091	8.55472	8.57928	9.23765	8.64078	8.52942	8.96628	8.38525	8.76547	9.05499	8.98343	8.41236	8.69522	9.07696	9.19436	9.18052	8.89859	8.93685	8.72085	8.85703	8.78204	8.73512	8.66803	8.938	8.37654
COBS02092	9.47747	9.98395	10.7606	9.23603	8.56931	8.99154	8.56797	8.94563	8.97782	8.75019	8.83341	8.84214	10.9604	11.3694	10.5101	10.1185	10.1395	10.3284	9.95821	9.84898	9.24583	4.00157	9.73262	9.69579
COBS02093	8.95381	8.67449	9.04019	8.16156	8.77772	8.14745	8.53111	8.72985	8.37271	9.55623	9.26222	9.05628	8.76073	8.64159	8.65359	8.42195	8.30662	8.40264	7.95198	7.91899	8.27212	9.26798	9.07031	8.48156
COBS02094	11.7296	10.8915	11.1184	9.30237	10.1461	10.1018	10.2999	10.0975	10.2947	10.6929	10.9442	10.7849	10.9572	11.6849	11.1755	9.76498	9.76979	9.78937	10.0986	9.86607	10.4564	10.0558	10.4873	10.6391
COBS02096	12.3284	12.2239	12.7094	11.8046	11.2998	11.6389	10.9945	11.248	11.3058	11.7212	11.4645	11.5001	12.6036	12.7402	12.5781	11.9527	11.7756	11.8969	11.6234	11.4234	11.2687	11.2691	11.8934	11.4932
COBS02098	8.40137	8.66646	7.90928	9.24014	10.1915	8.23907	11.5845	11.3786	11.6323	9.8065	10.0542	11.315	8.5692	8.52761	8.09129	8.6948	8.75939	8.22078	9.94774	10.5053	11.6512	10.4331	9.47334	10.4987
COBS02099	8.23949	8.56638	7.42315	9.12265	10.1748	7.09755	11.3986	11.1699	11.3594	9.71442	9.93403	11.1086	7.89083	7.91566	7.75454	8.51654	8.71782	8.11787	9.87388	10.2925	11.2418	10.3202	9.43784	10.2809
COBS02100	4.00157	4.66032	4.65157	5.17383	5.23364	4.00157	5.60289	5.81743	5.72021	4.91966	5.22066	5.50469	6.86515	6.87879	4.37999	4.60343	4.7389	4.82511	5.07255	5.73045	5.07583	4.00157	4.98721	5.58716
COBS02101	6.06773	5.33666	5.49449	5.64717	5.90213	5.63905	5.92042	5.14499	5.09127	4.91966	5.0648	5.15866	5.46512	4.87534	5.27454	5.35964	5.12191	5.50451	5.07255	5.16451	5.23313	4.00157	5.55001	5.4089
COBS02102	11.2026	10.1224	10.1901	9.76405	10.4994	11.1157	10.2195	10.4293	10.5321	11.0221	10.6052	10.6426	10.2412	10.3112	10.3067	9.97585	9.91107	10.0584	9.6432	9.63782	10.4889	11.1716	10.0998	9.8219
COBS02103	14.0589	13.647	13.5722	13.428	13.798	13.118	13.8569	13.6848	13.7885	13.8809	13.8215	13.6518	13.7419	13.8963	13.5308	13.2251	13.261	12.9809	13.4667	13.5624	13.8204	14.2132	13.6545	13.5216
COBS02104	5.31935	4.66032	4.37895	4.93054	5.18399	4.33945	4.72355	4.49951	4.00157	5.42	5.0648	4.59162	4.75649	4.44343	4.7521	4.75966	4.45613	4.35662	4.72447	4.94267	4.367	4.44244	4.47319	5.19517
COBS02105	5.22726	5.76851	5.74719	6.76455	6.14589	4.33945	5.34902	5.67536	5.4302	4.00157	5.22066	4.75988	5.71645	6.17805	6.06607	5.9359	6.10709	5.95477	6.22504	6.21093	5.28042	4.00157	5.84178	5.8943
COBS02106	11.9463	11.7185	11.4842	12.6638	13.216	13.2752	12.4634	12.2738	12.527	11.7176	12.064	12.0958	11.2213	11.1752	11.5882	11.7575	11.6631	11.5451	11.1852	11.4656	12.1048	13.3983	10.9775	11.1204
COBS02107	6.70373	7.7665	7.83425	8.87296	8.25378	8.23059	7.60399	7.41969	7.2451	6.27342	7.24493	7.09832	7.4932	7.39501	7.59726	7.95547	7.80277	7.97928	7.09731	7.49557	7.64531	7.99798	6.86563	7.28725
COBS02108	5.07063	6.76775	6.52477	8.02018	6.52884	5.82348	6.5021	5.61342	5.20034	5.3522	5.22066	5.53709	6.31585	6.46245	6.83317	6.71179	6.69078	6.67473	6.32492	6.5978	5.1835	4.00157	5.97567	6.63033
COBS02111	4.80628	6.65605	6.18172	8.32165	6.70078	6.08697	6.85589	5.19318	5.84223	5.27975	5.22066	5.91622	6.59518	6.35586	6.91646	6.65483	6.74329	6.51786	6.0942	6.57356	5.07583	4.00157	6.18064	6.32433
COBS02112	6.15783	7.10618	7.0265	7.37723	7.09457	6.90591	6.72889	6.82791	6.76083	5.6015	6.91789	6.80941	7.15382	6.56123	7.04509	7.71515	7.60581	7.76536	7.30114	7.19374	6.79902	4.00157	6.68566	6.76919
COBS02113	11.592	12.1087	11.8199	12.5189	11.8653	12.0345	11.1193	10.7786	10.1696	11.724	11.887	10.9111	11.2701	11.2579	11.9298	12.0612	12.2014	12.141	10.982	11.2315	10.3957	11.0589	12.3478	11.6393
COBS02114	4.00157	4.38409	4.00157	4.33497	5.28094	4.33945	4.42128	4.98335	4.64053	5.02391	4.00157	4.48445	4.00157	4.62407	4.00157	4.00157	4.26473	4.56086	4.80775	4.63505	4.00157	4.97278	4.41045	4.28283
COBS02115	6.34041	7.13002	6.29209	7.90025	7.39271	4.00157	7.31065	5.6448	5.34422	5.54418	7.1231	5.24618	6.97397	6.38331	6.13986	7.09882	6.25239	6.41935	8.81485	6.40446	6.07673	5.14257	6.21626	6.39134
COBS02117	6.71815	7.74369	6.95014	9.24832	8.87001	6.41819	8.63402	7.51472	7.35346	6.45636	7.85261	7.40933	6.82689	6.71856	6.96935	6.99876	7.17085	6.92573	6.63316	7.19374	7.73251	4.00157	7.32153	7.60734
COBS02118	5.80992	4.00157	4.37895	4.47203	5.78968	5.72158	4.00157	5.81743	5.87093	6.09893	4.62456	5.98417	4.00157	4.00157	4.00157	4.38387	4.00157	4.00157	4.00157	4.32021	5.84648	5.21712	4.00157	4.00157
COBS02119	4.00157	4.00157	4.37895	4.47203	4.81061	6.75774	4.59308	4.00157	4.00157	4.65614	4.62456	5.24618	4.00157	4.00157	4.00157	4.46911	4.37323	4.56086	4.00157	4.45129	4.367	4.44244	4.23816	4.28283
COBS02121	4.36517	4.54097	4.00157	4.47203	4.95404	4.6728	5.01248	4.85579	5.14736	4.79992	4.62456	4.68136	4.00157	4.00157	4.00157	4.00157	4.00157	4.00157	4.00157	4.00157	5.1835	4.00157	4.23816	4.39871
COBS02122	4.00157	4.00157	4.53377	4.66402	4.00157	4.33945	5.16141	5.14499	4.64053	4.00157	4.00157	4.48445	4.44071	4.44343	4.00157	4.71169	4.00157	4.25294	5.97405	4.70844	4.51701	4.44244	4.23816	4.39871
COBS02123	6.30195	6.58789	6.66028	7.79762	6.52884	7.5664	7.19308	6.68327	7.49759	9.11155	9.21878	7.72759	6.42424	6.43658	6.09114	6.43924	6.3542	7.97368	6.84568	6.96477	6.92939	8.42978	9.21789	8.07614
COBS02124	10.0227	9.60597	10.0152	8.82176	9.26896	9.39698	10.0533	10.1584	10.0089	9.87254	9.92054	10.6572	10.3998	10.4012	9.83785	9.38255	9.12829	9.35896	9.63577	9.73801	9.97753	10.5392	9.42882	9.97598
COBS02125	11.5119	10.5297	10.9542	10.1266	10.5757	10.3503	10.7152	10.962	10.9926	11.1859	11.1718	10.9413	11.0839	11.1903	10.5818	10.4648	10.3761	10.3085	11.226	10.1993	10.994	11.9947	11.0059	10.7197
COBS02126	9.95148	10.0746	10.2875	9.92194	9.95638	9.73412	10.7816	10.2537	10.2613	10.4377	10.7596	10.1309	10.5627	10.4798	10.2155	10.9167	10.3126	10.6882	11.3862	11.2677	10.2318	9.08371	10.6462	10.3755
COBS02127	14.2456	14.1055	13.6139	14.6394	14.9947	14.307	14.8117	14.8889	14.8939	14.4767	14.3179	14.8282	13.943	13.7508	13.6629	14.0866	14.1434	13.779	14.2292	14.2618	14.7441	14.4753	13.8325	14.0028
COBS02128	5.31935	6.11057	5.27122	6.78766	7.24156	6.27157	7.1516	6.24542	6.32054	5.98173	6.84219	5.84437	5.40739	5.41553	5.61361	5.92151	5.95673	5.66905	6.20412	6.37645	5.97953	4.00157	5.94351	6.05878
COBS02129	6.26236	7.0941	6.54247	8.42649	8.33013	4.58417	8.26844	7.468	8.05711	6.87102	7.24493	6.72356	6.47532	6.43658	6.61678	6.86268	7.18165	6.51786	7.48758	7.79645	7.4006	4.00157	6.99052	7.60734
COBS02135	7.49959	8.83359	7.57377	10.6934	11.2245	8.62251	10.8904	9.89624	10.5122	8.44408	9.33861	9.70097	8.28022	7.92472	7.79129	9.36656	9.68612	8.81612	9.67979	10.081	10.18	8.8347	8.49658	9.37315
COBS02136	4.72315	5.28755	4.37895	5.29445	5.36949	4.00157	5.45763	4.78321	4.82212	4.00157	5.0648	4.59162	5.05767	4.62407	4.8384	5.02971	4.7389	4.98896	5.55836	5.20316	5.66513	4.00157	4.96043	5.10156
COBS02137	7.14679	7.97663	6.81278	9.39002	9.61951	7.3786	9.06432	8.33629	8.31103	6.82824	7.4357	7.6642	6.74707	6.87879	6.95631	8.15256	8.55076	7.89574	8.34825	8.66125	8.67795	7.77674	7.28971	7.9918
COBS02139	4.72315	4.54097	4.37895	4.93054	5.18399	4.00157	4.42128	4.70236	4.00157	4.46639	4.62456	4.34381	4.00157	4.44343	4.00157	4.99619	5.09339	4.82511	4.88249	5.31083	4.72674	4.00157	4.74242	5.03348
COBS02140	8.21977	7.98313	8.92046	7.15784	7.43681	8.3011	6.67067	7.1298	7.07096	8.42304	7.64842	7.60464	9.05683	9.22391	8.45791	7.51859	7.38648	7.8133	7.0863	6.89875	7.27987	8.40428	8.11933	7.62093
COBS02141	10.3261	10.6238	10.9389	10.8317	10.4243	10.0772	10.131	10.3474	10.4244	10.2909	9.66415	10.0593	10.7296	10.6567	10.7388	10.7739	10.7253	10.6878	10.4505	10.4095	10.1303	8.55094	10.7271	10.3728
COBS02142	9.00645	8.31708	7.84124	7.76933	8.40263	9.05522	8.44311	8.78138	8.51834	8.67511	8.8525	8.59387	8.41306	8.24683	8.31928	8.06047	7.98195	8.21129	7.85249	7.90956	8.73512	4.00157	8.60953	8.00219
COBS02143	14.9496	14.0216	14.1725	11.8077	11.7788	13.7485	12.2659	12.3623	12.3494	12.8919	12.8373	12.6521	14.3358	14.6355	14.3033	12.7693	12.9397	13.2707	12.4687	12.3039	12.1034	12.3805	12.4453	12.584
COBS02144	8.61628	7.45578	9.74741	7.58675	6.18956	7.43166	4.72355	5.99224	5.4302	11.6363	11.3946	8.83643	7.73669	6.73964	7.04509	6.78929	5.70717	7.15341	6.55433	7.72832	5.63204	10.7344	12.8456	10.5706
COBS02145	6.93054	6.05959	7.33643	6.24629	4.72705	5.58062	5.34902	4.00157	4.37248	8.48526	9.04725	6.5768	5.88511	5.06398	5.57645	5.44955	5.06397	5.84035	5.55836	6.09361	4.63121	9.55508	9.76735	8.35243
COBS02146	12.4711	12.078	12.0154	11.7142	11.6005	11.6317	11.7139	11.6556	11.604	11.7836	11.8602	11.6548	12.2696	12.1398	12.0806	11.9082	11.7184	11.6405	11.7548	11.8378	11.6438	11.5355	11.9701	11.7989
COBS02147	7.65513	9.03412	9.11386	10.7419	9.69167	9.24568	7.29806	6.26446	5.5099	6.6425	7.18533	6.74864	7.71619	8.4038	9.34457	9.52013	9.61412	9.94878	7.11907	7.73367	6.81263	4.62267	6.86018	7.22906
COBS02148	5.6896	6.27474	6.15848	7.4928	7.30015	7.18878	5.64749	5.28301	4.96746	5.6015	4.62456	5.43694	5.71645	5.81367	6.35954	6.32763	6.46693	6.78978	5.07255	5.63274	5.23313	4.00157	5.01317	5.25292
COBS02149	12.633	12.8371	12.3911	13.2914	13.2095	11.8388	13.3637	12.7246	13.0203	12.3953	12.6728	12.6509	12.4874	12.6304	12.3419	13.24	13.1579	13.0345	12.8643	13.1717	12.9138	12.7571	12.7252	12.8944
COBS02150	4.51443	4.00157	4.00157	4.66402	5.23364	4.00157	4.42128	5.19318	4.00157	4.91966	4.00157	4.95444	4.00157	4.44343	4.00157	4.27229	4.37323	4.25294	4.00157	4.00157	4.00157	4.00157	4.23816	4.00157
COBS02151	10.2994	8.3526	8.5853	8.45155	8.93248	9.2117	11.1299	8.6798	8.24658	9.12028	9.69617	8.88428	9.20322	8.60834	8.63357	8.6948	8.20548	8.43762	8.9737	7.84673	8.91594	8.5334	8.68271	8.22241
COBS02152	8.57812	8.56638	8.01799	8.51064	7.79566	7.90772	8.34938	7.8838	8.03965	7.5177	8.1286	8.16253	7.90898	8.14987	7.70144	9.2627	8.60533	9.07952	8.46207	8.56873	7.74653	4.62267	8.69782	8.38185
COBS02153	5.36249	5.42853	4.65157	6.06315	5.23364	7.67074	5.22791	5.67536	5.38807	5.42	5.47464	5.36471	4.87008	4.00157	4.9158	6.10952	4.82376	7.08681	4.80775	5.03811	5.07583	4.00157	5.11005	5.25292
COBS02154	9.51629	8.90359	9.49965	8.72534	9.03568	9.39887	8.83312	9.02256	8.46707	9.06709	8.81407	9.11406	9.30913	9.74322	9.34457	8.68092	8.67122	9.12436	8.49123	8.3602	8.95855	4.00157	8.62384	8.95677
COBS02155	10.6855	10.2105	10.42	9.68339	10.2155	10.5614	10.5699	10.5296	10.2424	10.4024	10.3741	10.4127	10.8219	11.0916	10.548	10.1957	10.1558	10.0741	10.1542	10.1212	10.4339	11.2379	10.097	10.0148
COBS02156	6.13588	5.95112	5.92811	6.46632	6.35106	6.60523	7.64419	8.31019	7.23483	6.87102	6.53884	7.36202	5.71645	5.89544	6.11573	6.12195	6.51995	6.13571	7.32932	7.35618	8.01896	4.00157	6.79299	7.28154
COBS02157	6.95494	5.70104	6.03564	5.21568	6.70078	5.91757	5.55651	6.06033	5.65422	5.85257	5.0648	6.36373	5.96153	5.77065	6.29738	5.78388	5.69077	5.75773	5.78392	5.43899	6.05311	4.00157	5.33475	5.56635
COBS02158	11.8384	11.1869	11.5338	10.4439	10.2996	10.9569	10.6394	11.1102	11.1202	10.8792	10.7871	10.9611	11.9068	12.0081	11.1532	11.1104	11.0531	10.9363	11.3423	11.1496	11.1994	10.3505	11.1312	10.9774
COBS02159	9.00932	7.86841	7.66336	7.47886	8.42889	7.91304	8.07686	8.59952	9.10888	8.2506	7.96243	8.87037	8.43822	8.73185	7.72444	7.77258	7.70954	7.97928	7.9817	7.84178	8.53231	5.47046	7.7231	7.74595
COBS02160	9.7382	9.67958	9.86295	11.0579	11.439	12.8864	10.4762	10.6779	10.0442	10.9939	10.5421	10.8033	9.54125	9.0899	9.92435	11.9112	11.821	11.7872	10.3845	10.2943	10.7758	11.4649	10.0976	9.95394
COBS02161	8.28763	8.9104	8.93354	8.93259	7.7821	7.90772	8.01706	7.38654	7.8786	7.86956	8.33296	7.72137	8.51705	8.80703	8.71966	8.23638	8.45934	8.4192	8.32529	8.5355	7.59186	4.00157	9.05398	8.75103
COBS02162	11.8949	10.3905	11.1241	10.657	11.0941	12.4912	10.978	10.982	11.2208	11.2686	10.9793	10.6402	10.6949	11.1427	10.8973	10.9702	11.0186	11.0936	10.5025	10.5154	10.6404	10.9266	10.1224	10.229
COBS02163	8.40137	8.67048	8.02414	10.5878	11.2705	9.95808	10.91	9.83209	10.2233	8.00815	8.59355	9.28937	7.9269	7.74193	8.38309	9.94305	10.1853	9.5856	10.2091	10.4359	9.70126	7.9634	7.51603	8.92989
COBS02164	4.00157	5.42853	4.75006	6.83276	6.8536	4.00157	7.16557	5.94473	4.96746	5.11707	5.58241	5.43694	4.62026	4.97491	4.7521	5.23529	5.56907	5.10042	5.97405	5.90497	5.66513	4.00157	5.11005	5.98665
COBS02165	4.00157	4.38409	4.37895	5.84947	6.27277	4.00157	6.2017	5.76259	5.54771	4.00157	4.00157	5.11173	5.21259	4.97491	4.98643	4.96131	5.20265	4.89473	5.52226	5.40836	5.66513	4.00157	4.96043	5.19517
COBS02166	4.00157	5.47171	4.37895	6.65545	6.36993	4.00157	5.29025	4.98335	4.00157	4.91966	4.87603	4.89485	4.75649	4.87534	4.98643	5.23529	5.53182	5.15144	6.13929	6.00278	4.88522	4.00157	5.35292	5.87822
COBS02169	4.00157	4.66032	4.00157	4.80946	4.63148	4.00157	4.59308	5.47861	4.37248	5.11707	5.77192	4.95444	4.62026	4.62407	4.00157	4.00157	4.64182	4.43587	4.00157	4.63505	5.48933	4.00157	5.35292	5.43281
COBS02170	7.75471	8.44008	8.10172	10.8283	10.0509	10.0414	10.0736	9.32547	9.81446	8.87411	9.54026	9.59002	7.87245	8.02076	8.07948	9.96935	9.70565	9.83861	8.78826	9.54991	9.38618	8.84894	9.06799	9.88104
COBS02172	4.94899	4.99675	4.53377	6.36082	7.62371	4.00157	6.30953	6.26446	6.52445	6.09893	6.5865	5.89273	5.05767	4.7611	4.53523	4.80452	5.3907	4.82511	5.55836	5.63274	6.47705	7.32258	4.90414	5.38445
COBS02179	10.5285	11.4927	11.3259	12.8063	11.7805	11.7968	9.62966	7.52236	8.06864	9.87512	9.86059	8.93326	10.0969	10.7687	11.7149	12.2712	12.0281	12.24	9.56515	9.07879	7.68229	6.81593	10.5531	9.35979
COBS02180	8.54684	9.79632	8.98471	10.7819	10.6611	8.78743	10.1945	9.68442	9.94176	8.62074	8.54742	9.32038	9.20688	8.90154	9.2426	10.0677	10.2315	9.97837	9.92201	10.2495	9.72083	9.90743	9.11484	9.84124
COBS02183	4.00157	5.23597	4.9838	5.21568	5.84718	4.00157	5.50816	5.58118	4.64053	4.46639	4.00157	5.32668	4.62026	4.62407	4.53523	4.46911	4.52574	4.35662	4.00157	5.0822	6.00453	4.00157	4.74242	4.62658
COBS02184	5.12576	6.53444	5.31979	7.49972	7.87444	6.10665	7.23337	6.7509	7.03576	6.3057	6.95426	6.73616	6.16662	5.58125	5.57645	5.78388	6.07112	5.82696	6.34403	6.83954	6.593	4.00157	5.99666	6.52598
COBS02188	10.0369	9.4204	10.2773	8.90438	9.16356	10.6289	10.7883	11.0918	9.92131	9.64659	9.86059	10.7982	9.67665	9.83222	11.5918	10.0677	10.2651	9.96576	11.2468	11.1709	10.8069	10.9542	10.2552	11.2179
COBS02189	8.91149	9.10415	9.30712	9.25848	9.16876	10.1076	8.63898	9.1651	8.9594	8.98343	8.88066	9.13747	9.40141	9.17558	9.56124	9.67696	9.64335	9.88324	9.01727	8.97904	9.12546	7.76673	9.00749	8.84612
COBS02190	7.61023	7.85429	8.53894	7.77504	7.53738	7.44646	7.85563	7.95305	7.75542	8.28212	7.53419	8.01321	7.91797	8.11866	8.32429	8.07269	8.05653	7.84131	7.37508	7.45061	7.68229	8.21179	8.53915	7.62093
COBS02191	10.6675	11.1742	11.5166	7.40702	5.84718	7.61299	11.3036	11.3967	10.6761	10.1806	10.5854	11.0805	11.3392	12.586	11.5715	6.86268	7.65285	7.47429	11.0052	11.0995	10.8276	10.6995	11.6816	12.3347
COBS02192	6.15783	6.85678	6.4516	5.6744	5.69798	6.72117	5.69046	5.44222	6.17241	6.80635	6.43818	6.51927	6.25817	6.84044	6.95631	5.09319	5.00205	5.24602	6.18286	5.82081	5.66513	4.44244	6.93983	6.63943
COBS02193	7.54806	8.5001	7.34633	7.66876	6.4069	5.84768	7.86415	7.58204	8.01602	7.47721	8.03123	8.27256	7.43153	8.21031	8.17694	7.0867	7.44568	7.20741	9.08708	9.01233	7.95406	9.07969	8.7937	9.44826
COBS02194	8.52694	9.15954	9.24028	10.1442	9.34209	9.8463	8.85458	9.18197	8.5433	9.32668	9.50454	8.77504	8.75073	8.72152	9.2373	9.3416	9.48121	9.81927	8.48296	8.56574	9.15716	9.65021	9.51226	9.06282
COBS02195	7.39738	9.09521	9.07307	8.80243	7.8091	5.96209	7.72134	7.70112	7.65935	7.44956	7.4357	7.72759	9.2712	9.43759	9.02946	9.24262	9.12829	9.25221	9.37516	9.12009	8.03045	5.5255	9.07725	9.03619
COBS02196	12.4036	11.72	11.6728	11.1172	11.6163	12.3525	11.143	11.4162	11.5761	11.8932	11.4442	11.5109	11.6061	11.9093	11.7173	11.6733	11.685	11.7047	11.3655	11.1928	11.5157	12.1439	11.4231	10.8341
COBS02197	9.64724	9.13065	9.21908	9.04961	9.65882	10.6029	8.95335	9.63455	9.61143	9.83328	8.97074	9.36269	9.3494	9.32622	9.40953	9.33023	9.36901	9.43311	8.91348	8.94955	9.63341	8.37831	9.30521	8.6732
COBS02198	11.9122	11.8474	11.6743	11.6145	11.0616	10.6045	13.1371	12.8407	13.1799	11.5298	12.1319	12.9198	11.8617	12.2079	11.8823	11.454	11.4714	11.2666	12.5684	12.7619	13.0809	12.8428	11.7974	13.0226
COBS02199	10.8552	10.258	10.1956	10.1884	10.6398	10.9034	11.5586	11.7547	11.6869	11.3515	11.0346	11.3319	9.42044	10.4348	10.1381	10.0408	10.2437	10.1423	10.5762	11.0416	11.5579	12.2392	10.5093	10.8166
COBS02200	11.5819	9.98878	10.7932	8.99229	9.73084	10.4067	10.0272	10.0911	10.0208	11.149	11.2277	10.4317	10.5712	10.4614	10.2514	9.58959	9.41041	9.376	9.63204	9.78754	9.88279	11.6153	10.7493	10.1064
COBS02201	8.55472	8.84431	9.25598	8.68971	8.29722	8.99904	7.54148	8.07708	8.3493	8.60215	8.77459	7.95625	9.21417	9.15655	9.20242	9.28644	9.30702	9.5248	8.96185	8.60994	8.14056	7.29487	9.23558	8.52773
COBS02202	8.66807	9.09221	8.5602	9.16	9.1791	8.94575	9.06063	8.49531	9.0521	8.74455	9.04725	8.76906	8.74571	8.68477	8.71586	8.78834	9.12829	8.87879	9.0456	9.28351	8.80019	10.0801	9.44232	9.1845
COBS02203	10.6195	10.7982	10.6892	10.286	10.0296	9.8324	9.40974	9.54431	9.35873	11.5076	11.5501	10.7159	10.863	10.4442	10.653	10.4261	10.1679	10.2369	10.0727	10.061	9.74536	11.3463	12.2345	11.1625
COBS02204	9.26593	8.36258	9.15352	7.98622	8.64219	9.64942	8.97311	10.2121	9.629	9.53355	8.31929	10.7812	9.12029	9.47493	8.80089	8.40757	8.1023	8.30124	9.01727	9.20699	9.77969	4.00157	8.23789	9.73562
COBS02205	6.34041	7.08192	6.98884	8.16589	7.84214	7.57987	9.10427	8.34489	9.23667	6.7385	7.69166	7.94565	6.45002	6.51274	6.59994	7.76505	8.14938	7.58915	9.13532	8.9655	8.37022	4.00157	6.79872	8.07286
COBS02206	5.01193	5.0626	5.04887	5.6744	6.02981	4.00157	6.05308	6.31999	5.89898	5.27975	5.58241	5.01005	4.62026	4.62407	4.65334	4.99619	5.20265	4.95872	5.66034	6.07595	6.12271	4.00157	5.13275	5.58716
COBS02207	7.35251	5.62952	6.62765	5.6744	6.00528	4.00157	5.81083	5.84395	5.81285	9.72304	9.00525	6.90143	5.28168	4.62407	4.98643	5.2614	4.7389	4.78773	5.44638	5.4688	5.63204	10.5407	9.48643	7.70831
COBS02208	5.12576	4.00157	4.00157	4.74063	5.07627	4.33945	5.50816	5.92029	5.58432	4.79992	5.47464	5.62912	4.44071	4.00157	4.00157	4.54066	4.7389	4.66171	5.44638	5.55371	5.97953	4.00157	4.90414	5.35943
COBS02209	7.22874	8.52254	8.40902	7.35447	6.65599	6.79337	6.2017	6.66934	6.54154	6.7385	7.05798	6.82125	8.68925	7.83144	8.04951	7.34212	7.79231	7.55941	7.11907	6.86946	6.33108	8.6787	8.01202	7.10494
COBS02210	8.65346	9.2749	8.4866	10.7563	11.2486	8.64499	10.9008	9.89039	10.4121	8.45103	9.14334	9.45685	8.57488	8.53353	8.83285	10.2677	10.7385	10.0445	10.6582	10.8804	9.90629	7.65177	9.00749	9.79536
COBS02211	6.4669	7.04474	5.60956	7.0764	8.04863	6.64498	7.73999	7.78591	7.50613	6.36801	7.24493	7.06901	6.34378	5.41553	5.84548	6.46813	6.72103	6.14621	6.81916	7.47647	6.79902	4.00157	6.09675	6.51609
COBS02212	10.2138	9.92127	9.72127	9.56067	8.03156	10.0618	11.571	11.7531	11.7993	11.4025	11.393	11.6584	9.72336	9.85363	9.70808	8.90883	8.83234	8.61523	10.6818	11.2178	11.8227	12.2699	10.4125	11.7207
COBS02213	10.077	10.1813	10.4657	10.1788	10.0952	10.0207	9.96346	10.0139	9.9573	10.4481	10.2892	10.5234	10.4061	10.1552	10.2355	10.6681	10.5828	10.6563	10.3666	10.3229	9.84275	10.1678	11.0797	10.5289
COBS02214	7.3796	6.92685	6.76878	6.83276	7.50464	6.60523	6.89014	6.76403	6.54154	7.31801	7.35707	7.06901	7.05859	7.05616	6.95631	7.25842	7.10428	7.16834	6.79213	6.73488	7.0486	4.00157	7.02493	6.71874
COBS02215	9.26833	8.5963	9.28688	8.39731	8.26355	8.67961	8.8841	8.80335	8.57188	9.53681	9.56359	9.48995	8.75574	9.16037	9.14138	8.50308	8.2645	8.51093	8.53989	8.21116	8.6108	5.57798	9.19254	8.56783
COBS02216	9.23195	9.82364	9.32211	9.59636	8.47584	8.06874	8.57833	8.7429	9.01692	8.03618	8.09687	9.18542	9.88274	10.056	10.2262	9.59171	9.5873	9.52002	9.82734	9.87935	8.79011	8.76133	9.71196	10.3972
COBS02217	13.0303	12.4011	11.9033	11.9408	12.2499	12.4671	12.0837	12.4903	12.4077	12.7262	12.3251	12.443	12.5441	12.1766	12.1452	11.7375	11.8148	11.7062	11.7371	11.8082	12.5007	12.6397	12.3983	11.791
COBS02218	9.22703	9.59755	9.96356	9.48827	8.79127	9.76519	8.99259	8.78769	9.00201	9.47011	9.55197	8.99864	9.47606	9.31253	9.66538	9.1276	9.3131	9.46731	9.31361	9.06828	8.90975	10.0352	9.61199	9.50759
COBS02220	4.51443	4.54097	4.00157	4.33497	4.88559	4.6728	5.34902	4.85579	4.52469	4.00157	5.35526	4.59162	4.00157	4.00157	4.00157	4.46911	4.52574	4.50244	4.36585	4.00157	4.51701	4.00157	4.23816	4.00157
COBS02221	8.15893	10.8567	10.1332	12.2758	11.9017	10.8255	11.5422	10.473	10.9698	8.09064	8.91737	9.4735	8.98192	9.72526	10.6138	10.7414	11.016	10.8555	10.5086	10.8102	10.7141	4.75941	8.55748	9.74387
COBS02222	4.00157	6.36013	5.8105	7.81432	8.38036	7.55281	7.47609	6.84034	7.55632	5.42	5.22066	6.29608	5.40739	5.52868	6.16356	5.71737	5.94336	6.04842	5.55836	5.94501	6.5112	8.50968	5.33475	5.54516
COBS02223	4.36517	6.4404	5.84097	8.24997	7.28089	5.34843	7.82104	4.98335	5.29847	4.00157	5.77192	5.24618	5.46512	5.77065	6.33914	5.64695	6.02154	5.94256	5.72372	6.12822	6.31166	4.00157	5.38833	5.92584
COBS02224	4.36517	5.33666	4.53377	6.70501	6.90524	4.00157	7.00378	5.04052	5.68767	4.00157	5.93575	4.00157	4.87008	4.97491	5.4983	5.02971	5.27726	5.29015	4.95071	5.27619	5.78899	4.00157	4.98721	5.19517
COBS02225	4.00157	5.59206	4.65157	6.98994	5.81877	4.00157	5.08996	5.09424	5.34422	4.00157	4.00157	5.40143	4.87008	5.41553	5.32321	4.92491	5.22814	5.26832	4.88249	4.99172	4.88522	4.00157	4.81141	5.25292
COBS02227	4.00157	4.54097	4.00157	4.00157	4.88559	4.00157	4.72355	4.78321	5.09127	5.70832	4.00157	4.75988	4.00157	4.62407	4.00157	4.00157	4.00157	4.00157	4.51538	4.00157	4.00157	4.00157	4.62342	4.4872
COBS02230	4.00157	5.95112	5.92811	7.40702	7.37468	6.12604	6.93998	5.81743	5.75188	4.65614	4.00157	5.47133	5.51999	5.52868	5.75152	5.49188	5.53182	5.45011	5.89609	6.12822	5.69732	4.00157	5.19778	5.30754
COBS02237	8.65346	6.20688	7.44172	5.17383	6.00528	5.51907	5.69046	6.24542	6.0053	9.02122	8.55909	5.56859	6.16662	6.26994	6.01442	4.60343	4.64182	4.86071	5.52226	5.77647	5.81807	4.00157	9.33157	7.66965
COBS02238	11.4683	11.2831	10.8734	11.9082	12.8338	11.9766	13.034	12.9842	13.3784	11.9482	12.0226	12.6776	11.2995	11.0613	10.826	11.7308	11.9459	11.2284	12.729	12.7609	12.9653	11.3513	11.597	11.89
COBS02239	4.00157	4.00157	4.00157	4.57651	4.36716	4.00157	4.83244	5.19318	4.37248	4.65614	4.00157	4.59162	4.44071	4.97491	4.37999	4.46911	4.26473	4.35662	4.36585	4.83471	4.00157	4.00157	4.33579	4.68519
COBS02240	6.65953	7.97663	7.69459	8.96026	7.45408	6.08697	8.16212	7.8897	8.08576	6.6425	6.84219	7.41706	6.92062	7.25756	7.4204	8.45028	8.67689	8.14305	9.28063	9.6264	7.56833	4.00157	8.35124	9.02438
COBS02241	9.42903	8.50462	8.8463	8.37876	8.97465	8.52546	9.01943	9.05432	9.03755	9.06709	9.08	8.8898	8.86634	8.72669	8.72346	8.60528	8.67689	8.81768	8.47046	8.49206	9.14403	4.44244	8.70082	8.52773
COBS02242	8.78658	9.43936	9.61978	9.40656	9.09422	8.49749	8.96129	9.00642	9.15005	9.25716	8.83341	8.42132	9.4516	9.76348	9.58435	9.74038	9.66061	9.78539	9.77419	9.42862	8.55631	4.75941	9.72969	9.20556
COBS02243	7.8218	7.15347	7.61519	7.15784	7.01487	7.26613	6.93998	6.93596	6.65557	7.43553	7.15456	6.76101	7.28558	7.38185	7.62199	7.4115	7.42773	7.57064	7.11907	6.84959	6.74324	4.00157	7.54656	6.8258
COBS02244	8.41443	7.68898	8.31705	9.13374	7.76151	7.76795	8.04727	7.45208	6.99965	8.29762	8.49977	7.39374	9.08891	8.03755	8.16581	9.69481	7.78179	7.91343	12.201	7.50815	7.38269	4.75941	8.20863	7.53263
COBS02245	9.89679	10.2174	10.4612	10.1087	9.52948	9.89928	8.7981	8.92	8.73961	10.6973	10.5625	9.65955	10.1204	10.054	10.3612	9.28513	9.11304	9.6164	8.32991	8.15252	8.85601	11.108	10.9377	9.70003
COBS02246	11.0369	9.77968	10.1626	9.24014	9.88558	10.2186	9.64697	9.91796	9.8925	10.5042	10.3575	9.92723	10.1959	9.84415	9.96172	9.65991	9.55382	9.62356	9.24443	9.26337	9.48731	10.6956	10.0584	9.14922
COBS02247	10.8344	9.61642	9.96356	7.99601	7.86161	7.51824	9.8802	10.198	9.33513	8.71025	8.57067	9.61023	10.6936	10.466	10.0504	8.52766	8.46809	7.78473	9.95522	9.93014	9.85569	7.9634	8.83389	9.65264
COBS02248	11.4362	11.012	12.359	9.09569	8.77772	8.40265	9.26668	9.31677	9.01692	9.51713	9.50454	9.71659	11.6664	12.6762	12.1253	9.65688	9.56201	9.46532	9.95224	9.64066	9.39285	8.61901	9.61597	9.73975
COBS02249	7.91074	7.75133	7.58215	7.83083	8.89532	8.09702	7.906	6.53711	7.09394	9.22919	9.34536	8.18071	7.99643	7.34162	7.28202	8.37591	8.56918	8.128	9.10872	8.7974	7.42706	6.20518	9.40695	8.28323
COBS02250	9.1381	9.70134	9.33202	9.48999	9.82599	9.67458	9.69531	9.72607	9.62316	9.81189	9.90693	9.45685	9.55567	9.168	9.12141	8.8463	9.24098	8.9084	8.65846	8.63297	9.50998	8.67337	9.48643	8.59776
COBS02251	11.491	10.7421	10.7579	11.1552	10.4469	11.8209	12.2559	11.1314	11.1339	11.1607	10.7747	11.2933	11.3459	11.0155	10.8056	10.6919	10.4633	10.5154	11.7824	10.7693	11.0478	12.077	10.6536	10.4704
COBS02252	8.3479	8.1483	8.54748	8.7106	7.24156	7.72017	8.5204	8.20547	7.76255	7.12107	7.40997	8.07287	7.83496	8.12653	8.19347	7.91869	7.90651	8.06087	8.41066	8.18018	8.18748	8.44237	7.98266	8.0125
COBS02253	12.0879	12.9527	13.971	11.6493	10.0509	10.7155	13.0907	13.0819	12.8489	12.2116	12.7505	13.0739	13.226	13.8437	13.5266	12.6325	12.7922	12.3073	14.1403	13.646	13.2692	11.6962	13.6736	14.1663
COBS02254	11.6533	11.3978	11.3638	11.6022	12.0508	11.7595	12.1866	12.2503	12.3806	11.6279	11.4379	12.011	11.193	11.3453	11.3057	11.7532	11.7133	11.6055	11.9501	11.9972	12.2596	11.5435	11.3739	11.7383
COBS02256	10.2286	10.5275	10.2501	10.8976	10.8548	10.681	10.6591	10.3988	10.8308	10.1122	10.1613	10.4792	10.356	10.0642	10.3925	10.7571	10.8467	10.6111	10.7735	10.7925	10.4176	10.3786	10.1858	10.3755
COBS02257	7.89214	9.89576	9.46405	11.7667	10.167	8.62251	9.64943	7.7145	8.7142	9.41089	10.2101	8.87037	8.78052	9.28476	9.56336	11.4267	11.1822	11.3371	9.94474	10.473	8.15112	4.44244	10.6547	10.4655
COBS02258	4.00157	4.76009	4.91335	5.72706	5.87496	4.00157	5.81083	5.04052	4.96746	4.00157	4.00157	5.06232	4.62026	4.7611	4.98643	5.55251	5.22814	5.29015	5.01375	5.0822	4.88522	4.00157	5.06291	5.16497
COBS02259	5.31935	5.76851	5.16646	7.42896	7.13816	4.00157	6.47948	5.40459	5.38807	5.85257	5.77192	6.06946	5.62235	5.28919	5.64962	6.68767	6.25239	6.11443	6.11694	6.28873	5.56291	4.00157	6.21626	6.05878
COBS02262	4.51443	6.05959	5.31979	8.04394	7.63131	4.99763	6.72889	5.9687	5.92641	4.65614	7.55778	6.56264	5.67034	5.81367	5.93278	6.45857	6.5457	6.57218	6.0942	6.49812	5.95402	4.00157	6.57597	6.67525
COBS02264	12.8055	12.3631	12.1457	12.4892	13.0275	12.9955	12.6784	12.6901	12.8675	12.7794	12.5822	12.6265	12.0995	11.9541	12.0352	11.9312	11.9189	11.8931	11.7853	11.7795	12.6267	13.4462	12.1937	11.796
COBS02265	5.75126	4.66032	4.53377	5.08422	5.36949	4.00157	5.55651	5.51384	6.17241	5.11707	5.22066	5.24618	4.75649	4.62407	4.53523	5.23529	5.06397	5.07383	5.52226	5.40836	5.45065	4.44244	4.33579	4.95972
COBS02266	9.90451	9.62058	9.26377	10.3699	11.5704	11.0802	11.0661	11.2279	11.5816	10.3044	10.3169	10.7019	8.94734	9.2312	9.58226	10.5336	10.8786	10.5701	10.8502	10.8203	11.1911	10.5523	9.58141	9.76327
COBS02267	5.91947	6.95392	6.29209	7.54724	7.02654	6.37108	6.0842	6.2261	6.0553	6.022	5.22066	5.59925	6.16662	6.26994	6.47582	7.56275	7.70583	7.62904	7.58406	7.74433	6.23101	4.00157	6.34984	7.06546
COBS02268	10.4787	10.1939	9.66163	10.3396	10.733	11.6614	10.3774	10.2434	10.2335	10.6071	10.6052	10.34	10.1204	9.7685	10.1621	10.1045	10.0375	10.3592	9.56906	9.53929	10.0775	10.2945	10.1911	9.57848
COBS02269	5.27434	5.12398	4.75006	5.56144	4.81061	4.00157	5.34902	4.78321	4.73743	4.65614	4.62456	4.59162	4.44071	4.62407	5.16953	5.2614	5.253	5.33246	5.17993	5.79884	5.56291	4.00157	4.84358	5.10156
COBS02270	5.89297	6.79807	6.98884	6.45174	5.45123	5.51907	5.34902	6.26446	4.89811	5.48382	6.1474	5.89273	7.36704	7.34162	6.74456	6.86981	6.79389	7.11794	6.84568	6.96477	6.00453	4.00157	6.70414	7.21713
COBS02271	7.87961	7.92354	8.06643	7.01936	7.03811	6.28868	7.79453	7.89557	7.27549	7.37799	7.90857	8.00813	8.73053	8.62506	8.04951	8.08782	7.94158	8.07664	8.07286	8.24523	7.29913	8.31126	7.67178	8.28889
COBS02272	12.5795	12.206	12.0537	12.7684	12.8499	13.047	12.977	12.334	12.6841	12.6719	12.7428	12.5633	12.387	11.8934	12.1004	12.5016	12.3728	12.3737	12.871	12.3994	12.3814	13.0554	12.8167	12.4245
COBS02273	9.0489	9.7666	9.63986	9.16649	8.59273	8.77584	8.426	8.88511	9.07793	8.8844	8.53566	8.81916	9.65272	9.84177	9.66538	9.29686	9.41155	9.35574	9.26626	9.17795	8.82673	4.62267	9.45481	9.19206
COBS02274	7.802	6.72098	6.97606	6.45174	7.77527	8.32915	7.16557	8.15744	7.43633	8.4371	6.53884	7.98242	7.56384	7.60185	7.26109	7.1637	6.75794	7.05497	6.92232	6.93686	8.31499	6.07517	6.99052	6.63943
COBS02275	9.2221	9.71502	8.86007	10.1969	9.74656	8.30514	11.0194	10.1449	10.7863	9.97949	10.1536	10.3944	8.92084	9.14114	8.93123	9.93473	9.99206	9.41157	10.5487	10.9101	10.0789	10.108	10.1055	10.782
COBS02276	10.055	10.1586	10.3486	9.67583	9.10782	9.95552	9.19787	9.73752	9.53685	9.57222	9.26933	9.46982	10.6699	10.7712	10.4645	9.67696	9.75736	9.8478	9.86913	9.74463	9.77629	9.00116	9.86279	9.81506
COBS02277	8.80981	9.15093	9.66555	8.62514	8.3623	9.11849	8.05472	7.8897	8.16842	8.7614	8.82378	8.281	9.21417	9.18688	9.52043	8.96549	8.86748	9.19331	8.27344	7.90483	8.02472	4.00157	9.17324	8.51089
COBS02278	11.3979	11.1806	10.7625	11.1927	11.3279	11.7249	11.0532	11.1885	11.2438	11.0349	10.7647	10.7678	10.9528	11.0375	10.793	11.0044	10.8663	10.9146	10.9761	10.842	11.1299	10.4841	10.5927	10.5301
COBS02280	13.0691	12.7404	12.4756	9.026	8.42455	10.1597	8.67803	9.07252	8.8735	7.81662	8.1286	8.35887	12.3441	14.028	13.7824	10.5024	10.2795	10.0121	11.079	10.0439	9.38841	8.35852	8.95945	9.88104
COBS02285	4.51443	5.0626	4.00157	4.87236	4.88559	4.00157	5.55651	4.70236	4.00157	6.42755	5.22066	5.32668	4.62026	4.44343	4.00157	4.88682	4.64182	4.74829	4.36585	4.55127	4.00157	4.00157	5.42262	5.16497
COBS02286	4.00157	4.76009	4.37895	5.61929	4.63148	6.83949	4.00157	4.00157	4.00157	6.3057	6.72027	6.14945	4.44071	4.44343	4.53523	4.38387	4.37323	4.61349	4.00157	4.7744	4.00157	4.00157	5.94351	5.22446
COBS02287	6.32132	6.85678	6.48868	8.25405	8.60045	6.28868	7.95466	6.95887	6.89853	6.20639	5.35526	5.84437	6.31585	6.26994	6.56562	7.44967	7.89679	7.58177	7.56842	7.47647	7.52006	4.00157	5.59431	6.45515
COBS02288	4.00157	5.33666	4.9838	6.45174	6.9672	4.33945	6.56778	5.76259	5.72021	4.46639	5.0648	5.06232	4.87008	4.44343	5.11245	5.28685	5.53182	4.95872	5.94859	6.1948	5.59799	4.44244	4.90414	5.56635
COBS02290	4.80628	5.42853	4.37895	6.68045	7.52111	4.00157	6.14427	5.73421	6.89853	4.79992	4.87603	5.40143	4.87008	4.7611	4.7521	5.47092	5.81613	5.10042	6.07105	6.02147	6.07673	4.00157	4.87445	5.3338
COBS02291	4.51443	4.00157	4.00157	4.33497	4.95404	4.00157	4.00157	4.85579	5.20034	4.79992	4.00157	4.48445	4.00157	4.44343	4.00157	4.27229	4.00157	4.00157	4.36585	4.55127	5.28042	4.00157	4.00157	4.28283
COBS02292	7.16773	7.13002	6.98884	6.78766	6.42501	5.91757	5.50816	6.12499	5.65422	5.89712	6.2109	6.1687	7.31326	7.12126	6.98226	6.85551	6.84953	6.8027	6.38144	6.49812	5.1312	4.00157	6.64794	6.69281
COBS02293	8.1008	7.83285	8.15306	8.20012	7.49634	9.12078	7.53078	7.69439	7.42735	7.78389	7.32986	7.69624	8.04644	8.09481	8.31425	7.95217	7.78179	8.39428	7.47923	7.48923	8.08105	8.82032	8.44558	7.81837
COBS02294	5.44388	4.00157	4.00157	4.98486	5.32615	6.12604	6.54624	5.54801	6.34042	5.80636	5.58241	5.86878	4.00157	4.00157	4.00157	5.12336	5.253	4.70643	4.00157	5.12426	5.28042	4.00157	4.87445	5.19517
COBS02296	4.00157	4.00157	4.00157	4.33497	5.01729	4.33945	4.72355	4.60994	5.2506	4.00157	4.00157	4.59162	4.00157	4.00157	4.00157	4.27229	4.37323	4.25294	4.36585	4.00157	4.81027	4.00157	4.57792	4.39871
COBS02297	4.51443	4.00157	4.75006	5.17383	5.32615	4.33945	5.60289	5.44222	5.81285	5.02391	4.00157	5.15866	4.96909	4.62407	4.00157	4.99619	5.34678	4.98896	5.07255	4.83471	5.45065	4.00157	5.21852	4.78856
COBS02298	4.00157	4.00157	4.00157	4.66402	4.88559	4.47832	4.83244	4.78321	5.81285	4.79992	5.0648	5.01005	4.62026	4.00157	4.00157	4.71169	4.58682	4.50244	4.62923	4.7744	5.56291	4.44244	4.87445	4.73885
COBS02299	4.36517	4.00157	4.00157	4.93054	5.28094	4.00157	5.64749	5.84395	4.00157	4.46639	5.0648	5.01005	4.00157	4.00157	4.00157	4.88682	5.00205	4.50244	4.88249	4.89054	4.95364	4.00157	4.74242	4.62658
COBS02300	4.51443	4.00157	4.37895	4.93054	5.36949	4.00157	5.88495	5.04052	4.64053	4.46639	4.00157	4.75988	4.00157	4.00157	4.00157	4.80452	5.30095	4.78773	5.17993	5.20316	5.1312	4.00157	4.84358	4.62658
COBS02301	4.00157	5.28755	4.00157	4.66402	4.63148	4.00157	5.60289	5.28301	4.37248	4.46639	5.22066	4.00157	4.44071	4.44343	4.37999	4.46911	4.69219	4.35662	5.07255	4.63505	4.63121	4.62267	4.93277	4.83505
COBS02302	4.36517	8.87251	4.53377	4.80946	5.28094	4.00157	5.16141	5.47861	5.03153	4.00157	5.47464	5.11173	6.82689	5.52868	4.00157	4.71169	4.86276	4.61349	4.62923	4.89054	4.72674	4.00157	4.81141	5.62767
COBS02305	11.4833	11.7397	11.607	10.8487	9.92142	11.4341	8.95733	8.85537	8.36339	11.3149	11.579	9.5134	11.4099	11.1456	11.5455	9.98393	10.0623	10.5585	8.78826	8.71079	9.10664	11.8637	11.5038	10.3926
COBS02306	4.72315	4.76009	4.37895	5.08422	4.63148	4.00157	5.08996	4.00157	4.00157	4.00157	4.00157	5.32668	4.44071	4.00157	4.53523	4.46911	4.69219	4.61349	4.51538	4.94267	4.367	4.00157	4.57792	4.92028
COBS02307	9.32006	9.06804	9.10521	8.24997	8.33939	8.94575	7.82976	8.56684	7.75542	9.4564	9.70669	8.2208	9.36586	9.30218	9.16945	8.69874	8.65023	8.69048	8.68032	8.37394	8.26242	8.63554	8.2927	8.26324
COBS02308	10.0974	9.81459	9.79653	9.26051	9.56538	9.85044	10.1878	10.5704	10.5476	9.90319	9.75309	10.349	10.1339	10.0354	10.0337	9.0981	9.51639	9.11931	10.0336	9.92316	10.4521	8.2337	9.888	10.258
COBS02309	12.5905	12.3767	12.2395	12.4439	12.4073	11.8697	12.0595	11.9623	12.1863	11.6641	11.9179	11.8946	12.3366	12.5276	12.4468	12.4596	12.4117	12.2788	12.2321	12.1249	11.7978	11.7299	11.8236	11.9854
COBS02310	5.44388	5.47171	4.91335	5.25583	4.88559	4.94265	5.50816	5.32512	5.09127	4.46639	5.35526	5.74155	5.05767	4.62407	4.8384	5.20849	5.09339	5.04643	5.12777	5.65793	4.88522	5.85151	5.25876	5.43281
COBS02311	8.18459	9.77596	10.6151	9.26455	7.01487	7.4242	8.169	8.58871	8.53087	7.42136	7.40997	9.71814	10.5324	10.953	10.4008	10.1193	9.80643	9.81302	10.8413	10.7957	8.56422	4.00157	9.50628	11.4608
COBS02312	4.36517	5.51326	4.75006	5.50051	5.13166	5.45396	5.95491	5.6448	5.2506	5.02391	5.0648	5.36471	5.21259	4.62407	5.11245	4.96131	5.09339	5.01816	5.01375	5.24034	4.72674	4.00157	5.29745	4.99739
COBS02313	6.84159	7.06964	6.98884	7.4928	7.52111	7.93411	8.113	8.07708	8.18968	7.73904	8.4876	8.82494	6.95641	7.10526	6.59994	8.09981	8.32602	8.06614	8.56361	8.73227	8.51608	4.00157	8.2482	8.64922
COBS02314	4.00157	5.33666	4.83614	5.61929	5.28094	4.00157	4.83244	4.00157	4.37248	4.65614	4.62456	4.83041	4.96909	5.28919	5.05165	4.99619	5.22814	5.35299	5.12777	5.37683	5.01687	4.00157	5.69154	5.50157
COBS02315	11.9172	11.8164	12.4884	10.8493	10.3925	11.288	11.8646	11.9033	11.798	11.8487	11.7976	13.0095	11.1385	12.1398	11.5163	11.3472	10.775	11.4958	11.216	11.4483	12.1176	13.1039	11.9246	12.595
COBS02316	5.83823	6.20688	6.0096	9.24423	9.9817	9.15024	7.57308	7.28217	6.88536	6.95283	7.09092	7.35398	6.34378	5.89544	6.39943	11.0547	9.67767	10.5655	7.01836	7.35618	7.51185	4.00157	6.70414	7.3266
COBS02317	12.2203	11.3948	11.2477	10.6196	8.55746	9.74307	8.71136	7.81723	8.06289	7.76164	8.24892	8.4021	10.7697	11.9814	12.041	11.8753	11.2378	11.8556	8.55969	8.09968	8.01318	8.27652	7.93999	8.59548
COBS02318	14.028	12.768	12.8259	12.4467	14.8837	13.808	13.8874	14.23	14.6997	13.1644	13.117	14.4853	13.2901	13.9445	12.998	14.0694	14.2181	14.0058	14.4574	14.5795	13.9316	13.5047	12.1868	14.15
COBS02319	10.7926	9.96117	11.2965	9.10248	9.52746	9.5712	9.48867	9.7745	9.64059	9.76815	9.7632	9.50622	10.6726	11.3511	10.9653	9.82651	9.77947	9.79571	9.81752	9.7824	9.7999	4.44244	9.98771	9.55758
COBS02320	7.97694	8.0589	7.50487	8.12193	8.20391	8.37216	8.12012	7.98645	7.8786	7.60791	7.5102	7.27095	7.55231	7.83144	7.78402	8.60108	8.70122	8.87129	8.3528	8.2188	8.50379	4.00157	7.83429	7.80259
COBS02321	9.80242	9.4204	9.78756	10.0758	9.75867	11.3663	9.90095	10.5713	10.6029	10.5646	10.2538	10.5978	9.87357	9.87474	9.85004	10.5522	10.1612	10.5321	10.2314	10.4103	10.6169	10.1256	10.1291	10.2127
COBS02322	12.352	13.2842	13.1905	13.4743	12.5695	12.704	11.9803	11.9472	12.0361	12.6797	12.7536	12.0775	13.0517	12.8976	13.1066	12.6641	12.8099	12.6528	12.3196	12.3267	11.9615	12.4294	13.295	12.6968
COBS02323	4.51443	4.84726	4.53377	4.80946	4.81061	4.00157	5.64749	4.00157	4.00157	4.00157	5.22066	4.00157	4.62026	5.06398	5.11245	4.60343	4.45613	4.43587	4.36585	4.45129	4.00157	4.00157	4.00157	4.4872
COBS02324	12.1947	11.6687	12.5667	11.4751	11.2825	11.3926	11.3993	11.4657	11.5358	11.6522	11.7463	11.5375	12.1249	12.4403	12.1777	11.8274	11.6834	11.7219	11.6059	11.507	11.4052	10.9619	11.9755	11.697
COBS02325	7.97104	7.30749	7.31641	10.279	7.49634	10.6456	5.40469	4.60994	4.00157	5.54418	5.0648	4.34381	8.66283	7.87884	7.60555	5.75108	9.35494	7.88382	5.89609	5.31083	4.00157	4.00157	4.90414	4.62658
COBS02326	7.71994	8.02781	9.48196	7.50661	6.8536	7.50417	7.06479	7.69439	7.70449	7.36323	7.35707	7.44002	8.80004	9.37313	9.00162	8.00416	7.92574	8.40264	8.12703	7.61087	7.72544	7.17821	8.51376	8.23712
COBS02328	4.00157	4.99675	5.22022	6.70501	5.18399	4.00157	5.16141	4.00157	4.73743	5.42	4.00157	4.34381	4.96909	4.97491	4.7521	6.32763	5.4329	5.85359	5.44638	5.40836	4.367	4.00157	5.40561	5.25292
COBS02331	7.91689	8.22151	7.41377	8.63142	8.18346	9.02618	10.2699	9.89915	10.1575	8.21838	8.08074	9.41916	7.63114	7.43377	7.61379	7.17518	7.83706	7.4461	9.6283	9.99148	9.59536	8.81066	7.69918	8.84995
COBS02332	6.62926	6.63932	6.13483	11.0793	8.49254	11.0708	8.4712	9.22445	9.22644	7.60791	7.73363	8.61071	6.37114	6.35586	6.33914	8.72987	9.973	9.11169	9.4017	9.82671	9.13345	4.44244	7.68707	9.49421
COBS02333	6.24211	6.18346	6.72332	7.46478	6.9672	8.53924	5.45763	5.86992	4.00157	7.79488	7.64842	5.53709	6.95641	6.56123	5.87526	8.40032	8.35935	8.98682	4.62923	5.65793	4.51701	4.00157	8.98675	6.93986
COBS02334	4.36517	5.42853	5.57248	6.74104	7.49634	5.51907	4.00157	4.70236	4.52469	7.64489	7.21544	4.48445	6.06816	5.52868	5.41429	9.74324	8.65023	8.44573	6.2659	7.83183	5.36893	4.00157	8.84749	7.80655
COBS02335	4.36517	4.38409	4.37895	4.66402	5.84718	4.47832	5.45763	4.00157	4.00157	7.84862	7.53419	5.96192	4.62026	4.62407	4.00157	5.68268	5.77063	5.22321	4.88249	4.89054	4.00157	4.44244	9.58466	7.90587
COBS02336	6.97892	8.76755	7.90262	9.03549	9.7396	8.17423	9.19787	9.09305	9.2892	6.59186	7.18533	7.77034	8.57488	7.80222	7.6859	9.54766	10.8774	9.60289	9.4406	9.68122	9.03165	4.00157	7.3565	8.29453
COBS02337	8.92066	7.95033	8.93679	7.48585	9.98317	7.97534	7.53078	7.68082	6.21646	8.18541	7.69166	6.91251	9.13189	8.65251	7.84121	7.9784	9.90384	7.60378	6.61775	6.69069	7.2001	8.55673	8.35886	7.91323
COBS02338	8.64979	9.17376	8.79703	8.32553	7.32856	8.84955	6.38502	7.2363	6.32054	7.75039	7.40997	7.48483	9.3593	9.26713	9.16109	7.97189	7.98195	8.17514	7.42812	7.20155	7.34616	4.00157	8.65976	7.95662
COBS02339	8.46133	8.73335	9.56622	8.34094	8.02007	7.75616	8.85458	9.17476	9.20577	8.32813	8.59355	9.65793	9.79557	10.1837	9.38581	9.32642	9.08063	9.38445	9.80267	9.92782	9.07932	4.00157	9.08875	10.661
COBS02340	8.43166	7.91677	8.89058	9.53248	9.09968	10.7417	9.86549	9.82137	9.69165	10.015	10.2787	9.49359	8.20156	7.81203	8.0854	9.18205	10.3035	9.16662	10.1736	10.4481	9.95967	10.1754	10.6808	10.0936
COBS02341	9.29678	8.76755	8.87371	8.76012	8.9202	9.63187	9.60204	9.47369	8.60387	10.8454	10.7444	8.8307	9.06088	9.0326	8.68895	8.43145	8.53001	8.99098	8.07837	8.59242	8.91285	12.1616	10.5208	9.73975
COBS02342	9.72081	10.2338	10.2449	9.98569	9.09149	7.86447	9.51584	9.46584	9.21356	10.844	10.9487	9.42678	10.3091	10.0333	10.2047	10.1236	10.0449	10.0774	9.60185	9.79393	9.32703	10.1295	12.1583	10.799
COBS02343	12.0002	11.7282	11.6378	11.8355	12.2921	12.7118	11.8846	11.8207	11.7963	12.1074	11.8377	12.2	11.5901	11.4544	11.7163	11.678	11.655	11.5237	11.4217	11.652	11.8313	12.913	11.7654	11.6013
COBS02344	10.9737	10.2419	10.3065	8.76298	8.43323	9.7206	8.65864	9.10573	9.31356	8.58962	8.68159	9.21212	10.6553	10.9408	10.4196	9.99357	9.28617	9.83322	9.27824	9.14831	9.17791	8.70503	9.08071	9.34766
COBS02345	9.5794	9.44171	9.73253	9.67431	9.82105	9.88453	9.64451	9.64501	9.91814	9.97709	9.72749	9.94457	9.67929	9.8056	9.52695	9.61376	9.67861	9.53622	9.50524	9.51319	9.59921	9.38	10.003	9.45707
COBS02346	11.0341	10.7909	10.8234	10.4214	10.0324	10.6289	10.494	10.2388	10.1124	12.3763	12.6594	10.6605	10.746	11.0081	10.3661	10.998	10.1906	10.9933	11.0138	10.3466	10.4468	13.1594	12.7458	11.8454
COBS02347	5.12576	4.66032	4.53377	5.64717	5.13166	4.00157	4.83244	4.49951	4.00157	5.48382	5.35526	5.06232	4.75649	4.62407	4.7521	4.71169	4.58682	4.98896	4.72447	5.0822	4.51701	4.00157	5.27829	5.22446
COBS02348	8.52694	9.26696	9.27409	8.93005	8.40704	6.6836	8.59374	8.40778	8.94388	8.37272	8.82378	8.87873	9.32605	9.73555	9.16667	9.40802	9.29479	9.58376	9.28063	9.19931	8.56816	8.7763	9.80545	9.39426
COBS02349	9.30146	10.2146	10.8348	9.50543	7.65385	8.68582	7.62423	7.59658	7.02382	9.54979	9.60354	8.28521	10.3821	10.6404	10.4439	9.53561	9.49517	9.80911	9.09252	8.82765	8.10298	9.98889	11.5661	10.4748
COBS02350	12.0277	10.393	10.9234	7.42896	7.46263	7.08809	9.52121	9.31022	8.96249	10.1868	10.4132	9.5609	11.2249	11.7287	11.0754	6.93238	7.20828	7.12817	8.5359	8.26381	9.74709	9.91871	9.18828	8.94608
COBS02351	8.47802	7.70483	7.51367	8.24178	9.46124	9.58288	9.58931	9.83209	10.0515	8.49873	8.39943	9.46982	7.48108	7.67899	7.40144	8.52322	8.69004	8.34092	8.89802	8.86459	9.56023	4.00157	7.40182	7.98134
COBS02352	7.802	8.34254	9.03413	7.69908	6.82704	7.04961	7.09433	7.44405	6.87206	7.63267	7.21544	7.49946	9.25008	9.46569	8.82933	8.21174	8.25946	8.34743	8.22462	8.16444	7.51185	4.00157	8.34741	8.24879
COBS02353	10.325	6.31812	5.49449	11.7535	5.69798	6.95895	10.8376	5.44222	4.00157	8.48526	8.87133	5.98417	13.604	5.85523	6.06607	12.7861	5.91619	6.42784	15.5112	5.88446	5.32561	9.43762	6.67945	6.0014
COBS02354	10.7682	11.2167	10.8365	11.7734	11.744	11.755	10.8643	10.7197	10.7095	10.9097	11.0263	10.5234	10.3982	10.6499	11.0901	11.4496	11.3687	11.5401	10.5703	10.4634	10.8053	10.8869	11.1386	10.6319
COBS02355	8.7999	9.31396	9.58912	8.84894	8.22406	7.92887	8.66837	8.34917	7.43633	7.23926	7.55778	7.96678	9.13573	9.72267	9.89777	9.001	8.99397	9.05061	8.94991	8.83263	8.06996	4.00157	8.06901	8.77942
COBS02356	11.565	9.95624	9.63786	10.8713	12.7331	12.805	11.3986	12.531	12.7833	11.8454	10.6331	12.3713	9.71054	9.88864	9.91775	10.328	10.4296	10.3528	10.1864	10.3396	12.471	11.9851	9.71271	9.97773
COBS02357	12.7738	9.53502	10.2488	11.3449	8.7879	8.99904	13.7136	9.23372	8.99298	12.3713	11.6046	9.95119	13.7527	9.70968	9.39772	12.586	9.15154	9.26256	15.5315	9.26706	9.287	14.8998	11.5312	10.0773
COBS02359	12.7054	12.5157	13.7499	8.16156	8.14697	9.29317	9.07897	9.51229	9.06937	10.4499	10.243	9.6351	12.7582	13.8596	13.432	9.29166	9.38756	9.61191	9.15366	8.78718	9.31068	10.8127	10.7318	9.80524
COBS02360	7.47472	6.55249	8.26098	5.61929	7.52927	5.55026	5.40469	6.1038	5.68767	9.11592	9.3852	6.83299	7.88167	8.41667	7.8482	6.359	6.61209	6.61708	7.04137	6.62162	6.52796	10.2576	11.0777	9.58882
COBS02361	8.91455	8.62145	9.04019	8.62514	8.69722	9.12307	8.40868	8.21018	8.60782	8.79451	9.18155	8.26831	9.07296	8.92872	9.02332	9.21952	9.25241	9.34387	8.72657	8.47941	8.65961	9.39946	9.11709	8.50847
COBS02362	7.94121	8.53583	8.54748	8.46215	7.52927	7.79126	7.07964	6.53711	6.52445	8.23458	8.45047	7.84077	8.57488	8.52166	8.56755	8.05124	7.90004	8.17514	7.0752	7.08815	7.11554	8.52751	8.91623	7.92784
COBS02363	9.38775	8.56638	8.93028	8.42649	9.17135	10.0109	8.82009	9.47954	9.51392	9.85957	9.06372	9.6119	9.18108	9.18688	8.91142	8.54089	8.73241	8.82235	8.37085	8.23396	9.46215	10.9608	9.15367	8.56783
COBS02364	11.2675	10.9297	11.8874	8.76298	8.69001	10.1653	8.09142	8.57051	8.17909	8.61457	7.97994	9.44377	10.2834	11.7203	12.2239	8.47348	8.30906	8.83629	7.93991	8.11614	8.22793	9.56085	8.02888	8.85567
COBS02365	5.31935	5.47171	6.27074	5.21568	4.95404	4.00157	5.08996	4.00157	4.64053	4.00157	4.00157	4.59162	5.13829	5.67973	6.41894	4.96131	4.78259	5.01816	4.36585	5.12426	4.367	4.00157	4.81141	4.4872
COBS02366	12.3073	11.9525	11.6748	12.1442	12.6392	12.6864	11.4829	11.5795	11.5584	12.0864	11.9907	11.7092	11.9057	11.6218	11.6342	12.758	12.3163	12.6704	11.3349	11.379	11.5824	11.8897	11.4007	11.1393
COBS02367	4.72315	4.00157	4.00157	4.80946	5.07627	5.18881	5.01248	5.14499	5.65422	5.02391	5.93575	4.75988	4.00157	4.00157	4.37999	4.38387	4.45613	4.74829	4.72447	4.45129	5.23313	4.00157	4.33579	4.00157
COBS02368	5.62457	6.76775	6.41346	7.45769	6.25246	4.00157	6.67067	5.32512	6.17241	4.79992	6.84219	5.84437	6.28732	6.46245	6.29738	6.3693	6.44879	6.44466	6.18286	6.34785	5.84648	4.00157	5.8535	6.4655
COBS02369	12.6886	12.7396	12.4632	12.9799	12.9631	12.2063	12.5539	12.4059	12.5115	12.89	12.9682	12.4846	12.3797	12.6325	12.6852	12.7834	12.6089	12.6254	12.2007	12.5241	12.5168	12.9113	13.0669	12.6339
COBS02370	11.3563	11.1231	11.4201	10.9455	10.8564	11.0601	11.2169	11.2174	11.5609	10.8945	10.8166	11.3334	11.1375	11.5631	11.3227	10.8717	11.0418	10.7743	11.6002	11.5492	11.2903	11.0931	10.7691	11.4083
COBS02371	12.7393	12.3321	12.044	12.288	12.8477	12.8668	12.1904	12.4026	12.4009	12.7013	12.4594	12.4319	12.0449	11.977	12.0924	12.0728	12.0359	11.992	11.9095	11.8372	12.3953	13.3292	12.3328	11.8444
COBS02372	12.8635	12.9109	14.5036	12.3579	11.1588	11.8752	11.239	11.4344	11.4767	11.7089	11.9392	11.5225	13.5322	14.585	14.2172	13.1352	12.767	13.1727	12.2862	12.1482	11.5193	10.1392	12.6419	12.6511
COBS02373	13.2675	12.7112	12.8648	12.1853	12.0873	12.8177	12.3027	12.2209	12.1271	12.2469	12.3336	12.2502	13.0814	13.3525	13.0053	12.3207	12.3613	12.4422	12.1064	12.1001	12.1219	11.8937	12.0395	12.283
COBS02374	12.0698	11.8803	12.0066	10.6798	10.1889	10.79	10.3293	10.6047	10.6323	10.6664	10.5421	10.7849	12.0767	12.3648	12.2135	11.384	11.2404	11.4361	11.2198	11.1296	10.8111	9.84256	11.0409	11.1353
COBS02375	9.15633	6.79807	9.12815	8.87296	5.52733	9.89393	5.98848	5.09424	4.37248	12.9536	12.7371	10.796	7.24301	4.97491	6.31843	6.0455	4.86276	8.51093	7.55262	6.71297	5.07583	13.1494	13.0288	11.5087
COBS02376	11.6989	11.7301	12.3729	11.2701	10.5893	11.4954	10.9334	11.0616	10.76	11.3149	11.1275	11.0908	12.1369	12.3887	12.0676	11.5538	11.5044	11.8547	11.4979	11.3854	11.1968	11.0486	11.787	11.6759
COBS02377	10.7024	10.585	11.431	10.3746	10.3044	10.953	9.55566	9.75693	9.91336	10.479	10.747	10.1449	11.1433	11.0187	11.1398	10.355	10.465	10.7039	9.66527	9.52245	9.48106	8.30438	10.664	9.98384
COBS02378	9.40528	10.1685	11.0192	6.15793	5.87496	8.75828	7.76752	7.59658	7.0825	7.97956	8.37321	7.52828	8.80488	10.6729	11.9075	8.58414	8.35935	8.44573	8.71603	8.53855	8.06438	9.02642	8.76531	8.45161
COBS02379	9.30847	8.61312	8.98471	7.13122	7.35641	8.05919	9.11141	9.54617	9.53892	9.05803	8.60486	9.91374	9.13573	9.44074	9.25575	7.29039	6.94821	7.19774	8.23944	8.17233	9.35463	8.45485	8.27466	8.97265
COBS02380	9.45451	9.60387	8.90393	10.4545	10.3393	10.0084	11.5684	11.032	11.4707	10.0428	10.4259	11.0513	8.74571	9.15271	9.3882	10.384	10.25	10.2485	11.3884	11.4455	10.7885	10.3883	9.6096	10.8044
COBS02382	7.30618	7.14179	7.14517	8.91727	6.65599	9.8268	7.50916	7.1298	7.40924	9.03513	9.22611	8.35087	6.70536	6.46245	6.78958	7.91189	7.47657	9.03727	7.7866	7.75491	7.0486	10.4704	9.5368	8.86137
COBS02383	13.6739	12.2952	13.281	10.8574	11.0263	11.2639	13.1729	13.2949	13.5076	12.7921	12.7688	14.5323	13.1399	13.3364	12.8055	11.4364	11.1013	10.9438	12.3686	12.6893	12.9819	13.2919	11.7809	14.022
COBS02384	6.4669	5.38358	5.22022	7.3922	4.51723	10.8367	4.00157	4.70236	4.00157	5.75833	6.1474	5.40143	5.13829	4.7611	6.04051	4.27229	4.26473	7.8718	4.36585	4.63505	5.28042	4.44244	4.87445	4.99739
COBS02385	10.9861	10.57	11.1923	10.6477	9.78429	9.8296	10.9172	10.1717	10.0688	9.76537	10.2394	10.0107	10.7918	11.9156	10.5287	10.7589	10.7533	10.6062	11.2674	11.4922	10.5597	10.2289	10.6415	11.1097
COBS02386	8.78658	9.0982	9.49965	8.72241	7.56145	8.20485	7.77658	7.52996	7.83195	7.58271	7.24493	8.29358	9.69239	9.47493	9.12714	9.0695	8.90982	9.10914	8.55969	8.50148	8.06438	8.55094	8.33779	8.60684
COBS02387	12.5312	12.4623	13.2062	7.78637	6.65599	6.89506	9.9947	9.97986	9.9355	10.1253	9.92955	10.5073	12.5907	13.7597	13.5814	7.98164	7.88045	8.15548	10.2078	9.43026	10.5774	5.21712	10.667	10.4648
COBS02388	9.64171	9.2643	9.25598	9.03312	9.53351	10.6949	9.39518	9.8727	10.0659	9.42152	9.04725	9.91915	9.35271	9.35321	9.41423	9.64673	9.56609	9.73261	9.52951	9.33352	10.0692	10.1198	8.83115	9.04289
COBS02389	7.09304	6.62239	6.24904	6.65545	7.07226	8.52892	7.00378	6.95887	6.89853	6.7385	5.93575	7.31308	6.25817	6.32783	6.20969	6.27364	6.48484	6.42784	6.6484	6.48513	7.14785	4.00157	5.78142	6.35825
COBS02390	13.2258	12.7051	12.8599	11.853	11.446	11.5173	12.5245	12.4321	12.4298	12.1864	12.2272	12.6362	12.9016	13.6316	12.6801	11.6894	11.6583	11.7139	12.3059	12.3586	12.3727	12.5915	12.4208	12.8193
COBS02391	5.89297	4.76009	4.75006	4.66402	5.36949	4.00157	5.64749	4.98335	4.00157	5.02391	4.62456	5.15866	4.00157	4.62407	4.53523	4.54066	4.00157	4.25294	5.07255	4.83471	4.00157	4.00157	4.41045	4.78856
COBS02392	7.77517	7.68099	8.20263	7.05765	6.95503	7.57987	7.27254	7.46006	7.17155	6.7385	7.4858	7.51394	8.14151	7.96917	7.55507	7.44496	7.48527	7.54431	7.52047	7.67916	6.74324	4.00157	7.4565	7.39161
COBS02393	7.64032	9.65951	9.07602	10.5568	10.2404	7.91304	9.51853	8.90847	9.005	9.01655	9.74291	8.94392	9.00313	8.80214	9.05976	8.96058	9.15561	8.98959	8.95291	9.23546	9.16238	9.55508	9.71567	9.42793
COBS02395	6.35922	6.63932	6.86937	6.91879	6.27277	6.23667	5.88495	6.49001	6.23794	6.56582	6.32938	5.50469	6.50015	6.801	6.64986	6.74332	6.74329	7.00581	6.77841	7.07969	6.16711	7.97212	7.36415	7.58442
COBS02396	12.7885	12.5188	13.2555	12.3527	12.1793	12.8465	12.8208	12.5404	11.6568	13.256	13.3313	11.8891	12.4945	13.0993	13.3729	13.3651	13.5689	13.3885	13.0965	13.3639	13.066	13.8228	13.4265	13.8552
COBS02397	11.027	10.8993	10.4464	11.4519	12.0543	11.3042	11.569	11.0661	11.4826	11.6656	11.7915	11.0395	10.1737	10.1144	10.4969	11.3174	11.3716	11.08	11.2364	11.2474	10.9205	12.0881	11.6548	11.0149
COBS02398	4.00157	5.23597	4.75006	5.13009	4.88559	5.87142	5.22791	4.49951	4.52469	4.00157	4.87603	4.00157	4.44071	4.62407	4.7521	4.75966	4.89988	5.15144	4.95071	5.20316	4.51701	4.00157	4.84358	4.62658
COBS02399	11.7737	10.9538	11.8009	10.4545	10.3079	11.3042	10.3185	10.5704	10.196	11.6325	11.3366	11.0132	11.3166	11.4419	11.3886	10.9057	10.7533	10.8505	10.622	10.5467	10.5318	12.0414	11.5498	10.9536
COBS02400	11.9339	11.4922	11.423	12.27	12.4591	12.6583	11.9968	11.8534	12.0466	11.5225	11.4966	11.703	10.932	11.1809	11.5934	11.6948	11.7889	11.7774	11.5	11.6513	11.7532	12.2861	11.1695	11.3877
COBS02401	9.48984	8.86551	8.6018	7.4928	8.12032	7.59321	8.33722	8.5334	8.33029	7.76164	8.60486	8.67295	8.91638	9.776	9.64954	8.0666	8.86085	8.05557	8.65846	8.84993	8.69606	9.78947	8.36266	8.1558
COBS02402	10.4663	10.8699	10.7716	10.1387	10.1408	9.62704	10.7704	10.575	10.5362	11.676	11.6865	10.9845	10.6659	10.7447	10.8668	10.2185	10.0139	10.1792	10.7505	10.9218	10.6854	12.4572	12.4599	11.7583
COBS02404	10.3501	9.41082	9.99352	8.16589	8.65707	8.82446	8.54174	8.80957	8.76458	10.2196	10.1613	9.2077	9.92997	9.95619	9.57179	8.54089	8.57121	8.91279	8.24435	8.00114	8.50379	10.0862	9.76735	9.05951
COBS02405	11.0327	9.97098	10.2837	9.85255	10.0424	10.769	9.90095	9.52556	9.97114	10.429	9.81272	9.60856	10.321	10.2922	10.1551	9.57682	9.77155	9.69235	9.51135	9.88415	9.47059	10.561	10.3806	9.85938
COBS02407	9.37447	10.5264	10.1557	11.0016	10.1748	10.8595	9.8781	9.45002	9.74455	9.23723	9.24789	9.29146	10.2677	10.1723	10.3441	10.7777	10.9082	10.9211	10.112	10.1383	9.55826	10.6917	9.74138	9.94234
COBS02408	7.14679	8.00883	7.16775	8.54762	8.33013	7.78547	8.76222	8.66273	7.99199	7.59537	8.01434	8.50299	7.96209	7.49611	7.75454	8.20898	8.34278	8.21842	8.27823	8.65844	8.40149	8.03174	7.99251	8.59091
COBS02409	9.23686	9.04964	8.63021	9.64518	9.02425	10.127	10.6676	10.9613	11.1462	9.71154	10.0166	11.1603	8.78542	8.85978	8.92136	9.41999	9.23459	9.38023	10.2535	10.4722	10.9815	11.0981	9.30127	10.8254
COBS02410	12.4241	12.6461	12.9612	11.1991	10.0979	10.547	11.7051	11.3275	11.2118	11.3357	11.5876	11.2354	12.6543	13.4673	13.2293	11.0366	11.2056	11.1156	12.1347	12.1462	11.6669	10.5127	12.1237	12.2611
COBS02411	10.3535	9.67359	9.98412	8.99958	9.27379	9.89794	9.5995	9.67084	9.05788	9.89559	9.62032	9.1966	9.44852	9.40249	9.53344	9.39958	9.40701	9.376	9.22475	8.98352	9.27019	9.45322	9.33929	8.98837
COBS02412	11.6602	11.8201	12.4262	10.9468	10.5158	12.5546	9.23432	10.0822	9.62121	11.6048	11.1098	10.5757	12.1877	12.0406	12.3386	10.2815	10.3824	10.6572	9.35267	9.22224	9.96714	12.2549	11.2901	10.3775
COBS02413	6.06773	5.73525	5.16646	6.29659	6.31249	5.74787	6.47948	6.42456	6.65557	5.75833	4.62456	6.11007	5.57231	5.21973	5.64962	6.07149	6.30427	6.02565	6.39976	6.47202	6.12271	4.44244	5.15492	5.72324
COBS02414	9.10898	9.6268	9.97151	9.11819	8.73629	8.56978	8.26202	8.51067	7.91101	9.00716	8.97944	8.66007	9.70796	9.55557	9.64754	9.72309	9.68705	9.7515	9.34813	9.34923	8.5877	7.95462	10.1996	9.4021
COBS02415	13.129	12.6029	12.3085	12.2345	12.3233	12.4707	12.3514	12.0156	12.1734	12.1936	12.2774	12.2641	12.5299	12.4772	12.5963	11.7666	11.7667	11.8884	11.7024	11.7824	12.1937	12.194	11.9415	11.8848
COBS02416	9.82212	9.23475	9.45047	10.3233	10.6812	10.7238	10.593	10.5868	10.7377	10.2054	10.2394	10.355	8.83357	8.92872	9.14421	9.55853	9.86384	9.61101	9.82244	10.226	10.4521	11.064	9.94536	9.93965
COBS02419	4.94899	4.76009	4.00157	4.80946	5.01729	4.00157	4.59308	5.40459	4.00157	4.00157	4.00157	4.00157	4.00157	4.00157	4.00157	4.88682	4.64182	4.00157	5.40639	4.83471	4.367	4.00157	4.33579	4.00157
COBS02421	4.00157	4.54097	4.00157	4.00157	4.00157	4.00157	4.00157	7.32659	4.00157	9.98905	7.96243	4.59162	4.44071	4.44343	4.00157	4.00157	4.00157	4.25294	4.00157	4.00157	4.00157	4.00157	4.33579	4.28283
COBS02427	5.83823	5.23597	5.57248	4.33497	4.00157	4.00157	7.19308	6.3733	5.84223	4.00157	4.00157	5.32668	5.34641	5.47355	5.78365	4.00157	4.37323	4.00157	7.9031	7.84673	6.47705	4.00157	4.33579	6.76919
COBS02435	4.36517	4.38409	4.00157	4.00157	5.18399	6.50773	4.42128	4.49951	4.89811	5.11707	4.00157	5.11173	4.00157	4.00157	4.37999	4.00157	4.00157	4.00157	4.00157	4.00157	4.51701	4.00157	4.41045	4.00157
COBS02438	6.41414	4.00157	4.00157	4.33497	5.81877	8.14745	5.45763	6.47395	6.43557	7.03011	4.62456	6.29608	4.75649	4.44343	4.37999	4.60343	4.37323	4.43587	5.36487	4.45129	6.23101	8.73601	4.93277	4.78856
COBS02444	4.62807	4.54097	4.53377	5.61929	7.61608	4.00157	6.56778	7.1298	7.65168	5.80636	4.87603	6.00603	4.75649	4.44343	4.37999	5.18094	4.96936	5.01816	5.69245	5.79884	7.59186	8.26947	4.74242	5.10156
COBS02445	6.99076	6.20688	6.47026	4.87236	5.18399	4.58417	6.11458	6.65526	5.65422	7.03011	6.95426	6.12991	6.06816	5.58125	6.35954	5.18094	4.69219	4.61349	5.72372	5.16451	6.35022	4.00157	5.55001	5.50157
COBS02448	11.5154	10.7526	11.1752	10.1863	10.5015	11.9225	10.617	11.2457	11.2208	11.2389	10.6549	11.2797	11.0829	11.3511	11.2117	10.5231	10.4791	10.6147	10.5238	10.3818	10.9614	11.8602	10.5568	10.5775
COBS02449	11.3076	10.0594	9.56832	10.673	10.5219	11.2997	13.9146	14.3741	14.9607	12.3561	12.128	14.376	10.3243	10.2729	9.82203	10.7091	10.5793	10.0852	13.0839	13.3187	14.3446	13.7508	10.4812	13.5037
COBS02450	12.7217	12.6621	12.4259	12.0205	11.4053	11.3557	13.0096	12.7953	12.5438	12.0651	12.2444	12.2351	12.5123	12.6779	12.0968	12.0035	12.3843	11.9039	13.0481	13.2876	12.6375	12.6159	12.6303	12.6815
COBS02451	10.938	10.5722	10.4407	10.6165	10.9812	10.7477	10.4198	10.7912	10.704	10.7002	10.3272	10.6045	10.782	10.9835	10.6097	10.4315	10.3922	10.2386	10.2619	10.2522	10.8094	10.6691	10.6008	10.1925
COBS02452	8.74241	9.22385	9.41128	8.59013	7.71941	7.91304	7.4872	11.2174	7.42735	13.9954	13.3469	7.95625	9.5528	9.168	9.21594	8.66087	8.59338	9.01159	8.37979	8.58062	8.12458	9.59782	8.94435	8.72833
COBS02453	7.6915	9.60807	8.07829	11.1611	12.5009	11.7151	10.3369	9.73914	10.4587	10.7711	12.0099	9.53646	8.80488	7.89737	8.68506	12.3613	12.3526	12.2393	11.7423	11.6956	8.6633	4.00157	7.57973	9.41765
COBS02454	10.5325	11.1032	10.756	11.6407	11.4092	10.5169	11.6932	10.9494	11.1883	11.2518	11.6638	11.0426	10.5755	10.4966	10.7407	11.0608	11.1799	11.0868	11.1582	11.403	11.0887	11.4711	11.9741	11.6371
COBS02455	9.69966	9.56123	10.3679	8.80798	8.76747	8.93277	9.01181	8.72656	8.32069	9.29619	9.45549	9.12347	10.374	10.1104	9.68495	9.29816	9.1529	9.33518	9.22475	9.03627	8.56422	7.98941	9.64739	9.24823
COBS02456	12.7295	10.8336	12.2303	8.59335	8.77431	11.5559	11.8694	12.618	12.3015	12.2213	11.995	12.6892	12.5138	13.0258	12.1346	10.8577	10.7838	10.6899	12.2957	11.8044	12.7105	13.4219	11.5209	11.9908
COBS02457	6.32132	6.00651	5.8105	7.00962	7.35641	6.85078	7.68329	7.17921	7.489	6.82824	6.72027	6.71085	6.03359	5.89544	5.87526	7.31131	7.49392	7.12306	7.52047	7.73367	7.76732	4.44244	6.34984	7.77859
COBS02458	4.00157	5.92249	5.10952	5.70102	4.63148	4.33945	4.72355	5.14499	4.37248	5.75833	4.87603	4.89485	5.96153	5.21973	5.16953	4.84678	4.86276	5.33246	4.80775	5.37683	5.69732	4.44244	5.81799	5.47912
COBS02459	10.1786	10.044	10.2799	9.58993	9.59849	9.87235	9.45537	9.82903	9.59761	9.59431	9.69617	10.0383	10.3917	10.566	10.4278	10.2483	9.99509	10.308	9.86119	9.80029	9.80658	8.47336	9.80127	9.64164
COBS02460	10.1333	9.93135	10.285	10.265	10.0773	9.78265	9.39225	9.08026	9.46475	8.5959	8.60486	9.20549	9.798	10.492	10.131	9.59277	9.41946	9.84091	9.29721	9.21464	9.18049	4.62267	8.27062	9.00047
COBS02461	8.54288	9.20735	8.93679	9.6969	9.63085	8.88503	8.84603	8.92	9.19794	8.60215	7.7744	8.99608	8.89385	8.69537	9.18603	9.76592	9.5005	9.10276	9.27585	9.25598	9.07656	4.00157	9.0339	8.44402
COBS02462	5.94541	7.22154	6.84136	7.55391	7.01487	7.49708	7.39578	6.49001	6.87206	5.75833	5.58241	6.632	6.42424	6.76039	6.81879	7.01807	7.19236	7.20741	7.09731	7.00115	7.14785	8.24811	6.93983	7.02483
COBS02463	12.2335	12.458	11.7519	12.7838	13.3985	12.5891	13.0585	12.965	13.1656	12.6017	12.8599	12.78	11.9966	11.8725	12.0658	12.1948	12.1465	11.9175	12.2113	12.3057	12.8729	13.35	12.2809	12.2716
COBS02464	4.00157	5.89318	6.64406	10.9895	7.55347	6.4637	7.32313	5.19318	5.78275	4.91966	6.80273	4.75988	7.52896	7.13707	6.20969	8.76598	8.94156	10.3163	7.29162	7.98328	5.01687	4.44244	6.46399	7.72934
COBS02465	4.36517	5.83242	5.77925	5.96082	4.72705	4.00157	5.01248	5.28301	4.37248	4.00157	4.87603	4.59162	5.21259	4.7611	5.16953	5.51245	5.22814	5.37313	5.22942	5.12426	5.78899	4.00157	5.17658	5.4562
COBS02466	8.94784	9.72085	9.90835	9.39923	9.23468	8.41392	9.16046	9.78872	9.2213	9.4564	9.07188	9.79077	9.6634	9.45327	9.93746	9.54439	9.47471	9.48608	9.5632	9.37505	9.73664	4.00157	9.84732	9.25835
COBS02467	7.64032	7.95695	10.5208	8.26217	7.60068	8.37601	7.19308	7.2363	7.74826	6.76149	6.48944	7.40155	8.97336	8.15756	8.44877	9.17217	8.95718	9.20648	8.72657	7.99224	7.64531	4.00157	7.21112	7.23499
COBS02468	7.0025	6.94045	6.55993	6.75284	6.35106	4.94265	6.0842	5.14499	4.00157	5.80636	6.38488	5.01005	6.92062	6.56123	7.1964	4.92491	4.64182	5.10042	4.95071	4.83471	4.72674	4.00157	5.69154	5.43281
COBS02469	10.2924	10.9751	11.0719	12.1863	12.2183	11.6476	9.97133	8.8433	9.33988	8.66321	8.88992	9.30185	10.4282	10.8106	11.1256	13.3609	12.8179	13.1622	11.2284	11.4479	8.99118	4.44244	8.97936	9.36515
COBS02470	6.0202	5.62952	5.45337	8.49006	10.4512	8.33707	6.22949	4.92207	6.70167	4.79992	6.1474	5.20339	6.03359	6.04452	4.9158	10.688	8.86748	10.6572	6.98311	6.91793	5.95402	5.06167	4.57792	8.6293
COBS02471	9.39435	10.8585	12.8007	9.72208	10.2527	7.46838	8.60898	5.73421	4.82212	4.91966	5.0648	5.06232	13.8662	14.1348	11.5109	7.79122	9.91347	8.153	7.68168	8.03619	4.81027	4.00157	4.00157	4.68519
COBS02472	4.00157	4.00157	4.65157	4.74063	4.81061	4.00157	5.01248	4.00157	4.00157	5.54418	4.00157	4.34381	4.00157	4.44343	4.00157	4.46911	4.52574	4.43587	4.00157	4.89054	4.00157	4.00157	4.90414	5.1338
COBS02473	6.43195	5.0626	5.36619	8.12193	10.4405	9.27477	10.7211	11.8747	12.0368	9.87769	10.0335	12.0705	6.34378	6.38331	5.45709	8.4409	10.4796	7.91049	11.3159	11.9662	11.1325	7.9634	7.26126	12.5781
COBS02474	4.62807	4.54097	4.37895	5.70102	9.56735	8.30917	6.58899	6.45769	6.68647	5.42	8.23442	6.632	5.13829	5.21973	4.00157	6.45857	9.03428	6.34044	6.63316	7.57546	6.47705	4.00157	4.66564	7.00407
COBS02475	5.5557	4.99675	4.37895	5.13009	5.72933	4.00157	5.77203	5.73421	5.75188	4.91966	4.00157	5.43694	5.40739	4.97491	4.7521	6.14646	6.82892	5.62209	6.32492	6.25816	4.367	4.00157	4.41045	4.99739
COBS02476	4.80628	9.71697	5.53415	5.87255	11.2492	6.33873	6.43308	5.73421	5.95326	5.80636	6.08065	5.56859	9.07696	7.67899	5.32321	7.51859	7.79581	7.29153	5.94859	5.58066	6.23101	4.00157	4.77775	5.22446
COBS02477	5.07063	4.99675	5.22022	6.34505	12.4599	6.76972	5.29025	4.35454	4.82212	4.46639	5.47464	4.00157	4.96909	4.97491	4.8384	9.25069	8.09099	9.38129	5.07255	5.16451	4.00157	4.00157	4.62342	4.4872
COBS02478	10.3041	11.1377	10.8486	14.0525	13.9676	13.7356	13.0916	12.5173	12.8468	11.3404	11.631	12.6092	9.67401	10.3652	11.1714	13.8783	13.6168	13.7125	13.0724	13.1571	12.5009	12.0955	10.8856	12.3197
COBS02479	4.94899	4.92543	4.37895	5.50051	5.32615	4.6728	4.00157	4.92207	4.00157	5.20178	5.47464	4.75988	4.62026	4.62407	4.7521	4.65994	4.58682	4.74829	4.72447	4.70844	4.00157	7.36317	5.40561	5.16497
COBS02480	4.88089	5.0626	4.9838	8.02018	8.19882	4.00157	6.63044	5.6448	6.19462	4.79992	5.35526	6.27862	5.21259	4.44343	5.36972	6.3693	6.75064	6.28511	6.57046	6.56127	6.18876	8.27652	4.93277	5.84544
COBS02481	4.00157	5.76851	5.49449	8.20434	7.58512	4.00157	5.95491	4.85579	5.5099	4.79992	5.58241	5.06232	4.44071	4.44343	5.22342	6.47763	6.68311	6.57977	6.69311	7.0366	5.81807	4.00157	4.98721	6.08653
COBS02482	4.00157	5.42853	4.75006	7.85793	7.30969	4.00157	6.60987	5.76259	6.12683	5.27975	4.62456	5.65824	4.44071	4.7611	5.32321	6.48706	6.62819	6.34944	6.4878	6.56127	6.16711	4.00157	4.66564	5.60759
COBS02483	6.84159	7.75894	7.54832	8.11745	7.60068	6.99997	7.53078	7.19849	7.53979	7.37799	6.63256	7.43241	7.74683	7.55582	7.82003	8.24988	8.33562	8.24888	8.16893	8.16839	8.03616	4.00157	8.23167	8.01592
COBS02484	8.68612	8.64617	8.84975	7.59323	7.91226	7.65811	7.77658	7.82956	8.00406	8.41596	8.27748	7.88031	9.4046	9.19436	8.51597	7.71905	7.78179	7.85969	7.73161	7.99669	7.63779	4.44244	8.22334	7.73351
COBS02485	6.8151	6.5703	6.73864	7.98131	7.79566	8.95862	7.81226	8.02982	7.90458	6.87102	5.93575	7.32135	6.78756	6.00886	6.61678	7.37724	7.41866	8.03688	7.24302	7.41091	7.76043	4.44244	6.25947	6.43422
COBS02486	8.13806	8.60052	7.90928	9.22984	9.32357	8.41766	9.51314	9.24293	9.74275	8.24261	8.06443	8.96763	8.20156	8.26118	7.99392	9.35289	9.55485	9.08472	9.78262	9.66457	9.45792	4.00157	8.15703	8.87834
COBS02487	8.53891	8.22151	8.76445	7.99112	7.7684	7.32348	8.28119	8.42004	8.34457	7.59537	8.46296	8.03837	8.74571	9.01157	8.94103	8.09083	8.38732	8.56217	8.11636	8.24523	8.329	5.57798	7.84249	8.09567
COBS02488	11.3186	11.3954	11.2749	12.1149	12.1355	12.3956	11.067	11.012	11.204	11.7161	11.6597	11.3135	11.0568	10.976	11.1852	11.8714	11.7309	11.8953	10.8177	10.8071	10.5538	11.1363	11.4719	11.068
COBS02489	9.57166	9.14517	10.5444	9.08431	7.59292	7.88084	10.2327	8.00287	8.08008	8.62074	8.8043	8.20756	10.057	10.7873	9.17776	9.51344	9.14065	9.50557	10.9222	9.28895	7.87972	9.41229	9.21789	9.25258
COBS02490	9.85118	9.91451	10.1626	9.99666	9.97133	10.6264	9.03455	9.52367	9.06937	9.90824	10.1574	9.44377	10.2834	10.2426	10.0534	9.75746	9.85471	10.1492	9.16919	8.93805	9.35007	10.0165	10.3268	9.57618
COBS02492	8.06807	7.32818	7.14517	6.39182	6.18956	7.74426	8.12012	8.50685	7.72654	8.21838	7.4858	8.78694	7.68489	8.26118	6.54813	6.52414	6.26293	6.41935	7.39298	7.07118	8.56816	4.44244	7.59279	7.57514
COBS02493	10.6335	9.90772	9.95718	8.51064	8.21402	7.99551	10.32	10.1729	9.50971	9.94798	10.0039	10.5808	10.243	11.0633	9.42591	9.33023	8.85586	8.59533	10.37	10.0288	10.3369	8.59104	10.6811	10.6842
COBS02494	7.23865	7.41772	7.31641	6.29659	5.72933	6.18252	6.25671	6.40769	4.89811	6.8498	7.18533	7.20978	8.01329	8.88775	7.15155	6.10952	5.65727	5.84035	6.24563	5.98381	6.21005	4.00157	8.20228	7.53263
COBS02495	12.2749	13.1223	12.6388	11.5269	11.3069	9.93745	11.6795	10.3485	9.81957	11.9945	12.4461	10.8337	12.9769	13.0545	12.2232	9.63034	9.62002	10.4113	10.018	10.5841	10.4187	12.1138	12.4835	11.8713
COBS02497	5.59065	6.11057	5.77925	5.4024	6.46052	4.33945	5.77203	4.70236	4.00157	4.00157	5.58241	4.75988	5.67034	5.58125	5.68457	4.27229	4.00157	4.25294	4.00157	4.45129	4.00157	4.00157	4.70516	4.4872
COBS02498	9.2393	8.22151	6.96316	6.19399	7.63131	7.52522	7.76752	6.95887	6.8036	6.71512	6.63256	7.19181	7.6743	7.12126	7.14011	5.31168	5.56907	5.24602	5.52226	5.88446	6.8787	4.00157	6.38124	5.56635
COBS02499	4.00157	5.12398	4.37895	5.33168	5.18399	6.4487	5.40469	4.85579	4.52469	4.79992	4.00157	4.68136	5.28168	4.62407	4.53523	4.60343	5.03355	4.92735	4.62923	4.83471	4.72674	4.00157	4.66564	4.83505
COBS02501	9.81886	9.55906	9.62381	9.04257	9.25437	9.94134	8.50418	8.84934	8.78215	10.1722	9.64787	9.29146	9.84334	9.28476	9.23995	9.46111	8.98334	8.99512	10.1877	8.59829	8.55631	11.4495	9.99871	8.9335
COBS02502	9.50211	9.87676	10.4281	9.60594	8.7879	8.40265	10.4981	10.619	10.8367	10.0451	10.1803	12.0059	10.4669	10.8502	10.0624	10.2907	10.1646	10.0458	11.2662	11.4588	10.6178	8.76634	10.6636	12.7504
COBS02503	10.7374	10.8576	11.0652	10.3482	9.81112	11.9037	8.40286	9.08539	8.97476	11.1297	10.4636	9.66921	11.1007	10.6702	10.8753	9.36036	9.80987	9.93303	8.41501	8.21498	9.41923	11.9034	10.418	9.4394
COBS02504	9.60237	9.2563	9.65177	8.89398	8.81469	9.5712	8.69717	9.05693	9.0258	9.74577	9.68025	9.09266	9.62838	9.18688	9.36655	9.20437	9.25494	9.33845	8.9439	8.88151	8.8102	9.71377	9.67433	9.04956
COBS02505	4.36517	4.92543	4.00157	4.80946	4.36716	4.00157	4.00157	4.00157	5.34422	4.65614	4.00157	4.48445	4.00157	4.44343	4.53523	4.27229	4.45613	4.00157	4.62923	4.32021	4.00157	4.44244	4.23816	4.4872
COBS02506	10.5834	9.98717	10.576	8.97513	8.54551	8.82727	8.63898	8.8433	8.1414	9.31151	9.00525	8.96501	11.0063	11.1818	10.7407	9.33023	9.1771	9.32095	9.30192	8.81513	8.8102	9.45322	9.97042	9.44573
COBS02507	9.6764	8.55772	9.24028	8.37128	9.06942	9.87642	8.76222	9.19152	9.29899	9.14615	9.21141	9.55222	9.39501	9.52326	9.3738	8.61365	8.72878	8.96585	8.56753	8.42434	8.88471	9.25022	8.45806	8.48402
COBS02508	9.04611	8.54024	8.1863	8.62514	8.53749	8.43251	8.4712	8.9343	8.947	8.99772	8.41236	9.29978	8.82883	8.41667	8.52469	9.03098	8.80153	8.97568	9.07063	8.97229	9.08482	4.87342	8.59185	8.65799
COBS02509	8.88361	7.937	7.45092	8.01537	8.60429	8.69508	8.29384	8.89975	8.97782	9.15891	8.734	9.55048	8.46905	8.11075	8.02507	8.77347	8.18436	8.50318	8.62503	8.68623	9.26292	10.3253	8.14604	8.54201
COBS02510	11.6213	10.6082	10.4913	10.8317	11.5561	11.6256	11.6405	11.9923	11.9279	11.6649	11.4783	11.8383	10.761	10.8455	10.5629	11.0194	10.9446	10.8471	11.1354	11.0639	11.9991	10.8823	11.1695	10.8997
COBS02511	9.16665	8.72177	7.84124	7.7463	7.82902	8.28072	8.40286	7.8418	8.21064	7.60791	7.15456	8.14412	8.25212	8.67944	9.39535	7.69944	7.61771	7.79432	7.74555	7.85167	7.82793	4.44244	7.59603	8.04969
COBS02512	7.81523	7.23258	7.17891	7.91064	8.50905	7.93933	7.93862	8.0615	8.18968	7.39259	7.1231	7.64462	7.19912	6.91612	7.3529	7.82778	7.80969	7.90756	7.87168	8.03619	7.46159	8.07285	6.87648	7.31547
[truncated: 13,665 more rows]
