# Supplementary material for: Metabolic plasticity supports a flexible nutritional symbiosis in Cardiocondyla ants
Source: Research Square preprint supplement (doi:10.21203/rs.3.rs-7898267/v1), 2025-11-10
Supplement: Supplementary file 7 [file Table-S6-ColonyFitness.xlsx]

## Sheet: 1-Colony-Mortality
For plotting					For statistical analysis
TIME	COLONY_MORTALITY	SYMBIOTIC_STATUS	DIET		COLONY_NAME	BLOCK	SYMBIOTIC_STATUS	DIET	TIME	SURVIVAL_STATUS	MORTALITY_STATUS
0	7	Symbiotic	Control		JP2011 6-26	III	Symbiotic	Ctrl	12	1	0
1	7	Symbiotic	Control		JP2011 5-26	III	Symbiotic	LP	12	1	0
2	7	Symbiotic	Control		JP2011 6-26	III	Symbiotic	NP	12	1	0
3	7	Symbiotic	Control		JP2011 3-31	III	Aposymbiotic	Ctrl	12	1	0
4	7	Symbiotic	Control		JP2011 6-31	III	Aposymbiotic	LP	12	1	0
5	7	Symbiotic	Control		JP2011 3-31	III	Aposymbiotic	NP	12	0	1
6	7	Symbiotic	Control		JP2011 2-26	I	Symbiotic	Ctrl	12	1	0
7	7	Symbiotic	Control		JP2011 5-26	I	Symbiotic	Ctrl	12	1	0
8	7	Symbiotic	Control		JP2011 3-26	I	Symbiotic	LP	12	1	0
9	7	Symbiotic	Control		JP2011 6-26	I	Symbiotic	LP	3	0	1
10	7	Symbiotic	Control		JP2011 4-26	I	Symbiotic	NP	12	1	0
11	7	Symbiotic	Control		JP2011 2-26	I	Symbiotic	NP	12	1	0
12	7	Symbiotic	Control		JP2011 2-31	I	Aposymbiotic	Ctrl	6	0	1
0	7	Symbiotic	Low Protein		JP2011 5-31	I	Aposymbiotic	Ctrl	10	0	1
1	7	Symbiotic	Low Protein		JP2011 3-31	I	Aposymbiotic	LP	10	0	1
2	7	Symbiotic	Low Protein		JP2011 6-31	I	Aposymbiotic	LP	12	1	0
3	7	Symbiotic	Low Protein		JP2011 4-31	I	Aposymbiotic	NP	6	0	1
4	7	Symbiotic	Low Protein		JP2011 2-31	I	Aposymbiotic	NP	7	0	1
5	6	Symbiotic	Low Protein		JP2011 1-26	II	Symbiotic	Ctrl	12	1	0
6	6	Symbiotic	Low Protein		JP2011 6-26	II	Symbiotic	Ctrl	12	1	0
7	6	Symbiotic	Low Protein		JP2011 1-26	II	Symbiotic	LP	12	1	0
8	6	Symbiotic	Low Protein		JP2011 5-26	II	Symbiotic	LP	10	0	1
9	6	Symbiotic	Low Protein		JP2011 6-26	II	Symbiotic	NP	12	1	0
10	6	Symbiotic	Low Protein		JP2011 3-26	II	Symbiotic	NP	10	0	1
11	6	Symbiotic	Low Protein		JP2011 5-31	II	Aposymbiotic	Ctrl	12	1	0
12	6	Symbiotic	Low Protein		JP2011 6-31	II	Aposymbiotic	Ctrl	9	0	1
0	7	Symbiotic	No Protein		JP2011 2-31	II	Aposymbiotic	LP	12	1	0
1	7	Symbiotic	No Protein		JP2011 5-31	II	Aposymbiotic	LP	12	1	0
2	7	Symbiotic	No Protein		JP2011 6-31	II	Aposymbiotic	NP	12	1	0
3	7	Symbiotic	No Protein		JP2011 3-31	II	Aposymbiotic	NP	10	0	1
4	7	Symbiotic	No Protein		JP2011 2-26	IV	Symbiotic	Ctrl	12	1	0
5	7	Symbiotic	No Protein		JP2011 6-26	IV	Symbiotic	Ctrl	10	0	1
6	7	Symbiotic	No Protein		JP2011 2-26	IV	Symbiotic	LP	12	1	0
7	6	Symbiotic	No Protein		JP2011 6-26	IV	Symbiotic	LP	12	1	0
8	6	Symbiotic	No Protein		JP2011 1-26	IV	Symbiotic	NP	12	1	0
9	6	Symbiotic	No Protein		JP2011 6-26	IV	Symbiotic	NP	12	1	0
10	6	Symbiotic	No Protein		JP2011 1-31 A	IV	Aposymbiotic	Ctrl	12	1	0
11	6	Symbiotic	No Protein		JP2011 6-31 B	IV	Aposymbiotic	Ctrl	6	0	1
12	6	Symbiotic	No Protein		JP2011 1-31 A	IV	Aposymbiotic	LP	7	0	1
0	7	Aposymbiotic	Control		JP2011 1-31 B	IV	Aposymbiotic	LP	12	1	0
1	7	Aposymbiotic	Control		JP2011 1-31 A	IV	Aposymbiotic	NP	10	0	1
2	7	Aposymbiotic	Control		JP2011 1-31 B	IV	Aposymbiotic	NP	4	0	1
3	7	Aposymbiotic	Control
4	7	Aposymbiotic	Control
5	7	Aposymbiotic	Control
6	6	Aposymbiotic	Control
7	5	Aposymbiotic	Control
8	5	Aposymbiotic	Control
9	5	Aposymbiotic	Control
10	4	Aposymbiotic	Control
11	4	Aposymbiotic	Control
12	4	Aposymbiotic	Control
0	7	Aposymbiotic	Low Protein
1	7	Aposymbiotic	Low Protein
2	7	Aposymbiotic	Low Protein
3	7	Aposymbiotic	Low Protein
4	7	Aposymbiotic	Low Protein
5	7	Aposymbiotic	Low Protein
6	7	Aposymbiotic	Low Protein
7	6	Aposymbiotic	Low Protein
8	6	Aposymbiotic	Low Protein
9	6	Aposymbiotic	Low Protein
10	5	Aposymbiotic	Low Protein
11	5	Aposymbiotic	Low Protein
12	5	Aposymbiotic	Low Protein
0	7	Aposymbiotic	No Protein
1	7	Aposymbiotic	No Protein
2	7	Aposymbiotic	No Protein
3	7	Aposymbiotic	No Protein
4	7	Aposymbiotic	No Protein
5	6	Aposymbiotic	No Protein
6	6	Aposymbiotic	No Protein
7	6	Aposymbiotic	No Protein
8	6	Aposymbiotic	No Protein
9	4	Aposymbiotic	No Protein
10	3	Aposymbiotic	No Protein
11	3	Aposymbiotic	No Protein
12	3	Aposymbiotic	No Protein

## Sheet: 2-Pupae-Size
Sample	ColonyType	PupaeSize
SYM_PUP_1	Symbiotic	0.15
SYM_PUP_2	Symbiotic	0.15
SYM_PUP_3	Symbiotic	0.14
SYM_PUP_4	Symbiotic	0.14
SYM_PUP_5	Symbiotic	0.143
SYM_PUP_6	Symbiotic	0.15
APO_PUP_1	Aposymbiotic	0.137
APO_PUP_2	Aposymbiotic	0.14
APO_PUP_3	Aposymbiotic	0.14
APO_PUP_4	Aposymbiotic	0.14
APO_PUP_5	Aposymbiotic	0.15
APO_PUP_6	Aposymbiotic	0.135

## Sheet: 3-Brood-Production
ORIGINAL_ORDER	COLONY	COLONY_NAME	STATUS	DIET	WEEK	BLOCK	METRIC	MEASURMENT	VALUE
1	2	JP2011 2-26	Symbiotic	Ctrl	WEEK 0	1	EGGS	AVERAGE	6
2	5	JP2011 5-26	Symbiotic	Ctrl	WEEK 0	1	EGGS	AVERAGE	6
3	3	JP2011 3-26	Symbiotic	LP	WEEK 0	1	EGGS	AVERAGE	8
4	6	JP2011 6-26	Symbiotic	LP	WEEK 0	1	EGGS	AVERAGE	10
5	4	JP2011 4-26	Symbiotic	NP	WEEK 0	1	EGGS	AVERAGE	8
6	2	JP2011 2-26	Symbiotic	NP	WEEK 0	1	EGGS	AVERAGE	5
7	2	JP2011 2-31	Aposymbiotic	Ctrl	WEEK 0	1	EGGS	AVERAGE	7
8	5	JP2011 5-31	Aposymbiotic	Ctrl	WEEK 0	1	EGGS	AVERAGE	11
9	3	JP2011 3-31	Aposymbiotic	LP	WEEK 0	1	EGGS	AVERAGE	12
10	6	JP2011 6-31	Aposymbiotic	LP	WEEK 0	1	EGGS	AVERAGE	6
11	4	JP2011 4-31	Aposymbiotic	NP	WEEK 0	1	EGGS	AVERAGE	10
12	2	JP2011 2-31	Aposymbiotic	NP	WEEK 0	1	EGGS	AVERAGE	8
13	1	JP2011 1-26	Symbiotic	Ctrl	WEEK 0	2	EGGS	AVERAGE	15
14	6	JP2011 6-26	Symbiotic	Ctrl	WEEK 0	2	EGGS	AVERAGE	14
15	1	JP2011 1-26	Symbiotic	LP	WEEK 0	2	EGGS	AVERAGE	19
16	5	JP2011 5-26	Symbiotic	LP	WEEK 0	2	EGGS	AVERAGE	12
17	6	JP2011 6-26	Symbiotic	NP	WEEK 0	2	EGGS	AVERAGE	18
18	3	JP2011 3-26	Symbiotic	NP	WEEK 0	2	EGGS	AVERAGE	13
19	3	JP2011 5-31	Aposymbiotic	Ctrl	WEEK 0	2	EGGS	AVERAGE	19
20	6	JP2011 6-31	Aposymbiotic	Ctrl	WEEK 0	2	EGGS	AVERAGE	13
21	2	JP2011 2-31	Aposymbiotic	LP	WEEK 0	2	EGGS	AVERAGE	13
22	5	JP2011 5-31	Aposymbiotic	LP	WEEK 0	2	EGGS	AVERAGE	11
23	6	JP2011 6-31	Aposymbiotic	NP	WEEK 0	2	EGGS	AVERAGE	8
24	3	JP2011 3-31	Aposymbiotic	NP	WEEK 0	2	EGGS	AVERAGE	13
25	3	JP2011 5-31	Symbiotic	Ctrl	WEEK 0	3	EGGS	AVERAGE	19.3333
26	2	JP2011 2-31	Symbiotic	LP	WEEK 0	3	EGGS	AVERAGE	20.6667
27	6	JP2011 6-31	Symbiotic	NP	WEEK 0	3	EGGS	AVERAGE	20
28	6	JP2011 6-31	Aposymbiotic	Ctrl	WEEK 0	3	EGGS	AVERAGE	10.6667
29	5	JP2011 5-31	Aposymbiotic	LP	WEEK 0	3	EGGS	AVERAGE	9.33333
30	3	JP2011 3-31	Aposymbiotic	NP	WEEK 0	3	EGGS	AVERAGE	19.3333
31	2	JP2011 2-26	Symbiotic	Ctrl	WEEK 0	4	EGGS	AVERAGE	0
32	6	JP2011 6-26	Symbiotic	Ctrl	WEEK 0	4	EGGS	AVERAGE	14
33	2	JP2011 2-26	Symbiotic	LP	WEEK 0	4	EGGS	AVERAGE	3
34	6	JP2011 6-26	Symbiotic	LP	WEEK 0	4	EGGS	AVERAGE	10
35	1	JP2011 1-26	Symbiotic	NP	WEEK 0	4	EGGS	AVERAGE	19
36	6	JP2011 6-26	Symbiotic	NP	WEEK 0	4	EGGS	AVERAGE	6
37	1	JP2011 1-31 A	Aposymbiotic	Ctrl	WEEK 0	4	EGGS	AVERAGE	9
38	6	JP2011 6-31 B	Aposymbiotic	Ctrl	WEEK 0	4	EGGS	AVERAGE	0
39	1	JP2011 1-31 A	Aposymbiotic	LP	WEEK 0	4	EGGS	AVERAGE	3
40	1	JP2011 1-31 B	Aposymbiotic	LP	WEEK 0	4	EGGS	AVERAGE	10
41	1	JP2011 1-31 A	Aposymbiotic	NP	WEEK 0	4	EGGS	AVERAGE	7
42	1	JP2011 1-31 B	Aposymbiotic	NP	WEEK 0	4	EGGS	AVERAGE	10
43	2	JP2011 2-26	Symbiotic	Ctrl	WEEK 3	1	EGGS	AVERAGE	16
44	5	JP2011 5-26	Symbiotic	Ctrl	WEEK 3	1	EGGS	AVERAGE	4
45	3	JP2011 3-26	Symbiotic	LP	WEEK 3	1	EGGS	AVERAGE	3
46	6	JP2011 6-26	Symbiotic	LP	WEEK 3	1	EGGS	AVERAGE	0
47	4	JP2011 4-26	Symbiotic	NP	WEEK 3	1	EGGS	AVERAGE	12
48	2	JP2011 2-26	Symbiotic	NP	WEEK 3	1	EGGS	AVERAGE	6
49	2	JP2011 2-31	Aposymbiotic	Ctrl	WEEK 3	1	EGGS	AVERAGE	6
50	5	JP2011 5-31	Aposymbiotic	Ctrl	WEEK 3	1	EGGS	AVERAGE	20
51	3	JP2011 3-31	Aposymbiotic	LP	WEEK 3	1	EGGS	AVERAGE	6
52	6	JP2011 6-31	Aposymbiotic	LP	WEEK 3	1	EGGS	AVERAGE	13
53	4	JP2011 4-31	Aposymbiotic	NP	WEEK 3	1	EGGS	AVERAGE	1
54	2	JP2011 2-31	Aposymbiotic	NP	WEEK 3	1	EGGS	AVERAGE	14
55	1	JP2011 1-26	Symbiotic	Ctrl	WEEK 3	2	EGGS	AVERAGE	21
56	6	JP2011 6-26	Symbiotic	Ctrl	WEEK 3	2	EGGS	AVERAGE	22
57	1	JP2011 1-26	Symbiotic	LP	WEEK 3	2	EGGS	AVERAGE	11
58	5	JP2011 5-26	Symbiotic	LP	WEEK 3	2	EGGS	AVERAGE	10
59	6	JP2011 6-26	Symbiotic	NP	WEEK 3	2	EGGS	AVERAGE	17
60	3	JP2011 3-26	Symbiotic	NP	WEEK 3	2	EGGS	AVERAGE	15
61	3	JP2011 5-31	Aposymbiotic	Ctrl	WEEK 3	2	EGGS	AVERAGE	21
62	6	JP2011 6-31	Aposymbiotic	Ctrl	WEEK 3	2	EGGS	AVERAGE	18
63	2	JP2011 2-31	Aposymbiotic	LP	WEEK 3	2	EGGS	AVERAGE	14
64	5	JP2011 5-31	Aposymbiotic	LP	WEEK 3	2	EGGS	AVERAGE	14
65	6	JP2011 6-31	Aposymbiotic	NP	WEEK 3	2	EGGS	AVERAGE	10
66	3	JP2011 3-31	Aposymbiotic	NP	WEEK 3	2	EGGS	AVERAGE	16
67	5	JP2011 5-26	Symbiotic	Ctrl	WEEK 3	3	EGGS	AVERAGE	10
68	6	JP2011 6-26	Symbiotic	LP	WEEK 3	3	EGGS	AVERAGE	20
69	3	JP2011 3-26	Symbiotic	NP	WEEK 3	3	EGGS	AVERAGE	19
70	3	JP2011 5-31	Aposymbiotic	Ctrl	WEEK 3	3	EGGS	AVERAGE	4
71	6	JP2011 6-31	Aposymbiotic	LP	WEEK 3	3	EGGS	AVERAGE	13
72	2	JP2011 2-31	Aposymbiotic	NP	WEEK 3	3	EGGS	AVERAGE	13
73	2	JP2011 2-26	Symbiotic	Ctrl	WEEK 3	4	EGGS	AVERAGE	0
74	6	JP2011 6-26	Symbiotic	Ctrl	WEEK 3	4	EGGS	AVERAGE	6
75	2	JP2011 2-26	Symbiotic	LP	WEEK 3	4	EGGS	AVERAGE	0
76	6	JP2011 6-26	Symbiotic	LP	WEEK 3	4	EGGS	AVERAGE	0
77	1	JP2011 1-26	Symbiotic	NP	WEEK 3	4	EGGS	AVERAGE	6
78	6	JP2011 6-26	Symbiotic	NP	WEEK 3	4	EGGS	AVERAGE	0
79	1	JP2011 1-31 A	Aposymbiotic	Ctrl	WEEK 3	4	EGGS	AVERAGE	2
80	6	JP2011 6-31 B	Aposymbiotic	Ctrl	WEEK 3	4	EGGS	AVERAGE	0
81	1	JP2011 1-31 A	Aposymbiotic	LP	WEEK 3	4	EGGS	AVERAGE	4
82	1	JP2011 1-31 B	Aposymbiotic	LP	WEEK 3	4	EGGS	AVERAGE	9
83	1	JP2011 1-31 A	Aposymbiotic	NP	WEEK 3	4	EGGS	AVERAGE	3
84	1	JP2011 1-31 B	Aposymbiotic	NP	WEEK 3	4	EGGS	AVERAGE	5
85	2	JP2011 2-26	Symbiotic	Ctrl	WEEK 6	1	EGGS	AVERAGE	13.3333
86	5	JP2011 5-26	Symbiotic	Ctrl	WEEK 6	1	EGGS	AVERAGE	13.6667
87	3	JP2011 3-26	Symbiotic	LP	WEEK 6	1	EGGS	AVERAGE	3
88	4	JP2011 4-26	Symbiotic	NP	WEEK 6	1	EGGS	AVERAGE	8.33333
89	2	JP2011 2-26	Symbiotic	NP	WEEK 6	1	EGGS	AVERAGE	3.33333
90	2	JP2011 2-31	Aposymbiotic	Ctrl	WEEK 6	1	EGGS	AVERAGE	0
91	5	JP2011 5-31	Aposymbiotic	Ctrl	WEEK 6	1	EGGS	AVERAGE	2
92	3	JP2011 3-31	Aposymbiotic	LP	WEEK 6	1	EGGS	AVERAGE	1.33333
93	6	JP2011 6-31	Aposymbiotic	LP	WEEK 6	1	EGGS	AVERAGE	1.66667
94	4	JP2011 4-31	Aposymbiotic	NP	WEEK 6	1	EGGS	AVERAGE	0.666667
95	2	JP2011 2-31	Aposymbiotic	NP	WEEK 6	1	EGGS	AVERAGE	7.66667
96	1	JP2011 1-26	Symbiotic	Ctrl	WEEK 6	2	EGGS	AVERAGE	28
97	6	JP2011 6-26	Symbiotic	Ctrl	WEEK 6	2	EGGS	AVERAGE	25
98	1	JP2011 1-26	Symbiotic	LP	WEEK 6	2	EGGS	AVERAGE	18
99	5	JP2011 5-26	Symbiotic	LP	WEEK 6	2	EGGS	AVERAGE	6
100	6	JP2011 6-26	Symbiotic	NP	WEEK 6	2	EGGS	AVERAGE	11
101	3	JP2011 3-26	Symbiotic	NP	WEEK 6	2	EGGS	AVERAGE	8
102	3	JP2011 5-31	Aposymbiotic	Ctrl	WEEK 6	2	EGGS	AVERAGE	5.5
103	6	JP2011 6-31	Aposymbiotic	Ctrl	WEEK 6	2	EGGS	AVERAGE	1.5
104	2	JP2011 2-31	Aposymbiotic	LP	WEEK 6	2	EGGS	AVERAGE	8.5
105	5	JP2011 5-31	Aposymbiotic	LP	WEEK 6	2	EGGS	AVERAGE	12
106	6	JP2011 6-31	Aposymbiotic	NP	WEEK 6	2	EGGS	AVERAGE	5
107	3	JP2011 3-31	Aposymbiotic	NP	WEEK 6	2	EGGS	AVERAGE	0
108	3	JP2011 5-31	Symbiotic	Ctrl	WEEK 6	3	EGGS	AVERAGE	6.66667
109	2	JP2011 2-31	Symbiotic	LP	WEEK 6	3	EGGS	AVERAGE	16.6667
110	6	JP2011 6-31	Symbiotic	NP	WEEK 6	3	EGGS	AVERAGE	23
111	6	JP2011 6-31	Aposymbiotic	Ctrl	WEEK 6	3	EGGS	AVERAGE	14
112	5	JP2011 5-31	Aposymbiotic	LP	WEEK 6	3	EGGS	AVERAGE	10
113	3	JP2011 3-31	Aposymbiotic	NP	WEEK 6	3	EGGS	AVERAGE	7.66667
114	2	JP2011 2-26	Symbiotic	Ctrl	WEEK 6	4	EGGS	AVERAGE	2
115	6	JP2011 6-26	Symbiotic	Ctrl	WEEK 6	4	EGGS	AVERAGE	0
116	2	JP2011 2-26	Symbiotic	LP	WEEK 6	4	EGGS	AVERAGE	0
117	6	JP2011 6-26	Symbiotic	LP	WEEK 6	4	EGGS	AVERAGE	4
118	1	JP2011 1-26	Symbiotic	NP	WEEK 6	4	EGGS	AVERAGE	4
119	6	JP2011 6-26	Symbiotic	NP	WEEK 6	4	EGGS	AVERAGE	0
120	1	JP2011 1-31 A	Aposymbiotic	Ctrl	WEEK 6	4	EGGS	AVERAGE	13
121	1	JP2011 1-31 A	Aposymbiotic	LP	WEEK 6	4	EGGS	AVERAGE	2
122	1	JP2011 1-31 B	Aposymbiotic	LP	WEEK 6	4	EGGS	AVERAGE	0
123	1	JP2011 1-31 A	Aposymbiotic	NP	WEEK 6	4	EGGS	AVERAGE	0
124	2	JP2011 2-26	Symbiotic	Ctrl	WEEK 9	1	EGGS	AVERAGE	4
125	5	JP2011 5-26	Symbiotic	Ctrl	WEEK 9	1	EGGS	AVERAGE	13
126	3	JP2011 3-26	Symbiotic	LP	WEEK 9	1	EGGS	AVERAGE	2
127	4	JP2011 4-26	Symbiotic	NP	WEEK 9	1	EGGS	AVERAGE	2
128	2	JP2011 2-26	Symbiotic	NP	WEEK 9	1	EGGS	AVERAGE	3
129	5	JP2011 5-31	Aposymbiotic	Ctrl	WEEK 9	1	EGGS	AVERAGE	0
130	3	JP2011 3-31	Aposymbiotic	LP	WEEK 9	1	EGGS	AVERAGE	0
131	6	JP2011 6-31	Aposymbiotic	LP	WEEK 9	1	EGGS	AVERAGE	5
132	1	JP2011 1-26	Symbiotic	Ctrl	WEEK 9	2	EGGS	AVERAGE	29
133	6	JP2011 6-26	Symbiotic	Ctrl	WEEK 9	2	EGGS	AVERAGE	28
134	1	JP2011 1-26	Symbiotic	LP	WEEK 9	2	EGGS	AVERAGE	30
135	5	JP2011 5-26	Symbiotic	LP	WEEK 9	2	EGGS	AVERAGE	0
136	6	JP2011 6-26	Symbiotic	NP	WEEK 9	2	EGGS	AVERAGE	7
137	3	JP2011 3-26	Symbiotic	NP	WEEK 9	2	EGGS	AVERAGE	5
138	3	JP2011 5-31	Aposymbiotic	Ctrl	WEEK 9	2	EGGS	AVERAGE	7
139	2	JP2011 2-31	Aposymbiotic	LP	WEEK 9	2	EGGS	AVERAGE	7
140	5	JP2011 5-31	Aposymbiotic	LP	WEEK 9	2	EGGS	AVERAGE	11
141	6	JP2011 6-31	Aposymbiotic	NP	WEEK 9	2	EGGS	AVERAGE	2
142	3	JP2011 3-31	Aposymbiotic	NP	WEEK 9	2	EGGS	AVERAGE	0
143	3	JP2011 5-31	Symbiotic	Ctrl	WEEK 9	3	EGGS	AVERAGE	4.33333
144	2	JP2011 2-31	Symbiotic	LP	WEEK 9	3	EGGS	AVERAGE	4
145	6	JP2011 6-31	Symbiotic	NP	WEEK 9	3	EGGS	AVERAGE	9.33333
146	6	JP2011 6-31	Aposymbiotic	Ctrl	WEEK 9	3	EGGS	AVERAGE	13
147	5	JP2011 5-31	Aposymbiotic	LP	WEEK 9	3	EGGS	AVERAGE	5.33333
148	3	JP2011 3-31	Aposymbiotic	NP	WEEK 9	3	EGGS	AVERAGE	5.66667
149	2	JP2011 2-26	Symbiotic	Ctrl	WEEK 9	4	EGGS	AVERAGE	5
150	6	JP2011 6-26	Symbiotic	Ctrl	WEEK 9	4	EGGS	AVERAGE	0
151	2	JP2011 2-26	Symbiotic	LP	WEEK 9	4	EGGS	AVERAGE	1
152	6	JP2011 6-26	Symbiotic	LP	WEEK 9	4	EGGS	AVERAGE	7
153	1	JP2011 1-26	Symbiotic	NP	WEEK 9	4	EGGS	AVERAGE	4
154	6	JP2011 6-26	Symbiotic	NP	WEEK 9	4	EGGS	AVERAGE	2
155	1	JP2011 1-31 A	Aposymbiotic	Ctrl	WEEK 9	4	EGGS	AVERAGE	14
156	1	JP2011 1-31 A	Aposymbiotic	LP	WEEK 9	4	EGGS	AVERAGE	0
157	1	JP2011 1-31 A	Aposymbiotic	NP	WEEK 9	4	EGGS	AVERAGE	0
158	2	JP2011 2-26	Symbiotic	Ctrl	WEEK 12	1	EGGS	AVERAGE	3
159	5	JP2011 5-26	Symbiotic	Ctrl	WEEK 12	1	EGGS	AVERAGE	16
160	3	JP2011 3-26	Symbiotic	LP	WEEK 12	1	EGGS	AVERAGE	4
161	4	JP2011 4-26	Symbiotic	NP	WEEK 12	1	EGGS	AVERAGE	1
162	2	JP2011 2-26	Symbiotic	NP	WEEK 12	1	EGGS	AVERAGE	3
163	6	JP2011 6-31	Aposymbiotic	LP	WEEK 12	1	EGGS	AVERAGE	5
164	1	JP2011 1-26	Symbiotic	Ctrl	WEEK 12	2	EGGS	AVERAGE	21.3333
165	6	JP2011 6-26	Symbiotic	Ctrl	WEEK 12	2	EGGS	AVERAGE	24.6667
166	1	JP2011 1-26	Symbiotic	LP	WEEK 12	2	EGGS	AVERAGE	22
167	6	JP2011 6-26	Symbiotic	NP	WEEK 12	2	EGGS	AVERAGE	6
168	3	JP2011 5-31	Aposymbiotic	Ctrl	WEEK 12	2	EGGS	AVERAGE	6
169	2	JP2011 2-31	Aposymbiotic	LP	WEEK 12	2	EGGS	AVERAGE	6
170	5	JP2011 5-31	Aposymbiotic	LP	WEEK 12	2	EGGS	AVERAGE	13
171	6	JP2011 6-31	Aposymbiotic	NP	WEEK 12	2	EGGS	AVERAGE	2
172	3	JP2011 3-31	Aposymbiotic	NP	WEEK 12	2	EGGS	AVERAGE	0
173	3	JP2011 5-31	Symbiotic	Ctrl	WEEK 12	3	EGGS	AVERAGE	5.66667
174	2	JP2011 2-31	Symbiotic	LP	WEEK 12	3	EGGS	AVERAGE	1.66667
175	6	JP2011 6-31	Symbiotic	NP	WEEK 12	3	EGGS	AVERAGE	13
176	6	JP2011 6-31	Aposymbiotic	Ctrl	WEEK 12	3	EGGS	AVERAGE	11
177	5	JP2011 5-31	Aposymbiotic	LP	WEEK 12	3	EGGS	AVERAGE	4
178	3	JP2011 3-31	Aposymbiotic	NP	WEEK 12	3	EGGS	AVERAGE	2.66667
179	2	JP2011 2-26	Symbiotic	Ctrl	WEEK 12	4	EGGS	AVERAGE	4
180	2	JP2011 2-26	Symbiotic	LP	WEEK 12	4	EGGS	AVERAGE	4
181	6	JP2011 6-26	Symbiotic	LP	WEEK 12	4	EGGS	AVERAGE	10
182	1	JP2011 1-26	Symbiotic	NP	WEEK 12	4	EGGS	AVERAGE	0
183	6	JP2011 6-26	Symbiotic	NP	WEEK 12	4	EGGS	AVERAGE	4
184	1	JP2011 1-31 A	Aposymbiotic	Ctrl	WEEK 12	4	EGGS	AVERAGE	17
185	1	JP2011 1-31 A	Aposymbiotic	LP	WEEK 12	4	EGGS	AVERAGE	1
186	2	JP2011 2-26	Symbiotic	Ctrl	WEEK 0	1	LARVAE	AVERAGE	20
187	5	JP2011 5-26	Symbiotic	Ctrl	WEEK 0	1	LARVAE	AVERAGE	9
188	3	JP2011 3-26	Symbiotic	LP	WEEK 0	1	LARVAE	AVERAGE	25
189	6	JP2011 6-26	Symbiotic	LP	WEEK 0	1	LARVAE	AVERAGE	7
190	4	JP2011 4-26	Symbiotic	NP	WEEK 0	1	LARVAE	AVERAGE	22
191	2	JP2011 2-26	Symbiotic	NP	WEEK 0	1	LARVAE	AVERAGE	20
192	2	JP2011 2-31	Aposymbiotic	Ctrl	WEEK 0	1	LARVAE	AVERAGE	8
193	5	JP2011 5-31	Aposymbiotic	Ctrl	WEEK 0	1	LARVAE	AVERAGE	24
194	3	JP2011 3-31	Aposymbiotic	LP	WEEK 0	1	LARVAE	AVERAGE	32
195	6	JP2011 6-31	Aposymbiotic	LP	WEEK 0	1	LARVAE	AVERAGE	8
196	4	JP2011 4-31	Aposymbiotic	NP	WEEK 0	1	LARVAE	AVERAGE	29
197	2	JP2011 2-31	Aposymbiotic	NP	WEEK 0	1	LARVAE	AVERAGE	24
198	1	JP2011 1-26	Symbiotic	Ctrl	WEEK 0	2	LARVAE	AVERAGE	28
199	6	JP2011 6-26	Symbiotic	Ctrl	WEEK 0	2	LARVAE	AVERAGE	37
200	1	JP2011 1-26	Symbiotic	LP	WEEK 0	2	LARVAE	AVERAGE	21
201	5	JP2011 5-26	Symbiotic	LP	WEEK 0	2	LARVAE	AVERAGE	26
202	6	JP2011 6-26	Symbiotic	NP	WEEK 0	2	LARVAE	AVERAGE	40
203	3	JP2011 3-26	Symbiotic	NP	WEEK 0	2	LARVAE	AVERAGE	27
204	3	JP2011 5-31	Aposymbiotic	Ctrl	WEEK 0	2	LARVAE	AVERAGE	39
205	6	JP2011 6-31	Aposymbiotic	Ctrl	WEEK 0	2	LARVAE	AVERAGE	19
206	2	JP2011 2-31	Aposymbiotic	LP	WEEK 0	2	LARVAE	AVERAGE	34
207	5	JP2011 5-31	Aposymbiotic	LP	WEEK 0	2	LARVAE	AVERAGE	28
208	6	JP2011 6-31	Aposymbiotic	NP	WEEK 0	2	LARVAE	AVERAGE	18
209	3	JP2011 3-31	Aposymbiotic	NP	WEEK 0	2	LARVAE	AVERAGE	30
210	3	JP2011 5-31	Symbiotic	Ctrl	WEEK 0	3	LARVAE	AVERAGE	40.3333
211	2	JP2011 2-31	Symbiotic	LP	WEEK 0	3	LARVAE	AVERAGE	45
212	6	JP2011 6-31	Symbiotic	NP	WEEK 0	3	LARVAE	AVERAGE	36.6667
213	6	JP2011 6-31	Aposymbiotic	Ctrl	WEEK 0	3	LARVAE	AVERAGE	23.6667
214	5	JP2011 5-31	Aposymbiotic	LP	WEEK 0	3	LARVAE	AVERAGE	12.3333
215	3	JP2011 3-31	Aposymbiotic	NP	WEEK 0	3	LARVAE	AVERAGE	29
216	2	JP2011 2-26	Symbiotic	Ctrl	WEEK 0	4	LARVAE	AVERAGE	15
217	6	JP2011 6-26	Symbiotic	Ctrl	WEEK 0	4	LARVAE	AVERAGE	20
218	2	JP2011 2-26	Symbiotic	LP	WEEK 0	4	LARVAE	AVERAGE	69
219	6	JP2011 6-26	Symbiotic	LP	WEEK 0	4	LARVAE	AVERAGE	19
220	1	JP2011 1-26	Symbiotic	NP	WEEK 0	4	LARVAE	AVERAGE	27
221	6	JP2011 6-26	Symbiotic	NP	WEEK 0	4	LARVAE	AVERAGE	21
222	1	JP2011 1-31 A	Aposymbiotic	Ctrl	WEEK 0	4	LARVAE	AVERAGE	10
223	6	JP2011 6-31 B	Aposymbiotic	Ctrl	WEEK 0	4	LARVAE	AVERAGE	17
224	1	JP2011 1-31 A	Aposymbiotic	LP	WEEK 0	4	LARVAE	AVERAGE	9
225	1	JP2011 1-31 B	Aposymbiotic	LP	WEEK 0	4	LARVAE	AVERAGE	12
226	1	JP2011 1-31 A	Aposymbiotic	NP	WEEK 0	4	LARVAE	AVERAGE	17
227	1	JP2011 1-31 B	Aposymbiotic	NP	WEEK 0	4	LARVAE	AVERAGE	9
228	2	JP2011 2-26	Symbiotic	Ctrl	WEEK 3	1	LARVAE	AVERAGE	33
229	5	JP2011 5-26	Symbiotic	Ctrl	WEEK 3	1	LARVAE	AVERAGE	7
230	3	JP2011 3-26	Symbiotic	LP	WEEK 3	1	LARVAE	AVERAGE	23
231	6	JP2011 6-26	Symbiotic	LP	WEEK 3	1	LARVAE	AVERAGE	6
232	4	JP2011 4-26	Symbiotic	NP	WEEK 3	1	LARVAE	AVERAGE	23
233	2	JP2011 2-26	Symbiotic	NP	WEEK 3	1	LARVAE	AVERAGE	21
234	2	JP2011 2-31	Aposymbiotic	Ctrl	WEEK 3	1	LARVAE	AVERAGE	10
235	5	JP2011 5-31	Aposymbiotic	Ctrl	WEEK 3	1	LARVAE	AVERAGE	30
236	3	JP2011 3-31	Aposymbiotic	LP	WEEK 3	1	LARVAE	AVERAGE	41
237	6	JP2011 6-31	Aposymbiotic	LP	WEEK 3	1	LARVAE	AVERAGE	4
238	4	JP2011 4-31	Aposymbiotic	NP	WEEK 3	1	LARVAE	AVERAGE	33
239	2	JP2011 2-31	Aposymbiotic	NP	WEEK 3	1	LARVAE	AVERAGE	30
240	1	JP2011 1-26	Symbiotic	Ctrl	WEEK 3	2	LARVAE	AVERAGE	54
241	6	JP2011 6-26	Symbiotic	Ctrl	WEEK 3	2	LARVAE	AVERAGE	45
242	1	JP2011 1-26	Symbiotic	LP	WEEK 3	2	LARVAE	AVERAGE	41
243	5	JP2011 5-26	Symbiotic	LP	WEEK 3	2	LARVAE	AVERAGE	39
244	6	JP2011 6-26	Symbiotic	NP	WEEK 3	2	LARVAE	AVERAGE	46
245	3	JP2011 3-26	Symbiotic	NP	WEEK 3	2	LARVAE	AVERAGE	50
246	3	JP2011 5-31	Aposymbiotic	Ctrl	WEEK 3	2	LARVAE	AVERAGE	49
247	6	JP2011 6-31	Aposymbiotic	Ctrl	WEEK 3	2	LARVAE	AVERAGE	30
248	2	JP2011 2-31	Aposymbiotic	LP	WEEK 3	2	LARVAE	AVERAGE	41
249	5	JP2011 5-31	Aposymbiotic	LP	WEEK 3	2	LARVAE	AVERAGE	35
250	6	JP2011 6-31	Aposymbiotic	NP	WEEK 3	2	LARVAE	AVERAGE	22
251	3	JP2011 3-31	Aposymbiotic	NP	WEEK 3	2	LARVAE	AVERAGE	37
252	5	JP2011 5-26	Symbiotic	Ctrl	WEEK 3	3	LARVAE	AVERAGE	30
253	6	JP2011 6-26	Symbiotic	LP	WEEK 3	3	LARVAE	AVERAGE	44
254	3	JP2011 3-26	Symbiotic	NP	WEEK 3	3	LARVAE	AVERAGE	46
255	3	JP2011 5-31	Aposymbiotic	Ctrl	WEEK 3	3	LARVAE	AVERAGE	15
256	6	JP2011 6-31	Aposymbiotic	LP	WEEK 3	3	LARVAE	AVERAGE	21
257	2	JP2011 2-31	Aposymbiotic	NP	WEEK 3	3	LARVAE	AVERAGE	38
258	2	JP2011 2-26	Symbiotic	Ctrl	WEEK 3	4	LARVAE	AVERAGE	11
259	6	JP2011 6-26	Symbiotic	Ctrl	WEEK 3	4	LARVAE	AVERAGE	38
260	2	JP2011 2-26	Symbiotic	LP	WEEK 3	4	LARVAE	AVERAGE	14
261	6	JP2011 6-26	Symbiotic	LP	WEEK 3	4	LARVAE	AVERAGE	17
262	1	JP2011 1-26	Symbiotic	NP	WEEK 3	4	LARVAE	AVERAGE	27
263	6	JP2011 6-26	Symbiotic	NP	WEEK 3	4	LARVAE	AVERAGE	15
264	1	JP2011 1-31 A	Aposymbiotic	Ctrl	WEEK 3	4	LARVAE	AVERAGE	13
265	6	JP2011 6-31 B	Aposymbiotic	Ctrl	WEEK 3	4	LARVAE	AVERAGE	6
266	1	JP2011 1-31 A	Aposymbiotic	LP	WEEK 3	4	LARVAE	AVERAGE	8
267	1	JP2011 1-31 B	Aposymbiotic	LP	WEEK 3	4	LARVAE	AVERAGE	19
268	1	JP2011 1-31 A	Aposymbiotic	NP	WEEK 3	4	LARVAE	AVERAGE	15
269	1	JP2011 1-31 B	Aposymbiotic	NP	WEEK 3	4	LARVAE	AVERAGE	12
270	2	JP2011 2-26	Symbiotic	Ctrl	WEEK 6	1	LARVAE	AVERAGE	37
271	5	JP2011 5-26	Symbiotic	Ctrl	WEEK 6	1	LARVAE	AVERAGE	23
272	3	JP2011 3-26	Symbiotic	LP	WEEK 6	1	LARVAE	AVERAGE	19
273	4	JP2011 4-26	Symbiotic	NP	WEEK 6	1	LARVAE	AVERAGE	29
274	2	JP2011 2-26	Symbiotic	NP	WEEK 6	1	LARVAE	AVERAGE	11
275	2	JP2011 2-31	Aposymbiotic	Ctrl	WEEK 6	1	LARVAE	AVERAGE	1
276	5	JP2011 5-31	Aposymbiotic	Ctrl	WEEK 6	1	LARVAE	AVERAGE	34
277	3	JP2011 3-31	Aposymbiotic	LP	WEEK 6	1	LARVAE	AVERAGE	2
278	6	JP2011 6-31	Aposymbiotic	LP	WEEK 6	1	LARVAE	AVERAGE	6
279	4	JP2011 4-31	Aposymbiotic	NP	WEEK 6	1	LARVAE	AVERAGE	2
280	2	JP2011 2-31	Aposymbiotic	NP	WEEK 6	1	LARVAE	AVERAGE	14
281	1	JP2011 1-26	Symbiotic	Ctrl	WEEK 6	2	LARVAE	AVERAGE	43.5
282	6	JP2011 6-26	Symbiotic	Ctrl	WEEK 6	2	LARVAE	AVERAGE	72
283	1	JP2011 1-26	Symbiotic	LP	WEEK 6	2	LARVAE	AVERAGE	40.5
284	5	JP2011 5-26	Symbiotic	LP	WEEK 6	2	LARVAE	AVERAGE	20.5
285	6	JP2011 6-26	Symbiotic	NP	WEEK 6	2	LARVAE	AVERAGE	26
286	3	JP2011 3-26	Symbiotic	NP	WEEK 6	2	LARVAE	AVERAGE	30.5
287	3	JP2011 5-31	Aposymbiotic	Ctrl	WEEK 6	2	LARVAE	AVERAGE	37
288	6	JP2011 6-31	Aposymbiotic	Ctrl	WEEK 6	2	LARVAE	AVERAGE	24.5
289	2	JP2011 2-31	Aposymbiotic	LP	WEEK 6	2	LARVAE	AVERAGE	30.5
290	5	JP2011 5-31	Aposymbiotic	LP	WEEK 6	2	LARVAE	AVERAGE	26
291	6	JP2011 6-31	Aposymbiotic	NP	WEEK 6	2	LARVAE	AVERAGE	21.5
292	3	JP2011 3-31	Aposymbiotic	NP	WEEK 6	2	LARVAE	AVERAGE	14.5
293	3	JP2011 5-31	Symbiotic	Ctrl	WEEK 6	3	LARVAE	AVERAGE	23.3333
294	2	JP2011 2-31	Symbiotic	LP	WEEK 6	3	LARVAE	AVERAGE	25.6667
295	6	JP2011 6-31	Symbiotic	NP	WEEK 6	3	LARVAE	AVERAGE	38
296	6	JP2011 6-31	Aposymbiotic	Ctrl	WEEK 6	3	LARVAE	AVERAGE	25
297	5	JP2011 5-31	Aposymbiotic	LP	WEEK 6	3	LARVAE	AVERAGE	11.6667
298	3	JP2011 3-31	Aposymbiotic	NP	WEEK 6	3	LARVAE	AVERAGE	21
299	2	JP2011 2-26	Symbiotic	Ctrl	WEEK 6	4	LARVAE	AVERAGE	11
300	6	JP2011 6-26	Symbiotic	Ctrl	WEEK 6	4	LARVAE	AVERAGE	13
301	2	JP2011 2-26	Symbiotic	LP	WEEK 6	4	LARVAE	AVERAGE	5
302	6	JP2011 6-26	Symbiotic	LP	WEEK 6	4	LARVAE	AVERAGE	24
303	1	JP2011 1-26	Symbiotic	NP	WEEK 6	4	LARVAE	AVERAGE	14
304	6	JP2011 6-26	Symbiotic	NP	WEEK 6	4	LARVAE	AVERAGE	5
305	1	JP2011 1-31 A	Aposymbiotic	Ctrl	WEEK 6	4	LARVAE	AVERAGE	24
306	1	JP2011 1-31 A	Aposymbiotic	LP	WEEK 6	4	LARVAE	AVERAGE	6
307	1	JP2011 1-31 B	Aposymbiotic	LP	WEEK 6	4	LARVAE	AVERAGE	5
308	1	JP2011 1-31 A	Aposymbiotic	NP	WEEK 6	4	LARVAE	AVERAGE	7
309	2	JP2011 2-26	Symbiotic	Ctrl	WEEK 9	1	LARVAE	AVERAGE	28
310	5	JP2011 5-26	Symbiotic	Ctrl	WEEK 9	1	LARVAE	AVERAGE	26
311	3	JP2011 3-26	Symbiotic	LP	WEEK 9	1	LARVAE	AVERAGE	11
312	4	JP2011 4-26	Symbiotic	NP	WEEK 9	1	LARVAE	AVERAGE	21
313	2	JP2011 2-26	Symbiotic	NP	WEEK 9	1	LARVAE	AVERAGE	9
314	5	JP2011 5-31	Aposymbiotic	Ctrl	WEEK 9	1	LARVAE	AVERAGE	8
315	3	JP2011 3-31	Aposymbiotic	LP	WEEK 9	1	LARVAE	AVERAGE	1
316	6	JP2011 6-31	Aposymbiotic	LP	WEEK 9	1	LARVAE	AVERAGE	16
317	1	JP2011 1-26	Symbiotic	Ctrl	WEEK 9	2	LARVAE	AVERAGE	60
318	6	JP2011 6-26	Symbiotic	Ctrl	WEEK 9	2	LARVAE	AVERAGE	59
319	1	JP2011 1-26	Symbiotic	LP	WEEK 9	2	LARVAE	AVERAGE	48
320	5	JP2011 5-26	Symbiotic	LP	WEEK 9	2	LARVAE	AVERAGE	16
321	6	JP2011 6-26	Symbiotic	NP	WEEK 9	2	LARVAE	AVERAGE	20
322	3	JP2011 3-26	Symbiotic	NP	WEEK 9	2	LARVAE	AVERAGE	19
323	3	JP2011 5-31	Aposymbiotic	Ctrl	WEEK 9	2	LARVAE	AVERAGE	15.5
324	2	JP2011 2-31	Aposymbiotic	LP	WEEK 9	2	LARVAE	AVERAGE	21.5
325	5	JP2011 5-31	Aposymbiotic	LP	WEEK 9	2	LARVAE	AVERAGE	22
326	6	JP2011 6-31	Aposymbiotic	NP	WEEK 9	2	LARVAE	AVERAGE	7.5
327	3	JP2011 3-31	Aposymbiotic	NP	WEEK 9	2	LARVAE	AVERAGE	5
328	3	JP2011 5-31	Symbiotic	Ctrl	WEEK 9	3	LARVAE	AVERAGE	0.666667
329	2	JP2011 2-31	Symbiotic	LP	WEEK 9	3	LARVAE	AVERAGE	8.33333
330	6	JP2011 6-31	Symbiotic	NP	WEEK 9	3	LARVAE	AVERAGE	19.6667
331	6	JP2011 6-31	Aposymbiotic	Ctrl	WEEK 9	3	LARVAE	AVERAGE	19
332	5	JP2011 5-31	Aposymbiotic	LP	WEEK 9	3	LARVAE	AVERAGE	3.33333
333	3	JP2011 3-31	Aposymbiotic	NP	WEEK 9	3	LARVAE	AVERAGE	7.66667
334	2	JP2011 2-26	Symbiotic	Ctrl	WEEK 9	4	LARVAE	AVERAGE	7
335	6	JP2011 6-26	Symbiotic	Ctrl	WEEK 9	4	LARVAE	AVERAGE	0
336	2	JP2011 2-26	Symbiotic	LP	WEEK 9	4	LARVAE	AVERAGE	2
337	6	JP2011 6-26	Symbiotic	LP	WEEK 9	4	LARVAE	AVERAGE	34
338	1	JP2011 1-26	Symbiotic	NP	WEEK 9	4	LARVAE	AVERAGE	11
339	6	JP2011 6-26	Symbiotic	NP	WEEK 9	4	LARVAE	AVERAGE	0
340	1	JP2011 1-31 A	Aposymbiotic	Ctrl	WEEK 9	4	LARVAE	AVERAGE	30
341	1	JP2011 1-31 A	Aposymbiotic	LP	WEEK 9	4	LARVAE	AVERAGE	4
342	1	JP2011 1-31 A	Aposymbiotic	NP	WEEK 9	4	LARVAE	AVERAGE	2
343	2	JP2011 2-26	Symbiotic	Ctrl	WEEK 12	1	LARVAE	AVERAGE	3
344	5	JP2011 5-26	Symbiotic	Ctrl	WEEK 12	1	LARVAE	AVERAGE	32
345	3	JP2011 3-26	Symbiotic	LP	WEEK 12	1	LARVAE	AVERAGE	9
346	4	JP2011 4-26	Symbiotic	NP	WEEK 12	1	LARVAE	AVERAGE	5
347	2	JP2011 2-26	Symbiotic	NP	WEEK 12	1	LARVAE	AVERAGE	5
348	6	JP2011 6-31	Aposymbiotic	LP	WEEK 12	1	LARVAE	AVERAGE	20
349	1	JP2011 1-26	Symbiotic	Ctrl	WEEK 12	2	LARVAE	AVERAGE	43
350	6	JP2011 6-26	Symbiotic	Ctrl	WEEK 12	2	LARVAE	AVERAGE	44.6667
351	1	JP2011 1-26	Symbiotic	LP	WEEK 12	2	LARVAE	AVERAGE	41.6667
352	6	JP2011 6-26	Symbiotic	NP	WEEK 12	2	LARVAE	AVERAGE	17.6667
353	3	JP2011 5-31	Aposymbiotic	Ctrl	WEEK 12	2	LARVAE	AVERAGE	14
354	2	JP2011 2-31	Aposymbiotic	LP	WEEK 12	2	LARVAE	AVERAGE	17
355	5	JP2011 5-31	Aposymbiotic	LP	WEEK 12	2	LARVAE	AVERAGE	17
356	6	JP2011 6-31	Aposymbiotic	NP	WEEK 12	2	LARVAE	AVERAGE	2
357	3	JP2011 3-31	Aposymbiotic	NP	WEEK 12	2	LARVAE	AVERAGE	1
358	3	JP2011 5-31	Symbiotic	Ctrl	WEEK 12	3	LARVAE	AVERAGE	0
359	2	JP2011 2-31	Symbiotic	LP	WEEK 12	3	LARVAE	AVERAGE	9.66667
360	6	JP2011 6-31	Symbiotic	NP	WEEK 12	3	LARVAE	AVERAGE	9.66667
361	6	JP2011 6-31	Aposymbiotic	Ctrl	WEEK 12	3	LARVAE	AVERAGE	15.3333
362	5	JP2011 5-31	Aposymbiotic	LP	WEEK 12	3	LARVAE	AVERAGE	7
363	3	JP2011 3-31	Aposymbiotic	NP	WEEK 12	3	LARVAE	AVERAGE	4.33333
364	2	JP2011 2-26	Symbiotic	Ctrl	WEEK 12	4	LARVAE	AVERAGE	15
365	2	JP2011 2-26	Symbiotic	LP	WEEK 12	4	LARVAE	AVERAGE	0
366	6	JP2011 6-26	Symbiotic	LP	WEEK 12	4	LARVAE	AVERAGE	15
367	1	JP2011 1-26	Symbiotic	NP	WEEK 12	4	LARVAE	AVERAGE	7
368	6	JP2011 6-26	Symbiotic	NP	WEEK 12	4	LARVAE	AVERAGE	0
369	1	JP2011 1-31 A	Aposymbiotic	Ctrl	WEEK 12	4	LARVAE	AVERAGE	22
370	1	JP2011 1-31 A	Aposymbiotic	LP	WEEK 12	4	LARVAE	AVERAGE	4
371	2	JP2011 2-26	Symbiotic	Ctrl	WEEK 0	1	PUPAE	AVERAGE	5
372	5	JP2011 5-26	Symbiotic	Ctrl	WEEK 0	1	PUPAE	AVERAGE	11
373	3	JP2011 3-26	Symbiotic	LP	WEEK 0	1	PUPAE	AVERAGE	10
374	6	JP2011 6-26	Symbiotic	LP	WEEK 0	1	PUPAE	AVERAGE	3
375	4	JP2011 4-26	Symbiotic	NP	WEEK 0	1	PUPAE	AVERAGE	5
376	2	JP2011 2-26	Symbiotic	NP	WEEK 0	1	PUPAE	AVERAGE	3
377	2	JP2011 2-31	Aposymbiotic	Ctrl	WEEK 0	1	PUPAE	AVERAGE	1
378	5	JP2011 5-31	Aposymbiotic	Ctrl	WEEK 0	1	PUPAE	AVERAGE	9
379	3	JP2011 3-31	Aposymbiotic	LP	WEEK 0	1	PUPAE	AVERAGE	2
380	6	JP2011 6-31	Aposymbiotic	LP	WEEK 0	1	PUPAE	AVERAGE	2
381	4	JP2011 4-31	Aposymbiotic	NP	WEEK 0	1	PUPAE	AVERAGE	8
382	2	JP2011 2-31	Aposymbiotic	NP	WEEK 0	1	PUPAE	AVERAGE	5
383	1	JP2011 1-26	Symbiotic	Ctrl	WEEK 0	2	PUPAE	AVERAGE	10
384	6	JP2011 6-26	Symbiotic	Ctrl	WEEK 0	2	PUPAE	AVERAGE	8.5
385	1	JP2011 1-26	Symbiotic	LP	WEEK 0	2	PUPAE	AVERAGE	8.5
386	5	JP2011 5-26	Symbiotic	LP	WEEK 0	2	PUPAE	AVERAGE	5.5
387	6	JP2011 6-26	Symbiotic	NP	WEEK 0	2	PUPAE	AVERAGE	6
388	3	JP2011 3-26	Symbiotic	NP	WEEK 0	2	PUPAE	AVERAGE	2.5
389	3	JP2011 5-31	Aposymbiotic	Ctrl	WEEK 0	2	PUPAE	AVERAGE	7.5
390	6	JP2011 6-31	Aposymbiotic	Ctrl	WEEK 0	2	PUPAE	AVERAGE	7.5
391	2	JP2011 2-31	Aposymbiotic	LP	WEEK 0	2	PUPAE	AVERAGE	7.5
392	5	JP2011 5-31	Aposymbiotic	LP	WEEK 0	2	PUPAE	AVERAGE	9
393	6	JP2011 6-31	Aposymbiotic	NP	WEEK 0	2	PUPAE	AVERAGE	9
394	3	JP2011 3-31	Aposymbiotic	NP	WEEK 0	2	PUPAE	AVERAGE	9
395	3	JP2011 5-31	Symbiotic	Ctrl	WEEK 0	3	PUPAE	AVERAGE	11.3333
396	2	JP2011 2-31	Symbiotic	LP	WEEK 0	3	PUPAE	AVERAGE	9.66667
397	6	JP2011 6-31	Symbiotic	NP	WEEK 0	3	PUPAE	AVERAGE	12
398	6	JP2011 6-31	Aposymbiotic	Ctrl	WEEK 0	3	PUPAE	AVERAGE	6
399	5	JP2011 5-31	Aposymbiotic	LP	WEEK 0	3	PUPAE	AVERAGE	5
400	3	JP2011 3-31	Aposymbiotic	NP	WEEK 0	3	PUPAE	AVERAGE	10.6667
401	2	JP2011 2-26	Symbiotic	Ctrl	WEEK 0	4	PUPAE	AVERAGE	9
402	6	JP2011 6-26	Symbiotic	Ctrl	WEEK 0	4	PUPAE	AVERAGE	7
403	2	JP2011 2-26	Symbiotic	LP	WEEK 0	4	PUPAE	AVERAGE	10
404	6	JP2011 6-26	Symbiotic	LP	WEEK 0	4	PUPAE	AVERAGE	17
405	1	JP2011 1-26	Symbiotic	NP	WEEK 0	4	PUPAE	AVERAGE	10
406	6	JP2011 6-26	Symbiotic	NP	WEEK 0	4	PUPAE	AVERAGE	5
407	1	JP2011 1-31 A	Aposymbiotic	Ctrl	WEEK 0	4	PUPAE	AVERAGE	1
408	6	JP2011 6-31 B	Aposymbiotic	Ctrl	WEEK 0	4	PUPAE	AVERAGE	10
409	1	JP2011 1-31 A	Aposymbiotic	LP	WEEK 0	4	PUPAE	AVERAGE	2
410	1	JP2011 1-31 B	Aposymbiotic	LP	WEEK 0	4	PUPAE	AVERAGE	9
411	1	JP2011 1-31 A	Aposymbiotic	NP	WEEK 0	4	PUPAE	AVERAGE	6
412	1	JP2011 1-31 B	Aposymbiotic	NP	WEEK 0	4	PUPAE	AVERAGE	6
413	2	JP2011 2-26	Symbiotic	Ctrl	WEEK 3	1	PUPAE	AVERAGE	10
414	5	JP2011 5-26	Symbiotic	Ctrl	WEEK 3	1	PUPAE	AVERAGE	4
415	3	JP2011 3-26	Symbiotic	LP	WEEK 3	1	PUPAE	AVERAGE	7
416	6	JP2011 6-26	Symbiotic	LP	WEEK 3	1	PUPAE	AVERAGE	3
417	4	JP2011 4-26	Symbiotic	NP	WEEK 3	1	PUPAE	AVERAGE	4
418	2	JP2011 2-26	Symbiotic	NP	WEEK 3	1	PUPAE	AVERAGE	3
419	2	JP2011 2-31	Aposymbiotic	Ctrl	WEEK 3	1	PUPAE	AVERAGE	0
420	5	JP2011 5-31	Aposymbiotic	Ctrl	WEEK 3	1	PUPAE	AVERAGE	9
421	3	JP2011 3-31	Aposymbiotic	LP	WEEK 3	1	PUPAE	AVERAGE	3
422	6	JP2011 6-31	Aposymbiotic	LP	WEEK 3	1	PUPAE	AVERAGE	3
423	4	JP2011 4-31	Aposymbiotic	NP	WEEK 3	1	PUPAE	AVERAGE	2
424	2	JP2011 2-31	Aposymbiotic	NP	WEEK 3	1	PUPAE	AVERAGE	7
425	1	JP2011 1-26	Symbiotic	Ctrl	WEEK 3	2	PUPAE	AVERAGE	13
426	6	JP2011 6-26	Symbiotic	Ctrl	WEEK 3	2	PUPAE	AVERAGE	16
427	1	JP2011 1-26	Symbiotic	LP	WEEK 3	2	PUPAE	AVERAGE	3
428	5	JP2011 5-26	Symbiotic	LP	WEEK 3	2	PUPAE	AVERAGE	1
429	6	JP2011 6-26	Symbiotic	NP	WEEK 3	2	PUPAE	AVERAGE	6
430	3	JP2011 3-26	Symbiotic	NP	WEEK 3	2	PUPAE	AVERAGE	2
431	3	JP2011 5-31	Aposymbiotic	Ctrl	WEEK 3	2	PUPAE	AVERAGE	15
432	6	JP2011 6-31	Aposymbiotic	Ctrl	WEEK 3	2	PUPAE	AVERAGE	5
433	2	JP2011 2-31	Aposymbiotic	LP	WEEK 3	2	PUPAE	AVERAGE	4
434	5	JP2011 5-31	Aposymbiotic	LP	WEEK 3	2	PUPAE	AVERAGE	8
435	6	JP2011 6-31	Aposymbiotic	NP	WEEK 3	2	PUPAE	AVERAGE	4
436	3	JP2011 3-31	Aposymbiotic	NP	WEEK 3	2	PUPAE	AVERAGE	1
437	5	JP2011 5-26	Symbiotic	Ctrl	WEEK 3	3	PUPAE	AVERAGE	13
438	6	JP2011 6-26	Symbiotic	LP	WEEK 3	3	PUPAE	AVERAGE	21
439	3	JP2011 3-26	Symbiotic	NP	WEEK 3	3	PUPAE	AVERAGE	12
440	3	JP2011 5-31	Aposymbiotic	Ctrl	WEEK 3	3	PUPAE	AVERAGE	7
441	6	JP2011 6-31	Aposymbiotic	LP	WEEK 3	3	PUPAE	AVERAGE	6
442	2	JP2011 2-31	Aposymbiotic	NP	WEEK 3	3	PUPAE	AVERAGE	3
443	2	JP2011 2-26	Symbiotic	Ctrl	WEEK 3	4	PUPAE	AVERAGE	1
444	6	JP2011 6-26	Symbiotic	Ctrl	WEEK 3	4	PUPAE	AVERAGE	4
445	2	JP2011 2-26	Symbiotic	LP	WEEK 3	4	PUPAE	AVERAGE	8
446	6	JP2011 6-26	Symbiotic	LP	WEEK 3	4	PUPAE	AVERAGE	3
447	1	JP2011 1-26	Symbiotic	NP	WEEK 3	4	PUPAE	AVERAGE	1
448	6	JP2011 6-26	Symbiotic	NP	WEEK 3	4	PUPAE	AVERAGE	2
449	1	JP2011 1-31 A	Aposymbiotic	Ctrl	WEEK 3	4	PUPAE	AVERAGE	1
450	6	JP2011 6-31 B	Aposymbiotic	Ctrl	WEEK 3	4	PUPAE	AVERAGE	3
451	1	JP2011 1-31 A	Aposymbiotic	LP	WEEK 3	4	PUPAE	AVERAGE	1
452	1	JP2011 1-31 B	Aposymbiotic	LP	WEEK 3	4	PUPAE	AVERAGE	3
453	1	JP2011 1-31 A	Aposymbiotic	NP	WEEK 3	4	PUPAE	AVERAGE	0
454	1	JP2011 1-31 B	Aposymbiotic	NP	WEEK 3	4	PUPAE	AVERAGE	3
455	2	JP2011 2-26	Symbiotic	Ctrl	WEEK 6	1	PUPAE	AVERAGE	4
456	5	JP2011 5-26	Symbiotic	Ctrl	WEEK 6	1	PUPAE	AVERAGE	5
457	3	JP2011 3-26	Symbiotic	LP	WEEK 6	1	PUPAE	AVERAGE	0
458	4	JP2011 4-26	Symbiotic	NP	WEEK 6	1	PUPAE	AVERAGE	4
459	2	JP2011 2-26	Symbiotic	NP	WEEK 6	1	PUPAE	AVERAGE	0
460	2	JP2011 2-31	Aposymbiotic	Ctrl	WEEK 6	1	PUPAE	AVERAGE	3
461	5	JP2011 5-31	Aposymbiotic	Ctrl	WEEK 6	1	PUPAE	AVERAGE	8
462	3	JP2011 3-31	Aposymbiotic	LP	WEEK 6	1	PUPAE	AVERAGE	0
463	6	JP2011 6-31	Aposymbiotic	LP	WEEK 6	1	PUPAE	AVERAGE	9
464	4	JP2011 4-31	Aposymbiotic	NP	WEEK 6	1	PUPAE	AVERAGE	0
465	2	JP2011 2-31	Aposymbiotic	NP	WEEK 6	1	PUPAE	AVERAGE	0
466	1	JP2011 1-26	Symbiotic	Ctrl	WEEK 6	2	PUPAE	AVERAGE	38
467	6	JP2011 6-26	Symbiotic	Ctrl	WEEK 6	2	PUPAE	AVERAGE	5
468	1	JP2011 1-26	Symbiotic	LP	WEEK 6	2	PUPAE	AVERAGE	15
469	5	JP2011 5-26	Symbiotic	LP	WEEK 6	2	PUPAE	AVERAGE	4.5
470	6	JP2011 6-26	Symbiotic	NP	WEEK 6	2	PUPAE	AVERAGE	2
471	3	JP2011 3-26	Symbiotic	NP	WEEK 6	2	PUPAE	AVERAGE	0
472	3	JP2011 5-31	Aposymbiotic	Ctrl	WEEK 6	2	PUPAE	AVERAGE	5
473	6	JP2011 6-31	Aposymbiotic	Ctrl	WEEK 6	2	PUPAE	AVERAGE	0
474	2	JP2011 2-31	Aposymbiotic	LP	WEEK 6	2	PUPAE	AVERAGE	1
475	5	JP2011 5-31	Aposymbiotic	LP	WEEK 6	2	PUPAE	AVERAGE	5.5
476	6	JP2011 6-31	Aposymbiotic	NP	WEEK 6	2	PUPAE	AVERAGE	1
477	3	JP2011 3-31	Aposymbiotic	NP	WEEK 6	2	PUPAE	AVERAGE	0
478	3	JP2011 5-31	Symbiotic	Ctrl	WEEK 6	3	PUPAE	AVERAGE	6.66667
479	2	JP2011 2-31	Symbiotic	LP	WEEK 6	3	PUPAE	AVERAGE	12
480	6	JP2011 6-31	Symbiotic	NP	WEEK 6	3	PUPAE	AVERAGE	8.66667
481	6	JP2011 6-31	Aposymbiotic	Ctrl	WEEK 6	3	PUPAE	AVERAGE	6
482	5	JP2011 5-31	Aposymbiotic	LP	WEEK 6	3	PUPAE	AVERAGE	9.66667
483	3	JP2011 3-31	Aposymbiotic	NP	WEEK 6	3	PUPAE	AVERAGE	1
484	2	JP2011 2-26	Symbiotic	Ctrl	WEEK 6	4	PUPAE	AVERAGE	0
485	6	JP2011 6-26	Symbiotic	Ctrl	WEEK 6	4	PUPAE	AVERAGE	9
486	2	JP2011 2-26	Symbiotic	LP	WEEK 6	4	PUPAE	AVERAGE	0
487	6	JP2011 6-26	Symbiotic	LP	WEEK 6	4	PUPAE	AVERAGE	7
488	1	JP2011 1-26	Symbiotic	NP	WEEK 6	4	PUPAE	AVERAGE	1
489	6	JP2011 6-26	Symbiotic	NP	WEEK 6	4	PUPAE	AVERAGE	0
490	1	JP2011 1-31 A	Aposymbiotic	Ctrl	WEEK 6	4	PUPAE	AVERAGE	1
491	1	JP2011 1-31 A	Aposymbiotic	LP	WEEK 6	4	PUPAE	AVERAGE	0
492	1	JP2011 1-31 B	Aposymbiotic	LP	WEEK 6	4	PUPAE	AVERAGE	1
493	1	JP2011 1-31 A	Aposymbiotic	NP	WEEK 6	4	PUPAE	AVERAGE	0
494	2	JP2011 2-26	Symbiotic	Ctrl	WEEK 9	1	PUPAE	AVERAGE	6
495	5	JP2011 5-26	Symbiotic	Ctrl	WEEK 9	1	PUPAE	AVERAGE	7
496	3	JP2011 3-26	Symbiotic	LP	WEEK 9	1	PUPAE	AVERAGE	0
497	4	JP2011 4-26	Symbiotic	NP	WEEK 9	1	PUPAE	AVERAGE	3
498	2	JP2011 2-26	Symbiotic	NP	WEEK 9	1	PUPAE	AVERAGE	0
499	5	JP2011 5-31	Aposymbiotic	Ctrl	WEEK 9	1	PUPAE	AVERAGE	17
500	3	JP2011 3-31	Aposymbiotic	LP	WEEK 9	1	PUPAE	AVERAGE	0
501	6	JP2011 6-31	Aposymbiotic	LP	WEEK 9	1	PUPAE	AVERAGE	3
502	1	JP2011 1-26	Symbiotic	Ctrl	WEEK 9	2	PUPAE	AVERAGE	23
503	6	JP2011 6-26	Symbiotic	Ctrl	WEEK 9	2	PUPAE	AVERAGE	13
504	1	JP2011 1-26	Symbiotic	LP	WEEK 9	2	PUPAE	AVERAGE	27
505	5	JP2011 5-26	Symbiotic	LP	WEEK 9	2	PUPAE	AVERAGE	6
506	6	JP2011 6-26	Symbiotic	NP	WEEK 9	2	PUPAE	AVERAGE	1
507	3	JP2011 3-26	Symbiotic	NP	WEEK 9	2	PUPAE	AVERAGE	3
508	3	JP2011 5-31	Aposymbiotic	Ctrl	WEEK 9	2	PUPAE	AVERAGE	5
509	2	JP2011 2-31	Aposymbiotic	LP	WEEK 9	2	PUPAE	AVERAGE	0
510	5	JP2011 5-31	Aposymbiotic	LP	WEEK 9	2	PUPAE	AVERAGE	6
511	6	JP2011 6-31	Aposymbiotic	NP	WEEK 9	2	PUPAE	AVERAGE	3
512	3	JP2011 3-31	Aposymbiotic	NP	WEEK 9	2	PUPAE	AVERAGE	0
513	3	JP2011 5-31	Symbiotic	Ctrl	WEEK 9	3	PUPAE	AVERAGE	6.66667
514	2	JP2011 2-31	Symbiotic	LP	WEEK 9	3	PUPAE	AVERAGE	8.66667
515	6	JP2011 6-31	Symbiotic	NP	WEEK 9	3	PUPAE	AVERAGE	2
516	6	JP2011 6-31	Aposymbiotic	Ctrl	WEEK 9	3	PUPAE	AVERAGE	9.66667
517	5	JP2011 5-31	Aposymbiotic	LP	WEEK 9	3	PUPAE	AVERAGE	0
518	3	JP2011 3-31	Aposymbiotic	NP	WEEK 9	3	PUPAE	AVERAGE	0
519	2	JP2011 2-26	Symbiotic	Ctrl	WEEK 9	4	PUPAE	AVERAGE	1
520	6	JP2011 6-26	Symbiotic	Ctrl	WEEK 9	4	PUPAE	AVERAGE	2
521	2	JP2011 2-26	Symbiotic	LP	WEEK 9	4	PUPAE	AVERAGE	0
522	6	JP2011 6-26	Symbiotic	LP	WEEK 9	4	PUPAE	AVERAGE	4
523	1	JP2011 1-26	Symbiotic	NP	WEEK 9	4	PUPAE	AVERAGE	0
524	6	JP2011 6-26	Symbiotic	NP	WEEK 9	4	PUPAE	AVERAGE	0
525	1	JP2011 1-31 A	Aposymbiotic	Ctrl	WEEK 9	4	PUPAE	AVERAGE	4
526	1	JP2011 1-31 A	Aposymbiotic	LP	WEEK 9	4	PUPAE	AVERAGE	0
527	1	JP2011 1-31 A	Aposymbiotic	NP	WEEK 9	4	PUPAE	AVERAGE	0
528	2	JP2011 2-26	Symbiotic	Ctrl	WEEK 12	1	PUPAE	AVERAGE	1
529	5	JP2011 5-26	Symbiotic	Ctrl	WEEK 12	1	PUPAE	AVERAGE	14
530	3	JP2011 3-26	Symbiotic	LP	WEEK 12	1	PUPAE	AVERAGE	0
531	4	JP2011 4-26	Symbiotic	NP	WEEK 12	1	PUPAE	AVERAGE	0
532	2	JP2011 2-26	Symbiotic	NP	WEEK 12	1	PUPAE	AVERAGE	0
533	6	JP2011 6-31	Aposymbiotic	LP	WEEK 12	1	PUPAE	AVERAGE	1
534	1	JP2011 1-26	Symbiotic	Ctrl	WEEK 12	2	PUPAE	AVERAGE	13.3333
535	6	JP2011 6-26	Symbiotic	Ctrl	WEEK 12	2	PUPAE	AVERAGE	12.3333
536	1	JP2011 1-26	Symbiotic	LP	WEEK 12	2	PUPAE	AVERAGE	24.6667
537	6	JP2011 6-26	Symbiotic	NP	WEEK 12	2	PUPAE	AVERAGE	3
538	3	JP2011 5-31	Aposymbiotic	Ctrl	WEEK 12	2	PUPAE	AVERAGE	5
539	2	JP2011 2-31	Aposymbiotic	LP	WEEK 12	2	PUPAE	AVERAGE	6
540	5	JP2011 5-31	Aposymbiotic	LP	WEEK 12	2	PUPAE	AVERAGE	7
541	6	JP2011 6-31	Aposymbiotic	NP	WEEK 12	2	PUPAE	AVERAGE	0
542	3	JP2011 3-31	Aposymbiotic	NP	WEEK 12	2	PUPAE	AVERAGE	0
543	3	JP2011 5-31	Symbiotic	Ctrl	WEEK 12	3	PUPAE	AVERAGE	2.66667
544	2	JP2011 2-31	Symbiotic	LP	WEEK 12	3	PUPAE	AVERAGE	1.33333
545	6	JP2011 6-31	Symbiotic	NP	WEEK 12	3	PUPAE	AVERAGE	0
546	6	JP2011 6-31	Aposymbiotic	Ctrl	WEEK 12	3	PUPAE	AVERAGE	2
547	5	JP2011 5-31	Aposymbiotic	LP	WEEK 12	3	PUPAE	AVERAGE	0.666667
548	3	JP2011 3-31	Aposymbiotic	NP	WEEK 12	3	PUPAE	AVERAGE	0.666667
549	2	JP2011 2-26	Symbiotic	Ctrl	WEEK 12	4	PUPAE	AVERAGE	3
550	2	JP2011 2-26	Symbiotic	LP	WEEK 12	4	PUPAE	AVERAGE	0
551	6	JP2011 6-26	Symbiotic	LP	WEEK 12	4	PUPAE	AVERAGE	4
552	1	JP2011 1-26	Symbiotic	NP	WEEK 12	4	PUPAE	AVERAGE	0
553	6	JP2011 6-26	Symbiotic	NP	WEEK 12	4	PUPAE	AVERAGE	0
554	1	JP2011 1-31 A	Aposymbiotic	Ctrl	WEEK 12	4	PUPAE	AVERAGE	8
555	1	JP2011 1-31 A	Aposymbiotic	LP	WEEK 12	4	PUPAE	AVERAGE	0
556	2	JP2011 2-26	Symbiotic	Ctrl	WEEK 0-6	1	ECLOSED	TOTAL	9
557	5	JP2011 5-26	Symbiotic	Ctrl	WEEK 0-6	1	ECLOSED	TOTAL	18
558	3	JP2011 3-26	Symbiotic	LP	WEEK 0-6	1	ECLOSED	TOTAL	14
559	6	JP2011 6-26	Symbiotic	LP	WEEK 0-6	1	ECLOSED	TOTAL	4
560	4	JP2011 4-26	Symbiotic	NP	WEEK 0-6	1	ECLOSED	TOTAL	6
561	2	JP2011 2-26	Symbiotic	NP	WEEK 0-6	1	ECLOSED	TOTAL	4
562	2	JP2011 2-31	Aposymbiotic	Ctrl	WEEK 0-6	1	ECLOSED	TOTAL	3
563	5	JP2011 5-31	Aposymbiotic	Ctrl	WEEK 0-6	1	ECLOSED	TOTAL	14
564	3	JP2011 3-31	Aposymbiotic	LP	WEEK 0-6	1	ECLOSED	TOTAL	7
565	6	JP2011 6-31	Aposymbiotic	LP	WEEK 0-6	1	ECLOSED	TOTAL	4
566	4	JP2011 4-31	Aposymbiotic	NP	WEEK 0-6	1	ECLOSED	TOTAL	5
567	2	JP2011 2-31	Aposymbiotic	NP	WEEK 0-6	1	ECLOSED	TOTAL	7
568	1	JP2011 1-26	Symbiotic	Ctrl	WEEK 0-6	2	ECLOSED	TOTAL	18
569	6	JP2011 6-26	Symbiotic	Ctrl	WEEK 0-6	2	ECLOSED	TOTAL	14
570	1	JP2011 1-26	Symbiotic	LP	WEEK 0-6	2	ECLOSED	TOTAL	7
571	5	JP2011 5-26	Symbiotic	LP	WEEK 0-6	2	ECLOSED	TOTAL	2
572	6	JP2011 6-26	Symbiotic	NP	WEEK 0-6	2	ECLOSED	TOTAL	5
573	3	JP2011 3-26	Symbiotic	NP	WEEK 0-6	2	ECLOSED	TOTAL	2
574	3	JP2011 5-31	Aposymbiotic	Ctrl	WEEK 0-6	2	ECLOSED	TOTAL	11
575	6	JP2011 6-31	Aposymbiotic	Ctrl	WEEK 0-6	2	ECLOSED	TOTAL	6
576	2	JP2011 2-31	Aposymbiotic	LP	WEEK 0-6	2	ECLOSED	TOTAL	7
577	5	JP2011 5-31	Aposymbiotic	LP	WEEK 0-6	2	ECLOSED	TOTAL	8
578	6	JP2011 6-31	Aposymbiotic	NP	WEEK 0-6	2	ECLOSED	TOTAL	10
579	3	JP2011 3-31	Aposymbiotic	NP	WEEK 0-6	2	ECLOSED	TOTAL	4
580	5	JP2011 5-26	Symbiotic	Ctrl	WEEK 0-6	3	ECLOSED	TOTAL	17
581	6	JP2011 6-26	Symbiotic	LP	WEEK 0-6	3	ECLOSED	TOTAL	23
582	3	JP2011 3-26	Symbiotic	NP	WEEK 0-6	3	ECLOSED	TOTAL	20
583	3	JP2011 5-31	Aposymbiotic	Ctrl	WEEK 0-6	3	ECLOSED	TOTAL	14
584	6	JP2011 6-31	Aposymbiotic	LP	WEEK 0-6	3	ECLOSED	TOTAL	7
585	2	JP2011 2-31	Aposymbiotic	NP	WEEK 0-6	3	ECLOSED	TOTAL	11
586	2	JP2011 2-26	Symbiotic	Ctrl	WEEK 0-6	4	ECLOSED	TOTAL	0
587	6	JP2011 6-26	Symbiotic	Ctrl	WEEK 0-6	4	ECLOSED	TOTAL	6
588	2	JP2011 2-26	Symbiotic	LP	WEEK 0-6	4	ECLOSED	TOTAL	5
589	6	JP2011 6-26	Symbiotic	LP	WEEK 0-6	4	ECLOSED	TOTAL	3
590	1	JP2011 1-26	Symbiotic	NP	WEEK 0-6	4	ECLOSED	TOTAL	5
591	6	JP2011 6-26	Symbiotic	NP	WEEK 0-6	4	ECLOSED	TOTAL	2
592	1	JP2011 1-31 A	Aposymbiotic	Ctrl	WEEK 0-6	4	ECLOSED	TOTAL	1
593	6	JP2011 6-31 B	Aposymbiotic	Ctrl	WEEK 0-6	4	ECLOSED	TOTAL	1
594	1	JP2011 1-31 A	Aposymbiotic	LP	WEEK 0-6	4	ECLOSED	TOTAL	0
595	1	JP2011 1-31 B	Aposymbiotic	LP	WEEK 0-6	4	ECLOSED	TOTAL	3
596	1	JP2011 1-31 A	Aposymbiotic	NP	WEEK 0-6	4	ECLOSED	TOTAL	2
597	1	JP2011 1-31 B	Aposymbiotic	NP	WEEK 0-6	4	ECLOSED	TOTAL	2
598	2	JP2011 2-26	Symbiotic	Ctrl	WEEK 6-12	1	ECLOSED	TOTAL	8
599	5	JP2011 5-26	Symbiotic	Ctrl	WEEK 6-12	1	ECLOSED	TOTAL	7
600	3	JP2011 3-26	Symbiotic	LP	WEEK 6-12	1	ECLOSED	TOTAL	0
601	4	JP2011 4-26	Symbiotic	NP	WEEK 6-12	1	ECLOSED	TOTAL	5
602	2	JP2011 2-26	Symbiotic	NP	WEEK 6-12	1	ECLOSED	TOTAL	0
603	5	JP2011 5-31	Aposymbiotic	Ctrl	WEEK 6-12	1	ECLOSED	TOTAL	6
604	3	JP2011 3-31	Aposymbiotic	LP	WEEK 6-12	1	ECLOSED	TOTAL	0
605	6	JP2011 6-31	Aposymbiotic	LP	WEEK 6-12	1	ECLOSED	TOTAL	6
606	4	JP2011 4-31	Aposymbiotic	NP	WEEK 6-12	1	ECLOSED	TOTAL	0
607	2	JP2011 2-31	Aposymbiotic	NP	WEEK 6-12	1	ECLOSED	TOTAL	0
608	1	JP2011 1-26	Symbiotic	Ctrl	WEEK 6-12	2	ECLOSED	TOTAL	39
609	6	JP2011 6-26	Symbiotic	Ctrl	WEEK 6-12	2	ECLOSED	TOTAL	11
610	1	JP2011 1-26	Symbiotic	LP	WEEK 6-12	2	ECLOSED	TOTAL	29
611	5	JP2011 5-26	Symbiotic	LP	WEEK 6-12	2	ECLOSED	TOTAL	7
612	6	JP2011 6-26	Symbiotic	NP	WEEK 6-12	2	ECLOSED	TOTAL	3
613	3	JP2011 3-26	Symbiotic	NP	WEEK 6-12	2	ECLOSED	TOTAL	1
614	3	JP2011 5-31	Aposymbiotic	Ctrl	WEEK 6-12	2	ECLOSED	TOTAL	9
615	6	JP2011 6-31	Aposymbiotic	Ctrl	WEEK 6-12	2	ECLOSED	TOTAL	1
616	2	JP2011 2-31	Aposymbiotic	LP	WEEK 6-12	2	ECLOSED	TOTAL	1
617	5	JP2011 5-31	Aposymbiotic	LP	WEEK 6-12	2	ECLOSED	TOTAL	9
618	6	JP2011 6-31	Aposymbiotic	NP	WEEK 6-12	2	ECLOSED	TOTAL	2
619	3	JP2011 3-31	Aposymbiotic	NP	WEEK 6-12	2	ECLOSED	TOTAL	0
620	5	JP2011 5-26	Symbiotic	Ctrl	WEEK 6-12	3	ECLOSED	TOTAL	6
621	6	JP2011 6-26	Symbiotic	LP	WEEK 6-12	3	ECLOSED	TOTAL	9
622	3	JP2011 3-26	Symbiotic	NP	WEEK 6-12	3	ECLOSED	TOTAL	5
623	3	JP2011 5-31	Aposymbiotic	Ctrl	WEEK 6-12	3	ECLOSED	TOTAL	13
624	6	JP2011 6-31	Aposymbiotic	LP	WEEK 6-12	3	ECLOSED	TOTAL	6
625	2	JP2011 2-31	Aposymbiotic	NP	WEEK 6-12	3	ECLOSED	TOTAL	0
626	2	JP2011 2-26	Symbiotic	Ctrl	WEEK 6-12	4	ECLOSED	TOTAL	3
627	6	JP2011 6-26	Symbiotic	Ctrl	WEEK 6-12	4	ECLOSED	TOTAL	8
628	2	JP2011 2-26	Symbiotic	LP	WEEK 6-12	4	ECLOSED	TOTAL	0
629	6	JP2011 6-26	Symbiotic	LP	WEEK 6-12	4	ECLOSED	TOTAL	11
630	1	JP2011 1-26	Symbiotic	NP	WEEK 6-12	4	ECLOSED	TOTAL	6
631	6	JP2011 6-26	Symbiotic	NP	WEEK 6-12	4	ECLOSED	TOTAL	0
632	1	JP2011 1-31 A	Aposymbiotic	Ctrl	WEEK 6-12	4	ECLOSED	TOTAL	5
633	6	JP2011 6-31 B	Aposymbiotic	Ctrl	WEEK 6-12	4	ECLOSED	TOTAL	0
634	1	JP2011 1-31 A	Aposymbiotic	LP	WEEK 6-12	4	ECLOSED	TOTAL	0
635	1	JP2011 1-31 B	Aposymbiotic	LP	WEEK 6-12	4	ECLOSED	TOTAL	0
636	1	JP2011 1-31 A	Aposymbiotic	NP	WEEK 6-12	4	ECLOSED	TOTAL	0
