# Supplementary material for: Metabolic plasticity supports a flexible nutritional symbiosis in Cardiocondyla ants
Source: Research Square preprint supplement (doi:10.21203/rs.3.rs-7898267/v1), 2025-11-10
Supplement: Supplementary file 8 [file Table-S7-qPCR-SymbiontDensity.xlsx]

## Sheet: 1-Life-stages
Sample	Lifestage	Replicate#	qPCR_Run	Efficiency_%	EF1_cqmean	EF1_intercept	EF1_slope	EF1_LOGcopynumber	EF1_abscopynumber	qPCR_Run	Efficiency_%	nrdB_cqmean	nrdB_intercept	nrdB_slope	nrdB_LOGcopynumber	nrdB_abscopynumber	act5/nrdB_ratio	logratio
1-26 E	Egg	1	7	85	21.61	30.422	-3.3012	2.66905	466.717	7	85	20.21	27.826	-3.3268	2.28984	194.913	0.418	-0.38
1-26 L1	L1	1	7	85	20.17	30.422	-3.3012	3.10543	1274.77	7	85	17.45	27.826	-3.3268	3.11961	1317.07	1.033	0.01
1-26 L2	L2	1	7	85	19.34	30.422	-3.3012	3.3577	2278.79	7	85	19.45	27.826	-3.3268	2.51693	328.797	0.144	-0.84
1-26 L3	L3	1	7	85	19.45	30.422	-3.3012	3.32341	2105.78	7	85	19.86	27.826	-3.3268	2.3956	248.656	0.118	-0.93
1-26 P1A	P1A	1	7	85	18.37	30.422	-3.3012	3.65061	4473.13	7	85	18.8	27.826	-3.3268	2.71424	517.897	0.116	-0.94
1-26 P1B	P1B	1	7	85	18.29	30.422	-3.3012	3.67406	4721.27	7	85	17.63	27.826	-3.3268	3.0659	1163.85	0.247	-0.61
1-26 P2	P2	1	7	85	19.37	30.422	-3.3012	3.34939	2235.56	7	85	18.51	27.826	-3.3268	2.80168	633.407	0.283	-0.55
1-26 NW	NW	1	7	85	19.64	30.422	-3.3012	3.26593	1844.7	7	85	17.39	27.826	-3.3268	3.13608	1367.97	0.742	-0.13
1-26 W	W	1	7	85	19.14	30.422	-3.3012	3.41746	2614.93	7	85	19.55	27.826	-3.3268	2.48715	307.007	0.117	-0.93
3-26 E	Egg	2	7	85	21.61	30.422	-3.3012	2.66921	466.887	7	85	20.09	27.826	-3.3268	2.32563	211.655	0.453	-0.34
3-26 L1	L1	2	7	85	19.54	30.422	-3.3012	3.29512	1972.99	7	85	17.33	27.826	-3.3268	3.15516	1429.41	0.724	-0.14
3-26 L2	L2	2	7	85	19.35	30.422	-3.3012	3.35456	2262.33	7	85	18.82	27.826	-3.3268	2.70675	509.032	0.225	-0.65
3-26 L3	L3	2	7	85	18.78	30.422	-3.3012	3.52643	3360.67	7	85	18.36	27.826	-3.3268	2.84398	698.193	0.208	-0.68
3-26 P1B	P1B	2	7	85	18.2	30.422	-3.3012	3.70313	5048.09	7	85	17.32	27.826	-3.3268	3.15823	1439.56	0.285	-0.54
3-26 P2	P2	2	7	85	18.66	30.422	-3.3012	3.56376	3662.34	7	85	17.23	27.826	-3.3268	3.18378	1526.8	0.417	-0.38
3-26 NW	NW	2	7	85	18.95	30.422	-3.3012	3.47589	2991.47	7	85	17.47	27.826	-3.3268	3.11393	1299.95	0.435	-0.36
3-26 W	W	2	7	85	19.24	30.422	-3.3012	3.38677	2436.54	7	85	17.23	27.826	-3.3268	3.1838	1526.86	0.627	-0.2
5-26 E	Egg	3	7	85	21.48	30.422	-3.3012	2.70865	511.271	7	85	19.02	27.826	-3.3268	2.64751	444.125	0.869	-0.06
5-26 L1	L1	3	7	85	19.9	30.422	-3.3012	3.18714	1538.65	7	85	17.54	27.826	-3.3268	3.09076	1232.42	0.801	-0.1
5-26 L2	L2	3	7	85	18.84	30.422	-3.3012	3.5096	3232.95	7	85	17.39	27.826	-3.3268	3.1375	1372.46	0.425	-0.37
5-26 L3	L3	3	7	85	18.87	30.422	-3.3012	3.4987	3152.81	7	85	17.86	27.826	-3.3268	2.99559	989.905	0.314	-0.5
5-26 P1A	P1A	3	7	85	16.29	30.422	-3.3012	4.28193	19139.5	7	85	18.82	27.826	-3.3268	2.70812	510.652	0.027	-1.57
5-26 P1B	P1B	3	7	85	19.29	30.422	-3.3012	3.37233	2356.86	7	85	18.07	27.826	-3.3268	2.9336	858.215	0.364	-0.44
5-26 P2	P2	3	7	85	18.57	30.422	-3.3012	3.59056	3895.44	7	85	18.71	27.826	-3.3268	2.73937	548.748	0.141	-0.85
5-26 NW	NW	3	7	85	19.12	30.422	-3.3012	3.42375	2653.07	7	85	16.55	27.826	-3.3268	3.39076	2458.99	0.927	-0.03
5-26 W	W	3	7	85	18.99	30.422	-3.3012	3.46186	2896.38	7	85	18.78	27.826	-3.3268	2.71769	522.024	0.18	-0.74

## Sheet: 2-Life-stages-for-visualisation
Lifestage	Day	mean	sd	se	ymin	ymax	log_mean	log_ymin	log_ymax
L1	3	0.977282	0.0244075	0.0140917	0.963191	0.991374	-0.00997993	-0.0162877	-0.00376244
L2	8	0.81682	0.0727002	0.0419735	0.774847	0.858794	-0.0878735	-0.110784	-0.0661112
L3	18	0.794501	0.0684784	0.039536	0.754965	0.834037	-0.0999056	-0.122073	-0.0788147
P1A	19	0.687979	0.0785239	0.0555248	0.632454	0.743504	-0.162425	-0.198971	-0.128717
P1B	21	0.852409	0.0177191	0.0102301	0.842179	0.862639	-0.0693519	-0.0745956	-0.0641708
P2	24	0.830931	0.0653963	0.0377566	0.793174	0.868688	-0.080435	-0.100631	-0.0611364
NW	26	0.948823	0.0482728	0.0278703	0.920953	0.976694	-0.0228146	-0.0357625	-0.0102416
W	30	0.817628	0.109834	0.0634125	0.754216	0.881041	-0.0874442	-0.122505	-0.0550041

## Sheet: 3-Diet-treatments
Sample#	Sample	TubeLabel	Time	Diet	Colony	Efficiency_%	EF1_cqmean	EF1_intercept	EF1_slope	EF1_LOGcopynumber	EF1_abscopynumber	Efficiency_%	nrdB_cqmean	nrdB_intercept	nrdB_slope	nrdB_LOGcopynumber	nrdB_abscopynumber	act5/nrdB_ratio	log_ratio
1	1A	6-26 CTRL CP0 ST BIII_R1	Week 0	Control	6	92	21.3	39.183	-3.521	5.0794	120059	90	22.57	38.663	-3.5661	4.51377	32642	0	-0.57
2	2A	6-26 NP CP2 ST_R1	Week 6	No Protein	6	92	22.51	39.183	-3.521	4.73466	54282	90	22.3	38.663	-3.5661	4.58954	38863	1	-0.15
3	3A	6-26 NP CP2 ST_R2	Week 6	No Protein	6	92	22.8	39.183	-3.521	4.65179	44853	90	21.63	38.663	-3.5661	4.77726	59876	1	0.13
4	4A	6-26 NP CP2 ST_R3	Week 6	No Protein	6	92	22.92	39.183	-3.521	4.61988	41676	90	23.12	38.663	-3.5661	4.3581	22808	1	-0.26
5	5A	1-26 CTRL CP4 ST BII_R1	Week 12	Control	1	92	21.41	39.183	-3.521	5.04865	111853	90	29.03	38.663	-3.5661	2.70212	504	0	-2.35
6	6A	1-26 CTRL CP4 ST BII_R2	Week 12	Control	1	92	21.62	39.183	-3.521	4.98707	97067	90	25.07	38.663	-3.5661	3.81198	6486	0	-1.18
7	7A	1-26 CTRL CP4 ST BII_R3	Week 12	Control	1	92	20.7	39.183	-3.521	5.25047	178020	90	22.75	38.663	-3.5661	4.46246	29004	0	-0.79
8	8A	6-26 NP CP0 ST BIII_R1	Week 0	No Protein	6	92	22.55	39.183	-3.521	4.72529	53124	90	22.37	38.663	-3.5661	4.56746	36936	1	-0.16
9	9A	6-26 NP CP0 ST BIII_R2	Week 0	No Protein	6	92	21.91	39.183	-3.521	4.90669	80666	90	25.73	38.663	-3.5661	3.62683	4235	0	-1.28
10	10A	6-26 NP CP0 ST BIII_R3	Week 0	No Protein	6	92	22.44	39.183	-3.521	4.75587	56999	90	22.65	38.663	-3.5661	4.49131	30996	1	-0.26
11	11A	1-26 C CP2 ST_R1	Week 6	Control	1	92	3.16	39.183	-3.521	10.2319	17056632880	90	3	38.663	-3.5661	10.0009	10019761077	1	-0.23
12	12A	1-26 C CP2 ST_R2	Week 6	Control	1	92	21.79	39.183	-3.521	4.94062	87222	90	20.99	38.663	-3.5661	4.95561	90283	1	0.01
13	13A	1-26 C CP2 ST_R3	Week 6	Control	1	92	21.93	39.183	-3.521	4.89936	79316	90	21.85	38.663	-3.5661	4.71529	51915	1	-0.18
14	14A	3-26 NP CP2 ST_R1	Week 6	Low Protein	3	92	22.52	39.183	-3.521	4.73346	54133	90	20.99	38.663	-3.5661	4.95501	90160	2	0.22
15	15A	3-26 NP CP2 ST_R2	Week 6	Low Protein	3	92	22.56	39.183	-3.521	4.7217	52686	90	25.75	38.663	-3.5661	3.62051	4174	0	-1.1
16	16A	6-26 CTRL CP3 ST BII_R1	Week 9	Control	6	92	22.58	39.183	-3.521	4.71446	51816	90	23.92	38.663	-3.5661	4.13285	13579	0	-0.58
17	17A	6-26 CTRL CP3 ST BII_R2	Week 9	Control	6	92	21.71	39.183	-3.521	4.9615	91517	90	23.24	38.663	-3.5661	4.32597	21182	0	-0.64
18	18A	6-26 CTRL CP3 ST BII_R3	Week 9	Control	6	92	25.06	39.183	-3.521	4.01082	10252	90	21.27	38.663	-3.5661	4.87692	75321	7	0.87
19	19A	6-26 CTRL CP4 ST BII_R1	Week 12	Control	6	92	21.71	39.183	-3.521	4.96359	91959	90	22.67	38.663	-3.5661	4.48333	30432	0	-0.48
20	20A	6-26 CTRL CP4 ST BII_R2	Week 12	Control	6	92	21.6	39.183	-3.521	4.99408	98645	90	21.14	38.663	-3.5661	4.91436	82104	1	-0.08
21	21A	6-26 CTRL CP4 ST BII_R3	Week 12	Control	6	92	24.21	39.183	-3.521	4.25204	17866	90	2.95	38.663	-3.5661	10.0156	10364899169	580133	5.76
22	22A	6-26 CTRL CP2 ST_R1	Week 6	Control	6	92	21.7	39.183	-3.521	4.9643	92108	90	20.3	38.663	-3.5661	5.14925	141011	2	0.18
23	23A	6-26 CTRL CP2 ST_R2	Week 6	Control	6	92	21.47	39.183	-3.521	5.03148	107518	90	19.37	38.663	-3.5661	5.41021	257167	2	0.38
24	24A	6-26 CTRL CP2 ST_R3	Week 6	Control	6	92	21.67	39.183	-3.521	4.97301	93975	90	22.13	38.663	-3.5661	4.63696	43347	0	-0.34
25	1B	1-26 CTRL CP3 ST BII_R1	Week 9	Control	1	92	20.88	39.183	-3.521	5.19703	157410	90	21.4	38.663	-3.5661	4.83968	69132	0	-0.36
26	2B	1-26 CTRL CP3 ST BII_R2	Week 9	Control	1	92	21.89	39.183	-3.521	4.91204	81665	90	20.92	38.663	-3.5661	4.97559	94534	1	0.06
27	3B	1-26 CTRL CP3 ST BII_R3	Week 9	Control	1	92	22.36	39.183	-3.521	4.77852	60051	90	20.42	38.663	-3.5661	5.11648	130760	2	0.34
28	4B	1-26 LP CP2 ST_R1	Week 6	Low Protein	1	92	3.26	39.183	-3.521	10.2026	15942840401	90	3.08	38.663	-3.5661	9.9775	9495214415	1	-0.23
29	5B	1-26 LP CP2 ST_R2	Week 6	Low Protein	1	92	22.13	39.183	-3.521	4.84294	69653	90	22.4	38.663	-3.5661	4.56017	36322	1	-0.28
30	6B	1-26 LP CP2 ST_R3	Week 6	Low Protein	1	92	22.06	39.183	-3.521	4.86246	72854	90	21.55	38.663	-3.5661	4.80017	63121	1	-0.06
31	7B	6-26 CTRL CP1 ST BIII_R1	Week 3	Control	6	92	24.15	39.183	-3.521	4.27004	18623	90	7.92	38.663	-3.5661	8.62092	417753573	22433	4.35
32	8B	6-26 CTRL CP1 ST BIII_R2	Week 3	Control	6	92	20.31	39.183	-3.521	5.35897	228545	90	20.46	38.663	-3.5661	5.10376	126987	1	-0.26
33	9B	5-26 LP CP2 ST BIII_R1	Week 6	Low Protein	5	92	23.32	39.183	-3.521	4.50581	32048	90	26.52	38.663	-3.5661	3.40471	2539	0	-1.1
34	10B	5-26 LP CP2 ST BIII_R2	Week 6	Low Protein	5	92	21.87	39.183	-3.521	4.91834	82859	90	30.99	38.663	-3.5661	2.15147	142	0	-2.77
35	11B	5-26 LP CP2 ST BIII_R3	Week 6	Low Protein	5	92	24.65	39.183	-3.521	4.12729	13406	90	25.84	38.663	-3.5661	3.59667	3951	0	-0.53
36	12B	5-26 LP CP2 ST BIII_R4	Week 6	Low Protein	5	92	21.55	39.183	-3.521	5.00817	101898	90	26.68	38.663	-3.5661	3.35893	2285	0	-1.65
37	13B	6-26 NP CP4 ST BII_R1	Week 12	No Protein	6	92	21.17	39.183	-3.521	5.11521	130380	90	19	38.663	-3.5661	5.51466	327083	3	0.4
38	14B	6-26 NP CP4 ST BII_R2	Week 12	No Protein	6	92	22.87	39.183	-3.521	4.63389	43041	90	21.11	38.663	-3.5661	4.92155	83473	2	0.29
39	15B	6-26 NP CP4 ST BII_R3	Week 12	No Protein	6	92	23.49	39.183	-3.521	4.45822	28723	90	23.52	38.663	-3.5661	4.24678	17651	1	-0.21
40	16B	3-26 NP CP1 ST BIII_R1	Week 3	No Protein	3	92	22.11	39.183	-3.521	4.84848	70548	90	22.67	38.663	-3.5661	4.48342	30438	0	-0.37
41	17B	3-26 NP CP1 ST BIII_R2	Week 3	No Protein	3	92	21.61	39.183	-3.521	4.99079	97902	90	31.21	38.663	-3.5661	2.08922	123	0	-2.9
42	18B	3-26 NP CP1 ST BIII_R3	Week 3	No Protein	3	92	22.72	39.183	-3.521	4.67528	47345	90	34.25	38.663	-3.5661	1.23698	17	0	-3.44
43	19B	1-26 LP CP3 ST BII_R1	Week 9	Low Protein	1	92	21.72	39.183	-3.521	4.96068	91343	90	19.95	38.663	-3.5661	5.24806	177035	2	0.29
44	20B	1-26 LP CP3 ST BII_R2	Week 9	Low Protein	1	92	20.81	39.183	-3.521	5.21857	165412	90	19.65	38.663	-3.5661	5.33124	214405	1	0.11
45	21B	1-26 LP CP3 ST BII_R3	Week 9	Low Protein	1	92	22.52	39.183	-3.521	4.73141	53878	90	13.19	38.663	-3.5661	7.14402	13932158	259	2.41
46	22B	6-26 NP CP2 ST BIII_R1	Week 6	No Protein	6	92	24.77	39.183	-3.521	4.09227	12367	90	19.07	38.663	-3.5661	5.49419	312029	25	1.4
47	23B	6-26 NP CP2 ST BIII_R2	Week 6	No Protein	6	92	21.28	39.183	-3.521	5.08383	121292	90	18.39	38.663	-3.5661	5.68548	484703	4	0.6
48	24B	6-26 NP CP2 ST BIII_R3	Week 6	No Protein	6	92	22.58	39.183	-3.521	4.71537	51924	90	19.62	38.663	-3.5661	5.34103	219295	4	0.63
49	1C	1-26 LP CP4 ST BII_R1	Week 12	Low Protein	1	92	21.91	39.183	-3.521	4.90616	80567	90	20.46	38.663	-3.5661	5.10455	127218	2	0.2
50	2C	1-26 LP CP4 ST BII_R2	Week 12	Low Protein	1	92	22.24	39.183	-3.521	4.81197	64859	90	17.87	38.663	-3.5661	5.83178	678862	10	1.02
51	3C	1-26 LP CP4 ST BII_R3	Week 12	Low Protein	1	92	24.64	39.183	-3.521	4.13067	13511	90	0	38.663	-3.5661	10.8418	69472989821	5142129	6.71
52	4C	1-26 LP CP4 ST BII_R4	Week 12	Low Protein	1	92	21.23	39.183	-3.521	5.10014	125932	90	19.81	38.663	-3.5661	5.28694	193617	2	0.19
53	5C	5-26 LP CP2 ST_R1	Week 6	Low Protein	5	92	21.9	39.183	-3.521	4.908	80909	90	20.42	38.663	-3.5661	5.11656	130787	2	0.21
54	6C	5-26 LP CP2 ST_R2	Week 6	Low Protein	5	92	21.35	39.183	-3.521	5.06486	116107	90	20.66	38.663	-3.5661	5.04795	111674	1	-0.02
55	7C	6-26 CTRL CP2 ST BIII_R1	Week 6	Control	6	92	20.06	39.183	-3.521	5.43088	269698	90	22.39	38.663	-3.5661	4.56279	36542	0	-0.87
56	8C	6-26 CTRL CP2 ST BIII_R2	Week 6	Control	6	92	21.27	39.183	-3.521	5.0863	121984	90	22.1	38.663	-3.5661	4.64566	44224	0	-0.44
57	9C	5-26 LP CP3 ST BII_R1	Week 9	Low Protein	5	92	21.74	39.183	-3.521	4.95371	89889	90	14.53	38.663	-3.5661	6.76627	5838048	65	1.81
58	10C	5-26 LP CP3 ST BII_R2	Week 9	Low Protein	5	92	14.57	39.183	-3.521	6.9916	9808414	90	0	38.663	-3.5661	10.8418	69472989821	7083	3.85
59	11C	5-26 LP CP3 ST BII_R3	Week 9	Low Protein	5	92	21.71	39.183	-3.521	4.96207	91636	90	22.71	38.663	-3.5661	4.47263	29692	0	-0.49
60	12C	6-26 NP CP3 ST BIII_R1	Week 9	No Protein	6	92	21.17	39.183	-3.521	5.11458	130190	90	19.67	38.663	-3.5661	5.32517	211430	2	0.21
61	13C	6-26 NP CP3 ST BIII_R2	Week 9	No Protein	6	92	23.35	39.183	-3.521	4.49757	31447	90	18.2	38.663	-3.5661	5.73755	546454	17	1.24
62	14C	6-26 NP CP1 ST BIII_R1	Week 3	No Protein	6	92	21.5	39.183	-3.521	5.02198	105191	90	20.15	38.663	-3.5661	5.19104	155255	1	0.17
63	15C	6-26 NP CP1 ST BIII_R2	Week 3	No Protein	6	92	21.73	39.183	-3.521	4.95718	90610	90	19.15	38.663	-3.5661	5.47137	296053	3	0.51
64	16C	6-26 NP CP3 ST BIII_R1	Week 9	No Protein	6	92	23.03	39.183	-3.521	4.58647	38589	90	21.72	38.663	-3.5661	4.75221	56521	1	0.17
65	17C	6-26 NP CP3 ST BIII_R2	Week 9	No Protein	6	92	22.36	39.183	-3.521	4.77838	60031	90	20.93	38.663	-3.5661	4.9722	93800	2	0.19
66	18C	6-26 NP CP3 ST BIII_R3	Week 9	No Protein	6	92	0	39.183	-3.521	11.1284	134392000000	90	3	38.663	-3.5661	10.0017	10040214444	0	-1.13
67	19C	6-26 NP ST CP4 BIII_R1	Week 12	No Protein	6	92	22.53	39.183	-3.521	4.73006	53710	90	20.37	38.663	-3.5661	5.12996	134883	3	0.4
68	20C	6-26 NP ST CP4 BIII_R2	Week 12	No Protein	6	92	22.84	39.183	-3.521	4.64267	43920	90	17.74	38.663	-3.5661	5.86589	734324	17	1.22
69	21C	6-26 NP ST CP4 BIII_R3	Week 12	No Protein	6	92	23.77	39.183	-3.521	4.37822	23890	90	19.57	38.663	-3.5661	5.35269	225262	9	0.97
70	22C	5-26 LP ST CP4 BIII_R1	Week 12	Low Protein	5	92	23.06	39.183	-3.521	4.57873	37908	90	30.11	38.663	-3.5661	2.39792	250	0	-2.18
71	23C	5-26 LP ST CP4 BIII_R2	Week 12	Low Protein	5	92	21.08	39.183	-3.521	5.14178	138604	90	0	38.663	-3.5661	10.8418	69472989821	501234	5.7
72	24C	5-26 LP ST CP4 BIII_R3	Week 12	Low Protein	5	92	21.63	39.183	-3.521	4.98648	96934	90	0	38.663	-3.5661	10.8418	69472989821	716704	5.86
73	1D	6-26 NP CP1 ST_R1	Week 3	No Protein	6	92	22.68	39.183	-3.521	4.68775	48725	90	21.96	38.663	-3.5661	4.6833	48228	1	0
74	2D	6-26 NP CP1 ST_R2	Week 3	No Protein	6	92	24.03	39.183	-3.521	4.30226	20057	90	23.88	38.663	-3.5661	4.14404	13933	1	-0.16
75	3D	6-26 NP CP1 ST_R3	Week 3	No Protein	6	92	22.63	39.183	-3.521	4.70017	50138	90	21.63	38.663	-3.5661	4.77762	59926	1	0.08
76	4D	3-26 NP ST CP1_R1	Week 3	No Protein	3	92	29.42	39.183	-3.521	2.77413	594	90	35.33	38.663	-3.5661	0.934197	9	0	-1.84
77	5D	3-26 NP ST CP1_R2	Week 3	No Protein	3	92	21.59	39.183	-3.521	4.99782	99499	90	22.89	38.663	-3.5661	4.42339	26509	0	-0.57
78	6D	5-26 LP CP1 ST_R1	Week 3	Low Protein	5	92	22.22	39.183	-3.521	4.81755	65697	90	12.75	38.663	-3.5661	7.26766	18520630	282	2.45
79	7D	5-26 LP CP1 ST_R2	Week 3	Low Protein	5	92	22.93	39.183	-3.521	4.61491	41202	90	20.84	38.663	-3.5661	4.99746	99417	2	0.38
80	8D	5-26 LP CP1 ST_R3	Week 3	Low Protein	5	92	22.48	39.183	-3.521	4.74445	55521	90	21.48	38.663	-3.5661	4.81965	66016	1	0.08
81	9D	1-26 LP CP1 ST_R1	Week 3	Low Protein	1	92	21.9	39.183	-3.521	4.90819	80944	90	21.37	38.663	-3.5661	4.84842	70538	1	-0.06
82	10D	1-26 LP CP1 ST_R2	Week 3	Low Protein	1	92	22.22	39.183	-3.521	4.81879	65885	90	20.1	38.663	-3.5661	5.20539	160469	2	0.39
83	11D	1-26 LP CP1 ST_R3	Week 3	Low Protein	1	92	22.13	39.183	-3.521	4.84331	69713	90	20.63	38.663	-3.5661	5.05583	113719	2	0.21
84	12D	1-26 CTRL CP1 ST_R1	Week 3	Control	1	92	21.47	39.183	-3.521	5.03144	107507	90	20.43	38.663	-3.5661	5.11332	129814	1	0.08
85	13D	1-26 CTRL CP1 ST_R2	Week 3	Control	1	92	22.18	39.183	-3.521	4.82854	67381	90	24.51	38.663	-3.5661	3.96817	9293	0	-0.86
86	14D	1-26 CTRL CP1 ST_R3	Week 3	Control	1	92	21.65	39.183	-3.521	4.98046	95600	90	23.73	38.663	-3.5661	4.18784	15411	0	-0.79
87	15D	6-26 CTRL CP1 ST_R1	Week 3	Control	6	92	21.65	39.183	-3.521	4.98063	95637	90	20.85	38.663	-3.5661	4.99591	99063	1	0.02
88	16D	6-26 CTRL CP1 ST_R2	Week 3	Control	6	92	21.32	39.183	-3.521	5.07449	118711	90	22.11	38.663	-3.5661	4.64193	43846	0	-0.43
89	17D	6-26 CTRL CP1 ST_R3	Week 3	Control	6	92	23.45	39.183	-3.521	4.46704	29312	90	24.28	38.663	-3.5661	4.03434	10823	0	-0.43
90	18D	4-26 NP CP0 ST_R1	Week 0	No Protein	4	92	21.33	39.183	-3.521	5.07037	117590	90	21.11	38.663	-3.5661	4.92085	83338	1	-0.15
91	19D	4-26 NP CP0 ST_R2	Week 0	No Protein	4	92	22.05	39.183	-3.521	4.86686	73596	90	30.83	38.663	-3.5661	2.19512	157	0	-2.67
92	20D	6-26 NP CP0 ST_R1	Week 0	No Protein	6	92	21.68	39.183	-3.521	4.9707	93476	90	21.72	38.663	-3.5661	4.75003	56237	1	-0.22
93	21D	6-26 NP CP0 ST_R2	Week 0	No Protein	6	92	3.13	39.183	-3.521	10.24	17377465813	90	4.18	38.663	-3.5661	9.66968	4673868604	0	-0.57
94	22D	6-26 NP CP0 ST_R3	Week 0	No Protein	6	92	21.54	39.183	-3.521	5.01059	102467	90	23.39	38.663	-3.5661	4.28305	19189	0	-0.73
95	23D	2-26 CTRL CP0 ST_R1	Week 0	Control	2	92	20.99	39.183	-3.521	5.16571	146458	90	22.9	38.663	-3.5661	4.42069	26344	0	-0.75
96	24D	3-26 LP CP0 ST_R1	Week 0	Low Protein	3	92	22.22	39.183	-3.521	4.81791	65752	90	24.74	38.663	-3.5661	3.90564	8047	0	-0.91
97	1E	3-26 LP CP0 ST_R1	Week 0	Low Protein	3	92	0	39.183	-3.521	11.1284	134392000000	90	14.01	38.663	-3.5661	6.91364	8196736	0	-4.21
98	2E	3-26 CTRL CP0 ST_R1	Week 0	Control	3	92	3.22	39.183	-3.521	10.2136	16354345870	90	3.22	38.663	-3.5661	9.93752	8659950243	1	-0.28
99	3E	3-26 CTRL CP0 ST_R2	Week 0	Control	3	92	22.11	39.183	-3.521	4.84797	70464	90	26.32	38.663	-3.5661	3.46203	2898	0	-1.39
100	4E	6-26 CTRL ST CP0_R1	Week 0	Control	6	92	21.02	39.183	-3.521	5.15858	144073	90	21.98	38.663	-3.5661	4.67687	47519	0	-0.48
101	5E	6-26 CTRL ST CP0_R2	Week 0	Control	6	92	21.78	39.183	-3.521	4.94206	87511	90	23.33	38.663	-3.5661	4.29954	19932	0	-0.64
102	6E	5-26 LP CP0 ST_R1	Week 0	Low Protein	5	92	21.57	39.183	-3.521	5.00249	100576	90	30.13	38.663	-3.5661	2.39297	247	0	-2.61
103	7E	5-26 LP CP0 ST_R2	Week 0	Low Protein	5	92	21.11	39.183	-3.521	5.13285	135786	90	20.93	38.663	-3.5661	4.97329	94036	1	-0.16
104	8E	4-26 NP CP0 ST_R1	Week 0	No Protein	4	92	22.4	39.183	-3.521	4.76772	58575	90	21.66	38.663	-3.5661	4.76774	58579	1	0
105	9E	5-26 CTRL CP0 ST_R1	Week 0	Control	5	92	22.13	39.183	-3.521	4.84269	69613	90	31.69	38.663	-3.5661	1.9542	90	0	-2.89
106	10E	5-26 CTRL CP0 ST_R2	Week 0	Control	5	92	20.34	39.183	-3.521	5.35188	224841	90	25.68	38.663	-3.5661	3.63989	4364	0	-1.71
107	11E	2-26 CTRL CP0 ST_R1	Week 0	Control	2	92	3.12	39.183	-3.521	10.241	17419697091	90	3.12	38.663	-3.5661	9.96803	9290303916	1	-0.27
108	12E	2-26 CTRL CP0 ST_R2	Week 0	Control	2	92	19.94	39.183	-3.521	5.46658	292807	90	22.33	38.663	-3.5661	4.57922	37951	0	-0.89
109	13E	3-26 LP CP0 ST_R1	Week 0	Low Protein	3	92	19.75	39.183	-3.521	5.51788	329517	90	22.16	38.663	-3.5661	4.62839	42500	0	-0.89
110	14E	1-26 LP CP0 ST_R1	Week 0	Low Protein	1	92	21.25	39.183	-3.521	5.09292	123857	90	22.63	38.663	-3.5661	4.49481	31247	0	-0.6
111	15E	1-26 LP CP0 ST_R2	Week 0	Low Protein	1	92	21.66	39.183	-3.521	4.9769	94821	90	23.07	38.663	-3.5661	4.37368	23642	0	-0.6
112	16E	1-26 LP CP0 ST_R3	Week 0	Low Protein	1	92	21.28	39.183	-3.521	5.08582	121848	90	20.57	38.663	-3.5661	5.0723	118113	1	-0.01
113	17E	1-26 LP CP0 ST_R4	Week 0	Low Protein	1	92	21.61	39.183	-3.521	4.9903	97791	90	21.99	38.663	-3.5661	4.67621	47447	0	-0.31
114	18E	3-26 NP CP0 ST_R1	Week 0	No Protein	3	92	13.63	39.183	-3.521	7.25787	18107971	90	26.69	38.663	-3.5661	3.35867	2284	0	-3.9
115	19E	3-26 NP CP0 ST_R2	Week 0	No Protein	3	92	21.77	39.183	-3.521	4.94491	88086	90	23.6	38.663	-3.5661	4.22378	16741	0	-0.72
116	20E	3-26 NP CP0 ST_R3	Week 0	No Protein	3	92	22.68	39.183	-3.521	4.68707	48649	90	24.72	38.663	-3.5661	3.90885	8107	0	-0.78
117	21E	3-26 LP CPF ST_R1	Week 12	Low Protein	3	92	23.62	39.183	-3.521	4.4211	26370	90	20.57	38.663	-3.5661	5.07222	118091	4	0.65
118	22E	3-26 LP CPF ST_R2	Week 12	Low Protein	3	92	23.64	39.183	-3.521	4.41494	25998	90	23.28	38.663	-3.5661	4.3141	20611	1	-0.1
119	23E	2-26 NP CPF ST_R1	Week 12	No Protein	2	92	23.64	39.183	-3.521	4.41394	25938	90	21.82	38.663	-3.5661	4.72176	52694	2	0.31
120	24E	5-26 CTRL CPF ST_R1	Week 12	Control	5	92	21.98	39.183	-3.521	4.88452	76651	90	23.29	38.663	-3.5661	4.31002	20418	0	-0.57
121	1F	5-26 CTRL CPF ST_R2	Week 12	Control	5	92	29.84	39.183	-3.521	2.65289	450	90	31.34	38.663	-3.5661	2.05359	113	0	-0.6
122	2F	5-26 CTRL CPF ST_R3	Week 12	Control	5	92	22.08	39.183	-3.521	4.85669	71893	90	21.67	38.663	-3.5661	4.76399	58075	1	-0.09
123	3F	4-26 NP ST CP3_R1	Week 9	No Protein	4	92	32.57	39.183	-3.521	1.87728	75	90	37.55	38.663	-3.5661	0.312941	2	0	-1.56
124	4F	2-26 CTRL CP1 ST_R1	Week 3	Control	2	92	21.72	39.183	-3.521	4.95938	91072	90	25.07	38.663	-3.5661	3.81291	6500	0	-1.15
125	5F	2-26 CTRL CP1 ST_R2	Week 3	Control	2	92	21.3	39.183	-3.521	5.07984	120181	90	20.52	38.663	-3.5661	5.08664	122079	1	0.01
126	6F	2-26 CTRL CP1 ST_R3	Week 3	Control	2	92	21.12	39.183	-3.521	5.13027	134979	90	23.65	38.663	-3.5661	4.20986	16213	0	-0.92
127	7F	2-26 NP CP1 ST_R1	Week 3	No Protein	2	92	22.17	39.183	-3.521	4.83122	67798	90	25.18	38.663	-3.5661	3.78228	6057	0	-1.05
128	8F	2-26 NP CP1 ST_R2	Week 3	No Protein	2	92	22.22	39.183	-3.521	4.81866	65866	90	24.63	38.663	-3.5661	3.93598	8629	0	-0.88
129	9F	2-26 NP CP1 ST_R3	Week 3	No Protein	2	92	21.17	39.183	-3.521	5.11543	130446	90	19.86	38.663	-3.5661	5.27271	187375	1	0.16
130	10F	1-26 CTRL CP0 ST_R1	Week 0	Control	1	92	21.75	39.183	-3.521	4.95187	89509	90	21.14	38.663	-3.5661	4.91312	81869	1	-0.04
131	11F	1-26 CTRL CP0 ST_R2	Week 0	Control	1	92	21.68	39.183	-3.521	4.9708	93497	90	22.13	38.663	-3.5661	4.63533	43185	0	-0.34
132	12F	1-26 CTRL CP0 ST_R3	Week 0	Control	1	92	21.36	39.183	-3.521	5.06057	114966	90	22.35	38.663	-3.5661	4.57399	37497	0	-0.49
133	13F	5-26 CTRL CP3 ST_R1	Week 9	Control	5	92	21.11	39.183	-3.521	5.13251	135679	90	21.04	38.663	-3.5661	4.94293	87686	1	-0.19
134	14F	5-26 CTRL CP3 ST_R2	Week 9	Control	5	92	20.76	39.183	-3.521	5.23178	170523	90	20.82	38.663	-3.5661	5.00288	100665	1	-0.23
135	15F	5-26 CTRL CP1 ST_R1	Week 3	Control	5	92	21.77	39.183	-3.521	4.94465	88033	90	26.9	38.663	-3.5661	3.2998	1994	0	-1.64
136	16F	5-26 CTRL CP1 ST_R2	Week 3	Control	5	92	21.88	39.183	-3.521	4.91395	82027	90	26.86	38.663	-3.5661	3.31058	2044	0	-1.6
137	17F	4-26 NP CP1 ST_R1	Week 3	No Protein	4	92	20.9	39.183	-3.521	5.19301	155960	90	21.98	38.663	-3.5661	4.67886	47737	0	-0.51
138	18F	4-26 NP CP1 ST_R2	Week 3	No Protein	4	92	19.43	39.183	-3.521	5.60975	407148	90	25.53	38.663	-3.5661	3.6817	4805	0	-1.93
139	19F	3-26 LP CP3 ST_R1	Week 9	Low Protein	3	92	21.62	39.183	-3.521	4.98885	97466	90	19.71	38.663	-3.5661	5.31472	206404	2	0.33
140	20F	2-26 NP CP3 ST_R1	Week 9	No Protein	2	92	22.7	39.183	-3.521	4.68272	48164	90	20.13	38.663	-3.5661	5.1964	157180	3	0.51
141	21F	3-26 LP CP1 ST_R1	Week 3	Low Protein	3	92	14.21	39.183	-3.521	7.09228	12367547	90	23.1	38.663	-3.5661	4.36347	23092	0	-2.73
142	22F	3-26 LP CP1 ST_R2	Week 3	Low Protein	3	92	22.11	39.183	-3.521	4.84761	70406	90	21.97	38.663	-3.5661	4.68004	47867	1	-0.17
143	23F	2-26 NP CP2 ST_R1	Week 6	No Protein	2	92	21.47	39.183	-3.521	5.0316	107548	90	18.93	38.663	-3.5661	5.53364	341693	3	0.5
144	24F	5-26 CTRL CP2 ST_R2	Week 6	Control	5	92	21.58	39.183	-3.521	5.00036	100082	90	21.11	38.663	-3.5661	4.9221	83580	1	-0.08
145	1G	5-26 CTRL CP2 ST_R3	Week 6	Control	5	92	21.85	39.183	-3.521	4.9222	83599	90	21.83	38.663	-3.5661	4.72064	52558	1	-0.2
146	2G	4-26 NP ST CP2_R1	Week 6	No Protein	4	92	23.77	39.183	-3.521	4.37864	23913	90	20.56	38.663	-3.5661	5.07596	119113	5	0.7
147	3G	4-26 NP ST CP2_R2	Week 6	No Protein	4	92	23.11	39.183	-3.521	4.56401	36645	90	20.32	38.663	-3.5661	5.14472	139547	4	0.58
148	4G	3-26 LP CP2 ST_R1	Week 6	Low Protein	3	92	22.66	39.183	-3.521	4.69342	49365	90	22.91	38.663	-3.5661	4.41653	26094	1	-0.28
149	5G	3-26 LP CP2 ST_R2	Week 6	Low Protein	3	92	22.56	39.183	-3.521	4.71972	52447	90	21.67	38.663	-3.5661	4.76629	58384	1	0.05
150	6G	2-26 CTRL CP2 ST_R1	Week 6	Control	2	92	22.75	39.183	-3.521	4.66574	46317	90	23.12	38.663	-3.5661	4.35728	22766	0	-0.31
151	7G	2-26 CTRL CP2 ST_R2	Week 6	Control	2	92	21.89	39.183	-3.521	4.91131	81528	90	21.02	38.663	-3.5661	4.94837	88792	1	0.04
152	8G	2-26 CTRL CP3 ST_R1	Week 9	Control	2	92	21.85	39.183	-3.521	4.92416	83976	90	25.41	38.663	-3.5661	3.7174	5217	0	-1.21
153	9G	2-26 CTRL CP3 ST_R2	Week 9	Control	2	92	21.9	39.183	-3.521	4.90806	80921	90	21.34	38.663	-3.5661	4.85839	72176	1	-0.05
154	10G	2-26 CTRL BIV CP0 ST_R1	Week 0	Control	2	92	20.24	39.183	-3.521	5.37967	239701	90	23.56	38.663	-3.5661	4.23513	17184	0	-1.14
155	11G	2-26 CTRL BIV CP0 ST_R2	Week 0	Control	2	92	22.2	39.183	-3.521	4.82271	66483	90	25.41	38.663	-3.5661	3.7167	5208	0	-1.11
156	12G	2-26 CTRL BIV CP0 ST_R3	Week 0	Control	2	92	21.72	39.183	-3.521	4.95944	91085	90	27.9	38.663	-3.5661	3.01931	1045	0	-1.94
157	13G	2-26 CTRL CP3 BIV ST_R1	Week 9	Control	2	92	22.59	39.183	-3.521	4.71255	51588	90	22.79	38.663	-3.5661	4.45171	28295	1	-0.26
158	14G	2-26 CTRL CP3 BIV ST_R2	Week 9	Control	2	92	23.79	39.183	-3.521	4.37058	23474	90	24.26	38.663	-3.5661	4.03918	10944	0	-0.33
159	15G	6-26 CTRL BIV ST CP0_R1	Week 0	Control	6	92	23.63	39.183	-3.521	4.41612	26069	90	16.19	38.663	-3.5661	6.30241	2006383	77	1.89
160	16G	6-26 CTRL BIV ST CP0_R2	Week 0	Control	6	92	16.51	39.183	-3.521	6.43884	2746870	90	23.05	38.663	-3.5661	4.37871	23917	0	-2.06
161	17G	6-26 CTRL BIV CP1 ST_R1	Week 3	Control	6	92	21.73	39.183	-3.521	4.95598	90361	90	23.22	38.663	-3.5661	4.33081	21420	0	-0.63
162	18G	6-26 CTRL BIV CP1 ST_R2	Week 3	Control	6	92	21.26	39.183	-3.521	5.08995	123013	90	21.75	38.663	-3.5661	4.7441	55475	0	-0.35
163	19G	2-26 CTRL CP2 BIV ST_R1	Week 6	Control	2	92	20.62	39.183	-3.521	5.2733	187627	90	22.23	38.663	-3.5661	4.60808	40559	0	-0.67
164	20G	2-26 CTRL CP2 BIV ST_R2	Week 6	Control	2	92	22.38	39.183	-3.521	4.77122	59050	90	23.48	38.663	-3.5661	4.25815	18120	0	-0.51
165	21G	1-26NP BIV CP1 ST_R1	Week 3	No Protein	1	92	22.27	39.183	-3.521	4.80406	63688	90	14.86	38.663	-3.5661	6.67585	4740816	74	1.87
166	22G	1-26NP BIV CP1 ST_R2	Week 3	No Protein	1	92	23.11	39.183	-3.521	4.56556	36776	90	23.86	38.663	-3.5661	4.15141	14171	0	-0.41
167	23G	1-26NP BIV CP1 ST_R3	Week 3	No Protein	1	92	22.2	39.183	-3.521	4.82233	66424	90	21.39	38.663	-3.5661	4.84464	69926	1	0.02
168	24G	6-26 LP CP2 BIV ST_R1	Week 6	Low Protein	6	92	22.84	39.183	-3.521	4.64223	43876	90	21.84	38.663	-3.5661	4.71674	52088	1	0.07
169	1H	6-26 LP CP2 BIV ST_R2	Week 6	Low Protein	6	92	21.09	39.183	-3.521	5.13726	137169	90	20.42	38.663	-3.5661	5.11494	130300	1	-0.02
170	2H	6-26 LP CP2 BIV ST_R3	Week 6	Low Protein	6	92	21.47	39.183	-3.521	5.02941	107007	90	24.25	38.663	-3.5661	4.04041	10975	0	-0.99
171	3H	2-26 LP BIV ST CP0_R1	Week 0	Low Protein	2	92	22.73	39.183	-3.521	4.67406	47212	90	24.48	38.663	-3.5661	3.97839	9515	0	-0.7
172	4H	2-26 LP BIV ST CP0_R2	Week 0	Low Protein	2	92	7.59	39.183	-3.521	8.97152	936518418	90	13.48	38.663	-3.5661	7.0627	11553016	0	-1.91
173	5H	2-26 LP BIV ST CP0_R3	Week 0	Low Protein	2	92	20.82	39.183	-3.521	5.21602	164446	90	24.82	38.663	-3.5661	3.88107	7605	0	-1.33
174	6H	6-26 LP CP4 BIV ST_R1	Week 12	Low Protein	6	92	21.58	39.183	-3.521	4.99913	99800	90	22.62	38.663	-3.5661	4.4983	31499	0	-0.5
175	7H	6-26 LP CP4 BIV ST_R2	Week 12	Low Protein	6	92	3.24	39.183	-3.521	10.2091	16183540194	90	3.56	38.663	-3.5661	9.84415	6984697337	0	-0.36
176	8H	6-26 LP CP4 BIV ST_R3	Week 12	Low Protein	6	92	22.44	39.183	-3.521	4.75377	56724	90	18.28	38.663	-3.5661	5.71502	518824	9	0.96
177	9H	6-26 LP CP4 BIV ST_R4	Week 12	Low Protein	6	92	2.86	39.183	-3.521	10.3169	20745177180	90	0	38.663	-3.5661	10.8418	69472989821	3	0.52
178	10H	6-26 LP BIV ST CP0_R1	Week 0	Low Protein	6	92	3.29	39.183	-3.521	10.1945	15648985329	90	0	38.663	-3.5661	10.8418	69472989821	4	0.65
179	11H	6-26 LP BIV ST CP0_R2	Week 0	Low Protein	6	92	22.36	39.183	-3.521	4.77676	59808	90	24.98	38.663	-3.5661	3.83775	6882	0	-0.94
180	12H	6-26 NP CP1 BIV ST_R1	Week 3	No Protein	6	92	24.03	39.183	-3.521	4.30325	20102	90	25.01	38.663	-3.5661	3.82909	6747	0	-0.47
181	13H	6-26 NP CP1 BIV ST_R2	Week 3	No Protein	6	92	26.67	39.183	-3.521	3.55282	3571	90	21.74	38.663	-3.5661	4.74627	55754	16	1.19
182	14H	6-26 NP CP2 BIV ST_R1	Week 6	No Protein	6	92	0	39.183	-3.521	11.1284	134392000000	90	8.84	38.663	-3.5661	8.36226	230281078	0	-2.77
183	15H	2-26 CTRL CP4 BIV ST_R1	Week 12	Control	2	92	21.64	39.183	-3.521	4.9837	96317	90	22.73	38.663	-3.5661	4.46773	29358	0	-0.52
184	16H	1-26 NP BIV ST CP0_R1	Week 0	No Protein	1	92	22.22	39.183	-3.521	4.81802	65769	90	22.57	38.663	-3.5661	4.51339	32613	0	-0.3
185	17H	6-26 CTRL CP2 BIV ST_R1	Week 0	No Protein	6	92	21.37	39.183	-3.521	5.05976	114753	90	18.22	38.663	-3.5661	5.73152	538917	5	0.67
186	18H	1-26 NP BIV ST CP0_R3	Week 0	No Protein	1	92	4.08	39.183	-3.521	9.96855	9301495582	90	0	38.663	-3.5661	10.8418	69472989821	7	0.87
187	19H	6-26 LP BIV CP1 ST_R1	Week 3	Low Protein	6	92	3.18	39.183	-3.521	10.2245	16768780319	90	0	38.663	-3.5661	10.8418	69472989821	4	0.62
188	20H	6-26 LP BIV CP1 ST_R2	Week 3	Low Protein	6	92	22.15	39.183	-3.521	4.83631	68598	90	20.47	38.663	-3.5661	5.10174	126397	2	0.27
189	21H	2-26 LP CP2 BIV ST_R1	Week 6	Low Protein	2	92	23.09	39.183	-3.521	4.57118	37254	90	27.44	38.663	-3.5661	3.14746	1404	0	-1.42
190	22H	6-26 LP CP3 BIV ST_R1	Week 9	Low Protein	6	92	20.3	39.183	-3.521	5.36346	230919	90	21.38	38.663	-3.5661	4.84634	70201	0	-0.52
191	23H	6-26 LP CP3 BIV ST_R2	Week 9	Low Protein	6	92	3.33	39.183	-3.521	10.1817	15194717877	90	15.51	38.663	-3.5661	6.49277	3110066	0	-3.69
192	24H	6-26 LP CP3 BIV ST_R3	Week 9	Low Protein	6	92	22.65	39.183	-3.521	4.69426	49461	90	28.81	38.663	-3.5661	2.76292	579	0	-1.93
193	1I	1-26NP CP4 BIV ST_R1	Week 12	No Protein	1	92	23.15	39.183	-3.521	4.55304	35731	90	20.56	38.663	-3.5661	5.07646	119251	3	0.52
194	2I	1-26NP CP4 BIV ST_R2	Week 12	No Protein	1	92	21.43	39.183	-3.521	5.04203	110161	90	20.94	38.663	-3.5661	4.9702	93369	1	-0.07
195	3I	2-26 LP BIV CP1 ST_R1	Week 3	Low Protein	2	92	20.82	39.183	-3.521	5.21658	164656	90	22.45	38.663	-3.5661	4.54641	35189	0	-0.67
196	4H	2-26 LP BIV CP1 ST_R2	Week 3	Low Protein	2	92	20.83	39.183	-3.521	5.21235	163062	90	21.55	38.663	-3.5661	4.79956	63032	0	-0.41
197	5I	6-26 NP CP2 BIV ST_R1	Week 6	No Protein	6	92	19.64	39.183	-3.521	5.55101	355637	90	19.98	38.663	-3.5661	5.23909	173418	0	-0.31
198	6I	6-26 NP CP2 BIV ST_R2	Week 6	No Protein	6	92	18.53	39.183	-3.521	5.8646	732150	90	19.21	38.663	-3.5661	5.45473	284927	0	-0.41
199	7I	1-26 NP CP3 BIV ST_R1	Week 9	No Protein	1	92	19.82	39.183	-3.521	5.49804	314807	90	19.4	38.663	-3.5661	5.4022	252463	1	-0.1
200	8I	1-26 NP CP3 BIV ST_R2	Week 9	No Protein	1	92	19.51	39.183	-3.521	5.58605	385524	90	21.37	38.663	-3.5661	4.84945	70705	0	-0.74
201	9I	6-26 NP BIV ST CP0_R1	Week 0	No Protein	6	92	20.94	39.183	-3.521	5.17979	151284	90	20.21	38.663	-3.5661	5.17562	149837	1	0
202	10I	1-26 NP BIV ST CP0_R2	Week 6	Control	1	92	22.62	39.183	-3.521	4.70402	50585	90	20.81	38.663	-3.5661	5.00762	101770	2	0.3
