# Supplementary material for: Metabolic plasticity supports a flexible nutritional symbiosis in Cardiocondyla ants
Source: Research Square preprint supplement (doi:10.21203/rs.3.rs-7898267/v1), 2025-11-10
Supplement: Supplementary file 9 [file Table-S8-MetabolomicLifestagesCalc.xlsx]

## Sheet: data entry
Plate_position	Tube-label	number/weight of ants		data_file	L-Alanine	SN	L-Arginine	SN	L-Asparagine	SN	L-Aspartic acid	SN	L-Cysteine	SN	L-Cystine	SN	L-Glutamic acid	SN	L-Glutamine	SN	L-Glycine	SN	L-Histidine	SN	L-Isoleucine	SN	L-Leucine	SN	L-Lysine	SN	L-Methionine	SN	L-Phenylalanine	SN	L-Proline	SN	L-Serine	SN	L-Threonine	SN	Tryptamine	SN	L-Tryptophane	SN	Tyramine	SN	L-Tyrosine	SN	L-Valine
	1-26 CTRL CP2 MET	1	integrated peak area of target analytes	met_1_ba4_01_56634.d.xms	49011.9	107	317967	311	27738	53	81412.6	112	0	---	0	---	1.04714e+06	2283	1.33097e+06	769	578	247000	311160	182	509830	112	1.21001e+06	753	1.61543e+06	2324	25158	21	661958	2633	1.2128e+06	1387	63388.9	279	37738.4	379	0	---	575776	758	0	---	2128221	2783	318755
	6-26 CTRL CP2 MET	1		met_2_ba5_01_56635.d.xms	98497.9	220	628324	1019	65964	77	122643	84	0	---	0	---	2.00203e+06	3775	3.78099e+06	4670	1521	27	627854	419	1.12991e+06	245	1.98876e+06	694	4.01111e+06	5637	45498	46	1.2008e+06	3480	2.27059e+06	1347	93681.9	645	119491	543	0	---	908975	1650	0	---	3539812	3673	238224
	6-26 CTRL CP2 MET BIII	1		met_3_ba6_01_56636.d.xms	78398.9	225	518200	885	52753	65	109164	160	1432.71	427307	0	---	2.155e+06	5677	3.26616e+06	2936	746	289000	395708	334	751279	126	2.2349e+06	673	3.44055e+06	4247	49377	29	1.45807e+06	5860	2.29286e+06	1820	50532.9	607	170009	776	0	---	1.39422e+06	2451	0	---	5986823	6464	327446
	6-31 LP CP0 MET BIII	1		met_4_ba7_01_56637.d.xms	656598	1070	1.24626e+06	1844	56467	96	144798	179	1099.71	15	0	---	979751	1519	1.74278e+06	1038	2699	115	552219	419	2.06364e+06	347	3.56181e+06	853	2.31665e+06	1542	129635	131	1.66057e+06	6043	5.28202e+06	2389	96190.9	389	216076	1148	0	---	1.41687e+06	1729	0	---	3127839	4818	754636
	5-31 LP CP2 MET	1		met_5_ba8_01_56638.d.xms	94077.9	187	765598	806	65168	106	114145	128	2341.71	26	0	---	1.61451e+06	3183	3.33355e+06	2039	1511	33	529856	306	1.14295e+06	205	1.64302e+06	799	3.66667e+06	4809	47313	44	1.13434e+06	5180	3.87839e+06	1421	124543	799	205229	563	0	---	424331	583	0	---	3031567	2399	363260
	6-26 CTRL CP0 BIII	1		met_6_bb1_01_56639.d.xms	48131.9	114	278605	426	25099	44	85223.6	68	0	---	0	---	1.51612e+06	3561	1.71333e+06	722	0	---	223133	107	560232	147	1.48076e+06	634	1.85563e+06	2344	47739	32	882444	2712	1.66235e+06	1054	36935.9	266	161882	792	0	---	504804	1163	0	---	3852485	4172	193842
	3-31 CTRL CP2 MET BIII	1		met_7_bb2_01_56640.d.xms	63301.9	100	655316	751	52944	60	105575	118	0	---	0	---	1.75043e+06	3360	2.41578e+06	1419	674	12	266342	152	331224	136	546325	228	2.56097e+06	2856	34820	22	657184	2473	2.35833e+06	1087	36189.9	325	127697	476	0	---	192033	371	0	---	1955030	2203	244821
	5-31 CTRL CP2 MET	1		met_8_bb3_01_56641.d.xms	64471.9	145	712201	539	41700	39	100561	72	0	---	0	---	1.39689e+06	2345	1.66605e+06	1150	598	7	194216	152	427890	100	482449	202	2.23028e+06	3196	34866	17	496128	1722	1.81786e+06	1846	15043.9	208	28696.4	189	0	---	308910	449	0	---	1287278	3207	153387
	5-26 LP CP2 MET BIII	1		met_9_bb4_01_56642.d.xms	104073	159	606021	1039	53988	64	167515	122	0	---	0	---	1.62826e+06	3321	3.0785e+06	1680	1192	24	513690	341	810730	111	2.28637e+06	735	3.17775e+06	3172	52998	35	1.47511e+06	4089	3.39499e+06	1762	280898	1118	129625	287	0	---	754581	1838	0	---	4960345	5084	356670
	6-26 CTRL CP4 BII MET	1		met_10_bb5_01_56643.d.xms	108474	226	796458	821	68676	59	156567	138	0	---	0	---	2.82435e+06	4820	4.41083e+06	3988	1119	393000	1.07718e+06	505	1.41555e+06	216	4.11123e+06	1134	4.73366e+06	5499	89341	56	2.23844e+06	13366	3.38084e+06	1335	134104	665	267506	811	0	---	1.82149e+06	2401	0	---	8686542	2843	606999
	1-26 CTRL CP4 MET BII	1		met_11_bb6_01_56648.d.xms	93889.9	225	878084	903	89155	107	140172	146	1046.71	8	0	---	2.66307e+06	5466	4.42305e+06	2635	849	19	909185	502	884177	215	2.17195e+06	646	4.77281e+06	6013	59309	37	1.52377e+06	5793	4.14567e+06	3556	64562.9	476	109949	352	0	---	1.63723e+06	2503	0	---	5304861	3526	243607
	6-26 NP CP0 MET BIII	1		met_12_bb7_01_56649.d.xms	138796	226	1.21932e+06	1588	75786	89	144691	111	1133.71	10	0	---	2.73897e+06	5917	4.34039e+06	3894	898	14	742560	410	799070	167	1.75864e+06	376	4.85881e+06	5061	58154	33	2.24637e+06	9233	4.91571e+06	2545	39238.9	324	198521	578	0	---	635171	1007	0	---	4388446	2314	151206
	3-31 NP CP0 MET BIII	1		met_13_bb8_01_56650.d.xms	18356.9	55	207872	276	15501	17	29968.6	42	0	---	0	---	750371	1440	813461	421	0	---	263617	197	823638	177	1.53749e+06	431	754064	1107	53423	37	1.55231e+06	4931	1.49215e+06	1047	0	70	0	177	0	---	654932	1382	0	---	2303954	3196	346753
	5-31 CTRL CP4 MET BII	1		met_14_bc1_01_56651.d.xms	44368.9	81	361046	455	44954	44	68481.6	103	0	---	0	---	1.24298e+06	2997	2.35597e+06	1415	0	---	493851	213	525167	98	2.0255e+06	546	2.46605e+06	2685	51407	30	1.7104e+06	5617	2.01462e+06	1032	16313.9	275	3040.36	213	0	---	1.9801e+06	3204	0	---	4457118	4403	693245
	3-31 NP CP0 MET BIII	1		met_15_bc2_01_56652.d.xms	644170	1393	1.18985e+06	1692	37468	44	7797.64	17	0	---	0	---	338310	931	415397	363	2180	33	265758	137	1.02851e+06	283	1.56538e+06	598	715285	666	59415	23	466333	2033	1.66948e+06	1661	57119.9	392	82868.4	473	0	---	291240	813	0	---	496000	875	436064
	3-31 CTRL CP0 MET BIII	1		met_16_bc3_01_56653.d.xms	86195.9	237	833406	1561	59630	85	181735	250	0	---	0	---	1.95296e+06	2373	2.51199e+06	2538	1120	14	565060	677	698804	183	1.55102e+06	444	2.77511e+06	3325	42779	31	1.36701e+06	4625	3.00199e+06	1554	163969	1334	233620	686	0	---	409609	659	0	---	2498479	3595	185933
	1-26 LP CP2 MET	1		met_17_bc4_01_56654.d.xms	84295.9	208	619671	474	55341	52	126966	123	0	---	0	---	2.61211e+06	4640	3.74341e+06	4132	668	252000	708401	309	615949	110	2.1243e+06	658	4.05367e+06	6553	42455	25	1.44893e+06	4758	2.94814e+06	2147	81074.9	419	164972	877	0	---	916256	1872	0	---	4767410	2714	339020
	5-31 LP CP4 MET BII	1		met_18_bc5_01_56655.d.xms	123185	340	1.74827e+06	1659	115908	160	186365	216	2858.71	42	0	---	3.19475e+06	5619	6.61193e+06	4871	1636	490408	1.59387e+06	605	1.65079e+06	221	2.74016e+06	617	7.22382e+06	7805	51362	27	2.02975e+06	7541	5.20171e+06	3453	110759	650	128357	542	0	---	1.32165e+06	2503	0	---	4026652	2255	509469
	6-26 CTRL CP0 MET BIII	1		met_19_bc6_01_56656.d.xms	43577.9	80	281563	364	29800	45	47941.6	53	0	---	0	---	863270	1490	1.65044e+06	918	0	---	407095	153	1.24287e+06	175	2.74232e+06	618	1.90115e+06	1839	46345	26	1.29165e+06	3424	1.03258e+06	507	13209.9	271	24527.4	219	0	---	1.17016e+06	1452	0	---	3160402	3737	342276
	1-26 LP CP4 MET BII R1	1		met_20_bc7_01_56657.d.xms	93913.9	243	1.30889e+06	2169	57119	56	119476	122	0	---	0	---	2.44582e+06	5201	3.94824e+06	2585	958	457000	536213	295	677959	189	2.48666e+06	971	4.28214e+06	4560	100869	53	1.86021e+06	9094	4.36287e+06	2876	70289.9	465	165105	497	0	---	1.18727e+06	1414	0	---	5346248	6946	432906
	1-26 LP CP4 MET BII R2	1		met_21_bc8_01_56661.d.xms	90267.9	207	1.00764e+06	3146	59389	48	144884	135	1339.71	17	0	---	2.68059e+06	4601	3.30638e+06	1798	1063	447000	679231	257	1.53156e+06	214	4.16378e+06	1207	3.59436e+06	3634	120190	63	2.68434e+06	8145	3.84554e+06	2725	134867	813	115952	672	0	---	1.61315e+06	3350	0	---	6768631	5046	605029
	3-31 NP CP0 MET BIII	1		met_22_bd1_01_56662.d.xms	75790.9	204	979596	834	76439	105	163054	178	0	---	0	---	2.91698e+06	3883	3.27264e+06	2024	815	333000	799165	368	973407	145	1.60181e+06	379	3.55063e+06	2320	49773	35	1.44732e+06	4577	3.43025e+06	2208	41072.9	324	42464.4	234	0	---	899384	1529	0	---	2340812	2190	359230
	6-26 NP CP2 MET BIII	1		met_23_bd2_01_56663.d.xms	80184.9	152	366467	715	34483	43	109005	143	0	---	0	---	1.79535e+06	3037	2.31159e+06	1821	857	354000	460637	267	902496	111	2.30255e+06	806	2.79543e+06	2247	59066	35	1.18142e+06	3409	2.1619e+06	1820	54541.9	281	111893	536	0	---	599379	992	0	---	2736465	4065	337455
	5-31 LP CP4 MET BII	1		met_24_bd3_01_56664.d.xms	116744	233	1.16907e+06	1203	83061	163	174042	163	1431.71	17	0	---	2.9463e+06	6415	4.50574e+06	3304	1771	27	1.07328e+06	424	975348	236	1.90832e+06	686	5.04583e+06	5434	54041	38	1.62901e+06	4774	4.56833e+06	2962	90401.9	502	376176	1174	0	---	668335	930	0	---	2963693	2435	463939
	6-26 CTRL CP2 MET BIII	1		met_25_bd4_01_56665.d.xms	94089.9	281	1.02504e+06	985	65686	109	168125	146	1475.71	21	0	---	2.47003e+06	6133	3.24815e+06	2410	661	298000	953897	729	717476	293	1.67418e+06	924	3.836e+06	4686	26508	17	1.41475e+06	6312	2.29244e+06	1344	74518.9	501	323350	757	0	---	784675	1698	0	---	4508949	4043	268364
	6-31 LP CP2 MET BII	1		met_26_bd5_01_56666.d.xms	81167.9	212	973171	619	80814	91	157480	153	0	---	0	---	2.20568e+06	4270	4.46446e+06	4579	0	---	1.05189e+06	424	1.38968e+06	205	2.33801e+06	853	4.87351e+06	4436	52766	40	2.03856e+06	8825	3.28187e+06	1477	54811.9	390	175793	345	0	---	1.11908e+06	1295	0	---	3289638	3301	467796
	3-26 CTRL CP0 MET	1		met_27_bd6_01_56667.d.xms	113139	383	1.00418e+06	996	87255	142	145306	172	2038.71	11	0	---	2.16233e+06	3876	3.62259e+06	1979	907	377000	925054	890	1.21787e+06	232	2.93222e+06	846	4.25264e+06	3940	56730	31	2.5007e+06	7307	2.15511e+06	1597	190976	918	107586	637	0	---	1.95729e+06	2587	0	---	6549986	3002	482308
	5-26 CTRL MET CP0	1		met_28_bd7_01_56668.d.xms	143865	465	1.40232e+06	724	109285	142	208659	217	4547.71	1708131	0	---	3.41859e+06	5012	5.79853e+06	3215	1565	541000	1.55226e+06	585	1.28067e+06	226	2.89017e+06	993	6.21096e+06	6793	96645	48	2.70835e+06	8883	3.78847e+06	1775	145744	626	260664	659	0	---	2.48427e+06	3671	0	---	5459259	1878	390453
	2-31 LP CP0 MET	1		met_29_bd8_01_56669.d.xms	148702	260	1.12322e+06	666	108897	105	232901	213	1308.71	48	0	---	3.69277e+06	6202	6.53207e+06	3215	1642	31	1.27988e+06	545	683709	139	2.61461e+06	782	7.39835e+06	9494	76713	39	2.5231e+06	8283	4.25203e+06	2488	127907	387	261760	992	0	---	2.22846e+06	2649	0	---	7245628	4454	675141
	3-31 CTRL CP0 MET	1		met_30_be1_01_56670.d.xms	103971	228	1.20797e+06	902	80725	63	185570	106	0	---	0	---	3.09933e+06	4220	3.07783e+06	1687	1165	430311	1.3012e+06	606	1.15584e+06	209	2.10763e+06	520	3.66196e+06	3012	57528	32	2.40102e+06	9370	3.89784e+06	2835	63809.9	476	62915.4	322	0	---	2.28566e+06	3445	0	---	4604201	2355	290886
	1-26 LP CP0 MET	1		met_31_be2_01_56674.d.xms	111790	273	880658	1162	78692	113	163083	163	2118.71	18	0	---	3.87366e+06	10866	4.91019e+06	4343	746	9	617518	226	1.10415e+06	202	1.95762e+06	630	5.07576e+06	5320	63405	43	2.02672e+06	5558	5.97569e+06	4174	68500.9	457	172099	655	0	---	1.74867e+06	2399	0	---	4727961	2927	293691
	6-26 CTRL CP0 MET	1		met_32_be3_01_56675.d.xms	74193.9	106	506788	312	35097	30	116342	95	0	---	0	---	2.838e+06	4271	3.2076e+06	2057	697	24	674204	304	1.0398e+06	218	2.87118e+06	638	2.9053e+06	2110	103736	62	2.9483e+06	11302	4.58407e+06	3130	60916.9	394	202257	481	17779	46	2.27742e+06	3387	0	---	7247812	4162	722897
	3-26 NP CP0 MET	1		met_33_be4_01_56676.d.xms	161551	401	1.38039e+06	1190	134488	171	306628	286	0	---	3308	14	4.26485e+06	7978	6.0897e+06	3333	1354	37	760776	274	1.32713e+06	161	2.76997e+06	552	6.34125e+06	5309	84383	64	2.84385e+06	7559	5.54944e+06	2941	183757	543	238230	789	0	---	1.20453e+06	1405	0	---	4799585	2135	414118
	3-31 NP CP0 MET	1		met_34_be5_01_56677.d.xms	118385	357	2.34377e+06	1427	105202	103	220125	188	3030.71	30	3778	11	3.17556e+06	5130	4.04636e+06	1871	864	16	1.89729e+06	831	1.23869e+06	267	2.15687e+06	679	4.4867e+06	4938	60754	37	2.74219e+06	12612	3.91057e+06	2164	154323	522	213385	720	0	---	1.94559e+06	2818	0	---	5328551	2193	337310
	6-31 NP CP0 MET BII	1		met_35_be6_01_56678.d.xms	97662.9	160	1.05376e+06	1007	78761	97	166989	159	2501.71	22	0	---	2.56736e+06	4791	4.05227e+06	2542	501	245000	684885	319	587677	114	1.60895e+06	455	4.49782e+06	7918	49274	35	1.70623e+06	4272	3.23224e+06	2699	40996.9	271	93421.4	384	0	---	776792	1141	0	---	3302980	2537	355128
	6-26 NP CP0 MET	1		met_36_be7_01_56679.d.xms	90205.9	161	1.19783e+06	1127	70750	72	181825	149	3175.71	25	0	---	2.79841e+06	4522	3.63923e+06	2152	1069	395000	743600	395	508507	97	1.89019e+06	506	3.91767e+06	5096	61667	40	1.60573e+06	5374	3.07882e+06	1113	78531.9	841	349483	859	0	---	1.18973e+06	1849	0	---	5631167	2972	356153
	5-31 LP CP0 MET	1		met_37_be8_01_56680.d.xms	74786.9	136	750039	580	55772	93	89778.6	78	2849.71	24	0	---	1.74803e+06	2411	2.81117e+06	2070	932	9	746729	786	865624	210	1.98944e+06	476	3.22077e+06	3725	48400	33	2.89519e+06	7589	2.47588e+06	1492	63829.9	276	177019	1182	0	---	2.67203e+06	3962	0	---	7788614	3326	451856
	4-26 NP CP2 MET	1		met_38_ga1_01_56681.d.xms	74498.9	217	955206	727	60078	96	135226	146	4407.71	54	0	---	2.58905e+06	4780	3.77233e+06	2827	675	295000	509261	325	750748	159	1.6327e+06	549	3.91551e+06	4777	54026	36	1.06705e+06	3485	2.86007e+06	1784	76145.9	373	232150	635	0	---	1.00185e+06	1767	0	---	4056685	3033	488232
	1-26 CTRL CP0 MET	1		met_39_ga2_01_56682.d.xms	119923	205	1.31849e+06	2040	84877	154	161270	154	2701.71	19	0	---	3.10387e+06	6858	5.0452e+06	3115	1295	14	870376	395	914533	167	2.10401e+06	571	5.59786e+06	6637	60722	45	1.95735e+06	5850	3.89197e+06	2856	105877	610	153398	808	0	---	811514	1294	0	---	5843246	2582	388243
	4-26 NP CP2 MET	1		met_40_ga3_01_56683.d.xms	55159.9	165	850051	699	54474	124	82576.6	71	0	---	0	---	1.48406e+06	2837	2.37091e+06	1124	0	---	448623	196	870834	252	1.38437e+06	635	3.13174e+06	3774	30315	18	1.10436e+06	3405	1.7854e+06	1205	28470.9	347	14503.4	374	0	---	894580	953	0	---	3604386	2376	124440
	5-26 CTRL CP2 MET	1		met_41_ga4_01_56688.d.xms	117893	238	593753	691	68553	89	204172	125	2219.71	18	0	---	2.67999e+06	5115	3.35729e+06	1877	1310	48	234019	135	512742	94	1.43185e+06	612	3.30425e+06	2934	48149	28	1.11257e+06	4340	3.10667e+06	2152	122626	728	178100	747	0	---	876037	1603	0	---	4208614	4489	210874
	6-31 LP CP2 MET	1		met_42_ga5_01_56689.d.xms	91959.9	189	1.38508e+06	1502	90913	108	166493	160	1458.71	47	0	---	2.47437e+06	5199	5.78698e+06	3101	780	312458	1.1296e+06	375	476804	146	1.35061e+06	442	6.36174e+06	5408	51343	24	673853	1645	3.32428e+06	2245	181966	1029	108668	554	0	---	962006	1536	0	---	1974628	2370	594747
	1-31A CTRL BIV MET CP0	1		met_43_ga6_01_56690.d.xms	78743.9	182	701600	929	44476	65	90873.6	69	0	---	0	---	1.72067e+06	2749	1.90434e+06	1873	675	20	610806	533	614947	164	1.46733e+06	574	2.80347e+06	2018	33255	21	1.44181e+06	5715	2.36426e+06	1504	16731.9	225	159651	577	0	---	422130	690	0	---	3772503	2665	309952
	6-26 LP CP2 BIV MET	1		met_44_ga7_01_56691.d.xms	65576.9	95	512837	1020	32139	46	74953.6	95	0	---	0	---	1.51058e+06	2424	1.80926e+06	1338	0	---	478365	338	638490	236	1.96351e+06	651	2.59291e+06	2122	31097	24	1.37547e+06	4402	1.69023e+06	1388	44730.9	425	98163.4	347	0	---	1.59787e+06	3022	0	---	5733763	3854	262627
	6-26 CTRL CP2 BIV MET	1		met_45_ga8_01_56692.d.xms	118606	263	1.54572e+06	1216	58444	78	239742	264	4038.71	39	0	---	3.50041e+06	8618	3.33998e+06	3758	1123	419000	748136	320	584375	127	2.5128e+06	754	3.89395e+06	2672	61124	54	1.39469e+06	5397	3.87232e+06	3591	114297	742	225529	741	0	---	717259	1801	0	---	4077826	4709	456353
	6-31B CTRL BIV MET CP0	1		met_46_gb1_01_56693.d.xms	104281	312	716005	370	55739	96	135888	189	3043.71	36	0	---	2.53992e+06	5241	3.01061e+06	1694	0	---	466767	123	1.13926e+06	207	2.18673e+06	1006	3.4082e+06	4706	55886	57	2.08091e+06	8000	3.67782e+06	3828	44401.9	193	152542	409	0	---	851199	1386	0	---	5376520	2769	0
	1-31A CTRL CP2 BIV MET	1		met_47_gb2_01_56694.d.xms	90289.9	155	768022	793	58564	66	232489	215	2249.71	12	0	---	1.5713e+06	2556	1.98018e+06	1317	1376	573000	519007	373	513205	145	994382	432	3.0279e+06	2847	28524	24	1.17722e+06	3842	1.97844e+06	1996	318122	1480	129165	517	0	---	172830	422	0	---	3278645	2997	225002
	6-26 CTRL BIV MET CP0 R1	1		met_48_gb3_01_56695.d.xms	289735	817	613836	551	53374	53	75339.6	124	0	---	0	---	2.37312e+06	2754	3.13357e+06	3410	797	283000	501030	129	1.30508e+06	290	3.10874e+06	908	3.2768e+06	3521	101945	75	2.24398e+06	9196	3.6403e+06	3602	83189.9	535	299959	912	0	---	916890	1235	0	---	6339339	4397	547304
	6-26 CTRL BIV MET CP0 R2	1		met_49_gb4_01_56696.d.xms	86188.9	187	965505	1487	39336	55	111892	140	5209.71	30	14716	27	1.96891e+06	2950	2.40334e+06	1909	810	102	679247	391	988434	265	2.87723e+06	789	3.3573e+06	2437	51857	57	2.2417e+06	7878	1.88535e+06	1159	56696.9	209	128752	540	0	---	1.31305e+06	1921	0	---	7212075	3122	334117
	1-26 NP CP2 BIV MET	1		met_50_gb5_01_56697.d.xms	90693.9	232	1.67119e+06	1584	69475	76	200583	203	0	---	0	---	2.8087e+06	6398	3.98641e+06	3383	512	26	1.11703e+06	355	1.03768e+06	250	2.72421e+06	1045	4.1022e+06	5082	30643	26	1.04769e+06	4305	4.13073e+06	1890	171701	660	336377	1278	0	---	1.55178e+06	4056	0	---	3702817	3777	489057
	6-26 LP CP4 BIV MET	1		met_51_gb6_01_56701.d.xms	143020	339	761769	750	49769	94	65611.6	85	4123.71	29	0	---	2.52152e+06	3910	3.05169e+06	2289	0	---	362264	107	912072	121	2.17072e+06	1007	3.11203e+06	3559	42277	37	1.56156e+06	4434	3.42475e+06	3446	40068.9	263	190810	753	0	---	1.25364e+06	1893	0	---	6318472	4526	473568
	1-31A LP BIV MET CP0	1		met_52_gb7_01_56702.d.xms	112704	377	955257	2018	80461	116	186540	181	812.714	15	0	---	2.71634e+06	5454	3.36898e+06	3269	1212	32	515139	305	600082	207	1.40149e+06	619	3.73274e+06	4386	48312	29	1.21997e+06	4896	3.50419e+06	2664	63070.9	802	251761	1264	0	---	341732	660	0	---	4276939	2247	344264
	5-26 LP BIV CP4 MET	1		met_53_gb8_01_56703.d.xms	125069	237	1.25121e+06	1050	102948	104	181498	145	2739.71	20	0	---	2.95315e+06	5151	5.38365e+06	4027	1199	475000	1.04004e+06	413	895258	118	1.86176e+06	560	5.56378e+06	4529	37129	38	1.68931e+06	6476	4.07916e+06	3383	114350	572	116198	636	0	---	1.11482e+06	1801	0	---	5021673	3008	215257
	6-26 LP CP2 BIV MET	1		met_54_gc1_01_56704.d.xms	89489.9	200	852188	1008	66099	93	155989	228	2773.71	29	0	---	2.64101e+06	4759	4.14232e+06	4344	1192	493000	733877	357	671795	96	1.73448e+06	464	4.45654e+06	4789	39883	51	1.24011e+06	6222	3.10846e+06	3085	84429.9	630	136391	696	0	---	1.39652e+06	2349	0	---	7011634	3861	352108
	1-31B LP BIV MET CP0	1		met_55_gc2_01_56705.d.xms	21293.9	58	370391	532	20593	21	26225.6	34	0	---	0	---	475348	535	872264	599	0	---	286688	219	861666	283	1.66722e+06	632	1.16411e+06	965	18449	15	1.54186e+06	6956	498393	883	0	104	0	136	0	---	1.06207e+06	1772	0	---	3437990	2758	219423
	1-26 NP BIV MET CP0	1		met_56_gc3_01_56706.d.xms	314397	565	4.14776e+06	2810	197792	152	500092	604	6389.71	33	0	---	7.02121e+06	9895	9.14688e+06	7161	2825	49	3.03837e+06	1729	1.98836e+06	216	6.23027e+06	856	9.80177e+06	8763	143169	118	4.19119e+06	18582	9.2007e+06	4382	526206	1766	614757	1505	0	---	4.0795e+06	6486	0	---	14792341	3213	857487
	1-31A CTRL CP4 BIV MET R1	1		met_57_gc4_01_56707.d.xms	77970.9	299	1.41469e+06	1779	58878	43	139092	125	2495.71	12	0	---	2.02747e+06	3129	2.61964e+06	1951	1283	347000	414790	235	331535	123	802867	307	2.85406e+06	2862	23028	14	792658	3439	2.39587e+06	1205	44376.9	274	278684	674	0	---	374283	739	0	---	2397600	2627	151576
	1-31A CTRL CP4 BIV MET R2	1		met_58_gc5_01_56708.d.xms	65911.9	149	1.17425e+06	1486	56625	60	109113	128	0	---	0	---	1.72951e+06	3455	2.46814e+06	3351	1079	420000	307018	226	463669	110	777220	295	2.72508e+06	2907	27410	18	693775	3400	2.0557e+06	2263	34293.9	219	19200.4	273	0	---	354044	622	0	---	1910570	2744	195285
	1-31A CTRL CP4 BIV MET R3	1		met_59_gc6_01_56709.d.xms	37086.9	79	990794	2328	26720	45	54132.6	78	0	---	0	---	974956	1663	1.20614e+06	921	541	35	236652	266	425739	116	787692	254	1.94255e+06	1956	25807	14	980606	3855	1.01554e+06	1176	7573.86	152	0	213	0	---	219324	384	0	---	2336997	2850	150466
	1-31A CTRL CP2 BIV MET	1		met_60_gc7_01_56710.d.xms	115052	419	1.08519e+06	1242	103778	71	190954	136	3241.71	36	0	---	2.79056e+06	6470	4.71494e+06	3444	794	10	514908	159	1.01753e+06	268	1.81866e+06	756	4.9309e+06	6649	42497	39	1.26044e+06	4427	3.7096e+06	2034	129837	683	341592	1128	0	---	822538	1050	0	---	3944014	2508	211278
	2-26 CTRL CP4 BIV MET R1	1		met_61_gc8_01_56711.d.xms	138100	603	2.02255e+06	2647	82987	76	190904	305	0	---	0	---	3.60301e+06	9178	4.70881e+06	3270	911	35	765081	406	782121	124	2.53783e+06	860	5.1355e+06	4950	47193	35	1.72369e+06	5636	3.80468e+06	2195	207137	849	240379	895	0	---	1.42438e+06	2364	0	---	7618877	3147	398171
	2-26 CTRL CP4 BIV MET R2	1		met_62_gd1_01_56712.d.xms	230611	741	2.1302e+06	1332	77941	76	140093	142	4890.71	58	1895	11	4.298e+06	9236	3.49567e+06	3249	816	20	801434	248	1.44944e+06	304	3.08723e+06	652	3.58146e+06	4219	36199	25	1.29075e+06	5157	1.40824e+07	5686	241947	1338	226039	857	0	---	1.4248e+06	1940	0	---	4538274	3551	560598
	6-26 LP CP4 BIV MET	1		met_63_gd2_01_56713.d.xms	95859.9	187	755668	663	79777	89	162778	145	2774.71	37	0	---	2.72257e+06	5471	4.04939e+06	4214	781	284000	818280	618	906229	172	2.0732e+06	796	4.46387e+06	4880	42533	31	1.5202e+06	6798	3.52156e+06	3143	106302	414	270092	935	0	---	729265	1136	0	---	5636355	2799	355325
[truncated: 61 more columns]

## Sheet: result_calculation_nmol mL-1
	IS batch	MBBD1153			L-Alanine		L-Arginine		L-Asparagine		L-Aspartic Acid		L-Cysteine		L-Cystine		L-Glutamic acid		L-Glutamine		L-Glycine		L-Histidine		L-Isoleucine		L-Leucine		L-Lysine		L-Methionine		L-Phenylalanine		L-Proline		L-Serine		L-Threonine		Tryptamine		L-Tryptophane		Tyramine		L-Tyrosine		L-Valine
	Extraction volume [µl]	500	Std	fmol/ng labAA	3547	lab-Ala (BA)	579	lab-Arg (BC)	1825	lab-Asx (BE)	1825	lab-Asx (BE)	328	lab-Tyr (CC)	328	lab-Tyr (CC)	1597	lab-Glx (BG)	1597	lab-Glx (BG)	8200	lab-Gly (BI)	124	lab-His (BK)	663	lab-Ile (BM)	1324	lab-Leu (BO)	223	lab-Lys (BQ)	1398	lab-Met (BS)	454	lab-Phe (BU)	1016	lab-Pro (BW)	1222	lab-Ser (BY)	1145	lab-Thr (CA)	328	lab-Tyr (CC)	454	lab-Phe (BU)	328	lab-Tyr (CC)	328	lab-Tyr (CC)	1299
	Dilution factor	2		nmol/mL	1.7735		0.2895		0.9125		0.9125		0.164		0.164		0.7985		0.7985		4.1		0.062		0.3315		0.662		0.1115		0.699		0.227		0.508		0.611		0.5725		0.164		0.227		0.164		0.164		0.6495
	final ng labAA/mL	500	Capsule	RF	1		1		1		1		5.5		5.5		1		1		1		1		1		1		1		1		1		1		1		1		0.14		3.3		0.91		1		1
				Leaf	1		1		1		1		5.5		5.5		1		1		1		1		1		1		1		1		1		1		1		1		0.13		3.3		0.93		1		1
				Capsule	1		1		1		1		5.5		5.5		1		1		1		1		1		1		1		1		1		1		1		1		0.14		3.3		0.91		1		1
Tube-label	Plate_position	data_file	number/weight of ants	Seed	1		1		1		1		5.5		5.5		1		1		1		1		1		1		1		1		1		1		1		1		0.19		4.2		0.87		1		1
1-26 CTRL CP2 MET		met_1_ba4_01_56634.d.xms	1	sample concentration nmol/mL	0.6133		0.214545		0.550184		1.61482		0		0		1.40515		1.78602		1.28444		0.258419		0.153687		0.359927		0.542335		0.880637		0.137626		1.19475		0.36447		0.0994868		0		0.395036		0		5.06447		0.407838
6-26 CTRL CP2 MET		met_2_ba5_01_56635.d.xms	1		1.49074		0.525642		0.903521		1.67986		0		0		3.30381		6.23949		3.28648		0.567303		0.509759		0.804624		1.70809		1.49774		0.347702		2.41083		0.664048		0.412809		0		0.868565		0		6.91414		0.522505
6-26 CTRL CP2 MET BIII		met_3_ba6_01_56636.d.xms	1		1.16732		0.454445		0.803893		1.66352		0.0145995		0		3.21734		4.87627		2.34916		0.303397		0.328686		0.871677		2.16109		1.70708		0.406663		2.15827		0.382251		0.517704		0		1.28322		0		11.0921		0.658693
6-31 LP CP0 MET BIII		met_4_ba7_01_56637.d.xms	1		12.9276		1.51537		0.663168		1.70055		0.0131481		0		2.09274		3.72257		7.26347		0.496917		0.876333		1.35662		1.36303		5.67229		0.436472		7.36605		0.908527		0.924317		0		1.22898		0		6.79933		1.67185
5-31 LP CP2 MET		met_5_ba8_01_56638.d.xms	1		1.00434		0.494673		0.953428		1.66997		0.0234454		0		1.92705		3.97887		2.77248		0.367024		0.346113		0.480472		1.21813		1.32712		0.241024		3.15921		0.641711		0.504028		0		0.297535		0		5.5186		0.482582
6-26 CTRL CP0 BIII		met_6_bb1_01_56639.d.xms	1		0.72642		0.204883		0.478039		1.62318		0		0		2.11279		2.38761		0		0.144564		0.231548		0.544473		0.77199		1.61155		0.227239		1.46952		0.246575		0.510216		0		0.428975		0		7.81422		0.365905
3-31 CTRL CP2 MET BIII		met_7_bb2_01_56640.d.xms	1		0.818059		0.432464		0.831729		1.65854		0		0		2.1912		3.02409		1.21361		0.155302		0.11883		0.178056		0.881886		1.06317		0.150414		1.83363		0.213636		0.335335		0		0.14504		0		3.07542		0.387411
5-31 CTRL CP2 MET		met_8_bb3_01_56641.d.xms	1		0.967339		0.59069		0.68464		1.65103		0		0		2.24919		2.68257		1.15569		0.201433		0.162701		0.1661		0.959385		1.36389		0.123001		1.85859		0.106904		0.0879102		0		0.252731		0		2.34179		0.305269
5-26 LP CP2 MET BIII		met_9_bb4_01_56642.d.xms	1		2.0232		0.536747		0.553184		1.71643		0		0		2.70825		5.12039		3.55433		0.521354		0.292538		0.742349		1.3784		1.58953		0.350514		2.54876		2.28284		0.491649		0		0.591697		0		8.19103		0.616042
6-26 CTRL CP4 BII MET		met_10_bb5_01_56643.d.xms	1		1.58458		0.622319		0.749769		1.70931		0		0		3.98158		6.21808		2.36551		0.695524		0.572367		1.4695		1.68417		3.15178		0.602846		2.81588		0.883837		0.826073		0		1.61883		0		17.01		1.24752
1-26 CTRL CP4 MET BII		met_11_bb6_01_56648.d.xms	1		1.43304		0.562537		1.07919		1.69673		0.0112277		0		3.39914		5.64557		2.13552		0.699503		0.31634		0.732628		1.58187		2.01654		0.377801		3.25782		0.412503		0.307071		0		1.33958		0		10.3461		0.409426
6-26 NP CP0 MET BIII		met_12_bb7_01_56649.d.xms	1		1.98621		0.910255		0.89067		1.70047		0.0128072		0		4.1174		6.52475		2.26294		0.417863		0.29941		0.604802		1.75904		2.2801		0.563526		4.36055		0.268296		0.600402		0		0.525819		0		9.0136		0.316015
3-31 NP CP0 MET BIII		met_13_bb8_01_56650.d.xms	1		0.946933		0.346901		0.697383		1.34827		0		0		2.73255		2.9623		0		0.451355		0.315539		0.521071		0.640385		1.73087		0.41833		4.09414		0		0		0		0.582438		0		4.7049		0.797228
5-31 CTRL CP4 MET BII		met_14_bc1_01_56651.d.xms	1		1.56482		0.464989		1.03747		1.58045		0		0		3.85564		7.30804		0		0.641842		0.198962		0.68205		1.55986		1.82538		0.438727		3.2905		0.245092		0.0223868		0		1.67609		0		11.5644		1.54348
3-31 NP CP0 MET BIII		met_15_bc2_01_56652.d.xms	1		7.46419		0.709142		3.71747		0.77366		0		0		0.363174		0.445927		3.85425		0.160676		0.328791		0.464495		0.234479		2.05594		0.128065		1.49814		0.304193		0.189471		0		0.263935		0		1.0318		0.682858
3-31 CTRL CP0 MET BIII		met_16_bc3_01_56653.d.xms	1		1.27327		0.611131		0.56582		1.72445		0		0		2.71493		3.49206		2.50245		0.421889		0.264769		0.522379		1.06996		1.56108		0.370731		2.29496		1.11568		0.670114		0		0.366582		0		4.78462		0.386315
1-26 LP CP2 MET		met_17_bc4_01_56654.d.xms	1		1.01079		0.335445		0.734195		1.68442		0		0		2.73682		3.92212		1.29986		0.431935		0.208913		0.673548		1.16578		1.57696		0.343203		2.04082		0.41758		0.371118		0		0.716199		0		9.12518		0.638441
5-31 LP CP4 MET BII		met_18_bc5_01_56655.d.xms	1		1.47941		1.00126		1.07398		1.72682		0.0299055		0		3.77702		7.81701		3.09748		1.08095		0.663636		0.969496		2.19925		2.24978		0.563475		4.03256		0.596754		0.298484		0		1.21077		0		7.65882		1.11762
6-26 CTRL CP0 MET BIII		met_19_bc6_01_56656.d.xms	1		1.58179		0.408492		0.929055		1.49464		0		0		3.33307		6.37233		0		0.657905		0.488579		0.968108		1.43832		1.6034		0.470117		2.84513		0.211466		0.204932		0		1.40546		0		8.85303		0.550173
1-26 LP CP4 MET BII R1		met_20_bc7_01_56657.d.xms	1		1.52288		0.877568		0.801419		1.67633		0		0		3.5652		5.75523		2.67926		0.352133		0.278051		0.907326		1.44389		3.54576		0.489713		3.65596		0.4824		0.504752		0		1.03144		0		10.2036		0.905269
1-26 LP CP4 MET BII R2		met_21_bc8_01_56661.d.xms	1		1.78405		1.14255		0.697099		1.70062		0.0165436		0		4.65476		5.74144		3.00262		0.789396		0.690346		1.60788		1.67609		4.25252		0.710335		3.33911		1.21945		0.451937		0		1.40868		0		15.197		1.37687
3-31 NP CP0 MET BIII		met_22_bd1_01_56662.d.xms	1		1.01182		0.56893		0.803347		1.71364		0		0		3.36094		3.77073		1.69147		0.531759		0.41876		0.602154		1.08396		1.86399		0.364111		2.48567		0.248607		0.106001		0		0.746667		0		4.66084		0.701609
6-26 NP CP2 MET BIII		met_23_bd2_01_56663.d.xms	1		0.983825		0.241415		0.526179		1.66331		0		0		2.2765		2.93109		1.71526		0.358142		0.329675		0.766466		0.952179		2.19204		0.272612		1.85016		0.310949		0.29265		0		0.456411		0		5.02663		0.646521
5-31 LP CP4 MET BII		met_24_bd3_01_56664.d.xms	1		1.12295		0.479349		0.820992		1.72026		0.0157211		0		2.74662		4.20037		2.9027		0.307925		0.367441		0.622462		1.18061		1.74173		0.373677		2.79982		0.380406		0.726929		0		0.505919		0		5.91695		0.756495
6-26 CTRL CP2 MET BIII		met_25_bd4_01_56665.d.xms	1		1.24366		0.535566		0.670749		1.7168		0.0160856		0		3.32612		4.37394		1.75525		0.500816		0.325863		0.645439		1.17625		1.14753		0.37879		2.40703		0.433091		0.877682		0		0.693301		0		8.9361		0.645083
6-31 LP CP2 MET BII		met_26_bd5_01_56666.d.xms	1		1.42034		0.61958		0.877493		1.70994		0		0		3.21874		6.51498		0		0.512313		0.598092		0.861084		1.60841		1.87673		0.454934		2.75277		0.390956		0.566636		0		0.824142		0		6.48925		0.897722
3-26 CTRL CP0 MET		met_27_bd6_01_56667.d.xms	1		1.89415		0.853446		1.02141		1.70096		0.022135		0		4.04887		6.78313		2.38378		1.07022		0.569703		1.07626		2.17673		2.28029		0.635126		3.67477		1.43377		0.39238		0		1.64047		0		12.9301		0.984505
5-26 CTRL MET CP0		met_28_bd7_01_56668.d.xms	1		1.86318		0.813303		0.909649		1.7368		0.053423		0		4.61482		7.82756		3.63232		0.934378		0.577432		1.10817		2.07458		3.08865		0.661604		3.75871		0.905333		0.69991		0		2.00266		0		11.6602		0.883709
2-31 LP CP0 MET		met_29_bd8_01_56669.d.xms	1		1.76499		0.643008		0.816179		1.74558		0.0143057		0		3.97106		7.02434		3.06079		0.88844		0.308708		1.01707		2.03109		2.55017		0.623264		2.92053		0.668338		0.604069		0		1.81659		0		14.4005		1.28842
3-31 CTRL CP0 MET		met_30_be1_01_56670.d.xms	1		1.25303		0.757196		0.751013		1.72642		0		0		3.394		3.37046		2.12478		0.923018		0.496688		0.764271		1.13037		1.7621		0.511707		2.5713		0.362612		0.143997		0		1.6075		0		9.29322		0.523975
1-26 LP CP0 MET		met_31_be2_01_56674.d.xms	1		1.36099		0.626929		0.826887		1.71365		0.0229399		0		3.65675		4.63524		1.44274		0.5645		0.459998		0.72564		2.6992		1.58808		0.387547		3.28001		0.470598		0.361407		0		1.10345		0		9.30745		0.425886
6-26 CTRL CP0 MET		met_32_be3_01_56675.d.xms	1		1.23546		0.44029		0.504593		1.67266		0		0		3.25587		3.6799		2.64847		0.530092		0.40156		1.06835		1.69697		2.86635		0.568377		2.72285		0.533895		0.654986		0.00505095		1.44885		0		14.7077		1.04996
3-26 NP CP0 MET		met_33_be4_01_56676.d.xms	1		1.90528		1.10213		0.773714		1.76404		0		0.037942		4.80335		6.85861		3.39535		0.605014		0.555166		0.992295		3.628		2.41801		0.594424		3.78288		1.11882		0.549696		0		0.830846		0		10.0091		0.669541
3-31 NP CP0 MET		met_34_be5_01_56677.d.xms	1		1.34331		0.991025		0.832146		1.74118		0.0367203		0.0457745		3.60649		4.59546		1.49028		0.97275		0.583727		0.845011		1.15042		2.01907		0.62856		3.17781		0.788468		0.500574		0		1.47168		0		11.7384		0.653778
6-31 NP CP0 MET BII		met_35_be6_01_56678.d.xms	1		1.14647		0.480436		0.809409		1.7161		0.029826		0		2.93094		4.62614		1.01789		0.434656		0.261237		0.61911		1.27231		1.64415		0.400847		2.62259		0.225357		0.233195		0		0.602226		0		7.15979		0.65842
6-26 NP CP0 MET		met_36_be7_01_56679.d.xms	1		0.97702		0.526911		0.671022		1.7245		0.0329803		0		2.93904		3.82212		1.80033		0.352235		0.192097		0.636618		1.05237		1.8555		0.322118		2.12912		0.372473		0.750208		0		0.787598		0		10.6328		0.562793
5-31 LP CP0 MET		met_37_be8_01_56680.d.xms	1		1.34871		0.755649		1.01404		1.63234		0.0344327		0		3.22369		5.18432		2.21583		0.711247		0.426233		0.847309		1.51655		2.21992		0.730805		2.8894		0.529874		0.703169		0		2.22577		0		17.1107		1.05975
4-26 NP CP2 MET		met_38_ga1_01_56681.d.xms	1		0.919397		0.573421		0.751892		1.69238		0.0426537		0		2.95335		4.30314		1.60435		0.376445		0.356821		0.681601		2.01389		2.00927		0.274326		2.16986		0.441763		0.5755		0		0.849968		0		7.1376		0.934411
1-26 CTRL CP0 MET		met_39_ga2_01_56682.d.xms	1		1.40888		0.639016		0.901287		1.71248		0.0277577		0		3.66785		5.96192		2.50862		0.585238		0.437731		0.906475		1.61367		2.26583		0.503503		2.77213		0.555128		0.384593		0		0.68888		0		10.9153		0.775969
4-26 NP CP2 MET		met_40_ga3_01_56683.d.xms	1		1.13888		0.707411		1.06699		1.61745		0		0		3.18323		5.08548		0		0.525866		0.47725		0.616265		1.40485		1.8468		0.285734		2.64102		0.266554		0.0619973		0		0.763806		0		6.94094		0.357172
5-26 CTRL CP2 MET		met_41_ga4_01_56688.d.xms	1		1.06012		0.342072		0.582532		1.73496		0.0218402		0		2.43838		3.05462		1.89788		0.170592		0.221239		0.520447		1.83303		1.62972		0.253529		1.76845		0.522905		0.338512		0		0.658772		0		7.52898		0.394039
6-31 LP CP2 MET		met_42_ga5_01_56689.d.xms	1		1.08093		0.616097		0.936909		1.7158		0.0132171		0		2.92706		6.84573		1.34681		0.782453		0.208169		0.522062		1.76193		1.85338		0.193729		3.17565		0.962686		0.257624		0		0.912683		0		3.25304		1.46378
1-31A CTRL BIV MET CP0		met_43_ga6_01_56690.d.xms	1		1.33915		0.54803		0.799928		1.63442		0		0		2.95955		3.27546		1.91258		0.513494		0.264028		0.514956		1.19465		1.68768		0.360917		2.7472		0.135442		0.533527		0		0.348706		0		6.56564		0.821359
6-26 LP CP2 BIV MET		met_44_ga7_01_56691.d.xms	1		1.08943		0.379177		0.685607		1.59895		0		0		2.61586		3.13308		0		0.400746		0.273474		0.694498		0.954842		1.67007		0.30713		2.00538		0.36002		0.342837		0		1.17741		0		9.92141		0.65432
6-26 CTRL CP2 BIV MET		met_45_ga8_01_56692.d.xms	1		1.26874		0.708446		0.426065		1.74775		0.0443344		0		3.60689		3.44159		1.76039		0.499749		0.273212		1.01649		1.14264		2.24105		0.364985		2.6589		0.527121		0.46299		0		0.619422		0		8.13887		1.05123
6-31B CTRL BIV MET CP0		met_46_gb1_01_56693.d.xms	1		1.19052		0.82973		0.694435		1.69298		0.0287111		0		2.73735		3.24463		0		0.478201		0.440045		0.756643		2.02605		1.87372		0.480475		2.43878		0.29592		0.349798		0		0.648579		0		9.22114		NA
1-31A CTRL CP2 BIV MET		met_47_gb2_01_56694.d.xms	1		1.40059		0.476985		0.439679		1.74545		0.0208858		0		2.30005		2.89856		3.23951		0.429954		0.21467		0.376271		0.975791		1.40688		0.300351		2.23908		2.27896		0.39286		0		0.145513		0		5.5342		0.544077
6-26 CTRL BIV MET CP0 R1		met_48_gb3_01_56695.d.xms	1		3.718		0.640951		1.13349		1.59997		0		0		2.6398		3.48571		3.2115		0.374518		0.570134		1.31072		2.27495		3.60717		0.540397		2.72237		0.50779		0.704396		0		0.728659		0		10.0822		1.18035
6-26 CTRL BIV MET CP0 R2		met_49_gb4_01_56696.d.xms	1		1.58333		0.833862		0.586084		1.66712		0.0496664		0.140294		4.06909		4.96691		1.8673		0.602772		0.522225		1.26346		1.41461		3.23095		0.590912		2.72886		0.505967		0.49122		0		1.1422		0		12.501		1.08641
1-26 NP CP2 BIV MET		met_50_gb5_01_56697.d.xms	1		1.06584		0.838488		0.6004		1.73343		0		0		3.2563		4.62169		1.02052		0.525663		0.527258		1.16644		1.18514		1.23544		0.270733		3.11588		0.948568		0.771621		0		1.32328		0		6.36843		1.25591
6-26 LP CP4 BIV MET		met_51_gb6_01_56701.d.xms	1		2.35103		0.959971		1.19185		1.57124		0.0385797		0		2.92159		3.53588		0		0.530413		0.401339		0.891838		2.66391		1.93217		0.403736		2.45507		0.352138		0.460087		0		1.06961		0		10.7478		1.01009
1-31A LP BIV MET CP0		met_52_gb7_01_56702.d.xms	1		1.26845		0.720265		0.744873		1.7269		0.00733897		0		2.92906		3.6328		2.7515		0.263001		0.260219		0.560349		2.10018		1.86148		0.316056		2.49198		0.327642		0.559855		0		0.292155		0		7.02211		0.704867
5-26 LP BIV CP4 MET		met_53_gb8_01_56703.d.xms	1		1.29713		0.608006		0.978063		1.72433		0.0259858		0		2.76571		5.04195		2.06377		0.600969		0.373814		0.689526		1.48372		1.53388		0.428775		2.77335		0.542702		0.239126		0		0.933771		0		8.65996		0.429026
6-26 LP CP2 BIV MET		met_54_gc1_01_56704.d.xms	1		0.873369		0.379171		0.724139		1.70891		0.0279314		0		2.40867		3.7779		1.7349		0.471861		0.274816		0.599111		1.31028		1.51929		0.317555		1.98146		0.369053		0.273412		0		1.18011		0		12.8377		0.659051
1-31B LP BIV MET CP0		met_55_gc2_01_56705.d.xms	1		0.992282		0.697864		1.02065		1.29982		0		0		2.84026		5.21188		0		0.709921		0.502164		0.816164		0.901395		1.73017		0.439309		2.46609		0		0		0		0.998597		0		5.76077		0.854403
1-26 NP BIV MET CP0		met_56_gc3_01_56706.d.xms	1		4.375		2.33178		0.706832		1.78713		0.0631366		0		9.86901		12.8569		6.37627		1.75299		1.01725		2.79896		3.5925		6.78821		1.19731		8.92925		3.39198		1.68895		0		3.84585		0		26.575		2.36693
1-31A CTRL CP4 BIV MET R1		met_57_gc4_01_56707.d.xms	1		0.804217		0.641187		0.717842		1.69581		0.0221277		0		1.98998		2.5712		2.06448		0.164227		0.129384		0.284736		0.669139		0.912996		0.19551		1.68308		0.202454		0.610702		0		0.304647		0		3.86506		0.27484
1-31A CTRL CP4 BIV MET R2		met_58_gc5_01_56708.d.xms	1		0.85977		0.746371		0.863265		1.66346		0		0		2.33678		3.33476		2.21527		0.276599		0.239559		0.325179		1.06856		1.2377		0.185418		2.01488		0.208876		0.0515951		0		0.31225		0		3.23957		0.415147
1-31A CTRL CP4 BIV MET R3		met_59_gc6_01_56709.d.xms	1		0.88087		0.863044		0.753356		1.52624		0		0		2.4814		3.0698		2.17461		0.298141		0.20071		0.326857		0.973005		1.35043		0.253376		2.05543		0.0863299		0		0		0.187012		0		3.98668		0.347234
1-31A CTRL CP2 BIV MET		met_60_gc7_01_56710.d.xms	1		1.15182		0.767352		0.939692		1.72905		0.028877		0		2.75282		4.65118		1.39179		0.407673		0.427522		0.737034		2.81223		1.59706		0.335205		2.37543		0.646262		0.687228		0		0.721866		0		6.38782		0.635047
2-26 CTRL CP4 BIV MET R1		met_61_gc8_01_56711.d.xms	1		1.44244		0.892402		0.751619		1.72903		0		0		3.63758		4.75399		1.31471		0.446838		0.366745		0.974406		1.33452		1.91146		0.46477		2.52782		0.945852		0.509864		0		1.26742		0		12.1633		0.988244
2-26 CTRL CP4 BIV MET R2		met_62_gd1_01_56712.d.xms	1		2.27969		1.59805		0.943946		1.69667		0.0544781		0.0211086		3.89285		3.16615		1.43742		0.920702		0.632102		1.24359		2.09388		1.42871		0.318181		8.77537		1.19977		0.414841		0		1.15904		0		9.19132		1.13264
6-26 LP CP4 BIV MET		met_63_gd2_01_56713.d.xms	1		0.994636		0.331001		0.839763		1.71346		0.0296797		0		2.81062		4.18035		1.47835		0.393001		0.356003		0.772909		1.04553		1.67941		0.374912		2.26087		0.486624		0.566864		0		0.593509		0		10.9617		0.630915
[truncated: 29 more columns]

## Sheet: summary_nmol µL-1
WEEK	DIET	SYMBIOTIC STATUS	group	sample_ID	data_file	L-Alanine	L-Arginine	L-Asparagine	L-Aspartic Acid	L-Cysteine	L-Cystine	L-Glutamic acid	L-Glutamine	L-Glycine	L-Histidine	L-Isoleucine	L-Leucine	L-Lysine	L-Methionine	L-Phenylalanine	L-Proline	L-Serine	L-Threonine	Tryptamine	L-Tryptophane	Tyramine	L-Tyrosine	L-Valine
WEEK 6	Ctrl	Symbiotic	WEEK 6_Ctrl_Symbiotic	1-26 CTRL CP2 MET	met_1_ba4_01_56634.d.xms	0.0006133	0.000214545	0.000550184	0.00161482	0	0	0.00140515	0.00178602	0.00128444	0.000258419	0.000153687	0.000359927	0.000542335	0.000880637	0.000137626	0.00119475	0.00036447	9.94868e-05	0	0.000395036	0	0.00506447	0.000407838
WEEK 6	Ctrl	Symbiotic	WEEK 6_Ctrl_Symbiotic	6-26 CTRL CP2 MET	met_2_ba5_01_56635.d.xms	0.00149074	0.000525642	0.000903521	0.00167986	0	0	0.00330381	0.00623949	0.00328648	0.000567303	0.000509759	0.000804624	0.00170809	0.00149774	0.000347702	0.00241083	0.000664048	0.000412809	0	0.000868565	0	0.00691414	0.000522505
WEEK 6	Ctrl	Symbiotic	WEEK 6_Ctrl_Symbiotic	6-26 CTRL CP2 MET BIII	met_3_ba6_01_56636.d.xms	0.00116732	0.000454445	0.000803893	0.00166352	1.45995e-05	0	0.00321734	0.00487627	0.00234916	0.000303397	0.000328686	0.000871677	0.00216109	0.00170708	0.000406663	0.00215827	0.000382251	0.000517704	0	0.00128322	0	0.0110921	0.000658693
WEEK 0	LP	Aposymbiotic	WEEK 0_LP_Aposymbiotic	6-31 LP CP0 MET BIII	met_4_ba7_01_56637.d.xms	0.0129276	0.00151537	0.000663168	0.00170055	1.31481e-05	0	0.00209274	0.00372257	0.00726347	0.000496917	0.000876333	0.00135662	0.00136303	0.00567229	0.000436472	0.00736605	0.000908527	0.000924317	0	0.00122898	0	0.00679933	0.00167185
WEEK 6	LP	Aposymbiotic	WEEK 6_LP_Aposymbiotic	5-31 LP CP2 MET	met_5_ba8_01_56638.d.xms	0.00100434	0.000494673	0.000953428	0.00166997	2.34454e-05	0	0.00192705	0.00397887	0.00277248	0.000367024	0.000346113	0.000480472	0.00121813	0.00132712	0.000241024	0.00315921	0.000641711	0.000504028	0	0.000297535	0	0.0055186	0.000482582
WEEK 0	Ctrl	Symbiotic	WEEK 0_Ctrl_Symbiotic	6-26 CTRL CP0 BIII	met_6_bb1_01_56639.d.xms	0.00072642	0.000204883	0.000478039	0.00162318	0	0	0.00211279	0.00238761	0	0.000144564	0.000231548	0.000544473	0.00077199	0.00161155	0.000227239	0.00146952	0.000246575	0.000510216	0	0.000428975	0	0.00781422	0.000365905
WEEK 6	Ctrl	Aposymbiotic	WEEK 6_Ctrl_Aposymbiotic	3-31 CTRL CP2 MET BIII	met_7_bb2_01_56640.d.xms	0.000818059	0.000432464	0.000831729	0.00165854	0	0	0.0021912	0.00302409	0.00121361	0.000155302	0.00011883	0.000178056	0.000881886	0.00106317	0.000150414	0.00183363	0.000213636	0.000335335	0	0.00014504	0	0.00307542	0.000387411
WEEK 6	Ctrl	Aposymbiotic	WEEK 6_Ctrl_Aposymbiotic	5-31 CTRL CP2 MET	met_8_bb3_01_56641.d.xms	0.000967339	0.00059069	0.00068464	0.00165103	0	0	0.00224919	0.00268257	0.00115569	0.000201433	0.000162701	0.0001661	0.000959385	0.00136389	0.000123001	0.00185859	0.000106904	8.79102e-05	0	0.000252731	0	0.00234179	0.000305269
WEEK 6	LP	Symbiotic	WEEK 6_LP_Symbiotic	5-26 LP CP2 MET BIII	met_9_bb4_01_56642.d.xms	0.0020232	0.000536747	0.000553184	0.00171643	0	0	0.00270825	0.00512039	0.00355433	0.000521354	0.000292538	0.000742349	0.0013784	0.00158953	0.000350514	0.00254876	0.00228284	0.000491649	0	0.000591697	0	0.00819103	0.000616042
WEEK 12	Ctrl	Symbiotic	WEEK 12_Ctrl_Symbiotic	6-26 CTRL CP4 BII MET	met_10_bb5_01_56643.d.xms	0.00158458	0.000622319	0.000749769	0.00170931	0	0	0.00398158	0.00621808	0.00236551	0.000695524	0.000572367	0.0014695	0.00168417	0.00315178	0.000602846	0.00281588	0.000883837	0.000826073	0	0.00161883	0	0.01701	0.00124752
WEEK 12	Ctrl	Symbiotic	WEEK 12_Ctrl_Symbiotic	1-26 CTRL CP4 MET BII	met_11_bb6_01_56648.d.xms	0.00143304	0.000562537	0.00107919	0.00169673	1.12277e-05	0	0.00339914	0.00564557	0.00213552	0.000699503	0.00031634	0.000732628	0.00158187	0.00201654	0.000377801	0.00325782	0.000412503	0.000307071	0	0.00133958	0	0.0103461	0.000409426
WEEK 0	NP	Symbiotic	WEEK 0_NP_Symbiotic	6-26 NP CP0 MET BIII	met_12_bb7_01_56649.d.xms	0.00198621	0.000910255	0.00089067	0.00170047	1.28072e-05	0	0.0041174	0.00652475	0.00226294	0.000417863	0.00029941	0.000604802	0.00175904	0.0022801	0.000563526	0.00436055	0.000268296	0.000600402	0	0.000525819	0	0.0090136	0.000316015
WEEK 0	NP	Aposymbiotic	WEEK 0_NP_Aposymbiotic	3-31 NP CP0 MET BIII	met_13_bb8_01_56650.d.xms	0.000946933	0.000346901	0.000697383	0.00134827	0	0	0.00273255	0.0029623	0	0.000451355	0.000315539	0.000521071	0.000640385	0.00173087	0.00041833	0.00409414	0	0	0	0.000582438	0	0.0047049	0.000797228
WEEK 12	Ctrl	Aposymbiotic	WEEK 12_Ctrl_Aposymbiotic	5-31 CTRL CP4 MET BII	met_14_bc1_01_56651.d.xms	0.00156482	0.000464989	0.00103747	0.00158045	0	0	0.00385564	0.00730804	0	0.000641842	0.000198962	0.00068205	0.00155986	0.00182538	0.000438727	0.0032905	0.000245092	2.23868e-05	0	0.00167609	0	0.0115644	0.00154348
WEEK 0	NP	Aposymbiotic	WEEK 0_NP_Aposymbiotic	3-31 NP CP0 MET BIII	met_15_bc2_01_56652.d.xms	0.00746419	0.000709142	0.00371747	0.00077366	0	0	0.000363174	0.000445927	0.00385425	0.000160676	0.000328791	0.000464495	0.000234479	0.00205594	0.000128065	0.00149814	0.000304193	0.000189471	0	0.000263935	0	0.0010318	0.000682858
WEEK 0	Ctrl	Aposymbiotic	WEEK 0_Ctrl_Aposymbiotic	3-31 CTRL CP0 MET BIII	met_16_bc3_01_56653.d.xms	0.00127327	0.000611131	0.00056582	0.00172445	0	0	0.00271493	0.00349206	0.00250245	0.000421889	0.000264769	0.000522379	0.00106996	0.00156108	0.000370731	0.00229496	0.00111568	0.000670114	0	0.000366582	0	0.00478462	0.000386315
WEEK 6	LP	Symbiotic	WEEK 6_LP_Symbiotic	1-26 LP CP2 MET	met_17_bc4_01_56654.d.xms	0.00101079	0.000335445	0.000734195	0.00168442	0	0	0.00273682	0.00392212	0.00129986	0.000431935	0.000208913	0.000673548	0.00116578	0.00157696	0.000343203	0.00204082	0.00041758	0.000371118	0	0.000716199	0	0.00912518	0.000638441
WEEK 12	LP	Aposymbiotic	WEEK 12_LP_Aposymbiotic	5-31 LP CP4 MET BII	met_18_bc5_01_56655.d.xms	0.00147941	0.00100126	0.00107398	0.00172682	2.99055e-05	0	0.00377702	0.00781701	0.00309748	0.00108095	0.000663636	0.000969496	0.00219925	0.00224978	0.000563475	0.00403256	0.000596754	0.000298484	0	0.00121077	0	0.00765882	0.00111762
WEEK 0	Ctrl	Symbiotic	WEEK 0_Ctrl_Symbiotic	6-26 CTRL CP0 MET BIII	met_19_bc6_01_56656.d.xms	0.00158179	0.000408492	0.000929055	0.00149464	0	0	0.00333307	0.00637233	0	0.000657905	0.000488579	0.000968108	0.00143832	0.0016034	0.000470117	0.00284513	0.000211466	0.000204932	0	0.00140546	0	0.00885303	0.000550173
WEEK 12	LP	Symbiotic	WEEK 12_LP_Symbiotic	1-26 LP CP4 MET BII R1	met_20_bc7_01_56657.d.xms	0.00152288	0.000877568	0.000801419	0.00167633	0	0	0.0035652	0.00575523	0.00267926	0.000352133	0.000278051	0.000907326	0.00144389	0.00354576	0.000489713	0.00365596	0.0004824	0.000504752	0	0.00103144	0	0.0102036	0.000905269
WEEK 13	LP	Symbiotic	WEEK 13_LP_Symbiotic	1-26 LP CP4 MET BII R2	met_21_bc8_01_56661.d.xms	0.00178405	0.00114255	0.000697099	0.00170062	1.65436e-05	0	0.00465476	0.00574144	0.00300262	0.000789396	0.000690346	0.00160788	0.00167609	0.00425252	0.000710335	0.00333911	0.00121945	0.000451937	0	0.00140868	0	0.015197	0.00137687
WEEK 0	NP	Aposymbiotic	WEEK 0_NP_Aposymbiotic	3-31 NP CP0 MET BIII	met_22_bd1_01_56662.d.xms	0.00101182	0.00056893	0.000803347	0.00171364	0	0	0.00336094	0.00377073	0.00169147	0.000531759	0.00041876	0.000602154	0.00108396	0.00186399	0.000364111	0.00248567	0.000248607	0.000106001	0	0.000746667	0	0.00466084	0.000701609
WEEK 6	NP	Symbiotic	WEEK 6_NP_Symbiotic	6-26 NP CP2 MET BIII	met_23_bd2_01_56663.d.xms	0.000983825	0.000241415	0.000526179	0.00166331	0	0	0.0022765	0.00293109	0.00171526	0.000358142	0.000329675	0.000766466	0.000952179	0.00219204	0.000272612	0.00185016	0.000310949	0.00029265	0	0.000456411	0	0.00502663	0.000646521
WEEK 12	LP	Aposymbiotic	WEEK 12_LP_Aposymbiotic	5-31 LP CP4 MET BII	met_24_bd3_01_56664.d.xms	0.00112295	0.000479349	0.000820992	0.00172026	1.57211e-05	0	0.00274662	0.00420037	0.0029027	0.000307925	0.000367441	0.000622462	0.00118061	0.00174173	0.000373677	0.00279982	0.000380406	0.000726929	0	0.000505919	0	0.00591695	0.000756495
WEEK 6	Ctrl	Symbiotic	WEEK 6_Ctrl_Symbiotic	6-26 CTRL CP2 MET BIII	met_25_bd4_01_56665.d.xms	0.00124366	0.000535566	0.000670749	0.0017168	1.60856e-05	0	0.00332612	0.00437394	0.00175525	0.000500816	0.000325863	0.000645439	0.00117625	0.00114753	0.00037879	0.00240703	0.000433091	0.000877682	0	0.000693301	0	0.0089361	0.000645083
WEEK 6	LP	Aposymbiotic	WEEK 6_LP_Aposymbiotic	6-31 LP CP2 MET BII	met_26_bd5_01_56666.d.xms	0.00142034	0.00061958	0.000877493	0.00170994	0	0	0.00321874	0.00651498	0	0.000512313	0.000598092	0.000861084	0.00160841	0.00187673	0.000454934	0.00275277	0.000390956	0.000566636	0	0.000824142	0	0.00648925	0.000897722
WEEK 0	Ctrl	Symbiotic	WEEK 0_Ctrl_Symbiotic	3-26 CTRL CP0 MET	met_27_bd6_01_56667.d.xms	0.00189415	0.000853446	0.00102141	0.00170096	2.2135e-05	0	0.00404887	0.00678313	0.00238378	0.00107022	0.000569703	0.00107626	0.00217673	0.00228029	0.000635126	0.00367477	0.00143377	0.00039238	0	0.00164047	0	0.0129301	0.000984505
WEEK 0	Ctrl	Symbiotic	WEEK 0_Ctrl_Symbiotic	5-26 CTRL MET CP0	met_28_bd7_01_56668.d.xms	0.00186318	0.000813303	0.000909649	0.0017368	5.3423e-05	0	0.00461482	0.00782756	0.00363232	0.000934378	0.000577432	0.00110817	0.00207458	0.00308865	0.000661604	0.00375871	0.000905333	0.00069991	0	0.00200266	0	0.0116602	0.000883709
WEEK 0	LP	Aposymbiotic	WEEK 0_LP_Aposymbiotic	2-31 LP CP0 MET	met_29_bd8_01_56669.d.xms	0.00176499	0.000643008	0.000816179	0.00174558	1.43057e-05	0	0.00397106	0.00702434	0.00306079	0.00088844	0.000308708	0.00101707	0.00203109	0.00255017	0.000623264	0.00292053	0.000668338	0.000604069	0	0.00181659	0	0.0144005	0.00128842
WEEK 0	Ctrl	Aposymbiotic	WEEK 0_Ctrl_Aposymbiotic	3-31 CTRL CP0 MET	met_30_be1_01_56670.d.xms	0.00125303	0.000757196	0.000751013	0.00172642	0	0	0.003394	0.00337046	0.00212478	0.000923018	0.000496688	0.000764271	0.00113037	0.0017621	0.000511707	0.0025713	0.000362612	0.000143997	0	0.0016075	0	0.00929322	0.000523975
WEEK 0	LP	Symbiotic	WEEK 0_LP_Symbiotic	1-26 LP CP0 MET	met_31_be2_01_56674.d.xms	0.00136099	0.000626929	0.000826887	0.00171365	2.29399e-05	0	0.00365675	0.00463524	0.00144274	0.0005645	0.000459998	0.00072564	0.0026992	0.00158808	0.000387547	0.00328001	0.000470598	0.000361407	0	0.00110345	0	0.00930745	0.000425886
WEEK 0	Ctrl	Symbiotic	WEEK 0_Ctrl_Symbiotic	6-26 CTRL CP0 MET	met_32_be3_01_56675.d.xms	0.00123546	0.00044029	0.000504593	0.00167266	0	0	0.00325587	0.0036799	0.00264847	0.000530092	0.00040156	0.00106835	0.00169697	0.00286635	0.000568377	0.00272285	0.000533895	0.000654986	5.05095e-06	0.00144885	0	0.0147077	0.00104996
WEEK 0	NP	Symbiotic	WEEK 0_NP_Symbiotic	3-26 NP CP0 MET	met_33_be4_01_56676.d.xms	0.00190528	0.00110213	0.000773714	0.00176404	0	3.7942e-05	0.00480335	0.00685861	0.00339535	0.000605014	0.000555166	0.000992295	0.003628	0.00241801	0.000594424	0.00378288	0.00111882	0.000549696	0	0.000830846	0	0.0100091	0.000669541
WEEK 0	NP	Aposymbiotic	WEEK 0_NP_Aposymbiotic	3-31 NP CP0 MET	met_34_be5_01_56677.d.xms	0.00134331	0.000991025	0.000832146	0.00174118	3.67203e-05	4.57745e-05	0.00360649	0.00459546	0.00149028	0.00097275	0.000583727	0.000845011	0.00115042	0.00201907	0.00062856	0.00317781	0.000788468	0.000500574	0	0.00147168	0	0.0117384	0.000653778
WEEK 0	NP	Aposymbiotic	WEEK 0_NP_Aposymbiotic	6-31 NP CP0 MET BII	met_35_be6_01_56678.d.xms	0.00114647	0.000480436	0.000809409	0.0017161	2.9826e-05	0	0.00293094	0.00462614	0.00101789	0.000434656	0.000261237	0.00061911	0.00127231	0.00164415	0.000400847	0.00262259	0.000225357	0.000233195	0	0.000602226	0	0.00715979	0.00065842
WEEK 0	NP	Symbiotic	WEEK 0_NP_Symbiotic	6-26 NP CP0 MET	met_36_be7_01_56679.d.xms	0.00097702	0.000526911	0.000671022	0.0017245	3.29803e-05	0	0.00293904	0.00382212	0.00180033	0.000352235	0.000192097	0.000636618	0.00105237	0.0018555	0.000322118	0.00212912	0.000372473	0.000750208	0	0.000787598	0	0.0106328	0.000562793
WEEK 0	LP	Aposymbiotic	WEEK 0_LP_Aposymbiotic	5-31 LP CP0 MET	met_37_be8_01_56680.d.xms	0.00134871	0.000755649	0.00101404	0.00163234	3.44327e-05	0	0.00322369	0.00518432	0.00221583	0.000711247	0.000426233	0.000847309	0.00151655	0.00221992	0.000730805	0.0028894	0.000529874	0.000703169	0	0.00222577	0	0.0171107	0.00105975
WEEK 6	NP	Symbiotic	WEEK 6_NP_Symbiotic	4-26 NP CP2 MET	met_38_ga1_01_56681.d.xms	0.000919397	0.000573421	0.000751892	0.00169238	4.26537e-05	0	0.00295335	0.00430314	0.00160435	0.000376445	0.000356821	0.000681601	0.00201389	0.00200927	0.000274326	0.00216986	0.000441763	0.0005755	0	0.000849968	0	0.0071376	0.000934411
WEEK 0	Ctrl	Symbiotic	WEEK 0_Ctrl_Symbiotic	1-26 CTRL CP0 MET	met_39_ga2_01_56682.d.xms	0.00140888	0.000639016	0.000901287	0.00171248	2.77577e-05	0	0.00366785	0.00596192	0.00250862	0.000585238	0.000437731	0.000906475	0.00161367	0.00226583	0.000503503	0.00277213	0.000555128	0.000384593	0	0.00068888	0	0.0109153	0.000775969
WEEK 0	NP	Symbiotic	WEEK 0_NP_Symbiotic	4-26 NP CP2 MET	met_40_ga3_01_56683.d.xms	0.00113888	0.000707411	0.00106699	0.00161745	0	0	0.00318323	0.00508548	0	0.000525866	0.00047725	0.000616265	0.00140485	0.0018468	0.000285734	0.00264102	0.000266554	6.19973e-05	0	0.000763806	0	0.00694094	0.000357172
WEEK 6	Ctrl	Symbiotic	WEEK 6_Ctrl_Symbiotic	5-26 CTRL CP2 MET	met_41_ga4_01_56688.d.xms	0.00106012	0.000342072	0.000582532	0.00173496	2.18402e-05	0	0.00243838	0.00305462	0.00189788	0.000170592	0.000221239	0.000520447	0.00183303	0.00162972	0.000253529	0.00176845	0.000522905	0.000338512	0	0.000658772	0	0.00752898	0.000394039
WEEK 6	LP	Aposymbiotic	WEEK 6_LP_Aposymbiotic	6-31 LP CP2 MET	met_42_ga5_01_56689.d.xms	0.00108093	0.000616097	0.000936909	0.0017158	1.32171e-05	0	0.00292706	0.00684573	0.00134681	0.000782453	0.000208169	0.000522062	0.00176193	0.00185338	0.000193729	0.00317565	0.000962686	0.000257624	0	0.000912683	0	0.00325304	0.00146378
WEEK 0	Ctrl	Aposymbiotic	WEEK 0_Ctrl_Aposymbiotic	1-31A CTRL BIV MET CP0	met_43_ga6_01_56690.d.xms	0.00133915	0.00054803	0.000799928	0.00163442	0	0	0.00295955	0.00327546	0.00191258	0.000513494	0.000264028	0.000514956	0.00119465	0.00168768	0.000360917	0.0027472	0.000135442	0.000533527	0	0.000348706	0	0.00656564	0.000821359
WEEK 6	LP	Symbiotic	WEEK 6_LP_Symbiotic	6-26 LP CP2 BIV MET	met_44_ga7_01_56691.d.xms	0.00108943	0.000379177	0.000685607	0.00159895	0	0	0.00261586	0.00313308	0	0.000400746	0.000273474	0.000694498	0.000954842	0.00167007	0.00030713	0.00200538	0.00036002	0.000342837	0	0.00117741	0	0.00992141	0.00065432
WEEK 6	Ctrl	Symbiotic	WEEK 6_Ctrl_Symbiotic	6-26 CTRL CP2 BIV MET	met_45_ga8_01_56692.d.xms	0.00126874	0.000708446	0.000426065	0.00174775	4.43344e-05	0	0.00360689	0.00344159	0.00176039	0.000499749	0.000273212	0.00101649	0.00114264	0.00224105	0.000364985	0.0026589	0.000527121	0.00046299	0	0.000619422	0	0.00813887	0.00105123
WEEK 0	Ctrl	Aposymbiotic	WEEK 0_Ctrl_Aposymbiotic	6-31B CTRL BIV MET CP0	met_46_gb1_01_56693.d.xms	0.00119052	0.00082973	0.000694435	0.00169298	2.87111e-05	0	0.00273735	0.00324463	0	0.000478201	0.000440045	0.000756643	0.00202605	0.00187372	0.000480475	0.00243878	0.00029592	0.000349798	0	0.000648579	0	0.00922114	NA
WEEK 6	Ctrl	Aposymbiotic	WEEK 6_Ctrl_Aposymbiotic	1-31A CTRL CP2 BIV MET	met_47_gb2_01_56694.d.xms	0.00140059	0.000476985	0.000439679	0.00174545	2.08858e-05	0	0.00230005	0.00289856	0.00323951	0.000429954	0.00021467	0.000376271	0.000975791	0.00140688	0.000300351	0.00223908	0.00227896	0.00039286	0	0.000145513	0	0.0055342	0.000544077
WEEK 0	Ctrl	Symbiotic	WEEK 0_Ctrl_Symbiotic	6-26 CTRL BIV MET CP0 R1	met_48_gb3_01_56695.d.xms	0.003718	0.000640951	0.00113349	0.00159997	0	0	0.0026398	0.00348571	0.0032115	0.000374518	0.000570134	0.00131072	0.00227495	0.00360717	0.000540397	0.00272237	0.00050779	0.000704396	0	0.000728659	0	0.0100822	0.00118035
WEEK 0	Ctrl	Symbiotic	WEEK 0_Ctrl_Symbiotic	6-26 CTRL BIV MET CP0 R2	met_49_gb4_01_56696.d.xms	0.00158333	0.000833862	0.000586084	0.00166712	4.96664e-05	0.000140294	0.00406909	0.00496691	0.0018673	0.000602772	0.000522225	0.00126346	0.00141461	0.00323095	0.000590912	0.00272886	0.000505967	0.00049122	0	0.0011422	0	0.012501	0.00108641
WEEK 6	NP	Symbiotic	WEEK 6_NP_Symbiotic	1-26 NP CP2 BIV MET	met_50_gb5_01_56697.d.xms	0.00106584	0.000838488	0.0006004	0.00173343	0	0	0.0032563	0.00462169	0.00102052	0.000525663	0.000527258	0.00116644	0.00118514	0.00123544	0.000270733	0.00311588	0.000948568	0.000771621	0	0.00132328	0	0.00636843	0.00125591
WEEK 12	LP	Symbiotic	WEEK 12_LP_Symbiotic	6-26 LP CP4 BIV MET	met_51_gb6_01_56701.d.xms	0.00235103	0.000959971	0.00119185	0.00157124	3.85797e-05	0	0.00292159	0.00353588	0	0.000530413	0.000401339	0.000891838	0.00266391	0.00193217	0.000403736	0.00245507	0.000352138	0.000460087	0	0.00106961	0	0.0107478	0.00101009
WEEK 0	LP	Aposymbiotic	WEEK 0_LP_Aposymbiotic	1-31A LP BIV MET CP0	met_52_gb7_01_56702.d.xms	0.00126845	0.000720265	0.000744873	0.0017269	7.33897e-06	0	0.00292906	0.0036328	0.0027515	0.000263001	0.000260219	0.000560349	0.00210018	0.00186148	0.000316056	0.00249198	0.000327642	0.000559855	0	0.000292155	0	0.00702211	0.000704867
WEEK 12	LP	Symbiotic	WEEK 12_LP_Symbiotic	5-26 LP BIV CP4 MET	met_53_gb8_01_56703.d.xms	0.00129713	0.000608006	0.000978063	0.00172433	2.59858e-05	0	0.00276571	0.00504195	0.00206377	0.000600969	0.000373814	0.000689526	0.00148372	0.00153388	0.000428775	0.00277335	0.000542702	0.000239126	0	0.000933771	0	0.00865996	0.000429026
WEEK 6	LP	Symbiotic	WEEK 6_LP_Symbiotic	6-26 LP CP2 BIV MET	met_54_gc1_01_56704.d.xms	0.000873369	0.000379171	0.000724139	0.00170891	2.79314e-05	0	0.00240867	0.0037779	0.0017349	0.000471861	0.000274816	0.000599111	0.00131028	0.00151929	0.000317555	0.00198146	0.000369053	0.000273412	0	0.00118011	0	0.0128377	0.000659051
WEEK 0	LP	Aposymbiotic	WEEK 0_LP_Aposymbiotic	1-31B LP BIV MET CP0	met_55_gc2_01_56705.d.xms	0.000992282	0.000697864	0.00102065	0.00129982	0	0	0.00284026	0.00521188	0	0.000709921	0.000502164	0.000816164	0.000901395	0.00173017	0.000439309	0.00246609	0	0	0	0.000998597	0	0.00576077	0.000854403
WEEK 0	NP	Symbiotic	WEEK 0_NP_Symbiotic	1-26 NP BIV MET CP0	met_56_gc3_01_56706.d.xms	0.004375	0.00233178	0.000706832	0.00178713	6.31366e-05	0	0.00986901	0.0128569	0.00637627	0.00175299	0.00101725	0.00279896	0.0035925	0.00678821	0.00119731	0.00892925	0.00339198	0.00168895	0	0.00384585	0	0.026575	0.00236693
WEEK 12	Ctrl	Aposymbiotic	WEEK 12_Ctrl_Aposymbiotic	1-31A CTRL CP4 BIV MET R1	met_57_gc4_01_56707.d.xms	0.000804217	0.000641187	0.000717842	0.00169581	2.21277e-05	0	0.00198998	0.0025712	0.00206448	0.000164227	0.000129384	0.000284736	0.000669139	0.000912996	0.00019551	0.00168308	0.000202454	0.000610702	0	0.000304647	0	0.00386506	0.00027484
WEEK 12	Ctrl	Aposymbiotic	WEEK 12_Ctrl_Aposymbiotic	1-31A CTRL CP4 BIV MET R2	met_58_gc5_01_56708.d.xms	0.00085977	0.000746371	0.000863265	0.00166346	0	0	0.00233678	0.00333476	0.00221527	0.000276599	0.000239559	0.000325179	0.00106856	0.0012377	0.000185418	0.00201488	0.000208876	5.15951e-05	0	0.00031225	0	0.00323957	0.000415147
WEEK 12	Ctrl	Aposymbiotic	WEEK 12_Ctrl_Aposymbiotic	1-31A CTRL CP4 BIV MET R3	met_59_gc6_01_56709.d.xms	0.00088087	0.000863044	0.000753356	0.00152624	0	0	0.0024814	0.0030698	0.00217461	0.000298141	0.00020071	0.000326857	0.000973005	0.00135043	0.000253376	0.00205543	8.63299e-05	0	0	0.000187012	0	0.00398668	0.000347234
WEEK 6	Ctrl	Aposymbiotic	WEEK 6_Ctrl_Aposymbiotic	1-31A CTRL CP2 BIV MET	met_60_gc7_01_56710.d.xms	0.00115182	0.000767352	0.000939692	0.00172905	2.8877e-05	0	0.00275282	0.00465118	0.00139179	0.000407673	0.000427522	0.000737034	0.00281223	0.00159706	0.000335205	0.00237543	0.000646262	0.000687228	0	0.000721866	0	0.00638782	0.000635047
WEEK 12	Ctrl	Symbiotic	WEEK 12_Ctrl_Symbiotic	2-26 CTRL CP4 BIV MET R1	met_61_gc8_01_56711.d.xms	0.00144244	0.000892402	0.000751619	0.00172903	0	0	0.00363758	0.00475399	0.00131471	0.000446838	0.000366745	0.000974406	0.00133452	0.00191146	0.00046477	0.00252782	0.000945852	0.000509864	0	0.00126742	0	0.0121633	0.000988244
WEEK 12	Ctrl	Symbiotic	WEEK 12_Ctrl_Symbiotic	2-26 CTRL CP4 BIV MET R2	met_62_gd1_01_56712.d.xms	0.00227969	0.00159805	0.000943946	0.00169667	5.44781e-05	2.11086e-05	0.00389285	0.00316615	0.00143742	0.000920702	0.000632102	0.00124359	0.00209388	0.00142871	0.000318181	0.00877537	0.00119977	0.000414841	0	0.00115904	0	0.00919132	0.00113264
WEEK 12	LP	Symbiotic	WEEK 12_LP_Symbiotic	6-26 LP CP4 BIV MET	met_63_gd2_01_56713.d.xms	0.000994636	0.000331001	0.000839763	0.00171346	2.96797e-05	0	0.00281062	0.00418035	0.00147835	0.000393001	0.000356003	0.000772909	0.00104553	0.00167941	0.000374912	0.00226087	0.000486624	0.000566864	0	0.000593509	0	0.0109617	0.000630915
	Row Labels	Average of L-Alanine	Average of L-Arginine	Average of L-Asparagine	Average of L-Aspartic Acid	Average of L-Cysteine	Average of L-Cystine	Average of L-Glutamic acid	Average of L-Glutamine	Average of L-Glycine	Average of L-Histidine	Average of L-Isoleucine	Average of L-Leucine	Average of L-Lysine	Average of L-Methionine	Average of L-Phenylalanine	Average of L-Proline	Average of L-Serine	Average of L-Threonine	Average of Tryptamine	Average of L-Tryptophane	Average of Tyramine	Average of L-Tyrosine	Average of L-Valine
	WEEK 0_Ctrl_Aposymbiotic	0.00126399	0.000686522	0.000702799	0.00169457	7.17778e-06	0	0.00295146	0.00334565	0.00163495	0.000584151	0.000366383	0.000639562	0.00135526	0.00172115	0.000430958	0.00251306	0.000477413	0.000424359	0	0.000742842	0	0.00746615	0.000577216
	WEEK 0_Ctrl_Symbiotic	0.0017514	0.00060428	0.000807951	0.00165098	1.91228e-05	1.75367e-05	0.00346777	0.00518313	0.0020315	0.000612461	0.000474864	0.00103075	0.00168273	0.00256927	0.000524659	0.00283679	0.00061249	0.000505329	6.31369e-07	0.00118577	0	0.011183	0.000859622
	WEEK 0_LP_Aposymbiotic	0.00366042	0.000866431	0.00085178	0.00162104	1.38451e-05	0	0.00301136	0.00495518	0.00305832	0.000613905	0.000474731	0.000919501	0.00158245	0.00280681	0.000509181	0.00362681	0.000486876	0.000558282	0	0.00131242	0	0.0102187	0.00111586
	WEEK 0_LP_Symbiotic	0.00136099	0.000626929	0.000826887	0.00171365	2.29399e-05	0	0.00365675	0.00463524	0.00144274	0.0005645	0.000459998	0.00072564	0.0026992	0.00158808	0.000387547	0.00328001	0.000470598	0.000361407	0	0.00110345	0	0.00930745	0.000425886
	WEEK 0_NP_Aposymbiotic	0.00238254	0.000619287	0.00137195	0.00145857	1.33093e-05	9.1549e-06	0.00259882	0.00328011	0.00161078	0.000510239	0.000381611	0.000610368	0.000876311	0.0018628	0.000387983	0.00277567	0.000313325	0.000205848	0	0.00073339	0	0.00585914	0.000698778
	WEEK 0_NP_Symbiotic	0.00207648	0.0011157	0.000821846	0.00171872	2.17848e-05	7.58839e-06	0.00498241	0.00702956	0.00276698	0.000730794	0.000508236	0.00112979	0.00228735	0.00303772	0.000592623	0.00436856	0.00108362	0.000730251	0	0.00135078	0	0.0126343	0.00085449
	WEEK 12_Ctrl_Aposymbiotic	0.00102742	0.000678898	0.000842983	0.00161649	5.53193e-06	0	0.00266595	0.00407095	0.00161359	0.000345202	0.000192154	0.000404705	0.00106764	0.00133163	0.000268258	0.00226097	0.000185688	0.000171171	0	0.000620001	0	0.00566392	0.000645175
	WEEK 12_Ctrl_Symbiotic	0.00168494	0.000918828	0.000881132	0.00170794	1.64265e-05	5.27714e-06	0.00372779	0.00494595	0.00181329	0.000690642	0.000471888	0.00110503	0.00167361	0.00212712	0.000440899	0.00434422	0.000860492	0.000514462	0	0.00134622	0	0.0121777	0.000944458
	WEEK 12_LP_Aposymbiotic	0.00130118	0.000740304	0.000947486	0.00172354	2.28133e-05	0	0.00326182	0.00600869	0.00300009	0.000694436	0.000515539	0.000795979	0.00168993	0.00199576	0.000468576	0.00341619	0.00048858	0.000512706	0	0.000858344	0	0.00678789	0.000937055
	WEEK 12_LP_Symbiotic	0.00154142	0.000694137	0.000952774	0.00167134	2.35613e-05	0	0.00301578	0.00462835	0.00155535	0.000469129	0.000352302	0.0008154	0.00165926	0.0021728	0.000424284	0.00278631	0.000465966	0.000442707	0	0.000907082	0	0.0101433	0.000743824
	WEEK 13_LP_Symbiotic	0.00178405	0.00114255	0.000697099	0.00170062	1.65436e-05	0	0.00465476	0.00574144	0.00300262	0.000789396	0.000690346	0.00160788	0.00167609	0.00425252	0.000710335	0.00333911	0.00121945	0.000451937	0	0.00140868	0	0.015197	0.00137687
	WEEK 6_Ctrl_Aposymbiotic	0.00108445	0.000566873	0.000723935	0.00169602	1.24407e-05	0	0.00237332	0.0033141	0.00175015	0.000298591	0.000230931	0.000364365	0.00140732	0.00135775	0.000227243	0.00207668	0.00081144	0.000375833	0	0.000316288	0	0.00433481	0.000467951
	WEEK 6_Ctrl_Symbiotic	0.00114065	0.000463452	0.000656157	0.00169295	1.61433e-05	0	0.00288295	0.00396199	0.0020556	0.000383379	0.000302074	0.000703101	0.00142724	0.00151729	0.000314882	0.0020997	0.000482314	0.000451531	0	0.000753053	0	0.00794577	0.000613231
	WEEK 6_LP_Aposymbiotic	0.00116854	0.000576783	0.00092261	0.00169857	1.22209e-05	0	0.00269095	0.00577986	0.0013731	0.00055393	0.000384125	0.000621206	0.00152949	0.00168574	0.000296562	0.00302921	0.000665118	0.000442763	0	0.00067812	0	0.00508696	0.000948029
	WEEK 6_LP_Symbiotic	0.0012492	0.000407635	0.000674281	0.00167718	6.98286e-06	0	0.0026174	0.00398838	0.00164727	0.000456474	0.000262435	0.000677377	0.00120233	0.00158896	0.000329601	0.0021441	0.000857374	0.000369754	0	0.000916352	0	0.0100188	0.000641963
	WEEK 6_NP_Symbiotic	0.000989687	0.000551108	0.000626157	0.00169637	1.42179e-05	0	0.00282872	0.00395197	0.00144671	0.000420083	0.000404585	0.000871503	0.00138374	0.00181225	0.000272557	0.00237863	0.000567093	0.00054659	0	0.000876552	0	0.00617755	0.000945613
	Grand Total	0.00166794	0.000683609	0.00083818	0.00166123	1.50389e-05	3.89077e-06	0.00315561	0.00460832	0.00197983	0.000532003	0.000388669	0.000796703	0.00151924	0.00205902	0.000408934	0.00290991	0.000606512	0.000447995	8.01738e-08	0.000940879	0	0.00875859	0.000786531

## Sheet: result_calculation_nmol per ant
	IS batch	MBBD1153			L-Alanine		L-Arginine		L-Asparagine		L-Aspartic Acid		L-Cysteine		L-Cystine		L-Glutamic acid		L-Glutamine		L-Glycine		L-Histidine		L-Isoleucine		L-Leucine		L-Lysine		L-Methionine		L-Phenylalanine		L-Proline		L-Serine		L-Threonine		Tryptamine		L-Tryptophane		Tyramine		L-Tyrosine		L-Valine
	Extraction volume [µl]	500	Std	fmol/ng labAA	3547	lab-Ala (BA)	579	lab-Arg (BC)	1825	lab-Asx (BE)	1825	lab-Asx (BE)	328	lab-Tyr (CC)	328	lab-Tyr (CC)	1597	lab-Glx (BG)	1597	lab-Glx (BG)	8200	lab-Gly (BI)	124	lab-His (BK)	663	lab-Ile (BM)	1324	lab-Leu (BO)	223	lab-Lys (BQ)	1398	lab-Met (BS)	454	lab-Phe (BU)	1016	lab-Pro (BW)	1222	lab-Ser (BY)	1145	lab-Thr (CA)	328	lab-Tyr (CC)	454	lab-Phe (BU)	328	lab-Tyr (CC)	328	lab-Tyr (CC)	1299
	Dilution factor	2		nmol/uL	0.0017735		0.0002895		0.0009125		0.0009125		0.000164		0.000164		0.0007985		0.0007985		0.0041		6.2e-05		0.0003315		0.000662		0.0001115		0.000699		0.000227		0.000508		0.000611		0.0005725		0.000164		0.000227		0.000164		0.000164		0.0006495
	final ng labAA/µl	0.5	Capsule	RF	1		1		1		1		5.5		5.5		1		1		1		1		1		1		1		1		1		1		1		1		0.14		3.3		0.91		1		1
				Leaf	1		1		1		1		5.5		5.5		1		1		1		1		1		1		1		1		1		1		1		1		0.13		3.3		0.93		1		1
				Capsule	1		1		1		1		5.5		5.5		1		1		1		1		1		1		1		1		1		1		1		1		0.14		3.3		0.91		1		1
Tube-label	Plate_position	data_file	number/weight of ants	Seed	1		1		1		1		5.5		5.5		1		1		1		1		1		1		1		1		1		1		1		1		0.19		4.2		0.87		1		1
1-26 CTRL CP2 MET		met_1_ba4_01_56634.d.xms	1	tissue concentration nmol/g FW or /ant	0.30665		0.107273		0.275092		0.807411		0		0		0.702575		0.893009		0.642222		0.12921		0.0768436		0.179964		0.271168		0.440319		0.0688129		0.597376		0.182235		0.0497434		0		0.197518		0		2.53223		0.203919
6-26 CTRL CP2 MET		met_2_ba5_01_56635.d.xms	1		0.745372		0.262821		0.451761		0.83993		0		0		1.6519		3.11975		1.64324		0.283652		0.254879		0.402312		0.854045		0.748872		0.173851		1.20541		0.332024		0.206404		0		0.434283		0		3.45707		0.261253
6-26 CTRL CP2 MET BIII		met_3_ba6_01_56636.d.xms	1		0.583659		0.227222		0.401946		0.831762		0.00729977		0		1.60867		2.43813		1.17458		0.151698		0.164343		0.435838		1.08055		0.853538		0.203332		1.07913		0.191126		0.258852		0		0.641612		0		5.54604		0.329347
6-31 LP CP0 MET BIII		met_4_ba7_01_56637.d.xms	1		6.46382		0.757684		0.331584		0.850276		0.00657407		0		1.04637		1.86129		3.63174		0.248458		0.438166		0.678308		0.681515		2.83615		0.218236		3.68302		0.454264		0.462159		0		0.61449		0		3.39966		0.835925
5-31 LP CP2 MET		met_5_ba8_01_56638.d.xms	1		0.502172		0.247337		0.476714		0.834986		0.0117227		0		0.963523		1.98944		1.38624		0.183512		0.173056		0.240236		0.609065		0.663559		0.120512		1.57961		0.320855		0.252014		0		0.148767		0		2.7593		0.241291
6-26 CTRL CP0 BIII		met_6_bb1_01_56639.d.xms	1		0.36321		0.102442		0.239019		0.81159		0		0		1.05639		1.19381		0		0.0722822		0.115774		0.272236		0.385995		0.805775		0.11362		0.734762		0.123288		0.255108		0		0.214488		0		3.90711		0.182952
3-31 CTRL CP2 MET BIII		met_7_bb2_01_56640.d.xms	1		0.40903		0.216232		0.415865		0.829268		0		0		1.0956		1.51204		0.606807		0.077651		0.0594152		0.0890278		0.440943		0.531586		0.0752068		0.916817		0.106818		0.167668		0		0.0725202		0		1.53771		0.193706
5-31 CTRL CP2 MET		met_8_bb3_01_56641.d.xms	1		0.48367		0.295345		0.34232		0.825513		0		0		1.1246		1.34129		0.577846		0.100717		0.0813504		0.0830501		0.479693		0.681945		0.0615003		0.929297		0.0534519		0.0439551		0		0.126365		0		1.17089		0.152635
5-26 LP CP2 MET BIII		met_9_bb4_01_56642.d.xms	1		1.0116		0.268373		0.276592		0.858213		0		0		1.35412		2.5602		1.77716		0.260677		0.146269		0.371175		0.689198		0.794765		0.175257		1.27438		1.14142		0.245825		0		0.295848		0		4.09551		0.308021
6-26 CTRL CP4 BII MET		met_10_bb5_01_56643.d.xms	1		0.792288		0.311159		0.374885		0.854657		0		0		1.99079		3.10904		1.18275		0.347762		0.286184		0.734748		0.842086		1.57589		0.301423		1.40794		0.441919		0.413037		0		0.809415		0		8.50502		0.623759
1-26 CTRL CP4 MET BII		met_11_bb6_01_56648.d.xms	1		0.716521		0.281268		0.539597		0.848367		0.00561387		0		1.69957		2.82279		1.06776		0.349752		0.15817		0.366314		0.790934		1.00827		0.1889		1.62891		0.206252		0.153535		0		0.669788		0		5.17304		0.204713
6-26 NP CP0 MET BIII		met_12_bb7_01_56649.d.xms	1		0.993103		0.455128		0.445335		0.850234		0.00640359		0		2.0587		3.26238		1.13147		0.208932		0.149705		0.302401		0.87952		1.14005		0.281763		2.18028		0.134148		0.300201		0		0.262909		0		4.5068		0.158007
3-31 NP CP0 MET BIII		met_13_bb8_01_56650.d.xms	1		0.473466		0.173451		0.348691		0.674137		0		0		1.36628		1.48115		0		0.225677		0.157769		0.260536		0.320193		0.865436		0.209165		2.04707		0		0		0		0.291219		0		2.35245		0.398614
5-31 CTRL CP4 MET BII		met_14_bc1_01_56651.d.xms	1		0.782408		0.232495		0.518735		0.790226		0		0		1.92782		3.65402		0		0.320921		0.0994811		0.341025		0.77993		0.912689		0.219363		1.64525		0.122546		0.0111934		0		0.838047		0		5.78218		0.77174
3-31 NP CP0 MET BIII		met_15_bc2_01_56652.d.xms	1		3.7321		0.354571		1.85873		0.38683		0		0		0.181587		0.222963		1.92712		0.0803379		0.164395		0.232248		0.117239		1.02797		0.0640323		0.749069		0.152097		0.0947353		0		0.131968		0		0.515899		0.341429
3-31 CTRL CP0 MET BIII		met_16_bc3_01_56653.d.xms	1		0.636636		0.305565		0.28291		0.862226		0		0		1.35746		1.74603		1.25123		0.210945		0.132385		0.261189		0.53498		0.780541		0.185366		1.14748		0.557838		0.335057		0		0.183291		0		2.39231		0.193157
1-26 LP CP2 MET		met_17_bc4_01_56654.d.xms	1		0.505397		0.167722		0.367097		0.84221		0		0		1.36841		1.96106		0.649929		0.215967		0.104457		0.336774		0.582891		0.788481		0.171602		1.02041		0.20879		0.185559		0		0.358099		0		4.56259		0.319221
5-31 LP CP4 MET BII		met_18_bc5_01_56655.d.xms	1		0.739704		0.50063		0.53699		0.863408		0.0149528		0		1.88851		3.90851		1.54874		0.540473		0.331818		0.484748		1.09962		1.12489		0.281737		2.01628		0.298377		0.149242		0		0.605384		0		3.82941		0.558808
6-26 CTRL CP0 MET BIII		met_19_bc6_01_56656.d.xms	1		0.790895		0.204246		0.464527		0.747322		0		0		1.66654		3.18616		0		0.328953		0.244289		0.484054		0.719159		0.801702		0.235059		1.42256		0.105733		0.102466		0		0.70273		0		4.42651		0.275086
1-26 LP CP4 MET BII R1		met_20_bc7_01_56657.d.xms	1		0.761442		0.438784		0.40071		0.838163		0		0		1.7826		2.87762		1.33963		0.176066		0.139025		0.453663		0.721946		1.77288		0.244857		1.82798		0.2412		0.252376		0		0.51572		0		5.10179		0.452635
1-26 LP CP4 MET BII R2		met_21_bc8_01_56661.d.xms	1		0.892026		0.571277		0.348549		0.850311		0.00827181		0		2.32738		2.87072		1.50131		0.394698		0.345173		0.803939		0.838044		2.12626		0.355167		1.66956		0.609724		0.225968		0		0.704342		0		7.59848		0.688433
3-31 NP CP0 MET BIII		met_22_bd1_01_56662.d.xms	1		0.505908		0.284465		0.401673		0.856818		0		0		1.68047		1.88536		0.845735		0.265879		0.20938		0.301077		0.54198		0.931994		0.182055		1.24283		0.124304		0.0530005		0		0.373334		0		2.33042		0.350804
6-26 NP CP2 MET BIII		met_23_bd2_01_56663.d.xms	1		0.491913		0.120707		0.263089		0.831655		0		0		1.13825		1.46554		0.857628		0.179071		0.164837		0.383233		0.476089		1.09602		0.136306		0.925078		0.155475		0.146325		0		0.228205		0		2.51331		0.32326
5-31 LP CP4 MET BII		met_24_bd3_01_56664.d.xms	1		0.561476		0.239675		0.410496		0.860132		0.00786057		0		1.37331		2.10019		1.45135		0.153963		0.183721		0.311231		0.590305		0.870865		0.186839		1.39991		0.190203		0.363464		0		0.25296		0		2.95848		0.378247
6-26 CTRL CP2 MET BIII		met_25_bd4_01_56665.d.xms	1		0.621832		0.267783		0.335375		0.858398		0.00804281		0		1.66306		2.18697		0.877623		0.250408		0.162931		0.32272		0.588127		0.573763		0.189395		1.20351		0.216545		0.438841		0		0.346651		0		4.46805		0.322542
6-31 LP CP2 MET BII		met_26_bd5_01_56666.d.xms	1		0.710169		0.30979		0.438747		0.854971		0		0		1.60937		3.25749		0		0.256157		0.299046		0.430542		0.804203		0.938367		0.227467		1.37638		0.195478		0.283318		0		0.412071		0		3.24462		0.448861
3-26 CTRL CP0 MET		met_27_bd6_01_56667.d.xms	1		0.947074		0.426723		0.510707		0.850479		0.0110675		0		2.02443		3.39156		1.19189		0.535112		0.284852		0.538129		1.08836		1.14015		0.317563		1.83739		0.716883		0.19619		0		0.820235		0		6.46503		0.492252
5-26 CTRL MET CP0		met_28_bd7_01_56668.d.xms	1		0.931589		0.406652		0.454825		0.8684		0.0267115		0		2.30741		3.91378		1.81616		0.467189		0.288716		0.554085		1.03729		1.54432		0.330802		1.87936		0.452667		0.349955		0		1.00133		0		5.8301		0.441854
2-31 LP CP0 MET		met_29_bd8_01_56669.d.xms	1		0.882494		0.321504		0.408089		0.87279		0.00715287		0		1.98553		3.51217		1.53039		0.44422		0.154354		0.508533		1.01554		1.27508		0.311632		1.46026		0.334169		0.302035		0		0.908296		0		7.20027		0.644208
3-31 CTRL CP0 MET		met_30_be1_01_56670.d.xms	1		0.626514		0.378598		0.375506		0.863209		0		0		1.697		1.68523		1.06239		0.461509		0.248344		0.382135		0.565186		0.881052		0.255853		1.28565		0.181306		0.0719986		0		0.80375		0		4.64661		0.261988
1-26 LP CP0 MET		met_31_be2_01_56674.d.xms	1		0.680495		0.313465		0.413443		0.856827		0.01147		0		1.82837		2.31762		0.721368		0.28225		0.229999		0.36282		1.3496		0.794039		0.193774		1.64		0.235299		0.180704		0		0.551727		0		4.65372		0.212943
6-26 CTRL CP0 MET		met_32_be3_01_56675.d.xms	1		0.617728		0.220145		0.252296		0.836328		0		0		1.62794		1.83995		1.32424		0.265046		0.20078		0.534175		0.848485		1.43317		0.284189		1.36142		0.266947		0.327493		0.00252548		0.724423		0		7.35385		0.52498
3-26 NP CP0 MET		met_33_be4_01_56676.d.xms	1		0.952638		0.551065		0.386857		0.882019		0		0.018971		2.40168		3.4293		1.69768		0.302507		0.277583		0.496148		1.814		1.209		0.297212		1.89144		0.559411		0.274848		0		0.415423		0		5.00455		0.334771
3-31 NP CP0 MET		met_34_be5_01_56677.d.xms	1		0.671654		0.495512		0.416073		0.870591		0.0183602		0.0228873		1.80324		2.29773		0.745141		0.486375		0.291864		0.422506		0.575211		1.00953		0.31428		1.58891		0.394234		0.250287		0		0.735841		0		5.86919		0.326889
6-31 NP CP0 MET BII		met_35_be6_01_56678.d.xms	1		0.573235		0.240218		0.404704		0.858052		0.014913		0		1.46547		2.31307		0.508944		0.217328		0.130619		0.309555		0.636155		0.822076		0.200424		1.3113		0.112678		0.116597		0		0.301113		0		3.57989		0.32921
6-26 NP CP0 MET		met_36_be7_01_56679.d.xms	1		0.48851		0.263455		0.335511		0.86225		0.0164902		0		1.46952		1.91106		0.900164		0.176118		0.0960486		0.318309		0.526186		0.927752		0.161059		1.06456		0.186237		0.375104		0		0.393799		0		5.31642		0.281396
5-31 LP CP0 MET		met_37_be8_01_56680.d.xms	1		0.674357		0.377824		0.507018		0.816169		0.0172164		0		1.61184		2.59216		1.10792		0.355623		0.213117		0.423655		0.758276		1.10996		0.365403		1.4447		0.264937		0.351585		0		1.11288		0		8.55535		0.529876
4-26 NP CP2 MET		met_38_ga1_01_56681.d.xms	1		0.459699		0.286711		0.375946		0.846192		0.0213269		0		1.47668		2.15157		0.802174		0.188223		0.178411		0.340801		1.00694		1.00463		0.137163		1.08493		0.220881		0.28775		0		0.424984		0		3.5688		0.467205
1-26 CTRL CP0 MET		met_39_ga2_01_56682.d.xms	1		0.704438		0.319508		0.450643		0.85624		0.0138788		0		1.83392		2.98096		1.25431		0.292619		0.218866		0.453238		0.806833		1.13292		0.251752		1.38606		0.277564		0.192296		0		0.34444		0		5.45764		0.387984
4-26 NP CP2 MET		met_40_ga3_01_56683.d.xms	1		0.569439		0.353705		0.533497		0.808723		0		0		1.59162		2.54274		0		0.262933		0.238625		0.308133		0.702424		0.9234		0.142867		1.32051		0.133277		0.0309986		0		0.381903		0		3.47047		0.178586
5-26 CTRL CP2 MET		met_41_ga4_01_56688.d.xms	1		0.530058		0.171036		0.291266		0.867479		0.0109201		0		1.21919		1.52731		0.94894		0.0852958		0.110619		0.260223		0.916515		0.81486		0.126765		0.884226		0.261452		0.169256		0		0.329386		0		3.76449		0.19702
6-31 LP CP2 MET		met_42_ga5_01_56689.d.xms	1		0.540466		0.308048		0.468454		0.857899		0.00660857		0		1.46353		3.42287		0.673405		0.391226		0.104084		0.261031		0.880963		0.926688		0.0968643		1.58782		0.481343		0.128812		0		0.456341		0		1.62652		0.731891
1-31A CTRL BIV MET CP0		met_43_ga6_01_56690.d.xms	1		0.669574		0.274015		0.399964		0.817209		0		0		1.47977		1.63773		0.956289		0.256747		0.132014		0.257478		0.597325		0.843839		0.180459		1.3736		0.067721		0.266764		0		0.174353		0		3.28282		0.41068
6-26 LP CP2 BIV MET		met_44_ga7_01_56691.d.xms	1		0.544713		0.189589		0.342803		0.799476		0		0		1.30793		1.56654		0		0.200373		0.136737		0.347249		0.477421		0.835035		0.153565		1.00269		0.18001		0.171418		0		0.588703		0		4.9607		0.32716
6-26 CTRL CP2 BIV MET		met_45_ga8_01_56692.d.xms	1		0.634368		0.354223		0.213033		0.873876		0.0221672		0		1.80345		1.72079		0.880195		0.249874		0.136606		0.508246		0.571322		1.12053		0.182493		1.32945		0.263561		0.231495		0		0.309711		0		4.06943		0.525613
6-31B CTRL BIV MET CP0		met_46_gb1_01_56693.d.xms	1		0.595261		0.414865		0.347218		0.846492		0.0143556		0		1.36868		1.62232		0		0.239101		0.220022		0.378322		1.01302		0.936862		0.240238		1.21939		0.14796		0.174899		0		0.32429		0		4.61057		NA
1-31A CTRL CP2 BIV MET		met_47_gb2_01_56694.d.xms	1		0.700297		0.238493		0.219839		0.872723		0.0104429		0		1.15002		1.44928		1.61975		0.214977		0.107335		0.188136		0.487896		0.703439		0.150175		1.11954		1.13948		0.19643		0		0.0727567		0		2.7671		0.272039
6-26 CTRL BIV MET CP0 R1		met_48_gb3_01_56695.d.xms	1		1.859		0.320475		0.566745		0.799984		0		0		1.3199		1.74285		1.60575		0.187259		0.285067		0.655359		1.13748		1.80358		0.270199		1.36118		0.253895		0.352198		0		0.36433		0		5.04112		0.590177
6-26 CTRL BIV MET CP0 R2		met_49_gb4_01_56696.d.xms	1		0.791664		0.416931		0.293042		0.83356		0.0248332		0.0701468		2.03455		2.48346		0.933652		0.301386		0.261113		0.63173		0.707304		1.61548		0.295456		1.36443		0.252983		0.24561		0		0.571098		0		6.25052		0.543203
1-26 NP CP2 BIV MET		met_50_gb5_01_56697.d.xms	1		0.532919		0.419244		0.3002		0.866713		0		0		1.62815		2.31084		0.510258		0.262832		0.263629		0.583222		0.592571		0.61772		0.135366		1.55794		0.474284		0.38581		0		0.661639		0		3.18421		0.627953
6-26 LP CP4 BIV MET		met_51_gb6_01_56701.d.xms	1		1.17552		0.479985		0.595924		0.785621		0.0192899		0		1.46079		1.76794		0		0.265207		0.20067		0.445919		1.33195		0.966087		0.201868		1.22753		0.176069		0.230044		0		0.534805		0		5.3739		0.505043
1-31A LP BIV MET CP0		met_52_gb7_01_56702.d.xms	1		0.634227		0.360133		0.372437		0.863452		0.00366948		0		1.46453		1.8164		1.37575		0.131501		0.130109		0.280175		1.05009		0.930741		0.158028		1.24599		0.163821		0.279928		0		0.146077		0		3.51105		0.352433
5-26 LP BIV CP4 MET		met_53_gb8_01_56703.d.xms	1		0.648567		0.304003		0.489032		0.862164		0.0129929		0		1.38286		2.52098		1.03188		0.300485		0.186907		0.344763		0.741862		0.766938		0.214387		1.38667		0.271351		0.119563		0		0.466886		0		4.32998		0.214513
6-26 LP CP2 BIV MET		met_54_gc1_01_56704.d.xms	1		0.436685		0.189585		0.362069		0.854457		0.0139657		0		1.20434		1.88895		0.867448		0.23593		0.137408		0.299556		0.655141		0.759645		0.158778		0.99073		0.184527		0.136706		0		0.590053		0		6.41886		0.329525
1-31B LP BIV MET CP0		met_55_gc2_01_56705.d.xms	1		0.496141		0.348932		0.510323		0.649908		0		0		1.42013		2.60594		0		0.35496		0.251082		0.408082		0.450698		0.865087		0.219654		1.23305		0		0		0		0.499299		0		2.88039		0.427202
1-26 NP BIV MET CP0		met_56_gc3_01_56706.d.xms	1		2.1875		1.16589		0.353416		0.893566		0.0315683		0		4.93451		6.42843		3.18814		0.876495		0.508627		1.39948		1.79625		3.3941		0.598657		4.46462		1.69599		0.844477		0		1.92292		0		13.2875		1.18346
1-31A CTRL CP4 BIV MET R1		met_57_gc4_01_56707.d.xms	1		0.402108		0.320593		0.358921		0.847904		0.0110639		0		0.994989		1.2856		1.03224		0.0821135		0.0646919		0.142368		0.334569		0.456498		0.0977552		0.84154		0.101227		0.305351		0		0.152324		0		1.93253		0.13742
1-31A CTRL CP4 BIV MET R2		met_58_gc5_01_56708.d.xms	1		0.429885		0.373185		0.431633		0.831728		0		0		1.16839		1.66738		1.10764		0.138299		0.11978		0.162589		0.534279		0.61885		0.0927088		1.00744		0.104438		0.0257975		0		0.156125		0		1.61979		0.207573
1-31A CTRL CP4 BIV MET R3		met_59_gc6_01_56709.d.xms	1		0.440435		0.431522		0.376678		0.763121		0		0		1.2407		1.5349		1.0873		0.14907		0.100355		0.163429		0.486503		0.675217		0.126688		1.02772		0.0431649		0		0		0.093506		0		1.99334		0.173617
1-31A CTRL CP2 BIV MET		met_60_gc7_01_56710.d.xms	1		0.575911		0.383676		0.469846		0.864526		0.0144385		0		1.37641		2.32559		0.695896		0.203837		0.213761		0.368517		1.40612		0.798532		0.167603		1.18772		0.323131		0.343614		0		0.360933		0		3.19391		0.317524
2-26 CTRL CP4 BIV MET R1		met_61_gc8_01_56711.d.xms	1		0.721219		0.446201		0.37581		0.864514		0		0		1.81879		2.377		0.657357		0.223419		0.183373		0.487203		0.667261		0.955728		0.232385		1.26391		0.472926		0.254932		0		0.633709		0		6.08166		0.494122
2-26 CTRL CP4 BIV MET R2		met_62_gd1_01_56712.d.xms	1		1.13984		0.799027		0.471973		0.848334		0.0272391		0.0105543		1.94642		1.58308		0.718711		0.460351		0.316051		0.621795		1.04694		0.714353		0.15909		4.38769		0.599887		0.20742		0		0.57952		0		4.59566		0.566321
6-26 LP CP4 BIV MET		met_63_gd2_01_56713.d.xms	1		0.497318		0.1655		0.419881		0.856729		0.0148399		0		1.40531		2.09018		0.739174		0.196501		0.178001		0.386454		0.522764		0.839704		0.187456		1.13044		0.243312		0.283432		0		0.296755		0		5.48085		0.315457
					NA		NA		NA		NA		NA		NA		NA		NA		NA		NA		NA		NA		NA		NA		NA		NA		NA		NA		NA		NA		NA		NA		NA
					NA		NA		NA		NA		NA		NA		NA		NA		NA		NA		NA		NA		NA		NA		NA		NA		NA		NA		NA		NA		NA		NA		NA
					NA		NA		NA		NA		NA		NA		NA		NA		NA		NA		NA		NA		NA		NA		NA		NA		NA		NA		NA		NA		NA		NA		NA
					NA		NA		NA		NA		NA		NA		NA		NA		NA		NA		NA		NA		NA		NA		NA		NA		NA		NA		NA		NA		NA		NA		NA
					NA		NA		NA		NA		NA		NA		NA		NA		NA		NA		NA		NA		NA		NA		NA		NA		NA		NA		NA		NA		NA		NA		NA
					NA		NA		NA		NA		NA		NA		NA		NA		NA		NA		NA		NA		NA		NA		NA		NA		NA		NA		NA		NA		NA		NA		NA
					NA		NA		NA		NA		NA		NA		NA		NA		NA		NA		NA		NA		NA		NA		NA		NA		NA		NA		NA		NA		NA		NA		NA
					NA		NA		NA		NA		NA		NA		NA		NA		NA		NA		NA		NA		NA		NA		NA		NA		NA		NA		NA		NA		NA		NA		NA
					NA		NA		NA		NA		NA		NA		NA		NA		NA		NA		NA		NA		NA		NA		NA		NA		NA		NA		NA		NA		NA		NA		NA
					NA		NA		NA		NA		NA		NA		NA		NA		NA		NA		NA		NA		NA		NA		NA		NA		NA		NA		NA		NA		NA		NA		NA
					NA		NA		NA		NA		NA		NA		NA		NA		NA		NA		NA		NA		NA		NA		NA		NA		NA		NA		NA		NA		NA		NA		NA
					NA		NA		NA		NA		NA		NA		NA		NA		NA		NA		NA		NA		NA		NA		NA		NA		NA		NA		NA		NA		NA		NA		NA
					NA		NA		NA		NA		NA		NA		NA		NA		NA		NA		NA		NA		NA		NA		NA		NA		NA		NA		NA		NA		NA		NA		NA
					NA		NA		NA		NA		NA		NA		NA		NA		NA		NA		NA		NA		NA		NA		NA		NA		NA		NA		NA		NA		NA		NA		NA
					NA		NA		NA		NA		NA		NA		NA		NA		NA		NA		NA		NA		NA		NA		NA		NA		NA		NA		NA		NA		NA		NA		NA
					NA		NA		NA		NA		NA		NA		NA		NA		NA		NA		NA		NA		NA		NA		NA		NA		NA		NA		NA		NA		NA		NA		NA
					NA		NA		NA		NA		NA		NA		NA		NA		NA		NA		NA		NA		NA		NA		NA		NA		NA		NA		NA		NA		NA		NA		NA
					NA		NA		NA		NA		NA		NA		NA		NA		NA		NA		NA		NA		NA		NA		NA		NA		NA		NA		NA		NA		NA		NA		NA
					NA		NA		NA		NA		NA		NA		NA		NA		NA		NA		NA		NA		NA		NA		NA		NA		NA		NA		NA		NA		NA		NA		NA
					NA		NA		NA		NA		NA		NA		NA		NA		NA		NA		NA		NA		NA		NA		NA		NA		NA		NA		NA		NA		NA		NA		NA
					NA		NA		NA		NA		NA		NA		NA		NA		NA		NA		NA		NA		NA		NA		NA		NA		NA		NA		NA		NA		NA		NA		NA
					NA		NA		NA		NA		NA		NA		NA		NA		NA		NA		NA		NA		NA		NA		NA		NA		NA		NA		NA		NA		NA		NA		NA
					NA		NA		NA		NA		NA		NA		NA		NA		NA		NA		NA		NA		NA		NA		NA		NA		NA		NA		NA		NA		NA		NA		NA
					NA		NA		NA		NA		NA		NA		NA		NA		NA		NA		NA		NA		NA		NA		NA		NA		NA		NA		NA		NA		NA		NA		NA
					NA		NA		NA		NA		NA		NA		NA		NA		NA		NA		NA		NA		NA		NA		NA		NA		NA		NA		NA		NA		NA		NA		NA
					NA		NA		NA		NA		NA		NA		NA		NA		NA		NA		NA		NA		NA		NA		NA		NA		NA		NA		NA		NA		NA		NA		NA
					NA		NA		NA		NA		NA		NA		NA		NA		NA		NA		NA		NA		NA		NA		NA		NA		NA		NA		NA		NA		NA		NA		NA
					NA		NA		NA		NA		NA		NA		NA		NA		NA		NA		NA		NA		NA		NA		NA		NA		NA		NA		NA		NA		NA		NA		NA
					NA		NA		NA		NA		NA		NA		NA		NA		NA		NA		NA		NA		NA		NA		NA		NA		NA		NA		NA		NA		NA		NA		NA
					NA		NA		NA		NA		NA		NA		NA		NA		NA		NA		NA		NA		NA		NA		NA		NA		NA		NA		NA		NA		NA		NA		NA
					NA		NA		NA		NA		NA		NA		NA		NA		NA		NA		NA		NA		NA		NA		NA		NA		NA		NA		NA		NA		NA		NA		NA
					NA		NA		NA		NA		NA		NA		NA		NA		NA		NA		NA		NA		NA		NA		NA		NA		NA		NA		NA		NA		NA		NA		NA
					NA		NA		NA		NA		NA		NA		NA		NA		NA		NA		NA		NA		NA		NA		NA		NA		NA		NA		NA		NA		NA		NA		NA
					NA		NA		NA		NA		NA		NA		NA		NA		NA		NA		NA		NA		NA		NA		NA		NA		NA		NA		NA		NA		NA		NA		NA
					NA		NA		NA		NA		NA		NA		NA		NA		NA		NA		NA		NA		NA		NA		NA		NA		NA		NA		NA		NA		NA		NA		NA
					NA		NA		NA		NA		NA		NA		NA		NA		NA		NA		NA		NA		NA		NA		NA		NA		NA		NA		NA		NA		NA		NA		NA
					NA		NA		NA		NA		NA		NA		NA		NA		NA		NA		NA		NA		NA		NA		NA		NA		NA		NA		NA		NA		NA		NA		NA
					NA		NA		NA		NA		NA		NA		NA		NA		NA		NA		NA		NA		NA		NA		NA		NA		NA		NA		NA		NA		NA		NA		NA
					NA		NA		NA		NA		NA		NA		NA		NA		NA		NA		NA		NA		NA		NA		NA		NA		NA		NA		NA		NA		NA		NA		NA
					NA		NA		NA		NA		NA		NA		NA		NA		NA		NA		NA		NA		NA		NA		NA		NA		NA		NA		NA		NA		NA		NA		NA
					NA		NA		NA		NA		NA		NA		NA		NA		NA		NA		NA		NA		NA		NA		NA		NA		NA		NA		NA		NA		NA		NA		NA
					NA		NA		NA		NA		NA		NA		NA		NA		NA		NA		NA		NA		NA		NA		NA		NA		NA		NA		NA		NA		NA		NA		NA
					NA		NA		NA		NA		NA		NA		NA		NA		NA		NA		NA		NA		NA		NA		NA		NA		NA		NA		NA		NA		NA		NA		NA
					NA		NA		NA		NA		NA		NA		NA		NA		NA		NA		NA		NA		NA		NA		NA		NA		NA		NA		NA		NA		NA		NA		NA
					NA		NA		NA		NA		NA		NA		NA		NA		NA		NA		NA		NA		NA		NA		NA		NA		NA		NA		NA		NA		NA		NA		NA
					NA		NA		NA		NA		NA		NA		NA		NA		NA		NA		NA		NA		NA		NA		NA		NA		NA		NA		NA		NA		NA		NA		NA
					NA		NA		NA		NA		NA		NA		NA		NA		NA		NA		NA		NA		NA		NA		NA		NA		NA		NA		NA		NA		NA		NA		NA
					NA		NA		NA		NA		NA		NA		NA		NA		NA		NA		NA		NA		NA		NA		NA		NA		NA		NA		NA		NA		NA		NA		NA
					NA		NA		NA		NA		NA		NA		NA		NA		NA		NA		NA		NA		NA		NA		NA		NA		NA		NA		NA		NA		NA		NA		NA
					NA		NA		NA		NA		NA		NA		NA		NA		NA		NA		NA		NA		NA		NA		NA		NA		NA		NA		NA		NA		NA		NA		NA
					NA		NA		NA		NA		NA		NA		NA		NA		NA		NA		NA		NA		NA		NA		NA		NA		NA		NA		NA		NA		NA		NA		NA
					NA		NA		NA		NA		NA		NA		NA		NA		NA		NA		NA		NA		NA		NA		NA		NA		NA		NA		NA		NA		NA		NA		NA
					NA		NA		NA		NA		NA		NA		NA		NA		NA		NA		NA		NA		NA		NA		NA		NA		NA		NA		NA		NA		NA		NA		NA
					NA		NA		NA		NA		NA		NA		NA		NA		NA		NA		NA		NA		NA		NA		NA		NA		NA		NA		NA		NA		NA		NA		NA
					NA		NA		NA		NA		NA		NA		NA		NA		NA		NA		NA		NA		NA		NA		NA		NA		NA		NA		NA		NA		NA		NA		NA
					NA		NA		NA		NA		NA		NA		NA		NA		NA		NA		NA		NA		NA		NA		NA		NA		NA		NA		NA		NA		NA		NA		NA
					NA		NA		NA		NA		NA		NA		NA		NA		NA		NA		NA		NA		NA		NA		NA		NA		NA		NA		NA		NA		NA		NA		NA
					NA		NA		NA		NA		NA		NA		NA		NA		NA		NA		NA		NA		NA		NA		NA		NA		NA		NA		NA		NA		NA		NA		NA
					NA		NA		NA		NA		NA		NA		NA		NA		NA		NA		NA		NA		NA		NA		NA		NA		NA		NA		NA		NA		NA		NA		NA
					NA		NA		NA		NA		NA		NA		NA		NA		NA		NA		NA		NA		NA		NA		NA		NA		NA		NA		NA		NA		NA		NA		NA
					NA		NA		NA		NA		NA		NA		NA		NA		NA		NA		NA		NA		NA		NA		NA		NA		NA		NA		NA		NA		NA		NA		NA
					NA		NA		NA		NA		NA		NA		NA		NA		NA		NA		NA		NA		NA		NA		NA		NA		NA		NA		NA		NA		NA		NA		NA
					NA		NA		NA		NA		NA		NA		NA		NA		NA		NA		NA		NA		NA		NA		NA		NA		NA		NA		NA		NA		NA		NA		NA
					NA		NA		NA		NA		NA		NA		NA		NA		NA		NA		NA		NA		NA		NA		NA		NA		NA		NA		NA		NA		NA		NA		NA
					NA		NA		NA		NA		NA		NA		NA		NA		NA		NA		NA		NA		NA		NA		NA		NA		NA		NA		NA		NA		NA		NA		NA
					NA		NA		NA		NA		NA		NA		NA		NA		NA		NA		NA		NA		NA		NA		NA		NA		NA		NA		NA		NA		NA		NA		NA
					NA		NA		NA		NA		NA		NA		NA		NA		NA		NA		NA		NA		NA		NA		NA		NA		NA		NA		NA		NA		NA		NA		NA
					NA		NA		NA		NA		NA		NA		NA		NA		NA		NA		NA		NA		NA		NA		NA		NA		NA		NA		NA		NA		NA		NA		NA
					NA		NA		NA		NA		NA		NA		NA		NA		NA		NA		NA		NA		NA		NA		NA		NA		NA		NA		NA		NA		NA		NA		NA
					NA		NA		NA		NA		NA		NA		NA		NA		NA		NA		NA		NA		NA		NA		NA		NA		NA		NA		NA		NA		NA		NA		NA
					NA		NA		NA		NA		NA		NA		NA		NA		NA		NA		NA		NA		NA		NA		NA		NA		NA		NA		NA		NA		NA		NA		NA
					NA		NA		NA		NA		NA		NA		NA		NA		NA		NA		NA		NA		NA		NA		NA		NA		NA		NA		NA		NA		NA		NA		NA
					NA		NA		NA		NA		NA		NA		NA		NA		NA		NA		NA		NA		NA		NA		NA		NA		NA		NA		NA		NA		NA		NA		NA
					NA		NA		NA		NA		NA		NA		NA		NA		NA		NA		NA		NA		NA		NA		NA		NA		NA		NA		NA		NA		NA		NA		NA
					NA		NA		NA		NA		NA		NA		NA		NA		NA		NA		NA		NA		NA		NA		NA		NA		NA		NA		NA		NA		NA		NA		NA
					NA		NA		NA		NA		NA		NA		NA		NA		NA		NA		NA		NA		NA		NA		NA		NA		NA		NA		NA		NA		NA		NA		NA
					NA		NA		NA		NA		NA		NA		NA		NA		NA		NA		NA		NA		NA		NA		NA		NA		NA		NA		NA		NA		NA		NA		NA
					NA		NA		NA		NA		NA		NA		NA		NA		NA		NA		NA		NA		NA		NA		NA		NA		NA		NA		NA		NA		NA		NA		NA
					NA		NA		NA		NA		NA		NA		NA		NA		NA		NA		NA		NA		NA		NA		NA		NA		NA		NA		NA		NA		NA		NA		NA
					NA		NA		NA		NA		NA		NA		NA		NA		NA		NA		NA		NA		NA		NA		NA		NA		NA		NA		NA		NA		NA		NA		NA
					NA		NA		NA		NA		NA		NA		NA		NA		NA		NA		NA		NA		NA		NA		NA		NA		NA		NA		NA		NA		NA		NA		NA
					NA		NA		NA		NA		NA		NA		NA		NA		NA		NA		NA		NA		NA		NA		NA		NA		NA		NA		NA		NA		NA		NA		NA
					NA		NA		NA		NA		NA		NA		NA		NA		NA		NA		NA		NA		NA		NA		NA		NA		NA		NA		NA		NA		NA		NA		NA
					NA		NA		NA		NA		NA		NA		NA		NA		NA		NA		NA		NA		NA		NA		NA		NA		NA		NA		NA		NA		NA		NA		NA
					NA		NA		NA		NA		NA		NA		NA		NA		NA		NA		NA		NA		NA		NA		NA		NA		NA		NA		NA		NA		NA		NA		NA
					NA		NA		NA		NA		NA		NA		NA		NA		NA		NA		NA		NA		NA		NA		NA		NA		NA		NA		NA		NA		NA		NA		NA
					NA		NA		NA		NA		NA		NA		NA		NA		NA		NA		NA		NA		NA		NA		NA		NA		NA		NA		NA		NA		NA		NA		NA
					NA		NA		NA		NA		NA		NA		NA		NA		NA		NA		NA		NA		NA		NA		NA		NA		NA		NA		NA		NA		NA		NA		NA
					NA		NA		NA		NA		NA		NA		NA		NA		NA		NA		NA		NA		NA		NA		NA		NA		NA		NA		NA		NA		NA		NA		NA
					NA		NA		NA		NA		NA		NA		NA		NA		NA		NA		NA		NA		NA		NA		NA		NA		NA		NA		NA		NA		NA		NA		NA
					NA		NA		NA		NA		NA		NA		NA		NA		NA		NA		NA		NA		NA		NA		NA		NA		NA		NA		NA		NA		NA		NA		NA
					NA		NA		NA		NA		NA		NA		NA		NA		NA		NA		NA		NA		NA		NA		NA		NA		NA		NA		NA		NA		NA		NA		NA
					NA		NA		NA		NA		NA		NA		NA		NA		NA		NA		NA		NA		NA		NA		NA		NA		NA		NA		NA		NA		NA		NA		NA
					NA		NA		NA		NA		NA		NA		NA		NA		NA		NA		NA		NA		NA		NA		NA		NA		NA		NA		NA		NA		NA		NA		NA
					NA		NA		NA		NA		NA		NA		NA		NA		NA		NA		NA		NA		NA		NA		NA		NA		NA		NA		NA		NA		NA		NA		NA
					NA		NA		NA		NA		NA		NA		NA		NA		NA		NA		NA		NA		NA		NA		NA		NA		NA		NA		NA		NA		NA		NA		NA
					NA		NA		NA		NA		NA		NA		NA		NA		NA		NA		NA		NA		NA		NA		NA		NA		NA		NA		NA		NA		NA		NA		NA
					NA		NA		NA		NA		NA		NA		NA		NA		NA		NA		NA		NA		NA		NA		NA		NA		NA		NA		NA		NA		NA		NA		NA
					NA		NA		NA		NA		NA		NA		NA		NA		NA		NA		NA		NA		NA		NA		NA		NA		NA		NA		NA		NA		NA		NA		NA
					NA		NA		NA		NA		NA		NA		NA		NA		NA		NA		NA		NA		NA		NA		NA		NA		NA		NA		NA		NA		NA		NA		NA
					NA		NA		NA		NA		NA		NA		NA		NA		NA		NA		NA		NA		NA		NA		NA		NA		NA		NA		NA		NA		NA		NA		NA
					NA		NA		NA		NA		NA		NA		NA		NA		NA		NA		NA		NA		NA		NA		NA		NA		NA		NA		NA		NA		NA		NA		NA
					NA		NA		NA		NA		NA		NA		NA		NA		NA		NA		NA		NA		NA		NA		NA		NA		NA		NA		NA		NA		NA		NA		NA
					NA		NA		NA		NA		NA		NA		NA		NA		NA		NA		NA		NA		NA		NA		NA		NA		NA		NA		NA		NA		NA		NA		NA
					NA		NA		NA		NA		NA		NA		NA		NA		NA		NA		NA		NA		NA		NA		NA		NA		NA		NA		NA		NA		NA		NA		NA
					NA		NA		NA		NA		NA		NA		NA		NA		NA		NA		NA		NA		NA		NA		NA		NA		NA		NA		NA		NA		NA		NA		NA
					NA		NA		NA		NA		NA		NA		NA		NA		NA		NA		NA		NA		NA		NA		NA		NA		NA		NA		NA		NA		NA		NA		NA
					NA		NA		NA		NA		NA		NA		NA		NA		NA		NA		NA		NA		NA		NA		NA		NA		NA		NA		NA		NA		NA		NA		NA
					NA		NA		NA		NA		NA		NA		NA		NA		NA		NA		NA		NA		NA		NA		NA		NA		NA		NA		NA		NA		NA		NA		NA
					NA		NA		NA		NA		NA		NA		NA		NA		NA		NA		NA		NA		NA		NA		NA		NA		NA		NA		NA		NA		NA		NA		NA
					NA		NA		NA		NA		NA		NA		NA		NA		NA		NA		NA		NA		NA		NA		NA		NA		NA		NA		NA		NA		NA		NA		NA
					NA		NA		NA		NA		NA		NA		NA		NA		NA		NA		NA		NA		NA		NA		NA		NA		NA		NA		NA		NA		NA		NA		NA
					NA		NA		NA		NA		NA		NA		NA		NA		NA		NA		NA		NA		NA		NA		NA		NA		NA		NA		NA		NA		NA		NA		NA
					NA		NA		NA		NA		NA		NA		NA		NA		NA		NA		NA		NA		NA		NA		NA		NA		NA		NA		NA		NA		NA		NA		NA
					NA		NA		NA		NA		NA		NA		NA		NA		NA		NA		NA		NA		NA		NA		NA		NA		NA		NA		NA		NA		NA		NA		NA
					NA		NA		NA		NA		NA		NA		NA		NA		NA		NA		NA		NA		NA		NA		NA		NA		NA		NA		NA		NA		NA		NA		NA
					NA		NA		NA		NA		NA		NA		NA		NA		NA		NA		NA		NA		NA		NA		NA		NA		NA		NA		NA		NA		NA		NA		NA
					NA		NA		NA		NA		NA		NA		NA		NA		NA		NA		NA		NA		NA		NA		NA		NA		NA		NA		NA		NA		NA		NA		NA
					NA		NA		NA		NA		NA		NA		NA		NA		NA		NA		NA		NA		NA		NA		NA		NA		NA		NA		NA		NA		NA		NA		NA
					NA		NA		NA		NA		NA		NA		NA		NA		NA		NA		NA		NA		NA		NA		NA		NA		NA		NA		NA		NA		NA		NA		NA
					NA		NA		NA		NA		NA		NA		NA		NA		NA		NA		NA		NA		NA		NA		NA		NA		NA		NA		NA		NA		NA		NA		NA
					NA		NA		NA		NA		NA		NA		NA		NA		NA		NA		NA		NA		NA		NA		NA		NA		NA		NA		NA		NA		NA		NA		NA
					NA		NA		NA		NA		NA		NA		NA		NA		NA		NA		NA		NA		NA		NA		NA		NA		NA		NA		NA		NA		NA		NA		NA
					NA		NA		NA		NA		NA		NA		NA		NA		NA		NA		NA		NA		NA		NA		NA		NA		NA		NA		NA		NA		NA		NA		NA
					NA		NA		NA		NA		NA		NA		NA		NA		NA		NA		NA		NA		NA		NA		NA		NA		NA		NA		NA		NA		NA		NA		NA
					NA		NA		NA		NA		NA		NA		NA		NA		NA		NA		NA		NA		NA		NA		NA		NA		NA		NA		NA		NA		NA		NA		NA
					NA		NA		NA		NA		NA		NA		NA		NA		NA		NA		NA		NA		NA		NA		NA		NA		NA		NA		NA		NA		NA		NA		NA
					NA		NA		NA		NA		NA		NA		NA		NA		NA		NA		NA		NA		NA		NA		NA		NA		NA		NA		NA		NA		NA		NA		NA
					NA		NA		NA		NA		NA		NA		NA		NA		NA		NA		NA		NA		NA		NA		NA		NA		NA		NA		NA		NA		NA		NA		NA
					NA		NA		NA		NA		NA		NA		NA		NA		NA		NA		NA		NA		NA		NA		NA		NA		NA		NA		NA		NA		NA		NA		NA
					NA		NA		NA		NA		NA		NA		NA		NA		NA		NA		NA		NA		NA		NA		NA		NA		NA		NA		NA		NA		NA		NA		NA
					NA		NA		NA		NA		NA		NA		NA		NA		NA		NA		NA		NA		NA		NA		NA		NA		NA		NA		NA		NA		NA		NA		NA
					NA		NA		NA		NA		NA		NA		NA		NA		NA		NA		NA		NA		NA		NA		NA		NA		NA		NA		NA		NA		NA		NA		NA
					NA		NA		NA		NA		NA		NA		NA		NA		NA		NA		NA		NA		NA		NA		NA		NA		NA		NA		NA		NA		NA		NA		NA
					NA		NA		NA		NA		NA		NA		NA		NA		NA		NA		NA		NA		NA		NA		NA		NA		NA		NA		NA		NA		NA		NA		NA
					NA		NA		NA		NA		NA		NA		NA		NA		NA		NA		NA		NA		NA		NA		NA		NA		NA		NA		NA		NA		NA		NA		NA
					NA		NA		NA		NA		NA		NA		NA		NA		NA		NA		NA		NA		NA		NA		NA		NA		NA		NA		NA		NA		NA		NA		NA
					NA		NA		NA		NA		NA		NA		NA		NA		NA		NA		NA		NA		NA		NA		NA		NA		NA		NA		NA		NA		NA		NA		NA
					NA		NA		NA		NA		NA		NA		NA		NA		NA		NA		NA		NA		NA		NA		NA		NA		NA		NA		NA		NA		NA		NA		NA
					NA		NA		NA		NA		NA		NA		NA		NA		NA		NA		NA		NA		NA		NA		NA		NA		NA		NA		NA		NA		NA		NA		NA
					NA		NA		NA		NA		NA		NA		NA		NA		NA		NA		NA		NA		NA		NA		NA		NA		NA		NA		NA		NA		NA		NA		NA
					NA		NA		NA		NA		NA		NA		NA		NA		NA		NA		NA		NA		NA		NA		NA		NA		NA		NA		NA		NA		NA		NA		NA
					NA		NA		NA		NA		NA		NA		NA		NA		NA		NA		NA		NA		NA		NA		NA		NA		NA		NA		NA		NA		NA		NA		NA
					NA		NA		NA		NA		NA		NA		NA		NA		NA		NA		NA		NA		NA		NA		NA		NA		NA		NA		NA		NA		NA		NA		NA
					NA		NA		NA		NA		NA		NA		NA		NA		NA		NA		NA		NA		NA		NA		NA		NA		NA		NA		NA		NA		NA		NA		NA
					NA		NA		NA		NA		NA		NA		NA		NA		NA		NA		NA		NA		NA		NA		NA		NA		NA		NA		NA		NA		NA		NA		NA
					NA		NA		NA		NA		NA		NA		NA		NA		NA		NA		NA		NA		NA		NA		NA		NA		NA		NA		NA		NA		NA		NA		NA
					NA		NA		NA		NA		NA		NA		NA		NA		NA		NA		NA		NA		NA		NA		NA		NA		NA		NA		NA		NA		NA		NA		NA
					NA		NA		NA		NA		NA		NA		NA		NA		NA		NA		NA		NA		NA		NA		NA		NA		NA		NA		NA		NA		NA		NA		NA
					NA		NA		NA		NA		NA		NA		NA		NA		NA		NA		NA		NA		NA		NA		NA		NA		NA		NA		NA		NA		NA		NA		NA
					NA		NA		NA		NA		NA		NA		NA		NA		NA		NA		NA		NA		NA		NA		NA		NA		NA		NA		NA		NA		NA		NA		NA
					NA		NA		NA		NA		NA		NA		NA		NA		NA		NA		NA		NA		NA		NA		NA		NA		NA		NA		NA		NA		NA		NA		NA
					NA		NA		NA		NA		NA		NA		NA		NA		NA		NA		NA		NA		NA		NA		NA		NA		NA		NA		NA		NA		NA		NA		NA
					NA		NA		NA		NA		NA		NA		NA		NA		NA		NA		NA		NA		NA		NA		NA		NA		NA		NA		NA		NA		NA		NA		NA
					NA		NA		NA		NA		NA		NA		NA		NA		NA		NA		NA		NA		NA		NA		NA		NA		NA		NA		NA		NA		NA		NA		NA
					NA		NA		NA		NA		NA		NA		NA		NA		NA		NA		NA		NA		NA		NA		NA		NA		NA		NA		NA		NA		NA		NA		NA
					NA		NA		NA		NA		NA		NA		NA		NA		NA		NA		NA		NA		NA		NA		NA		NA		NA		NA		NA		NA		NA		NA		NA
					NA		NA		NA		NA		NA		NA		NA		NA		NA		NA		NA		NA		NA		NA		NA		NA		NA		NA		NA		NA		NA		NA		NA
					NA		NA		NA		NA		NA		NA		NA		NA		NA		NA		NA		NA		NA		NA		NA		NA		NA		NA		NA		NA		NA		NA		NA
					NA		NA		NA		NA		NA		NA		NA		NA		NA		NA		NA		NA		NA		NA		NA		NA		NA		NA		NA		NA		NA		NA		NA
					NA		NA		NA		NA		NA		NA		NA		NA		NA		NA		NA		NA		NA		NA		NA		NA		NA		NA		NA		NA		NA		NA		NA
					NA		NA		NA		NA		NA		NA		NA		NA		NA		NA		NA		NA		NA		NA		NA		NA		NA		NA		NA		NA		NA		NA		NA
					NA		NA		NA		NA		NA		NA		NA		NA		NA		NA		NA		NA		NA		NA		NA		NA		NA		NA		NA		NA		NA		NA		NA
					NA		NA		NA		NA		NA		NA		NA		NA		NA		NA		NA		NA		NA		NA		NA		NA		NA		NA		NA		NA		NA		NA		NA
					NA		NA		NA		NA		NA		NA		NA		NA		NA		NA		NA		NA		NA		NA		NA		NA		NA		NA		NA		NA		NA		NA		NA
					NA		NA		NA		NA		NA		NA		NA		NA		NA		NA		NA		NA		NA		NA		NA		NA		NA		NA		NA		NA		NA		NA		NA
					NA		NA		NA		NA		NA		NA		NA		NA		NA		NA		NA		NA		NA		NA		NA		NA		NA		NA		NA		NA		NA		NA		NA
					NA		NA		NA		NA		NA		NA		NA		NA		NA		NA		NA		NA		NA		NA		NA		NA		NA		NA		NA		NA		NA		NA		NA
					NA		NA		NA		NA		NA		NA		NA		NA		NA		NA		NA		NA		NA		NA		NA		NA		NA		NA		NA		NA		NA		NA		NA
					NA		NA		NA		NA		NA		NA		NA		NA		NA		NA		NA		NA		NA		NA		NA		NA		NA		NA		NA		NA		NA		NA		NA
					NA		NA		NA		NA		NA		NA		NA		NA		NA		NA		NA		NA		NA		NA		NA		NA		NA		NA		NA		NA		NA		NA		NA
					NA		NA		NA		NA		NA		NA		NA		NA		NA		NA		NA		NA		NA		NA		NA		NA		NA		NA		NA		NA		NA		NA		NA
					NA		NA		NA		NA		NA		NA		NA		NA		NA		NA		NA		NA		NA		NA		NA		NA		NA		NA		NA		NA		NA		NA		NA
					NA		NA		NA		NA		NA		NA		NA		NA		NA		NA		NA		NA		NA		NA		NA		NA		NA		NA		NA		NA		NA		NA		NA
					NA		NA		NA		NA		NA		NA		NA		NA		NA		NA		NA		NA		NA		NA		NA		NA		NA		NA		NA		NA		NA		NA		NA
					NA		NA		NA		NA		NA		NA		NA		NA		NA		NA		NA		NA		NA		NA		NA		NA		NA		NA		NA		NA		NA		NA		NA
					NA		NA		NA		NA		NA		NA		NA		NA		NA		NA		NA		NA		NA		NA		NA		NA		NA		NA		NA		NA		NA		NA		NA
					NA		NA		NA		NA		NA		NA		NA		NA		NA		NA		NA		NA		NA		NA		NA		NA		NA		NA		NA		NA		NA		NA		NA
					NA		NA		NA		NA		NA		NA		NA		NA		NA		NA		NA		NA		NA		NA		NA		NA		NA		NA		NA		NA		NA		NA		NA
					NA		NA		NA		NA		NA		NA		NA		NA		NA		NA		NA		NA		NA		NA		NA		NA		NA		NA		NA		NA		NA		NA		NA
					NA		NA		NA		NA		NA		NA		NA		NA		NA		NA		NA		NA		NA		NA		NA		NA		NA		NA		NA		NA		NA		NA		NA
					NA		NA		NA		NA		NA		NA		NA		NA		NA		NA		NA		NA		NA		NA		NA		NA		NA		NA		NA		NA		NA		NA		NA
					NA		NA		NA		NA		NA		NA		NA		NA		NA		NA		NA		NA		NA		NA		NA		NA		NA		NA		NA		NA		NA		NA		NA
					NA		NA		NA		NA		NA		NA		NA		NA		NA		NA		NA		NA		NA		NA		NA		NA		NA		NA		NA		NA		NA		NA		NA
					NA		NA		NA		NA		NA		NA		NA		NA		NA		NA		NA		NA		NA		NA		NA		NA		NA		NA		NA		NA		NA		NA		NA
					NA		NA		NA		NA		NA		NA		NA		NA		NA		NA		NA		NA		NA		NA		NA		NA		NA		NA		NA		NA		NA		NA		NA
					NA		NA		NA		NA		NA		NA		NA		NA		NA		NA		NA		NA		NA		NA		NA		NA		NA		NA		NA		NA		NA		NA		NA
					NA		NA		NA		NA		NA		NA		NA		NA		NA		NA		NA		NA		NA		NA		NA		NA		NA		NA		NA		NA		NA		NA		NA
					NA		NA		NA		NA		NA		NA		NA		NA		NA		NA		NA		NA		NA		NA		NA		NA		NA		NA		NA		NA		NA		NA		NA
					NA		NA		NA		NA		NA		NA		NA		NA		NA		NA		NA		NA		NA		NA		NA		NA		NA		NA		NA		NA		NA		NA		NA
					NA		NA		NA		NA		NA		NA		NA		NA		NA		NA		NA		NA		NA		NA		NA		NA		NA		NA		NA		NA		NA		NA		NA
					NA		NA		NA		NA		NA		NA		NA		NA		NA		NA		NA		NA		NA		NA		NA		NA		NA		NA		NA		NA		NA		NA		NA
					NA		NA		NA		NA		NA		NA		NA		NA		NA		NA		NA		NA		NA		NA		NA		NA		NA		NA		NA		NA		NA		NA		NA
					NA		NA		NA		NA		NA		NA		NA		NA		NA		NA		NA		NA		NA		NA		NA		NA		NA		NA		NA		NA		NA		NA		NA
					NA		NA		NA		NA		NA		NA		NA		NA		NA		NA		NA		NA		NA		NA		NA		NA		NA		NA		NA		NA		NA		NA		NA
					NA		NA		NA		NA		NA		NA		NA		NA		NA		NA		NA		NA		NA		NA		NA		NA		NA		NA		NA		NA		NA		NA		NA
					NA		NA		NA		NA		NA		NA		NA		NA		NA		NA		NA		NA		NA		NA		NA		NA		NA		NA		NA		NA		NA		NA		NA
					NA		NA		NA		NA		NA		NA		NA		NA		NA		NA		NA		NA		NA		NA		NA		NA		NA		NA		NA		NA		NA		NA		NA
					NA		NA		NA		NA		NA		NA		NA		NA		NA		NA		NA		NA		NA		NA		NA		NA		NA		NA		NA		NA		NA		NA		NA
					NA		NA		NA		NA		NA		NA		NA		NA		NA		NA		NA		NA		NA		NA		NA		NA		NA		NA		NA		NA		NA		NA		NA
					NA		NA		NA		NA		NA		NA		NA		NA		NA		NA		NA		NA		NA		NA		NA		NA		NA		NA		NA		NA		NA		NA		NA
					NA		NA		NA		NA		NA		NA		NA		NA		NA		NA		NA		NA		NA		NA		NA		NA		NA		NA		NA		NA		NA		NA		NA
					NA		NA		NA		NA		NA		NA		NA		NA		NA		NA		NA		NA		NA		NA		NA		NA		NA		NA		NA		NA		NA		NA		NA
					NA		NA		NA		NA		NA		NA		NA		NA		NA		NA		NA		NA		NA		NA		NA		NA		NA		NA		NA		NA		NA		NA		NA
					NA		NA		NA		NA		NA		NA		NA		NA		NA		NA		NA		NA		NA		NA		NA		NA		NA		NA		NA		NA		NA		NA		NA
					NA		NA		NA		NA		NA		NA		NA		NA		NA		NA		NA		NA		NA		NA		NA		NA		NA		NA		NA		NA		NA		NA		NA
					NA		NA		NA		NA		NA		NA		NA		NA		NA		NA		NA		NA		NA		NA		NA		NA		NA		NA		NA		NA		NA		NA		NA
					NA		NA		NA		NA		NA		NA		NA		NA		NA		NA		NA		NA		NA		NA		NA		NA		NA		NA		NA		NA		NA		NA		NA
					NA		NA		NA		NA		NA		NA		NA		NA		NA		NA		NA		NA		NA		NA		NA		NA		NA		NA		NA		NA		NA		NA		NA
					NA		NA		NA		NA		NA		NA		NA		NA		NA		NA		NA		NA		NA		NA		NA		NA		NA		NA		NA		NA		NA		NA		NA
					NA		NA		NA		NA		NA		NA		NA		NA		NA		NA		NA		NA		NA		NA		NA		NA		NA		NA		NA		NA		NA		NA		NA
					NA		NA		NA		NA		NA		NA		NA		NA		NA		NA		NA		NA		NA		NA		NA		NA		NA		NA		NA		NA		NA		NA		NA
					NA		NA		NA		NA		NA		NA		NA		NA		NA		NA		NA		NA		NA		NA		NA		NA		NA		NA		NA		NA		NA		NA		NA
					NA		NA		NA		NA		NA		NA		NA		NA		NA		NA		NA		NA		NA		NA		NA		NA		NA		NA		NA		NA		NA		NA		NA
					NA		NA		NA		NA		NA		NA		NA		NA		NA		NA		NA		NA		NA		NA		NA		NA		NA		NA		NA		NA		NA		NA		NA
					NA		NA		NA		NA		NA		NA		NA		NA		NA		NA		NA		NA		NA		NA		NA		NA		NA		NA		NA		NA		NA		NA		NA
					NA		NA		NA		NA		NA		NA		NA		NA		NA		NA		NA		NA		NA		NA		NA		NA		NA		NA		NA		NA		NA		NA		NA
					NA		NA		NA		NA		NA		NA		NA		NA		NA		NA		NA		NA		NA		NA		NA		NA		NA		NA		NA		NA		NA		NA		NA
					NA		NA		NA		NA		NA		NA		NA		NA		NA		NA		NA		NA		NA		NA		NA		NA		NA		NA		NA		NA		NA		NA		NA
					NA		NA		NA		NA		NA		NA		NA		NA		NA		NA		NA		NA		NA		NA		NA		NA		NA		NA		NA		NA		NA		NA		NA
					NA		NA		NA		NA		NA		NA		NA		NA		NA		NA		NA		NA		NA		NA		NA		NA		NA		NA		NA		NA		NA		NA		NA
					NA		NA		NA		NA		NA		NA		NA		NA		NA		NA		NA		NA		NA		NA		NA		NA		NA		NA		NA		NA		NA		NA		NA
					NA		NA		NA		NA		NA		NA		NA		NA		NA		NA		NA		NA		NA		NA		NA		NA		NA		NA		NA		NA		NA		NA		NA
					NA		NA		NA		NA		NA		NA		NA		NA		NA		NA		NA		NA		NA		NA		NA		NA		NA		NA		NA		NA		NA		NA		NA
					NA		NA		NA		NA		NA		NA		NA		NA		NA		NA		NA		NA		NA		NA		NA		NA		NA		NA		NA		NA		NA		NA		NA
					NA		NA		NA		NA		NA		NA		NA		NA		NA		NA		NA		NA		NA		NA		NA		NA		NA		NA		NA		NA		NA		NA		NA
					NA		NA		NA		NA		NA		NA		NA		NA		NA		NA		NA		NA		NA		NA		NA		NA		NA		NA		NA		NA		NA		NA		NA
					NA		NA		NA		NA		NA		NA		NA		NA		NA		NA		NA		NA		NA		NA		NA		NA		NA		NA		NA		NA		NA		NA		NA
					NA		NA		NA		NA		NA		NA		NA		NA		NA		NA		NA		NA		NA		NA		NA		NA		NA		NA		NA		NA		NA		NA		NA
					NA		NA		NA		NA		NA		NA		NA		NA		NA		NA		NA		NA		NA		NA		NA		NA		NA		NA		NA		NA		NA		NA		NA
					NA		NA		NA		NA		NA		NA		NA		NA		NA		NA		NA		NA		NA		NA		NA		NA		NA		NA		NA		NA		NA		NA		NA
					NA		NA		NA		NA		NA		NA		NA		NA		NA		NA		NA		NA		NA		NA		NA		NA		NA		NA		NA		NA		NA		NA		NA
					NA		NA		NA		NA		NA		NA		NA		NA		NA		NA		NA		NA		NA		NA		NA		NA		NA		NA		NA		NA		NA		NA		NA
					NA		NA		NA		NA		NA		NA		NA		NA		NA		NA		NA		NA		NA		NA		NA		NA		NA		NA		NA		NA		NA		NA		NA
					NA		NA		NA		NA		NA		NA		NA		NA		NA		NA		NA		NA		NA		NA		NA		NA		NA		NA		NA		NA		NA		NA		NA
					NA		NA		NA		NA		NA		NA		NA		NA		NA		NA		NA		NA		NA		NA		NA		NA		NA		NA		NA		NA		NA		NA		NA
					NA		NA		NA		NA		NA		NA		NA		NA		NA		NA		NA		NA		NA		NA		NA		NA		NA		NA		NA		NA		NA		NA		NA
					NA		NA		NA		NA		NA		NA		NA		NA		NA		NA		NA		NA		NA		NA		NA		NA		NA		NA		NA		NA		NA		NA		NA
					NA		NA		NA		NA		NA		NA		NA		NA		NA		NA		NA		NA		NA		NA		NA		NA		NA		NA		NA		NA		NA		NA		NA
					NA		NA		NA		NA		NA		NA		NA		NA		NA		NA		NA		NA		NA		NA		NA		NA		NA		NA		NA		NA		NA		NA		NA
					NA		NA		NA		NA		NA		NA		NA		NA		NA		NA		NA		NA		NA		NA		NA		NA		NA		NA		NA		NA		NA		NA		NA
					NA		NA		NA		NA		NA		NA		NA		NA		NA		NA		NA		NA		NA		NA		NA		NA		NA		NA		NA		NA		NA		NA		NA
					NA		NA		NA		NA		NA		NA		NA		NA		NA		NA		NA		NA		NA		NA		NA		NA		NA		NA		NA		NA		NA		NA		NA
					NA		NA		NA		NA		NA		NA		NA		NA		NA		NA		NA		NA		NA		NA		NA		NA		NA		NA		NA		NA		NA		NA		NA
					NA		NA		NA		NA		NA		NA		NA		NA		NA		NA		NA		NA		NA		NA		NA		NA		NA		NA		NA		NA		NA		NA		NA
					NA		NA		NA		NA		NA		NA		NA		NA		NA		NA		NA		NA		NA		NA		NA		NA		NA		NA		NA		NA		NA		NA		NA
					NA		NA		NA		NA		NA		NA		NA		NA		NA		NA		NA		NA		NA		NA		NA		NA		NA		NA		NA		NA		NA		NA		NA
					NA		NA		NA		NA		NA		NA		NA		NA		NA		NA		NA		NA		NA		NA		NA		NA		NA		NA		NA		NA		NA		NA		NA
					NA		NA		NA		NA		NA		NA		NA		NA		NA		NA		NA		NA		NA		NA		NA		NA		NA		NA		NA		NA		NA		NA		NA
					NA		NA		NA		NA		NA		NA		NA		NA		NA		NA		NA		NA		NA		NA		NA		NA		NA		NA		NA		NA		NA		NA		NA
					NA		NA		NA		NA		NA		NA		NA		NA		NA		NA		NA		NA		NA		NA		NA		NA		NA		NA		NA		NA		NA		NA		NA
					NA		NA		NA		NA		NA		NA		NA		NA		NA		NA		NA		NA		NA		NA		NA		NA		NA		NA		NA		NA		NA		NA		NA
					NA		NA		NA		NA		NA		NA		NA		NA		NA		NA		NA		NA		NA		NA		NA		NA		NA		NA		NA		NA		NA		NA		NA
					NA		NA		NA		NA		NA		NA		NA		NA		NA		NA		NA		NA		NA		NA		NA		NA		NA		NA		NA		NA		NA		NA		NA
					NA		NA		NA		NA		NA		NA		NA		NA		NA		NA		NA		NA		NA		NA		NA		NA		NA		NA		NA		NA		NA		NA		NA
					NA		NA		NA		NA		NA		NA		NA		NA		NA		NA		NA		NA		NA		NA		NA		NA		NA		NA		NA		NA		NA		NA		NA
					NA		NA		NA		NA		NA		NA		NA		NA		NA		NA		NA		NA		NA		NA		NA		NA		NA		NA		NA		NA		NA		NA		NA
					NA		NA		NA		NA		NA		NA		NA		NA		NA		NA		NA		NA		NA		NA		NA		NA		NA		NA		NA		NA		NA		NA		NA
					NA		NA		NA		NA		NA		NA		NA		NA		NA		NA		NA		NA		NA		NA		NA		NA		NA		NA		NA		NA		NA		NA		NA
					NA		NA		NA		NA		NA		NA		NA		NA		NA		NA		NA		NA		NA		NA		NA		NA		NA		NA		NA		NA		NA		NA		NA
					NA		NA		NA		NA		NA		NA		NA		NA		NA		NA		NA		NA		NA		NA		NA		NA		NA		NA		NA		NA		NA		NA		NA
					NA		NA		NA		NA		NA		NA		NA		NA		NA		NA		NA		NA		NA		NA		NA		NA		NA		NA		NA		NA		NA		NA		NA
					NA		NA		NA		NA		NA		NA		NA		NA		NA		NA		NA		NA		NA		NA		NA		NA		NA		NA		NA		NA		NA		NA		NA
					NA		NA		NA		NA		NA		NA		NA		NA		NA		NA		NA		NA		NA		NA		NA		NA		NA		NA		NA		NA		NA		NA		NA
					NA		NA		NA		NA		NA		NA		NA		NA		NA		NA		NA		NA		NA		NA		NA		NA		NA		NA		NA		NA		NA		NA		NA
					NA		NA		NA		NA		NA		NA		NA		NA		NA		NA		NA		NA		NA		NA		NA		NA		NA		NA		NA		NA		NA		NA		NA
					NA		NA		NA		NA		NA		NA		NA		NA		NA		NA		NA		NA		NA		NA		NA		NA		NA		NA		NA		NA		NA		NA		NA
					NA		NA		NA		NA		NA		NA		NA		NA		NA		NA		NA		NA		NA		NA		NA		NA		NA		NA		NA		NA		NA		NA		NA
					NA		NA		NA		NA		NA		NA		NA		NA		NA		NA		NA		NA		NA		NA		NA		NA		NA		NA		NA		NA		NA		NA		NA
					NA		NA		NA		NA		NA		NA		NA		NA		NA		NA		NA		NA		NA		NA		NA		NA		NA		NA		NA		NA		NA		NA		NA
					NA		NA		NA		NA		NA		NA		NA		NA		NA		NA		NA		NA		NA		NA		NA		NA		NA		NA		NA		NA		NA		NA		NA
					NA		NA		NA		NA		NA		NA		NA		NA		NA		NA		NA		NA		NA		NA		NA		NA		NA		NA		NA		NA		NA		NA		NA
					NA		NA		NA		NA		NA		NA		NA		NA		NA		NA		NA		NA		NA		NA		NA		NA		NA		NA		NA		NA		NA		NA		NA
					NA		NA		NA		NA		NA		NA		NA		NA		NA		NA		NA		NA		NA		NA		NA		NA		NA		NA		NA		NA		NA		NA		NA
					NA		NA		NA		NA		NA		NA		NA		NA		NA		NA		NA		NA		NA		NA		NA		NA		NA		NA		NA		NA		NA		NA		NA
					NA		NA		NA		NA		NA		NA		NA		NA		NA		NA		NA		NA		NA		NA		NA		NA		NA		NA		NA		NA		NA		NA		NA
					NA		NA		NA		NA		NA		NA		NA		NA		NA		NA		NA		NA		NA		NA		NA		NA		NA		NA		NA		NA		NA		NA		NA
					NA		NA		NA		NA		NA		NA		NA		NA		NA		NA		NA		NA		NA		NA		NA		NA		NA		NA		NA		NA		NA		NA		NA
					NA		NA		NA		NA		NA		NA		NA		NA		NA		NA		NA		NA		NA		NA		NA		NA		NA		NA		NA		NA		NA		NA		NA
					NA		NA		NA		NA		NA		NA		NA		NA		NA		NA		NA		NA		NA		NA		NA		NA		NA		NA		NA		NA		NA		NA		NA
					NA		NA		NA		NA		NA		NA		NA		NA		NA		NA		NA		NA		NA		NA		NA		NA		NA		NA		NA		NA		NA		NA		NA
					NA		NA		NA		NA		NA		NA		NA		NA		NA		NA		NA		NA		NA		NA		NA		NA		NA		NA		NA		NA		NA		NA		NA
					NA		NA		NA		NA		NA		NA		NA		NA		NA		NA		NA		NA		NA		NA		NA		NA		NA		NA		NA		NA		NA		NA		NA
					NA		NA		NA		NA		NA		NA		NA		NA		NA		NA		NA		NA		NA		NA		NA		NA		NA		NA		NA		NA		NA		NA		NA
					NA		NA		NA		NA		NA		NA		NA		NA		NA		NA		NA		NA		NA		NA		NA		NA		NA		NA		NA		NA		NA		NA		NA
					NA		NA		NA		NA		NA		NA		NA		NA		NA		NA		NA		NA		NA		NA		NA		NA		NA		NA		NA		NA		NA		NA		NA
					NA		NA		NA		NA		NA		NA		NA		NA		NA		NA		NA		NA		NA		NA		NA		NA		NA		NA		NA		NA		NA		NA		NA
					NA		NA		NA		NA		NA		NA		NA		NA		NA		NA		NA		NA		NA		NA		NA		NA		NA		NA		NA		NA		NA		NA		NA
					NA		NA		NA		NA		NA		NA		NA		NA		NA		NA		NA		NA		NA		NA		NA		NA		NA		NA		NA		NA		NA		NA		NA
					NA		NA		NA		NA		NA		NA		NA		NA		NA		NA		NA		NA		NA		NA		NA		NA		NA		NA		NA		NA		NA		NA		NA
					NA		NA		NA		NA		NA		NA		NA		NA		NA		NA		NA		NA		NA		NA		NA		NA		NA		NA		NA		NA		NA		NA		NA
					NA		NA		NA		NA		NA		NA		NA		NA		NA		NA		NA		NA		NA		NA		NA		NA		NA		NA		NA		NA		NA		NA		NA
					NA		NA		NA		NA		NA		NA		NA		NA		NA		NA		NA		NA		NA		NA		NA		NA		NA		NA		NA		NA		NA		NA		NA
					NA		NA		NA		NA		NA		NA		NA		NA		NA		NA		NA		NA		NA		NA		NA		NA		NA		NA		NA		NA		NA		NA		NA
					NA		NA		NA		NA		NA		NA		NA		NA		NA		NA		NA		NA		NA		NA		NA		NA		NA		NA		NA		NA		NA		NA		NA
					NA		NA		NA		NA		NA		NA		NA		NA		NA		NA		NA		NA		NA		NA		NA		NA		NA		NA		NA		NA		NA		NA		NA
					NA		NA		NA		NA		NA		NA		NA		NA		NA		NA		NA		NA		NA		NA		NA		NA		NA		NA		NA		NA		NA		NA		NA
					NA		NA		NA		NA		NA		NA		NA		NA		NA		NA		NA		NA		NA		NA		NA		NA		NA		NA		NA		NA		NA		NA		NA
					NA		NA		NA		NA		NA		NA		NA		NA		NA		NA		NA		NA		NA		NA		NA		NA		NA		NA		NA		NA		NA		NA		NA
					NA		NA		NA		NA		NA		NA		NA		NA		NA		NA		NA		NA		NA		NA		NA		NA		NA		NA		NA		NA		NA		NA		NA
					NA		NA		NA		NA		NA		NA		NA		NA		NA		NA		NA		NA		NA		NA		NA		NA		NA		NA		NA		NA		NA		NA		NA
					NA		NA		NA		NA		NA		NA		NA		NA		NA		NA		NA		NA		NA		NA		NA		NA		NA		NA		NA		NA		NA		NA		NA
					NA		NA		NA		NA		NA		NA		NA		NA		NA		NA		NA		NA		NA		NA		NA		NA		NA		NA		NA		NA		NA		NA		NA
					NA		NA		NA		NA		NA		NA		NA		NA		NA		NA		NA		NA		NA		NA		NA		NA		NA		NA		NA		NA		NA		NA		NA
					NA		NA		NA		NA		NA		NA		NA		NA		NA		NA		NA		NA		NA		NA		NA		NA		NA		NA		NA		NA		NA		NA		NA
					NA		NA		NA		NA		NA		NA		NA		NA		NA		NA		NA		NA		NA		NA		NA		NA		NA		NA		NA		NA		NA		NA		NA
					NA		NA		NA		NA		NA		NA		NA		NA		NA		NA		NA		NA		NA		NA		NA		NA		NA		NA		NA		NA		NA		NA		NA
					NA		NA		NA		NA		NA		NA		NA		NA		NA		NA		NA		NA		NA		NA		NA		NA		NA		NA		NA		NA		NA		NA		NA
					NA		NA		NA		NA		NA		NA		NA		NA		NA		NA		NA		NA		NA		NA		NA		NA		NA		NA		NA		NA		NA		NA		NA
					NA		NA		NA		NA		NA		NA		NA		NA		NA		NA		NA		NA		NA		NA		NA		NA		NA		NA		NA		NA		NA		NA		NA
					NA		NA		NA		NA		NA		NA		NA		NA		NA		NA		NA		NA		NA		NA		NA		NA		NA		NA		NA		NA		NA		NA		NA
					NA		NA		NA		NA		NA		NA		NA		NA		NA		NA		NA		NA		NA		NA		NA		NA		NA		NA		NA		NA		NA		NA		NA
					NA		NA		NA		NA		NA		NA		NA		NA		NA		NA		NA		NA		NA		NA		NA		NA		NA		NA		NA		NA		NA		NA		NA
					NA		NA		NA		NA		NA		NA		NA		NA		NA		NA		NA		NA		NA		NA		NA		NA		NA		NA		NA		NA		NA		NA		NA
					NA		NA		NA		NA		NA		NA		NA		NA		NA		NA		NA		NA		NA		NA		NA		NA		NA		NA		NA		NA		NA		NA		NA
					NA		NA		NA		NA		NA		NA		NA		NA		NA		NA		NA		NA		NA		NA		NA		NA		NA		NA		NA		NA		NA		NA		NA
					NA		NA		NA		NA		NA		NA		NA		NA		NA		NA		NA		NA		NA		NA		NA		NA		NA		NA		NA		NA		NA		NA		NA
					NA		NA		NA		NA		NA		NA		NA		NA		NA		NA		NA		NA		NA		NA		NA		NA		NA		NA		NA		NA		NA		NA		NA
					NA		NA		NA		NA		NA		NA		NA		NA		NA		NA		NA		NA		NA		NA		NA		NA		NA		NA		NA		NA		NA		NA		NA
					NA		NA		NA		NA		NA		NA		NA		NA		NA		NA		NA		NA		NA		NA		NA		NA		NA		NA		NA		NA		NA		NA		NA
					NA		NA		NA		NA		NA		NA		NA		NA		NA		NA		NA		NA		NA		NA		NA		NA		NA		NA		NA		NA		NA		NA		NA
					NA		NA		NA		NA		NA		NA		NA		NA		NA		NA		NA		NA		NA		NA		NA		NA		NA		NA		NA		NA		NA		NA		NA
					NA		NA		NA		NA		NA		NA		NA		NA		NA		NA		NA		NA		NA		NA		NA		NA		NA		NA		NA		NA		NA		NA		NA
					NA		NA		NA		NA		NA		NA		NA		NA		NA		NA		NA		NA		NA		NA		NA		NA		NA		NA		NA		NA		NA		NA		NA
					NA		NA		NA		NA		NA		NA		NA		NA		NA		NA		NA		NA		NA		NA		NA		NA		NA		NA		NA		NA		NA		NA		NA
					NA		NA		NA		NA		NA		NA		NA		NA		NA		NA		NA		NA		NA		NA		NA		NA		NA		NA		NA		NA		NA		NA		NA
					NA		NA		NA		NA		NA		NA		NA		NA		NA		NA		NA		NA		NA		NA		NA		NA		NA		NA		NA		NA		NA		NA		NA
					NA		NA		NA		NA		NA		NA		NA		NA		NA		NA		NA		NA		NA		NA		NA		NA		NA		NA		NA		NA		NA		NA		NA
					NA		NA		NA		NA		NA		NA		NA		NA		NA		NA		NA		NA		NA		NA		NA		NA		NA		NA		NA		NA		NA		NA		NA
					NA		NA		NA		NA		NA		NA		NA		NA		NA		NA		NA		NA		NA		NA		NA		NA		NA		NA		NA		NA		NA		NA		NA
					NA		NA		NA		NA		NA		NA		NA		NA		NA		NA		NA		NA		NA		NA		NA		NA		NA		NA		NA		NA		NA		NA		NA
					NA		NA		NA		NA		NA		NA		NA		NA		NA		NA		NA		NA		NA		NA		NA		NA		NA		NA		NA		NA		NA		NA		NA
					NA		NA		NA		NA		NA		NA		NA		NA		NA		NA		NA		NA		NA		NA		NA		NA		NA		NA		NA		NA		NA		NA		NA
					NA		NA		NA		NA		NA		NA		NA		NA		NA		NA		NA		NA		NA		NA		NA		NA		NA		NA		NA		NA		NA		NA		NA
					NA		NA		NA		NA		NA		NA		NA		NA		NA		NA		NA		NA		NA		NA		NA		NA		NA		NA		NA		NA		NA		NA		NA
					NA		NA		NA		NA		NA		NA		NA		NA		NA		NA		NA		NA		NA		NA		NA		NA		NA		NA		NA		NA		NA		NA		NA
					NA		NA		NA		NA		NA		NA		NA		NA		NA		NA		NA		NA		NA		NA		NA		NA		NA		NA		NA		NA		NA		NA		NA
					NA		NA		NA		NA		NA		NA		NA		NA		NA		NA		NA		NA		NA		NA		NA		NA		NA		NA		NA		NA		NA		NA		NA
					NA		NA		NA		NA		NA		NA		NA		NA		NA		NA		NA		NA		NA		NA		NA		NA		NA		NA		NA		NA		NA		NA		NA
					NA		NA		NA		NA		NA		NA		NA		NA		NA		NA		NA		NA		NA		NA		NA		NA		NA		NA		NA		NA		NA		NA		NA
					NA		NA		NA		NA		NA		NA		NA		NA		NA		NA		NA		NA		NA		NA		NA		NA		NA		NA		NA		NA		NA		NA		NA
					NA		NA		NA		NA		NA		NA		NA		NA		NA		NA		NA		NA		NA		NA		NA		NA		NA		NA		NA		NA		NA		NA		NA
					NA		NA		NA		NA		NA		NA		NA		NA		NA		NA		NA		NA		NA		NA		NA		NA		NA		NA		NA		NA		NA		NA		NA
					NA		NA		NA		NA		NA		NA		NA		NA		NA		NA		NA		NA		NA		NA		NA		NA		NA		NA		NA		NA		NA		NA		NA
					NA		NA		NA		NA		NA		NA		NA		NA		NA		NA		NA		NA		NA		NA		NA		NA		NA		NA		NA		NA		NA		NA		NA
					NA		NA		NA		NA		NA		NA		NA		NA		NA		NA		NA		NA		NA		NA		NA		NA		NA		NA		NA		NA		NA		NA		NA
					NA		NA		NA		NA		NA		NA		NA		NA		NA		NA		NA		NA		NA		NA		NA		NA		NA		NA		NA		NA		NA		NA		NA
					NA		NA		NA		NA		NA		NA		NA		NA		NA		NA		NA		NA		NA		NA		NA		NA		NA		NA		NA		NA		NA		NA		NA
					NA		NA		NA		NA		NA		NA		NA		NA		NA		NA		NA		NA		NA		NA		NA		NA		NA		NA		NA		NA		NA		NA		NA
					NA		NA		NA		NA		NA		NA		NA		NA		NA		NA		NA		NA		NA		NA		NA		NA		NA		NA		NA		NA		NA		NA		NA
					NA		NA		NA		NA		NA		NA		NA		NA		NA		NA		NA		NA		NA		NA		NA		NA		NA		NA		NA		NA		NA		NA		NA
					NA		NA		NA		NA		NA		NA		NA		NA		NA		NA		NA		NA		NA		NA		NA		NA		NA		NA		NA		NA		NA		NA		NA
					NA		NA		NA		NA		NA		NA		NA		NA		NA		NA		NA		NA		NA		NA		NA		NA		NA		NA		NA		NA		NA		NA		NA
					NA		NA		NA		NA		NA		NA		NA		NA		NA		NA		NA		NA		NA		NA		NA		NA		NA		NA		NA		NA		NA		NA		NA
					NA		NA		NA		NA		NA		NA		NA		NA		NA		NA		NA		NA		NA		NA		NA		NA		NA		NA		NA		NA		NA		NA		NA
					NA		NA		NA		NA		NA		NA		NA		NA		NA		NA		NA		NA		NA		NA		NA		NA		NA		NA		NA		NA		NA		NA		NA
					NA		NA		NA		NA		NA		NA		NA		NA		NA		NA		NA		NA		NA		NA		NA		NA		NA		NA		NA		NA		NA		NA		NA
					NA		NA		NA		NA		NA		NA		NA		NA		NA		NA		NA		NA		NA		NA		NA		NA		NA		NA		NA		NA		NA		NA		NA
					NA		NA		NA		NA		NA		NA		NA		NA		NA		NA		NA		NA		NA		NA		NA		NA		NA		NA		NA		NA		NA		NA		NA
					NA		NA		NA		NA		NA		NA		NA		NA		NA		NA		NA		NA		NA		NA		NA		NA		NA		NA		NA		NA		NA		NA		NA
					NA		NA		NA		NA		NA		NA		NA		NA		NA		NA		NA		NA		NA		NA		NA		NA		NA		NA		NA		NA		NA		NA		NA
					NA		NA		NA		NA		NA		NA		NA		NA		NA		NA		NA		NA		NA		NA		NA		NA		NA		NA		NA		NA		NA		NA		NA
					NA		NA		NA		NA		NA		NA		NA		NA		NA		NA		NA		NA		NA		NA		NA		NA		NA		NA		NA		NA		NA		NA		NA
					NA		NA		NA		NA		NA		NA		NA		NA		NA		NA		NA		NA		NA		NA		NA		NA		NA		NA		NA		NA		NA		NA		NA
					NA		NA		NA		NA		NA		NA		NA		NA		NA		NA		NA		NA		NA		NA		NA		NA		NA		NA		NA		NA		NA		NA		NA
					NA		NA		NA		NA		NA		NA		NA		NA		NA		NA		NA		NA		NA		NA		NA		NA		NA		NA		NA		NA		NA		NA		NA
					NA		NA		NA		NA		NA		NA		NA		NA		NA		NA		NA		NA		NA		NA		NA		NA		NA		NA		NA		NA		NA		NA		NA
					NA		NA		NA		NA		NA		NA		NA		NA		NA		NA		NA		NA		NA		NA		NA		NA		NA		NA		NA		NA		NA		NA		NA
					NA		NA		NA		NA		NA		NA		NA		NA		NA		NA		NA		NA		NA		NA		NA		NA		NA		NA		NA		NA		NA		NA		NA
					NA		NA		NA		NA		NA		NA		NA		NA		NA		NA		NA		NA		NA		NA		NA		NA		NA		NA		NA		NA		NA		NA		NA
					NA		NA		NA		NA		NA		NA		NA		NA		NA		NA		NA		NA		NA		NA		NA		NA		NA		NA		NA		NA		NA		NA		NA
					NA		NA		NA		NA		NA		NA		NA		NA		NA		NA		NA		NA		NA		NA		NA		NA		NA		NA		NA		NA		NA		NA		NA
					NA		NA		NA		NA		NA		NA		NA		NA		NA		NA		NA		NA		NA		NA		NA		NA		NA		NA		NA		NA		NA		NA		NA
					NA		NA		NA		NA		NA		NA		NA		NA		NA		NA		NA		NA		NA		NA		NA		NA		NA		NA		NA		NA		NA		NA		NA
					NA		NA		NA		NA		NA		NA		NA		NA		NA		NA		NA		NA		NA		NA		NA		NA		NA		NA		NA		NA		NA		NA		NA
					NA		NA		NA		NA		NA		NA		NA		NA		NA		NA		NA		NA		NA		NA		NA		NA		NA		NA		NA		NA		NA		NA		NA
					NA		NA		NA		NA		NA		NA		NA		NA		NA		NA		NA		NA		NA		NA		NA		NA		NA		NA		NA		NA		NA		NA		NA
					NA		NA		NA		NA		NA		NA		NA		NA		NA		NA		NA		NA		NA		NA		NA		NA		NA		NA		NA		NA		NA		NA		NA
					NA		NA		NA		NA		NA		NA		NA		NA		NA		NA		NA		NA		NA		NA		NA		NA		NA		NA		NA		NA		NA		NA		NA
					NA		NA		NA		NA		NA		NA		NA		NA		NA		NA		NA		NA		NA		NA		NA		NA		NA		NA		NA		NA		NA		NA		NA
					NA		NA		NA		NA		NA		NA		NA		NA		NA		NA		NA		NA		NA		NA		NA		NA		NA		NA		NA		NA		NA		NA		NA
					NA		NA		NA		NA		NA		NA		NA		NA		NA		NA		NA		NA		NA		NA		NA		NA		NA		NA		NA		NA		NA		NA		NA
					NA		NA		NA		NA		NA		NA		NA		NA		NA		NA		NA		NA		NA		NA		NA		NA		NA		NA		NA		NA		NA		NA		NA
					NA		NA		NA		NA		NA		NA		NA		NA		NA		NA		NA		NA		NA		NA		NA		NA		NA		NA		NA		NA		NA		NA		NA
					NA		NA		NA		NA		NA		NA		NA		NA		NA		NA		NA		NA		NA		NA		NA		NA		NA		NA		NA		NA		NA		NA		NA
					NA		NA		NA		NA		NA		NA		NA		NA		NA		NA		NA		NA		NA		NA		NA		NA		NA		NA		NA		NA		NA		NA		NA
					NA		NA		NA		NA		NA		NA		NA		NA		NA		NA		NA		NA		NA		NA		NA		NA		NA		NA		NA		NA		NA		NA		NA
					NA		NA		NA		NA		NA		NA		NA		NA		NA		NA		NA		NA		NA		NA		NA		NA		NA		NA		NA		NA		NA		NA		NA
					NA		NA		NA		NA		NA		NA		NA		NA		NA		NA		NA		NA		NA		NA		NA		NA		NA		NA		NA		NA		NA		NA		NA
					NA		NA		NA		NA		NA		NA		NA		NA		NA		NA		NA		NA		NA		NA		NA		NA		NA		NA		NA		NA		NA		NA		NA
					NA		NA		NA		NA		NA		NA		NA		NA		NA		NA		NA		NA		NA		NA		NA		NA		NA		NA		NA		NA		NA		NA		NA
					NA		NA		NA		NA		NA		NA		NA		NA		NA		NA		NA		NA		NA		NA		NA		NA		NA		NA		NA		NA		NA		NA		NA
					NA		NA		NA		NA		NA		NA		NA		NA		NA		NA		NA		NA		NA		NA		NA		NA		NA		NA		NA		NA		NA		NA		NA
					NA		NA		NA		NA		NA		NA		NA		NA		NA		NA		NA		NA		NA		NA		NA		NA		NA		NA		NA		NA		NA		NA		NA
					NA		NA		NA		NA		NA		NA		NA		NA		NA		NA		NA		NA		NA		NA		NA		NA		NA		NA		NA		NA		NA		NA		NA
					NA		NA		NA		NA		NA		NA		NA		NA		NA		NA		NA		NA		NA		NA		NA		NA		NA		NA		NA		NA		NA		NA		NA
					NA		NA		NA		NA		NA		NA		NA		NA		NA		NA		NA		NA		NA		NA		NA		NA		NA		NA		NA		NA		NA		NA		NA
					NA		NA		NA		NA		NA		NA		NA		NA		NA		NA		NA		NA		NA		NA		NA		NA		NA		NA		NA		NA		NA		NA		NA
					NA		NA		NA		NA		NA		NA		NA		NA		NA		NA		NA		NA		NA		NA		NA		NA		NA		NA		NA		NA		NA		NA		NA
					NA		NA		NA		NA		NA		NA		NA		NA		NA		NA		NA		NA		NA		NA		NA		NA		NA		NA		NA		NA		NA		NA		NA
					NA		NA		NA		NA		NA		NA		NA		NA		NA		NA		NA		NA		NA		NA		NA		NA		NA		NA		NA		NA		NA		NA		NA
					NA		NA		NA		NA		NA		NA		NA		NA		NA		NA		NA		NA		NA		NA		NA		NA		NA		NA		NA		NA		NA		NA		NA
					NA		NA		NA		NA		NA		NA		NA		NA		NA		NA		NA		NA		NA		NA		NA		NA		NA		NA		NA		NA		NA		NA		NA
					NA		NA		NA		NA		NA		NA		NA		NA		NA		NA		NA		NA		NA		NA		NA		NA		NA		NA		NA		NA		NA		NA		NA
					NA		NA		NA		NA		NA		NA		NA		NA		NA		NA		NA		NA		NA		NA		NA		NA		NA		NA		NA		NA		NA		NA		NA
					NA		NA		NA		NA		NA		NA		NA		NA		NA		NA		NA		NA		NA		NA		NA		NA		NA		NA		NA		NA		NA		NA		NA
					NA		NA		NA		NA		NA		NA		NA		NA		NA		NA		NA		NA		NA		NA		NA		NA		NA		NA		NA		NA		NA		NA		NA
					NA		NA		NA		NA		NA		NA		NA		NA		NA		NA		NA		NA		NA		NA		NA		NA		NA		NA		NA		NA		NA		NA		NA
					NA		NA		NA		NA		NA		NA		NA		NA		NA		NA		NA		NA		NA		NA		NA		NA		NA		NA		NA		NA		NA		NA		NA
					NA		NA		NA		NA		NA		NA		NA		NA		NA		NA		NA		NA		NA		NA		NA		NA		NA		NA		NA		NA		NA		NA		NA
					NA		NA		NA		NA		NA		NA		NA		NA		NA		NA		NA		NA		NA		NA		NA		NA		NA		NA		NA		NA		NA		NA		NA
					NA		NA		NA		NA		NA		NA		NA		NA		NA		NA		NA		NA		NA		NA		NA		NA		NA		NA		NA		NA		NA		NA		NA
					NA		NA		NA		NA		NA		NA		NA		NA		NA		NA		NA		NA		NA		NA		NA		NA		NA		NA		NA		NA		NA		NA		NA
					NA		NA		NA		NA		NA		NA		NA		NA		NA		NA		NA		NA		NA		NA		NA		NA		NA		NA		NA		NA		NA		NA		NA
					NA		NA		NA		NA		NA		NA		NA		NA		NA		NA		NA		NA		NA		NA		NA		NA		NA		NA		NA		NA		NA		NA		NA
					NA		NA		NA		NA		NA		NA		NA		NA		NA		NA		NA		NA		NA		NA		NA		NA		NA		NA		NA		NA		NA		NA		NA
					NA		NA		NA		NA		NA		NA		NA		NA		NA		NA		NA		NA		NA		NA		NA		NA		NA		NA		NA		NA		NA		NA		NA
					NA		NA		NA		NA		NA		NA		NA		NA		NA		NA		NA		NA		NA		NA		NA		NA		NA		NA		NA		NA		NA		NA		NA
					NA		NA		NA		NA		NA		NA		NA		NA		NA		NA		NA		NA		NA		NA		NA		NA		NA		NA		NA		NA		NA		NA		NA
					NA		NA		NA		NA		NA		NA		NA		NA		NA		NA		NA		NA		NA		NA		NA		NA		NA		NA		NA		NA		NA		NA		NA
					NA		NA		NA		NA		NA		NA		NA		NA		NA		NA		NA		NA		NA		NA		NA		NA		NA		NA		NA		NA		NA		NA		NA
					NA		NA		NA		NA		NA		NA		NA		NA		NA		NA		NA		NA		NA		NA		NA		NA		NA		NA		NA		NA		NA		NA		NA
					NA		NA		NA		NA		NA		NA		NA		NA		NA		NA		NA		NA		NA		NA		NA		NA		NA		NA		NA		NA		NA		NA		NA
					NA		NA		NA		NA		NA		NA		NA		NA		NA		NA		NA		NA		NA		NA		NA		NA		NA		NA		NA		NA		NA		NA		NA
					NA		NA		NA		NA		NA		NA		NA		NA		NA		NA		NA		NA		NA		NA		NA		NA		NA		NA		NA		NA		NA		NA		NA
					NA		NA		NA		NA		NA		NA		NA		NA		NA		NA		NA		NA		NA		NA		NA		NA		NA		NA		NA		NA		NA		NA		NA
					NA		NA		NA		NA		NA		NA		NA		NA		NA		NA		NA		NA		NA		NA		NA		NA		NA		NA		NA		NA		NA		NA		NA
					NA		NA		NA		NA		NA		NA		NA		NA		NA		NA		NA		NA		NA		NA		NA		NA		NA		NA		NA		NA		NA		NA		NA
					NA		NA		NA		NA		NA		NA		NA		NA		NA		NA		NA		NA		NA		NA		NA		NA		NA		NA		NA		NA		NA		NA		NA
					NA		NA		NA		NA		NA		NA		NA		NA		NA		NA		NA		NA		NA		NA		NA		NA		NA		NA		NA		NA		NA		NA		NA
					NA		NA		NA		NA		NA		NA		NA		NA		NA		NA		NA		NA		NA		NA		NA		NA		NA		NA		NA		NA		NA		NA		NA
					NA		NA		NA		NA		NA		NA		NA		NA		NA		NA		NA		NA		NA		NA		NA		NA		NA		NA		NA		NA		NA		NA		NA
					NA		NA		NA		NA		NA		NA		NA		NA		NA		NA		NA		NA		NA		NA		NA		NA		NA		NA		NA		NA		NA		NA		NA
					NA		NA		NA		NA		NA		NA		NA		NA		NA		NA		NA		NA		NA		NA		NA		NA		NA		NA		NA		NA		NA		NA		NA
					NA		NA		NA		NA		NA		NA		NA		NA		NA		NA		NA		NA		NA		NA		NA		NA		NA		NA		NA		NA		NA		NA		NA
					NA		NA		NA		NA		NA		NA		NA		NA		NA		NA		NA		NA		NA		NA		NA		NA		NA		NA		NA		NA		NA		NA		NA
					NA		NA		NA		NA		NA		NA		NA		NA		NA		NA		NA		NA		NA		NA		NA		NA		NA		NA		NA		NA		NA		NA		NA
					NA		NA		NA		NA		NA		NA		NA		NA		NA		NA		NA		NA		NA		NA		NA		NA		NA		NA		NA		NA		NA		NA		NA
					NA		NA		NA		NA		NA		NA		NA		NA		NA		NA		NA		NA		NA		NA		NA		NA		NA		NA		NA		NA		NA		NA		NA
					NA		NA		NA		NA		NA		NA		NA		NA		NA		NA		NA		NA		NA		NA		NA		NA		NA		NA		NA		NA		NA		NA		NA
					NA		NA		NA		NA		NA		NA		NA		NA		NA		NA		NA		NA		NA		NA		NA		NA		NA		NA		NA		NA		NA		NA		NA
					NA		NA		NA		NA		NA		NA		NA		NA		NA		NA		NA		NA		NA		NA		NA		NA		NA		NA		NA		NA		NA		NA		NA
					NA		NA		NA		NA		NA		NA		NA		NA		NA		NA		NA		NA		NA		NA		NA		NA		NA		NA		NA		NA		NA		NA		NA
					NA		NA		NA		NA		NA		NA		NA		NA		NA		NA		NA		NA		NA		NA		NA		NA		NA		NA		NA		NA		NA		NA		NA
					NA		NA		NA		NA		NA		NA		NA		NA		NA		NA		NA		NA		NA		NA		NA		NA		NA		NA		NA		NA		NA		NA		NA
					NA		NA		NA		NA		NA		NA		NA		NA		NA		NA		NA		NA		NA		NA		NA		NA		NA		NA		NA		NA		NA		NA		NA
					NA		NA		NA		NA		NA		NA		NA		NA		NA		NA		NA		NA		NA		NA		NA		NA		NA		NA		NA		NA		NA		NA		NA
					NA		NA		NA		NA		NA		NA		NA		NA		NA		NA		NA		NA		NA		NA		NA		NA		NA		NA		NA		NA		NA		NA		NA
					NA		NA		NA		NA		NA		NA		NA		NA		NA		NA		NA		NA		NA		NA		NA		NA		NA		NA		NA		NA		NA		NA		NA
					NA		NA		NA		NA		NA		NA		NA		NA		NA		NA		NA		NA		NA		NA		NA		NA		NA		NA		NA		NA		NA		NA		NA
					NA		NA		NA		NA		NA		NA		NA		NA		NA		NA		NA		NA		NA		NA		NA		NA		NA		NA		NA		NA		NA		NA		NA
					NA		NA		NA		NA		NA		NA		NA		NA		NA		NA		NA		NA		NA		NA		NA		NA		NA		NA		NA		NA		NA		NA		NA
					NA		NA		NA		NA		NA		NA		NA		NA		NA		NA		NA		NA		NA		NA		NA		NA		NA		NA		NA		NA		NA		NA		NA
					NA		NA		NA		NA		NA		NA		NA		NA		NA		NA		NA		NA		NA		NA		NA		NA		NA		NA		NA		NA		NA		NA		NA
					NA		NA		NA		NA		NA		NA		NA		NA		NA		NA		NA		NA		NA		NA		NA		NA		NA		NA		NA		NA		NA		NA		NA
					NA		NA		NA		NA		NA		NA		NA		NA		NA		NA		NA		NA		NA		NA		NA		NA		NA		NA		NA		NA		NA		NA		NA
					NA		NA		NA		NA		NA		NA		NA		NA		NA		NA		NA		NA		NA		NA		NA		NA		NA		NA		NA		NA		NA		NA		NA
					NA		NA		NA		NA		NA		NA		NA		NA		NA		NA		NA		NA		NA		NA		NA		NA		NA		NA		NA		NA		NA		NA		NA
					NA		NA		NA		NA		NA		NA		NA		NA		NA		NA		NA		NA		NA		NA		NA		NA		NA		NA		NA		NA		NA		NA		NA
					NA		NA		NA		NA		NA		NA		NA		NA		NA		NA		NA		NA		NA		NA		NA		NA		NA		NA		NA		NA		NA		NA		NA
					NA		NA		NA		NA		NA		NA		NA		NA		NA		NA		NA		NA		NA		NA		NA		NA		NA		NA		NA		NA		NA		NA		NA
					NA		NA		NA		NA		NA		NA		NA		NA		NA		NA		NA		NA		NA		NA		NA		NA		NA		NA		NA		NA		NA		NA		NA
					NA		NA		NA		NA		NA		NA		NA		NA		NA		NA		NA		NA		NA		NA		NA		NA		NA		NA		NA		NA		NA		NA		NA
					NA		NA		NA		NA		NA		NA		NA		NA		NA		NA		NA		NA		NA		NA		NA		NA		NA		NA		NA		NA		NA		NA		NA
					NA		NA		NA		NA		NA		NA		NA		NA		NA		NA		NA		NA		NA		NA		NA		NA		NA		NA		NA		NA		NA		NA		NA
					NA		NA		NA		NA		NA		NA		NA		NA		NA		NA		NA		NA		NA		NA		NA		NA		NA		NA		NA		NA		NA		NA		NA
					NA		NA		NA		NA		NA		NA		NA		NA		NA		NA		NA		NA		NA		NA		NA		NA		NA		NA		NA		NA		NA		NA		NA
					NA		NA		NA		NA		NA		NA		NA		NA		NA		NA		NA		NA		NA		NA		NA		NA		NA		NA		NA		NA		NA		NA		NA
					NA		NA		NA		NA		NA		NA		NA		NA		NA		NA		NA		NA		NA		NA		NA		NA		NA		NA		NA		NA		NA		NA		NA
					NA		NA		NA		NA		NA		NA		NA		NA		NA		NA		NA		NA		NA		NA		NA		NA		NA		NA		NA		NA		NA		NA		NA
					NA		NA		NA		NA		NA		NA		NA		NA		NA		NA		NA		NA		NA		NA		NA		NA		NA		NA		NA		NA		NA		NA		NA
					NA		NA		NA		NA		NA		NA		NA		NA		NA		NA		NA		NA		NA		NA		NA		NA		NA		NA		NA		NA		NA		NA		NA
					NA		NA		NA		NA		NA		NA		NA		NA		NA		NA		NA		NA		NA		NA		NA		NA		NA		NA		NA		NA		NA		NA		NA
					NA		NA		NA		NA		NA		NA		NA		NA		NA		NA		NA		NA		NA		NA		NA		NA		NA		NA		NA		NA		NA		NA		NA
					NA		NA		NA		NA		NA		NA		NA		NA		NA		NA		NA		NA		NA		NA		NA		NA		NA		NA		NA		NA		NA		NA		NA
					NA		NA		NA		NA		NA		NA		NA		NA		NA		NA		NA		NA		NA		NA		NA		NA		NA		NA		NA		NA		NA		NA		NA
					NA		NA		NA		NA		NA		NA		NA		NA		NA		NA		NA		NA		NA		NA		NA		NA		NA		NA		NA		NA		NA		NA		NA
					NA		NA		NA		NA		NA		NA		NA		NA		NA		NA		NA		NA		NA		NA		NA		NA		NA		NA		NA		NA		NA		NA		NA
					NA		NA		NA		NA		NA		NA		NA		NA		NA		NA		NA		NA		NA		NA		NA		NA		NA		NA		NA		NA		NA		NA		NA
					NA		NA		NA		NA		NA		NA		NA		NA		NA		NA		NA		NA		NA		NA		NA		NA		NA		NA		NA		NA		NA		NA		NA
					NA		NA		NA		NA		NA		NA		NA		NA		NA		NA		NA		NA		NA		NA		NA		NA		NA		NA		NA		NA		NA		NA		NA
					NA		NA		NA		NA		NA		NA		NA		NA		NA		NA		NA		NA		NA		NA		NA		NA		NA		NA		NA		NA		NA		NA		NA
					NA		NA		NA		NA		NA		NA		NA		NA		NA		NA		NA		NA		NA		NA		NA		NA		NA		NA		NA		NA		NA		NA		NA
					NA		NA		NA		NA		NA		NA		NA		NA		NA		NA		NA		NA		NA		NA		NA		NA		NA		NA		NA		NA		NA		NA		NA
					NA		NA		NA		NA		NA		NA		NA		NA		NA		NA		NA		NA		NA		NA		NA		NA		NA		NA		NA		NA		NA		NA		NA
					NA		NA		NA		NA		NA		NA		NA		NA		NA		NA		NA		NA		NA		NA		NA		NA		NA		NA		NA		NA		NA		NA		NA
					NA		NA		NA		NA		NA		NA		NA		NA		NA		NA		NA		NA		NA		NA		NA		NA		NA		NA		NA		NA		NA		NA		NA
					NA		NA		NA		NA		NA		NA		NA		NA		NA		NA		NA		NA		NA		NA		NA		NA		NA		NA		NA		NA		NA		NA		NA
					NA		NA		NA		NA		NA		NA		NA		NA		NA		NA		NA		NA		NA		NA		NA		NA		NA		NA		NA		NA		NA		NA		NA
					NA		NA		NA		NA		NA		NA		NA		NA		NA		NA		NA		NA		NA		NA		NA		NA		NA		NA		NA		NA		NA		NA		NA
					NA		NA		NA		NA		NA		NA		NA		NA		NA		NA		NA		NA		NA		NA		NA		NA		NA		NA		NA		NA		NA		NA		NA
					NA		NA		NA		NA		NA		NA		NA		NA		NA		NA		NA		NA		NA		NA		NA		NA		NA		NA		NA		NA		NA		NA		NA
					NA		NA		NA		NA		NA		NA		NA		NA		NA		NA		NA		NA		NA		NA		NA		NA		NA		NA		NA		NA		NA		NA		NA
					NA		NA		NA		NA		NA		NA		NA		NA		NA		NA		NA		NA		NA		NA		NA		NA		NA		NA		NA		NA		NA		NA		NA
					NA		NA		NA		NA		NA		NA		NA		NA		NA		NA		NA		NA		NA		NA		NA		NA		NA		NA		NA		NA		NA		NA		NA
					NA		NA		NA		NA		NA		NA		NA		NA		NA		NA		NA		NA		NA		NA		NA		NA		NA		NA		NA		NA		NA		NA		NA
					NA		NA		NA		NA		NA		NA		NA		NA		NA		NA		NA		NA		NA		NA		NA		NA		NA		NA		NA		NA		NA		NA		NA
					NA		NA		NA		NA		NA		NA		NA		NA		NA		NA		NA		NA		NA		NA		NA		NA		NA		NA		NA		NA		NA		NA		NA
					NA		NA		NA		NA		NA		NA		NA		NA		NA		NA		NA		NA		NA		NA		NA		NA		NA		NA		NA		NA		NA		NA		NA
					NA		NA		NA		NA		NA		NA		NA		NA		NA		NA		NA		NA		NA		NA		NA		NA		NA		NA		NA		NA		NA		NA		NA
					NA		NA		NA		NA		NA		NA		NA		NA		NA		NA		NA		NA		NA		NA		NA		NA		NA		NA		NA		NA		NA		NA		NA
					NA		NA		NA		NA		NA		NA		NA		NA		NA		NA		NA		NA		NA		NA		NA		NA		NA		NA		NA		NA		NA		NA		NA
					NA		NA		NA		NA		NA		NA		NA		NA		NA		NA		NA		NA		NA		NA		NA		NA		NA		NA		NA		NA		NA		NA		NA
					NA		NA		NA		NA		NA		NA		NA		NA		NA		NA		NA		NA		NA		NA		NA		NA		NA		NA		NA		NA		NA		NA		NA
					NA		NA		NA		NA		NA		NA		NA		NA		NA		NA		NA		NA		NA		NA		NA		NA		NA		NA		NA		NA		NA		NA		NA
					NA		NA		NA		NA		NA		NA		NA		NA		NA		NA		NA		NA		NA		NA		NA		NA		NA		NA		NA		NA		NA		NA		NA
					NA		NA		NA		NA		NA		NA		NA		NA		NA		NA		NA		NA		NA		NA		NA		NA		NA		NA		NA		NA		NA		NA		NA
					NA		NA		NA		NA		NA		NA		NA		NA		NA		NA		NA		NA		NA		NA		NA		NA		NA		NA		NA		NA		NA		NA		NA
					NA		NA		NA		NA		NA		NA		NA		NA		NA		NA		NA		NA		NA		NA		NA		NA		NA		NA		NA		NA		NA		NA		NA
					NA		NA		NA		NA		NA		NA		NA		NA		NA		NA		NA		NA		NA		NA		NA		NA		NA		NA		NA		NA		NA		NA		NA
					NA		NA		NA		NA		NA		NA		NA		NA		NA		NA		NA		NA		NA		NA		NA		NA		NA		NA		NA		NA		NA		NA		NA
					NA		NA		NA		NA		NA		NA		NA		NA		NA		NA		NA		NA		NA		NA		NA		NA		NA		NA		NA		NA		NA		NA		NA
					NA		NA		NA		NA		NA		NA		NA		NA		NA		NA		NA		NA		NA		NA		NA		NA		NA		NA		NA		NA		NA		NA		NA
					NA		NA		NA		NA		NA		NA		NA		NA		NA		NA		NA		NA		NA		NA		NA		NA		NA		NA		NA		NA		NA		NA		NA
					NA		NA		NA		NA		NA		NA		NA		NA		NA		NA		NA		NA		NA		NA		NA		NA		NA		NA		NA		NA		NA		NA		NA
					NA		NA		NA		NA		NA		NA		NA		NA		NA		NA		NA		NA		NA		NA		NA		NA		NA		NA		NA		NA		NA		NA		NA
					NA		NA		NA		NA		NA		NA		NA		NA		NA		NA		NA		NA		NA		NA		NA		NA		NA		NA		NA		NA		NA		NA		NA
					NA		NA		NA		NA		NA		NA		NA		NA		NA		NA		NA		NA		NA		NA		NA		NA		NA		NA		NA		NA		NA		NA		NA
					NA		NA		NA		NA		NA		NA		NA		NA		NA		NA		NA		NA		NA		NA		NA		NA		NA		NA		NA		NA		NA		NA		NA
					NA		NA		NA		NA		NA		NA		NA		NA		NA		NA		NA		NA		NA		NA		NA		NA		NA		NA		NA		NA		NA		NA		NA
					NA		NA		NA		NA		NA		NA		NA		NA		NA		NA		NA		NA		NA		NA		NA		NA		NA		NA		NA		NA		NA		NA		NA
					NA		NA		NA		NA		NA		NA		NA		NA		NA		NA		NA		NA		NA		NA		NA		NA		NA		NA		NA		NA		NA		NA		NA
					NA		NA		NA		NA		NA		NA		NA		NA		NA		NA		NA		NA		NA		NA		NA		NA		NA		NA		NA		NA		NA		NA		NA
					NA		NA		NA		NA		NA		NA		NA		NA		NA		NA		NA		NA		NA		NA		NA		NA		NA		NA		NA		NA		NA		NA		NA
					NA		NA		NA		NA		NA		NA		NA		NA		NA		NA		NA		NA		NA		NA		NA		NA		NA		NA		NA		NA		NA		NA		NA
					NA		NA		NA		NA		NA		NA		NA		NA		NA		NA		NA		NA		NA		NA		NA		NA		NA		NA		NA		NA		NA		NA		NA
					NA		NA		NA		NA		NA		NA		NA		NA		NA		NA		NA		NA		NA		NA		NA		NA		NA		NA		NA		NA		NA		NA		NA
					NA		NA		NA		NA		NA		NA		NA		NA		NA		NA		NA		NA		NA		NA		NA		NA		NA		NA		NA		NA		NA		NA		NA
					NA		NA		NA		NA		NA		NA		NA		NA		NA		NA		NA		NA		NA		NA		NA		NA		NA		NA		NA		NA		NA		NA		NA
					NA		NA		NA		NA		NA		NA		NA		NA		NA		NA		NA		NA		NA		NA		NA		NA		NA		NA		NA		NA		NA		NA		NA
					NA		NA		NA		NA		NA		NA		NA		NA		NA		NA		NA		NA		NA		NA		NA		NA		NA		NA		NA		NA		NA		NA		NA
					NA		NA		NA		NA		NA		NA		NA		NA		NA		NA		NA		NA		NA		NA		NA		NA		NA		NA		NA		NA		NA		NA		NA
					NA		NA		NA		NA		NA		NA		NA		NA		NA		NA		NA		NA		NA		NA		NA		NA		NA		NA		NA		NA		NA		NA		NA
					NA		NA		NA		NA		NA		NA		NA		NA		NA		NA		NA		NA		NA		NA		NA		NA		NA		NA		NA		NA		NA		NA		NA
					NA		NA		NA		NA		NA		NA		NA		NA		NA		NA		NA		NA		NA		NA		NA		NA		NA		NA		NA		NA		NA		NA		NA
					NA		NA		NA		NA		NA		NA		NA		NA		NA		NA		NA		NA		NA		NA		NA		NA		NA		NA		NA		NA		NA		NA		NA
					NA		NA		NA		NA		NA		NA		NA		NA		NA		NA		NA		NA		NA		NA		NA		NA		NA		NA		NA		NA		NA		NA		NA
					NA		NA		NA		NA		NA		NA		NA		NA		NA		NA		NA		NA		NA		NA		NA		NA		NA		NA		NA		NA		NA		NA		NA
					NA		NA		NA		NA		NA		NA		NA		NA		NA		NA		NA		NA		NA		NA		NA		NA		NA		NA		NA		NA		NA		NA		NA
					NA		NA		NA		NA		NA		NA		NA		NA		NA		NA		NA		NA		NA		NA		NA		NA		NA		NA		NA		NA		NA		NA		NA
					NA		NA		NA		NA		NA		NA		NA		NA		NA		NA		NA		NA		NA		NA		NA		NA		NA		NA		NA		NA		NA		NA		NA
					NA		NA		NA		NA		NA		NA		NA		NA		NA		NA		NA		NA		NA		NA		NA		NA		NA		NA		NA		NA		NA		NA		NA
					NA		NA		NA		NA		NA		NA		NA		NA		NA		NA		NA		NA		NA		NA		NA		NA		NA		NA		NA		NA		NA		NA		NA
					NA		NA		NA		NA		NA		NA		NA		NA		NA		NA		NA		NA		NA		NA		NA		NA		NA		NA		NA		NA		NA		NA		NA
					NA		NA		NA		NA		NA		NA		NA		NA		NA		NA		NA		NA		NA		NA		NA		NA		NA		NA		NA		NA		NA		NA		NA
					NA		NA		NA		NA		NA		NA		NA		NA		NA		NA		NA		NA		NA		NA		NA		NA		NA		NA		NA		NA		NA		NA		NA
					NA		NA		NA		NA		NA		NA		NA		NA		NA		NA		NA		NA		NA		NA		NA		NA		NA		NA		NA		NA		NA		NA		NA
					NA		NA		NA		NA		NA		NA		NA		NA		NA		NA		NA		NA		NA		NA		NA		NA		NA		NA		NA		NA		NA		NA		NA
					NA		NA		NA		NA		NA		NA		NA		NA		NA		NA		NA		NA		NA		NA		NA		NA		NA		NA		NA		NA		NA		NA		NA
					NA		NA		NA		NA		NA		NA		NA		NA		NA		NA		NA		NA		NA		NA		NA		NA		NA		NA		NA		NA		NA		NA		NA
					NA		NA		NA		NA		NA		NA		NA		NA		NA		NA		NA		NA		NA		NA		NA		NA		NA		NA		NA		NA		NA		NA		NA
					NA		NA		NA		NA		NA		NA		NA		NA		NA		NA		NA		NA		NA		NA		NA		NA		NA		NA		NA		NA		NA		NA		NA
					NA		NA		NA		NA		NA		NA		NA		NA		NA		NA		NA		NA		NA		NA		NA		NA		NA		NA		NA		NA		NA		NA		NA
					NA		NA		NA		NA		NA		NA		NA		NA		NA		NA		NA		NA		NA		NA		NA		NA		NA		NA		NA		NA		NA		NA		NA
					NA		NA		NA		NA		NA		NA		NA		NA		NA		NA		NA		NA		NA		NA		NA		NA		NA		NA		NA		NA		NA		NA		NA
					NA		NA		NA		NA		NA		NA		NA		NA		NA		NA		NA		NA		NA		NA		NA		NA		NA		NA		NA		NA		NA		NA		NA
					NA		NA		NA		NA		NA		NA		NA		NA		NA		NA		NA		NA		NA		NA		NA		NA		NA		NA		NA		NA		NA		NA		NA
					NA		NA		NA		NA		NA		NA		NA		NA		NA		NA		NA		NA		NA		NA		NA		NA		NA		NA		NA		NA		NA		NA		NA
					NA		NA		NA		NA		NA		NA		NA		NA		NA		NA		NA		NA		NA		NA		NA		NA		NA		NA		NA		NA		NA		NA		NA
					NA		NA		NA		NA		NA		NA		NA		NA		NA		NA		NA		NA		NA		NA		NA		NA		NA		NA		NA		NA		NA		NA		NA
					NA		NA		NA		NA		NA		NA		NA		NA		NA		NA		NA		NA		NA		NA		NA		NA		NA		NA		NA		NA		NA		NA		NA
					NA		NA		NA		NA		NA		NA		NA		NA		NA		NA		NA		NA		NA		NA		NA		NA		NA		NA		NA		NA		NA		NA		NA
					NA		NA		NA		NA		NA		NA		NA		NA		NA		NA		NA		NA		NA		NA		NA		NA		NA		NA		NA		NA		NA		NA		NA
					NA		NA		NA		NA		NA		NA		NA		NA		NA		NA		NA		NA		NA		NA		NA		NA		NA		NA		NA		NA		NA		NA		NA
					NA		NA		NA		NA		NA		NA		NA		NA		NA		NA		NA		NA		NA		NA		NA		NA		NA		NA		NA		NA		NA		NA		NA
					NA		NA		NA		NA		NA		NA		NA		NA		NA		NA		NA		NA		NA		NA		NA		NA		NA		NA		NA		NA		NA		NA		NA
					NA		NA		NA		NA		NA		NA		NA		NA		NA		NA		NA		NA		NA		NA		NA		NA		NA		NA		NA		NA		NA		NA		NA
					NA		NA		NA		NA		NA		NA		NA		NA		NA		NA		NA		NA		NA		NA		NA		NA		NA		NA		NA		NA		NA		NA		NA
					NA		NA		NA		NA		NA		NA		NA		NA		NA		NA		NA		NA		NA		NA		NA		NA		NA		NA		NA		NA		NA		NA		NA
					NA		NA		NA		NA		NA		NA		NA		NA		NA		NA		NA		NA		NA		NA		NA		NA		NA		NA		NA		NA		NA		NA		NA
					NA		NA		NA		NA		NA		NA		NA		NA		NA		NA		NA		NA		NA		NA		NA		NA		NA		NA		NA		NA		NA		NA		NA
					NA		NA		NA		NA		NA		NA		NA		NA		NA		NA		NA		NA		NA		NA		NA		NA		NA		NA		NA		NA		NA		NA		NA
					NA		NA		NA		NA		NA		NA		NA		NA		NA		NA		NA		NA		NA		NA		NA		NA		NA		NA		NA		NA		NA		NA		NA
					NA		NA		NA		NA		NA		NA		NA		NA		NA		NA		NA		NA		NA		NA		NA		NA		NA		NA		NA		NA		NA		NA		NA
					NA		NA		NA		NA		NA		NA		NA		NA		NA		NA		NA		NA		NA		NA		NA		NA		NA		NA		NA		NA		NA		NA		NA
					NA		NA		NA		NA		NA		NA		NA		NA		NA		NA		NA		NA		NA		NA		NA		NA		NA		NA		NA		NA		NA		NA		NA
					NA		NA		NA		NA		NA		NA		NA		NA		NA		NA		NA		NA		NA		NA		NA		NA		NA		NA		NA		NA		NA		NA		NA
					NA		NA		NA		NA		NA		NA		NA		NA		NA		NA		NA		NA		NA		NA		NA		NA		NA		NA		NA		NA		NA		NA		NA
					NA		NA		NA		NA		NA		NA		NA		NA		NA		NA		NA		NA		NA		NA		NA		NA		NA		NA		NA		NA		NA		NA		NA
					NA		NA		NA		NA		NA		NA		NA		NA		NA		NA		NA		NA		NA		NA		NA		NA		NA		NA		NA		NA		NA		NA		NA
					NA		NA		NA		NA		NA		NA		NA		NA		NA		NA		NA		NA		NA		NA		NA		NA		NA		NA		NA		NA		NA		NA		NA
					NA		NA		NA		NA		NA		NA		NA		NA		NA		NA		NA		NA		NA		NA		NA		NA		NA		NA		NA		NA		NA		NA		NA
					NA		NA		NA		NA		NA		NA		NA		NA		NA		NA		NA		NA		NA		NA		NA		NA		NA		NA		NA		NA		NA		NA		NA
					NA		NA		NA		NA		NA		NA		NA		NA		NA		NA		NA		NA		NA		NA		NA		NA		NA		NA		NA		NA		NA		NA		NA
					NA		NA		NA		NA		NA		NA		NA		NA		NA		NA		NA		NA		NA		NA		NA		NA		NA		NA		NA		NA		NA		NA		NA
					NA		NA		NA		NA		NA		NA		NA		NA		NA		NA		NA		NA		NA		NA		NA		NA		NA		NA		NA		NA		NA		NA		NA
					NA		NA		NA		NA		NA		NA		NA		NA		NA		NA		NA		NA		NA		NA		NA		NA		NA		NA		NA		NA		NA		NA		NA
					NA		NA		NA		NA		NA		NA		NA		NA		NA		NA		NA		NA		NA		NA		NA		NA		NA		NA		NA		NA		NA		NA		NA
					NA		NA		NA		NA		NA		NA		NA		NA		NA		NA		NA		NA		NA		NA		NA		NA		NA		NA		NA		NA		NA		NA		NA
					NA		NA		NA		NA		NA		NA		NA		NA		NA		NA		NA		NA		NA		NA		NA		NA		NA		NA		NA		NA		NA		NA		NA
					NA		NA		NA		NA		NA		NA		NA		NA		NA		NA		NA		NA		NA		NA		NA		NA		NA		NA		NA		NA		NA		NA		NA
					NA		NA		NA		NA		NA		NA		NA		NA		NA		NA		NA		NA		NA		NA		NA		NA		NA		NA		NA		NA		NA		NA		NA
					NA		NA		NA		NA		NA		NA		NA		NA		NA		NA		NA		NA		NA		NA		NA		NA		NA		NA		NA		NA		NA		NA		NA
					NA		NA		NA		NA		NA		NA		NA		NA		NA		NA		NA		NA		NA		NA		NA		NA		NA		NA		NA		NA		NA		NA		NA
					NA		NA		NA		NA		NA		NA		NA		NA		NA		NA		NA		NA		NA		NA		NA		NA		NA		NA		NA		NA		NA		NA		NA
					NA		NA		NA		NA		NA		NA		NA		NA		NA		NA		NA		NA		NA		NA		NA		NA		NA		NA		NA		NA		NA		NA		NA
					NA		NA		NA		NA		NA		NA		NA		NA		NA		NA		NA		NA		NA		NA		NA		NA		NA		NA		NA		NA		NA		NA		NA
					NA		NA		NA		NA		NA		NA		NA		NA		NA		NA		NA		NA		NA		NA		NA		NA		NA		NA		NA		NA		NA		NA		NA
					NA		NA		NA		NA		NA		NA		NA		NA		NA		NA		NA		NA		NA		NA		NA		NA		NA		NA		NA		NA		NA		NA		NA
					NA		NA		NA		NA		NA		NA		NA		NA		NA		NA		NA		NA		NA		NA		NA		NA		NA		NA		NA		NA		NA		NA		NA
					NA		NA		NA		NA		NA		NA		NA		NA		NA		NA		NA		NA		NA		NA		NA		NA		NA		NA		NA		NA		NA		NA		NA
					NA		NA		NA		NA		NA		NA		NA		NA		NA		NA		NA		NA		NA		NA		NA		NA		NA		NA		NA		NA		NA		NA		NA
					NA		NA		NA		NA		NA		NA		NA		NA		NA		NA		NA		NA		NA		NA		NA		NA		NA		NA		NA		NA		NA		NA		NA
					NA		NA		NA		NA		NA		NA		NA		NA		NA		NA		NA		NA		NA		NA		NA		NA		NA		NA		NA		NA		NA		NA		NA
					NA		NA		NA		NA		NA		NA		NA		NA		NA		NA		NA		NA		NA		NA		NA		NA		NA		NA		NA		NA		NA		NA		NA
					NA		NA		NA		NA		NA		NA		NA		NA		NA		NA		NA		NA		NA		NA		NA		NA		NA		NA		NA		NA		NA		NA		NA
					NA		NA		NA		NA		NA		NA		NA		NA		NA		NA		NA		NA		NA		NA		NA		NA		NA		NA		NA		NA		NA		NA		NA
					NA		NA		NA		NA		NA		NA		NA		NA		NA		NA		NA		NA		NA		NA		NA		NA		NA		NA		NA		NA		NA		NA		NA
					NA		NA		NA		NA		NA		NA		NA		NA		NA		NA		NA		NA		NA		NA		NA		NA		NA		NA		NA		NA		NA		NA		NA
					NA		NA		NA		NA		NA		NA		NA		NA		NA		NA		NA		NA		NA		NA		NA		NA		NA		NA		NA		NA		NA		NA		NA
					NA		NA		NA		NA		NA		NA		NA		NA		NA		NA		NA		NA		NA		NA		NA		NA		NA		NA		NA		NA		NA		NA		NA
					NA		NA		NA		NA		NA		NA		NA		NA		NA		NA		NA		NA		NA		NA		NA		NA		NA		NA		NA		NA		NA		NA		NA
					NA		NA		NA		NA		NA		NA		NA		NA		NA		NA		NA		NA		NA		NA		NA		NA		NA		NA		NA		NA		NA		NA		NA
					NA		NA		NA		NA		NA		NA		NA		NA		NA		NA		NA		NA		NA		NA		NA		NA		NA		NA		NA		NA		NA		NA		NA
					NA		NA		NA		NA		NA		NA		NA		NA		NA		NA		NA		NA		NA		NA		NA		NA		NA		NA		NA		NA		NA		NA		NA
					NA		NA		NA		NA		NA		NA		NA		NA		NA		NA		NA		NA		NA		NA		NA		NA		NA		NA		NA		NA		NA		NA		NA
					NA		NA		NA		NA		NA		NA		NA		NA		NA		NA		NA		NA		NA		NA		NA		NA		NA		NA		NA		NA		NA		NA		NA
					NA		NA		NA		NA		NA		NA		NA		NA		NA		NA		NA		NA		NA		NA		NA		NA		NA		NA		NA		NA		NA		NA		NA
					NA		NA		NA		NA		NA		NA		NA		NA		NA		NA		NA		NA		NA		NA		NA		NA		NA		NA		NA		NA		NA		NA		NA
					NA		NA		NA		NA		NA		NA		NA		NA		NA		NA		NA		NA		NA		NA		NA		NA		NA		NA		NA		NA		NA		NA		NA
					NA		NA		NA		NA		NA		NA		NA		NA		NA		NA		NA		NA		NA		NA		NA		NA		NA		NA		NA		NA		NA		NA		NA
					NA		NA		NA		NA		NA		NA		NA		NA		NA		NA		NA		NA		NA		NA		NA		NA		NA		NA		NA		NA		NA		NA		NA
					NA		NA		NA		NA		NA		NA		NA		NA		NA		NA		NA		NA		NA		NA		NA		NA		NA		NA		NA		NA		NA		NA		NA
					NA		NA		NA		NA		NA		NA		NA		NA		NA		NA		NA		NA		NA		NA		NA		NA		NA		NA		NA		NA		NA		NA		NA
					NA		NA		NA		NA		NA		NA		NA		NA		NA		NA		NA		NA		NA		NA		NA		NA		NA		NA		NA		NA		NA		NA		NA
					NA		NA		NA		NA		NA		NA		NA		NA		NA		NA		NA		NA		NA		NA		NA		NA		NA		NA		NA		NA		NA		NA		NA
					NA		NA		NA		NA		NA		NA		NA		NA		NA		NA		NA		NA		NA		NA		NA		NA		NA		NA		NA		NA		NA		NA		NA
					NA		NA		NA		NA		NA		NA		NA		NA		NA		NA		NA		NA		NA		NA		NA		NA		NA		NA		NA		NA		NA		NA		NA
					NA		NA		NA		NA		NA		NA		NA		NA		NA		NA		NA		NA		NA		NA		NA		NA		NA		NA		NA		NA		NA		NA		NA
					NA		NA		NA		NA		NA		NA		NA		NA		NA		NA		NA		NA		NA		NA		NA		NA		NA		NA		NA		NA		NA		NA		NA
					NA		NA		NA		NA		NA		NA		NA		NA		NA		NA		NA		NA		NA		NA		NA		NA		NA		NA		NA		NA		NA		NA		NA
					NA		NA		NA		NA		NA		NA		NA		NA		NA		NA		NA		NA		NA		NA		NA		NA		NA		NA		NA		NA		NA		NA		NA
					NA		NA		NA		NA		NA		NA		NA		NA		NA		NA		NA		NA		NA		NA		NA		NA		NA		NA		NA		NA		NA		NA		NA
					NA		NA		NA		NA		NA		NA		NA		NA		NA		NA		NA		NA		NA		NA		NA		NA		NA		NA		NA		NA		NA		NA		NA
					NA		NA		NA		NA		NA		NA		NA		NA		NA		NA		NA		NA		NA		NA		NA		NA		NA		NA		NA		NA		NA		NA		NA
					NA		NA		NA		NA		NA		NA		NA		NA		NA		NA		NA		NA		NA		NA		NA		NA		NA		NA		NA		NA		NA		NA		NA
					NA		NA		NA		NA		NA		NA		NA		NA		NA		NA		NA		NA		NA		NA		NA		NA		NA		NA		NA		NA		NA		NA		NA
					NA		NA		NA		NA		NA		NA		NA		NA		NA		NA		NA		NA		NA		NA		NA		NA		NA		NA		NA		NA		NA		NA		NA
					NA		NA		NA		NA		NA		NA		NA		NA		NA		NA		NA		NA		NA		NA		NA		NA		NA		NA		NA		NA		NA		NA		NA
					NA		NA		NA		NA		NA		NA		NA		NA		NA		NA		NA		NA		NA		NA		NA		NA		NA		NA		NA		NA		NA		NA		NA
					NA		NA		NA		NA		NA		NA		NA		NA		NA		NA		NA		NA		NA		NA		NA		NA		NA		NA		NA		NA		NA		NA		NA
					NA		NA		NA		NA		NA		NA		NA		NA		NA		NA		NA		NA		NA		NA		NA		NA		NA		NA		NA		NA		NA		NA		NA
					NA		NA		NA		NA		NA		NA		NA		NA		NA		NA		NA		NA		NA		NA		NA		NA		NA		NA		NA		NA		NA		NA		NA
					NA		NA		NA		NA		NA		NA		NA		NA		NA		NA		NA		NA		NA		NA		NA		NA		NA		NA		NA		NA		NA		NA		NA
					NA		NA		NA		NA		NA		NA		NA		NA		NA		NA		NA		NA		NA		NA		NA		NA		NA		NA		NA		NA		NA		NA		NA
					NA		NA		NA		NA		NA		NA		NA		NA		NA		NA		NA		NA		NA		NA		NA		NA		NA		NA		NA		NA		NA		NA		NA
					NA		NA		NA		NA		NA		NA		NA		NA		NA		NA		NA		NA		NA		NA		NA		NA		NA		NA		NA		NA		NA		NA		NA
					NA		NA		NA		NA		NA		NA		NA		NA		NA		NA		NA		NA		NA		NA		NA		NA		NA		NA		NA		NA		NA		NA		NA
					NA		NA		NA		NA		NA		NA		NA		NA		NA		NA		NA		NA		NA		NA		NA		NA		NA		NA		NA		NA		NA		NA		NA
					NA		NA		NA		NA		NA		NA		NA		NA		NA		NA		NA		NA		NA		NA		NA		NA		NA		NA		NA		NA		NA		NA		NA
					NA		NA		NA		NA		NA		NA		NA		NA		NA		NA		NA		NA		NA		NA		NA		NA		NA		NA		NA		NA		NA		NA		NA
					NA		NA		NA		NA		NA		NA		NA		NA		NA		NA		NA		NA		NA		NA		NA		NA		NA		NA		NA		NA		NA		NA		NA
					NA		NA		NA		NA		NA		NA		NA		NA		NA		NA		NA		NA		NA		NA		NA		NA		NA		NA		NA		NA		NA		NA		NA
					NA		NA		NA		NA		NA		NA		NA		NA		NA		NA		NA		NA		NA		NA		NA		NA		NA		NA		NA		NA		NA		NA		NA
					NA		NA		NA		NA		NA		NA		NA		NA		NA		NA		NA		NA		NA		NA		NA		NA		NA		NA		NA		NA		NA		NA		NA
					NA		NA		NA		NA		NA		NA		NA		NA		NA		NA		NA		NA		NA		NA		NA		NA		NA		NA		NA		NA		NA		NA		NA
					NA		NA		NA		NA		NA		NA		NA		NA		NA		NA		NA		NA		NA		NA		NA		NA		NA		NA		NA		NA		NA		NA		NA
					NA		NA		NA		NA		NA		NA		NA		NA		NA		NA		NA		NA		NA		NA		NA		NA		NA		NA		NA		NA		NA		NA		NA
					NA		NA		NA		NA		NA		NA		NA		NA		NA		NA		NA		NA		NA		NA		NA		NA		NA		NA		NA		NA		NA		NA		NA
					NA		NA		NA		NA		NA		NA		NA		NA		NA		NA		NA		NA		NA		NA		NA		NA		NA		NA		NA		NA		NA		NA		NA
					NA		NA		NA		NA		NA		NA		NA		NA		NA		NA		NA		NA		NA		NA		NA		NA		NA		NA		NA		NA		NA		NA		NA
					NA		NA		NA		NA		NA		NA		NA		NA		NA		NA		NA		NA		NA		NA		NA		NA		NA		NA		NA		NA		NA		NA		NA
					NA		NA		NA		NA		NA		NA		NA		NA		NA		NA		NA		NA		NA		NA		NA		NA		NA		NA		NA		NA		NA		NA		NA
					NA		NA		NA		NA		NA		NA		NA		NA		NA		NA		NA		NA		NA		NA		NA		NA		NA		NA		NA		NA		NA		NA		NA
					NA		NA		NA		NA		NA		NA		NA		NA		NA		NA		NA		NA		NA		NA		NA		NA		NA		NA		NA		NA		NA		NA		NA
					NA		NA		NA		NA		NA		NA		NA		NA		NA		NA		NA		NA		NA		NA		NA		NA		NA		NA		NA		NA		NA		NA		NA
					NA		NA		NA		NA		NA		NA		NA		NA		NA		NA		NA		NA		NA		NA		NA		NA		NA		NA		NA		NA		NA		NA		NA
					NA		NA		NA		NA		NA		NA		NA		NA		NA		NA		NA		NA		NA		NA		NA		NA		NA		NA		NA		NA		NA		NA		NA
					NA		NA		NA		NA		NA		NA		NA		NA		NA		NA		NA		NA		NA		NA		NA		NA		NA		NA		NA		NA		NA		NA		NA
					NA		NA		NA		NA		NA		NA		NA		NA		NA		NA		NA		NA		NA		NA		NA		NA		NA		NA		NA		NA		NA		NA		NA
					NA		NA		NA		NA		NA		NA		NA		NA		NA		NA		NA		NA		NA		NA		NA		NA		NA		NA		NA		NA		NA		NA		NA
					NA		NA		NA		NA		NA		NA		NA		NA		NA		NA		NA		NA		NA		NA		NA		NA		NA		NA		NA		NA		NA		NA		NA
					NA		NA		NA		NA		NA		NA		NA		NA		NA		NA		NA		NA		NA		NA		NA		NA		NA		NA		NA		NA		NA		NA		NA
					NA		NA		NA		NA		NA		NA		NA		NA		NA		NA		NA		NA		NA		NA		NA		NA		NA		NA		NA		NA		NA		NA		NA
					NA		NA		NA		NA		NA		NA		NA		NA		NA		NA		NA		NA		NA		NA		NA		NA		NA		NA		NA		NA		NA		NA		NA
					NA		NA		NA		NA		NA		NA		NA		NA		NA		NA		NA		NA		NA		NA		NA		NA		NA		NA		NA		NA		NA		NA		NA
					NA		NA		NA		NA		NA		NA		NA		NA		NA		NA		NA		NA		NA		NA		NA		NA		NA		NA		NA		NA		NA		NA		NA
					NA		NA		NA		NA		NA		NA		NA		NA		NA		NA		NA		NA		NA		NA		NA		NA		NA		NA		NA		NA		NA		NA		NA
					NA		NA		NA		NA		NA		NA		NA		NA		NA		NA		NA		NA		NA		NA		NA		NA		NA		NA		NA		NA		NA		NA		NA
					NA		NA		NA		NA		NA		NA		NA		NA		NA		NA		NA		NA		NA		NA		NA		NA		NA		NA		NA		NA		NA		NA		NA
					NA		NA		NA		NA		NA		NA		NA		NA		NA		NA		NA		NA		NA		NA		NA		NA		NA		NA		NA		NA		NA		NA		NA
					NA		NA		NA		NA		NA		NA		NA		NA		NA		NA		NA		NA		NA		NA		NA		NA		NA		NA		NA		NA		NA		NA		NA
					NA		NA		NA		NA		NA		NA		NA		NA		NA		NA		NA		NA		NA		NA		NA		NA		NA		NA		NA		NA		NA		NA		NA
					NA		NA		NA		NA		NA		NA		NA		NA		NA		NA		NA		NA		NA		NA		NA		NA		NA		NA		NA		NA		NA		NA		NA
					NA		NA		NA		NA		NA		NA		NA		NA		NA		NA		NA		NA		NA		NA		NA		NA		NA		NA		NA		NA		NA		NA		NA
					NA		NA		NA		NA		NA		NA		NA		NA		NA		NA		NA		NA		NA		NA		NA		NA		NA		NA		NA		NA		NA		NA		NA
					NA		NA		NA		NA		NA		NA		NA		NA		NA		NA		NA		NA		NA		NA		NA		NA		NA		NA		NA		NA		NA		NA		NA
					NA		NA		NA		NA		NA		NA		NA		NA		NA		NA		NA		NA		NA		NA		NA		NA		NA		NA		NA		NA		NA		NA		NA
					NA		NA		NA		NA		NA		NA		NA		NA		NA		NA		NA		NA		NA		NA		NA		NA		NA		NA		NA		NA		NA		NA		NA
					NA		NA		NA		NA		NA		NA		NA		NA		NA		NA		NA		NA		NA		NA		NA		NA		NA		NA		NA		NA		NA		NA		NA
					NA		NA		NA		NA		NA		NA		NA		NA		NA		NA		NA		NA		NA		NA		NA		NA		NA		NA		NA		NA		NA		NA		NA
					NA		NA		NA		NA		NA		NA		NA		NA		NA		NA		NA		NA		NA		NA		NA		NA		NA		NA		NA		NA		NA		NA		NA
					NA		NA		NA		NA		NA		NA		NA		NA		NA		NA		NA		NA		NA		NA		NA		NA		NA		NA		NA		NA		NA		NA		NA
					NA		NA		NA		NA		NA		NA		NA		NA		NA		NA		NA		NA		NA		NA		NA		NA		NA		NA		NA		NA		NA		NA		NA
					NA		NA		NA		NA		NA		NA		NA		NA		NA		NA		NA		NA		NA		NA		NA		NA		NA		NA		NA		NA		NA		NA		NA
					NA		NA		NA		NA		NA		NA		NA		NA		NA		NA		NA		NA		NA		NA		NA		NA		NA		NA		NA		NA		NA		NA		NA
					NA		NA		NA		NA		NA		NA		NA		NA		NA		NA		NA		NA		NA		NA		NA		NA		NA		NA		NA		NA		NA		NA		NA
					NA		NA		NA		NA		NA		NA		NA		NA		NA		NA		NA		NA		NA		NA		NA		NA		NA		NA		NA		NA		NA		NA		NA
					NA		NA		NA		NA		NA		NA		NA		NA		NA		NA		NA		NA		NA		NA		NA		NA		NA		NA		NA		NA		NA		NA		NA
					NA		NA		NA		NA		NA		NA		NA		NA		NA		NA		NA		NA		NA		NA		NA		NA		NA		NA		NA		NA		NA		NA		NA
					NA		NA		NA		NA		NA		NA		NA		NA		NA		NA		NA		NA		NA		NA		NA		NA		NA		NA		NA		NA		NA		NA		NA
					NA		NA		NA		NA		NA		NA		NA		NA		NA		NA		NA		NA		NA		NA		NA		NA		NA		NA		NA		NA		NA		NA		NA
					NA		NA		NA		NA		NA		NA		NA		NA		NA		NA		NA		NA		NA		NA		NA		NA		NA		NA		NA		NA		NA		NA		NA
					NA		NA		NA		NA		NA		NA		NA		NA		NA		NA		NA		NA		NA		NA		NA		NA		NA		NA		NA		NA		NA		NA		NA
					NA		NA		NA		NA		NA		NA		NA		NA		NA		NA		NA		NA		NA		NA		NA		NA		NA		NA		NA		NA		NA		NA		NA
					NA		NA		NA		NA		NA		NA		NA		NA		NA		NA		NA		NA		NA		NA		NA		NA		NA		NA		NA		NA		NA		NA		NA
					NA		NA		NA		NA		NA		NA		NA		NA		NA		NA		NA		NA		NA		NA		NA		NA		NA		NA		NA		NA		NA		NA		NA
					NA		NA		NA		NA		NA		NA		NA		NA		NA		NA		NA		NA		NA		NA		NA		NA		NA		NA		NA		NA		NA		NA		NA
					NA		NA		NA		NA		NA		NA		NA		NA		NA		NA		NA		NA		NA		NA		NA		NA		NA		NA		NA		NA		NA		NA		NA
					NA		NA		NA		NA		NA		NA		NA		NA		NA		NA		NA		NA		NA		NA		NA		NA		NA		NA		NA		NA		NA		NA		NA
					NA		NA		NA		NA		NA		NA		NA		NA		NA		NA		NA		NA		NA		NA		NA		NA		NA		NA		NA		NA		NA		NA		NA
					NA		NA		NA		NA		NA		NA		NA		NA		NA		NA		NA		NA		NA		NA		NA		NA		NA		NA		NA		NA		NA		NA		NA
					NA		NA		NA		NA		NA		NA		NA		NA		NA		NA		NA		NA		NA		NA		NA		NA		NA		NA		NA		NA		NA		NA		NA
					NA		NA		NA		NA		NA		NA		NA		NA		NA		NA		NA		NA		NA		NA		NA		NA		NA		NA		NA		NA		NA		NA		NA
					NA		NA		NA		NA		NA		NA		NA		NA		NA		NA		NA		NA		NA		NA		NA		NA		NA		NA		NA		NA		NA		NA		NA
					NA		NA		NA		NA		NA		NA		NA		NA		NA		NA		NA		NA		NA		NA		NA		NA		NA		NA		NA		NA		NA		NA		NA
					NA		NA		NA		NA		NA		NA		NA		NA		NA		NA		NA		NA		NA		NA		NA		NA		NA		NA		NA		NA		NA		NA		NA
[truncated: 29 more columns]

## Sheet: aa-values-all
group	sample_ID	data_file	L-Alanine	L-Arginine	L-Asparagine	L-Aspartic Acid	L-Cysteine	L-Cystine	L-Glutamic acid	L-Glutamine	L-Glycine	L-Histidine	L-Isoleucine	L-Leucine	L-Lysine	L-Methionine	L-Phenylalanine	L-Proline	L-Serine	L-Threonine	Tryptamine	L-Tryptophane	Tyramine	L-Tyrosine	L-Valine
L2	MET1-26 L2 R1	met1-26 l2 r1_ba4_01_54725.d.xms	0.0479919	0.029	0	0.01	0	0.295	0.063	0.339	2.325	0.092	0.042	0	0.112	0	0.052	0.51	0.007	0.384	0	0.038	0	0.034	0.077
EL3	MET1-26 EL3 R1	met1-26 el3 r1_ba5_01_54726.d.xms	1.14538	1.533	0.471	1.256	0.008	0.143	1.913	13.235	4.713	2.773	2.159	3.478	4.619	9.483	0.98	19.015	1.045	2.671	0	0.735	0	1.816	2.853
LL3	MET1-26 LL3 R1	met1-26 ll3 r1_ba6_01_54727.d.xms	0.561373	0.738	0.086	0.151	0.008	0.166	0.693	2.355	3.503	0.761	0.264	0.418	0.8	3.151	0.499	5.562	0.248	0.854	0	0.221	0	0.477	0.417
PW	MET1-26 PW R1	met1-26 pw r1_ba7_01_54728.d.xms	2.36405	0.448	2.229	1.103	0.003	0.028	4.982	12.774	15.392	3.296	0.711	1.157	3.263	2.26	0.472	20.919	1.82	1.876	0	2.007	0	4.76	1.683
PB	MET1-26 PB R1	met1-26 pb r1_ba8_01_54729.d.xms	0.166459	0.175	0.045	0.053	0.003	0.19	0.536	0.8	1.907	0.152	0.069	0.131	0.24	0.067	0.059	0.481	0.068	0.329	0	0.219	0	1.333	0.064
NW	MET1-26 NW R1	met1-26 nw r1_bb1_01_54730.d.xms	0.0899034	0.094	0.02	0.033	0	0.223	0.175	0.363	2.697	0.041	0.015	0.043	0.111	0.069	0.025	0.253	0.053	0.286	0	0.018	0	0.389	0.051
OW	MET1-26 W R1	met1-26 w r1_bb2_01_54731.d.xms	2.55746	1.84	0.277	0.893	0	0	3.191	7.436	3.401	1.579	0.486	0.543	2.357	2.403	0.237	8.731	1.115	0.888	0.034	0.183	0.242	0.341	0.926
L2	MET1-26 L2 R2	met1-26 l2 r2_bb3_01_54734.d.xms	0.0906654	0.206	0.039	0.094	0	0.175	0.169	0.792	1.767	0.178	0.072	0.089	0.297	0.139	0.052	0.981	0.157	0.373	0	0.072	0	0.105	0.067
EL3	MET1-26 EL3 R2	met1-26 el3 r2_bb4_01_54735.d.xms	0.188897	0.348	0.094	0.284	0.002	0.197	0.397	2.069	2.123	0.717	0.388	0.53	0.861	1.186	0.238	3.799	0.055	0.713	0	0.186	0	0.269	0.463
LL3	MET1-26 LL3 R2	met1-26 ll3 r2_bb5_01_54736.d.xms	0.658316	0.888	0.07	0.546	0.014	0.205	0.8	3.215	3.25	0.96	0.323	0.646	1.125	4.124	0.621	8.193	0.144	1.038	0	0.336	0	0.45	0.451
PW	MET1-26 PW R2	met1-26 pw r2_bb6_01_54737.d.xms	0.100539	0.062	0.093	0.044	0	0.195	0.307	0.858	4.266	0.244	0.03	0.055	0.269	0.147	0.019	1.082	0.076	0.456	0.001	0.098	0	0.192	0.094
PB	MET1-26 PB R2	met1-26 pb r2_bb7_01_54738.d.xms	0.0922864	0.062	0	0.055	0	0.242	0.202	0.229	2.749	0.073	0.017	0.048	0.063	0.036	0.024	0.141	0.13	0.349	0	0.071	0	0.676	0.042
NW	MET1-26 NW R2	met1-26 nw r2_bb8_01_54739.d.xms	0.087532	0.108	0.021	0.041	0	0.239	0.13	0.312	2.982	0.052	0.026	0.05	0.104	0.11	0.026	0.232	0.063	0.372	0	0.016	0	0.164	0.041
OW	MET1-26 W R2	met1-26 w r2_bc1_01_54740.d.xms	0.0470528	0.061	0	0.015	0	0.238	0.072	0.146	2.294	0.039	0.007	0.006	0.036	0.067	0.003	0.193	0.023	0.263	0.001	0.001	0.01	0.01	0.013
L2	MET5-26 L2 R3	met5-26 l2 r3_bc2_01_54743.d.xms	0.0801448	0.054	0	0.067	0	0.186	0.116	0.352	1.982	0.168	0.112	0.165	0.122	0.392	0.065	0.826	0.146	0.357	0	0.043	0	0.059	0.12
EL3	MET5-26 EL3 R3	met5-26 el3 r3_bc3_01_54744.d.xms	8.49781	3.88	0.999	1.96	0.016	0	5.792	27.468	18.818	6.782	5.216	7.555	9.491	39.134	3.334	55.293	4.944	7.781	0	2.21	0	3.302	7.01
LL3	MET5-26 LL3 R3	met5-26 ll3 r3_bc4_01_54745.d.xms	8.39306	7.385	1.84	1.565	0.008	0	10.887	31.593	30.975	13.512	3.282	7.493	8.401	46.467	5.79	136.506	6.073	11.607	0	3.091	0	7.208	10.122
PW	MET5-26 PW R3	met5-26 pw r3_bc5_01_54746.d.xms	0.802316	0.287	0.484	0.287	0.003	0.139	1.449	3.413	9.12	0.84	0.183	0.31	1.02	0.608	0.12	5.356	0.732	0.792	0	0.584	0	0.829	0.501
PB	MET5-26 PB R3	met5-26 pb r3_bc6_01_54747.d.xms	0.253204	0.222	0.059	0.114	0	0.187	0.594	0.753	11.141	0.18	0.052	0.104	0.228	0.096	0.059	0.437	0.132	0.362	0	0.148	0	1.165	0.08
NW	MET5-26 NW R3	met5-26 nw r3_bc7_01_54748.d.xms	0.245201	0.204	0.046	0.117	0	0.171	0.227	0.406	4.1	0.141	0.049	0.1	0.143	0.211	0.064	0.365	0.396	0.448	0.001	0.022	0	0.313	0.114
OW	MET5-26 W R3	met5-26 w r3_bc8_01_54749.d.xms	0.0523821	0.066	0	0.018	0	0.233	0.107	0.19	3.686	0.029	0.01	0.015	0.051	0.088	0.006	0.272	0.054	0.305	0	0.004	0	0.018	0.031
L2	MET5-26 L2 R4	met5-26 l2 r4_bd1_01_54752.d.xms	1.74778	1.196	0.428	1.726	0	0	2.689	11.437	2.786	2.794	1.736	2.758	4.602	7.135	0.661	21.331	1.368	2.195	0	0.954	0	0.55	1.973
EL3	MET5-26 EL3 R4	met5-26 el3 r4_bd2_01_54753.d.xms	0.482205	0.219	0.073	0.331	0	0.182	0.238	0.453	4.212	0.441	0.133	0.192	0.182	0.785	0.121	1.532	1.354	0.583	0	0.053	0	0.148	0.206
LL3	MET5-26 LL3 R4	met5-26 ll3 r4_bd3_01_54754.d.xms	15.1518	7.349	1.885	5.198	0.016	0	8.698	57.092	37.375	11.823	9.977	14.98	17.972	76.673	10.191	149.69	9.639	15.572	0	3.713	0	8.978	15.301
PW	MET5-26 PW R4	met5-26 pw r4_bd4_01_54755.d.xms	0.648797	0.24	0.399	0.179	0	0.167	1.216	3.07	5.679	0.683	0.204	0.307	0.962	0.571	0.089	4.21	0.456	0.666	0	0.299	0	0.265	0.532
PB	MET5-26 PB R4	met5-26 pb r4_bd5_01_54756.d.xms	0.111581	0.082	0	0.049	0	0.208	0.174	0.271	2.856	0.061	0.017	0.032	0.079	0	0.02	0.127	0.098	0.28	0	0.053	0	0.371	0.02
NW	MET5-26 NW R4	met5-26 nw r4_bd6_01_54757.d.xms	0.0623211	0.073	0.02	0.03	0	0.269	0.118	0.283	1.85	0.023	0.016	0.037	0.095	0.091	0.016	0.209	0.015	0.273	0	0.008	0	0.154	0.036
OW	MET5-26 W R4	met5-26 w r4_bd7_01_54758.d.xms	0.0778709	0.136	0.022	0.041	0	0.192	0.164	0.303	2.833	0.064	0.036	0.049	0.095	0.197	0.017	0.515	0.039	0.324	0.002	0.018	0.012	0.029	0.063
L2	MET5-26 L2 R5	met5-26 l2 r5_bd8_01_54761.d.xms	0.544385	0.341	0.205	0.271	0	0.098	1.016	3.878	2.823	0.75	0.418	0.723	1.509	1.751	0.218	5.093	0.551	0.868	0	0.226	0	0.29	0.617
EL3	MET5-26 EL3 R5	met5-26 el3 r5_be1_01_54762.d.xms	4.271	4.349	1.607	2.471	0.006	0	5.716	31.826	8.738	5.85	5.229	7.056	12.724	17.981	2.794	53.488	3.736	7.016	0	2.119	0	3.073	6.688
LL3	MET5-26 LL3 R5	met5-26 ll3 r5_be2_01_54763.d.xms	7.82303	6.581	2.287	3.766	0.029	0	10.159	33.553	23.363	10.926	4.416	7.598	10.324	40.82	5.19	139.078	4.283	9.97	0.001	2.969	0	5.1	8.2
PW	MET5-26 PW R5	met5-26 pw r5_be3_01_54764.d.xms	0.158912	0.074	0.081	0.032	0.003	0.209	0.266	0.642	2.861	0.222	0.022	0.049	0.209	0.126	0.022	0.975	0.064	0.417	0	0.146	0	0.393	0.094
PB	MET5-26 PB R5	met5-26 pb r5_be4_01_54765.d.xms	0.0681782	0.055	0	0.032	0	0.262	0.114	0.193	3.084	0.037	0.003	0.006	0.052	0	0.01	0.088	0.072	0.321	0	0.011	0	0.221	0.024
NW	MET5-26 NW R5	met5-26 nw r5_be5_01_54766.d.xms	0.952805	0.855	0.3	0.407	0	0.128	1.612	3.635	4.243	0.443	0.307	0.61	1.251	1.61	0.34	2.722	0.36	0.677	0.001	0.132	0	2.741	0.731
OW	MET5-26 W R5	met5-26 w r5_be6_01_54767.d.xms	0.0697125	0.1	0	0.042	0	0.239	0.149	0.275	3.289	0.057	0.009	0.006	0.079	0.115	0.001	0.341	0.04	0.328	0.002	0.003	0.019	0.01	0.025
L2	MET6-26 L2 R6	met6-26 l2 r6_be7_01_54770.d.xms	1.28535	1.799	0.405	0.545	0	0	2.187	12.539	2.348	2.227	2.311	2.787	5.294	6.641	1.302	12.469	1.307	1.795	0	1.252	0	1.452	2.413
EL3	MET6-26 EL3 R6	met6-26 el3 r6_be8_01_54771.d.xms	3.30726	3.879	1.135	1.73	0.002	0	3.935	19.319	7.44	4.579	3.029	4.966	6.791	12.933	1.62	25.143	2.824	3.893	0	1.256	0	2.438	4.281
LL3	MET6-26 LL3 R6	met6-26 ll3 r6_ga1_01_54772.d.xms	5.26533	7.544	2.71	1.707	0.025	0	9.082	35.903	15.34	5.755	2.435	4.868	10.808	33.378	3.851	112.001	2.248	7.665	0	4.033	0	11.619	6.422
PW	MET6-26 PW R6	met6-26 pw r6_ga2_01_54773.d.xms	3.71067	1.211	2.96	1.052	0.002	0	6.725	16.882	19.112	5.729	0.878	1.411	4.482	4.096	0.704	25.799	1.196	2.337	0	3.008	0	9.208	2.993
PB	MET6-26 PB R6	met6-26 pb r6_ga3_01_54774.d.xms	1.42457	0.625	0.263	0.638	0	0	3.349	4.825	1.369	1.068	0.499	0.79	1.368	0.538	0.472	2.404	0.551	0.519	0	0.999	0	8.865	0.648
NW	MET6-26 NW R6	met6-26 nw r6_ga4_01_54775.d.xms	2.51122	1.669	0.771	1.229	0	0	4.017	8	3.108	1.29	0.663	1.354	2.489	3.466	0.802	7.336	1.035	1.082	0.002	0.757	0	9.123	1.76
OW	MET6-26 W R6	met6-26 w r6_ga5_01_54776.d.xms	0.126463	0.176	0	0.058	0	0.152	0.317	0.586	3.476	0.112	0.024	0.027	0.175	0.247	0.003	0.844	0.097	0.282	0.007	0.007	0.043	0.051	0.071
L2	MET6-26 L2 R7	met6-26 l2 r7_ga6_01_54779.d.xms	3.17887	3.183	1.215	0.565	0.003	0	4.721	14.805	5.882	3.607	2.395	3.917	5.025	8.471	1.252	18.403	1.849	2.661	0	1.354	0	2.207	3.159
EL3	MET6-26 EL3 R7	met6-26 el3 r7_ga7_01_54780.d.xms	4.17608	4.065	1.306	1.718	0.003	0	4.312	25.582	6.838	8.343	4.448	6.285	9.31	20.787	2.15	43.011	3.368	5.51	0.001	2.467	0	2.555	5.443
LL3	MET6-26 LL3 R7	met6-26 ll3 r7_ga8_01_54781.d.xms	17.4304	10.812	6.049	6.06	0.018	0	11.505	94.16	59.666	18.339	11.608	19.309	28.751	87.265	11.317	169.054	17.199	20.227	0	6.251	0	13.374	19.394
PW	MET6-26 PW R7	met6-26 pw r7_gb1_01_54782.d.xms	3.55517	1.105	2.191	0.62	0	0.015	5.714	14.172	20.195	5.18	0.692	1.18	3.859	4.459	0.562	20.977	1.201	2.22	0.001	3.107	0	9.342	2.785
PB	MET6-26 PB R7	met6-26 pb r7_gb2_01_54783.d.xms	1.48595	0.761	0.197	0.62	0	0.018	3.857	5.057	2.819	1.204	0.604	1.28	1.232	1.095	0.717	2.687	0.919	0.801	0	2.121	0	17.667	1.187
NW	MET6-26 NW R7	met6-26 nw r7_gb3_01_54784.d.xms	2.87259	2.19	0.835	1.257	0.005	0	4.805	9.429	2.982	1.499	0.9	1.651	2.857	4.159	1.478	8.144	1.404	1.294	0.003	1.242	0	14.49	2.337
OW	MET6-26 W R7	met6-26 w r7_gb4_01_54785.d.xms	1.50927	1.167	0.133	0.818	0	0.009	2.249	3.277	0	1.034	0.279	0.285	1.003	2.98	0.084	5.43	0.652	0.581	0.049	0.065	0.314	0.347	0.588
L2	MET6-26 L2 R8	met6-26 l2 r8_gb5_01_54788.d.xms	1.52593	1.71	0.618	0.795	0	0.01	2.165	9.951	2.574	2.412	1.284	2.398	3.417	6.16	0.854	12.194	0.931	1.644	0	0.765	0	1.252	1.611
EL3	MET6-26 EL3 R8	met6-26 el3 r8_gb6_01_54789.d.xms	3.39342	3.59	1.195	1.719	0	0.019	4.13	26.748	10.822	5.801	3.9	6.101	9.52	14.611	2.259	33.7	3.182	4.985	0	1.917	0	3.369	5.118
LL3	MET6-26 LL3 R8	met6-26 ll3 r8_gb7_01_54790.d.xms	27.5439	18.284	5.076	7.754	0.079	0	18.805	104.881	46.545	23.734	11.759	21.603	29.989	94.735	14.161	245.066	2.766	24.89	0	11.162	0	13.537	19.153
PW	MET6-26 PW R8	met6-26 pw r8_gb8_01_54791.d.xms	3.16812	0.757	2.17	0.725	0	0.015	5.595	14.416	17.64	3.798	0.763	1.277	3.961	3.391	0.552	22.45	1.151	2.14	0	2.904	0	5.051	2.254
PB	MET6-26 PB R8	met6-26 pb r8_gc1_01_54792.d.xms	1.46046	0.778	0.229	0.719	0	0.017	3.688	4.451	2.236	1.322	0.385	0.911	1.219	0.913	0.558	2.928	0.77	0.825	0	1.828	0	14.934	1.121
NW	MET6-26 NW R8	met6-26 nw r8_gc2_01_54793.d.xms	0.0703141	0.075	0	0.036	0.002	0.193	0.13	0.322	3.112	0.064	0.007	0.028	0.104	0.054	0.017	0.248	0.1	0.29	0	0.028	0	0.483	0.059
OW	MET6-26 W R8	met6-26 w r8_gc3_01_54794.d.xms	1.47056	1.28	0	0.668	0.003	0	2.548	3.428	1.457	0.945	0.227	0.143	1.095	3.027	0.036	6.489	0.633	0.63	0.026	0.044	0.311	0.72	0.521
L2	MET1-26 L2 R9	met1-26 l2 r9_gc4_01_54797.d.xms	0.275166	0.694	0.188	0.169	0	0.184	0.741	3.102	3.239	0.617	0.417	0.664	1.281	1.398	0.168	3.403	0.159	0.773	0	0.159	0	0.368	0.535
EL3	MET1-26 EL3 R9	met1-26 el3 r9_gc5_01_54798.d.xms	3.97699	4.594	1.997	2.778	0.022	0.009	5.266	28.052	7.313	6.719	3.491	5.949	10.067	16.266	1.882	38.061	1.647	5.121	0	1.559	0	1.755	4.164
LL3	MET1-26 LL3 R9	met1-26 ll3 r9_gc6_01_54799.d.xms	0.388746	0.566	0.174	0.115	0.005	0.196	0.407	2.081	3.372	0.547	0.322	0.605	0.754	2.701	0.278	4.472	0.5	0.789	0	0.12	0	0.427	0.542
PW	MET1-26 PW R9	met1-26 pw r9_gc7_01_54800.d.xms	0.446221	0.213	0.368	0.152	0.005	0.217	1.148	2.971	5.713	0.853	0.132	0.213	0.949	0.645	0.088	4.339	0.27	0.647	0	0.227	0	0.858	0.432
PB	MET1-26 PB R9	met1-26 pb r9_gc8_01_54801.d.xms	0.0467441	0.027	0	0.021	0	0.231	0.111	0.155	1.831	0.021	0.003	0.014	0.03	0.016	0.009	0.087	0.022	0.24	0	0.027	0	0.299	0.009
NW	MET1-26 NW R9	met1-26 nw r9_gd1_01_54802.d.xms	0.075531	0.075	0.024	0.037	0	0.227	0.163	0.297	2.388	0.05	0.015	0.041	0.1	0.107	0.026	0.235	0.043	0.279	0	0.022	0	0.294	0.052
OW	MET1-26 W R9	met1-26 w r9_gd2_01_54803.d.xms	0.241004	0.277	0	0.185	0	0.121	0.543	0.982	2.513	0.281	0.04	0.006	0.361	0.751	0.011	1.779	0.154	0.234	0.01	0.006	0.115	0.034	0.068
group		mean	L-Alanine	L-Arginine	L-Asparagine	L-Aspartic Acid	L-Cysteine	L-Cystine	L-Glutamic acid	L-Glutamine	L-Glycine	L-Histidine	L-Isoleucine	L-Leucine	L-Lysine	L-Methionine	L-Phenylalanine	L-Proline	L-Serine	L-Threonine	Tryptamine	L-Tryptophane	Tyramine	L-Tyrosine	L-Valine
L2			0.975142	1.0235	0.344242	0.471357	0.000305863	0.105356	1.54076	6.35507	2.85854	1.42738	0.97626	1.50012	2.40668	3.56531	0.513759	8.35658	0.719319	1.22776	0	0.540347	0	0.701955	1.17463
EL3			3.27101	2.93977	0.986435	1.58285	0.00648428	0.0610431	3.52203	19.4168	7.89075	4.66726	3.1104	4.67921	7.06267	14.7961	1.70874	30.338	2.46149	4.25272	0.000148842	1.38923	0	2.08036	4.02499
LL3			9.24622	6.68312	2.24194	2.98466	0.0224541	0.063017	7.89281	40.537	24.8211	9.59525	4.93176	8.61328	12.1026	43.2573	5.76639	107.736	4.78905	10.2901	6.14093e-05	3.54394	0	6.7967	8.8888
PW			1.66164	0.488661	1.21943	0.466146	0.00182036	0.109375	3.04463	7.68874	11.1088	2.31599	0.401642	0.662001	2.10821	1.81163	0.292018	11.7896	0.774034	1.28341	0.000214285	1.3755	0	3.43307	1.26314
PB			0.567714	0.309732	0.0881304	0.255508	0.000323327	0.150475	1.40284	1.85923	3.33239	0.457528	0.183167	0.368372	0.501191	0.306749	0.214239	1.04212	0.306929	0.447323	1.79706e-05	0.60863	0	5.05878	0.354981
NW			0.774157	0.59356	0.22644	0.353991	0.000727798	0.161047	1.26413	2.5608	3.0512	0.40049	0.222037	0.434843	0.805919	1.09743	0.310554	2.1937	0.385482	0.55561	0.000771638	0.249423	0	3.12791	0.575772
OW			0.68353	0.567047	0.0479787	0.304295	0.000282063	0.13173	1.03782	1.847	2.55003	0.460042	0.124293	0.12005	0.583514	1.09732	0.0442049	2.73265	0.31196	0.426108	0.0145834	0.0367947	0.118588	0.173272	0.256154
		SD
L2			1.05897	1.0571	0.390218	0.541031	0.000917588	0.109456	1.5514	5.79125	1.21834	1.33571	0.969958	1.46679	2.18073	3.45534	0.517068	7.97467	0.669273	0.86762	0	0.542415	0	0.762425	1.14913
EL3			2.53595	1.74211	0.658479	0.849967	0.00754832	0.0860228	2.15955	11.64	4.83804	2.7827	1.89281	2.7159	4.32877	11.4773	1.09353	19.6199	1.53893	2.53937	0.000446527	0.891329	0	1.20843	2.4479
LL3			9.23915	5.69701	2.1412	2.8189	0.0226575	0.0950902	6.18923	38.3562	20.4739	8.27391	4.87514	8.17582	11.3308	36.4037	5.11367	84.572	5.59679	8.75663	0.000184228	3.52184	0	5.48331	7.72628
PW			1.52002	0.434263	1.13997	0.421235	0.00195488	0.0933647	2.63701	6.66962	6.93739	2.19858	0.35006	0.57542	1.74258	1.76343	0.274381	10.39	0.606588	0.831871	0.000455596	1.35298	0	3.80535	1.17303
PB			0.669823	0.317421	0.109675	0.304798	0.00096998	0.106952	1.68534	2.2064	2.9836	0.561334	0.242025	0.487635	0.584979	0.431668	0.283687	1.23832	0.344252	0.221074	5.39119e-05	0.83533	0	6.95752	0.495424
NW			1.12707	0.807654	0.340068	0.518092	0.00159012	0.0999698	1.85729	3.67036	0.75368	0.580591	0.336252	0.637254	1.12617	1.6258	0.510073	3.25273	0.501326	0.384289	0.0011241	0.443964	0	5.16315	0.875779
OW			0.926422	0.674257	0.0962258	0.374508	0.00084619	0.104323	1.24998	2.46494	1.18661	0.57576	0.169679	0.183586	0.780567	1.30714	0.0769134	3.25935	0.392671	0.223027	0.0175038	0.058924	0.133905	0.247548	0.335162
		SE
L2			0.352991	0.352367	0.130073	0.180344	0.000305863	0.0364854	0.517134	1.93042	0.406112	0.445236	0.323319	0.488928	0.726909	1.15178	0.172356	2.65822	0.223091	0.289207	0	0.180805	0	0.254142	0.383043
EL3			0.845318	0.580704	0.219493	0.283322	0.00251611	0.0286743	0.719851	3.87999	1.61268	0.927568	0.630938	0.905301	1.44292	3.82576	0.36451	6.53997	0.512977	0.846456	0.000148842	0.29711	0	0.402809	0.815966
LL3			3.07972	1.899	0.713734	0.939634	0.00755251	0.0316967	2.06308	12.7854	6.82462	2.75797	1.62505	2.72527	3.77694	12.1346	1.70456	28.1907	1.8656	2.91888	6.14093e-05	1.17395	0	1.82777	2.57543
PW			0.506672	0.144754	0.379989	0.140412	0.000651627	0.0311216	0.879003	2.22321	2.31246	0.73286	0.116687	0.191807	0.58086	0.587811	0.0914604	3.46334	0.202196	0.27729	0.000151865	0.450992	0	1.26845	0.391009
PB			0.223274	0.105807	0.0365584	0.101599	0.000323327	0.0356506	0.561781	0.735466	0.994535	0.187111	0.080675	0.162545	0.194993	0.143889	0.0945624	0.412775	0.114751	0.0736913	1.79706e-05	0.278443	0	2.31917	0.165141
NW			0.375691	0.269218	0.113356	0.172697	0.00053004	0.0333233	0.619097	1.22345	0.251227	0.19353	0.112084	0.212418	0.375389	0.541932	0.170024	1.08424	0.167109	0.128096	0.0003747	0.147988	0	1.72105	0.291926
OW			0.308807	0.224752	0.0320753	0.124836	0.000282063	0.0347742	0.41666	0.821647	0.395535	0.19192	0.0565596	0.0611954	0.260189	0.435712	0.0256378	1.08645	0.13089	0.0743424	0.00583461	0.0196413	0.044635	0.0825161	0.111721

## Sheet: tyrosine-means
Day	group	tyr_mean	tyr_ymin	tyr_ymax	log_tyrmean	log_tyrymin	log_tyrymax	se
3	L2	0.701955	0.447813	0.956096	-0.153691	-0.348903	-0.0194984	0.254142
12	EL3	2.08036	1.67755	2.48317	0.318138	0.224675	0.395006	0.402809
18	LL3	6.7967	4.96893	8.62447	0.832298	0.696263	0.935733	1.82777
20	PW	3.43307	2.16462	4.70152	0.535682	0.335381	0.672238	1.26845
23	PB	5.05878	2.73961	7.37796	0.704046	0.437689	0.867936	2.31917
26	NW	3.12791	1.40686	4.84896	0.495254	0.148251	0.685648	1.72105
30	OW	0.173272	0.0907561	0.255788	-0.761271	-1.04212	-0.592119	0.0825161
