# Supplementary material for: Metabolic plasticity supports a flexible nutritional symbiosis in Cardiocondyla ants
Source: Research Square preprint supplement (doi:10.21203/rs.3.rs-7898267/v1), 2025-11-10
Supplement: Supplementary file 10 [file Table-S9-MetabolomicsDietTreatmentsCalc.xlsx]

## Sheet: data entry
Plate_position	sample_ID	number/weight of ants		data_file	L-Alanine	SN	L-Arginine	SN	L-Asparagine	SN	L-Aspartic acid	SN	L-Cysteine	SN	L-Cystine	SN	L-Glutamic acid	SN	L-Glutamine	SN	L-Glycine	SN	L-Histidine	SN	L-Isoleucine	SN	L-Leucine	SN	L-Lysine	SN	L-Methionine	SN	L-Phenylalanine	SN	L-Proline	SN	L-Serine	SN	L-Threonine	SN	Tryptamine	SN	L-Tryptophane	SN	Tyramine	SN	L-Tyrosine	SN	L-Valine
	MET1-26 L2 R1	1	integrated peak area of target analytes	met1-26 l2 r1_ba4_01_54725.d.xms	11397	8	105442	107	0	---	8001.3	9	0	---	106393	45	142772	139	770328	91	6255	24	222893	73	196984	95	0	---	743956	255	0	---	565691	722	1.44032e+06	748	3970	96	442145	210	0	---	126145	92	0	---	68285.5	65	250854
	MET1-26 EL3 R1	1		met1-26 el3 r1_ba5_01_54726.d.xms	249610	173	6.01757e+06	8334	325419	61	867103	402	2922	10	53302	21	3.95571e+06	2769	2.73741e+07	3072	11658	40	8.3843e+06	2912	1.00147e+07	51	34973516	81	3.26843e+07	12970	2044530	1305	1.45472e+07	8371	5.30309e+07	342	567093	1389	2.85521e+06	2653	0	---	3.30625e+06	1142	0	---	3.72482e+06	278	1.02998e+07
	MET1-26 LL3 R1	1		met1-26 ll3 r1_ba6_01_54727.d.xms	140306	112	3.20782e+06	3587	73205	13	128776	117	3313	8	67482	34	1.67729e+06	1317	5.70027e+06	767	8925	26	2.34598e+06	609	1.38814e+06	57	4366872	74	6.34996e+06	3740	783417	585	5.91265e+06	3458	1.7376e+07	1858	157812	409	1.04875e+06	954	0	---	792720	785	0	---	1.06891e+06	737	1.46643e+06
	MET1-26 PW R1	1		met1-26 pw r1_ba7_01_54728.d.xms	570268	353	2.09865e+06	1100	1331702	217	659314	409	1503	5	12785	11	1.1321e+07	9272	2.90292e+07	7037	34144	107	1.02976e+07	3529	3.85358e+06	57	13431266	86	2.75434e+07	21861	597522	784	6.53916e+06	6168	6.84296e+07	1700	1031254	2002	2.14371e+06	2363	0	---	8.43291e+06	2778	0	---	1.20508e+07	330	7.07904e+06
	MET1-26 PB R1	1		met1-26 pb r1_ba8_01_54729.d.xms	45541	59	830367	717	43410	8	51095.3	34	1257	5	82188	52	1.50586e+06	1548	2.24672e+06	733	4959	24	465212	134	387521	58	1404057	83	1.98782e+06	1379	17932	20	687479	661	1.74882e+06	390	47040	132	461714	358	0	---	778556	319	0	---	3.16782e+06	1126	272187
	MET1-26 NW R1	1		met1-26 nw r1_bb1_01_54730.d.xms	26900	39	463115	375	19641	4	32104.3	29	0	---	96228	35	512874	662	1.06709e+06	232	7586	36	134850	55	82933.6	37	461629	78	952832	511	18450	22	297909	387	968803	294	40014	204	417458	184	0	---	63625.9	46	0	---	924106	342	226732
	MET1-26 W R1	1		met1-26 w r1_bb2_01_54731.d.xms	591189	384	5.95867e+06	4521	196111	43	632675	242	0	---	0	---	6.80652e+06	5346	1.58611e+07	3080	7373	31	4.4245e+06	1620	2.47833e+06	46	6148747	55	1.56681e+07	7644	735736	561	2.86638e+06	2290	3.2102e+07	595	582022	967	1.02254e+06	1142	648579	446	669496	328	706462	151	903290	142	4.44608e+06
	MET1-26 L2 R2	1		met1-26 l2 r2_bb3_01_54734.d.xms	27795	23	971931	1119	39728	9	96068.3	93	0	---	88466	38	510737	626	2.39889e+06	375	5700	24	588030	182	494663	53	1163725	67	2.85843e+06	1113	40186	45	799243	843	3.87888e+06	335	120070	509	578890	489	0	---	334093	390	0	---	292778	212	302861
	MET1-26 EL3 R2	1		met1-26 el3 r2_bb4_01_54735.d.xms	56955	53	1.73122e+06	1740	97520	18	293488	185	996	7	91264	73	1.20837e+06	822	6.30021e+06	922	6827	20	2.07329e+06	612	2.31365e+06	83	6105635	73	8.03923e+06	3191	370855	375	3.21164e+06	4019	1.43386e+07	742	39912	186	1.09922e+06	945	0	---	760717	545	0	---	686378	360	2.20321e+06
	MET1-26 LL3 R2	1		met1-26 ll3 r2_bb5_01_54736.d.xms	202370	164	4.76232e+06	3052	71086	16	555453	309	6956	27	99527	33	2.49974e+06	1901	1.00413e+07	3361	9460	33	3.32833e+06	1045	2.0875e+06	43	7669500	69	1.1671e+07	5025	1292384	984	7.61634e+06	5072	3.36608e+07	643	108890	257	1.69542e+06	1340	0	---	1.24895e+06	1036	0	---	1.2024e+06	286	2.3637e+06
	MET1-26 PW R2	1		met1-26 pw r2_bb6_01_54737.d.xms	26315	28	273709	381	87529	13	40898.3	38	0	---	92133	66	832715	986	2.32659e+06	721	10315	24	694132	447	181812	42	636232	71	2.12693e+06	1417	34861	43	251686	278	3.57509e+06	1017	51773	188	616140	518	11796	9	389489	412	0	---	496452	278	338596
	MET1-26 PB R2	1		met1-26 pb r2_bb7_01_54738.d.xms	28346	24	326340	347	0	---	56130.3	42	0	---	112346	54	647016	935	731322	156	9199	39	215274	93	101443	38	550799	69	571448	318	10210	14	309193	303	540368	97	101864	295	561283	337	2944	5	274373	256	0	---	1.7227e+06	1167	180066
	MET1-26 NW R2	1		met1-26 nw r2_bb8_01_54739.d.xms	24252	29	525232	335	20693	7	40471.3	38	0	---	117632	88	377586	425	908896	276	8573	33	150454	47	159048	42	613584	88	873203	439	27421	26	344403	482	811064	169	46172	154	525108	246	0	---	63864.9	61	0	---	442890	236	153706
	MET1-26 W R2	1		met1-26 w r2_bc1_01_54740.d.xms	15505	15	320793	538	0	---	16263.3	20	0	---	119962	43	245510	202	498332	161	7767	18	135498	55	43994.6	33	77580	45	345781	229	21444	43	40270.1	85	804653	239	18810	115	446754	258	25144	25	3739.9	12	31677	17	27494.5	44	67495.6
	MET5-26 L2 R3	1		met5-26 l2 r3_bc2_01_54743.d.xms	26445	25	257553	279	0	---	71871.3	40	0	---	95281	37	375084	321	1.13845e+06	336	6816	18	556139	205	714731	65	2057874	74	1.10723e+06	653	114652	138	893267	1019	3.38611e+06	343	114714	416	602612	296	0	---	181067	124	0	---	166536	103	595325
	MET5-26 EL3 R3	1		met5-26 el3 r3_bc3_01_54744.d.xms	1630432	861	1.25968e+07	14216	617095	145	1.21072e+06	625	8259	42	0	---	1.08938e+07	7028	5.16648e+07	1272	35100	144	1.67414e+07	4132	3.02614e+07	39	100322832	63	6.34371e+07	32341	10049198	2397	4.56693e+07	38200	1.39606e+08	444	2405723	4038	7.3989e+06	9520	0	---	9.17618e+06	3140	0	---	9.43996e+06	131	2.64141e+07
	MET5-26 LL3 R3	1		met5-26 ll3 r3_bc4_01_54745.d.xms	1402981	1625	2.28064e+07	23426	865971	173	736396	653	4079	16	0	---	1.786e+07	15840	5.18302e+07	9225	48313	176	2.53936e+07	9379	1.91902e+07	---	104684856	71	5.17658e+07	52759	11972556	1879	8.01749e+07	55895	3.11215e+08	965	2328778	5627	9.27622e+06	12573	0	---	1.29704e+07	3979	0	---	2.11549e+07	218	4.158e+07
	MET5-26 PW R3	1		met5-26 pw r3_bc5_01_54746.d.xms	218573	193	1.43695e+06	1009	454904	79	269889	169	1576	4	68460	51	4.00194e+06	2482	9.42858e+06	1924	21554	63	2.47979e+06	568	1.14835e+06	54	3729687	96	9.18914e+06	7842	189067	200	1.61143e+06	1848	1.92982e+07	508	497734	1705	1.09646e+06	1269	0	---	2.37123e+06	1668	0	---	2.24973e+06	354	2.32754e+06
	MET5-26 PB R3	1		met5-26 pb r3_bc6_01_54747.d.xms	79107	91	1.13356e+06	1244	54142	6	104245	88	0	---	97812	3	1.86306e+06	1928	2.35989e+06	537	33393	129	548297	181	345335	50	1301236	96	2.16732e+06	2092	26335	24	778870	937	1.71048e+06	526	99039	415	569506	279	0	---	594742	632	0	---	3.35588e+06	622	379932
	MET5-26 NW R3	1		met5-26 nw r3_bc7_01_54748.d.xms	59964	78	801481	616	41224	8	105338	136	0	---	82795	32	577226	930	1.03081e+06	331	10619	26	366208	137	300804	45	1270176	89	1.03658e+06	673	45499	62	851933	900	1.11622e+06	138	248088	600	593910	405	11427	8	87309.9	87	0	---	835948	396	395828
	MET5-26 W R3	1		met5-26 w r3_bc8_01_54749.d.xms	15173	14	313642	210	0	---	18627.3	21	0	---	113050	2	329966	446	584617	171	11877	24	84927.7	40	64410.6	32	184240	39	424505	356	26846	29	78810.1	129	1.04493e+06	361	40460	203	469289	372	0	---	17284.9	24	0	---	48782.5	64	135093
	MET5-26 L2 R4	1		met5-26 l2 r4_bd1_01_54752.d.xms	432603	220	4.06016e+06	4561	254368	80	1.02568e+06	905	0	---	0	---	5.93479e+06	4007	2.52384e+07	3530	6671	34	7.99723e+06	2687	1.03908e+07	44	34962092	68	3.32183e+07	16008	2310237	1136	8.47284e+06	13120	7.41145e+07	1288	730835	1666	2.62115e+06	2242	0	---	3.7049e+06	1281	0	---	1.61738e+06	231	9.57955e+06
	MET5-26 EL3 R4	1		met5-26 el3 r4_bd2_01_54753.d.xms	136123	141	1.01792e+06	744	57282	15	258371	265	0	---	87328	43	686950	1029	1.30561e+06	395	11853	28	1.3187e+06	483	766319	57	2213025	85	1.48482e+06	453	248370	291	1.535e+06	1973	5.67674e+06	225	920021	1681	840377	796	0	---	202281	267	0	---	388918	311	881799
	MET5-26 LL3 R4	1		met5-26 ll3 r4_bd3_01_54754.d.xms	2283623	1913	1.8076e+07	18101	679120	139	1.87253e+06	1077	7731	35	0	---	1.20819e+07	5635	7.93078e+07	12760	40543	222	2.15927e+07	7179	4.86908e+07	40	188454400	64	8.51567e+07	44448	19255564	2966	1.2793e+08	123603	3.43337e+08	944	3091157	7603	1.15462e+07	11028	0	---	1.41243e+07	1840	0	---	2.34702e+07	141	6.43864e+07
	MET5-26 PW R4	1		met5-26 pw r4_bd4_01_54755.d.xms	169552	138	1.11732e+06	830	380459	101	171227	126	0	---	83872	2	3.25572e+06	3530	8.21721e+06	2592	15999	45	2.13744e+06	570	1.20777e+06	49	3812488	68	7.98992e+06	4420	170977	173	1.19284e+06	1238	1.47777e+07	864	295232	650	930140	1032	0	---	1.21379e+06	775	0	---	731730	300	2.22288e+06
	MET5-26 PB R4	1		met5-26 pb r4_bd5_01_54756.d.xms	30940	33	403668	476	0	---	45864.3	39	0	---	105981	53	514116	882	801887	226	7556	31	199712	109	108508	35	386550	62	672331	475	0	---	271367	403	461717	87	70968	271	414951	213	0	---	218995	226	0	---	1.03944e+06	496	93556.6
	MET5-26 NW R4	1		met5-26 nw r4_bd6_01_54757.d.xms	19283	17	374208	374	21437	7	31743.3	34	0	---	121760	65	369606	364	886365	264	5611	25	74314.7	40	92256.6	44	405812	63	855771	432	25539	36	196624	375	809316	203	11258	118	429554	304	0	---	28011.9	34	0	---	385048	352	154576
	MET5-26 W R4	1		met5-26 w r4_bd7_01_54758.d.xms	24061	29	704393	636	20786	7	38282.3	41	0	---	91894	65	533740	440	985391	333	8078	30	195798	72	234188	52	595836	73	888594	500	55852	87	230303	366	1.99591e+06	493	29828	215	522612	522	43681	39	74176.9	73	34501	25	74918.5	89	268706
	MET5-26 L2 R5	1		met5-26 l2 r5_bd8_01_54761.d.xms	142619	98	1.31661e+06	1576	168732	38	223148	177	0	---	49227	0	2.58974e+06	1671	9.88251e+06	1447	6697	15	1.89407e+06	859	2.52739e+06	44	9003079	83	1.21151e+07	5340	525016	654	2.6947e+06	3387	1.80422e+07	285	350200	837	1.20007e+06	1507	0	---	844225	462	0	---	803486	303	2.82738e+06
	MET5-26 EL3 R5	1		met5-26 el3 r5_be1_01_54762.d.xms	733126	615	1.25336e+07	9646	980302	269	1.50708e+06	872	3272	11	0	---	1.02898e+07	7006	5.72942e+07	9849	15103	70	1.61702e+07	4251	2.98292e+07	36	94584384	56	7.45776e+07	42959	4961755	1608	3.79174e+07	38895	1.23719e+08	507	1561769	3626	6.24533e+06	10968	0	---	8.71315e+06	1781	0	---	8.61147e+06	177	2.29997e+07
	MET5-26 LL3 R5	1		met5-26 ll3 r5_be2_01_54763.d.xms	1160160	1204	1.65046e+07	14349	850995	256	1.40146e+06	982	14561	70	0	---	1.50586e+07	11310	4.97369e+07	6952	30949	128	1.97517e+07	7320	2.39161e+07	38	96240880	65	5.39784e+07	23853	12277949	2842	6.89067e+07	87486	3.13399e+08	1163	1430740	3414	7.36475e+06	11390	10838	9	1.19451e+07	1914	0	---	1.4002e+07	340	3.45068e+07
	MET5-26 PW R5	1		met5-26 pw r5_be3_01_54764.d.xms	41369	27	346254	273	78258	21	31258.3	33	1475	9	101801	60	770752	956	1.8607e+06	715	7681	17	555189	175	142062	48	582303	75	1.73079e+06	1233	42270	67	289543	405	3.36594e+06	680	44068	126	582942	317	0	---	588828	697	0	---	1.05284e+06	578	399128
	MET5-26 PB R5	1		met5-26 pb r5_be4_01_54765.d.xms	21015	25	280294	311	0	---	32795.3	31	0	---	121247	7	366878	430	622860	191	8644	25	107286	47	17116.6	20	65044	43	473927	310	0	---	117769	191	353769	121	55373	186	525838	457	0	---	39436.9	64	0	---	562790	321	109435
	MET5-26 NW R5	1		met5-26 nw r5_be5_01_54766.d.xms	221836	239	3.46868e+06	3364	247022	75	334859	195	0	---	61147	37	3.88405e+06	3989	8.75728e+06	3691	7997	13	1.39493e+06	562	1.84002e+06	45	7252715	78	9.67375e+06	5181	503588	375	4.30966e+06	5629	8.59466e+06	366	211492	306	834757	842	22213	24	507827	231	0	---	7.21131e+06	1396	3.00428e+06
	MET5-26 W R5	1		met5-26 w r5_be6_01_54767.d.xms	22379	28	525929	387	0	---	38715.3	32	0	---	119796	87	499979	568	923617	349	10528	25	170951	69	63704.6	25	76875	38	754255	511	38880	51	17536.1	90	1.36157e+06	285	32136	158	545357	564	32044	36	14600.9	23	58045	46	27655.5	39	126075
	MET6-26 L2 R6	1		met6-26 l2 r6_be7_01_54770.d.xms	202662	91	4.07263e+06	3168	219189	86	294899	170	0	---	0	---	3.54519e+06	1673	2.03276e+07	3796	3343	17	3.95955e+06	1581	1.19762e+07	47	35956640	58	2.43283e+07	10917	2055770	1500	1.42146e+07	13646	4.20067e+07	758	444965	705	1.51404e+06	1105	0	---	4.14282e+06	665	0	---	4.25456e+06	200	1.12437e+07
	MET6-26 EL3 R6	1		met6-26 el3 r6_be8_01_54771.d.xms	898196	642	1.76834e+07	10396	990298	191	1.50961e+06	909	1065	6	0	---	9.85184e+06	10041	4.83666e+07	5925	21288	174	1.57622e+07	3752	2.03733e+07	50	72468168	75	5.97583e+07	22679	4226245	1761	2.56773e+07	38374	9.72853e+07	318	1735587	5215	5.1888e+06	6236	0	---	6.03161e+06	1547	0	---	7.67538e+06	350	2.21444e+07
	MET6-26 LL3 R6	1		met6-26 ll3 r6_ga1_01_54772.d.xms	893500	626	2.22898e+07	16635	1270279	242	800217	445	13025	67	0	---	1.55194e+07	16155	6.13494e+07	13138	22528	110	1.3328e+07	4812	1.63843e+07	---	69849144	60	6.95893e+07	43912	9022082	1886	6.00765e+07	105183	2.58557e+08	4148	864440	2227	6.44353e+06	13239	0	---	1.90623e+07	2845	0	---	3.34189e+07	415	2.55456e+07
	MET6-26 PW R6	1		met6-26 pw r6_ga2_01_54773.d.xms	987073	740	5.49055e+06	10390	1853760	480	659126	833	869	5	0	---	1.52672e+07	12508	3.83261e+07	7214	43562	171	1.28194e+07	2845	5.46866e+06	49	18678514	63	3.54578e+07	20205	1411432	783	9.58969e+06	9357	1.01915e+08	4943	689934	2409	2.9662e+06	2882	0	---	1.24176e+07	5513	0	---	2.69705e+07	234	1.64321e+07
	MET6-26 PB R6	1		met6-26 pb r6_ga3_01_54774.d.xms	250224	162	1.78157e+06	1317	148021	40	359269	308	0	---	0	---	5.61764e+06	3941	8.09363e+06	3492	2975	14	2.11898e+06	794	2.87622e+06	48	10585266	74	7.7518e+06	5505	140909	177	6.43158e+06	7693	7.95204e+06	1045	217708	318	465726	470	0	---	4.12781e+06	750	0	---	2.55539e+07	198	2.74402e+06
	MET6-26 NW R6	1		met6-26 nw r6_ga4_01_54775.d.xms	417967	143	4.37103e+06	1863	358487	47	571008	270	0	---	0	---	6.59438e+06	2002	1.31315e+07	1294	4677	20	2.40744e+06	343	4.24874e+06	48	17703164	77	1.31055e+07	7606	1134640	827	1.03496e+07	7884	2.6377e+07	1028	362865	427	921958	1180	45765	29	2.961e+06	686	0	---	2.72384e+07	185	9.22886e+06
	MET6-26 W R6	1		met6-26 w r6_ga5_01_54776.d.xms	34577	42	686584	796	0	---	60835.3	71	0	---	76489	2	966388	924	1.78745e+06	780	7610	21	370058	161	165724	49	339594	53	1.59079e+06	1032	80636	77	45410.1	207	3.21293e+06	861	67274	372	431088	330	138772	156	27806.9	29	129565	86	141802	99	321145
	MET6-26 L2 R7	1		met6-26 l2 r7_ga6_01_54779.d.xms	604036	416	9.38125e+06	7758	765811	242	356030	257	1442	9	0	---	9.66018e+06	9858	3.02922e+07	6528	9701	58	8.8228e+06	2571	1.52475e+07	39	52394948	67	3.91903e+07	29619	2705002	1334	1.71596e+07	17242	6.05762e+07	404	868441	1636	2.81483e+06	3011	0	---	5.62503e+06	2340	0	---	6.35976e+06	137	1.5996e+07
	MET6-26 EL3 R7	1		met6-26 el3 r7_ga7_01_54780.d.xms	556610	323	7.41684e+06	6843	543640	108	714846	460	1469	5	0	---	5.79324e+06	3793	3.43684e+07	6079	8072	34	1.24609e+07	2098	2.56094e+07	50	82345128	63	4.12052e+07	19687	6395536	2291	2.63319e+07	25682	1.16199e+08	717	994289	2150	3.80324e+06	6771	28983	17	9.15846e+06	1462	0	---	7.73988e+06	307	2.46324e+07
	MET6-26 LL3 R7	1		met6-26 ll3 r7_ga8_01_54781.d.xms	2078885	1191	2.04417e+07	13444	1842764	345	1.84614e+06	1672	8481	41	0	---	1.34641e+07	12435	1.10194e+08	22255	56137	301	2.54916e+07	7905	6.58099e+07	33	241362448	52	1.22133e+08	59142	27423018	3410	1.55904e+08	164953	3.4928e+08	1044	4561061	9379	1.21555e+07	12320	0	---	2.60943e+07	2125	0	---	3.46679e+07	346	7.90196e+07
	MET6-26 PW R7	1		met6-26 pw r7_gb1_01_54782.d.xms	554865	327	2.4299e+06	2636	1126229	242	318547	150	0	---	7454	11	9.58784e+06	8614	2.37786e+07	7194	25398	81	8.52852e+06	2478	4.1622e+06	47	15310981	76	2.14256e+07	12811	1341471	842	7.49322e+06	7604	6.34989e+07	3947	427426	987	1.84965e+06	2740	25899	18	1.25567e+07	1770	0	---	2.62278e+07	288	1.25271e+07
	MET6-26 PB R7	1		met6-26 pb r7_gb2_01_54783.d.xms	241863	131	1.73821e+06	1300	119371	55	374544	241	0	---	8928	11	6.31042e+06	7476	8.27266e+06	4163	4711	27	2.41541e+06	772	3.62576e+06	49	17177230	68	7.53507e+06	4757	306084	295	1.04222e+07	17316	7.2467e+06	596	382673	865	719376	756	0	---	9.33861e+06	2957	0	---	4.82284e+07	314	4.5124e+06
	MET6-26 NW R7	1		met6-26 nw r7_gb3_01_54784.d.xms	516578	486	5.53549e+06	6237	547050	118	823257	530	2327	5	0	---	9.07957e+06	8539	1.78196e+07	6046	5569	26	3.11246e+06	789	5.41051e+06	---	21457578	102	1.84957e+07	10595	1588324	975	1.66728e+07	27155	2.69097e+07	381	641614	1813	1.24531e+06	1222	59893	51	4.24759e+06	1265	0	---	4.02619e+07	186	1.19945e+07
	MET6-26 W R7	1		met6-26 w r7_gb4_01_54785.d.xms	244804	162	2.39447e+06	2263	60925	16	375479	399	0	---	4934	7	3.78604e+06	2162	5.51675e+06	857	0	---	1.75234e+06	660	1.50338e+06	72	3553206	60	5.39102e+06	2150	903445	555	1.00795e+06	1253	1.7739e+07	1567	249651	443	494383	661	1012201	685	236640	110	1005505	275	1.01114e+06	229	2.71906e+06
	MET6-26 L2 R8	1		met6-26 l2 r8_gb5_01_54788.d.xms	275996	194	4.44752e+06	5481	345871	98	444707	419	0	---	5284	12	4.23476e+06	4868	1.94683e+07	6253	3875	17	5.12595e+06	3191	7.86908e+06	48	30476130	69	2.48146e+07	12103	1814022	1461	1.20662e+07	16724	3.80884e+07	573	398968	1878	1.55482e+06	1906	0	---	3.2738e+06	2243	0	---	3.52284e+06	277	7.31274e+06
	MET6-26 EL3 R8	1		met6-26 el3 r8_gb6_01_54789.d.xms	510585	269	8.08884e+06	9916	598837	179	861227	637	0	---	9525	11	6.57665e+06	6491	4.25953e+07	7368	15477	81	9.79722e+06	3845	2.22697e+07	40	77999648	65	5.42829e+07	30259	4801707	2404	2.94308e+07	40786	1.02918e+08	469	1112999	3591	3.96126e+06	4583	0	---	7.56811e+06	1501	0	---	9.44398e+06	192	2.4191e+07
	MET6-26 LL3 R8	1		met6-26 ll3 r8_gb7_01_54790.d.xms	3147201	1684	3.72929e+07	28305	1551786	598	2.37056e+06	1426	36838	141	0	---	2.23468e+07	22721	1.24636e+08	21949	42345	173	3.90748e+07	8608	6.95061e+07	33	264838032	49	1.47388e+08	73666	30576672	4072	1.83213e+08	179671	4.49786e+08	1150	729309	1550	1.46811e+07	16824	0	---	4.37622e+07	11890	0	---	3.47401e+07	230	7.48743e+07
	MET6-26 PW R8	1		met6-26 pw r8_gb8_01_54791.d.xms	539614	489	1.72942e+06	1265	1226960	327	409868	251	0	---	7404	12	9.78755e+06	8946	2.52214e+07	6217	29391	245	6.70405e+06	3563	4.63793e+06	41	15989728	72	2.28713e+07	14908	1153000	746	6.97201e+06	8117	6.67577e+07	3522	439268	773	1.84092e+06	2245	0	---	1.11044e+07	4292	0	---	1.41034e+07	223	1.03963e+07
	MET6-26 PB R8	1		met6-26 pb r8_gc1_01_54792.d.xms	251287	141	1.84977e+06	1408	116168	53	364482	299	0	---	7987	12	6.56412e+06	4687	7.92166e+06	1374	3975	16	2.36452e+06	926	2.33741e+06	---	11141219	75	7.48341e+06	3099	273426	242	6.92295e+06	9391	9.14764e+06	1090	306053	648	691533	801	0	---	6.86714e+06	2092	0	---	3.92014e+07	857	4.76288e+06
	MET6-26 NW R8	1		met6-26 nw r8_gc2_01_54793.d.xms	19018	29	281892	346	0	---	33453.3	35	926	8	92127	57	381587	351	942242	363	8181	29	166570	60	42989.6	28	326145	50	838819	502	16854	26	276039	248	894419	124	69225	299	413066	429	0	---	133406	82	0	---	1.26546e+06	660	270366
	MET6-26 W R8	1		met6-26 w r8_gc3_01_54794.d.xms	189958	97	2.2082e+06	3480	0	---	329260	220	1285	8	0	---	3.59072e+06	2358	4.83087e+06	1371	1517	10	1.2163e+06	327	1.33067e+06	61	1630269	52	4.73462e+06	4035	792288	668	507712	570	1.71856e+07	713	210089	791	420519	839	512091	561	188837	56	952787	175	2.00574e+06	213	2.03421e+06
	MET1-26 L2 R9	1		met1-26 l2 r9_gc4_01_54797.d.xms	76321	82	2.90847e+06	2214	158233	76	142654	138	0	---	82231	56	2.04321e+06	1288	8.55358e+06	1717	9221	37	1.65117e+06	475	2.52574e+06	58	7507219	65	1.01761e+07	3658	423634	372	2.26734e+06	3625	1.17576e+07	650	106463	269	1.05024e+06	1477	0	---	651478	525	0	---	903396	565	2.36968e+06
	MET1-26 EL3 R9	1		met1-26 el3 r9_gc5_01_54798.d.xms	954797	717	1.7112e+07	10680	1121751	592	1.56088e+06	1733	10663	32	4405	8	1.09424e+07	6197	5.82913e+07	6138	16944	75	1.92809e+07	4488	2.05702e+07	37	71770536	57	7.37977e+07	27944	4589652	1986	2.57177e+07	42635	1.25667e+08	312	861921	2665	5.97241e+06	7674	0	---	6.45669e+06	2723	0	---	4.77817e+06	192	2.0704e+07
	MET1-26 LL3 R9	1		met1-26 ll3 r9_gc6_01_54799.d.xms	111946	97	2.51695e+06	1375	160339	57	106031	99	2230	12	93401	87	1.21607e+06	1972	6.21405e+06	1963	8795	27	1.55563e+06	478	1.97707e+06	60	7069403	90	6.53515e+06	2494	779483	941	4.73286e+06	5099	1.52342e+07	1325	348503	997	1.1791e+06	1494	0	---	620394	409	0	---	1.11596e+06	487	2.46562e+06
	MET1-26 PW R9	1		met1-26 pw r9_gc7_01_54800.d.xms	130384	90	1.0513e+06	1524	357731	103	147899	156	1934	11	79818	70	3.36021e+06	3254	8.69593e+06	2672	15987	69	2.58313e+06	825	607930	57	2004728	80	7.99591e+06	3980	145891	196	1.46215e+06	1231	1.57727e+07	3266	191537	645	924403	943	0	---	1.14157e+06	1299	0	---	1.73388e+06	319	1.82036e+06
	MET1-26 PB R9	1		met1-26 pb r9_gc8_01_54801.d.xms	13856	14	123864	139	0	---	16245.3	25	0	---	110081	65	325895	524	455488	220	5664	23	61439.7	31	16779.6	20	163419	53	239246	87	4662	8	125055	235	345849	116	16369	142	359177	287	0	---	114451	179	0	---	783526	489	39343.6
	MET1-26 NW R9	1		met1-26 nw r9_gd1_01_54802.d.xms	23529	34	362760	380	27560	17	41947.3	52	0	---	111371	63	525695	703	955997	312	7178	30	148591	40	98999.6	33	481600	65	876582	294	30307	38	315541	932	942264	289	32616	128	460185	441	0	---	82225.9	78	0	---	792416	660	249632
	MET1-26 W R9	1		met1-26 w r9_gd2_01_54803.d.xms	67008	89	1.15114e+06	1290	0	---	139200	149	0	---	56897	49	1.57034e+06	1091	2.83794e+06	558	6328	29	969509	255	237234	90	71086	45	2.62035e+06	1447	216390	258	157170	327	6.9963e+06	1631	98338	450	348925	256	191710	124	26892.9	29	327329	146	86489.5	106	312104
[truncated: 34 more columns]

## Sheet: result_calculation_nmol mL-1
	IS batch	MBBD1153			L-Alanine		L-Arginine		L-Asparagine		L-Aspartic Acid		L-Cysteine		L-Cystine		L-Glutamic acid		L-Glutamine		L-Glycine		L-Histidine		L-Isoleucine		L-Leucine		L-Lysine		L-Methionine		L-Phenylalanine		L-Proline		L-Serine		L-Threonine		Tryptamine		L-Tryptophane		Tyramine		L-Tyrosine		L-Valine
	Extraction volume [µl]		Std	fmol/ng labAA	3547	lab-Ala (BA)	579	lab-Arg (BC)	1825	lab-Asx (BE)	1825	lab-Asx (BE)	328	lab-Tyr (CC)	328	lab-Tyr (CC)	1597	lab-Glx (BG)	1597	lab-Glx (BG)	8200	lab-Gly (BI)	124	lab-His (BK)	663	lab-Ile (BM)	1324	lab-Leu (BO)	223	lab-Lys (BQ)	1398	lab-Met (BS)	454	lab-Phe (BU)	1016	lab-Pro (BW)	1222	lab-Ser (BY)	1145	lab-Thr (CA)	328	lab-Tyr (CC)	454	lab-Phe (BU)	328	lab-Tyr (CC)	328	lab-Tyr (CC)	1299
	Dilution factor	2		nmol/mL	1.7735		0.2895		0.9125		0.9125		0.164		0.164		0.7985		0.7985		4.1		0.062		0.3315		0.662		0.1115		0.699		0.227		0.508		0.611		0.5725		0.164		0.227		0.164		0.164		0.6495
	final ng labAA/mL	500	Capsule	RF	1		1		1		1		5.5		5.5		1		1		1		1		1		1		1		1		1		1		1		1		0.14		3.3		0.91		1		1
				Leaf	1		1		1		1		5.5		5.5		1		1		1		1		1		1		1		1		1		1		1		1		0.13		3.3		0.93		1		1
				Capsule	1		1		1		1		5.5		5.5		1		1		1		1		1		1		1		1		1		1		1		1		0.14		3.3		0.91		1		1
sample_ID	Plate_position	data_file	number/weight of ants	Seed	1		1		1		1		5.5		5.5		1		1		1		1		1		1		1		1		1		1		1		1		0.19		4.2		0.87		1		1
MET1-26 L2 R1		met1-26 l2 r1_ba4_01_54725.d.xms	1	sample concentration nmol/mL	0.11998		0.0717932		0		0.0259216		0		0.73679		0.157196		0.848153		5.81135		0.229739		0.104234		0		0.280591		0		0.129322		1.27449		0.0165379		0.959885		0		0.0951647		0		0.0859798		0.191267
MET1-26 EL3 R1		met1-26 el3 r1_ba5_01_54726.d.xms	1		2.86344		3.83149		1.17841		3.13997		0.0195859		0.357278		4.78127		33.0871		11.783		6.93125		5.39728		8.69448		11.5479		23.7072		2.4495		47.5367		2.61157		6.67725		0		1.83716		0		4.53947		7.13197
MET1-26 LL3 R1		met1-26 ll3 r1_ba6_01_54727.d.xms	1		1.40343		1.84616		0.215141		0.378458		0.0203361		0.414224		1.73235		5.88738		8.75733		1.90271		0.659992		1.04494		1.99962		7.87784		1.24783		13.9052		0.620216		2.13477		0		0.552086		0		1.19295		1.04138
MET1-26 PW R1		met1-26 pw r1_ba7_01_54728.d.xms	1		5.91013		1.12034		5.57137		2.75834		0.0081626		0.0694337		12.4542		31.9349		38.48		8.23946		1.77797		2.89241		8.15717		5.65031		1.17876		52.2968		4.54882		4.68977		0		5.01642		0		11.8993		4.20726
MET1-26 PB R1		met1-26 pb r1_ba8_01_54729.d.xms	1		0.416147		0.437327		0.111512		0.131254		0.00727485		0.47566		1.33986		1.99905		4.76659		0.380699		0.172461		0.327004		0.599784		0.166714		0.146334		1.20295		0.168958		0.822038		0		0.546877		0		3.3334		0.160134
MET1-26 NW R1		met1-26 nw r1_bb1_01_54730.d.xms	1		0.224759		0.234885		0.0504387		0.0824449		0		0.557154		0.436354		0.907879		6.74311		0.103417		0.0374167		0.10653		0.278472		0.172155		0.0624931		0.631355		0.132883		0.715569		0		0.0440449		0		0.972821		0.12866
MET1-26 W R1		met1-26 w r1_bb2_01_54731.d.xms	1		6.39364		4.6011		0.692306		2.23345		0		0		7.97707		18.5888		8.50332		3.94803		1.21537		1.35642		5.89243		6.00783		0.592389		21.8285		2.78832		2.21998		0.0856104		0.456599		0.60613		0.851653		2.3141
MET1-26 L2 R2		met1-26 l2 r2_bb3_01_54734.d.xms	1		0.226663		0.513965		0.0972418		0.235145		0		0.438106		0.421518		1.97984		4.4186		0.445523		0.1794		0.223386		0.743569		0.34767		0.129911		2.4523		0.392317		0.931574		0		0.179204		0		0.26362		0.16704
MET1-26 EL3 R2		met1-26 el3 r2_bb4_01_54735.d.xms	1		0.472243		0.869723		0.235819		0.709703		0.00536542		0.491637		0.992197		5.17314		5.30831		1.79265		0.970741		1.3254		2.15155		2.96391		0.596142		9.4972		0.137148		1.78185		0		0.465972		0		0.672273		1.15635
MET1-26 LL3 R2		met1-26 ll3 r2_bb5_01_54736.d.xms	1		1.64579		2.22037		0.174565		1.36402		0.0358339		0.512714		2.00092		8.03756		8.12613		2.40037		0.807741		1.61382		2.81219		10.3109		1.55137		20.4829		0.360765		2.59417		0		0.839514		0		1.12621		1.12634
MET1-26 PW R2		met1-26 pw r2_bb6_01_54737.d.xms	1		0.251347		0.15404		0.233045		0.108891		0		0.48871		0.76797		2.14569		10.6649		0.611131		0.0739281		0.138668		0.67298		0.368367		0.0481513		2.70491		0.190521		1.13895		0.00159271		0.2459		0		0.478797		0.234354
MET1-26 PB R2		met1-26 pb r2_bb7_01_54738.d.xms	1		0.230716		0.155728		0		0.13844		0		0.606179		0.505433		0.571291		6.87243		0.182122		0.0423511		0.120384		0.156876		0.0894396		0.0608268		0.352221		0.325068		0.871421		0.000404339		0.178123		0		1.69001		0.105245
MET1-26 NW R2		met1-26 nw r2_bb8_01_54739.d.xms	1		0.21883		0.270236		0.0519004		0.101507		0		0.597631		0.323956		0.779802		7.45399		0.130576		0.0647278		0.124035		0.258755		0.273773		0.0654687		0.579285		0.157794		0.929396		0		0.040063		0		0.40911		0.103498
MET1-26 W R2		met1-26 w r2_bc1_01_54740.d.xms	1		0.117632		0.153374		0		0.0374537		0		0.596009		0.180112		0.365588		5.73468		0.0980172		0.0169728		0.0161029		0.0895042		0.168412		0.0073198		0.483084		0.057802		0.656676		0.00317987		0.00224332		0.0260395		0.0248366		0.0336235
MET5-26 L2 R3		met5-26 l2 r3_bc2_01_54743.d.xms	1		0.200362		0.134501		0		0.166929		0		0.465053		0.289751		0.879445		4.95533		0.420862		0.280631		0.411553		0.305312		0.979836		0.162417		2.06592		0.364699		0.891518		0		0.108643		0		0.147788		0.300892
MET5-26 EL3 R3		met5-26 el3 r3_bc3_01_54744.d.xms	1		21.2445		9.70069		2.49703		4.89909		0.0397217		0		14.4796		68.671		47.0448		16.9562		13.0391		18.888		23.7264		97.8354		8.33379		138.232		12.36		19.4534		0		5.52579		0		8.25482		17.524
MET5-26 LL3 R3		met5-26 ll3 r3_bc4_01_54745.d.xms	1		20.9827		18.4635		4.60036		3.91201		0.0191112		0		27.2167		78.9835		77.4368		33.7789		8.20568		18.7321		21.0034		116.167		14.4741		341.266		15.1836		29.0163		0		7.72716		0		18.0211		25.3044
MET5-26 PW R3		met5-26 pw r3_bc5_01_54746.d.xms	1		2.00579		0.718414		1.21091		0.718417		0.0079884		0.347009		3.62172		8.53277		22.7996		2.09892		0.457277		0.773774		2.55082		1.52122		0.300611		13.3903		1.82912		1.97936		0		1.45976		0		2.07334		1.25368
MET5-26 PB R3		met5-26 pb r3_bc6_01_54747.d.xms	1		0.633009		0.554743		0.147415		0.283834		0		0.466764		1.48597		1.88224		27.853		0.448795		0.129302		0.260251		0.570459		0.23966		0.147092		1.09153		0.330763		0.905748		0		0.370651		0		2.91171		0.199559
MET5-26 NW R3		met5-26 nw r3_bc7_01_54748.d.xms	1		0.613003		0.508817		0.114649		0.29296		0		0.426291		0.568151		1.01461		10.249		0.353092		0.122918		0.249525		0.357908		0.528698		0.160984		0.913359		0.989883		1.12115		0.00149761		0.0544447		0		0.782562		0.284666
MET5-26 W R3		met5-26 w r3_bc8_01_54749.d.xms	1		0.130955		0.163972		0		0.0441679		0		0.582354		0.267497		0.473938		9.21482		0.0727065		0.0255253		0.0375063		0.128562		0.22012		0.0146643		0.679368		0.135659		0.762949		0		0.0106135		0		0.0456897		0.0774368
MET5-26 L2 R4		met5-26 l2 r4_bd1_01_54752.d.xms	1		4.36944		2.98979		1.06983		4.31388		0		0		6.72336		28.5919		6.96577		6.98586		4.33978		6.89613		11.5061		17.8387		1.65291		53.3278		3.41896		5.48626		0		2.38512		0		1.37391		4.93219
MET5-26 EL3 R4		met5-26 el3 r4_bd2_01_54753.d.xms	1		1.20551		0.548028		0.183286		0.826714		0		0.455595		0.595965		1.13268		10.5292		1.10136		0.333744		0.480374		0.455519		1.9633		0.303594		3.83016		3.38616		1.45856		0		0.132024		0		0.36891		0.515327
MET5-26 LL3 R4		met5-26 ll3 r4_bd3_01_54754.d.xms	1		37.8795		18.3722		4.71252		12.9938		0.0406635		0		21.7438		142.731		93.4381		29.5578		24.9417		37.4503		44.9294		191.684		25.4767		374.224		24.0985		38.9289		0		9.28225		0		22.4451		38.2516
MET5-26 PW R4		met5-26 pw r4_bd4_01_54755.d.xms	1		1.62199		0.600753		0.99683		0.448628		0		0.417239		3.04072		7.67457		14.1982		1.70669		0.51102		0.766859		2.40518		1.42869		0.22241		10.5239		1.14073		1.66533		0		0.746845		0		0.661845		1.32912
MET5-26 PB R4		met5-26 pb r4_bd5_01_54756.d.xms	1		0.278953		0.205907		0		0.121348		0		0.519523		0.434815		0.678198		7.13898		0.153212		0.0422873		0.0796183		0.197272		0		0.0499427		0.317976		0.244166		0.698856		0		0.133003		0		0.926435		0.0509877
MET5-26 NW R4		met5-26 nw r4_bd6_01_54757.d.xms	1		0.155803		0.182174		0.051101		0.0756689		0		0.671385		0.295453		0.708536		4.62507		0.0586952		0.0396311		0.0919147		0.236283		0.227515		0.0410767		0.521973		0.0376432		0.683113		0		0.0193114		0		0.386029		0.0902241
MET5-26 W R4		met5-26 w r4_bd7_01_54758.d.xms	1		0.194677		0.339659		0.0554044		0.10204		0		0.480806		0.410792		0.758403		7.08293		0.160652		0.0905608		0.123247		0.237619		0.493213		0.0428696		1.28681		0.096811		0.81047		0.00581756		0.0455651		0.0298671		0.0712705		0.156602
MET5-26 L2 R5		met5-26 l2 r5_bd8_01_54761.d.xms	1		1.36096		0.853542		0.512552		0.677851		0		0.244359		2.54056		9.69484		7.05672		1.87509		1.04549		1.80831		3.7718		4.37837		0.545857		12.7318		1.37663		2.1707		0		0.56434		0		0.725172		1.54278
MET5-26 EL3 R5		met5-26 el3 r5_be1_01_54762.d.xms	1		10.6775		10.8726		4.01783		6.17686		0.0160533		0		14.2894		79.564		21.8459		14.6249		13.0719		17.6406		31.8099		44.9531		6.98591		133.719		9.33878		17.5407		0		5.29753		0		7.68183		16.7204
MET5-26 LL3 R5		met5-26 ll3 r5_be2_01_54763.d.xms	1		19.5576		16.4524		5.71632		9.41389		0.0729279		0		25.3965		83.8821		58.4078		27.3157		11.0411		18.9948		25.811		102.051		12.9754		347.695		10.7074		24.9247		0.00138171		7.42274		0		12.7505		20.499
MET5-26 PW R5		met5-26 pw r5_be3_01_54764.d.xms	1		0.397279		0.185657		0.202618		0.0809309		0.00757345		0.522701		0.664438		1.60404		7.15242		0.554706		0.0543806		0.121643		0.523421		0.315824		0.0544089		2.43732		0.160824		1.04208		0		0.36514		0		0.982886		0.234625
MET5-26 PB R5		met5-26 pb r5_be4_01_54765.d.xms	1		0.170445		0.137007		0		0.0789264		0		0.653834		0.284004		0.482161		7.7103		0.0928511		0.00691066		0.0142172		0.131189		0		0.0250396		0.219518		0.179696		0.803629		0		0.0276702		0		0.551798		0.0609437
MET5-26 NW R5		met5-26 nw r5_be5_01_54766.d.xms	1		2.38201		2.1382		0.750017		1.01671		0		0.319573		4.0308		9.08815		10.6075		1.10811		0.768238		1.52491		3.12666		4.02435		0.850385		6.80389		0.901105		1.69258		0.00295507		0.330676		0		6.85245		1.82802
MET5-26 W R5		met5-26 w r5_be6_01_54767.d.xms	1		0.174281		0.250617		0		0.105199		0		0.59802		0.37235		0.687847		8.22343		0.142638		0.0236588		0.0157608		0.197331		0.288183		0.00316655		0.853659		0.100449		0.818921		0.00407179		0.00870057		0.0479421		0.0251011		0.0625898
MET6-26 L2 R6		met6-26 l2 r6_be7_01_54770.d.xms	1		3.21338		4.49665		1.01326		1.36324		0		0		5.46725		31.3484		5.87119		5.56873		5.77758		6.96695		13.2362		16.6025		3.25547		31.1726		3.26744		4.48786		0		3.13105		0		3.6294		6.03281
MET6-26 EL3 R6		met6-26 el3 r6_be8_01_54771.d.xms	1		8.26815		9.69711		2.83642		4.32383		0.00465058		0		9.83763		48.2968		18.6001		11.4485		7.57296		12.4149		16.9785		32.3317		4.05073		62.8581		7.05967		9.73325		0		3.14001		0		6.09389		10.7029
MET6-26 LL3 R6		met6-26 ll3 r6_ga1_01_54772.d.xms	1		13.1633		18.8599		6.77618		4.26868		0.0622654		0		22.7054		89.7565		38.3495		14.3871		6.08702		12.1707		27.0189		83.4455		9.62804		280.002		5.62009		19.1629		0		10.0814		0		29.0468		16.0541
MET6-26 PW R6		met6-26 pw r6_ga2_01_54773.d.xms	1		9.27668		3.02841		7.39918		2.63087		0.00407953		0		16.8128		42.206		47.7807		14.3229		2.19505		3.52705		11.2054		10.2391		1.75993		64.4971		2.99116		5.84245		0		7.52041		0		23.0206		7.48367
MET6-26 PB R6		met6-26 pb r6_ga3_01_54774.d.xms	1		3.56142		1.56189		0.657444		1.59571		0		0		8.37207		12.0621		3.42146		2.66944		1.24788		1.97393		3.41933		1.34558		1.17961		6.00893		1.3779		1.29632		0		2.49836		0		22.1615		1.62037
MET6-26 NW R6		met6-26 nw r6_ga4_01_54775.d.xms	1		6.27805		4.17126		1.92869		3.07207		0		0		10.0434		19.9996		7.76973		3.22472		1.65793		3.38497		6.22186		8.66459		2.00534		18.3397		2.58648		2.70466		0.00536504		1.89329		0		22.8083		4.3995
MET6-26 W R6		met6-26 w r6_ga5_01_54776.d.xms	1		0.316157		0.440227		0		0.146147		0		0.380371		0.792516		1.46586		8.69109		0.280102		0.0608873		0.0670962		0.438037		0.618521		0.00806167		2.10969		0.24171		0.705582		0.0175661		0.0162907		0.106604		0.128211		0.177017
MET6-26 L2 R7		met6-26 l2 r7_ga6_01_54779.d.xms	1		7.94716		7.95846		3.0376		1.4122		0.00688191		0		11.8037		37.0136		14.7039		9.01755		5.98635		9.79194		12.563		21.1786		3.12876		46.0067		4.62325		6.65232		0		3.38458		0		5.51851		7.8974
MET6-26 EL3 R7		met6-26 el3 r7_ga7_01_54780.d.xms	1		10.4402		10.1637		3.26601		4.29457		0.0066684		0		10.7802		63.9538		17.0946		20.8579		11.1211		15.713		23.2741		51.9669		5.37449		107.528		8.419		13.7761		0.00334895		6.16868		0		6.38809		13.6065
MET6-26 LL3 R7		met6-26 ll3 r7_ga8_01_54781.d.xms	1		43.576		27.0299		15.1232		15.1509		0.0449857		0		28.7625		235.401		149.165		45.8483		29.02		48.2715		71.8763		218.163		28.2914		422.634		42.9987		50.5666		0		15.6263		0		33.4343		48.4858
MET6-26 PW R7		met6-26 pw r7_gb1_01_54782.d.xms	1		8.88792		2.76333		5.4775		1.54928		0		0.0365065		14.286		35.4304		50.4881		12.9492		1.73036		2.95074		9.64646		11.1479		1.40454		52.4435		3.0036		5.54966		0.00322871		7.76704		0		23.355		6.9623
MET6-26 PB R7		met6-26 pb r7_gb2_01_54783.d.xms	1		3.71486		1.90218		0.493608		1.54877		0		0.0449693		9.64307		12.6416		7.04802		3.01028		1.51041		3.19997		3.08029		2.73754		1.79294		6.71697		2.29831		2.00363		0		5.30152		0		44.1674		2.96676
MET6-26 NW R7		met6-26 nw r7_gb3_01_54784.d.xms	1		7.18147		5.47458		2.08795		3.14216		0.011515		0		12.0113		23.5735		7.45442		3.74872		2.25023		4.1285		7.14146		10.3975		3.69423		20.3592		3.51075		3.23411		0.00754413		3.1058		0		36.2242		5.84336
MET6-26 W R7		met6-26 w r7_gb4_01_54785.d.xms	1		3.77317		2.91686		0.331812		2.04495		0		0.0232682		5.62205		8.19207		0		2.58448		0.697598		0.711414		2.50628		7.44971		0.209146		13.574		1.62953		1.45222		0.121505		0.162037		0.78456		0.866987		1.46904
MET6-26 L2 R8		met6-26 l2 r8_gb5_01_54788.d.xms	1		3.81483		4.27501		1.54544		1.98706		0		0.0258211		5.41155		24.8783		6.43609		6.02956		3.20903		5.99446		8.54184		15.3988		2.13592		30.4838		2.3285		4.11123		0		1.9124		0		3.12998		4.02777
MET6-26 EL3 R8		met6-26 el3 r8_gb6_01_54789.d.xms	1		8.48356		8.97584		2.9885		4.29796		0		0.0467144		10.3247		66.8702		27.0542		14.5031		9.7502		15.252		23.7997		36.5266		5.64814		84.2503		7.95501		12.4629		0		4.79297		0		8.42129		12.7939
MET6-26 LL3 R8		met6-26 ll3 r8_gb7_01_54790.d.xms	1		68.8597		45.7097		12.6895		19.3848		0.197372		0		47.0119		262.202		116.364		59.3348		29.3973		54.0078		74.9718		236.838		35.4033		612.664		6.91556		62.225		0		27.9062		0		33.8421		47.8814
MET6-26 PW R8		met6-26 pw r8_gb8_01_54791.d.xms	1		7.9203		1.89232		5.42452		1.81207		0		0.036462		13.9863		36.0412		44.0999		9.49398		1.90807		3.19221		9.90128		8.47732		1.3812		56.1243		2.87643		5.3509		0		7.25949		0		12.628		5.6348
MET6-26 PB R8		met6-26 pb r8_gc1_01_54792.d.xms	1		3.65115		1.94608		0.572955		1.79767		0		0.0418357		9.2212		11.1283		5.59091		3.30572		0.962987		2.27799		3.04766		2.28256		1.39615		7.3196		1.92483		2.06244		0		4.57016		0		37.3338		2.80175
MET6-26 NW R8		met6-26 nw r8_gc2_01_54793.d.xms	1		0.175785		0.188215		0		0.0897155		0.00486045		0.483563		0.32566		0.804143		7.77968		0.159804		0.0171464		0.0708669		0.261072		0.135903		0.0434817		0.620865		0.249848		0.724235		0		0.0693466		0		1.20768		0.148148
MET6-26 W R8		met6-26 w r8_gc3_01_54794.d.xms	1		3.6764		3.19949		0		1.67063		0.00634643		0		6.37043		8.57063		3.64258		2.36241		0.567079		0.357825		2.73631		7.5672		0.0901875		16.2223		1.58269		1.57538		0.0643782		0.110695		0.778575		1.8011		1.30335
MET1-26 L2 R9		met1-26 l2 r9_gc4_01_54797.d.xms	1		0.687916		1.73505		0.469527		0.4233		0		0.46039		1.85236		7.75461		8.09813		1.5432		1.04334		1.65991		3.20173		3.49493		0.418991		8.50766		0.39634		1.93316		0		0.397285		0		0.919615		1.33694
MET1-26 EL3 R9		met1-26 el3 r9_gc5_01_54798.d.xms	1		9.94247		11.4856		4.99147		6.94548		0.053851		0.0222464		13.1648		70.1302		18.2817		16.7973		8.72705		14.8737		25.1665		40.6643		4.70446		95.1525		4.11626		12.802		0		3.89763		0		4.38746		10.4108
MET1-26 LL3 R9		met1-26 ll3 r9_gc6_01_54799.d.xms	1		0.971866		1.4161		0.435779		0.288178		0.0117216		0.490945		1.01803		5.20207		8.43004		1.36735		0.804074		1.51288		1.88584		6.75333		0.695694		11.1797		1.24895		1.97293		0		0.300938		0		1.06652		1.35399
MET1-26 PW R9		met1-26 pw r9_gc7_01_54800.d.xms	1		1.11555		0.53161		0.921201		0.380859		0.0131542		0.542885		2.86997		7.42724		14.2834		2.13263		0.328891		0.531663		2.37199		1.61297		0.220398		10.8476		0.674556		1.6182		0		0.567846		0		2.14419		1.08077
MET1-26 PB R9		met1-26 pb r9_gc8_01_54801.d.xms	1		0.11686		0.0680933		0		0.0529636		0		0.576921		0.277419		0.387735		4.5772		0.0512618		0.00667767		0.0349989		0.0739435		0.0403499		0.0224529		0.218035		0.056205		0.600679		0		0.0678116		0		0.746611		0.0213281
MET1-26 NW R9		met1-26 nw r9_gd1_01_54802.d.xms	1		0.188827		0.186744		0.0601539		0.0915564		0		0.567964		0.407932		0.74184		5.96953		0.123899		0.0375934		0.102735		0.250705		0.267629		0.0639975		0.588596		0.106961		0.69641		0		0.0550338		0		0.734749		0.128801
MET1-26 W R9		met1-26 w r9_gd2_01_54803.d.xms	1		0.60251		0.693262		0		0.462603		0		0.303106		1.35804		2.45427		6.28279		0.701907		0.098942		0.0157594		0.903001		1.87657		0.0268067		4.44721		0.386136		0.585245		0.0259965		0.0151365		0.288515		0.0837733		0.169718
					NA		NA		NA		NA		NA		NA		NA		NA		NA		NA		NA		NA		NA		NA		NA		NA		NA		NA		NA		NA		NA		NA		NA
					NA		NA		NA		NA		NA		NA		NA		NA		NA		NA		NA		NA		NA		NA		NA		NA		NA		NA		NA		NA		NA		NA		NA
					NA		NA		NA		NA		NA		NA		NA		NA		NA		NA		NA		NA		NA		NA		NA		NA		NA		NA		NA		NA		NA		NA		NA
					NA		NA		NA		NA		NA		NA		NA		NA		NA		NA		NA		NA		NA		NA		NA		NA		NA		NA		NA		NA		NA		NA		NA
					NA		NA		NA		NA		NA		NA		NA		NA		NA		NA		NA		NA		NA		NA		NA		NA		NA		NA		NA		NA		NA		NA		NA
					NA		NA		NA		NA		NA		NA		NA		NA		NA		NA		NA		NA		NA		NA		NA		NA		NA		NA		NA		NA		NA		NA		NA
					NA		NA		NA		NA		NA		NA		NA		NA		NA		NA		NA		NA		NA		NA		NA		NA		NA		NA		NA		NA		NA		NA		NA
					NA		NA		NA		NA		NA		NA		NA		NA		NA		NA		NA		NA		NA		NA		NA		NA		NA		NA		NA		NA		NA		NA		NA
					NA		NA		NA		NA		NA		NA		NA		NA		NA		NA		NA		NA		NA		NA		NA		NA		NA		NA		NA		NA		NA		NA		NA
					NA		NA		NA		NA		NA		NA		NA		NA		NA		NA		NA		NA		NA		NA		NA		NA		NA		NA		NA		NA		NA		NA		NA
					NA		NA		NA		NA		NA		NA		NA		NA		NA		NA		NA		NA		NA		NA		NA		NA		NA		NA		NA		NA		NA		NA		NA
					NA		NA		NA		NA		NA		NA		NA		NA		NA		NA		NA		NA		NA		NA		NA		NA		NA		NA		NA		NA		NA		NA		NA
					NA		NA		NA		NA		NA		NA		NA		NA		NA		NA		NA		NA		NA		NA		NA		NA		NA		NA		NA		NA		NA		NA		NA
					NA		NA		NA		NA		NA		NA		NA		NA		NA		NA		NA		NA		NA		NA		NA		NA		NA		NA		NA		NA		NA		NA		NA
					NA		NA		NA		NA		NA		NA		NA		NA		NA		NA		NA		NA		NA		NA		NA		NA		NA		NA		NA		NA		NA		NA		NA
					NA		NA		NA		NA		NA		NA		NA		NA		NA		NA		NA		NA		NA		NA		NA		NA		NA		NA		NA		NA		NA		NA		NA
					NA		NA		NA		NA		NA		NA		NA		NA		NA		NA		NA		NA		NA		NA		NA		NA		NA		NA		NA		NA		NA		NA		NA
					NA		NA		NA		NA		NA		NA		NA		NA		NA		NA		NA		NA		NA		NA		NA		NA		NA		NA		NA		NA		NA		NA		NA
					NA		NA		NA		NA		NA		NA		NA		NA		NA		NA		NA		NA		NA		NA		NA		NA		NA		NA		NA		NA		NA		NA		NA
					NA		NA		NA		NA		NA		NA		NA		NA		NA		NA		NA		NA		NA		NA		NA		NA		NA		NA		NA		NA		NA		NA		NA
					NA		NA		NA		NA		NA		NA		NA		NA		NA		NA		NA		NA		NA		NA		NA		NA		NA		NA		NA		NA		NA		NA		NA
					NA		NA		NA		NA		NA		NA		NA		NA		NA		NA		NA		NA		NA		NA		NA		NA		NA		NA		NA		NA		NA		NA		NA
					NA		NA		NA		NA		NA		NA		NA		NA		NA		NA		NA		NA		NA		NA		NA		NA		NA		NA		NA		NA		NA		NA		NA
					NA		NA		NA		NA		NA		NA		NA		NA		NA		NA		NA		NA		NA		NA		NA		NA		NA		NA		NA		NA		NA		NA		NA
					NA		NA		NA		NA		NA		NA		NA		NA		NA		NA		NA		NA		NA		NA		NA		NA		NA		NA		NA		NA		NA		NA		NA
					NA		NA		NA		NA		NA		NA		NA		NA		NA		NA		NA		NA		NA		NA		NA		NA		NA		NA		NA		NA		NA		NA		NA
					NA		NA		NA		NA		NA		NA		NA		NA		NA		NA		NA		NA		NA		NA		NA		NA		NA		NA		NA		NA		NA		NA		NA
					NA		NA		NA		NA		NA		NA		NA		NA		NA		NA		NA		NA		NA		NA		NA		NA		NA		NA		NA		NA		NA		NA		NA
					NA		NA		NA		NA		NA		NA		NA		NA		NA		NA		NA		NA		NA		NA		NA		NA		NA		NA		NA		NA		NA		NA		NA
					NA		NA		NA		NA		NA		NA		NA		NA		NA		NA		NA		NA		NA		NA		NA		NA		NA		NA		NA		NA		NA		NA		NA
					NA		NA		NA		NA		NA		NA		NA		NA		NA		NA		NA		NA		NA		NA		NA		NA		NA		NA		NA		NA		NA		NA		NA
					NA		NA		NA		NA		NA		NA		NA		NA		NA		NA		NA		NA		NA		NA		NA		NA		NA		NA		NA		NA		NA		NA		NA
					NA		NA		NA		NA		NA		NA		NA		NA		NA		NA		NA		NA		NA		NA		NA		NA		NA		NA		NA		NA		NA		NA		NA
					NA		NA		NA		NA		NA		NA		NA		NA		NA		NA		NA		NA		NA		NA		NA		NA		NA		NA		NA		NA		NA		NA		NA
					NA		NA		NA		NA		NA		NA		NA		NA		NA		NA		NA		NA		NA		NA		NA		NA		NA		NA		NA		NA		NA		NA		NA
					NA		NA		NA		NA		NA		NA		NA		NA		NA		NA		NA		NA		NA		NA		NA		NA		NA		NA		NA		NA		NA		NA		NA
					NA		NA		NA		NA		NA		NA		NA		NA		NA		NA		NA		NA		NA		NA		NA		NA		NA		NA		NA		NA		NA		NA		NA
					NA		NA		NA		NA		NA		NA		NA		NA		NA		NA		NA		NA		NA		NA		NA		NA		NA		NA		NA		NA		NA		NA		NA
					NA		NA		NA		NA		NA		NA		NA		NA		NA		NA		NA		NA		NA		NA		NA		NA		NA		NA		NA		NA		NA		NA		NA
					NA		NA		NA		NA		NA		NA		NA		NA		NA		NA		NA		NA		NA		NA		NA		NA		NA		NA		NA		NA		NA		NA		NA
					NA		NA		NA		NA		NA		NA		NA		NA		NA		NA		NA		NA		NA		NA		NA		NA		NA		NA		NA		NA		NA		NA		NA
					NA		NA		NA		NA		NA		NA		NA		NA		NA		NA		NA		NA		NA		NA		NA		NA		NA		NA		NA		NA		NA		NA		NA
					NA		NA		NA		NA		NA		NA		NA		NA		NA		NA		NA		NA		NA		NA		NA		NA		NA		NA		NA		NA		NA		NA		NA
					NA		NA		NA		NA		NA		NA		NA		NA		NA		NA		NA		NA		NA		NA		NA		NA		NA		NA		NA		NA		NA		NA		NA
					NA		NA		NA		NA		NA		NA		NA		NA		NA		NA		NA		NA		NA		NA		NA		NA		NA		NA		NA		NA		NA		NA		NA
					NA		NA		NA		NA		NA		NA		NA		NA		NA		NA		NA		NA		NA		NA		NA		NA		NA		NA		NA		NA		NA		NA		NA
					NA		NA		NA		NA		NA		NA		NA		NA		NA		NA		NA		NA		NA		NA		NA		NA		NA		NA		NA		NA		NA		NA		NA
					NA		NA		NA		NA		NA		NA		NA		NA		NA		NA		NA		NA		NA		NA		NA		NA		NA		NA		NA		NA		NA		NA		NA
					NA		NA		NA		NA		NA		NA		NA		NA		NA		NA		NA		NA		NA		NA		NA		NA		NA		NA		NA		NA		NA		NA		NA
					NA		NA		NA		NA		NA		NA		NA		NA		NA		NA		NA		NA		NA		NA		NA		NA		NA		NA		NA		NA		NA		NA		NA
					NA		NA		NA		NA		NA		NA		NA		NA		NA		NA		NA		NA		NA		NA		NA		NA		NA		NA		NA		NA		NA		NA		NA
					NA		NA		NA		NA		NA		NA		NA		NA		NA		NA		NA		NA		NA		NA		NA		NA		NA		NA		NA		NA		NA		NA		NA
					NA		NA		NA		NA		NA		NA		NA		NA		NA		NA		NA		NA		NA		NA		NA		NA		NA		NA		NA		NA		NA		NA		NA
					NA		NA		NA		NA		NA		NA		NA		NA		NA		NA		NA		NA		NA		NA		NA		NA		NA		NA		NA		NA		NA		NA		NA
					NA		NA		NA		NA		NA		NA		NA		NA		NA		NA		NA		NA		NA		NA		NA		NA		NA		NA		NA		NA		NA		NA		NA
					NA		NA		NA		NA		NA		NA		NA		NA		NA		NA		NA		NA		NA		NA		NA		NA		NA		NA		NA		NA		NA		NA		NA
					NA		NA		NA		NA		NA		NA		NA		NA		NA		NA		NA		NA		NA		NA		NA		NA		NA		NA		NA		NA		NA		NA		NA
					NA		NA		NA		NA		NA		NA		NA		NA		NA		NA		NA		NA		NA		NA		NA		NA		NA		NA		NA		NA		NA		NA		NA
					NA		NA		NA		NA		NA		NA		NA		NA		NA		NA		NA		NA		NA		NA		NA		NA		NA		NA		NA		NA		NA		NA		NA
					NA		NA		NA		NA		NA		NA		NA		NA		NA		NA		NA		NA		NA		NA		NA		NA		NA		NA		NA		NA		NA		NA		NA
					NA		NA		NA		NA		NA		NA		NA		NA		NA		NA		NA		NA		NA		NA		NA		NA		NA		NA		NA		NA		NA		NA		NA
					NA		NA		NA		NA		NA		NA		NA		NA		NA		NA		NA		NA		NA		NA		NA		NA		NA		NA		NA		NA		NA		NA		NA
					NA		NA		NA		NA		NA		NA		NA		NA		NA		NA		NA		NA		NA		NA		NA		NA		NA		NA		NA		NA		NA		NA		NA
					NA		NA		NA		NA		NA		NA		NA		NA		NA		NA		NA		NA		NA		NA		NA		NA		NA		NA		NA		NA		NA		NA		NA
					NA		NA		NA		NA		NA		NA		NA		NA		NA		NA		NA		NA		NA		NA		NA		NA		NA		NA		NA		NA		NA		NA		NA
					NA		NA		NA		NA		NA		NA		NA		NA		NA		NA		NA		NA		NA		NA		NA		NA		NA		NA		NA		NA		NA		NA		NA
					NA		NA		NA		NA		NA		NA		NA		NA		NA		NA		NA		NA		NA		NA		NA		NA		NA		NA		NA		NA		NA		NA		NA
					NA		NA		NA		NA		NA		NA		NA		NA		NA		NA		NA		NA		NA		NA		NA		NA		NA		NA		NA		NA		NA		NA		NA
					NA		NA		NA		NA		NA		NA		NA		NA		NA		NA		NA		NA		NA		NA		NA		NA		NA		NA		NA		NA		NA		NA		NA
					NA		NA		NA		NA		NA		NA		NA		NA		NA		NA		NA		NA		NA		NA		NA		NA		NA		NA		NA		NA		NA		NA		NA
					NA		NA		NA		NA		NA		NA		NA		NA		NA		NA		NA		NA		NA		NA		NA		NA		NA		NA		NA		NA		NA		NA		NA
					NA		NA		NA		NA		NA		NA		NA		NA		NA		NA		NA		NA		NA		NA		NA		NA		NA		NA		NA		NA		NA		NA		NA
					NA		NA		NA		NA		NA		NA		NA		NA		NA		NA		NA		NA		NA		NA		NA		NA		NA		NA		NA		NA		NA		NA		NA
					NA		NA		NA		NA		NA		NA		NA		NA		NA		NA		NA		NA		NA		NA		NA		NA		NA		NA		NA		NA		NA		NA		NA
					NA		NA		NA		NA		NA		NA		NA		NA		NA		NA		NA		NA		NA		NA		NA		NA		NA		NA		NA		NA		NA		NA		NA
					NA		NA		NA		NA		NA		NA		NA		NA		NA		NA		NA		NA		NA		NA		NA		NA		NA		NA		NA		NA		NA		NA		NA
					NA		NA		NA		NA		NA		NA		NA		NA		NA		NA		NA		NA		NA		NA		NA		NA		NA		NA		NA		NA		NA		NA		NA
					NA		NA		NA		NA		NA		NA		NA		NA		NA		NA		NA		NA		NA		NA		NA		NA		NA		NA		NA		NA		NA		NA		NA
					NA		NA		NA		NA		NA		NA		NA		NA		NA		NA		NA		NA		NA		NA		NA		NA		NA		NA		NA		NA		NA		NA		NA
					NA		NA		NA		NA		NA		NA		NA		NA		NA		NA		NA		NA		NA		NA		NA		NA		NA		NA		NA		NA		NA		NA		NA
					NA		NA		NA		NA		NA		NA		NA		NA		NA		NA		NA		NA		NA		NA		NA		NA		NA		NA		NA		NA		NA		NA		NA
					NA		NA		NA		NA		NA		NA		NA		NA		NA		NA		NA		NA		NA		NA		NA		NA		NA		NA		NA		NA		NA		NA		NA
					NA		NA		NA		NA		NA		NA		NA		NA		NA		NA		NA		NA		NA		NA		NA		NA		NA		NA		NA		NA		NA		NA		NA
					NA		NA		NA		NA		NA		NA		NA		NA		NA		NA		NA		NA		NA		NA		NA		NA		NA		NA		NA		NA		NA		NA		NA
					NA		NA		NA		NA		NA		NA		NA		NA		NA		NA		NA		NA		NA		NA		NA		NA		NA		NA		NA		NA		NA		NA		NA
					NA		NA		NA		NA		NA		NA		NA		NA		NA		NA		NA		NA		NA		NA		NA		NA		NA		NA		NA		NA		NA		NA		NA
					NA		NA		NA		NA		NA		NA		NA		NA		NA		NA		NA		NA		NA		NA		NA		NA		NA		NA		NA		NA		NA		NA		NA
					NA		NA		NA		NA		NA		NA		NA		NA		NA		NA		NA		NA		NA		NA		NA		NA		NA		NA		NA		NA		NA		NA		NA
					NA		NA		NA		NA		NA		NA		NA		NA		NA		NA		NA		NA		NA		NA		NA		NA		NA		NA		NA		NA		NA		NA		NA
					NA		NA		NA		NA		NA		NA		NA		NA		NA		NA		NA		NA		NA		NA		NA		NA		NA		NA		NA		NA		NA		NA		NA
					NA		NA		NA		NA		NA		NA		NA		NA		NA		NA		NA		NA		NA		NA		NA		NA		NA		NA		NA		NA		NA		NA		NA
					NA		NA		NA		NA		NA		NA		NA		NA		NA		NA		NA		NA		NA		NA		NA		NA		NA		NA		NA		NA		NA		NA		NA
					NA		NA		NA		NA		NA		NA		NA		NA		NA		NA		NA		NA		NA		NA		NA		NA		NA		NA		NA		NA		NA		NA		NA
					NA		NA		NA		NA		NA		NA		NA		NA		NA		NA		NA		NA		NA		NA		NA		NA		NA		NA		NA		NA		NA		NA		NA
					NA		NA		NA		NA		NA		NA		NA		NA		NA		NA		NA		NA		NA		NA		NA		NA		NA		NA		NA		NA		NA		NA		NA
					NA		NA		NA		NA		NA		NA		NA		NA		NA		NA		NA		NA		NA		NA		NA		NA		NA		NA		NA		NA		NA		NA		NA
					NA		NA		NA		NA		NA		NA		NA		NA		NA		NA		NA		NA		NA		NA		NA		NA		NA		NA		NA		NA		NA		NA		NA
					NA		NA		NA		NA		NA		NA		NA		NA		NA		NA		NA		NA		NA		NA		NA		NA		NA		NA		NA		NA		NA		NA		NA
					NA		NA		NA		NA		NA		NA		NA		NA		NA		NA		NA		NA		NA		NA		NA		NA		NA		NA		NA		NA		NA		NA		NA
					NA		NA		NA		NA		NA		NA		NA		NA		NA		NA		NA		NA		NA		NA		NA		NA		NA		NA		NA		NA		NA		NA		NA
					NA		NA		NA		NA		NA		NA		NA		NA		NA		NA		NA		NA		NA		NA		NA		NA		NA		NA		NA		NA		NA		NA		NA
					NA		NA		NA		NA		NA		NA		NA		NA		NA		NA		NA		NA		NA		NA		NA		NA		NA		NA		NA		NA		NA		NA		NA
					NA		NA		NA		NA		NA		NA		NA		NA		NA		NA		NA		NA		NA		NA		NA		NA		NA		NA		NA		NA		NA		NA		NA
					NA		NA		NA		NA		NA		NA		NA		NA		NA		NA		NA		NA		NA		NA		NA		NA		NA		NA		NA		NA		NA		NA		NA
					NA		NA		NA		NA		NA		NA		NA		NA		NA		NA		NA		NA		NA		NA		NA		NA		NA		NA		NA		NA		NA		NA		NA
					NA		NA		NA		NA		NA		NA		NA		NA		NA		NA		NA		NA		NA		NA		NA		NA		NA		NA		NA		NA		NA		NA		NA
					NA		NA		NA		NA		NA		NA		NA		NA		NA		NA		NA		NA		NA		NA		NA		NA		NA		NA		NA		NA		NA		NA		NA
					NA		NA		NA		NA		NA		NA		NA		NA		NA		NA		NA		NA		NA		NA		NA		NA		NA		NA		NA		NA		NA		NA		NA
					NA		NA		NA		NA		NA		NA		NA		NA		NA		NA		NA		NA		NA		NA		NA		NA		NA		NA		NA		NA		NA		NA		NA
					NA		NA		NA		NA		NA		NA		NA		NA		NA		NA		NA		NA		NA		NA		NA		NA		NA		NA		NA		NA		NA		NA		NA
					NA		NA		NA		NA		NA		NA		NA		NA		NA		NA		NA		NA		NA		NA		NA		NA		NA		NA		NA		NA		NA		NA		NA
					NA		NA		NA		NA		NA		NA		NA		NA		NA		NA		NA		NA		NA		NA		NA		NA		NA		NA		NA		NA		NA		NA		NA
					NA		NA		NA		NA		NA		NA		NA		NA		NA		NA		NA		NA		NA		NA		NA		NA		NA		NA		NA		NA		NA		NA		NA
					NA		NA		NA		NA		NA		NA		NA		NA		NA		NA		NA		NA		NA		NA		NA		NA		NA		NA		NA		NA		NA		NA		NA
					NA		NA		NA		NA		NA		NA		NA		NA		NA		NA		NA		NA		NA		NA		NA		NA		NA		NA		NA		NA		NA		NA		NA
					NA		NA		NA		NA		NA		NA		NA		NA		NA		NA		NA		NA		NA		NA		NA		NA		NA		NA		NA		NA		NA		NA		NA
					NA		NA		NA		NA		NA		NA		NA		NA		NA		NA		NA		NA		NA		NA		NA		NA		NA		NA		NA		NA		NA		NA		NA
					NA		NA		NA		NA		NA		NA		NA		NA		NA		NA		NA		NA		NA		NA		NA		NA		NA		NA		NA		NA		NA		NA		NA
					NA		NA		NA		NA		NA		NA		NA		NA		NA		NA		NA		NA		NA		NA		NA		NA		NA		NA		NA		NA		NA		NA		NA
					NA		NA		NA		NA		NA		NA		NA		NA		NA		NA		NA		NA		NA		NA		NA		NA		NA		NA		NA		NA		NA		NA		NA
					NA		NA		NA		NA		NA		NA		NA		NA		NA		NA		NA		NA		NA		NA		NA		NA		NA		NA		NA		NA		NA		NA		NA
					NA		NA		NA		NA		NA		NA		NA		NA		NA		NA		NA		NA		NA		NA		NA		NA		NA		NA		NA		NA		NA		NA		NA
					NA		NA		NA		NA		NA		NA		NA		NA		NA		NA		NA		NA		NA		NA		NA		NA		NA		NA		NA		NA		NA		NA		NA
					NA		NA		NA		NA		NA		NA		NA		NA		NA		NA		NA		NA		NA		NA		NA		NA		NA		NA		NA		NA		NA		NA		NA
					NA		NA		NA		NA		NA		NA		NA		NA		NA		NA		NA		NA		NA		NA		NA		NA		NA		NA		NA		NA		NA		NA		NA
					NA		NA		NA		NA		NA		NA		NA		NA		NA		NA		NA		NA		NA		NA		NA		NA		NA		NA		NA		NA		NA		NA		NA
					NA		NA		NA		NA		NA		NA		NA		NA		NA		NA		NA		NA		NA		NA		NA		NA		NA		NA		NA		NA		NA		NA		NA
					NA		NA		NA		NA		NA		NA		NA		NA		NA		NA		NA		NA		NA		NA		NA		NA		NA		NA		NA		NA		NA		NA		NA
					NA		NA		NA		NA		NA		NA		NA		NA		NA		NA		NA		NA		NA		NA		NA		NA		NA		NA		NA		NA		NA		NA		NA
					NA		NA		NA		NA		NA		NA		NA		NA		NA		NA		NA		NA		NA		NA		NA		NA		NA		NA		NA		NA		NA		NA		NA
					NA		NA		NA		NA		NA		NA		NA		NA		NA		NA		NA		NA		NA		NA		NA		NA		NA		NA		NA		NA		NA		NA		NA
					NA		NA		NA		NA		NA		NA		NA		NA		NA		NA		NA		NA		NA		NA		NA		NA		NA		NA		NA		NA		NA		NA		NA
					NA		NA		NA		NA		NA		NA		NA		NA		NA		NA		NA		NA		NA		NA		NA		NA		NA		NA		NA		NA		NA		NA		NA
					NA		NA		NA		NA		NA		NA		NA		NA		NA		NA		NA		NA		NA		NA		NA		NA		NA		NA		NA		NA		NA		NA		NA
					NA		NA		NA		NA		NA		NA		NA		NA		NA		NA		NA		NA		NA		NA		NA		NA		NA		NA		NA		NA		NA		NA		NA
					NA		NA		NA		NA		NA		NA		NA		NA		NA		NA		NA		NA		NA		NA		NA		NA		NA		NA		NA		NA		NA		NA		NA
					NA		NA		NA		NA		NA		NA		NA		NA		NA		NA		NA		NA		NA		NA		NA		NA		NA		NA		NA		NA		NA		NA		NA
					NA		NA		NA		NA		NA		NA		NA		NA		NA		NA		NA		NA		NA		NA		NA		NA		NA		NA		NA		NA		NA		NA		NA
					NA		NA		NA		NA		NA		NA		NA		NA		NA		NA		NA		NA		NA		NA		NA		NA		NA		NA		NA		NA		NA		NA		NA
					NA		NA		NA		NA		NA		NA		NA		NA		NA		NA		NA		NA		NA		NA		NA		NA		NA		NA		NA		NA		NA		NA		NA
					NA		NA		NA		NA		NA		NA		NA		NA		NA		NA		NA		NA		NA		NA		NA		NA		NA		NA		NA		NA		NA		NA		NA
					NA		NA		NA		NA		NA		NA		NA		NA		NA		NA		NA		NA		NA		NA		NA		NA		NA		NA		NA		NA		NA		NA		NA
					NA		NA		NA		NA		NA		NA		NA		NA		NA		NA		NA		NA		NA		NA		NA		NA		NA		NA		NA		NA		NA		NA		NA
					NA		NA		NA		NA		NA		NA		NA		NA		NA		NA		NA		NA		NA		NA		NA		NA		NA		NA		NA		NA		NA		NA		NA
					NA		NA		NA		NA		NA		NA		NA		NA		NA		NA		NA		NA		NA		NA		NA		NA		NA		NA		NA		NA		NA		NA		NA
					NA		NA		NA		NA		NA		NA		NA		NA		NA		NA		NA		NA		NA		NA		NA		NA		NA		NA		NA		NA		NA		NA		NA
					NA		NA		NA		NA		NA		NA		NA		NA		NA		NA		NA		NA		NA		NA		NA		NA		NA		NA		NA		NA		NA		NA		NA
					NA		NA		NA		NA		NA		NA		NA		NA		NA		NA		NA		NA		NA		NA		NA		NA		NA		NA		NA		NA		NA		NA		NA
					NA		NA		NA		NA		NA		NA		NA		NA		NA		NA		NA		NA		NA		NA		NA		NA		NA		NA		NA		NA		NA		NA		NA
					NA		NA		NA		NA		NA		NA		NA		NA		NA		NA		NA		NA		NA		NA		NA		NA		NA		NA		NA		NA		NA		NA		NA
					NA		NA		NA		NA		NA		NA		NA		NA		NA		NA		NA		NA		NA		NA		NA		NA		NA		NA		NA		NA		NA		NA		NA
					NA		NA		NA		NA		NA		NA		NA		NA		NA		NA		NA		NA		NA		NA		NA		NA		NA		NA		NA		NA		NA		NA		NA
					NA		NA		NA		NA		NA		NA		NA		NA		NA		NA		NA		NA		NA		NA		NA		NA		NA		NA		NA		NA		NA		NA		NA
					NA		NA		NA		NA		NA		NA		NA		NA		NA		NA		NA		NA		NA		NA		NA		NA		NA		NA		NA		NA		NA		NA		NA
					NA		NA		NA		NA		NA		NA		NA		NA		NA		NA		NA		NA		NA		NA		NA		NA		NA		NA		NA		NA		NA		NA		NA
					NA		NA		NA		NA		NA		NA		NA		NA		NA		NA		NA		NA		NA		NA		NA		NA		NA		NA		NA		NA		NA		NA		NA
					NA		NA		NA		NA		NA		NA		NA		NA		NA		NA		NA		NA		NA		NA		NA		NA		NA		NA		NA		NA		NA		NA		NA
					NA		NA		NA		NA		NA		NA		NA		NA		NA		NA		NA		NA		NA		NA		NA		NA		NA		NA		NA		NA		NA		NA		NA
					NA		NA		NA		NA		NA		NA		NA		NA		NA		NA		NA		NA		NA		NA		NA		NA		NA		NA		NA		NA		NA		NA		NA
					NA		NA		NA		NA		NA		NA		NA		NA		NA		NA		NA		NA		NA		NA		NA		NA		NA		NA		NA		NA		NA		NA		NA
					NA		NA		NA		NA		NA		NA		NA		NA		NA		NA		NA		NA		NA		NA		NA		NA		NA		NA		NA		NA		NA		NA		NA
					NA		NA		NA		NA		NA		NA		NA		NA		NA		NA		NA		NA		NA		NA		NA		NA		NA		NA		NA		NA		NA		NA		NA
					NA		NA		NA		NA		NA		NA		NA		NA		NA		NA		NA		NA		NA		NA		NA		NA		NA		NA		NA		NA		NA		NA		NA
					NA		NA		NA		NA		NA		NA		NA		NA		NA		NA		NA		NA		NA		NA		NA		NA		NA		NA		NA		NA		NA		NA		NA
					NA		NA		NA		NA		NA		NA		NA		NA		NA		NA		NA		NA		NA		NA		NA		NA		NA		NA		NA		NA		NA		NA		NA
					NA		NA		NA		NA		NA		NA		NA		NA		NA		NA		NA		NA		NA		NA		NA		NA		NA		NA		NA		NA		NA		NA		NA
					NA		NA		NA		NA		NA		NA		NA		NA		NA		NA		NA		NA		NA		NA		NA		NA		NA		NA		NA		NA		NA		NA		NA
					NA		NA		NA		NA		NA		NA		NA		NA		NA		NA		NA		NA		NA		NA		NA		NA		NA		NA		NA		NA		NA		NA		NA
					NA		NA		NA		NA		NA		NA		NA		NA		NA		NA		NA		NA		NA		NA		NA		NA		NA		NA		NA		NA		NA		NA		NA
					NA		NA		NA		NA		NA		NA		NA		NA		NA		NA		NA		NA		NA		NA		NA		NA		NA		NA		NA		NA		NA		NA		NA
					NA		NA		NA		NA		NA		NA		NA		NA		NA		NA		NA		NA		NA		NA		NA		NA		NA		NA		NA		NA		NA		NA		NA
					NA		NA		NA		NA		NA		NA		NA		NA		NA		NA		NA		NA		NA		NA		NA		NA		NA		NA		NA		NA		NA		NA		NA
					NA		NA		NA		NA		NA		NA		NA		NA		NA		NA		NA		NA		NA		NA		NA		NA		NA		NA		NA		NA		NA		NA		NA
					NA		NA		NA		NA		NA		NA		NA		NA		NA		NA		NA		NA		NA		NA		NA		NA		NA		NA		NA		NA		NA		NA		NA
					NA		NA		NA		NA		NA		NA		NA		NA		NA		NA		NA		NA		NA		NA		NA		NA		NA		NA		NA		NA		NA		NA		NA
					NA		NA		NA		NA		NA		NA		NA		NA		NA		NA		NA		NA		NA		NA		NA		NA		NA		NA		NA		NA		NA		NA		NA
					NA		NA		NA		NA		NA		NA		NA		NA		NA		NA		NA		NA		NA		NA		NA		NA		NA		NA		NA		NA		NA		NA		NA
					NA		NA		NA		NA		NA		NA		NA		NA		NA		NA		NA		NA		NA		NA		NA		NA		NA		NA		NA		NA		NA		NA		NA
					NA		NA		NA		NA		NA		NA		NA		NA		NA		NA		NA		NA		NA		NA		NA		NA		NA		NA		NA		NA		NA		NA		NA
					NA		NA		NA		NA		NA		NA		NA		NA		NA		NA		NA		NA		NA		NA		NA		NA		NA		NA		NA		NA		NA		NA		NA
					NA		NA		NA		NA		NA		NA		NA		NA		NA		NA		NA		NA		NA		NA		NA		NA		NA		NA		NA		NA		NA		NA		NA
					NA		NA		NA		NA		NA		NA		NA		NA		NA		NA		NA		NA		NA		NA		NA		NA		NA		NA		NA		NA		NA		NA		NA
					NA		NA		NA		NA		NA		NA		NA		NA		NA		NA		NA		NA		NA		NA		NA		NA		NA		NA		NA		NA		NA		NA		NA
					NA		NA		NA		NA		NA		NA		NA		NA		NA		NA		NA		NA		NA		NA		NA		NA		NA		NA		NA		NA		NA		NA		NA
					NA		NA		NA		NA		NA		NA		NA		NA		NA		NA		NA		NA		NA		NA		NA		NA		NA		NA		NA		NA		NA		NA		NA
					NA		NA		NA		NA		NA		NA		NA		NA		NA		NA		NA		NA		NA		NA		NA		NA		NA		NA		NA		NA		NA		NA		NA
					NA		NA		NA		NA		NA		NA		NA		NA		NA		NA		NA		NA		NA		NA		NA		NA		NA		NA		NA		NA		NA		NA		NA
					NA		NA		NA		NA		NA		NA		NA		NA		NA		NA		NA		NA		NA		NA		NA		NA		NA		NA		NA		NA		NA		NA		NA
					NA		NA		NA		NA		NA		NA		NA		NA		NA		NA		NA		NA		NA		NA		NA		NA		NA		NA		NA		NA		NA		NA		NA
					NA		NA		NA		NA		NA		NA		NA		NA		NA		NA		NA		NA		NA		NA		NA		NA		NA		NA		NA		NA		NA		NA		NA
					NA		NA		NA		NA		NA		NA		NA		NA		NA		NA		NA		NA		NA		NA		NA		NA		NA		NA		NA		NA		NA		NA		NA
					NA		NA		NA		NA		NA		NA		NA		NA		NA		NA		NA		NA		NA		NA		NA		NA		NA		NA		NA		NA		NA		NA		NA
					NA		NA		NA		NA		NA		NA		NA		NA		NA		NA		NA		NA		NA		NA		NA		NA		NA		NA		NA		NA		NA		NA		NA
					NA		NA		NA		NA		NA		NA		NA		NA		NA		NA		NA		NA		NA		NA		NA		NA		NA		NA		NA		NA		NA		NA		NA
					NA		NA		NA		NA		NA		NA		NA		NA		NA		NA		NA		NA		NA		NA		NA		NA		NA		NA		NA		NA		NA		NA		NA
					NA		NA		NA		NA		NA		NA		NA		NA		NA		NA		NA		NA		NA		NA		NA		NA		NA		NA		NA		NA		NA		NA		NA
					NA		NA		NA		NA		NA		NA		NA		NA		NA		NA		NA		NA		NA		NA		NA		NA		NA		NA		NA		NA		NA		NA		NA
					NA		NA		NA		NA		NA		NA		NA		NA		NA		NA		NA		NA		NA		NA		NA		NA		NA		NA		NA		NA		NA		NA		NA
					NA		NA		NA		NA		NA		NA		NA		NA		NA		NA		NA		NA		NA		NA		NA		NA		NA		NA		NA		NA		NA		NA		NA
					NA		NA		NA		NA		NA		NA		NA		NA		NA		NA		NA		NA		NA		NA		NA		NA		NA		NA		NA		NA		NA		NA		NA
					NA		NA		NA		NA		NA		NA		NA		NA		NA		NA		NA		NA		NA		NA		NA		NA		NA		NA		NA		NA		NA		NA		NA
					NA		NA		NA		NA		NA		NA		NA		NA		NA		NA		NA		NA		NA		NA		NA		NA		NA		NA		NA		NA		NA		NA		NA
					NA		NA		NA		NA		NA		NA		NA		NA		NA		NA		NA		NA		NA		NA		NA		NA		NA		NA		NA		NA		NA		NA		NA
					NA		NA		NA		NA		NA		NA		NA		NA		NA		NA		NA		NA		NA		NA		NA		NA		NA		NA		NA		NA		NA		NA		NA
					NA		NA		NA		NA		NA		NA		NA		NA		NA		NA		NA		NA		NA		NA		NA		NA		NA		NA		NA		NA		NA		NA		NA
					NA		NA		NA		NA		NA		NA		NA		NA		NA		NA		NA		NA		NA		NA		NA		NA		NA		NA		NA		NA		NA		NA		NA
					NA		NA		NA		NA		NA		NA		NA		NA		NA		NA		NA		NA		NA		NA		NA		NA		NA		NA		NA		NA		NA		NA		NA
					NA		NA		NA		NA		NA		NA		NA		NA		NA		NA		NA		NA		NA		NA		NA		NA		NA		NA		NA		NA		NA		NA		NA
					NA		NA		NA		NA		NA		NA		NA		NA		NA		NA		NA		NA		NA		NA		NA		NA		NA		NA		NA		NA		NA		NA		NA
					NA		NA		NA		NA		NA		NA		NA		NA		NA		NA		NA		NA		NA		NA		NA		NA		NA		NA		NA		NA		NA		NA		NA
					NA		NA		NA		NA		NA		NA		NA		NA		NA		NA		NA		NA		NA		NA		NA		NA		NA		NA		NA		NA		NA		NA		NA
					NA		NA		NA		NA		NA		NA		NA		NA		NA		NA		NA		NA		NA		NA		NA		NA		NA		NA		NA		NA		NA		NA		NA
					NA		NA		NA		NA		NA		NA		NA		NA		NA		NA		NA		NA		NA		NA		NA		NA		NA		NA		NA		NA		NA		NA		NA
					NA		NA		NA		NA		NA		NA		NA		NA		NA		NA		NA		NA		NA		NA		NA		NA		NA		NA		NA		NA		NA		NA		NA
					NA		NA		NA		NA		NA		NA		NA		NA		NA		NA		NA		NA		NA		NA		NA		NA		NA		NA		NA		NA		NA		NA		NA
					NA		NA		NA		NA		NA		NA		NA		NA		NA		NA		NA		NA		NA		NA		NA		NA		NA		NA		NA		NA		NA		NA		NA
					NA		NA		NA		NA		NA		NA		NA		NA		NA		NA		NA		NA		NA		NA		NA		NA		NA		NA		NA		NA		NA		NA		NA
					NA		NA		NA		NA		NA		NA		NA		NA		NA		NA		NA		NA		NA		NA		NA		NA		NA		NA		NA		NA		NA		NA		NA
					NA		NA		NA		NA		NA		NA		NA		NA		NA		NA		NA		NA		NA		NA		NA		NA		NA		NA		NA		NA		NA		NA		NA
					NA		NA		NA		NA		NA		NA		NA		NA		NA		NA		NA		NA		NA		NA		NA		NA		NA		NA		NA		NA		NA		NA		NA
					NA		NA		NA		NA		NA		NA		NA		NA		NA		NA		NA		NA		NA		NA		NA		NA		NA		NA		NA		NA		NA		NA		NA
					NA		NA		NA		NA		NA		NA		NA		NA		NA		NA		NA		NA		NA		NA		NA		NA		NA		NA		NA		NA		NA		NA		NA
					NA		NA		NA		NA		NA		NA		NA		NA		NA		NA		NA		NA		NA		NA		NA		NA		NA		NA		NA		NA		NA		NA		NA
					NA		NA		NA		NA		NA		NA		NA		NA		NA		NA		NA		NA		NA		NA		NA		NA		NA		NA		NA		NA		NA		NA		NA
					NA		NA		NA		NA		NA		NA		NA		NA		NA		NA		NA		NA		NA		NA		NA		NA		NA		NA		NA		NA		NA		NA		NA
					NA		NA		NA		NA		NA		NA		NA		NA		NA		NA		NA		NA		NA		NA		NA		NA		NA		NA		NA		NA		NA		NA		NA
					NA		NA		NA		NA		NA		NA		NA		NA		NA		NA		NA		NA		NA		NA		NA		NA		NA		NA		NA		NA		NA		NA		NA
					NA		NA		NA		NA		NA		NA		NA		NA		NA		NA		NA		NA		NA		NA		NA		NA		NA		NA		NA		NA		NA		NA		NA
					NA		NA		NA		NA		NA		NA		NA		NA		NA		NA		NA		NA		NA		NA		NA		NA		NA		NA		NA		NA		NA		NA		NA
					NA		NA		NA		NA		NA		NA		NA		NA		NA		NA		NA		NA		NA		NA		NA		NA		NA		NA		NA		NA		NA		NA		NA
					NA		NA		NA		NA		NA		NA		NA		NA		NA		NA		NA		NA		NA		NA		NA		NA		NA		NA		NA		NA		NA		NA		NA
					NA		NA		NA		NA		NA		NA		NA		NA		NA		NA		NA		NA		NA		NA		NA		NA		NA		NA		NA		NA		NA		NA		NA
					NA		NA		NA		NA		NA		NA		NA		NA		NA		NA		NA		NA		NA		NA		NA		NA		NA		NA		NA		NA		NA		NA		NA
					NA		NA		NA		NA		NA		NA		NA		NA		NA		NA		NA		NA		NA		NA		NA		NA		NA		NA		NA		NA		NA		NA		NA
					NA		NA		NA		NA		NA		NA		NA		NA		NA		NA		NA		NA		NA		NA		NA		NA		NA		NA		NA		NA		NA		NA		NA
					NA		NA		NA		NA		NA		NA		NA		NA		NA		NA		NA		NA		NA		NA		NA		NA		NA		NA		NA		NA		NA		NA		NA
					NA		NA		NA		NA		NA		NA		NA		NA		NA		NA		NA		NA		NA		NA		NA		NA		NA		NA		NA		NA		NA		NA		NA
					NA		NA		NA		NA		NA		NA		NA		NA		NA		NA		NA		NA		NA		NA		NA		NA		NA		NA		NA		NA		NA		NA		NA
					NA		NA		NA		NA		NA		NA		NA		NA		NA		NA		NA		NA		NA		NA		NA		NA		NA		NA		NA		NA		NA		NA		NA
					NA		NA		NA		NA		NA		NA		NA		NA		NA		NA		NA		NA		NA		NA		NA		NA		NA		NA		NA		NA		NA		NA		NA
					NA		NA		NA		NA		NA		NA		NA		NA		NA		NA		NA		NA		NA		NA		NA		NA		NA		NA		NA		NA		NA		NA		NA
					NA		NA		NA		NA		NA		NA		NA		NA		NA		NA		NA		NA		NA		NA		NA		NA		NA		NA		NA		NA		NA		NA		NA
					NA		NA		NA		NA		NA		NA		NA		NA		NA		NA		NA		NA		NA		NA		NA		NA		NA		NA		NA		NA		NA		NA		NA
					NA		NA		NA		NA		NA		NA		NA		NA		NA		NA		NA		NA		NA		NA		NA		NA		NA		NA		NA		NA		NA		NA		NA
					NA		NA		NA		NA		NA		NA		NA		NA		NA		NA		NA		NA		NA		NA		NA		NA		NA		NA		NA		NA		NA		NA		NA
					NA		NA		NA		NA		NA		NA		NA		NA		NA		NA		NA		NA		NA		NA		NA		NA		NA		NA		NA		NA		NA		NA		NA
					NA		NA		NA		NA		NA		NA		NA		NA		NA		NA		NA		NA		NA		NA		NA		NA		NA		NA		NA		NA		NA		NA		NA
					NA		NA		NA		NA		NA		NA		NA		NA		NA		NA		NA		NA		NA		NA		NA		NA		NA		NA		NA		NA		NA		NA		NA
					NA		NA		NA		NA		NA		NA		NA		NA		NA		NA		NA		NA		NA		NA		NA		NA		NA		NA		NA		NA		NA		NA		NA
					NA		NA		NA		NA		NA		NA		NA		NA		NA		NA		NA		NA		NA		NA		NA		NA		NA		NA		NA		NA		NA		NA		NA
					NA		NA		NA		NA		NA		NA		NA		NA		NA		NA		NA		NA		NA		NA		NA		NA		NA		NA		NA		NA		NA		NA		NA
					NA		NA		NA		NA		NA		NA		NA		NA		NA		NA		NA		NA		NA		NA		NA		NA		NA		NA		NA		NA		NA		NA		NA
					NA		NA		NA		NA		NA		NA		NA		NA		NA		NA		NA		NA		NA		NA		NA		NA		NA		NA		NA		NA		NA		NA		NA
					NA		NA		NA		NA		NA		NA		NA		NA		NA		NA		NA		NA		NA		NA		NA		NA		NA		NA		NA		NA		NA		NA		NA
					NA		NA		NA		NA		NA		NA		NA		NA		NA		NA		NA		NA		NA		NA		NA		NA		NA		NA		NA		NA		NA		NA		NA
					NA		NA		NA		NA		NA		NA		NA		NA		NA		NA		NA		NA		NA		NA		NA		NA		NA		NA		NA		NA		NA		NA		NA
					NA		NA		NA		NA		NA		NA		NA		NA		NA		NA		NA		NA		NA		NA		NA		NA		NA		NA		NA		NA		NA		NA		NA
					NA		NA		NA		NA		NA		NA		NA		NA		NA		NA		NA		NA		NA		NA		NA		NA		NA		NA		NA		NA		NA		NA		NA
					NA		NA		NA		NA		NA		NA		NA		NA		NA		NA		NA		NA		NA		NA		NA		NA		NA		NA		NA		NA		NA		NA		NA
					NA		NA		NA		NA		NA		NA		NA		NA		NA		NA		NA		NA		NA		NA		NA		NA		NA		NA		NA		NA		NA		NA		NA
					NA		NA		NA		NA		NA		NA		NA		NA		NA		NA		NA		NA		NA		NA		NA		NA		NA		NA		NA		NA		NA		NA		NA
					NA		NA		NA		NA		NA		NA		NA		NA		NA		NA		NA		NA		NA		NA		NA		NA		NA		NA		NA		NA		NA		NA		NA
					NA		NA		NA		NA		NA		NA		NA		NA		NA		NA		NA		NA		NA		NA		NA		NA		NA		NA		NA		NA		NA		NA		NA
					NA		NA		NA		NA		NA		NA		NA		NA		NA		NA		NA		NA		NA		NA		NA		NA		NA		NA		NA		NA		NA		NA		NA
					NA		NA		NA		NA		NA		NA		NA		NA		NA		NA		NA		NA		NA		NA		NA		NA		NA		NA		NA		NA		NA		NA		NA
					NA		NA		NA		NA		NA		NA		NA		NA		NA		NA		NA		NA		NA		NA		NA		NA		NA		NA		NA		NA		NA		NA		NA
					NA		NA		NA		NA		NA		NA		NA		NA		NA		NA		NA		NA		NA		NA		NA		NA		NA		NA		NA		NA		NA		NA		NA
					NA		NA		NA		NA		NA		NA		NA		NA		NA		NA		NA		NA		NA		NA		NA		NA		NA		NA		NA		NA		NA		NA		NA
					NA		NA		NA		NA		NA		NA		NA		NA		NA		NA		NA		NA		NA		NA		NA		NA		NA		NA		NA		NA		NA		NA		NA
					NA		NA		NA		NA		NA		NA		NA		NA		NA		NA		NA		NA		NA		NA		NA		NA		NA		NA		NA		NA		NA		NA		NA
					NA		NA		NA		NA		NA		NA		NA		NA		NA		NA		NA		NA		NA		NA		NA		NA		NA		NA		NA		NA		NA		NA		NA
					NA		NA		NA		NA		NA		NA		NA		NA		NA		NA		NA		NA		NA		NA		NA		NA		NA		NA		NA		NA		NA		NA		NA
					NA		NA		NA		NA		NA		NA		NA		NA		NA		NA		NA		NA		NA		NA		NA		NA		NA		NA		NA		NA		NA		NA		NA
					NA		NA		NA		NA		NA		NA		NA		NA		NA		NA		NA		NA		NA		NA		NA		NA		NA		NA		NA		NA		NA		NA		NA
					NA		NA		NA		NA		NA		NA		NA		NA		NA		NA		NA		NA		NA		NA		NA		NA		NA		NA		NA		NA		NA		NA		NA
					NA		NA		NA		NA		NA		NA		NA		NA		NA		NA		NA		NA		NA		NA		NA		NA		NA		NA		NA		NA		NA		NA		NA
					NA		NA		NA		NA		NA		NA		NA		NA		NA		NA		NA		NA		NA		NA		NA		NA		NA		NA		NA		NA		NA		NA		NA
					NA		NA		NA		NA		NA		NA		NA		NA		NA		NA		NA		NA		NA		NA		NA		NA		NA		NA		NA		NA		NA		NA		NA
					NA		NA		NA		NA		NA		NA		NA		NA		NA		NA		NA		NA		NA		NA		NA		NA		NA		NA		NA		NA		NA		NA		NA
					NA		NA		NA		NA		NA		NA		NA		NA		NA		NA		NA		NA		NA		NA		NA		NA		NA		NA		NA		NA		NA		NA		NA
					NA		NA		NA		NA		NA		NA		NA		NA		NA		NA		NA		NA		NA		NA		NA		NA		NA		NA		NA		NA		NA		NA		NA
					NA		NA		NA		NA		NA		NA		NA		NA		NA		NA		NA		NA		NA		NA		NA		NA		NA		NA		NA		NA		NA		NA		NA
					NA		NA		NA		NA		NA		NA		NA		NA		NA		NA		NA		NA		NA		NA		NA		NA		NA		NA		NA		NA		NA		NA		NA
					NA		NA		NA		NA		NA		NA		NA		NA		NA		NA		NA		NA		NA		NA		NA		NA		NA		NA		NA		NA		NA		NA		NA
					NA		NA		NA		NA		NA		NA		NA		NA		NA		NA		NA		NA		NA		NA		NA		NA		NA		NA		NA		NA		NA		NA		NA
					NA		NA		NA		NA		NA		NA		NA		NA		NA		NA		NA		NA		NA		NA		NA		NA		NA		NA		NA		NA		NA		NA		NA
					NA		NA		NA		NA		NA		NA		NA		NA		NA		NA		NA		NA		NA		NA		NA		NA		NA		NA		NA		NA		NA		NA		NA
					NA		NA		NA		NA		NA		NA		NA		NA		NA		NA		NA		NA		NA		NA		NA		NA		NA		NA		NA		NA		NA		NA		NA
					NA		NA		NA		NA		NA		NA		NA		NA		NA		NA		NA		NA		NA		NA		NA		NA		NA		NA		NA		NA		NA		NA		NA
					NA		NA		NA		NA		NA		NA		NA		NA		NA		NA		NA		NA		NA		NA		NA		NA		NA		NA		NA		NA		NA		NA		NA
					NA		NA		NA		NA		NA		NA		NA		NA		NA		NA		NA		NA		NA		NA		NA		NA		NA		NA		NA		NA		NA		NA		NA
					NA		NA		NA		NA		NA		NA		NA		NA		NA		NA		NA		NA		NA		NA		NA		NA		NA		NA		NA		NA		NA		NA		NA
					NA		NA		NA		NA		NA		NA		NA		NA		NA		NA		NA		NA		NA		NA		NA		NA		NA		NA		NA		NA		NA		NA		NA
					NA		NA		NA		NA		NA		NA		NA		NA		NA		NA		NA		NA		NA		NA		NA		NA		NA		NA		NA		NA		NA		NA		NA
					NA		NA		NA		NA		NA		NA		NA		NA		NA		NA		NA		NA		NA		NA		NA		NA		NA		NA		NA		NA		NA		NA		NA
					NA		NA		NA		NA		NA		NA		NA		NA		NA		NA		NA		NA		NA		NA		NA		NA		NA		NA		NA		NA		NA		NA		NA
					NA		NA		NA		NA		NA		NA		NA		NA		NA		NA		NA		NA		NA		NA		NA		NA		NA		NA		NA		NA		NA		NA		NA
					NA		NA		NA		NA		NA		NA		NA		NA		NA		NA		NA		NA		NA		NA		NA		NA		NA		NA		NA		NA		NA		NA		NA
					NA		NA		NA		NA		NA		NA		NA		NA		NA		NA		NA		NA		NA		NA		NA		NA		NA		NA		NA		NA		NA		NA		NA
					NA		NA		NA		NA		NA		NA		NA		NA		NA		NA		NA		NA		NA		NA		NA		NA		NA		NA		NA		NA		NA		NA		NA
					NA		NA		NA		NA		NA		NA		NA		NA		NA		NA		NA		NA		NA		NA		NA		NA		NA		NA		NA		NA		NA		NA		NA
					NA		NA		NA		NA		NA		NA		NA		NA		NA		NA		NA		NA		NA		NA		NA		NA		NA		NA		NA		NA		NA		NA		NA
					NA		NA		NA		NA		NA		NA		NA		NA		NA		NA		NA		NA		NA		NA		NA		NA		NA		NA		NA		NA		NA		NA		NA
					NA		NA		NA		NA		NA		NA		NA		NA		NA		NA		NA		NA		NA		NA		NA		NA		NA		NA		NA		NA		NA		NA		NA
					NA		NA		NA		NA		NA		NA		NA		NA		NA		NA		NA		NA		NA		NA		NA		NA		NA		NA		NA		NA		NA		NA		NA
					NA		NA		NA		NA		NA		NA		NA		NA		NA		NA		NA		NA		NA		NA		NA		NA		NA		NA		NA		NA		NA		NA		NA
					NA		NA		NA		NA		NA		NA		NA		NA		NA		NA		NA		NA		NA		NA		NA		NA		NA		NA		NA		NA		NA		NA		NA
					NA		NA		NA		NA		NA		NA		NA		NA		NA		NA		NA		NA		NA		NA		NA		NA		NA		NA		NA		NA		NA		NA		NA
					NA		NA		NA		NA		NA		NA		NA		NA		NA		NA		NA		NA		NA		NA		NA		NA		NA		NA		NA		NA		NA		NA		NA
					NA		NA		NA		NA		NA		NA		NA		NA		NA		NA		NA		NA		NA		NA		NA		NA		NA		NA		NA		NA		NA		NA		NA
					NA		NA		NA		NA		NA		NA		NA		NA		NA		NA		NA		NA		NA		NA		NA		NA		NA		NA		NA		NA		NA		NA		NA
					NA		NA		NA		NA		NA		NA		NA		NA		NA		NA		NA		NA		NA		NA		NA		NA		NA		NA		NA		NA		NA		NA		NA
					NA		NA		NA		NA		NA		NA		NA		NA		NA		NA		NA		NA		NA		NA		NA		NA		NA		NA		NA		NA		NA		NA		NA
					NA		NA		NA		NA		NA		NA		NA		NA		NA		NA		NA		NA		NA		NA		NA		NA		NA		NA		NA		NA		NA		NA		NA
					NA		NA		NA		NA		NA		NA		NA		NA		NA		NA		NA		NA		NA		NA		NA		NA		NA		NA		NA		NA		NA		NA		NA
					NA		NA		NA		NA		NA		NA		NA		NA		NA		NA		NA		NA		NA		NA		NA		NA		NA		NA		NA		NA		NA		NA		NA
					NA		NA		NA		NA		NA		NA		NA		NA		NA		NA		NA		NA		NA		NA		NA		NA		NA		NA		NA		NA		NA		NA		NA
					NA		NA		NA		NA		NA		NA		NA		NA		NA		NA		NA		NA		NA		NA		NA		NA		NA		NA		NA		NA		NA		NA		NA
					NA		NA		NA		NA		NA		NA		NA		NA		NA		NA		NA		NA		NA		NA		NA		NA		NA		NA		NA		NA		NA		NA		NA
					NA		NA		NA		NA		NA		NA		NA		NA		NA		NA		NA		NA		NA		NA		NA		NA		NA		NA		NA		NA		NA		NA		NA
					NA		NA		NA		NA		NA		NA		NA		NA		NA		NA		NA		NA		NA		NA		NA		NA		NA		NA		NA		NA		NA		NA		NA
					NA		NA		NA		NA		NA		NA		NA		NA		NA		NA		NA		NA		NA		NA		NA		NA		NA		NA		NA		NA		NA		NA		NA
					NA		NA		NA		NA		NA		NA		NA		NA		NA		NA		NA		NA		NA		NA		NA		NA		NA		NA		NA		NA		NA		NA		NA
					NA		NA		NA		NA		NA		NA		NA		NA		NA		NA		NA		NA		NA		NA		NA		NA		NA		NA		NA		NA		NA		NA		NA
					NA		NA		NA		NA		NA		NA		NA		NA		NA		NA		NA		NA		NA		NA		NA		NA		NA		NA		NA		NA		NA		NA		NA
					NA		NA		NA		NA		NA		NA		NA		NA		NA		NA		NA		NA		NA		NA		NA		NA		NA		NA		NA		NA		NA		NA		NA
					NA		NA		NA		NA		NA		NA		NA		NA		NA		NA		NA		NA		NA		NA		NA		NA		NA		NA		NA		NA		NA		NA		NA
					NA		NA		NA		NA		NA		NA		NA		NA		NA		NA		NA		NA		NA		NA		NA		NA		NA		NA		NA		NA		NA		NA		NA
					NA		NA		NA		NA		NA		NA		NA		NA		NA		NA		NA		NA		NA		NA		NA		NA		NA		NA		NA		NA		NA		NA		NA
					NA		NA		NA		NA		NA		NA		NA		NA		NA		NA		NA		NA		NA		NA		NA		NA		NA		NA		NA		NA		NA		NA		NA
					NA		NA		NA		NA		NA		NA		NA		NA		NA		NA		NA		NA		NA		NA		NA		NA		NA		NA		NA		NA		NA		NA		NA
					NA		NA		NA		NA		NA		NA		NA		NA		NA		NA		NA		NA		NA		NA		NA		NA		NA		NA		NA		NA		NA		NA		NA
					NA		NA		NA		NA		NA		NA		NA		NA		NA		NA		NA		NA		NA		NA		NA		NA		NA		NA		NA		NA		NA		NA		NA
					NA		NA		NA		NA		NA		NA		NA		NA		NA		NA		NA		NA		NA		NA		NA		NA		NA		NA		NA		NA		NA		NA		NA
					NA		NA		NA		NA		NA		NA		NA		NA		NA		NA		NA		NA		NA		NA		NA		NA		NA		NA		NA		NA		NA		NA		NA
					NA		NA		NA		NA		NA		NA		NA		NA		NA		NA		NA		NA		NA		NA		NA		NA		NA		NA		NA		NA		NA		NA		NA
					NA		NA		NA		NA		NA		NA		NA		NA		NA		NA		NA		NA		NA		NA		NA		NA		NA		NA		NA		NA		NA		NA		NA
					NA		NA		NA		NA		NA		NA		NA		NA		NA		NA		NA		NA		NA		NA		NA		NA		NA		NA		NA		NA		NA		NA		NA
					NA		NA		NA		NA		NA		NA		NA		NA		NA		NA		NA		NA		NA		NA		NA		NA		NA		NA		NA		NA		NA		NA		NA
					NA		NA		NA		NA		NA		NA		NA		NA		NA		NA		NA		NA		NA		NA		NA		NA		NA		NA		NA		NA		NA		NA		NA
					NA		NA		NA		NA		NA		NA		NA		NA		NA		NA		NA		NA		NA		NA		NA		NA		NA		NA		NA		NA		NA		NA		NA
					NA		NA		NA		NA		NA		NA		NA		NA		NA		NA		NA		NA		NA		NA		NA		NA		NA		NA		NA		NA		NA		NA		NA
					NA		NA		NA		NA		NA		NA		NA		NA		NA		NA		NA		NA		NA		NA		NA		NA		NA		NA		NA		NA		NA		NA		NA
					NA		NA		NA		NA		NA		NA		NA		NA		NA		NA		NA		NA		NA		NA		NA		NA		NA		NA		NA		NA		NA		NA		NA
					NA		NA		NA		NA		NA		NA		NA		NA		NA		NA		NA		NA		NA		NA		NA		NA		NA		NA		NA		NA		NA		NA		NA
					NA		NA		NA		NA		NA		NA		NA		NA		NA		NA		NA		NA		NA		NA		NA		NA		NA		NA		NA		NA		NA		NA		NA
					NA		NA		NA		NA		NA		NA		NA		NA		NA		NA		NA		NA		NA		NA		NA		NA		NA		NA		NA		NA		NA		NA		NA
					NA		NA		NA		NA		NA		NA		NA		NA		NA		NA		NA		NA		NA		NA		NA		NA		NA		NA		NA		NA		NA		NA		NA
					NA		NA		NA		NA		NA		NA		NA		NA		NA		NA		NA		NA		NA		NA		NA		NA		NA		NA		NA		NA		NA		NA		NA
					NA		NA		NA		NA		NA		NA		NA		NA		NA		NA		NA		NA		NA		NA		NA		NA		NA		NA		NA		NA		NA		NA		NA
					NA		NA		NA		NA		NA		NA		NA		NA		NA		NA		NA		NA		NA		NA		NA		NA		NA		NA		NA		NA		NA		NA		NA
					NA		NA		NA		NA		NA		NA		NA		NA		NA		NA		NA		NA		NA		NA		NA		NA		NA		NA		NA		NA		NA		NA		NA
					NA		NA		NA		NA		NA		NA		NA		NA		NA		NA		NA		NA		NA		NA		NA		NA		NA		NA		NA		NA		NA		NA		NA
					NA		NA		NA		NA		NA		NA		NA		NA		NA		NA		NA		NA		NA		NA		NA		NA		NA		NA		NA		NA		NA		NA		NA
					NA		NA		NA		NA		NA		NA		NA		NA		NA		NA		NA		NA		NA		NA		NA		NA		NA		NA		NA		NA		NA		NA		NA
					NA		NA		NA		NA		NA		NA		NA		NA		NA		NA		NA		NA		NA		NA		NA		NA		NA		NA		NA		NA		NA		NA		NA
					NA		NA		NA		NA		NA		NA		NA		NA		NA		NA		NA		NA		NA		NA		NA		NA		NA		NA		NA		NA		NA		NA		NA
					NA		NA		NA		NA		NA		NA		NA		NA		NA		NA		NA		NA		NA		NA		NA		NA		NA		NA		NA		NA		NA		NA		NA
					NA		NA		NA		NA		NA		NA		NA		NA		NA		NA		NA		NA		NA		NA		NA		NA		NA		NA		NA		NA		NA		NA		NA
					NA		NA		NA		NA		NA		NA		NA		NA		NA		NA		NA		NA		NA		NA		NA		NA		NA		NA		NA		NA		NA		NA		NA
					NA		NA		NA		NA		NA		NA		NA		NA		NA		NA		NA		NA		NA		NA		NA		NA		NA		NA		NA		NA		NA		NA		NA
					NA		NA		NA		NA		NA		NA		NA		NA		NA		NA		NA		NA		NA		NA		NA		NA		NA		NA		NA		NA		NA		NA		NA
					NA		NA		NA		NA		NA		NA		NA		NA		NA		NA		NA		NA		NA		NA		NA		NA		NA		NA		NA		NA		NA		NA		NA
					NA		NA		NA		NA		NA		NA		NA		NA		NA		NA		NA		NA		NA		NA		NA		NA		NA		NA		NA		NA		NA		NA		NA
					NA		NA		NA		NA		NA		NA		NA		NA		NA		NA		NA		NA		NA		NA		NA		NA		NA		NA		NA		NA		NA		NA		NA
					NA		NA		NA		NA		NA		NA		NA		NA		NA		NA		NA		NA		NA		NA		NA		NA		NA		NA		NA		NA		NA		NA		NA
					NA		NA		NA		NA		NA		NA		NA		NA		NA		NA		NA		NA		NA		NA		NA		NA		NA		NA		NA		NA		NA		NA		NA
					NA		NA		NA		NA		NA		NA		NA		NA		NA		NA		NA		NA		NA		NA		NA		NA		NA		NA		NA		NA		NA		NA		NA
					NA		NA		NA		NA		NA		NA		NA		NA		NA		NA		NA		NA		NA		NA		NA		NA		NA		NA		NA		NA		NA		NA		NA
					NA		NA		NA		NA		NA		NA		NA		NA		NA		NA		NA		NA		NA		NA		NA		NA		NA		NA		NA		NA		NA		NA		NA
					NA		NA		NA		NA		NA		NA		NA		NA		NA		NA		NA		NA		NA		NA		NA		NA		NA		NA		NA		NA		NA		NA		NA
					NA		NA		NA		NA		NA		NA		NA		NA		NA		NA		NA		NA		NA		NA		NA		NA		NA		NA		NA		NA		NA		NA		NA
					NA		NA		NA		NA		NA		NA		NA		NA		NA		NA		NA		NA		NA		NA		NA		NA		NA		NA		NA		NA		NA		NA		NA
					NA		NA		NA		NA		NA		NA		NA		NA		NA		NA		NA		NA		NA		NA		NA		NA		NA		NA		NA		NA		NA		NA		NA
					NA		NA		NA		NA		NA		NA		NA		NA		NA		NA		NA		NA		NA		NA		NA		NA		NA		NA		NA		NA		NA		NA		NA
					NA		NA		NA		NA		NA		NA		NA		NA		NA		NA		NA		NA		NA		NA		NA		NA		NA		NA		NA		NA		NA		NA		NA
					NA		NA		NA		NA		NA		NA		NA		NA		NA		NA		NA		NA		NA		NA		NA		NA		NA		NA		NA		NA		NA		NA		NA
					NA		NA		NA		NA		NA		NA		NA		NA		NA		NA		NA		NA		NA		NA		NA		NA		NA		NA		NA		NA		NA		NA		NA
					NA		NA		NA		NA		NA		NA		NA		NA		NA		NA		NA		NA		NA		NA		NA		NA		NA		NA		NA		NA		NA		NA		NA
					NA		NA		NA		NA		NA		NA		NA		NA		NA		NA		NA		NA		NA		NA		NA		NA		NA		NA		NA		NA		NA		NA		NA
					NA		NA		NA		NA		NA		NA		NA		NA		NA		NA		NA		NA		NA		NA		NA		NA		NA		NA		NA		NA		NA		NA		NA
					NA		NA		NA		NA		NA		NA		NA		NA		NA		NA		NA		NA		NA		NA		NA		NA		NA		NA		NA		NA		NA		NA		NA
					NA		NA		NA		NA		NA		NA		NA		NA		NA		NA		NA		NA		NA		NA		NA		NA		NA		NA		NA		NA		NA		NA		NA
					NA		NA		NA		NA		NA		NA		NA		NA		NA		NA		NA		NA		NA		NA		NA		NA		NA		NA		NA		NA		NA		NA		NA
					NA		NA		NA		NA		NA		NA		NA		NA		NA		NA		NA		NA		NA		NA		NA		NA		NA		NA		NA		NA		NA		NA		NA
					NA		NA		NA		NA		NA		NA		NA		NA		NA		NA		NA		NA		NA		NA		NA		NA		NA		NA		NA		NA		NA		NA		NA
					NA		NA		NA		NA		NA		NA		NA		NA		NA		NA		NA		NA		NA		NA		NA		NA		NA		NA		NA		NA		NA		NA		NA
					NA		NA		NA		NA		NA		NA		NA		NA		NA		NA		NA		NA		NA		NA		NA		NA		NA		NA		NA		NA		NA		NA		NA
					NA		NA		NA		NA		NA		NA		NA		NA		NA		NA		NA		NA		NA		NA		NA		NA		NA		NA		NA		NA		NA		NA		NA
					NA		NA		NA		NA		NA		NA		NA		NA		NA		NA		NA		NA		NA		NA		NA		NA		NA		NA		NA		NA		NA		NA		NA
					NA		NA		NA		NA		NA		NA		NA		NA		NA		NA		NA		NA		NA		NA		NA		NA		NA		NA		NA		NA		NA		NA		NA
					NA		NA		NA		NA		NA		NA		NA		NA		NA		NA		NA		NA		NA		NA		NA		NA		NA		NA		NA		NA		NA		NA		NA
					NA		NA		NA		NA		NA		NA		NA		NA		NA		NA		NA		NA		NA		NA		NA		NA		NA		NA		NA		NA		NA		NA		NA
					NA		NA		NA		NA		NA		NA		NA		NA		NA		NA		NA		NA		NA		NA		NA		NA		NA		NA		NA		NA		NA		NA		NA
					NA		NA		NA		NA		NA		NA		NA		NA		NA		NA		NA		NA		NA		NA		NA		NA		NA		NA		NA		NA		NA		NA		NA
					NA		NA		NA		NA		NA		NA		NA		NA		NA		NA		NA		NA		NA		NA		NA		NA		NA		NA		NA		NA		NA		NA		NA
					NA		NA		NA		NA		NA		NA		NA		NA		NA		NA		NA		NA		NA		NA		NA		NA		NA		NA		NA		NA		NA		NA		NA
					NA		NA		NA		NA		NA		NA		NA		NA		NA		NA		NA		NA		NA		NA		NA		NA		NA		NA		NA		NA		NA		NA		NA
					NA		NA		NA		NA		NA		NA		NA		NA		NA		NA		NA		NA		NA		NA		NA		NA		NA		NA		NA		NA		NA		NA		NA
					NA		NA		NA		NA		NA		NA		NA		NA		NA		NA		NA		NA		NA		NA		NA		NA		NA		NA		NA		NA		NA		NA		NA
					NA		NA		NA		NA		NA		NA		NA		NA		NA		NA		NA		NA		NA		NA		NA		NA		NA		NA		NA		NA		NA		NA		NA
					NA		NA		NA		NA		NA		NA		NA		NA		NA		NA		NA		NA		NA		NA		NA		NA		NA		NA		NA		NA		NA		NA		NA
					NA		NA		NA		NA		NA		NA		NA		NA		NA		NA		NA		NA		NA		NA		NA		NA		NA		NA		NA		NA		NA		NA		NA
					NA		NA		NA		NA		NA		NA		NA		NA		NA		NA		NA		NA		NA		NA		NA		NA		NA		NA		NA		NA		NA		NA		NA
					NA		NA		NA		NA		NA		NA		NA		NA		NA		NA		NA		NA		NA		NA		NA		NA		NA		NA		NA		NA		NA		NA		NA
					NA		NA		NA		NA		NA		NA		NA		NA		NA		NA		NA		NA		NA		NA		NA		NA		NA		NA		NA		NA		NA		NA		NA
					NA		NA		NA		NA		NA		NA		NA		NA		NA		NA		NA		NA		NA		NA		NA		NA		NA		NA		NA		NA		NA		NA		NA
					NA		NA		NA		NA		NA		NA		NA		NA		NA		NA		NA		NA		NA		NA		NA		NA		NA		NA		NA		NA		NA		NA		NA
					NA		NA		NA		NA		NA		NA		NA		NA		NA		NA		NA		NA		NA		NA		NA		NA		NA		NA		NA		NA		NA		NA		NA
					NA		NA		NA		NA		NA		NA		NA		NA		NA		NA		NA		NA		NA		NA		NA		NA		NA		NA		NA		NA		NA		NA		NA
					NA		NA		NA		NA		NA		NA		NA		NA		NA		NA		NA		NA		NA		NA		NA		NA		NA		NA		NA		NA		NA		NA		NA
					NA		NA		NA		NA		NA		NA		NA		NA		NA		NA		NA		NA		NA		NA		NA		NA		NA		NA		NA		NA		NA		NA		NA
					NA		NA		NA		NA		NA		NA		NA		NA		NA		NA		NA		NA		NA		NA		NA		NA		NA		NA		NA		NA		NA		NA		NA
					NA		NA		NA		NA		NA		NA		NA		NA		NA		NA		NA		NA		NA		NA		NA		NA		NA		NA		NA		NA		NA		NA		NA
					NA		NA		NA		NA		NA		NA		NA		NA		NA		NA		NA		NA		NA		NA		NA		NA		NA		NA		NA		NA		NA		NA		NA
					NA		NA		NA		NA		NA		NA		NA		NA		NA		NA		NA		NA		NA		NA		NA		NA		NA		NA		NA		NA		NA		NA		NA
					NA		NA		NA		NA		NA		NA		NA		NA		NA		NA		NA		NA		NA		NA		NA		NA		NA		NA		NA		NA		NA		NA		NA
					NA		NA		NA		NA		NA		NA		NA		NA		NA		NA		NA		NA		NA		NA		NA		NA		NA		NA		NA		NA		NA		NA		NA
					NA		NA		NA		NA		NA		NA		NA		NA		NA		NA		NA		NA		NA		NA		NA		NA		NA		NA		NA		NA		NA		NA		NA
					NA		NA		NA		NA		NA		NA		NA		NA		NA		NA		NA		NA		NA		NA		NA		NA		NA		NA		NA		NA		NA		NA		NA
					NA		NA		NA		NA		NA		NA		NA		NA		NA		NA		NA		NA		NA		NA		NA		NA		NA		NA		NA		NA		NA		NA		NA
					NA		NA		NA		NA		NA		NA		NA		NA		NA		NA		NA		NA		NA		NA		NA		NA		NA		NA		NA		NA		NA		NA		NA
					NA		NA		NA		NA		NA		NA		NA		NA		NA		NA		NA		NA		NA		NA		NA		NA		NA		NA		NA		NA		NA		NA		NA
					NA		NA		NA		NA		NA		NA		NA		NA		NA		NA		NA		NA		NA		NA		NA		NA		NA		NA		NA		NA		NA		NA		NA
					NA		NA		NA		NA		NA		NA		NA		NA		NA		NA		NA		NA		NA		NA		NA		NA		NA		NA		NA		NA		NA		NA		NA
					NA		NA		NA		NA		NA		NA		NA		NA		NA		NA		NA		NA		NA		NA		NA		NA		NA		NA		NA		NA		NA		NA		NA
					NA		NA		NA		NA		NA		NA		NA		NA		NA		NA		NA		NA		NA		NA		NA		NA		NA		NA		NA		NA		NA		NA		NA
					NA		NA		NA		NA		NA		NA		NA		NA		NA		NA		NA		NA		NA		NA		NA		NA		NA		NA		NA		NA		NA		NA		NA
					NA		NA		NA		NA		NA		NA		NA		NA		NA		NA		NA		NA		NA		NA		NA		NA		NA		NA		NA		NA		NA		NA		NA
					NA		NA		NA		NA		NA		NA		NA		NA		NA		NA		NA		NA		NA		NA		NA		NA		NA		NA		NA		NA		NA		NA		NA
					NA		NA		NA		NA		NA		NA		NA		NA		NA		NA		NA		NA		NA		NA		NA		NA		NA		NA		NA		NA		NA		NA		NA
					NA		NA		NA		NA		NA		NA		NA		NA		NA		NA		NA		NA		NA		NA		NA		NA		NA		NA		NA		NA		NA		NA		NA
					NA		NA		NA		NA		NA		NA		NA		NA		NA		NA		NA		NA		NA		NA		NA		NA		NA		NA		NA		NA		NA		NA		NA
					NA		NA		NA		NA		NA		NA		NA		NA		NA		NA		NA		NA		NA		NA		NA		NA		NA		NA		NA		NA		NA		NA		NA
					NA		NA		NA		NA		NA		NA		NA		NA		NA		NA		NA		NA		NA		NA		NA		NA		NA		NA		NA		NA		NA		NA		NA
					NA		NA		NA		NA		NA		NA		NA		NA		NA		NA		NA		NA		NA		NA		NA		NA		NA		NA		NA		NA		NA		NA		NA
					NA		NA		NA		NA		NA		NA		NA		NA		NA		NA		NA		NA		NA		NA		NA		NA		NA		NA		NA		NA		NA		NA		NA
					NA		NA		NA		NA		NA		NA		NA		NA		NA		NA		NA		NA		NA		NA		NA		NA		NA		NA		NA		NA		NA		NA		NA
					NA		NA		NA		NA		NA		NA		NA		NA		NA		NA		NA		NA		NA		NA		NA		NA		NA		NA		NA		NA		NA		NA		NA
					NA		NA		NA		NA		NA		NA		NA		NA		NA		NA		NA		NA		NA		NA		NA		NA		NA		NA		NA		NA		NA		NA		NA
					NA		NA		NA		NA		NA		NA		NA		NA		NA		NA		NA		NA		NA		NA		NA		NA		NA		NA		NA		NA		NA		NA		NA
					NA		NA		NA		NA		NA		NA		NA		NA		NA		NA		NA		NA		NA		NA		NA		NA		NA		NA		NA		NA		NA		NA		NA
					NA		NA		NA		NA		NA		NA		NA		NA		NA		NA		NA		NA		NA		NA		NA		NA		NA		NA		NA		NA		NA		NA		NA
					NA		NA		NA		NA		NA		NA		NA		NA		NA		NA		NA		NA		NA		NA		NA		NA		NA		NA		NA		NA		NA		NA		NA
					NA		NA		NA		NA		NA		NA		NA		NA		NA		NA		NA		NA		NA		NA		NA		NA		NA		NA		NA		NA		NA		NA		NA
					NA		NA		NA		NA		NA		NA		NA		NA		NA		NA		NA		NA		NA		NA		NA		NA		NA		NA		NA		NA		NA		NA		NA
					NA		NA		NA		NA		NA		NA		NA		NA		NA		NA		NA		NA		NA		NA		NA		NA		NA		NA		NA		NA		NA		NA		NA
					NA		NA		NA		NA		NA		NA		NA		NA		NA		NA		NA		NA		NA		NA		NA		NA		NA		NA		NA		NA		NA		NA		NA
					NA		NA		NA		NA		NA		NA		NA		NA		NA		NA		NA		NA		NA		NA		NA		NA		NA		NA		NA		NA		NA		NA		NA
					NA		NA		NA		NA		NA		NA		NA		NA		NA		NA		NA		NA		NA		NA		NA		NA		NA		NA		NA		NA		NA		NA		NA
					NA		NA		NA		NA		NA		NA		NA		NA		NA		NA		NA		NA		NA		NA		NA		NA		NA		NA		NA		NA		NA		NA		NA
					NA		NA		NA		NA		NA		NA		NA		NA		NA		NA		NA		NA		NA		NA		NA		NA		NA		NA		NA		NA		NA		NA		NA
					NA		NA		NA		NA		NA		NA		NA		NA		NA		NA		NA		NA		NA		NA		NA		NA		NA		NA		NA		NA		NA		NA		NA
					NA		NA		NA		NA		NA		NA		NA		NA		NA		NA		NA		NA		NA		NA		NA		NA		NA		NA		NA		NA		NA		NA		NA
					NA		NA		NA		NA		NA		NA		NA		NA		NA		NA		NA		NA		NA		NA		NA		NA		NA		NA		NA		NA		NA		NA		NA
					NA		NA		NA		NA		NA		NA		NA		NA		NA		NA		NA		NA		NA		NA		NA		NA		NA		NA		NA		NA		NA		NA		NA
					NA		NA		NA		NA		NA		NA		NA		NA		NA		NA		NA		NA		NA		NA		NA		NA		NA		NA		NA		NA		NA		NA		NA
					NA		NA		NA		NA		NA		NA		NA		NA		NA		NA		NA		NA		NA		NA		NA		NA		NA		NA		NA		NA		NA		NA		NA
					NA		NA		NA		NA		NA		NA		NA		NA		NA		NA		NA		NA		NA		NA		NA		NA		NA		NA		NA		NA		NA		NA		NA
					NA		NA		NA		NA		NA		NA		NA		NA		NA		NA		NA		NA		NA		NA		NA		NA		NA		NA		NA		NA		NA		NA		NA
					NA		NA		NA		NA		NA		NA		NA		NA		NA		NA		NA		NA		NA		NA		NA		NA		NA		NA		NA		NA		NA		NA		NA
					NA		NA		NA		NA		NA		NA		NA		NA		NA		NA		NA		NA		NA		NA		NA		NA		NA		NA		NA		NA		NA		NA		NA
					NA		NA		NA		NA		NA		NA		NA		NA		NA		NA		NA		NA		NA		NA		NA		NA		NA		NA		NA		NA		NA		NA		NA
					NA		NA		NA		NA		NA		NA		NA		NA		NA		NA		NA		NA		NA		NA		NA		NA		NA		NA		NA		NA		NA		NA		NA
					NA		NA		NA		NA		NA		NA		NA		NA		NA		NA		NA		NA		NA		NA		NA		NA		NA		NA		NA		NA		NA		NA		NA
					NA		NA		NA		NA		NA		NA		NA		NA		NA		NA		NA		NA		NA		NA		NA		NA		NA		NA		NA		NA		NA		NA		NA
					NA		NA		NA		NA		NA		NA		NA		NA		NA		NA		NA		NA		NA		NA		NA		NA		NA		NA		NA		NA		NA		NA		NA
					NA		NA		NA		NA		NA		NA		NA		NA		NA		NA		NA		NA		NA		NA		NA		NA		NA		NA		NA		NA		NA		NA		NA
					NA		NA		NA		NA		NA		NA		NA		NA		NA		NA		NA		NA		NA		NA		NA		NA		NA		NA		NA		NA		NA		NA		NA
					NA		NA		NA		NA		NA		NA		NA		NA		NA		NA		NA		NA		NA		NA		NA		NA		NA		NA		NA		NA		NA		NA		NA
					NA		NA		NA		NA		NA		NA		NA		NA		NA		NA		NA		NA		NA		NA		NA		NA		NA		NA		NA		NA		NA		NA		NA
					NA		NA		NA		NA		NA		NA		NA		NA		NA		NA		NA		NA		NA		NA		NA		NA		NA		NA		NA		NA		NA		NA		NA
					NA		NA		NA		NA		NA		NA		NA		NA		NA		NA		NA		NA		NA		NA		NA		NA		NA		NA		NA		NA		NA		NA		NA
					NA		NA		NA		NA		NA		NA		NA		NA		NA		NA		NA		NA		NA		NA		NA		NA		NA		NA		NA		NA		NA		NA		NA
					NA		NA		NA		NA		NA		NA		NA		NA		NA		NA		NA		NA		NA		NA		NA		NA		NA		NA		NA		NA		NA		NA		NA
					NA		NA		NA		NA		NA		NA		NA		NA		NA		NA		NA		NA		NA		NA		NA		NA		NA		NA		NA		NA		NA		NA		NA
					NA		NA		NA		NA		NA		NA		NA		NA		NA		NA		NA		NA		NA		NA		NA		NA		NA		NA		NA		NA		NA		NA		NA
					NA		NA		NA		NA		NA		NA		NA		NA		NA		NA		NA		NA		NA		NA		NA		NA		NA		NA		NA		NA		NA		NA		NA
					NA		NA		NA		NA		NA		NA		NA		NA		NA		NA		NA		NA		NA		NA		NA		NA		NA		NA		NA		NA		NA		NA		NA
					NA		NA		NA		NA		NA		NA		NA		NA		NA		NA		NA		NA		NA		NA		NA		NA		NA		NA		NA		NA		NA		NA		NA
					NA		NA		NA		NA		NA		NA		NA		NA		NA		NA		NA		NA		NA		NA		NA		NA		NA		NA		NA		NA		NA		NA		NA
					NA		NA		NA		NA		NA		NA		NA		NA		NA		NA		NA		NA		NA		NA		NA		NA		NA		NA		NA		NA		NA		NA		NA
					NA		NA		NA		NA		NA		NA		NA		NA		NA		NA		NA		NA		NA		NA		NA		NA		NA		NA		NA		NA		NA		NA		NA
					NA		NA		NA		NA		NA		NA		NA		NA		NA		NA		NA		NA		NA		NA		NA		NA		NA		NA		NA		NA		NA		NA		NA
					NA		NA		NA		NA		NA		NA		NA		NA		NA		NA		NA		NA		NA		NA		NA		NA		NA		NA		NA		NA		NA		NA		NA
					NA		NA		NA		NA		NA		NA		NA		NA		NA		NA		NA		NA		NA		NA		NA		NA		NA		NA		NA		NA		NA		NA		NA
					NA		NA		NA		NA		NA		NA		NA		NA		NA		NA		NA		NA		NA		NA		NA		NA		NA		NA		NA		NA		NA		NA		NA
					NA		NA		NA		NA		NA		NA		NA		NA		NA		NA		NA		NA		NA		NA		NA		NA		NA		NA		NA		NA		NA		NA		NA
					NA		NA		NA		NA		NA		NA		NA		NA		NA		NA		NA		NA		NA		NA		NA		NA		NA		NA		NA		NA		NA		NA		NA
					NA		NA		NA		NA		NA		NA		NA		NA		NA		NA		NA		NA		NA		NA		NA		NA		NA		NA		NA		NA		NA		NA		NA
					NA		NA		NA		NA		NA		NA		NA		NA		NA		NA		NA		NA		NA		NA		NA		NA		NA		NA		NA		NA		NA		NA		NA
					NA		NA		NA		NA		NA		NA		NA		NA		NA		NA		NA		NA		NA		NA		NA		NA		NA		NA		NA		NA		NA		NA		NA
					NA		NA		NA		NA		NA		NA		NA		NA		NA		NA		NA		NA		NA		NA		NA		NA		NA		NA		NA		NA		NA		NA		NA
					NA		NA		NA		NA		NA		NA		NA		NA		NA		NA		NA		NA		NA		NA		NA		NA		NA		NA		NA		NA		NA		NA		NA
					NA		NA		NA		NA		NA		NA		NA		NA		NA		NA		NA		NA		NA		NA		NA		NA		NA		NA		NA		NA		NA		NA		NA
					NA		NA		NA		NA		NA		NA		NA		NA		NA		NA		NA		NA		NA		NA		NA		NA		NA		NA		NA		NA		NA		NA		NA
					NA		NA		NA		NA		NA		NA		NA		NA		NA		NA		NA		NA		NA		NA		NA		NA		NA		NA		NA		NA		NA		NA		NA
					NA		NA		NA		NA		NA		NA		NA		NA		NA		NA		NA		NA		NA		NA		NA		NA		NA		NA		NA		NA		NA		NA		NA
					NA		NA		NA		NA		NA		NA		NA		NA		NA		NA		NA		NA		NA		NA		NA		NA		NA		NA		NA		NA		NA		NA		NA
					NA		NA		NA		NA		NA		NA		NA		NA		NA		NA		NA		NA		NA		NA		NA		NA		NA		NA		NA		NA		NA		NA		NA
					NA		NA		NA		NA		NA		NA		NA		NA		NA		NA		NA		NA		NA		NA		NA		NA		NA		NA		NA		NA		NA		NA		NA
					NA		NA		NA		NA		NA		NA		NA		NA		NA		NA		NA		NA		NA		NA		NA		NA		NA		NA		NA		NA		NA		NA		NA
					NA		NA		NA		NA		NA		NA		NA		NA		NA		NA		NA		NA		NA		NA		NA		NA		NA		NA		NA		NA		NA		NA		NA
					NA		NA		NA		NA		NA		NA		NA		NA		NA		NA		NA		NA		NA		NA		NA		NA		NA		NA		NA		NA		NA		NA		NA
					NA		NA		NA		NA		NA		NA		NA		NA		NA		NA		NA		NA		NA		NA		NA		NA		NA		NA		NA		NA		NA		NA		NA
					NA		NA		NA		NA		NA		NA		NA		NA		NA		NA		NA		NA		NA		NA		NA		NA		NA		NA		NA		NA		NA		NA		NA
					NA		NA		NA		NA		NA		NA		NA		NA		NA		NA		NA		NA		NA		NA		NA		NA		NA		NA		NA		NA		NA		NA		NA
					NA		NA		NA		NA		NA		NA		NA		NA		NA		NA		NA		NA		NA		NA		NA		NA		NA		NA		NA		NA		NA		NA		NA
					NA		NA		NA		NA		NA		NA		NA		NA		NA		NA		NA		NA		NA		NA		NA		NA		NA		NA		NA		NA		NA		NA		NA
					NA		NA		NA		NA		NA		NA		NA		NA		NA		NA		NA		NA		NA		NA		NA		NA		NA		NA		NA		NA		NA		NA		NA
					NA		NA		NA		NA		NA		NA		NA		NA		NA		NA		NA		NA		NA		NA		NA		NA		NA		NA		NA		NA		NA		NA		NA
					NA		NA		NA		NA		NA		NA		NA		NA		NA		NA		NA		NA		NA		NA		NA		NA		NA		NA		NA		NA		NA		NA		NA
					NA		NA		NA		NA		NA		NA		NA		NA		NA		NA		NA		NA		NA		NA		NA		NA		NA		NA		NA		NA		NA		NA		NA
					NA		NA		NA		NA		NA		NA		NA		NA		NA		NA		NA		NA		NA		NA		NA		NA		NA		NA		NA		NA		NA		NA		NA
					NA		NA		NA		NA		NA		NA		NA		NA		NA		NA		NA		NA		NA		NA		NA		NA		NA		NA		NA		NA		NA		NA		NA
					NA		NA		NA		NA		NA		NA		NA		NA		NA		NA		NA		NA		NA		NA		NA		NA		NA		NA		NA		NA		NA		NA		NA
					NA		NA		NA		NA		NA		NA		NA		NA		NA		NA		NA		NA		NA		NA		NA		NA		NA		NA		NA		NA		NA		NA		NA
					NA		NA		NA		NA		NA		NA		NA		NA		NA		NA		NA		NA		NA		NA		NA		NA		NA		NA		NA		NA		NA		NA		NA
					NA		NA		NA		NA		NA		NA		NA		NA		NA		NA		NA		NA		NA		NA		NA		NA		NA		NA		NA		NA		NA		NA		NA
					NA		NA		NA		NA		NA		NA		NA		NA		NA		NA		NA		NA		NA		NA		NA		NA		NA		NA		NA		NA		NA		NA		NA
					NA		NA		NA		NA		NA		NA		NA		NA		NA		NA		NA		NA		NA		NA		NA		NA		NA		NA		NA		NA		NA		NA		NA
					NA		NA		NA		NA		NA		NA		NA		NA		NA		NA		NA		NA		NA		NA		NA		NA		NA		NA		NA		NA		NA		NA		NA
					NA		NA		NA		NA		NA		NA		NA		NA		NA		NA		NA		NA		NA		NA		NA		NA		NA		NA		NA		NA		NA		NA		NA
					NA		NA		NA		NA		NA		NA		NA		NA		NA		NA		NA		NA		NA		NA		NA		NA		NA		NA		NA		NA		NA		NA		NA
					NA		NA		NA		NA		NA		NA		NA		NA		NA		NA		NA		NA		NA		NA		NA		NA		NA		NA		NA		NA		NA		NA		NA
					NA		NA		NA		NA		NA		NA		NA		NA		NA		NA		NA		NA		NA		NA		NA		NA		NA		NA		NA		NA		NA		NA		NA
					NA		NA		NA		NA		NA		NA		NA		NA		NA		NA		NA		NA		NA		NA		NA		NA		NA		NA		NA		NA		NA		NA		NA
					NA		NA		NA		NA		NA		NA		NA		NA		NA		NA		NA		NA		NA		NA		NA		NA		NA		NA		NA		NA		NA		NA		NA
					NA		NA		NA		NA		NA		NA		NA		NA		NA		NA		NA		NA		NA		NA		NA		NA		NA		NA		NA		NA		NA		NA		NA
					NA		NA		NA		NA		NA		NA		NA		NA		NA		NA		NA		NA		NA		NA		NA		NA		NA		NA		NA		NA		NA		NA		NA
					NA		NA		NA		NA		NA		NA		NA		NA		NA		NA		NA		NA		NA		NA		NA		NA		NA		NA		NA		NA		NA		NA		NA
					NA		NA		NA		NA		NA		NA		NA		NA		NA		NA		NA		NA		NA		NA		NA		NA		NA		NA		NA		NA		NA		NA		NA
					NA		NA		NA		NA		NA		NA		NA		NA		NA		NA		NA		NA		NA		NA		NA		NA		NA		NA		NA		NA		NA		NA		NA
					NA		NA		NA		NA		NA		NA		NA		NA		NA		NA		NA		NA		NA		NA		NA		NA		NA		NA		NA		NA		NA		NA		NA
					NA		NA		NA		NA		NA		NA		NA		NA		NA		NA		NA		NA		NA		NA		NA		NA		NA		NA		NA		NA		NA		NA		NA
					NA		NA		NA		NA		NA		NA		NA		NA		NA		NA		NA		NA		NA		NA		NA		NA		NA		NA		NA		NA		NA		NA		NA
					NA		NA		NA		NA		NA		NA		NA		NA		NA		NA		NA		NA		NA		NA		NA		NA		NA		NA		NA		NA		NA		NA		NA
					NA		NA		NA		NA		NA		NA		NA		NA		NA		NA		NA		NA		NA		NA		NA		NA		NA		NA		NA		NA		NA		NA		NA
					NA		NA		NA		NA		NA		NA		NA		NA		NA		NA		NA		NA		NA		NA		NA		NA		NA		NA		NA		NA		NA		NA		NA
					NA		NA		NA		NA		NA		NA		NA		NA		NA		NA		NA		NA		NA		NA		NA		NA		NA		NA		NA		NA		NA		NA		NA
					NA		NA		NA		NA		NA		NA		NA		NA		NA		NA		NA		NA		NA		NA		NA		NA		NA		NA		NA		NA		NA		NA		NA
					NA		NA		NA		NA		NA		NA		NA		NA		NA		NA		NA		NA		NA		NA		NA		NA		NA		NA		NA		NA		NA		NA		NA
					NA		NA		NA		NA		NA		NA		NA		NA		NA		NA		NA		NA		NA		NA		NA		NA		NA		NA		NA		NA		NA		NA		NA
					NA		NA		NA		NA		NA		NA		NA		NA		NA		NA		NA		NA		NA		NA		NA		NA		NA		NA		NA		NA		NA		NA		NA
					NA		NA		NA		NA		NA		NA		NA		NA		NA		NA		NA		NA		NA		NA		NA		NA		NA		NA		NA		NA		NA		NA		NA
					NA		NA		NA		NA		NA		NA		NA		NA		NA		NA		NA		NA		NA		NA		NA		NA		NA		NA		NA		NA		NA		NA		NA
					NA		NA		NA		NA		NA		NA		NA		NA		NA		NA		NA		NA		NA		NA		NA		NA		NA		NA		NA		NA		NA		NA		NA
					NA		NA		NA		NA		NA		NA		NA		NA		NA		NA		NA		NA		NA		NA		NA		NA		NA		NA		NA		NA		NA		NA		NA
					NA		NA		NA		NA		NA		NA		NA		NA		NA		NA		NA		NA		NA		NA		NA		NA		NA		NA		NA		NA		NA		NA		NA
					NA		NA		NA		NA		NA		NA		NA		NA		NA		NA		NA		NA		NA		NA		NA		NA		NA		NA		NA		NA		NA		NA		NA
					NA		NA		NA		NA		NA		NA		NA		NA		NA		NA		NA		NA		NA		NA		NA		NA		NA		NA		NA		NA		NA		NA		NA
					NA		NA		NA		NA		NA		NA		NA		NA		NA		NA		NA		NA		NA		NA		NA		NA		NA		NA		NA		NA		NA		NA		NA
					NA		NA		NA		NA		NA		NA		NA		NA		NA		NA		NA		NA		NA		NA		NA		NA		NA		NA		NA		NA		NA		NA		NA
					NA		NA		NA		NA		NA		NA		NA		NA		NA		NA		NA		NA		NA		NA		NA		NA		NA		NA		NA		NA		NA		NA		NA
					NA		NA		NA		NA		NA		NA		NA		NA		NA		NA		NA		NA		NA		NA		NA		NA		NA		NA		NA		NA		NA		NA		NA
					NA		NA		NA		NA		NA		NA		NA		NA		NA		NA		NA		NA		NA		NA		NA		NA		NA		NA		NA		NA		NA		NA		NA
					NA		NA		NA		NA		NA		NA		NA		NA		NA		NA		NA		NA		NA		NA		NA		NA		NA		NA		NA		NA		NA		NA		NA
					NA		NA		NA		NA		NA		NA		NA		NA		NA		NA		NA		NA		NA		NA		NA		NA		NA		NA		NA		NA		NA		NA		NA
					NA		NA		NA		NA		NA		NA		NA		NA		NA		NA		NA		NA		NA		NA		NA		NA		NA		NA		NA		NA		NA		NA		NA
					NA		NA		NA		NA		NA		NA		NA		NA		NA		NA		NA		NA		NA		NA		NA		NA		NA		NA		NA		NA		NA		NA		NA
					NA		NA		NA		NA		NA		NA		NA		NA		NA		NA		NA		NA		NA		NA		NA		NA		NA		NA		NA		NA		NA		NA		NA
					NA		NA		NA		NA		NA		NA		NA		NA		NA		NA		NA		NA		NA		NA		NA		NA		NA		NA		NA		NA		NA		NA		NA
					NA		NA		NA		NA		NA		NA		NA		NA		NA		NA		NA		NA		NA		NA		NA		NA		NA		NA		NA		NA		NA		NA		NA
					NA		NA		NA		NA		NA		NA		NA		NA		NA		NA		NA		NA		NA		NA		NA		NA		NA		NA		NA		NA		NA		NA		NA
					NA		NA		NA		NA		NA		NA		NA		NA		NA		NA		NA		NA		NA		NA		NA		NA		NA		NA		NA		NA		NA		NA		NA
					NA		NA		NA		NA		NA		NA		NA		NA		NA		NA		NA		NA		NA		NA		NA		NA		NA		NA		NA		NA		NA		NA		NA
					NA		NA		NA		NA		NA		NA		NA		NA		NA		NA		NA		NA		NA		NA		NA		NA		NA		NA		NA		NA		NA		NA		NA
					NA		NA		NA		NA		NA		NA		NA		NA		NA		NA		NA		NA		NA		NA		NA		NA		NA		NA		NA		NA		NA		NA		NA
					NA		NA		NA		NA		NA		NA		NA		NA		NA		NA		NA		NA		NA		NA		NA		NA		NA		NA		NA		NA		NA		NA		NA
					NA		NA		NA		NA		NA		NA		NA		NA		NA		NA		NA		NA		NA		NA		NA		NA		NA		NA		NA		NA		NA		NA		NA
					NA		NA		NA		NA		NA		NA		NA		NA		NA		NA		NA		NA		NA		NA		NA		NA		NA		NA		NA		NA		NA		NA		NA
					NA		NA		NA		NA		NA		NA		NA		NA		NA		NA		NA		NA		NA		NA		NA		NA		NA		NA		NA		NA		NA		NA		NA
					NA		NA		NA		NA		NA		NA		NA		NA		NA		NA		NA		NA		NA		NA		NA		NA		NA		NA		NA		NA		NA		NA		NA
					NA		NA		NA		NA		NA		NA		NA		NA		NA		NA		NA		NA		NA		NA		NA		NA		NA		NA		NA		NA		NA		NA		NA
					NA		NA		NA		NA		NA		NA		NA		NA		NA		NA		NA		NA		NA		NA		NA		NA		NA		NA		NA		NA		NA		NA		NA
					NA		NA		NA		NA		NA		NA		NA		NA		NA		NA		NA		NA		NA		NA		NA		NA		NA		NA		NA		NA		NA		NA		NA
					NA		NA		NA		NA		NA		NA		NA		NA		NA		NA		NA		NA		NA		NA		NA		NA		NA		NA		NA		NA		NA		NA		NA
					NA		NA		NA		NA		NA		NA		NA		NA		NA		NA		NA		NA		NA		NA		NA		NA		NA		NA		NA		NA		NA		NA		NA
					NA		NA		NA		NA		NA		NA		NA		NA		NA		NA		NA		NA		NA		NA		NA		NA		NA		NA		NA		NA		NA		NA		NA
					NA		NA		NA		NA		NA		NA		NA		NA		NA		NA		NA		NA		NA		NA		NA		NA		NA		NA		NA		NA		NA		NA		NA
					NA		NA		NA		NA		NA		NA		NA		NA		NA		NA		NA		NA		NA		NA		NA		NA		NA		NA		NA		NA		NA		NA		NA
					NA		NA		NA		NA		NA		NA		NA		NA		NA		NA		NA		NA		NA		NA		NA		NA		NA		NA		NA		NA		NA		NA		NA
					NA		NA		NA		NA		NA		NA		NA		NA		NA		NA		NA		NA		NA		NA		NA		NA		NA		NA		NA		NA		NA		NA		NA
					NA		NA		NA		NA		NA		NA		NA		NA		NA		NA		NA		NA		NA		NA		NA		NA		NA		NA		NA		NA		NA		NA		NA
					NA		NA		NA		NA		NA		NA		NA		NA		NA		NA		NA		NA		NA		NA		NA		NA		NA		NA		NA		NA		NA		NA		NA
					NA		NA		NA		NA		NA		NA		NA		NA		NA		NA		NA		NA		NA		NA		NA		NA		NA		NA		NA		NA		NA		NA		NA
					NA		NA		NA		NA		NA		NA		NA		NA		NA		NA		NA		NA		NA		NA		NA		NA		NA		NA		NA		NA		NA		NA		NA
					NA		NA		NA		NA		NA		NA		NA		NA		NA		NA		NA		NA		NA		NA		NA		NA		NA		NA		NA		NA		NA		NA		NA
					NA		NA		NA		NA		NA		NA		NA		NA		NA		NA		NA		NA		NA		NA		NA		NA		NA		NA		NA		NA		NA		NA		NA
					NA		NA		NA		NA		NA		NA		NA		NA		NA		NA		NA		NA		NA		NA		NA		NA		NA		NA		NA		NA		NA		NA		NA
					NA		NA		NA		NA		NA		NA		NA		NA		NA		NA		NA		NA		NA		NA		NA		NA		NA		NA		NA		NA		NA		NA		NA
					NA		NA		NA		NA		NA		NA		NA		NA		NA		NA		NA		NA		NA		NA		NA		NA		NA		NA		NA		NA		NA		NA		NA
					NA		NA		NA		NA		NA		NA		NA		NA		NA		NA		NA		NA		NA		NA		NA		NA		NA		NA		NA		NA		NA		NA		NA
					NA		NA		NA		NA		NA		NA		NA		NA		NA		NA		NA		NA		NA		NA		NA		NA		NA		NA		NA		NA		NA		NA		NA
					NA		NA		NA		NA		NA		NA		NA		NA		NA		NA		NA		NA		NA		NA		NA		NA		NA		NA		NA		NA		NA		NA		NA
					NA		NA		NA		NA		NA		NA		NA		NA		NA		NA		NA		NA		NA		NA		NA		NA		NA		NA		NA		NA		NA		NA		NA
					NA		NA		NA		NA		NA		NA		NA		NA		NA		NA		NA		NA		NA		NA		NA		NA		NA		NA		NA		NA		NA		NA		NA
					NA		NA		NA		NA		NA		NA		NA		NA		NA		NA		NA		NA		NA		NA		NA		NA		NA		NA		NA		NA		NA		NA		NA
					NA		NA		NA		NA		NA		NA		NA		NA		NA		NA		NA		NA		NA		NA		NA		NA		NA		NA		NA		NA		NA		NA		NA
					NA		NA		NA		NA		NA		NA		NA		NA		NA		NA		NA		NA		NA		NA		NA		NA		NA		NA		NA		NA		NA		NA		NA
					NA		NA		NA		NA		NA		NA		NA		NA		NA		NA		NA		NA		NA		NA		NA		NA		NA		NA		NA		NA		NA		NA		NA
					NA		NA		NA		NA		NA		NA		NA		NA		NA		NA		NA		NA		NA		NA		NA		NA		NA		NA		NA		NA		NA		NA		NA
					NA		NA		NA		NA		NA		NA		NA		NA		NA		NA		NA		NA		NA		NA		NA		NA		NA		NA		NA		NA		NA		NA		NA
					NA		NA		NA		NA		NA		NA		NA		NA		NA		NA		NA		NA		NA		NA		NA		NA		NA		NA		NA		NA		NA		NA		NA
					NA		NA		NA		NA		NA		NA		NA		NA		NA		NA		NA		NA		NA		NA		NA		NA		NA		NA		NA		NA		NA		NA		NA
					NA		NA		NA		NA		NA		NA		NA		NA		NA		NA		NA		NA		NA		NA		NA		NA		NA		NA		NA		NA		NA		NA		NA
					NA		NA		NA		NA		NA		NA		NA		NA		NA		NA		NA		NA		NA		NA		NA		NA		NA		NA		NA		NA		NA		NA		NA
					NA		NA		NA		NA		NA		NA		NA		NA		NA		NA		NA		NA		NA		NA		NA		NA		NA		NA		NA		NA		NA		NA		NA
					NA		NA		NA		NA		NA		NA		NA		NA		NA		NA		NA		NA		NA		NA		NA		NA		NA		NA		NA		NA		NA		NA		NA
					NA		NA		NA		NA		NA		NA		NA		NA		NA		NA		NA		NA		NA		NA		NA		NA		NA		NA		NA		NA		NA		NA		NA
					NA		NA		NA		NA		NA		NA		NA		NA		NA		NA		NA		NA		NA		NA		NA		NA		NA		NA		NA		NA		NA		NA		NA
					NA		NA		NA		NA		NA		NA		NA		NA		NA		NA		NA		NA		NA		NA		NA		NA		NA		NA		NA		NA		NA		NA		NA
					NA		NA		NA		NA		NA		NA		NA		NA		NA		NA		NA		NA		NA		NA		NA		NA		NA		NA		NA		NA		NA		NA		NA
					NA		NA		NA		NA		NA		NA		NA		NA		NA		NA		NA		NA		NA		NA		NA		NA		NA		NA		NA		NA		NA		NA		NA
					NA		NA		NA		NA		NA		NA		NA		NA		NA		NA		NA		NA		NA		NA		NA		NA		NA		NA		NA		NA		NA		NA		NA
					NA		NA		NA		NA		NA		NA		NA		NA		NA		NA		NA		NA		NA		NA		NA		NA		NA		NA		NA		NA		NA		NA		NA
					NA		NA		NA		NA		NA		NA		NA		NA		NA		NA		NA		NA		NA		NA		NA		NA		NA		NA		NA		NA		NA		NA		NA
					NA		NA		NA		NA		NA		NA		NA		NA		NA		NA		NA		NA		NA		NA		NA		NA		NA		NA		NA		NA		NA		NA		NA
					NA		NA		NA		NA		NA		NA		NA		NA		NA		NA		NA		NA		NA		NA		NA		NA		NA		NA		NA		NA		NA		NA		NA
					NA		NA		NA		NA		NA		NA		NA		NA		NA		NA		NA		NA		NA		NA		NA		NA		NA		NA		NA		NA		NA		NA		NA
					NA		NA		NA		NA		NA		NA		NA		NA		NA		NA		NA		NA		NA		NA		NA		NA		NA		NA		NA		NA		NA		NA		NA
					NA		NA		NA		NA		NA		NA		NA		NA		NA		NA		NA		NA		NA		NA		NA		NA		NA		NA		NA		NA		NA		NA		NA
					NA		NA		NA		NA		NA		NA		NA		NA		NA		NA		NA		NA		NA		NA		NA		NA		NA		NA		NA		NA		NA		NA		NA
					NA		NA		NA		NA		NA		NA		NA		NA		NA		NA		NA		NA		NA		NA		NA		NA		NA		NA		NA		NA		NA		NA		NA
					NA		NA		NA		NA		NA		NA		NA		NA		NA		NA		NA		NA		NA		NA		NA		NA		NA		NA		NA		NA		NA		NA		NA
					NA		NA		NA		NA		NA		NA		NA		NA		NA		NA		NA		NA		NA		NA		NA		NA		NA		NA		NA		NA		NA		NA		NA
					NA		NA		NA		NA		NA		NA		NA		NA		NA		NA		NA		NA		NA		NA		NA		NA		NA		NA		NA		NA		NA		NA		NA
					NA		NA		NA		NA		NA		NA		NA		NA		NA		NA		NA		NA		NA		NA		NA		NA		NA		NA		NA		NA		NA		NA		NA
					NA		NA		NA		NA		NA		NA		NA		NA		NA		NA		NA		NA		NA		NA		NA		NA		NA		NA		NA		NA		NA		NA		NA
					NA		NA		NA		NA		NA		NA		NA		NA		NA		NA		NA		NA		NA		NA		NA		NA		NA		NA		NA		NA		NA		NA		NA
					NA		NA		NA		NA		NA		NA		NA		NA		NA		NA		NA		NA		NA		NA		NA		NA		NA		NA		NA		NA		NA		NA		NA
					NA		NA		NA		NA		NA		NA		NA		NA		NA		NA		NA		NA		NA		NA		NA		NA		NA		NA		NA		NA		NA		NA		NA
					NA		NA		NA		NA		NA		NA		NA		NA		NA		NA		NA		NA		NA		NA		NA		NA		NA		NA		NA		NA		NA		NA		NA
					NA		NA		NA		NA		NA		NA		NA		NA		NA		NA		NA		NA		NA		NA		NA		NA		NA		NA		NA		NA		NA		NA		NA
					NA		NA		NA		NA		NA		NA		NA		NA		NA		NA		NA		NA		NA		NA		NA		NA		NA		NA		NA		NA		NA		NA		NA
					NA		NA		NA		NA		NA		NA		NA		NA		NA		NA		NA		NA		NA		NA		NA		NA		NA		NA		NA		NA		NA		NA		NA
					NA		NA		NA		NA		NA		NA		NA		NA		NA		NA		NA		NA		NA		NA		NA		NA		NA		NA		NA		NA		NA		NA		NA
					NA		NA		NA		NA		NA		NA		NA		NA		NA		NA		NA		NA		NA		NA		NA		NA		NA		NA		NA		NA		NA		NA		NA
					NA		NA		NA		NA		NA		NA		NA		NA		NA		NA		NA		NA		NA		NA		NA		NA		NA		NA		NA		NA		NA		NA		NA
					NA		NA		NA		NA		NA		NA		NA		NA		NA		NA		NA		NA		NA		NA		NA		NA		NA		NA		NA		NA		NA		NA		NA
					NA		NA		NA		NA		NA		NA		NA		NA		NA		NA		NA		NA		NA		NA		NA		NA		NA		NA		NA		NA		NA		NA		NA
					NA		NA		NA		NA		NA		NA		NA		NA		NA		NA		NA		NA		NA		NA		NA		NA		NA		NA		NA		NA		NA		NA		NA
					NA		NA		NA		NA		NA		NA		NA		NA		NA		NA		NA		NA		NA		NA		NA		NA		NA		NA		NA		NA		NA		NA		NA
					NA		NA		NA		NA		NA		NA		NA		NA		NA		NA		NA		NA		NA		NA		NA		NA		NA		NA		NA		NA		NA		NA		NA
					NA		NA		NA		NA		NA		NA		NA		NA		NA		NA		NA		NA		NA		NA		NA		NA		NA		NA		NA		NA		NA		NA		NA
					NA		NA		NA		NA		NA		NA		NA		NA		NA		NA		NA		NA		NA		NA		NA		NA		NA		NA		NA		NA		NA		NA		NA
					NA		NA		NA		NA		NA		NA		NA		NA		NA		NA		NA		NA		NA		NA		NA		NA		NA		NA		NA		NA		NA		NA		NA
					NA		NA		NA		NA		NA		NA		NA		NA		NA		NA		NA		NA		NA		NA		NA		NA		NA		NA		NA		NA		NA		NA		NA
					NA		NA		NA		NA		NA		NA		NA		NA		NA		NA		NA		NA		NA		NA		NA		NA		NA		NA		NA		NA		NA		NA		NA
					NA		NA		NA		NA		NA		NA		NA		NA		NA		NA		NA		NA		NA		NA		NA		NA		NA		NA		NA		NA		NA		NA		NA
					NA		NA		NA		NA		NA		NA		NA		NA		NA		NA		NA		NA		NA		NA		NA		NA		NA		NA		NA		NA		NA		NA		NA
					NA		NA		NA		NA		NA		NA		NA		NA		NA		NA		NA		NA		NA		NA		NA		NA		NA		NA		NA		NA		NA		NA		NA
					NA		NA		NA		NA		NA		NA		NA		NA		NA		NA		NA		NA		NA		NA		NA		NA		NA		NA		NA		NA		NA		NA		NA
					NA		NA		NA		NA		NA		NA		NA		NA		NA		NA		NA		NA		NA		NA		NA		NA		NA		NA		NA		NA		NA		NA		NA
					NA		NA		NA		NA		NA		NA		NA		NA		NA		NA		NA		NA		NA		NA		NA		NA		NA		NA		NA		NA		NA		NA		NA
					NA		NA		NA		NA		NA		NA		NA		NA		NA		NA		NA		NA		NA		NA		NA		NA		NA		NA		NA		NA		NA		NA		NA
					NA		NA		NA		NA		NA		NA		NA		NA		NA		NA		NA		NA		NA		NA		NA		NA		NA		NA		NA		NA		NA		NA		NA
					NA		NA		NA		NA		NA		NA		NA		NA		NA		NA		NA		NA		NA		NA		NA		NA		NA		NA		NA		NA		NA		NA		NA
					NA		NA		NA		NA		NA		NA		NA		NA		NA		NA		NA		NA		NA		NA		NA		NA		NA		NA		NA		NA		NA		NA		NA
					NA		NA		NA		NA		NA		NA		NA		NA		NA		NA		NA		NA		NA		NA		NA		NA		NA		NA		NA		NA		NA		NA		NA
					NA		NA		NA		NA		NA		NA		NA		NA		NA		NA		NA		NA		NA		NA		NA		NA		NA		NA		NA		NA		NA		NA		NA
					NA		NA		NA		NA		NA		NA		NA		NA		NA		NA		NA		NA		NA		NA		NA		NA		NA		NA		NA		NA		NA		NA		NA
					NA		NA		NA		NA		NA		NA		NA		NA		NA		NA		NA		NA		NA		NA		NA		NA		NA		NA		NA		NA		NA		NA		NA
					NA		NA		NA		NA		NA		NA		NA		NA		NA		NA		NA		NA		NA		NA		NA		NA		NA		NA		NA		NA		NA		NA		NA
					NA		NA		NA		NA		NA		NA		NA		NA		NA		NA		NA		NA		NA		NA		NA		NA		NA		NA		NA		NA		NA		NA		NA
					NA		NA		NA		NA		NA		NA		NA		NA		NA		NA		NA		NA		NA		NA		NA		NA		NA		NA		NA		NA		NA		NA		NA
					NA		NA		NA		NA		NA		NA		NA		NA		NA		NA		NA		NA		NA		NA		NA		NA		NA		NA		NA		NA		NA		NA		NA
					NA		NA		NA		NA		NA		NA		NA		NA		NA		NA		NA		NA		NA		NA		NA		NA		NA		NA		NA		NA		NA		NA		NA
					NA		NA		NA		NA		NA		NA		NA		NA		NA		NA		NA		NA		NA		NA		NA		NA		NA		NA		NA		NA		NA		NA		NA
					NA		NA		NA		NA		NA		NA		NA		NA		NA		NA		NA		NA		NA		NA		NA		NA		NA		NA		NA		NA		NA		NA		NA
					NA		NA		NA		NA		NA		NA		NA		NA		NA		NA		NA		NA		NA		NA		NA		NA		NA		NA		NA		NA		NA		NA		NA
					NA		NA		NA		NA		NA		NA		NA		NA		NA		NA		NA		NA		NA		NA		NA		NA		NA		NA		NA		NA		NA		NA		NA
					NA		NA		NA		NA		NA		NA		NA		NA		NA		NA		NA		NA		NA		NA		NA		NA		NA		NA		NA		NA		NA		NA		NA
					NA		NA		NA		NA		NA		NA		NA		NA		NA		NA		NA		NA		NA		NA		NA		NA		NA		NA		NA		NA		NA		NA		NA
					NA		NA		NA		NA		NA		NA		NA		NA		NA		NA		NA		NA		NA		NA		NA		NA		NA		NA		NA		NA		NA		NA		NA
					NA		NA		NA		NA		NA		NA		NA		NA		NA		NA		NA		NA		NA		NA		NA		NA		NA		NA		NA		NA		NA		NA		NA
					NA		NA		NA		NA		NA		NA		NA		NA		NA		NA		NA		NA		NA		NA		NA		NA		NA		NA		NA		NA		NA		NA		NA
					NA		NA		NA		NA		NA		NA		NA		NA		NA		NA		NA		NA		NA		NA		NA		NA		NA		NA		NA		NA		NA		NA		NA
					NA		NA		NA		NA		NA		NA		NA		NA		NA		NA		NA		NA		NA		NA		NA		NA		NA		NA		NA		NA		NA		NA		NA
					NA		NA		NA		NA		NA		NA		NA		NA		NA		NA		NA		NA		NA		NA		NA		NA		NA		NA		NA		NA		NA		NA		NA
					NA		NA		NA		NA		NA		NA		NA		NA		NA		NA		NA		NA		NA		NA		NA		NA		NA		NA		NA		NA		NA		NA		NA
					NA		NA		NA		NA		NA		NA		NA		NA		NA		NA		NA		NA		NA		NA		NA		NA		NA		NA		NA		NA		NA		NA		NA
					NA		NA		NA		NA		NA		NA		NA		NA		NA		NA		NA		NA		NA		NA		NA		NA		NA		NA		NA		NA		NA		NA		NA
					NA		NA		NA		NA		NA		NA		NA		NA		NA		NA		NA		NA		NA		NA		NA		NA		NA		NA		NA		NA		NA		NA		NA
					NA		NA		NA		NA		NA		NA		NA		NA		NA		NA		NA		NA		NA		NA		NA		NA		NA		NA		NA		NA		NA		NA		NA
					NA		NA		NA		NA		NA		NA		NA		NA		NA		NA		NA		NA		NA		NA		NA		NA		NA		NA		NA		NA		NA		NA		NA
					NA		NA		NA		NA		NA		NA		NA		NA		NA		NA		NA		NA		NA		NA		NA		NA		NA		NA		NA		NA		NA		NA		NA
					NA		NA		NA		NA		NA		NA		NA		NA		NA		NA		NA		NA		NA		NA		NA		NA		NA		NA		NA		NA		NA		NA		NA
					NA		NA		NA		NA		NA		NA		NA		NA		NA		NA		NA		NA		NA		NA		NA		NA		NA		NA		NA		NA		NA		NA		NA
					NA		NA		NA		NA		NA		NA		NA		NA		NA		NA		NA		NA		NA		NA		NA		NA		NA		NA		NA		NA		NA		NA		NA
					NA		NA		NA		NA		NA		NA		NA		NA		NA		NA		NA		NA		NA		NA		NA		NA		NA		NA		NA		NA		NA		NA		NA
					NA		NA		NA		NA		NA		NA		NA		NA		NA		NA		NA		NA		NA		NA		NA		NA		NA		NA		NA		NA		NA		NA		NA
					NA		NA		NA		NA		NA		NA		NA		NA		NA		NA		NA		NA		NA		NA		NA		NA		NA		NA		NA		NA		NA		NA		NA
					NA		NA		NA		NA		NA		NA		NA		NA		NA		NA		NA		NA		NA		NA		NA		NA		NA		NA		NA		NA		NA		NA		NA
					NA		NA		NA		NA		NA		NA		NA		NA		NA		NA		NA		NA		NA		NA		NA		NA		NA		NA		NA		NA		NA		NA		NA
					NA		NA		NA		NA		NA		NA		NA		NA		NA		NA		NA		NA		NA		NA		NA		NA		NA		NA		NA		NA		NA		NA		NA
					NA		NA		NA		NA		NA		NA		NA		NA		NA		NA		NA		NA		NA		NA		NA		NA		NA		NA		NA		NA		NA		NA		NA
					NA		NA		NA		NA		NA		NA		NA		NA		NA		NA		NA		NA		NA		NA		NA		NA		NA		NA		NA		NA		NA		NA		NA
					NA		NA		NA		NA		NA		NA		NA		NA		NA		NA		NA		NA		NA		NA		NA		NA		NA		NA		NA		NA		NA		NA		NA
					NA		NA		NA		NA		NA		NA		NA		NA		NA		NA		NA		NA		NA		NA		NA		NA		NA		NA		NA		NA		NA		NA		NA
					NA		NA		NA		NA		NA		NA		NA		NA		NA		NA		NA		NA		NA		NA		NA		NA		NA		NA		NA		NA		NA		NA		NA
					NA		NA		NA		NA		NA		NA		NA		NA		NA		NA		NA		NA		NA		NA		NA		NA		NA		NA		NA		NA		NA		NA		NA
					NA		NA		NA		NA		NA		NA		NA		NA		NA		NA		NA		NA		NA		NA		NA		NA		NA		NA		NA		NA		NA		NA		NA
					NA		NA		NA		NA		NA		NA		NA		NA		NA		NA		NA		NA		NA		NA		NA		NA		NA		NA		NA		NA		NA		NA		NA
					NA		NA		NA		NA		NA		NA		NA		NA		NA		NA		NA		NA		NA		NA		NA		NA		NA		NA		NA		NA		NA		NA		NA
					NA		NA		NA		NA		NA		NA		NA		NA		NA		NA		NA		NA		NA		NA		NA		NA		NA		NA		NA		NA		NA		NA		NA
					NA		NA		NA		NA		NA		NA		NA		NA		NA		NA		NA		NA		NA		NA		NA		NA		NA		NA		NA		NA		NA		NA		NA
					NA		NA		NA		NA		NA		NA		NA		NA		NA		NA		NA		NA		NA		NA		NA		NA		NA		NA		NA		NA		NA		NA		NA
					NA		NA		NA		NA		NA		NA		NA		NA		NA		NA		NA		NA		NA		NA		NA		NA		NA		NA		NA		NA		NA		NA		NA
					NA		NA		NA		NA		NA		NA		NA		NA		NA		NA		NA		NA		NA		NA		NA		NA		NA		NA		NA		NA		NA		NA		NA
					NA		NA		NA		NA		NA		NA		NA		NA		NA		NA		NA		NA		NA		NA		NA		NA		NA		NA		NA		NA		NA		NA		NA
					NA		NA		NA		NA		NA		NA		NA		NA		NA		NA		NA		NA		NA		NA		NA		NA		NA		NA		NA		NA		NA		NA		NA
					NA		NA		NA		NA		NA		NA		NA		NA		NA		NA		NA		NA		NA		NA		NA		NA		NA		NA		NA		NA		NA		NA		NA
					NA		NA		NA		NA		NA		NA		NA		NA		NA		NA		NA		NA		NA		NA		NA		NA		NA		NA		NA		NA		NA		NA		NA
					NA		NA		NA		NA		NA		NA		NA		NA		NA		NA		NA		NA		NA		NA		NA		NA		NA		NA		NA		NA		NA		NA		NA
					NA		NA		NA		NA		NA		NA		NA		NA		NA		NA		NA		NA		NA		NA		NA		NA		NA		NA		NA		NA		NA		NA		NA
					NA		NA		NA		NA		NA		NA		NA		NA		NA		NA		NA		NA		NA		NA		NA		NA		NA		NA		NA		NA		NA		NA		NA
[truncated: 1 more columns]

## Sheet: summary_nmol ml-1
group	sample_ID	data_file	L-Alanine	L-Arginine	L-Asparagine	L-Aspartic Acid	L-Cysteine	L-Cystine	L-Glutamic acid	L-Glutamine	L-Glycine	L-Histidine	L-Isoleucine	L-Leucine	L-Lysine	L-Methionine	L-Phenylalanine	L-Proline	L-Serine	L-Threonine	Tryptamine	L-Tryptophane	Tyramine	L-Tyrosine	L-Valine
L2	MET1-26 L2 R1	met1-26 l2 r1_ba4_01_54725.d.xms	0.11998	0.0717932	0	0.0259216	0	0.73679	0.157196	0.848153	5.81135	0.229739	0.104234	0	0.280591	0	0.129322	1.27449	0.0165379	0.959885	0	0.0951647	0	0.0859798	0.191267
EL3	MET1-26 EL3 R1	met1-26 el3 r1_ba5_01_54726.d.xms	2.86344	3.83149	1.17841	3.13997	0.0195859	0.357278	4.78127	33.0871	11.783	6.93125	5.39728	8.69448	11.5479	23.7072	2.4495	47.5367	2.61157	6.67725	0	1.83716	0	4.53947	7.13197
LL3	MET1-26 LL3 R1	met1-26 ll3 r1_ba6_01_54727.d.xms	1.40343	1.84616	0.215141	0.378458	0.0203361	0.414224	1.73235	5.88738	8.75733	1.90271	0.659992	1.04494	1.99962	7.87784	1.24783	13.9052	0.620216	2.13477	0	0.552086	0	1.19295	1.04138
PW	MET1-26 PW R1	met1-26 pw r1_ba7_01_54728.d.xms	5.91013	1.12034	5.57137	2.75834	0.0081626	0.0694337	12.4542	31.9349	38.48	8.23946	1.77797	2.89241	8.15717	5.65031	1.17876	52.2968	4.54882	4.68977	0	5.01642	0	11.8993	4.20726
PB	MET1-26 PB R1	met1-26 pb r1_ba8_01_54729.d.xms	0.416147	0.437327	0.111512	0.131254	0.00727485	0.47566	1.33986	1.99905	4.76659	0.380699	0.172461	0.327004	0.599784	0.166714	0.146334	1.20295	0.168958	0.822038	0	0.546877	0	3.3334	0.160134
NW	MET1-26 NW R1	met1-26 nw r1_bb1_01_54730.d.xms	0.224759	0.234885	0.0504387	0.0824449	0	0.557154	0.436354	0.907879	6.74311	0.103417	0.0374167	0.10653	0.278472	0.172155	0.0624931	0.631355	0.132883	0.715569	0	0.0440449	0	0.972821	0.12866
OW	MET1-26 W R1	met1-26 w r1_bb2_01_54731.d.xms	6.39364	4.6011	0.692306	2.23345	0	0	7.97707	18.5888	8.50332	3.94803	1.21537	1.35642	5.89243	6.00783	0.592389	21.8285	2.78832	2.21998	0.0856104	0.456599	0.60613	0.851653	2.3141
L2	MET1-26 L2 R2	met1-26 l2 r2_bb3_01_54734.d.xms	0.226663	0.513965	0.0972418	0.235145	0	0.438106	0.421518	1.97984	4.4186	0.445523	0.1794	0.223386	0.743569	0.34767	0.129911	2.4523	0.392317	0.931574	0	0.179204	0	0.26362	0.16704
EL3	MET1-26 EL3 R2	met1-26 el3 r2_bb4_01_54735.d.xms	0.472243	0.869723	0.235819	0.709703	0.00536542	0.491637	0.992197	5.17314	5.30831	1.79265	0.970741	1.3254	2.15155	2.96391	0.596142	9.4972	0.137148	1.78185	0	0.465972	0	0.672273	1.15635
LL3	MET1-26 LL3 R2	met1-26 ll3 r2_bb5_01_54736.d.xms	1.64579	2.22037	0.174565	1.36402	0.0358339	0.512714	2.00092	8.03756	8.12613	2.40037	0.807741	1.61382	2.81219	10.3109	1.55137	20.4829	0.360765	2.59417	0	0.839514	0	1.12621	1.12634
PW	MET1-26 PW R2	met1-26 pw r2_bb6_01_54737.d.xms	0.251347	0.15404	0.233045	0.108891	0	0.48871	0.76797	2.14569	10.6649	0.611131	0.0739281	0.138668	0.67298	0.368367	0.0481513	2.70491	0.190521	1.13895	0.00159271	0.2459	0	0.478797	0.234354
PB	MET1-26 PB R2	met1-26 pb r2_bb7_01_54738.d.xms	0.230716	0.155728	0	0.13844	0	0.606179	0.505433	0.571291	6.87243	0.182122	0.0423511	0.120384	0.156876	0.0894396	0.0608268	0.352221	0.325068	0.871421	0.000404339	0.178123	0	1.69001	0.105245
NW	MET1-26 NW R2	met1-26 nw r2_bb8_01_54739.d.xms	0.21883	0.270236	0.0519004	0.101507	0	0.597631	0.323956	0.779802	7.45399	0.130576	0.0647278	0.124035	0.258755	0.273773	0.0654687	0.579285	0.157794	0.929396	0	0.040063	0	0.40911	0.103498
OW	MET1-26 W R2	met1-26 w r2_bc1_01_54740.d.xms	0.117632	0.153374	0	0.0374537	0	0.596009	0.180112	0.365588	5.73468	0.0980172	0.0169728	0.0161029	0.0895042	0.168412	0.0073198	0.483084	0.057802	0.656676	0.00317987	0.00224332	0.0260395	0.0248366	0.0336235
L2	MET5-26 L2 R3	met5-26 l2 r3_bc2_01_54743.d.xms	0.200362	0.134501	0	0.166929	0	0.465053	0.289751	0.879445	4.95533	0.420862	0.280631	0.411553	0.305312	0.979836	0.162417	2.06592	0.364699	0.891518	0	0.108643	0	0.147788	0.300892
EL3	MET5-26 EL3 R3	met5-26 el3 r3_bc3_01_54744.d.xms	21.2445	9.70069	2.49703	4.89909	0.0397217	0	14.4796	68.671	47.0448	16.9562	13.0391	18.888	23.7264	97.8354	8.33379	138.232	12.36	19.4534	0	5.52579	0	8.25482	17.524
LL3	MET5-26 LL3 R3	met5-26 ll3 r3_bc4_01_54745.d.xms	20.9827	18.4635	4.60036	3.91201	0.0191112	0	27.2167	78.9835	77.4368	33.7789	8.20568	18.7321	21.0034	116.167	14.4741	341.266	15.1836	29.0163	0	7.72716	0	18.0211	25.3044
PW	MET5-26 PW R3	met5-26 pw r3_bc5_01_54746.d.xms	2.00579	0.718414	1.21091	0.718417	0.0079884	0.347009	3.62172	8.53277	22.7996	2.09892	0.457277	0.773774	2.55082	1.52122	0.300611	13.3903	1.82912	1.97936	0	1.45976	0	2.07334	1.25368
PB	MET5-26 PB R3	met5-26 pb r3_bc6_01_54747.d.xms	0.633009	0.554743	0.147415	0.283834	0	0.466764	1.48597	1.88224	27.853	0.448795	0.129302	0.260251	0.570459	0.23966	0.147092	1.09153	0.330763	0.905748	0	0.370651	0	2.91171	0.199559
NW	MET5-26 NW R3	met5-26 nw r3_bc7_01_54748.d.xms	0.613003	0.508817	0.114649	0.29296	0	0.426291	0.568151	1.01461	10.249	0.353092	0.122918	0.249525	0.357908	0.528698	0.160984	0.913359	0.989883	1.12115	0.00149761	0.0544447	0	0.782562	0.284666
OW	MET5-26 W R3	met5-26 w r3_bc8_01_54749.d.xms	0.130955	0.163972	0	0.0441679	0	0.582354	0.267497	0.473938	9.21482	0.0727065	0.0255253	0.0375063	0.128562	0.22012	0.0146643	0.679368	0.135659	0.762949	0	0.0106135	0	0.0456897	0.0774368
L2	MET5-26 L2 R4	met5-26 l2 r4_bd1_01_54752.d.xms	4.36944	2.98979	1.06983	4.31388	0	0	6.72336	28.5919	6.96577	6.98586	4.33978	6.89613	11.5061	17.8387	1.65291	53.3278	3.41896	5.48626	0	2.38512	0	1.37391	4.93219
EL3	MET5-26 EL3 R4	met5-26 el3 r4_bd2_01_54753.d.xms	1.20551	0.548028	0.183286	0.826714	0	0.455595	0.595965	1.13268	10.5292	1.10136	0.333744	0.480374	0.455519	1.9633	0.303594	3.83016	3.38616	1.45856	0	0.132024	0	0.36891	0.515327
LL3	MET5-26 LL3 R4	met5-26 ll3 r4_bd3_01_54754.d.xms	37.8795	18.3722	4.71252	12.9938	0.0406635	0	21.7438	142.731	93.4381	29.5578	24.9417	37.4503	44.9294	191.684	25.4767	374.224	24.0985	38.9289	0	9.28225	0	22.4451	38.2516
PW	MET5-26 PW R4	met5-26 pw r4_bd4_01_54755.d.xms	1.62199	0.600753	0.99683	0.448628	0	0.417239	3.04072	7.67457	14.1982	1.70669	0.51102	0.766859	2.40518	1.42869	0.22241	10.5239	1.14073	1.66533	0	0.746845	0	0.661845	1.32912
PB	MET5-26 PB R4	met5-26 pb r4_bd5_01_54756.d.xms	0.278953	0.205907	0	0.121348	0	0.519523	0.434815	0.678198	7.13898	0.153212	0.0422873	0.0796183	0.197272	0	0.0499427	0.317976	0.244166	0.698856	0	0.133003	0	0.926435	0.0509877
NW	MET5-26 NW R4	met5-26 nw r4_bd6_01_54757.d.xms	0.155803	0.182174	0.051101	0.0756689	0	0.671385	0.295453	0.708536	4.62507	0.0586952	0.0396311	0.0919147	0.236283	0.227515	0.0410767	0.521973	0.0376432	0.683113	0	0.0193114	0	0.386029	0.0902241
OW	MET5-26 W R4	met5-26 w r4_bd7_01_54758.d.xms	0.194677	0.339659	0.0554044	0.10204	0	0.480806	0.410792	0.758403	7.08293	0.160652	0.0905608	0.123247	0.237619	0.493213	0.0428696	1.28681	0.096811	0.81047	0.00581756	0.0455651	0.0298671	0.0712705	0.156602
L2	MET5-26 L2 R5	met5-26 l2 r5_bd8_01_54761.d.xms	1.36096	0.853542	0.512552	0.677851	0	0.244359	2.54056	9.69484	7.05672	1.87509	1.04549	1.80831	3.7718	4.37837	0.545857	12.7318	1.37663	2.1707	0	0.56434	0	0.725172	1.54278
EL3	MET5-26 EL3 R5	met5-26 el3 r5_be1_01_54762.d.xms	10.6775	10.8726	4.01783	6.17686	0.0160533	0	14.2894	79.564	21.8459	14.6249	13.0719	17.6406	31.8099	44.9531	6.98591	133.719	9.33878	17.5407	0	5.29753	0	7.68183	16.7204
LL3	MET5-26 LL3 R5	met5-26 ll3 r5_be2_01_54763.d.xms	19.5576	16.4524	5.71632	9.41389	0.0729279	0	25.3965	83.8821	58.4078	27.3157	11.0411	18.9948	25.811	102.051	12.9754	347.695	10.7074	24.9247	0.00138171	7.42274	0	12.7505	20.499
PW	MET5-26 PW R5	met5-26 pw r5_be3_01_54764.d.xms	0.397279	0.185657	0.202618	0.0809309	0.00757345	0.522701	0.664438	1.60404	7.15242	0.554706	0.0543806	0.121643	0.523421	0.315824	0.0544089	2.43732	0.160824	1.04208	0	0.36514	0	0.982886	0.234625
PB	MET5-26 PB R5	met5-26 pb r5_be4_01_54765.d.xms	0.170445	0.137007	0	0.0789264	0	0.653834	0.284004	0.482161	7.7103	0.0928511	0.00691066	0.0142172	0.131189	0	0.0250396	0.219518	0.179696	0.803629	0	0.0276702	0	0.551798	0.0609437
NW	MET5-26 NW R5	met5-26 nw r5_be5_01_54766.d.xms	2.38201	2.1382	0.750017	1.01671	0	0.319573	4.0308	9.08815	10.6075	1.10811	0.768238	1.52491	3.12666	4.02435	0.850385	6.80389	0.901105	1.69258	0.00295507	0.330676	0	6.85245	1.82802
OW	MET5-26 W R5	met5-26 w r5_be6_01_54767.d.xms	0.174281	0.250617	0	0.105199	0	0.59802	0.37235	0.687847	8.22343	0.142638	0.0236588	0.0157608	0.197331	0.288183	0.00316655	0.853659	0.100449	0.818921	0.00407179	0.00870057	0.0479421	0.0251011	0.0625898
L2	MET6-26 L2 R6	met6-26 l2 r6_be7_01_54770.d.xms	3.21338	4.49665	1.01326	1.36324	0	0	5.46725	31.3484	5.87119	5.56873	5.77758	6.96695	13.2362	16.6025	3.25547	31.1726	3.26744	4.48786	0	3.13105	0	3.6294	6.03281
EL3	MET6-26 EL3 R6	met6-26 el3 r6_be8_01_54771.d.xms	8.26815	9.69711	2.83642	4.32383	0.00465058	0	9.83763	48.2968	18.6001	11.4485	7.57296	12.4149	16.9785	32.3317	4.05073	62.8581	7.05967	9.73325	0	3.14001	0	6.09389	10.7029
LL3	MET6-26 LL3 R6	met6-26 ll3 r6_ga1_01_54772.d.xms	13.1633	18.8599	6.77618	4.26868	0.0622654	0	22.7054	89.7565	38.3495	14.3871	6.08702	12.1707	27.0189	83.4455	9.62804	280.002	5.62009	19.1629	0	10.0814	0	29.0468	16.0541
PW	MET6-26 PW R6	met6-26 pw r6_ga2_01_54773.d.xms	9.27668	3.02841	7.39918	2.63087	0.00407953	0	16.8128	42.206	47.7807	14.3229	2.19505	3.52705	11.2054	10.2391	1.75993	64.4971	2.99116	5.84245	0	7.52041	0	23.0206	7.48367
PB	MET6-26 PB R6	met6-26 pb r6_ga3_01_54774.d.xms	3.56142	1.56189	0.657444	1.59571	0	0	8.37207	12.0621	3.42146	2.66944	1.24788	1.97393	3.41933	1.34558	1.17961	6.00893	1.3779	1.29632	0	2.49836	0	22.1615	1.62037
NW	MET6-26 NW R6	met6-26 nw r6_ga4_01_54775.d.xms	6.27805	4.17126	1.92869	3.07207	0	0	10.0434	19.9996	7.76973	3.22472	1.65793	3.38497	6.22186	8.66459	2.00534	18.3397	2.58648	2.70466	0.00536504	1.89329	0	22.8083	4.3995
OW	MET6-26 W R6	met6-26 w r6_ga5_01_54776.d.xms	0.316157	0.440227	0	0.146147	0	0.380371	0.792516	1.46586	8.69109	0.280102	0.0608873	0.0670962	0.438037	0.618521	0.00806167	2.10969	0.24171	0.705582	0.0175661	0.0162907	0.106604	0.128211	0.177017
L2	MET6-26 L2 R7	met6-26 l2 r7_ga6_01_54779.d.xms	7.94716	7.95846	3.0376	1.4122	0.00688191	0	11.8037	37.0136	14.7039	9.01755	5.98635	9.79194	12.563	21.1786	3.12876	46.0067	4.62325	6.65232	0	3.38458	0	5.51851	7.8974
EL3	MET6-26 EL3 R7	met6-26 el3 r7_ga7_01_54780.d.xms	10.4402	10.1637	3.26601	4.29457	0.0066684	0	10.7802	63.9538	17.0946	20.8579	11.1211	15.713	23.2741	51.9669	5.37449	107.528	8.419	13.7761	0.00334895	6.16868	0	6.38809	13.6065
LL3	MET6-26 LL3 R7	met6-26 ll3 r7_ga8_01_54781.d.xms	43.576	27.0299	15.1232	15.1509	0.0449857	0	28.7625	235.401	149.165	45.8483	29.02	48.2715	71.8763	218.163	28.2914	422.634	42.9987	50.5666	0	15.6263	0	33.4343	48.4858
PW	MET6-26 PW R7	met6-26 pw r7_gb1_01_54782.d.xms	8.88792	2.76333	5.4775	1.54928	0	0.0365065	14.286	35.4304	50.4881	12.9492	1.73036	2.95074	9.64646	11.1479	1.40454	52.4435	3.0036	5.54966	0.00322871	7.76704	0	23.355	6.9623
PB	MET6-26 PB R7	met6-26 pb r7_gb2_01_54783.d.xms	3.71486	1.90218	0.493608	1.54877	0	0.0449693	9.64307	12.6416	7.04802	3.01028	1.51041	3.19997	3.08029	2.73754	1.79294	6.71697	2.29831	2.00363	0	5.30152	0	44.1674	2.96676
NW	MET6-26 NW R7	met6-26 nw r7_gb3_01_54784.d.xms	7.18147	5.47458	2.08795	3.14216	0.011515	0	12.0113	23.5735	7.45442	3.74872	2.25023	4.1285	7.14146	10.3975	3.69423	20.3592	3.51075	3.23411	0.00754413	3.1058	0	36.2242	5.84336
OW	MET6-26 W R7	met6-26 w r7_gb4_01_54785.d.xms	3.77317	2.91686	0.331812	2.04495	0	0.0232682	5.62205	8.19207	0	2.58448	0.697598	0.711414	2.50628	7.44971	0.209146	13.574	1.62953	1.45222	0.121505	0.162037	0.78456	0.866987	1.46904
L2	MET6-26 L2 R8	met6-26 l2 r8_gb5_01_54788.d.xms	3.81483	4.27501	1.54544	1.98706	0	0.0258211	5.41155	24.8783	6.43609	6.02956	3.20903	5.99446	8.54184	15.3988	2.13592	30.4838	2.3285	4.11123	0	1.9124	0	3.12998	4.02777
EL3	MET6-26 EL3 R8	met6-26 el3 r8_gb6_01_54789.d.xms	8.48356	8.97584	2.9885	4.29796	0	0.0467144	10.3247	66.8702	27.0542	14.5031	9.7502	15.252	23.7997	36.5266	5.64814	84.2503	7.95501	12.4629	0	4.79297	0	8.42129	12.7939
LL3	MET6-26 LL3 R8	met6-26 ll3 r8_gb7_01_54790.d.xms	68.8597	45.7097	12.6895	19.3848	0.197372	0	47.0119	262.202	116.364	59.3348	29.3973	54.0078	74.9718	236.838	35.4033	612.664	6.91556	62.225	0	27.9062	0	33.8421	47.8814
PW	MET6-26 PW R8	met6-26 pw r8_gb8_01_54791.d.xms	7.9203	1.89232	5.42452	1.81207	0	0.036462	13.9863	36.0412	44.0999	9.49398	1.90807	3.19221	9.90128	8.47732	1.3812	56.1243	2.87643	5.3509	0	7.25949	0	12.628	5.6348
PB	MET6-26 PB R8	met6-26 pb r8_gc1_01_54792.d.xms	3.65115	1.94608	0.572955	1.79767	0	0.0418357	9.2212	11.1283	5.59091	3.30572	0.962987	2.27799	3.04766	2.28256	1.39615	7.3196	1.92483	2.06244	0	4.57016	0	37.3338	2.80175
NW	MET6-26 NW R8	met6-26 nw r8_gc2_01_54793.d.xms	0.175785	0.188215	0	0.0897155	0.00486045	0.483563	0.32566	0.804143	7.77968	0.159804	0.0171464	0.0708669	0.261072	0.135903	0.0434817	0.620865	0.249848	0.724235	0	0.0693466	0	1.20768	0.148148
OW	MET6-26 W R8	met6-26 w r8_gc3_01_54794.d.xms	3.6764	3.19949	0	1.67063	0.00634643	0	6.37043	8.57063	3.64258	2.36241	0.567079	0.357825	2.73631	7.5672	0.0901875	16.2223	1.58269	1.57538	0.0643782	0.110695	0.778575	1.8011	1.30335
L2	MET1-26 L2 R9	met1-26 l2 r9_gc4_01_54797.d.xms	0.687916	1.73505	0.469527	0.4233	0	0.46039	1.85236	7.75461	8.09813	1.5432	1.04334	1.65991	3.20173	3.49493	0.418991	8.50766	0.39634	1.93316	0	0.397285	0	0.919615	1.33694
EL3	MET1-26 EL3 R9	met1-26 el3 r9_gc5_01_54798.d.xms	9.94247	11.4856	4.99147	6.94548	0.053851	0.0222464	13.1648	70.1302	18.2817	16.7973	8.72705	14.8737	25.1665	40.6643	4.70446	95.1525	4.11626	12.802	0	3.89763	0	4.38746	10.4108
LL3	MET1-26 LL3 R9	met1-26 ll3 r9_gc6_01_54799.d.xms	0.971866	1.4161	0.435779	0.288178	0.0117216	0.490945	1.01803	5.20207	8.43004	1.36735	0.804074	1.51288	1.88584	6.75333	0.695694	11.1797	1.24895	1.97293	0	0.300938	0	1.06652	1.35399
PW	MET1-26 PW R9	met1-26 pw r9_gc7_01_54800.d.xms	1.11555	0.53161	0.921201	0.380859	0.0131542	0.542885	2.86997	7.42724	14.2834	2.13263	0.328891	0.531663	2.37199	1.61297	0.220398	10.8476	0.674556	1.6182	0	0.567846	0	2.14419	1.08077
PB	MET1-26 PB R9	met1-26 pb r9_gc8_01_54801.d.xms	0.11686	0.0680933	0	0.0529636	0	0.576921	0.277419	0.387735	4.5772	0.0512618	0.00667767	0.0349989	0.0739435	0.0403499	0.0224529	0.218035	0.056205	0.600679	0	0.0678116	0	0.746611	0.0213281
NW	MET1-26 NW R9	met1-26 nw r9_gd1_01_54802.d.xms	0.188827	0.186744	0.0601539	0.0915564	0	0.567964	0.407932	0.74184	5.96953	0.123899	0.0375934	0.102735	0.250705	0.267629	0.0639975	0.588596	0.106961	0.69641	0	0.0550338	0	0.734749	0.128801
OW	MET1-26 W R9	met1-26 w r9_gd2_01_54803.d.xms	0.60251	0.693262	0	0.462603	0	0.303106	1.35804	2.45427	6.28279	0.701907	0.098942	0.0157594	0.903001	1.87657	0.0268067	4.44721	0.386136	0.585245	0.0259965	0.0151365	0.288515	0.0837733	0.169718
group		mean	L-Alanine	L-Arginine	L-Asparagine	L-Aspartic Acid	L-Cysteine	L-Cystine	L-Glutamic acid	L-Glutamine	L-Glycine	L-Histidine	L-Isoleucine	L-Leucine	L-Lysine	L-Methionine	L-Phenylalanine	L-Proline	L-Serine	L-Threonine	Tryptamine	L-Tryptophane	Tyramine	L-Tyrosine	L-Valine
L2			2.43785	2.55875	0.860606	1.17839	0.000764656	0.263391	3.85191	15.8877	7.14635	3.56846	2.44065	3.75029	6.01669	8.91328	1.2844	20.8915	1.7983	3.06939	0	1.35087	0	1.75489	2.93656
EL3			8.17751	7.34942	2.46609	3.95713	0.0162107	0.152608	8.80509	48.5421	19.7269	11.6681	7.77601	11.698	17.6567	36.9903	4.27186	75.845	6.15373	10.6318	0.000372106	3.47309	0	5.20089	10.0625
LL3			23.1155	16.7078	5.60484	7.46165	0.0561353	0.157543	19.732	101.342	62.0527	23.9881	12.3294	21.5332	30.2565	108.143	14.416	269.339	11.9726	25.7251	0.000153523	8.85986	0	16.9918	22.222
PW			4.15411	1.22165	3.04857	1.16536	0.00455091	0.273439	7.61157	19.2219	27.7719	5.78996	1.00411	1.655	5.27052	4.52907	0.730044	29.474	1.93509	3.20852	0.000535713	3.43876	0	8.58267	3.15784
PB			1.41928	0.774329	0.220326	0.638769	0.000808316	0.376187	3.50709	4.64807	8.33098	1.14382	0.457918	0.920929	1.25298	0.766873	0.535598	2.6053	0.767322	1.11831	4.49266e-05	1.52157	0	12.647	0.887453
NW			1.93539	1.4839	0.5661	0.884978	0.00181949	0.402618	3.16033	6.402	7.62801	1.00123	0.555092	1.08711	2.0148	2.74357	0.776385	5.48424	0.963705	1.38902	0.00192909	0.623557	0	7.81977	1.43943
OW			1.70882	1.41762	0.119947	0.760738	0.000705158	0.329326	2.59454	4.61749	6.37507	1.15011	0.310732	0.300125	1.45879	2.74331	0.110512	6.83162	0.779901	1.06527	0.0364584	0.0919868	0.29647	0.43318	0.640385
		SE
L2			0.832008	0.830536	0.306584	0.425074	0.000720925	0.085997	1.2189	4.55004	0.957216	1.04943	0.762071	1.15242	1.71334	2.71477	0.406247	6.2655	0.525831	0.681667	0	0.426162	0	0.599017	0.902841
EL3			1.99243	1.36873	0.51735	0.667797	0.00593052	0.0675859	1.69671	9.14523	3.80113	2.1863	1.48714	2.13381	3.401	9.01739	0.859158	15.4149	1.2091	1.99512	0.000350824	0.700294	0	0.949431	1.92325
LL3			7.25897	4.47599	1.68229	2.21474	0.0178014	0.0747099	4.86272	30.1354	16.0858	6.5006	3.83027	6.42353	8.90232	28.6014	4.01768	66.4461	4.39725	6.87986	0.000144743	2.76702	0	4.3081	6.07034
PW			1.19424	0.341189	0.895642	0.330953	0.0015359	0.0733542	2.07183	5.24014	5.45053	1.72737	0.275033	0.452093	1.3691	1.38548	0.215574	8.16318	0.47658	0.653579	0.00035795	1.063	0	2.98977	0.921617
PB			0.526262	0.24939	0.086169	0.239472	0.000762088	0.0840293	1.32413	1.73351	2.34414	0.441026	0.190153	0.383122	0.459603	0.33915	0.222886	0.97292	0.27047	0.173692	4.23572e-05	0.656297	0	5.46635	0.389241
NW			0.885512	0.634553	0.267182	0.407051	0.00124932	0.0785437	1.45923	2.8837	0.592147	0.456155	0.264185	0.500674	0.884801	1.27735	0.400751	2.55559	0.393879	0.301926	0.000883177	0.348811	0	4.05655	0.688077
OW			0.727866	0.529746	0.0756021	0.294242	0.00066483	0.0819637	0.982077	1.93664	0.932286	0.45236	0.133312	0.144239	0.613272	1.02698	0.0604289	2.56078	0.308512	0.175227	0.0137523	0.046295	0.105206	0.194492	0.263328

## Sheet: result_calculation_nmol per ant
	IS batch	MBBD1153			L-Alanine		L-Arginine		L-Asparagine		L-Aspartic Acid		L-Cysteine		L-Cystine		L-Glutamic acid		L-Glutamine		L-Glycine		L-Histidine		L-Isoleucine		L-Leucine		L-Lysine		L-Methionine		L-Phenylalanine		L-Proline		L-Serine		L-Threonine		Tryptamine		L-Tryptophane		Tyramine		L-Tyrosine		L-Valine
	Extraction volume [µl]	400	Std	fmol/ng labAA	3547	lab-Ala (BA)	579	lab-Arg (BC)	1825	lab-Asx (BE)	1825	lab-Asx (BE)	328	lab-Tyr (CC)	328	lab-Tyr (CC)	1597	lab-Glx (BG)	1597	lab-Glx (BG)	8200	lab-Gly (BI)	124	lab-His (BK)	663	lab-Ile (BM)	1324	lab-Leu (BO)	223	lab-Lys (BQ)	1398	lab-Met (BS)	454	lab-Phe (BU)	1016	lab-Pro (BW)	1222	lab-Ser (BY)	1145	lab-Thr (CA)	328	lab-Tyr (CC)	454	lab-Phe (BU)	328	lab-Tyr (CC)	328	lab-Tyr (CC)	1299
	Dilution factor	2		nmol/uL	0.0017735		0.0002895		0.0009125		0.0009125		0.000164		0.000164		0.0007985		0.0007985		0.0041		6.2e-05		0.0003315		0.000662		0.0001115		0.000699		0.000227		0.000508		0.000611		0.0005725		0.000164		0.000227		0.000164		0.000164		0.0006495
	final ng labAA/µl	0.5	Capsule	RF	1		1		1		1		5.5		5.5		1		1		1		1		1		1		1		1		1		1		1		1		0.14		3.3		0.91		1		1
				Leaf	1		1		1		1		5.5		5.5		1		1		1		1		1		1		1		1		1		1		1		1		0.13		3.3		0.93		1		1
				Capsule	1		1		1		1		5.5		5.5		1		1		1		1		1		1		1		1		1		1		1		1		0.14		3.3		0.91		1		1
sample_ID	Plate_position	data_file	number/weight of ants	Seed	1		1		1		1		5.5		5.5		1		1		1		1		1		1		1		1		1		1		1		1		0.19		4.2		0.87		1		1
MET1-26 L2 R1		met1-26 l2 r1_ba4_01_54725.d.xms	1	tissue concentration nmol/g FW or /ant	0.0479919		0.0287173		0		0.0103686		0		0.294716		0.0628785		0.339261		2.32454		0.0918954		0.0416934		0		0.112236		0		0.0517287		0.509796		0.00661518		0.383954		0		0.0380659		0		0.0343919		0.0765068
MET1-26 EL3 R1		met1-26 el3 r1_ba5_01_54726.d.xms	1		1.14538		1.53259		0.471365		1.25599		0.00783436		0.142911		1.91251		13.2349		4.71321		2.7725		2.15891		3.47779		4.61917		9.48286		0.979801		19.0147		1.04463		2.6709		0		0.734865		0		1.81579		2.85279
MET1-26 LL3 R1		met1-26 ll3 r1_ba6_01_54727.d.xms	1		0.561373		0.738464		0.0860563		0.151383		0.00813446		0.16569		0.692939		2.35495		3.50293		0.761083		0.263997		0.417977		0.799848		3.15114		0.499132		5.56209		0.248086		0.85391		0		0.220834		0		0.477182		0.416553
MET1-26 PW R1		met1-26 pw r1_ba7_01_54728.d.xms	1		2.36405		0.448134		2.22855		1.10334		0.00326504		0.0277735		4.98167		12.7739		15.392		3.29578		0.71119		1.15697		3.26287		2.26012		0.471503		20.9187		1.81953		1.87591		0		2.00657		0		4.75973		1.6829
MET1-26 PB R1		met1-26 pb r1_ba8_01_54729.d.xms	1		0.166459		0.174931		0.0446049		0.0525017		0.00290994		0.190264		0.535944		0.79962		1.90664		0.15228		0.0689843		0.130801		0.239914		0.0666856		0.0585336		0.481181		0.0675832		0.328815		0		0.218751		0		1.33336		0.0640538
MET1-26 NW R1		met1-26 nw r1_bb1_01_54730.d.xms	1		0.0899034		0.0939541		0.0201755		0.0329779		0		0.222862		0.174542		0.363152		2.69724		0.041367		0.0149667		0.0426118		0.111389		0.0688619		0.0249972		0.252542		0.0531532		0.286228		0		0.017618		0		0.389128		0.0514639
MET1-26 W R1		met1-26 w r1_bb2_01_54731.d.xms	1		2.55746		1.84044		0.276922		0.893381		0		0		3.19083		7.43551		3.40133		1.57921		0.486147		0.542567		2.35697		2.40313		0.236956		8.73138		1.11533		0.887992		0.0342442		0.182639		0.242452		0.340661		0.925638
MET1-26 L2 R2		met1-26 l2 r2_bb3_01_54734.d.xms	1		0.0906654		0.205586		0.0388967		0.0940582		0		0.175242		0.168607		0.791936		1.76744		0.178209		0.07176		0.0893545		0.297428		0.139068		0.0519645		0.98092		0.156927		0.37263		0		0.0716818		0		0.105448		0.0668161
MET1-26 EL3 R2		met1-26 el3 r2_bb4_01_54735.d.xms	1		0.188897		0.347889		0.0943277		0.283881		0.00214617		0.196655		0.396879		2.06926		2.12332		0.71706		0.388296		0.530162		0.860618		1.18556		0.238457		3.79888		0.0548591		0.712739		0		0.186389		0		0.268909		0.462542
MET1-26 LL3 R2		met1-26 ll3 r2_bb5_01_54736.d.xms	1		0.658316		0.88815		0.0698262		0.545609		0.0143335		0.205085		0.800368		3.21502		3.25045		0.960149		0.323097		0.645529		1.12488		4.12437		0.620548		8.19316		0.144306		1.03767		0		0.335805		0		0.450483		0.450538
MET1-26 PW R2		met1-26 pw r2_bb6_01_54737.d.xms	1		0.100539		0.061616		0.093218		0.0435565		0		0.195484		0.307188		0.858278		4.26594		0.244452		0.0295712		0.0554671		0.269192		0.147347		0.0192605		1.08196		0.0762083		0.455578		0.000637084		0.0983599		0		0.191519		0.0937417
MET1-26 PB R2		met1-26 pb r2_bb7_01_54738.d.xms	1		0.0922864		0.0622912		0		0.0553758		0		0.242471		0.202173		0.228516		2.74897		0.0728487		0.0169404		0.0481534		0.0627506		0.0357758		0.0243307		0.140888		0.130027		0.348569		0.000161736		0.0712493		0		0.676005		0.0420981
MET1-26 NW R2		met1-26 nw r2_bb8_01_54739.d.xms	1		0.087532		0.108095		0.0207601		0.0406026		0		0.239053		0.129582		0.311921		2.9816		0.0522303		0.0258911		0.0496139		0.103502		0.109509		0.0261875		0.231714		0.0631177		0.371758		0		0.0160252		0		0.163644		0.0413993
MET1-26 W R2		met1-26 w r2_bc1_01_54740.d.xms	1		0.0470528		0.0613495		0		0.0149815		0		0.238404		0.0720448		0.146235		2.29387		0.0392069		0.0067891		0.00644116		0.0358017		0.0673649		0.00292792		0.193234		0.0231208		0.262671		0.00127195		0.000897327		0.0104158		0.00993464		0.0134494
MET5-26 L2 R3		met5-26 l2 r3_bc2_01_54743.d.xms	1		0.0801448		0.0538004		0		0.0667716		0		0.186021		0.1159		0.351778		1.98213		0.168345		0.112253		0.164621		0.122125		0.391934		0.0649668		0.826368		0.14588		0.356607		0		0.0434573		0		0.0591154		0.120357
MET5-26 EL3 R3		met5-26 el3 r3_bc3_01_54744.d.xms	1		8.49781		3.88028		0.99881		1.95964		0.0158887		0		5.79184		27.4684		18.8179		6.78247		5.21566		7.55519		9.49056		39.1342		3.33351		55.2929		4.94399		7.78136		0		2.21031		0		3.30193		7.00961
MET5-26 LL3 R3		met5-26 ll3 r3_bc4_01_54745.d.xms	1		8.39306		7.3854		1.84014		1.5648		0.00764448		0		10.8867		31.5934		30.9747		13.5116		3.28227		7.49286		8.40135		46.4666		5.78965		136.506		6.07343		11.6065		0		3.09086		0		7.20846		10.1217
MET5-26 PW R3		met5-26 pw r3_bc5_01_54746.d.xms	1		0.802316		0.287365		0.484363		0.287367		0.00319536		0.138804		1.44869		3.41311		9.11986		0.839569		0.182911		0.30951		1.02033		0.608489		0.120244		5.35611		0.731649		0.791745		0		0.583905		0		0.829338		0.501471
MET5-26 PB R3		met5-26 pb r3_bc6_01_54747.d.xms	1		0.253204		0.221897		0.0589661		0.113534		0		0.186706		0.594388		0.752896		11.1412		0.179518		0.0517209		0.104101		0.228183		0.095864		0.0588367		0.436612		0.132305		0.362299		0		0.148261		0		1.16469		0.0798236
MET5-26 NW R3		met5-26 nw r3_bc7_01_54748.d.xms	1		0.245201		0.203527		0.0458598		0.117184		0		0.170516		0.22726		0.405842		4.09961		0.141237		0.0491672		0.0998101		0.143163		0.211479		0.0643937		0.365343		0.395953		0.448459		0.000599045		0.0217779		0		0.313025		0.113866
MET5-26 W R3		met5-26 w r3_bc8_01_54749.d.xms	1		0.0523821		0.0655887		0		0.0176672		0		0.232942		0.106999		0.189575		3.68593		0.0290826		0.0102101		0.0150025		0.0514247		0.0880481		0.0058657		0.271747		0.0542634		0.30518		0		0.0042454		0		0.0182759		0.0309747
MET5-26 L2 R4		met5-26 l2 r4_bd1_01_54752.d.xms	1		1.74778		1.19592		0.427934		1.72555		0		0		2.68935		11.4368		2.78631		2.79434		1.73591		2.75845		4.60245		7.13547		0.661164		21.3311		1.36758		2.1945		0		0.954049		0		0.549566		1.97288
MET5-26 EL3 R4		met5-26 el3 r4_bd2_01_54753.d.xms	1		0.482205		0.219211		0.0733143		0.330685		0		0.182238		0.238386		0.453072		4.21166		0.440545		0.133498		0.19215		0.182208		0.78532		0.121437		1.53206		1.35446		0.583423		0		0.0528096		0		0.147564		0.206131
MET5-26 LL3 R4		met5-26 ll3 r4_bd3_01_54754.d.xms	1		15.1518		7.34887		1.88501		5.19753		0.0162654		0		8.69753		57.0923		37.3752		11.8231		9.9767		14.9801		17.9718		76.6734		10.1907		149.69		9.63941		15.5716		0		3.7129		0		8.97806		15.3006
MET5-26 PW R4		met5-26 pw r4_bd4_01_54755.d.xms	1		0.648797		0.240301		0.398732		0.179451		0		0.166896		1.21629		3.06983		5.6793		0.682676		0.204408		0.306744		0.962073		0.571477		0.0889639		4.20957		0.456293		0.666132		0		0.298738		0		0.264738		0.531646
MET5-26 PB R4		met5-26 pb r4_bd5_01_54756.d.xms	1		0.111581		0.0823627		0		0.0485391		0		0.207809		0.173926		0.271279		2.85559		0.0612848		0.0169149		0.0318473		0.0789088		0		0.0199771		0.127191		0.0976664		0.279542		0		0.0532014		0		0.370574		0.0203951
MET5-26 NW R4		met5-26 nw r4_bd6_01_54757.d.xms	1		0.0623211		0.0728697		0.0204404		0.0302676		0		0.268554		0.118181		0.283414		1.85003		0.0234781		0.0158524		0.0367659		0.0945132		0.0910061		0.0164307		0.208789		0.0150573		0.273245		0		0.00772458		0		0.154412		0.0360897
MET5-26 W R4		met5-26 w r4_bd7_01_54758.d.xms	1		0.0778709		0.135864		0.0221618		0.0408161		0		0.192323		0.164317		0.303361		2.83317		0.064261		0.0362243		0.0492989		0.0950475		0.197285		0.0171478		0.514723		0.0387244		0.324188		0.00232702		0.018226		0.0119469		0.0285082		0.0626408
MET5-26 L2 R5		met5-26 l2 r5_bd8_01_54761.d.xms	1		0.544385		0.341417		0.205021		0.271141		0		0.0977437		1.01622		3.87794		2.82269		0.750036		0.418197		0.723325		1.50872		1.75135		0.218343		5.09274		0.550653		0.868279		0		0.225736		0		0.290069		0.617113
MET5-26 EL3 R5		met5-26 el3 r5_be1_01_54762.d.xms	1		4.271		4.34904		1.60713		2.47074		0.0064213		0		5.71577		31.8256		8.73837		5.84997		5.22877		7.05622		12.724		17.9812		2.79436		53.4877		3.73551		7.01629		0		2.11901		0		3.07273		6.68818
MET5-26 LL3 R5		met5-26 ll3 r5_be2_01_54763.d.xms	1		7.82303		6.58097		2.28653		3.76556		0.0291712		0		10.1586		33.5528		23.3631		10.9263		4.41645		7.59791		10.3244		40.8204		5.19017		139.078		4.28295		9.96986		0.000552684		2.9691		0		5.10022		8.19959
MET5-26 PW R5		met5-26 pw r5_be3_01_54764.d.xms	1		0.158912		0.0742629		0.0810471		0.0323724		0.00302938		0.209081		0.265775		0.641618		2.86097		0.221882		0.0217523		0.0486573		0.209369		0.126329		0.0217636		0.974927		0.0643296		0.41683		0		0.146056		0		0.393154		0.0938502
MET5-26 PB R5		met5-26 pb r5_be4_01_54765.d.xms	1		0.0681782		0.0548027		0		0.0315706		0		0.261533		0.113602		0.192865		3.08412		0.0371404		0.00276427		0.0056869		0.0524758		0		0.0100158		0.0878073		0.0718784		0.321452		0		0.0110681		0		0.220719		0.0243775
MET5-26 NW R5		met5-26 nw r5_be5_01_54766.d.xms	1		0.952805		0.855279		0.300007		0.406685		0		0.127829		1.61232		3.63526		4.24299		0.443243		0.307295		0.609962		1.25066		1.60974		0.340154		2.72155		0.360442		0.677031		0.00118203		0.13227		0		2.74098		0.731209
MET5-26 W R5		met5-26 w r5_be6_01_54767.d.xms	1		0.0697125		0.100247		0		0.0420795		0		0.239208		0.14894		0.275139		3.28937		0.0570553		0.00946353		0.00630431		0.0789325		0.115273		0.00126662		0.341464		0.0401797		0.327568		0.00162872		0.00348023		0.0191768		0.0100404		0.0250359
MET6-26 L2 R6		met6-26 l2 r6_be7_01_54770.d.xms	1		1.28535		1.79866		0.405302		0.545298		0		0		2.1869		12.5394		2.34848		2.22749		2.31103		2.78678		5.2945		6.64102		1.30219		12.4691		1.30697		1.79515		0		1.25242		0		1.45176		2.41312
MET6-26 EL3 R6		met6-26 el3 r6_be8_01_54771.d.xms	1		3.30726		3.87884		1.13457		1.72953		0.00186023		0		3.93505		19.3187		7.44003		4.5794		3.02918		4.96595		6.79142		12.9327		1.62029		25.1432		2.82387		3.8933		0		1.256		0		2.43756		4.28115
MET6-26 LL3 R6		met6-26 ll3 r6_ga1_01_54772.d.xms	1		5.26533		7.54395		2.71047		1.70747		0.0249062		0		9.08217		35.9026		15.3398		5.75485		2.43481		4.86829		10.8076		33.3782		3.85122		112.001		2.24803		7.66516		0		4.03258		0		11.6187		6.42164
MET6-26 PW R6		met6-26 pw r6_ga2_01_54773.d.xms	1		3.71067		1.21136		2.95967		1.05235		0.00163181		0		6.72511		16.8824		19.1123		5.72918		0.878018		1.41082		4.48216		4.09563		0.703972		25.7988		1.19646		2.33698		0		3.00816		0		9.20825		2.99347
MET6-26 PB R6		met6-26 pb r6_ga3_01_54774.d.xms	1		1.42457		0.624757		0.262977		0.638286		0		0		3.34883		4.82484		1.36858		1.06778		0.499151		0.789573		1.36773		0.538234		0.471844		2.40357		0.551159		0.518527		0		0.999343		0		8.8646		0.648148
MET6-26 NW R6		met6-26 nw r6_ga4_01_54775.d.xms	1		2.51122		1.6685		0.771476		1.22883		0		0		4.01735		7.99983		3.10789		1.28989		0.663172		1.35399		2.48875		3.46584		0.802136		7.33587		1.03459		1.08186		0.00214602		0.757317		0		9.12333		1.7598
MET6-26 W R6		met6-26 w r6_ga5_01_54776.d.xms	1		0.126463		0.176091		0		0.0584589		0		0.152149		0.317007		0.586343		3.47643		0.112041		0.0243549		0.0268385		0.175215		0.247408		0.00322467		0.843877		0.0966841		0.282233		0.00702645		0.00651627		0.0426418		0.0512846		0.0708069
MET6-26 L2 R7		met6-26 l2 r7_ga6_01_54779.d.xms	1		3.17887		3.18338		1.21504		0.564881		0.00275276		0		4.72146		14.8055		5.88157		3.60702		2.39454		3.91678		5.02521		8.47145		1.25151		18.4027		1.8493		2.66093		0		1.35383		0		2.2074		3.15896
MET6-26 EL3 R7		met6-26 el3 r7_ga7_01_54780.d.xms	1		4.17608		4.06547		1.30641		1.71783		0.00266736		0		4.3121		25.5815		6.83785		8.34318		4.44843		6.28521		9.30966		20.7868		2.1498		43.0113		3.3676		5.51044		0.00133958		2.46747		0		2.55524		5.44258
MET6-26 LL3 R7		met6-26 ll3 r7_ga8_01_54781.d.xms	1		17.4304		10.812		6.04929		6.06037		0.0179943		0		11.505		94.1603		59.666		18.3393		11.608		19.3086		28.7505		87.2653		11.3166		169.054		17.1995		20.2266		0		6.25054		0		13.3737		19.3943
MET6-26 PW R7		met6-26 pw r7_gb1_01_54782.d.xms	1		3.55517		1.10533		2.191		0.619712		0		0.0146026		5.7144		14.1721		20.1953		5.17968		0.692144		1.1803		3.85859		4.45916		0.561815		20.9774		1.20144		2.21987		0.00129148		3.10682		0		9.34201		2.78492
MET6-26 PB R7		met6-26 pb r7_gb2_01_54783.d.xms	1		1.48595		0.760873		0.197443		0.619508		0		0.0179877		3.85723		5.05664		2.81921		1.20411		0.604163		1.27999		1.23212		1.09502		0.717174		2.68679		0.919325		0.801451		0		2.12061		0		17.667		1.18671
MET6-26 NW R7		met6-26 nw r7_gb3_01_54784.d.xms	1		2.87259		2.18983		0.83518		1.25687		0.004606		0		4.80452		9.42938		2.98177		1.49949		0.900092		1.6514		2.85658		4.15901		1.47769		8.14367		1.4043		1.29365		0.00301765		1.24232		0		14.4897		2.33735
MET6-26 W R7		met6-26 w r7_gb4_01_54785.d.xms	1		1.50927		1.16674		0.132725		0.817979		0		0.00930727		2.24882		3.27683		0		1.03379		0.279039		0.284566		1.00251		2.97988		0.0836585		5.42959		0.651811		0.580887		0.0486021		0.0648149		0.313824		0.346795		0.587615
MET6-26 L2 R8		met6-26 l2 r8_gb5_01_54788.d.xms	1		1.52593		1.71		0.618176		0.794826		0		0.0103284		2.16462		9.95132		2.57444		2.41182		1.28361		2.39778		3.41673		6.15953		0.854369		12.1935		0.9314		1.64449		0		0.764961		0		1.25199		1.61111
MET6-26 EL3 R8		met6-26 el3 r8_gb6_01_54789.d.xms	1		3.39342		3.59034		1.1954		1.71919		0		0.0186858		4.12986		26.7481		10.8217		5.80125		3.90008		6.10078		9.51988		14.6106		2.25925		33.7001		3.18201		4.98517		0		1.91719		0		3.36851		5.11756
MET6-26 LL3 R8		met6-26 ll3 r8_gb7_01_54790.d.xms	1		27.5439		18.2839		5.07579		7.75394		0.0789488		0		18.8048		104.881		46.5454		23.7339		11.7589		21.6031		29.9887		94.7352		14.1613		245.066		2.76623		24.89		0		11.1625		0		13.5369		19.1526
MET6-26 PW R8		met6-26 pw r8_gb8_01_54791.d.xms	1		3.16812		0.756928		2.16981		0.724828		0		0.0145848		5.59453		14.4165		17.64		3.79759		0.763228		1.27689		3.96051		3.39093		0.552479		22.4497		1.15057		2.14036		0		2.9038		0		5.05119		2.25392
MET6-26 PB R8		met6-26 pb r8_gc1_01_54792.d.xms	1		1.46046		0.778431		0.229182		0.719069		0		0.0167343		3.68848		4.4513		2.23636		1.32229		0.385195		0.911194		1.21906		0.913026		0.558461		2.92784		0.769933		0.824978		0		1.82806		0		14.9335		1.1207
MET6-26 NW R8		met6-26 nw r8_gc2_01_54793.d.xms	1		0.0703141		0.0752861		0		0.0358862		0.00194418		0.193425		0.130264		0.321657		3.11187		0.0639215		0.00685857		0.0283468		0.104429		0.0543612		0.0173927		0.248346		0.0999391		0.289694		0		0.0277386		0		0.483072		0.0592594
MET6-26 W R8		met6-26 w r8_gc3_01_54794.d.xms	1		1.47056		1.2798		0		0.668253		0.00253857		0		2.54817		3.42825		1.45703		0.944966		0.226832		0.14313		1.09452		3.02688		0.036075		6.48892		0.633078		0.630154		0.0257513		0.0442781		0.31143		0.720441		0.521338
MET1-26 L2 R9		met1-26 l2 r9_gc4_01_54797.d.xms	1		0.275166		0.694019		0.187811		0.16932		0		0.184156		0.740942		3.10184		3.23925		0.617282		0.417336		0.663964		1.28069		1.39797		0.167596		3.40306		0.158536		0.773265		0		0.158914		0		0.367846		0.534775
MET1-26 EL3 R9		met1-26 el3 r9_gc5_01_54798.d.xms	1		3.97699		4.59425		1.99659		2.77819		0.0215404		0.00889857		5.26591		28.0521		7.31267		6.71892		3.49082		5.94947		10.0666		16.2657		1.88178		38.061		1.6465		5.12082		0		1.55905		0		1.75498		4.16433
MET1-26 LL3 R9		met1-26 ll3 r9_gc6_01_54799.d.xms	1		0.388746		0.56644		0.174312		0.115271		0.00468864		0.196378		0.40721		2.08083		3.37202		0.546942		0.32163		0.605151		0.754335		2.70133		0.278278		4.47189		0.499581		0.789172		0		0.120375		0		0.426608		0.541595
MET1-26 PW R9		met1-26 pw r9_gc7_01_54800.d.xms	1		0.446221		0.212644		0.368481		0.152344		0.00526167		0.217154		1.14799		2.97089		5.71338		0.853053		0.131556		0.212665		0.948798		0.645189		0.0881592		4.33904		0.269823		0.64728		0		0.227139		0		0.857675		0.432308
MET1-26 PB R9		met1-26 pb r9_gc8_01_54801.d.xms	1		0.0467441		0.0272373		0		0.0211854		0		0.230769		0.110968		0.155094		1.83088		0.0205047		0.00267107		0.0139996		0.0295774		0.01614		0.00898116		0.0872138		0.022482		0.240271		0		0.0271247		0		0.298645		0.00853124
MET1-26 NW R9		met1-26 nw r9_gd1_01_54802.d.xms	1		0.075531		0.0746975		0.0240616		0.0366226		0		0.227186		0.163173		0.296736		2.38781		0.0495595		0.0150374		0.041094		0.100282		0.107052		0.025599		0.235439		0.0427844		0.278564		0		0.0220135		0		0.2939		0.0515203
MET1-26 W R9		met1-26 w r9_gd2_01_54803.d.xms	1		0.241004		0.277305		0		0.185041		0		0.121242		0.543217		0.981708		2.51312		0.280763		0.0395768		0.00630376		0.361201		0.75063		0.0107227		1.77888		0.154454		0.234098		0.0103986		0.00605459		0.115406		0.0335093		0.067887
					NA		NA		NA		NA		NA		NA		NA		NA		NA		NA		NA		NA		NA		NA		NA		NA		NA		NA		NA		NA		NA		NA		NA
					NA		NA		NA		NA		NA		NA		NA		NA		NA		NA		NA		NA		NA		NA		NA		NA		NA		NA		NA		NA		NA		NA		NA
					NA		NA		NA		NA		NA		NA		NA		NA		NA		NA		NA		NA		NA		NA		NA		NA		NA		NA		NA		NA		NA		NA		NA
					NA		NA		NA		NA		NA		NA		NA		NA		NA		NA		NA		NA		NA		NA		NA		NA		NA		NA		NA		NA		NA		NA		NA
					NA		NA		NA		NA		NA		NA		NA		NA		NA		NA		NA		NA		NA		NA		NA		NA		NA		NA		NA		NA		NA		NA		NA
					NA		NA		NA		NA		NA		NA		NA		NA		NA		NA		NA		NA		NA		NA		NA		NA		NA		NA		NA		NA		NA		NA		NA
					NA		NA		NA		NA		NA		NA		NA		NA		NA		NA		NA		NA		NA		NA		NA		NA		NA		NA		NA		NA		NA		NA		NA
					NA		NA		NA		NA		NA		NA		NA		NA		NA		NA		NA		NA		NA		NA		NA		NA		NA		NA		NA		NA		NA		NA		NA
					NA		NA		NA		NA		NA		NA		NA		NA		NA		NA		NA		NA		NA		NA		NA		NA		NA		NA		NA		NA		NA		NA		NA
					NA		NA		NA		NA		NA		NA		NA		NA		NA		NA		NA		NA		NA		NA		NA		NA		NA		NA		NA		NA		NA		NA		NA
					NA		NA		NA		NA		NA		NA		NA		NA		NA		NA		NA		NA		NA		NA		NA		NA		NA		NA		NA		NA		NA		NA		NA
					NA		NA		NA		NA		NA		NA		NA		NA		NA		NA		NA		NA		NA		NA		NA		NA		NA		NA		NA		NA		NA		NA		NA
					NA		NA		NA		NA		NA		NA		NA		NA		NA		NA		NA		NA		NA		NA		NA		NA		NA		NA		NA		NA		NA		NA		NA
					NA		NA		NA		NA		NA		NA		NA		NA		NA		NA		NA		NA		NA		NA		NA		NA		NA		NA		NA		NA		NA		NA		NA
					NA		NA		NA		NA		NA		NA		NA		NA		NA		NA		NA		NA		NA		NA		NA		NA		NA		NA		NA		NA		NA		NA		NA
					NA		NA		NA		NA		NA		NA		NA		NA		NA		NA		NA		NA		NA		NA		NA		NA		NA		NA		NA		NA		NA		NA		NA
					NA		NA		NA		NA		NA		NA		NA		NA		NA		NA		NA		NA		NA		NA		NA		NA		NA		NA		NA		NA		NA		NA		NA
					NA		NA		NA		NA		NA		NA		NA		NA		NA		NA		NA		NA		NA		NA		NA		NA		NA		NA		NA		NA		NA		NA		NA
					NA		NA		NA		NA		NA		NA		NA		NA		NA		NA		NA		NA		NA		NA		NA		NA		NA		NA		NA		NA		NA		NA		NA
					NA		NA		NA		NA		NA		NA		NA		NA		NA		NA		NA		NA		NA		NA		NA		NA		NA		NA		NA		NA		NA		NA		NA
					NA		NA		NA		NA		NA		NA		NA		NA		NA		NA		NA		NA		NA		NA		NA		NA		NA		NA		NA		NA		NA		NA		NA
					NA		NA		NA		NA		NA		NA		NA		NA		NA		NA		NA		NA		NA		NA		NA		NA		NA		NA		NA		NA		NA		NA		NA
					NA		NA		NA		NA		NA		NA		NA		NA		NA		NA		NA		NA		NA		NA		NA		NA		NA		NA		NA		NA		NA		NA		NA
					NA		NA		NA		NA		NA		NA		NA		NA		NA		NA		NA		NA		NA		NA		NA		NA		NA		NA		NA		NA		NA		NA		NA
					NA		NA		NA		NA		NA		NA		NA		NA		NA		NA		NA		NA		NA		NA		NA		NA		NA		NA		NA		NA		NA		NA		NA
					NA		NA		NA		NA		NA		NA		NA		NA		NA		NA		NA		NA		NA		NA		NA		NA		NA		NA		NA		NA		NA		NA		NA
					NA		NA		NA		NA		NA		NA		NA		NA		NA		NA		NA		NA		NA		NA		NA		NA		NA		NA		NA		NA		NA		NA		NA
					NA		NA		NA		NA		NA		NA		NA		NA		NA		NA		NA		NA		NA		NA		NA		NA		NA		NA		NA		NA		NA		NA		NA
					NA		NA		NA		NA		NA		NA		NA		NA		NA		NA		NA		NA		NA		NA		NA		NA		NA		NA		NA		NA		NA		NA		NA
					NA		NA		NA		NA		NA		NA		NA		NA		NA		NA		NA		NA		NA		NA		NA		NA		NA		NA		NA		NA		NA		NA		NA
					NA		NA		NA		NA		NA		NA		NA		NA		NA		NA		NA		NA		NA		NA		NA		NA		NA		NA		NA		NA		NA		NA		NA
					NA		NA		NA		NA		NA		NA		NA		NA		NA		NA		NA		NA		NA		NA		NA		NA		NA		NA		NA		NA		NA		NA		NA
					NA		NA		NA		NA		NA		NA		NA		NA		NA		NA		NA		NA		NA		NA		NA		NA		NA		NA		NA		NA		NA		NA		NA
					NA		NA		NA		NA		NA		NA		NA		NA		NA		NA		NA		NA		NA		NA		NA		NA		NA		NA		NA		NA		NA		NA		NA
					NA		NA		NA		NA		NA		NA		NA		NA		NA		NA		NA		NA		NA		NA		NA		NA		NA		NA		NA		NA		NA		NA		NA
					NA		NA		NA		NA		NA		NA		NA		NA		NA		NA		NA		NA		NA		NA		NA		NA		NA		NA		NA		NA		NA		NA		NA
					NA		NA		NA		NA		NA		NA		NA		NA		NA		NA		NA		NA		NA		NA		NA		NA		NA		NA		NA		NA		NA		NA		NA
					NA		NA		NA		NA		NA		NA		NA		NA		NA		NA		NA		NA		NA		NA		NA		NA		NA		NA		NA		NA		NA		NA		NA
					NA		NA		NA		NA		NA		NA		NA		NA		NA		NA		NA		NA		NA		NA		NA		NA		NA		NA		NA		NA		NA		NA		NA
					NA		NA		NA		NA		NA		NA		NA		NA		NA		NA		NA		NA		NA		NA		NA		NA		NA		NA		NA		NA		NA		NA		NA
					NA		NA		NA		NA		NA		NA		NA		NA		NA		NA		NA		NA		NA		NA		NA		NA		NA		NA		NA		NA		NA		NA		NA
					NA		NA		NA		NA		NA		NA		NA		NA		NA		NA		NA		NA		NA		NA		NA		NA		NA		NA		NA		NA		NA		NA		NA
					NA		NA		NA		NA		NA		NA		NA		NA		NA		NA		NA		NA		NA		NA		NA		NA		NA		NA		NA		NA		NA		NA		NA
					NA		NA		NA		NA		NA		NA		NA		NA		NA		NA		NA		NA		NA		NA		NA		NA		NA		NA		NA		NA		NA		NA		NA
					NA		NA		NA		NA		NA		NA		NA		NA		NA		NA		NA		NA		NA		NA		NA		NA		NA		NA		NA		NA		NA		NA		NA
					NA		NA		NA		NA		NA		NA		NA		NA		NA		NA		NA		NA		NA		NA		NA		NA		NA		NA		NA		NA		NA		NA		NA
					NA		NA		NA		NA		NA		NA		NA		NA		NA		NA		NA		NA		NA		NA		NA		NA		NA		NA		NA		NA		NA		NA		NA
					NA		NA		NA		NA		NA		NA		NA		NA		NA		NA		NA		NA		NA		NA		NA		NA		NA		NA		NA		NA		NA		NA		NA
					NA		NA		NA		NA		NA		NA		NA		NA		NA		NA		NA		NA		NA		NA		NA		NA		NA		NA		NA		NA		NA		NA		NA
					NA		NA		NA		NA		NA		NA		NA		NA		NA		NA		NA		NA		NA		NA		NA		NA		NA		NA		NA		NA		NA		NA		NA
					NA		NA		NA		NA		NA		NA		NA		NA		NA		NA		NA		NA		NA		NA		NA		NA		NA		NA		NA		NA		NA		NA		NA
					NA		NA		NA		NA		NA		NA		NA		NA		NA		NA		NA		NA		NA		NA		NA		NA		NA		NA		NA		NA		NA		NA		NA
					NA		NA		NA		NA		NA		NA		NA		NA		NA		NA		NA		NA		NA		NA		NA		NA		NA		NA		NA		NA		NA		NA		NA
					NA		NA		NA		NA		NA		NA		NA		NA		NA		NA		NA		NA		NA		NA		NA		NA		NA		NA		NA		NA		NA		NA		NA
					NA		NA		NA		NA		NA		NA		NA		NA		NA		NA		NA		NA		NA		NA		NA		NA		NA		NA		NA		NA		NA		NA		NA
					NA		NA		NA		NA		NA		NA		NA		NA		NA		NA		NA		NA		NA		NA		NA		NA		NA		NA		NA		NA		NA		NA		NA
					NA		NA		NA		NA		NA		NA		NA		NA		NA		NA		NA		NA		NA		NA		NA		NA		NA		NA		NA		NA		NA		NA		NA
					NA		NA		NA		NA		NA		NA		NA		NA		NA		NA		NA		NA		NA		NA		NA		NA		NA		NA		NA		NA		NA		NA		NA
					NA		NA		NA		NA		NA		NA		NA		NA		NA		NA		NA		NA		NA		NA		NA		NA		NA		NA		NA		NA		NA		NA		NA
					NA		NA		NA		NA		NA		NA		NA		NA		NA		NA		NA		NA		NA		NA		NA		NA		NA		NA		NA		NA		NA		NA		NA
					NA		NA		NA		NA		NA		NA		NA		NA		NA		NA		NA		NA		NA		NA		NA		NA		NA		NA		NA		NA		NA		NA		NA
					NA		NA		NA		NA		NA		NA		NA		NA		NA		NA		NA		NA		NA		NA		NA		NA		NA		NA		NA		NA		NA		NA		NA
					NA		NA		NA		NA		NA		NA		NA		NA		NA		NA		NA		NA		NA		NA		NA		NA		NA		NA		NA		NA		NA		NA		NA
					NA		NA		NA		NA		NA		NA		NA		NA		NA		NA		NA		NA		NA		NA		NA		NA		NA		NA		NA		NA		NA		NA		NA
					NA		NA		NA		NA		NA		NA		NA		NA		NA		NA		NA		NA		NA		NA		NA		NA		NA		NA		NA		NA		NA		NA		NA
					NA		NA		NA		NA		NA		NA		NA		NA		NA		NA		NA		NA		NA		NA		NA		NA		NA		NA		NA		NA		NA		NA		NA
					NA		NA		NA		NA		NA		NA		NA		NA		NA		NA		NA		NA		NA		NA		NA		NA		NA		NA		NA		NA		NA		NA		NA
					NA		NA		NA		NA		NA		NA		NA		NA		NA		NA		NA		NA		NA		NA		NA		NA		NA		NA		NA		NA		NA		NA		NA
					NA		NA		NA		NA		NA		NA		NA		NA		NA		NA		NA		NA		NA		NA		NA		NA		NA		NA		NA		NA		NA		NA		NA
					NA		NA		NA		NA		NA		NA		NA		NA		NA		NA		NA		NA		NA		NA		NA		NA		NA		NA		NA		NA		NA		NA		NA
					NA		NA		NA		NA		NA		NA		NA		NA		NA		NA		NA		NA		NA		NA		NA		NA		NA		NA		NA		NA		NA		NA		NA
					NA		NA		NA		NA		NA		NA		NA		NA		NA		NA		NA		NA		NA		NA		NA		NA		NA		NA		NA		NA		NA		NA		NA
					NA		NA		NA		NA		NA		NA		NA		NA		NA		NA		NA		NA		NA		NA		NA		NA		NA		NA		NA		NA		NA		NA		NA
					NA		NA		NA		NA		NA		NA		NA		NA		NA		NA		NA		NA		NA		NA		NA		NA		NA		NA		NA		NA		NA		NA		NA
					NA		NA		NA		NA		NA		NA		NA		NA		NA		NA		NA		NA		NA		NA		NA		NA		NA		NA		NA		NA		NA		NA		NA
					NA		NA		NA		NA		NA		NA		NA		NA		NA		NA		NA		NA		NA		NA		NA		NA		NA		NA		NA		NA		NA		NA		NA
					NA		NA		NA		NA		NA		NA		NA		NA		NA		NA		NA		NA		NA		NA		NA		NA		NA		NA		NA		NA		NA		NA		NA
					NA		NA		NA		NA		NA		NA		NA		NA		NA		NA		NA		NA		NA		NA		NA		NA		NA		NA		NA		NA		NA		NA		NA
					NA		NA		NA		NA		NA		NA		NA		NA		NA		NA		NA		NA		NA		NA		NA		NA		NA		NA		NA		NA		NA		NA		NA
					NA		NA		NA		NA		NA		NA		NA		NA		NA		NA		NA		NA		NA		NA		NA		NA		NA		NA		NA		NA		NA		NA		NA
					NA		NA		NA		NA		NA		NA		NA		NA		NA		NA		NA		NA		NA		NA		NA		NA		NA		NA		NA		NA		NA		NA		NA
					NA		NA		NA		NA		NA		NA		NA		NA		NA		NA		NA		NA		NA		NA		NA		NA		NA		NA		NA		NA		NA		NA		NA
					NA		NA		NA		NA		NA		NA		NA		NA		NA		NA		NA		NA		NA		NA		NA		NA		NA		NA		NA		NA		NA		NA		NA
					NA		NA		NA		NA		NA		NA		NA		NA		NA		NA		NA		NA		NA		NA		NA		NA		NA		NA		NA		NA		NA		NA		NA
					NA		NA		NA		NA		NA		NA		NA		NA		NA		NA		NA		NA		NA		NA		NA		NA		NA		NA		NA		NA		NA		NA		NA
					NA		NA		NA		NA		NA		NA		NA		NA		NA		NA		NA		NA		NA		NA		NA		NA		NA		NA		NA		NA		NA		NA		NA
					NA		NA		NA		NA		NA		NA		NA		NA		NA		NA		NA		NA		NA		NA		NA		NA		NA		NA		NA		NA		NA		NA		NA
					NA		NA		NA		NA		NA		NA		NA		NA		NA		NA		NA		NA		NA		NA		NA		NA		NA		NA		NA		NA		NA		NA		NA
					NA		NA		NA		NA		NA		NA		NA		NA		NA		NA		NA		NA		NA		NA		NA		NA		NA		NA		NA		NA		NA		NA		NA
					NA		NA		NA		NA		NA		NA		NA		NA		NA		NA		NA		NA		NA		NA		NA		NA		NA		NA		NA		NA		NA		NA		NA
					NA		NA		NA		NA		NA		NA		NA		NA		NA		NA		NA		NA		NA		NA		NA		NA		NA		NA		NA		NA		NA		NA		NA
					NA		NA		NA		NA		NA		NA		NA		NA		NA		NA		NA		NA		NA		NA		NA		NA		NA		NA		NA		NA		NA		NA		NA
					NA		NA		NA		NA		NA		NA		NA		NA		NA		NA		NA		NA		NA		NA		NA		NA		NA		NA		NA		NA		NA		NA		NA
					NA		NA		NA		NA		NA		NA		NA		NA		NA		NA		NA		NA		NA		NA		NA		NA		NA		NA		NA		NA		NA		NA		NA
					NA		NA		NA		NA		NA		NA		NA		NA		NA		NA		NA		NA		NA		NA		NA		NA		NA		NA		NA		NA		NA		NA		NA
					NA		NA		NA		NA		NA		NA		NA		NA		NA		NA		NA		NA		NA		NA		NA		NA		NA		NA		NA		NA		NA		NA		NA
					NA		NA		NA		NA		NA		NA		NA		NA		NA		NA		NA		NA		NA		NA		NA		NA		NA		NA		NA		NA		NA		NA		NA
					NA		NA		NA		NA		NA		NA		NA		NA		NA		NA		NA		NA		NA		NA		NA		NA		NA		NA		NA		NA		NA		NA		NA
					NA		NA		NA		NA		NA		NA		NA		NA		NA		NA		NA		NA		NA		NA		NA		NA		NA		NA		NA		NA		NA		NA		NA
					NA		NA		NA		NA		NA		NA		NA		NA		NA		NA		NA		NA		NA		NA		NA		NA		NA		NA		NA		NA		NA		NA		NA
					NA		NA		NA		NA		NA		NA		NA		NA		NA		NA		NA		NA		NA		NA		NA		NA		NA		NA		NA		NA		NA		NA		NA
					NA		NA		NA		NA		NA		NA		NA		NA		NA		NA		NA		NA		NA		NA		NA		NA		NA		NA		NA		NA		NA		NA		NA
					NA		NA		NA		NA		NA		NA		NA		NA		NA		NA		NA		NA		NA		NA		NA		NA		NA		NA		NA		NA		NA		NA		NA
					NA		NA		NA		NA		NA		NA		NA		NA		NA		NA		NA		NA		NA		NA		NA		NA		NA		NA		NA		NA		NA		NA		NA
					NA		NA		NA		NA		NA		NA		NA		NA		NA		NA		NA		NA		NA		NA		NA		NA		NA		NA		NA		NA		NA		NA		NA
					NA		NA		NA		NA		NA		NA		NA		NA		NA		NA		NA		NA		NA		NA		NA		NA		NA		NA		NA		NA		NA		NA		NA
					NA		NA		NA		NA		NA		NA		NA		NA		NA		NA		NA		NA		NA		NA		NA		NA		NA		NA		NA		NA		NA		NA		NA
					NA		NA		NA		NA		NA		NA		NA		NA		NA		NA		NA		NA		NA		NA		NA		NA		NA		NA		NA		NA		NA		NA		NA
					NA		NA		NA		NA		NA		NA		NA		NA		NA		NA		NA		NA		NA		NA		NA		NA		NA		NA		NA		NA		NA		NA		NA
					NA		NA		NA		NA		NA		NA		NA		NA		NA		NA		NA		NA		NA		NA		NA		NA		NA		NA		NA		NA		NA		NA		NA
					NA		NA		NA		NA		NA		NA		NA		NA		NA		NA		NA		NA		NA		NA		NA		NA		NA		NA		NA		NA		NA		NA		NA
					NA		NA		NA		NA		NA		NA		NA		NA		NA		NA		NA		NA		NA		NA		NA		NA		NA		NA		NA		NA		NA		NA		NA
					NA		NA		NA		NA		NA		NA		NA		NA		NA		NA		NA		NA		NA		NA		NA		NA		NA		NA		NA		NA		NA		NA		NA
					NA		NA		NA		NA		NA		NA		NA		NA		NA		NA		NA		NA		NA		NA		NA		NA		NA		NA		NA		NA		NA		NA		NA
					NA		NA		NA		NA		NA		NA		NA		NA		NA		NA		NA		NA		NA		NA		NA		NA		NA		NA		NA		NA		NA		NA		NA
					NA		NA		NA		NA		NA		NA		NA		NA		NA		NA		NA		NA		NA		NA		NA		NA		NA		NA		NA		NA		NA		NA		NA
					NA		NA		NA		NA		NA		NA		NA		NA		NA		NA		NA		NA		NA		NA		NA		NA		NA		NA		NA		NA		NA		NA		NA
					NA		NA		NA		NA		NA		NA		NA		NA		NA		NA		NA		NA		NA		NA		NA		NA		NA		NA		NA		NA		NA		NA		NA
					NA		NA		NA		NA		NA		NA		NA		NA		NA		NA		NA		NA		NA		NA		NA		NA		NA		NA		NA		NA		NA		NA		NA
					NA		NA		NA		NA		NA		NA		NA		NA		NA		NA		NA		NA		NA		NA		NA		NA		NA		NA		NA		NA		NA		NA		NA
					NA		NA		NA		NA		NA		NA		NA		NA		NA		NA		NA		NA		NA		NA		NA		NA		NA		NA		NA		NA		NA		NA		NA
					NA		NA		NA		NA		NA		NA		NA		NA		NA		NA		NA		NA		NA		NA		NA		NA		NA		NA		NA		NA		NA		NA		NA
					NA		NA		NA		NA		NA		NA		NA		NA		NA		NA		NA		NA		NA		NA		NA		NA		NA		NA		NA		NA		NA		NA		NA
					NA		NA		NA		NA		NA		NA		NA		NA		NA		NA		NA		NA		NA		NA		NA		NA		NA		NA		NA		NA		NA		NA		NA
					NA		NA		NA		NA		NA		NA		NA		NA		NA		NA		NA		NA		NA		NA		NA		NA		NA		NA		NA		NA		NA		NA		NA
					NA		NA		NA		NA		NA		NA		NA		NA		NA		NA		NA		NA		NA		NA		NA		NA		NA		NA		NA		NA		NA		NA		NA
					NA		NA		NA		NA		NA		NA		NA		NA		NA		NA		NA		NA		NA		NA		NA		NA		NA		NA		NA		NA		NA		NA		NA
					NA		NA		NA		NA		NA		NA		NA		NA		NA		NA		NA		NA		NA		NA		NA		NA		NA		NA		NA		NA		NA		NA		NA
					NA		NA		NA		NA		NA		NA		NA		NA		NA		NA		NA		NA		NA		NA		NA		NA		NA		NA		NA		NA		NA		NA		NA
					NA		NA		NA		NA		NA		NA		NA		NA		NA		NA		NA		NA		NA		NA		NA		NA		NA		NA		NA		NA		NA		NA		NA
					NA		NA		NA		NA		NA		NA		NA		NA		NA		NA		NA		NA		NA		NA		NA		NA		NA		NA		NA		NA		NA		NA		NA
					NA		NA		NA		NA		NA		NA		NA		NA		NA		NA		NA		NA		NA		NA		NA		NA		NA		NA		NA		NA		NA		NA		NA
					NA		NA		NA		NA		NA		NA		NA		NA		NA		NA		NA		NA		NA		NA		NA		NA		NA		NA		NA		NA		NA		NA		NA
					NA		NA		NA		NA		NA		NA		NA		NA		NA		NA		NA		NA		NA		NA		NA		NA		NA		NA		NA		NA		NA		NA		NA
					NA		NA		NA		NA		NA		NA		NA		NA		NA		NA		NA		NA		NA		NA		NA		NA		NA		NA		NA		NA		NA		NA		NA
					NA		NA		NA		NA		NA		NA		NA		NA		NA		NA		NA		NA		NA		NA		NA		NA		NA		NA		NA		NA		NA		NA		NA
					NA		NA		NA		NA		NA		NA		NA		NA		NA		NA		NA		NA		NA		NA		NA		NA		NA		NA		NA		NA		NA		NA		NA
					NA		NA		NA		NA		NA		NA		NA		NA		NA		NA		NA		NA		NA		NA		NA		NA		NA		NA		NA		NA		NA		NA		NA
					NA		NA		NA		NA		NA		NA		NA		NA		NA		NA		NA		NA		NA		NA		NA		NA		NA		NA		NA		NA		NA		NA		NA
					NA		NA		NA		NA		NA		NA		NA		NA		NA		NA		NA		NA		NA		NA		NA		NA		NA		NA		NA		NA		NA		NA		NA
					NA		NA		NA		NA		NA		NA		NA		NA		NA		NA		NA		NA		NA		NA		NA		NA		NA		NA		NA		NA		NA		NA		NA
					NA		NA		NA		NA		NA		NA		NA		NA		NA		NA		NA		NA		NA		NA		NA		NA		NA		NA		NA		NA		NA		NA		NA
					NA		NA		NA		NA		NA		NA		NA		NA		NA		NA		NA		NA		NA		NA		NA		NA		NA		NA		NA		NA		NA		NA		NA
					NA		NA		NA		NA		NA		NA		NA		NA		NA		NA		NA		NA		NA		NA		NA		NA		NA		NA		NA		NA		NA		NA		NA
					NA		NA		NA		NA		NA		NA		NA		NA		NA		NA		NA		NA		NA		NA		NA		NA		NA		NA		NA		NA		NA		NA		NA
					NA		NA		NA		NA		NA		NA		NA		NA		NA		NA		NA		NA		NA		NA		NA		NA		NA		NA		NA		NA		NA		NA		NA
					NA		NA		NA		NA		NA		NA		NA		NA		NA		NA		NA		NA		NA		NA		NA		NA		NA		NA		NA		NA		NA		NA		NA
					NA		NA		NA		NA		NA		NA		NA		NA		NA		NA		NA		NA		NA		NA		NA		NA		NA		NA		NA		NA		NA		NA		NA
					NA		NA		NA		NA		NA		NA		NA		NA		NA		NA		NA		NA		NA		NA		NA		NA		NA		NA		NA		NA		NA		NA		NA
					NA		NA		NA		NA		NA		NA		NA		NA		NA		NA		NA		NA		NA		NA		NA		NA		NA		NA		NA		NA		NA		NA		NA
					NA		NA		NA		NA		NA		NA		NA		NA		NA		NA		NA		NA		NA		NA		NA		NA		NA		NA		NA		NA		NA		NA		NA
					NA		NA		NA		NA		NA		NA		NA		NA		NA		NA		NA		NA		NA		NA		NA		NA		NA		NA		NA		NA		NA		NA		NA
					NA		NA		NA		NA		NA		NA		NA		NA		NA		NA		NA		NA		NA		NA		NA		NA		NA		NA		NA		NA		NA		NA		NA
					NA		NA		NA		NA		NA		NA		NA		NA		NA		NA		NA		NA		NA		NA		NA		NA		NA		NA		NA		NA		NA		NA		NA
					NA		NA		NA		NA		NA		NA		NA		NA		NA		NA		NA		NA		NA		NA		NA		NA		NA		NA		NA		NA		NA		NA		NA
					NA		NA		NA		NA		NA		NA		NA		NA		NA		NA		NA		NA		NA		NA		NA		NA		NA		NA		NA		NA		NA		NA		NA
					NA		NA		NA		NA		NA		NA		NA		NA		NA		NA		NA		NA		NA		NA		NA		NA		NA		NA		NA		NA		NA		NA		NA
					NA		NA		NA		NA		NA		NA		NA		NA		NA		NA		NA		NA		NA		NA		NA		NA		NA		NA		NA		NA		NA		NA		NA
					NA		NA		NA		NA		NA		NA		NA		NA		NA		NA		NA		NA		NA		NA		NA		NA		NA		NA		NA		NA		NA		NA		NA
					NA		NA		NA		NA		NA		NA		NA		NA		NA		NA		NA		NA		NA		NA		NA		NA		NA		NA		NA		NA		NA		NA		NA
					NA		NA		NA		NA		NA		NA		NA		NA		NA		NA		NA		NA		NA		NA		NA		NA		NA		NA		NA		NA		NA		NA		NA
					NA		NA		NA		NA		NA		NA		NA		NA		NA		NA		NA		NA		NA		NA		NA		NA		NA		NA		NA		NA		NA		NA		NA
					NA		NA		NA		NA		NA		NA		NA		NA		NA		NA		NA		NA		NA		NA		NA		NA		NA		NA		NA		NA		NA		NA		NA
					NA		NA		NA		NA		NA		NA		NA		NA		NA		NA		NA		NA		NA		NA		NA		NA		NA		NA		NA		NA		NA		NA		NA
					NA		NA		NA		NA		NA		NA		NA		NA		NA		NA		NA		NA		NA		NA		NA		NA		NA		NA		NA		NA		NA		NA		NA
					NA		NA		NA		NA		NA		NA		NA		NA		NA		NA		NA		NA		NA		NA		NA		NA		NA		NA		NA		NA		NA		NA		NA
					NA		NA		NA		NA		NA		NA		NA		NA		NA		NA		NA		NA		NA		NA		NA		NA		NA		NA		NA		NA		NA		NA		NA
					NA		NA		NA		NA		NA		NA		NA		NA		NA		NA		NA		NA		NA		NA		NA		NA		NA		NA		NA		NA		NA		NA		NA
					NA		NA		NA		NA		NA		NA		NA		NA		NA		NA		NA		NA		NA		NA		NA		NA		NA		NA		NA		NA		NA		NA		NA
					NA		NA		NA		NA		NA		NA		NA		NA		NA		NA		NA		NA		NA		NA		NA		NA		NA		NA		NA		NA		NA		NA		NA
					NA		NA		NA		NA		NA		NA		NA		NA		NA		NA		NA		NA		NA		NA		NA		NA		NA		NA		NA		NA		NA		NA		NA
					NA		NA		NA		NA		NA		NA		NA		NA		NA		NA		NA		NA		NA		NA		NA		NA		NA		NA		NA		NA		NA		NA		NA
					NA		NA		NA		NA		NA		NA		NA		NA		NA		NA		NA		NA		NA		NA		NA		NA		NA		NA		NA		NA		NA		NA		NA
					NA		NA		NA		NA		NA		NA		NA		NA		NA		NA		NA		NA		NA		NA		NA		NA		NA		NA		NA		NA		NA		NA		NA
					NA		NA		NA		NA		NA		NA		NA		NA		NA		NA		NA		NA		NA		NA		NA		NA		NA		NA		NA		NA		NA		NA		NA
					NA		NA		NA		NA		NA		NA		NA		NA		NA		NA		NA		NA		NA		NA		NA		NA		NA		NA		NA		NA		NA		NA		NA
					NA		NA		NA		NA		NA		NA		NA		NA		NA		NA		NA		NA		NA		NA		NA		NA		NA		NA		NA		NA		NA		NA		NA
					NA		NA		NA		NA		NA		NA		NA		NA		NA		NA		NA		NA		NA		NA		NA		NA		NA		NA		NA		NA		NA		NA		NA
					NA		NA		NA		NA		NA		NA		NA		NA		NA		NA		NA		NA		NA		NA		NA		NA		NA		NA		NA		NA		NA		NA		NA
					NA		NA		NA		NA		NA		NA		NA		NA		NA		NA		NA		NA		NA		NA		NA		NA		NA		NA		NA		NA		NA		NA		NA
					NA		NA		NA		NA		NA		NA		NA		NA		NA		NA		NA		NA		NA		NA		NA		NA		NA		NA		NA		NA		NA		NA		NA
					NA		NA		NA		NA		NA		NA		NA		NA		NA		NA		NA		NA		NA		NA		NA		NA		NA		NA		NA		NA		NA		NA		NA
					NA		NA		NA		NA		NA		NA		NA		NA		NA		NA		NA		NA		NA		NA		NA		NA		NA		NA		NA		NA		NA		NA		NA
					NA		NA		NA		NA		NA		NA		NA		NA		NA		NA		NA		NA		NA		NA		NA		NA		NA		NA		NA		NA		NA		NA		NA
					NA		NA		NA		NA		NA		NA		NA		NA		NA		NA		NA		NA		NA		NA		NA		NA		NA		NA		NA		NA		NA		NA		NA
					NA		NA		NA		NA		NA		NA		NA		NA		NA		NA		NA		NA		NA		NA		NA		NA		NA		NA		NA		NA		NA		NA		NA
					NA		NA		NA		NA		NA		NA		NA		NA		NA		NA		NA		NA		NA		NA		NA		NA		NA		NA		NA		NA		NA		NA		NA
					NA		NA		NA		NA		NA		NA		NA		NA		NA		NA		NA		NA		NA		NA		NA		NA		NA		NA		NA		NA		NA		NA		NA
					NA		NA		NA		NA		NA		NA		NA		NA		NA		NA		NA		NA		NA		NA		NA		NA		NA		NA		NA		NA		NA		NA		NA
					NA		NA		NA		NA		NA		NA		NA		NA		NA		NA		NA		NA		NA		NA		NA		NA		NA		NA		NA		NA		NA		NA		NA
					NA		NA		NA		NA		NA		NA		NA		NA		NA		NA		NA		NA		NA		NA		NA		NA		NA		NA		NA		NA		NA		NA		NA
					NA		NA		NA		NA		NA		NA		NA		NA		NA		NA		NA		NA		NA		NA		NA		NA		NA		NA		NA		NA		NA		NA		NA
					NA		NA		NA		NA		NA		NA		NA		NA		NA		NA		NA		NA		NA		NA		NA		NA		NA		NA		NA		NA		NA		NA		NA
					NA		NA		NA		NA		NA		NA		NA		NA		NA		NA		NA		NA		NA		NA		NA		NA		NA		NA		NA		NA		NA		NA		NA
					NA		NA		NA		NA		NA		NA		NA		NA		NA		NA		NA		NA		NA		NA		NA		NA		NA		NA		NA		NA		NA		NA		NA
					NA		NA		NA		NA		NA		NA		NA		NA		NA		NA		NA		NA		NA		NA		NA		NA		NA		NA		NA		NA		NA		NA		NA
					NA		NA		NA		NA		NA		NA		NA		NA		NA		NA		NA		NA		NA		NA		NA		NA		NA		NA		NA		NA		NA		NA		NA
					NA		NA		NA		NA		NA		NA		NA		NA		NA		NA		NA		NA		NA		NA		NA		NA		NA		NA		NA		NA		NA		NA		NA
					NA		NA		NA		NA		NA		NA		NA		NA		NA		NA		NA		NA		NA		NA		NA		NA		NA		NA		NA		NA		NA		NA		NA
					NA		NA		NA		NA		NA		NA		NA		NA		NA		NA		NA		NA		NA		NA		NA		NA		NA		NA		NA		NA		NA		NA		NA
					NA		NA		NA		NA		NA		NA		NA		NA		NA		NA		NA		NA		NA		NA		NA		NA		NA		NA		NA		NA		NA		NA		NA
					NA		NA		NA		NA		NA		NA		NA		NA		NA		NA		NA		NA		NA		NA		NA		NA		NA		NA		NA		NA		NA		NA		NA
					NA		NA		NA		NA		NA		NA		NA		NA		NA		NA		NA		NA		NA		NA		NA		NA		NA		NA		NA		NA		NA		NA		NA
					NA		NA		NA		NA		NA		NA		NA		NA		NA		NA		NA		NA		NA		NA		NA		NA		NA		NA		NA		NA		NA		NA		NA
					NA		NA		NA		NA		NA		NA		NA		NA		NA		NA		NA		NA		NA		NA		NA		NA		NA		NA		NA		NA		NA		NA		NA
					NA		NA		NA		NA		NA		NA		NA		NA		NA		NA		NA		NA		NA		NA		NA		NA		NA		NA		NA		NA		NA		NA		NA
					NA		NA		NA		NA		NA		NA		NA		NA		NA		NA		NA		NA		NA		NA		NA		NA		NA		NA		NA		NA		NA		NA		NA
					NA		NA		NA		NA		NA		NA		NA		NA		NA		NA		NA		NA		NA		NA		NA		NA		NA		NA		NA		NA		NA		NA		NA
					NA		NA		NA		NA		NA		NA		NA		NA		NA		NA		NA		NA		NA		NA		NA		NA		NA		NA		NA		NA		NA		NA		NA
					NA		NA		NA		NA		NA		NA		NA		NA		NA		NA		NA		NA		NA		NA		NA		NA		NA		NA		NA		NA		NA		NA		NA
					NA		NA		NA		NA		NA		NA		NA		NA		NA		NA		NA		NA		NA		NA		NA		NA		NA		NA		NA		NA		NA		NA		NA
					NA		NA		NA		NA		NA		NA		NA		NA		NA		NA		NA		NA		NA		NA		NA		NA		NA		NA		NA		NA		NA		NA		NA
					NA		NA		NA		NA		NA		NA		NA		NA		NA		NA		NA		NA		NA		NA		NA		NA		NA		NA		NA		NA		NA		NA		NA
					NA		NA		NA		NA		NA		NA		NA		NA		NA		NA		NA		NA		NA		NA		NA		NA		NA		NA		NA		NA		NA		NA		NA
					NA		NA		NA		NA		NA		NA		NA		NA		NA		NA		NA		NA		NA		NA		NA		NA		NA		NA		NA		NA		NA		NA		NA
					NA		NA		NA		NA		NA		NA		NA		NA		NA		NA		NA		NA		NA		NA		NA		NA		NA		NA		NA		NA		NA		NA		NA
					NA		NA		NA		NA		NA		NA		NA		NA		NA		NA		NA		NA		NA		NA		NA		NA		NA		NA		NA		NA		NA		NA		NA
					NA		NA		NA		NA		NA		NA		NA		NA		NA		NA		NA		NA		NA		NA		NA		NA		NA		NA		NA		NA		NA		NA		NA
					NA		NA		NA		NA		NA		NA		NA		NA		NA		NA		NA		NA		NA		NA		NA		NA		NA		NA		NA		NA		NA		NA		NA
					NA		NA		NA		NA		NA		NA		NA		NA		NA		NA		NA		NA		NA		NA		NA		NA		NA		NA		NA		NA		NA		NA		NA
					NA		NA		NA		NA		NA		NA		NA		NA		NA		NA		NA		NA		NA		NA		NA		NA		NA		NA		NA		NA		NA		NA		NA
					NA		NA		NA		NA		NA		NA		NA		NA		NA		NA		NA		NA		NA		NA		NA		NA		NA		NA		NA		NA		NA		NA		NA
					NA		NA		NA		NA		NA		NA		NA		NA		NA		NA		NA		NA		NA		NA		NA		NA		NA		NA		NA		NA		NA		NA		NA
					NA		NA		NA		NA		NA		NA		NA		NA		NA		NA		NA		NA		NA		NA		NA		NA		NA		NA		NA		NA		NA		NA		NA
					NA		NA		NA		NA		NA		NA		NA		NA		NA		NA		NA		NA		NA		NA		NA		NA		NA		NA		NA		NA		NA		NA		NA
					NA		NA		NA		NA		NA		NA		NA		NA		NA		NA		NA		NA		NA		NA		NA		NA		NA		NA		NA		NA		NA		NA		NA
					NA		NA		NA		NA		NA		NA		NA		NA		NA		NA		NA		NA		NA		NA		NA		NA		NA		NA		NA		NA		NA		NA		NA
					NA		NA		NA		NA		NA		NA		NA		NA		NA		NA		NA		NA		NA		NA		NA		NA		NA		NA		NA		NA		NA		NA		NA
					NA		NA		NA		NA		NA		NA		NA		NA		NA		NA		NA		NA		NA		NA		NA		NA		NA		NA		NA		NA		NA		NA		NA
					NA		NA		NA		NA		NA		NA		NA		NA		NA		NA		NA		NA		NA		NA		NA		NA		NA		NA		NA		NA		NA		NA		NA
					NA		NA		NA		NA		NA		NA		NA		NA		NA		NA		NA		NA		NA		NA		NA		NA		NA		NA		NA		NA		NA		NA		NA
					NA		NA		NA		NA		NA		NA		NA		NA		NA		NA		NA		NA		NA		NA		NA		NA		NA		NA		NA		NA		NA		NA		NA
					NA		NA		NA		NA		NA		NA		NA		NA		NA		NA		NA		NA		NA		NA		NA		NA		NA		NA		NA		NA		NA		NA		NA
					NA		NA		NA		NA		NA		NA		NA		NA		NA		NA		NA		NA		NA		NA		NA		NA		NA		NA		NA		NA		NA		NA		NA
					NA		NA		NA		NA		NA		NA		NA		NA		NA		NA		NA		NA		NA		NA		NA		NA		NA		NA		NA		NA		NA		NA		NA
					NA		NA		NA		NA		NA		NA		NA		NA		NA		NA		NA		NA		NA		NA		NA		NA		NA		NA		NA		NA		NA		NA		NA
					NA		NA		NA		NA		NA		NA		NA		NA		NA		NA		NA		NA		NA		NA		NA		NA		NA		NA		NA		NA		NA		NA		NA
					NA		NA		NA		NA		NA		NA		NA		NA		NA		NA		NA		NA		NA		NA		NA		NA		NA		NA		NA		NA		NA		NA		NA
					NA		NA		NA		NA		NA		NA		NA		NA		NA		NA		NA		NA		NA		NA		NA		NA		NA		NA		NA		NA		NA		NA		NA
					NA		NA		NA		NA		NA		NA		NA		NA		NA		NA		NA		NA		NA		NA		NA		NA		NA		NA		NA		NA		NA		NA		NA
					NA		NA		NA		NA		NA		NA		NA		NA		NA		NA		NA		NA		NA		NA		NA		NA		NA		NA		NA		NA		NA		NA		NA
					NA		NA		NA		NA		NA		NA		NA		NA		NA		NA		NA		NA		NA		NA		NA		NA		NA		NA		NA		NA		NA		NA		NA
					NA		NA		NA		NA		NA		NA		NA		NA		NA		NA		NA		NA		NA		NA		NA		NA		NA		NA		NA		NA		NA		NA		NA
					NA		NA		NA		NA		NA		NA		NA		NA		NA		NA		NA		NA		NA		NA		NA		NA		NA		NA		NA		NA		NA		NA		NA
					NA		NA		NA		NA		NA		NA		NA		NA		NA		NA		NA		NA		NA		NA		NA		NA		NA		NA		NA		NA		NA		NA		NA
					NA		NA		NA		NA		NA		NA		NA		NA		NA		NA		NA		NA		NA		NA		NA		NA		NA		NA		NA		NA		NA		NA		NA
					NA		NA		NA		NA		NA		NA		NA		NA		NA		NA		NA		NA		NA		NA		NA		NA		NA		NA		NA		NA		NA		NA		NA
					NA		NA		NA		NA		NA		NA		NA		NA		NA		NA		NA		NA		NA		NA		NA		NA		NA		NA		NA		NA		NA		NA		NA
					NA		NA		NA		NA		NA		NA		NA		NA		NA		NA		NA		NA		NA		NA		NA		NA		NA		NA		NA		NA		NA		NA		NA
					NA		NA		NA		NA		NA		NA		NA		NA		NA		NA		NA		NA		NA		NA		NA		NA		NA		NA		NA		NA		NA		NA		NA
					NA		NA		NA		NA		NA		NA		NA		NA		NA		NA		NA		NA		NA		NA		NA		NA		NA		NA		NA		NA		NA		NA		NA
					NA		NA		NA		NA		NA		NA		NA		NA		NA		NA		NA		NA		NA		NA		NA		NA		NA		NA		NA		NA		NA		NA		NA
					NA		NA		NA		NA		NA		NA		NA		NA		NA		NA		NA		NA		NA		NA		NA		NA		NA		NA		NA		NA		NA		NA		NA
					NA		NA		NA		NA		NA		NA		NA		NA		NA		NA		NA		NA		NA		NA		NA		NA		NA		NA		NA		NA		NA		NA		NA
					NA		NA		NA		NA		NA		NA		NA		NA		NA		NA		NA		NA		NA		NA		NA		NA		NA		NA		NA		NA		NA		NA		NA
					NA		NA		NA		NA		NA		NA		NA		NA		NA		NA		NA		NA		NA		NA		NA		NA		NA		NA		NA		NA		NA		NA		NA
					NA		NA		NA		NA		NA		NA		NA		NA		NA		NA		NA		NA		NA		NA		NA		NA		NA		NA		NA		NA		NA		NA		NA
					NA		NA		NA		NA		NA		NA		NA		NA		NA		NA		NA		NA		NA		NA		NA		NA		NA		NA		NA		NA		NA		NA		NA
					NA		NA		NA		NA		NA		NA		NA		NA		NA		NA		NA		NA		NA		NA		NA		NA		NA		NA		NA		NA		NA		NA		NA
					NA		NA		NA		NA		NA		NA		NA		NA		NA		NA		NA		NA		NA		NA		NA		NA		NA		NA		NA		NA		NA		NA		NA
					NA		NA		NA		NA		NA		NA		NA		NA		NA		NA		NA		NA		NA		NA		NA		NA		NA		NA		NA		NA		NA		NA		NA
					NA		NA		NA		NA		NA		NA		NA		NA		NA		NA		NA		NA		NA		NA		NA		NA		NA		NA		NA		NA		NA		NA		NA
					NA		NA		NA		NA		NA		NA		NA		NA		NA		NA		NA		NA		NA		NA		NA		NA		NA		NA		NA		NA		NA		NA		NA
					NA		NA		NA		NA		NA		NA		NA		NA		NA		NA		NA		NA		NA		NA		NA		NA		NA		NA		NA		NA		NA		NA		NA
					NA		NA		NA		NA		NA		NA		NA		NA		NA		NA		NA		NA		NA		NA		NA		NA		NA		NA		NA		NA		NA		NA		NA
					NA		NA		NA		NA		NA		NA		NA		NA		NA		NA		NA		NA		NA		NA		NA		NA		NA		NA		NA		NA		NA		NA		NA
					NA		NA		NA		NA		NA		NA		NA		NA		NA		NA		NA		NA		NA		NA		NA		NA		NA		NA		NA		NA		NA		NA		NA
					NA		NA		NA		NA		NA		NA		NA		NA		NA		NA		NA		NA		NA		NA		NA		NA		NA		NA		NA		NA		NA		NA		NA
					NA		NA		NA		NA		NA		NA		NA		NA		NA		NA		NA		NA		NA		NA		NA		NA		NA		NA		NA		NA		NA		NA		NA
					NA		NA		NA		NA		NA		NA		NA		NA		NA		NA		NA		NA		NA		NA		NA		NA		NA		NA		NA		NA		NA		NA		NA
					NA		NA		NA		NA		NA		NA		NA		NA		NA		NA		NA		NA		NA		NA		NA		NA		NA		NA		NA		NA		NA		NA		NA
					NA		NA		NA		NA		NA		NA		NA		NA		NA		NA		NA		NA		NA		NA		NA		NA		NA		NA		NA		NA		NA		NA		NA
					NA		NA		NA		NA		NA		NA		NA		NA		NA		NA		NA		NA		NA		NA		NA		NA		NA		NA		NA		NA		NA		NA		NA
					NA		NA		NA		NA		NA		NA		NA		NA		NA		NA		NA		NA		NA		NA		NA		NA		NA		NA		NA		NA		NA		NA		NA
					NA		NA		NA		NA		NA		NA		NA		NA		NA		NA		NA		NA		NA		NA		NA		NA		NA		NA		NA		NA		NA		NA		NA
					NA		NA		NA		NA		NA		NA		NA		NA		NA		NA		NA		NA		NA		NA		NA		NA		NA		NA		NA		NA		NA		NA		NA
					NA		NA		NA		NA		NA		NA		NA		NA		NA		NA		NA		NA		NA		NA		NA		NA		NA		NA		NA		NA		NA		NA		NA
					NA		NA		NA		NA		NA		NA		NA		NA		NA		NA		NA		NA		NA		NA		NA		NA		NA		NA		NA		NA		NA		NA		NA
					NA		NA		NA		NA		NA		NA		NA		NA		NA		NA		NA		NA		NA		NA		NA		NA		NA		NA		NA		NA		NA		NA		NA
					NA		NA		NA		NA		NA		NA		NA		NA		NA		NA		NA		NA		NA		NA		NA		NA		NA		NA		NA		NA		NA		NA		NA
					NA		NA		NA		NA		NA		NA		NA		NA		NA		NA		NA		NA		NA		NA		NA		NA		NA		NA		NA		NA		NA		NA		NA
					NA		NA		NA		NA		NA		NA		NA		NA		NA		NA		NA		NA		NA		NA		NA		NA		NA		NA		NA		NA		NA		NA		NA
					NA		NA		NA		NA		NA		NA		NA		NA		NA		NA		NA		NA		NA		NA		NA		NA		NA		NA		NA		NA		NA		NA		NA
					NA		NA		NA		NA		NA		NA		NA		NA		NA		NA		NA		NA		NA		NA		NA		NA		NA		NA		NA		NA		NA		NA		NA
					NA		NA		NA		NA		NA		NA		NA		NA		NA		NA		NA		NA		NA		NA		NA		NA		NA		NA		NA		NA		NA		NA		NA
					NA		NA		NA		NA		NA		NA		NA		NA		NA		NA		NA		NA		NA		NA		NA		NA		NA		NA		NA		NA		NA		NA		NA
					NA		NA		NA		NA		NA		NA		NA		NA		NA		NA		NA		NA		NA		NA		NA		NA		NA		NA		NA		NA		NA		NA		NA
					NA		NA		NA		NA		NA		NA		NA		NA		NA		NA		NA		NA		NA		NA		NA		NA		NA		NA		NA		NA		NA		NA		NA
					NA		NA		NA		NA		NA		NA		NA		NA		NA		NA		NA		NA		NA		NA		NA		NA		NA		NA		NA		NA		NA		NA		NA
					NA		NA		NA		NA		NA		NA		NA		NA		NA		NA		NA		NA		NA		NA		NA		NA		NA		NA		NA		NA		NA		NA		NA
					NA		NA		NA		NA		NA		NA		NA		NA		NA		NA		NA		NA		NA		NA		NA		NA		NA		NA		NA		NA		NA		NA		NA
					NA		NA		NA		NA		NA		NA		NA		NA		NA		NA		NA		NA		NA		NA		NA		NA		NA		NA		NA		NA		NA		NA		NA
					NA		NA		NA		NA		NA		NA		NA		NA		NA		NA		NA		NA		NA		NA		NA		NA		NA		NA		NA		NA		NA		NA		NA
					NA		NA		NA		NA		NA		NA		NA		NA		NA		NA		NA		NA		NA		NA		NA		NA		NA		NA		NA		NA		NA		NA		NA
					NA		NA		NA		NA		NA		NA		NA		NA		NA		NA		NA		NA		NA		NA		NA		NA		NA		NA		NA		NA		NA		NA		NA
					NA		NA		NA		NA		NA		NA		NA		NA		NA		NA		NA		NA		NA		NA		NA		NA		NA		NA		NA		NA		NA		NA		NA
					NA		NA		NA		NA		NA		NA		NA		NA		NA		NA		NA		NA		NA		NA		NA		NA		NA		NA		NA		NA		NA		NA		NA
					NA		NA		NA		NA		NA		NA		NA		NA		NA		NA		NA		NA		NA		NA		NA		NA		NA		NA		NA		NA		NA		NA		NA
					NA		NA		NA		NA		NA		NA		NA		NA		NA		NA		NA		NA		NA		NA		NA		NA		NA		NA		NA		NA		NA		NA		NA
					NA		NA		NA		NA		NA		NA		NA		NA		NA		NA		NA		NA		NA		NA		NA		NA		NA		NA		NA		NA		NA		NA		NA
					NA		NA		NA		NA		NA		NA		NA		NA		NA		NA		NA		NA		NA		NA		NA		NA		NA		NA		NA		NA		NA		NA		NA
					NA		NA		NA		NA		NA		NA		NA		NA		NA		NA		NA		NA		NA		NA		NA		NA		NA		NA		NA		NA		NA		NA		NA
					NA		NA		NA		NA		NA		NA		NA		NA		NA		NA		NA		NA		NA		NA		NA		NA		NA		NA		NA		NA		NA		NA		NA
					NA		NA		NA		NA		NA		NA		NA		NA		NA		NA		NA		NA		NA		NA		NA		NA		NA		NA		NA		NA		NA		NA		NA
					NA		NA		NA		NA		NA		NA		NA		NA		NA		NA		NA		NA		NA		NA		NA		NA		NA		NA		NA		NA		NA		NA		NA
					NA		NA		NA		NA		NA		NA		NA		NA		NA		NA		NA		NA		NA		NA		NA		NA		NA		NA		NA		NA		NA		NA		NA
					NA		NA		NA		NA		NA		NA		NA		NA		NA		NA		NA		NA		NA		NA		NA		NA		NA		NA		NA		NA		NA		NA		NA
					NA		NA		NA		NA		NA		NA		NA		NA		NA		NA		NA		NA		NA		NA		NA		NA		NA		NA		NA		NA		NA		NA		NA
					NA		NA		NA		NA		NA		NA		NA		NA		NA		NA		NA		NA		NA		NA		NA		NA		NA		NA		NA		NA		NA		NA		NA
					NA		NA		NA		NA		NA		NA		NA		NA		NA		NA		NA		NA		NA		NA		NA		NA		NA		NA		NA		NA		NA		NA		NA
					NA		NA		NA		NA		NA		NA		NA		NA		NA		NA		NA		NA		NA		NA		NA		NA		NA		NA		NA		NA		NA		NA		NA
					NA		NA		NA		NA		NA		NA		NA		NA		NA		NA		NA		NA		NA		NA		NA		NA		NA		NA		NA		NA		NA		NA		NA
					NA		NA		NA		NA		NA		NA		NA		NA		NA		NA		NA		NA		NA		NA		NA		NA		NA		NA		NA		NA		NA		NA		NA
					NA		NA		NA		NA		NA		NA		NA		NA		NA		NA		NA		NA		NA		NA		NA		NA		NA		NA		NA		NA		NA		NA		NA
					NA		NA		NA		NA		NA		NA		NA		NA		NA		NA		NA		NA		NA		NA		NA		NA		NA		NA		NA		NA		NA		NA		NA
					NA		NA		NA		NA		NA		NA		NA		NA		NA		NA		NA		NA		NA		NA		NA		NA		NA		NA		NA		NA		NA		NA		NA
					NA		NA		NA		NA		NA		NA		NA		NA		NA		NA		NA		NA		NA		NA		NA		NA		NA		NA		NA		NA		NA		NA		NA
					NA		NA		NA		NA		NA		NA		NA		NA		NA		NA		NA		NA		NA		NA		NA		NA		NA		NA		NA		NA		NA		NA		NA
					NA		NA		NA		NA		NA		NA		NA		NA		NA		NA		NA		NA		NA		NA		NA		NA		NA		NA		NA		NA		NA		NA		NA
					NA		NA		NA		NA		NA		NA		NA		NA		NA		NA		NA		NA		NA		NA		NA		NA		NA		NA		NA		NA		NA		NA		NA
					NA		NA		NA		NA		NA		NA		NA		NA		NA		NA		NA		NA		NA		NA		NA		NA		NA		NA		NA		NA		NA		NA		NA
					NA		NA		NA		NA		NA		NA		NA		NA		NA		NA		NA		NA		NA		NA		NA		NA		NA		NA		NA		NA		NA		NA		NA
					NA		NA		NA		NA		NA		NA		NA		NA		NA		NA		NA		NA		NA		NA		NA		NA		NA		NA		NA		NA		NA		NA		NA
					NA		NA		NA		NA		NA		NA		NA		NA		NA		NA		NA		NA		NA		NA		NA		NA		NA		NA		NA		NA		NA		NA		NA
					NA		NA		NA		NA		NA		NA		NA		NA		NA		NA		NA		NA		NA		NA		NA		NA		NA		NA		NA		NA		NA		NA		NA
					NA		NA		NA		NA		NA		NA		NA		NA		NA		NA		NA		NA		NA		NA		NA		NA		NA		NA		NA		NA		NA		NA		NA
					NA		NA		NA		NA		NA		NA		NA		NA		NA		NA		NA		NA		NA		NA		NA		NA		NA		NA		NA		NA		NA		NA		NA
					NA		NA		NA		NA		NA		NA		NA		NA		NA		NA		NA		NA		NA		NA		NA		NA		NA		NA		NA		NA		NA		NA		NA
					NA		NA		NA		NA		NA		NA		NA		NA		NA		NA		NA		NA		NA		NA		NA		NA		NA		NA		NA		NA		NA		NA		NA
					NA		NA		NA		NA		NA		NA		NA		NA		NA		NA		NA		NA		NA		NA		NA		NA		NA		NA		NA		NA		NA		NA		NA
					NA		NA		NA		NA		NA		NA		NA		NA		NA		NA		NA		NA		NA		NA		NA		NA		NA		NA		NA		NA		NA		NA		NA
					NA		NA		NA		NA		NA		NA		NA		NA		NA		NA		NA		NA		NA		NA		NA		NA		NA		NA		NA		NA		NA		NA		NA
					NA		NA		NA		NA		NA		NA		NA		NA		NA		NA		NA		NA		NA		NA		NA		NA		NA		NA		NA		NA		NA		NA		NA
					NA		NA		NA		NA		NA		NA		NA		NA		NA		NA		NA		NA		NA		NA		NA		NA		NA		NA		NA		NA		NA		NA		NA
					NA		NA		NA		NA		NA		NA		NA		NA		NA		NA		NA		NA		NA		NA		NA		NA		NA		NA		NA		NA		NA		NA		NA
					NA		NA		NA		NA		NA		NA		NA		NA		NA		NA		NA		NA		NA		NA		NA		NA		NA		NA		NA		NA		NA		NA		NA
					NA		NA		NA		NA		NA		NA		NA		NA		NA		NA		NA		NA		NA		NA		NA		NA		NA		NA		NA		NA		NA		NA		NA
					NA		NA		NA		NA		NA		NA		NA		NA		NA		NA		NA		NA		NA		NA		NA		NA		NA		NA		NA		NA		NA		NA		NA
					NA		NA		NA		NA		NA		NA		NA		NA		NA		NA		NA		NA		NA		NA		NA		NA		NA		NA		NA		NA		NA		NA		NA
					NA		NA		NA		NA		NA		NA		NA		NA		NA		NA		NA		NA		NA		NA		NA		NA		NA		NA		NA		NA		NA		NA		NA
					NA		NA		NA		NA		NA		NA		NA		NA		NA		NA		NA		NA		NA		NA		NA		NA		NA		NA		NA		NA		NA		NA		NA
					NA		NA		NA		NA		NA		NA		NA		NA		NA		NA		NA		NA		NA		NA		NA		NA		NA		NA		NA		NA		NA		NA		NA
					NA		NA		NA		NA		NA		NA		NA		NA		NA		NA		NA		NA		NA		NA		NA		NA		NA		NA		NA		NA		NA		NA		NA
					NA		NA		NA		NA		NA		NA		NA		NA		NA		NA		NA		NA		NA		NA		NA		NA		NA		NA		NA		NA		NA		NA		NA
					NA		NA		NA		NA		NA		NA		NA		NA		NA		NA		NA		NA		NA		NA		NA		NA		NA		NA		NA		NA		NA		NA		NA
					NA		NA		NA		NA		NA		NA		NA		NA		NA		NA		NA		NA		NA		NA		NA		NA		NA		NA		NA		NA		NA		NA		NA
					NA		NA		NA		NA		NA		NA		NA		NA		NA		NA		NA		NA		NA		NA		NA		NA		NA		NA		NA		NA		NA		NA		NA
					NA		NA		NA		NA		NA		NA		NA		NA		NA		NA		NA		NA		NA		NA		NA		NA		NA		NA		NA		NA		NA		NA		NA
					NA		NA		NA		NA		NA		NA		NA		NA		NA		NA		NA		NA		NA		NA		NA		NA		NA		NA		NA		NA		NA		NA		NA
					NA		NA		NA		NA		NA		NA		NA		NA		NA		NA		NA		NA		NA		NA		NA		NA		NA		NA		NA		NA		NA		NA		NA
					NA		NA		NA		NA		NA		NA		NA		NA		NA		NA		NA		NA		NA		NA		NA		NA		NA		NA		NA		NA		NA		NA		NA
					NA		NA		NA		NA		NA		NA		NA		NA		NA		NA		NA		NA		NA		NA		NA		NA		NA		NA		NA		NA		NA		NA		NA
					NA		NA		NA		NA		NA		NA		NA		NA		NA		NA		NA		NA		NA		NA		NA		NA		NA		NA		NA		NA		NA		NA		NA
					NA		NA		NA		NA		NA		NA		NA		NA		NA		NA		NA		NA		NA		NA		NA		NA		NA		NA		NA		NA		NA		NA		NA
					NA		NA		NA		NA		NA		NA		NA		NA		NA		NA		NA		NA		NA		NA		NA		NA		NA		NA		NA		NA		NA		NA		NA
					NA		NA		NA		NA		NA		NA		NA		NA		NA		NA		NA		NA		NA		NA		NA		NA		NA		NA		NA		NA		NA		NA		NA
					NA		NA		NA		NA		NA		NA		NA		NA		NA		NA		NA		NA		NA		NA		NA		NA		NA		NA		NA		NA		NA		NA		NA
					NA		NA		NA		NA		NA		NA		NA		NA		NA		NA		NA		NA		NA		NA		NA		NA		NA		NA		NA		NA		NA		NA		NA
					NA		NA		NA		NA		NA		NA		NA		NA		NA		NA		NA		NA		NA		NA		NA		NA		NA		NA		NA		NA		NA		NA		NA
					NA		NA		NA		NA		NA		NA		NA		NA		NA		NA		NA		NA		NA		NA		NA		NA		NA		NA		NA		NA		NA		NA		NA
					NA		NA		NA		NA		NA		NA		NA		NA		NA		NA		NA		NA		NA		NA		NA		NA		NA		NA		NA		NA		NA		NA		NA
					NA		NA		NA		NA		NA		NA		NA		NA		NA		NA		NA		NA		NA		NA		NA		NA		NA		NA		NA		NA		NA		NA		NA
					NA		NA		NA		NA		NA		NA		NA		NA		NA		NA		NA		NA		NA		NA		NA		NA		NA		NA		NA		NA		NA		NA		NA
					NA		NA		NA		NA		NA		NA		NA		NA		NA		NA		NA		NA		NA		NA		NA		NA		NA		NA		NA		NA		NA		NA		NA
					NA		NA		NA		NA		NA		NA		NA		NA		NA		NA		NA		NA		NA		NA		NA		NA		NA		NA		NA		NA		NA		NA		NA
					NA		NA		NA		NA		NA		NA		NA		NA		NA		NA		NA		NA		NA		NA		NA		NA		NA		NA		NA		NA		NA		NA		NA
					NA		NA		NA		NA		NA		NA		NA		NA		NA		NA		NA		NA		NA		NA		NA		NA		NA		NA		NA		NA		NA		NA		NA
					NA		NA		NA		NA		NA		NA		NA		NA		NA		NA		NA		NA		NA		NA		NA		NA		NA		NA		NA		NA		NA		NA		NA
					NA		NA		NA		NA		NA		NA		NA		NA		NA		NA		NA		NA		NA		NA		NA		NA		NA		NA		NA		NA		NA		NA		NA
					NA		NA		NA		NA		NA		NA		NA		NA		NA		NA		NA		NA		NA		NA		NA		NA		NA		NA		NA		NA		NA		NA		NA
					NA		NA		NA		NA		NA		NA		NA		NA		NA		NA		NA		NA		NA		NA		NA		NA		NA		NA		NA		NA		NA		NA		NA
					NA		NA		NA		NA		NA		NA		NA		NA		NA		NA		NA		NA		NA		NA		NA		NA		NA		NA		NA		NA		NA		NA		NA
					NA		NA		NA		NA		NA		NA		NA		NA		NA		NA		NA		NA		NA		NA		NA		NA		NA		NA		NA		NA		NA		NA		NA
					NA		NA		NA		NA		NA		NA		NA		NA		NA		NA		NA		NA		NA		NA		NA		NA		NA		NA		NA		NA		NA		NA		NA
					NA		NA		NA		NA		NA		NA		NA		NA		NA		NA		NA		NA		NA		NA		NA		NA		NA		NA		NA		NA		NA		NA		NA
					NA		NA		NA		NA		NA		NA		NA		NA		NA		NA		NA		NA		NA		NA		NA		NA		NA		NA		NA		NA		NA		NA		NA
					NA		NA		NA		NA		NA		NA		NA		NA		NA		NA		NA		NA		NA		NA		NA		NA		NA		NA		NA		NA		NA		NA		NA
					NA		NA		NA		NA		NA		NA		NA		NA		NA		NA		NA		NA		NA		NA		NA		NA		NA		NA		NA		NA		NA		NA		NA
					NA		NA		NA		NA		NA		NA		NA		NA		NA		NA		NA		NA		NA		NA		NA		NA		NA		NA		NA		NA		NA		NA		NA
					NA		NA		NA		NA		NA		NA		NA		NA		NA		NA		NA		NA		NA		NA		NA		NA		NA		NA		NA		NA		NA		NA		NA
					NA		NA		NA		NA		NA		NA		NA		NA		NA		NA		NA		NA		NA		NA		NA		NA		NA		NA		NA		NA		NA		NA		NA
					NA		NA		NA		NA		NA		NA		NA		NA		NA		NA		NA		NA		NA		NA		NA		NA		NA		NA		NA		NA		NA		NA		NA
					NA		NA		NA		NA		NA		NA		NA		NA		NA		NA		NA		NA		NA		NA		NA		NA		NA		NA		NA		NA		NA		NA		NA
					NA		NA		NA		NA		NA		NA		NA		NA		NA		NA		NA		NA		NA		NA		NA		NA		NA		NA		NA		NA		NA		NA		NA
					NA		NA		NA		NA		NA		NA		NA		NA		NA		NA		NA		NA		NA		NA		NA		NA		NA		NA		NA		NA		NA		NA		NA
					NA		NA		NA		NA		NA		NA		NA		NA		NA		NA		NA		NA		NA		NA		NA		NA		NA		NA		NA		NA		NA		NA		NA
					NA		NA		NA		NA		NA		NA		NA		NA		NA		NA		NA		NA		NA		NA		NA		NA		NA		NA		NA		NA		NA		NA		NA
					NA		NA		NA		NA		NA		NA		NA		NA		NA		NA		NA		NA		NA		NA		NA		NA		NA		NA		NA		NA		NA		NA		NA
					NA		NA		NA		NA		NA		NA		NA		NA		NA		NA		NA		NA		NA		NA		NA		NA		NA		NA		NA		NA		NA		NA		NA
					NA		NA		NA		NA		NA		NA		NA		NA		NA		NA		NA		NA		NA		NA		NA		NA		NA		NA		NA		NA		NA		NA		NA
					NA		NA		NA		NA		NA		NA		NA		NA		NA		NA		NA		NA		NA		NA		NA		NA		NA		NA		NA		NA		NA		NA		NA
					NA		NA		NA		NA		NA		NA		NA		NA		NA		NA		NA		NA		NA		NA		NA		NA		NA		NA		NA		NA		NA		NA		NA
					NA		NA		NA		NA		NA		NA		NA		NA		NA		NA		NA		NA		NA		NA		NA		NA		NA		NA		NA		NA		NA		NA		NA
					NA		NA		NA		NA		NA		NA		NA		NA		NA		NA		NA		NA		NA		NA		NA		NA		NA		NA		NA		NA		NA		NA		NA
					NA		NA		NA		NA		NA		NA		NA		NA		NA		NA		NA		NA		NA		NA		NA		NA		NA		NA		NA		NA		NA		NA		NA
					NA		NA		NA		NA		NA		NA		NA		NA		NA		NA		NA		NA		NA		NA		NA		NA		NA		NA		NA		NA		NA		NA		NA
					NA		NA		NA		NA		NA		NA		NA		NA		NA		NA		NA		NA		NA		NA		NA		NA		NA		NA		NA		NA		NA		NA		NA
					NA		NA		NA		NA		NA		NA		NA		NA		NA		NA		NA		NA		NA		NA		NA		NA		NA		NA		NA		NA		NA		NA		NA
					NA		NA		NA		NA		NA		NA		NA		NA		NA		NA		NA		NA		NA		NA		NA		NA		NA		NA		NA		NA		NA		NA		NA
					NA		NA		NA		NA		NA		NA		NA		NA		NA		NA		NA		NA		NA		NA		NA		NA		NA		NA		NA		NA		NA		NA		NA
					NA		NA		NA		NA		NA		NA		NA		NA		NA		NA		NA		NA		NA		NA		NA		NA		NA		NA		NA		NA		NA		NA		NA
					NA		NA		NA		NA		NA		NA		NA		NA		NA		NA		NA		NA		NA		NA		NA		NA		NA		NA		NA		NA		NA		NA		NA
					NA		NA		NA		NA		NA		NA		NA		NA		NA		NA		NA		NA		NA		NA		NA		NA		NA		NA		NA		NA		NA		NA		NA
					NA		NA		NA		NA		NA		NA		NA		NA		NA		NA		NA		NA		NA		NA		NA		NA		NA		NA		NA		NA		NA		NA		NA
					NA		NA		NA		NA		NA		NA		NA		NA		NA		NA		NA		NA		NA		NA		NA		NA		NA		NA		NA		NA		NA		NA		NA
					NA		NA		NA		NA		NA		NA		NA		NA		NA		NA		NA		NA		NA		NA		NA		NA		NA		NA		NA		NA		NA		NA		NA
					NA		NA		NA		NA		NA		NA		NA		NA		NA		NA		NA		NA		NA		NA		NA		NA		NA		NA		NA		NA		NA		NA		NA
					NA		NA		NA		NA		NA		NA		NA		NA		NA		NA		NA		NA		NA		NA		NA		NA		NA		NA		NA		NA		NA		NA		NA
					NA		NA		NA		NA		NA		NA		NA		NA		NA		NA		NA		NA		NA		NA		NA		NA		NA		NA		NA		NA		NA		NA		NA
					NA		NA		NA		NA		NA		NA		NA		NA		NA		NA		NA		NA		NA		NA		NA		NA		NA		NA		NA		NA		NA		NA		NA
					NA		NA		NA		NA		NA		NA		NA		NA		NA		NA		NA		NA		NA		NA		NA		NA		NA		NA		NA		NA		NA		NA		NA
					NA		NA		NA		NA		NA		NA		NA		NA		NA		NA		NA		NA		NA		NA		NA		NA		NA		NA		NA		NA		NA		NA		NA
					NA		NA		NA		NA		NA		NA		NA		NA		NA		NA		NA		NA		NA		NA		NA		NA		NA		NA		NA		NA		NA		NA		NA
					NA		NA		NA		NA		NA		NA		NA		NA		NA		NA		NA		NA		NA		NA		NA		NA		NA		NA		NA		NA		NA		NA		NA
					NA		NA		NA		NA		NA		NA		NA		NA		NA		NA		NA		NA		NA		NA		NA		NA		NA		NA		NA		NA		NA		NA		NA
					NA		NA		NA		NA		NA		NA		NA		NA		NA		NA		NA		NA		NA		NA		NA		NA		NA		NA		NA		NA		NA		NA		NA
					NA		NA		NA		NA		NA		NA		NA		NA		NA		NA		NA		NA		NA		NA		NA		NA		NA		NA		NA		NA		NA		NA		NA
					NA		NA		NA		NA		NA		NA		NA		NA		NA		NA		NA		NA		NA		NA		NA		NA		NA		NA		NA		NA		NA		NA		NA
					NA		NA		NA		NA		NA		NA		NA		NA		NA		NA		NA		NA		NA		NA		NA		NA		NA		NA		NA		NA		NA		NA		NA
					NA		NA		NA		NA		NA		NA		NA		NA		NA		NA		NA		NA		NA		NA		NA		NA		NA		NA		NA		NA		NA		NA		NA
					NA		NA		NA		NA		NA		NA		NA		NA		NA		NA		NA		NA		NA		NA		NA		NA		NA		NA		NA		NA		NA		NA		NA
					NA		NA		NA		NA		NA		NA		NA		NA		NA		NA		NA		NA		NA		NA		NA		NA		NA		NA		NA		NA		NA		NA		NA
					NA		NA		NA		NA		NA		NA		NA		NA		NA		NA		NA		NA		NA		NA		NA		NA		NA		NA		NA		NA		NA		NA		NA
					NA		NA		NA		NA		NA		NA		NA		NA		NA		NA		NA		NA		NA		NA		NA		NA		NA		NA		NA		NA		NA		NA		NA
					NA		NA		NA		NA		NA		NA		NA		NA		NA		NA		NA		NA		NA		NA		NA		NA		NA		NA		NA		NA		NA		NA		NA
					NA		NA		NA		NA		NA		NA		NA		NA		NA		NA		NA		NA		NA		NA		NA		NA		NA		NA		NA		NA		NA		NA		NA
					NA		NA		NA		NA		NA		NA		NA		NA		NA		NA		NA		NA		NA		NA		NA		NA		NA		NA		NA		NA		NA		NA		NA
					NA		NA		NA		NA		NA		NA		NA		NA		NA		NA		NA		NA		NA		NA		NA		NA		NA		NA		NA		NA		NA		NA		NA
					NA		NA		NA		NA		NA		NA		NA		NA		NA		NA		NA		NA		NA		NA		NA		NA		NA		NA		NA		NA		NA		NA		NA
					NA		NA		NA		NA		NA		NA		NA		NA		NA		NA		NA		NA		NA		NA		NA		NA		NA		NA		NA		NA		NA		NA		NA
					NA		NA		NA		NA		NA		NA		NA		NA		NA		NA		NA		NA		NA		NA		NA		NA		NA		NA		NA		NA		NA		NA		NA
					NA		NA		NA		NA		NA		NA		NA		NA		NA		NA		NA		NA		NA		NA		NA		NA		NA		NA		NA		NA		NA		NA		NA
					NA		NA		NA		NA		NA		NA		NA		NA		NA		NA		NA		NA		NA		NA		NA		NA		NA		NA		NA		NA		NA		NA		NA
					NA		NA		NA		NA		NA		NA		NA		NA		NA		NA		NA		NA		NA		NA		NA		NA		NA		NA		NA		NA		NA		NA		NA
					NA		NA		NA		NA		NA		NA		NA		NA		NA		NA		NA		NA		NA		NA		NA		NA		NA		NA		NA		NA		NA		NA		NA
					NA		NA		NA		NA		NA		NA		NA		NA		NA		NA		NA		NA		NA		NA		NA		NA		NA		NA		NA		NA		NA		NA		NA
					NA		NA		NA		NA		NA		NA		NA		NA		NA		NA		NA		NA		NA		NA		NA		NA		NA		NA		NA		NA		NA		NA		NA
					NA		NA		NA		NA		NA		NA		NA		NA		NA		NA		NA		NA		NA		NA		NA		NA		NA		NA		NA		NA		NA		NA		NA
					NA		NA		NA		NA		NA		NA		NA		NA		NA		NA		NA		NA		NA		NA		NA		NA		NA		NA		NA		NA		NA		NA		NA
					NA		NA		NA		NA		NA		NA		NA		NA		NA		NA		NA		NA		NA		NA		NA		NA		NA		NA		NA		NA		NA		NA		NA
					NA		NA		NA		NA		NA		NA		NA		NA		NA		NA		NA		NA		NA		NA		NA		NA		NA		NA		NA		NA		NA		NA		NA
					NA		NA		NA		NA		NA		NA		NA		NA		NA		NA		NA		NA		NA		NA		NA		NA		NA		NA		NA		NA		NA		NA		NA
					NA		NA		NA		NA		NA		NA		NA		NA		NA		NA		NA		NA		NA		NA		NA		NA		NA		NA		NA		NA		NA		NA		NA
					NA		NA		NA		NA		NA		NA		NA		NA		NA		NA		NA		NA		NA		NA		NA		NA		NA		NA		NA		NA		NA		NA		NA
					NA		NA		NA		NA		NA		NA		NA		NA		NA		NA		NA		NA		NA		NA		NA		NA		NA		NA		NA		NA		NA		NA		NA
					NA		NA		NA		NA		NA		NA		NA		NA		NA		NA		NA		NA		NA		NA		NA		NA		NA		NA		NA		NA		NA		NA		NA
					NA		NA		NA		NA		NA		NA		NA		NA		NA		NA		NA		NA		NA		NA		NA		NA		NA		NA		NA		NA		NA		NA		NA
					NA		NA		NA		NA		NA		NA		NA		NA		NA		NA		NA		NA		NA		NA		NA		NA		NA		NA		NA		NA		NA		NA		NA
					NA		NA		NA		NA		NA		NA		NA		NA		NA		NA		NA		NA		NA		NA		NA		NA		NA		NA		NA		NA		NA		NA		NA
					NA		NA		NA		NA		NA		NA		NA		NA		NA		NA		NA		NA		NA		NA		NA		NA		NA		NA		NA		NA		NA		NA		NA
					NA		NA		NA		NA		NA		NA		NA		NA		NA		NA		NA		NA		NA		NA		NA		NA		NA		NA		NA		NA		NA		NA		NA
					NA		NA		NA		NA		NA		NA		NA		NA		NA		NA		NA		NA		NA		NA		NA		NA		NA		NA		NA		NA		NA		NA		NA
					NA		NA		NA		NA		NA		NA		NA		NA		NA		NA		NA		NA		NA		NA		NA		NA		NA		NA		NA		NA		NA		NA		NA
					NA		NA		NA		NA		NA		NA		NA		NA		NA		NA		NA		NA		NA		NA		NA		NA		NA		NA		NA		NA		NA		NA		NA
					NA		NA		NA		NA		NA		NA		NA		NA		NA		NA		NA		NA		NA		NA		NA		NA		NA		NA		NA		NA		NA		NA		NA
					NA		NA		NA		NA		NA		NA		NA		NA		NA		NA		NA		NA		NA		NA		NA		NA		NA		NA		NA		NA		NA		NA		NA
					NA		NA		NA		NA		NA		NA		NA		NA		NA		NA		NA		NA		NA		NA		NA		NA		NA		NA		NA		NA		NA		NA		NA
					NA		NA		NA		NA		NA		NA		NA		NA		NA		NA		NA		NA		NA		NA		NA		NA		NA		NA		NA		NA		NA		NA		NA
					NA		NA		NA		NA		NA		NA		NA		NA		NA		NA		NA		NA		NA		NA		NA		NA		NA		NA		NA		NA		NA		NA		NA
					NA		NA		NA		NA		NA		NA		NA		NA		NA		NA		NA		NA		NA		NA		NA		NA		NA		NA		NA		NA		NA		NA		NA
					NA		NA		NA		NA		NA		NA		NA		NA		NA		NA		NA		NA		NA		NA		NA		NA		NA		NA		NA		NA		NA		NA		NA
					NA		NA		NA		NA		NA		NA		NA		NA		NA		NA		NA		NA		NA		NA		NA		NA		NA		NA		NA		NA		NA		NA		NA
					NA		NA		NA		NA		NA		NA		NA		NA		NA		NA		NA		NA		NA		NA		NA		NA		NA		NA		NA		NA		NA		NA		NA
					NA		NA		NA		NA		NA		NA		NA		NA		NA		NA		NA		NA		NA		NA		NA		NA		NA		NA		NA		NA		NA		NA		NA
					NA		NA		NA		NA		NA		NA		NA		NA		NA		NA		NA		NA		NA		NA		NA		NA		NA		NA		NA		NA		NA		NA		NA
					NA		NA		NA		NA		NA		NA		NA		NA		NA		NA		NA		NA		NA		NA		NA		NA		NA		NA		NA		NA		NA		NA		NA
					NA		NA		NA		NA		NA		NA		NA		NA		NA		NA		NA		NA		NA		NA		NA		NA		NA		NA		NA		NA		NA		NA		NA
					NA		NA		NA		NA		NA		NA		NA		NA		NA		NA		NA		NA		NA		NA		NA		NA		NA		NA		NA		NA		NA		NA		NA
					NA		NA		NA		NA		NA		NA		NA		NA		NA		NA		NA		NA		NA		NA		NA		NA		NA		NA		NA		NA		NA		NA		NA
					NA		NA		NA		NA		NA		NA		NA		NA		NA		NA		NA		NA		NA		NA		NA		NA		NA		NA		NA		NA		NA		NA		NA
					NA		NA		NA		NA		NA		NA		NA		NA		NA		NA		NA		NA		NA		NA		NA		NA		NA		NA		NA		NA		NA		NA		NA
					NA		NA		NA		NA		NA		NA		NA		NA		NA		NA		NA		NA		NA		NA		NA		NA		NA		NA		NA		NA		NA		NA		NA
					NA		NA		NA		NA		NA		NA		NA		NA		NA		NA		NA		NA		NA		NA		NA		NA		NA		NA		NA		NA		NA		NA		NA
					NA		NA		NA		NA		NA		NA		NA		NA		NA		NA		NA		NA		NA		NA		NA		NA		NA		NA		NA		NA		NA		NA		NA
					NA		NA		NA		NA		NA		NA		NA		NA		NA		NA		NA		NA		NA		NA		NA		NA		NA		NA		NA		NA		NA		NA		NA
					NA		NA		NA		NA		NA		NA		NA		NA		NA		NA		NA		NA		NA		NA		NA		NA		NA		NA		NA		NA		NA		NA		NA
					NA		NA		NA		NA		NA		NA		NA		NA		NA		NA		NA		NA		NA		NA		NA		NA		NA		NA		NA		NA		NA		NA		NA
					NA		NA		NA		NA		NA		NA		NA		NA		NA		NA		NA		NA		NA		NA		NA		NA		NA		NA		NA		NA		NA		NA		NA
					NA		NA		NA		NA		NA		NA		NA		NA		NA		NA		NA		NA		NA		NA		NA		NA		NA		NA		NA		NA		NA		NA		NA
					NA		NA		NA		NA		NA		NA		NA		NA		NA		NA		NA		NA		NA		NA		NA		NA		NA		NA		NA		NA		NA		NA		NA
					NA		NA		NA		NA		NA		NA		NA		NA		NA		NA		NA		NA		NA		NA		NA		NA		NA		NA		NA		NA		NA		NA		NA
					NA		NA		NA		NA		NA		NA		NA		NA		NA		NA		NA		NA		NA		NA		NA		NA		NA		NA		NA		NA		NA		NA		NA
					NA		NA		NA		NA		NA		NA		NA		NA		NA		NA		NA		NA		NA		NA		NA		NA		NA		NA		NA		NA		NA		NA		NA
					NA		NA		NA		NA		NA		NA		NA		NA		NA		NA		NA		NA		NA		NA		NA		NA		NA		NA		NA		NA		NA		NA		NA
					NA		NA		NA		NA		NA		NA		NA		NA		NA		NA		NA		NA		NA		NA		NA		NA		NA		NA		NA		NA		NA		NA		NA
					NA		NA		NA		NA		NA		NA		NA		NA		NA		NA		NA		NA		NA		NA		NA		NA		NA		NA		NA		NA		NA		NA		NA
					NA		NA		NA		NA		NA		NA		NA		NA		NA		NA		NA		NA		NA		NA		NA		NA		NA		NA		NA		NA		NA		NA		NA
					NA		NA		NA		NA		NA		NA		NA		NA		NA		NA		NA		NA		NA		NA		NA		NA		NA		NA		NA		NA		NA		NA		NA
					NA		NA		NA		NA		NA		NA		NA		NA		NA		NA		NA		NA		NA		NA		NA		NA		NA		NA		NA		NA		NA		NA		NA
					NA		NA		NA		NA		NA		NA		NA		NA		NA		NA		NA		NA		NA		NA		NA		NA		NA		NA		NA		NA		NA		NA		NA
					NA		NA		NA		NA		NA		NA		NA		NA		NA		NA		NA		NA		NA		NA		NA		NA		NA		NA		NA		NA		NA		NA		NA
					NA		NA		NA		NA		NA		NA		NA		NA		NA		NA		NA		NA		NA		NA		NA		NA		NA		NA		NA		NA		NA		NA		NA
					NA		NA		NA		NA		NA		NA		NA		NA		NA		NA		NA		NA		NA		NA		NA		NA		NA		NA		NA		NA		NA		NA		NA
					NA		NA		NA		NA		NA		NA		NA		NA		NA		NA		NA		NA		NA		NA		NA		NA		NA		NA		NA		NA		NA		NA		NA
					NA		NA		NA		NA		NA		NA		NA		NA		NA		NA		NA		NA		NA		NA		NA		NA		NA		NA		NA		NA		NA		NA		NA
					NA		NA		NA		NA		NA		NA		NA		NA		NA		NA		NA		NA		NA		NA		NA		NA		NA		NA		NA		NA		NA		NA		NA
					NA		NA		NA		NA		NA		NA		NA		NA		NA		NA		NA		NA		NA		NA		NA		NA		NA		NA		NA		NA		NA		NA		NA
					NA		NA		NA		NA		NA		NA		NA		NA		NA		NA		NA		NA		NA		NA		NA		NA		NA		NA		NA		NA		NA		NA		NA
					NA		NA		NA		NA		NA		NA		NA		NA		NA		NA		NA		NA		NA		NA		NA		NA		NA		NA		NA		NA		NA		NA		NA
					NA		NA		NA		NA		NA		NA		NA		NA		NA		NA		NA		NA		NA		NA		NA		NA		NA		NA		NA		NA		NA		NA		NA
					NA		NA		NA		NA		NA		NA		NA		NA		NA		NA		NA		NA		NA		NA		NA		NA		NA		NA		NA		NA		NA		NA		NA
					NA		NA		NA		NA		NA		NA		NA		NA		NA		NA		NA		NA		NA		NA		NA		NA		NA		NA		NA		NA		NA		NA		NA
					NA		NA		NA		NA		NA		NA		NA		NA		NA		NA		NA		NA		NA		NA		NA		NA		NA		NA		NA		NA		NA		NA		NA
					NA		NA		NA		NA		NA		NA		NA		NA		NA		NA		NA		NA		NA		NA		NA		NA		NA		NA		NA		NA		NA		NA		NA
					NA		NA		NA		NA		NA		NA		NA		NA		NA		NA		NA		NA		NA		NA		NA		NA		NA		NA		NA		NA		NA		NA		NA
					NA		NA		NA		NA		NA		NA		NA		NA		NA		NA		NA		NA		NA		NA		NA		NA		NA		NA		NA		NA		NA		NA		NA
					NA		NA		NA		NA		NA		NA		NA		NA		NA		NA		NA		NA		NA		NA		NA		NA		NA		NA		NA		NA		NA		NA		NA
					NA		NA		NA		NA		NA		NA		NA		NA		NA		NA		NA		NA		NA		NA		NA		NA		NA		NA		NA		NA		NA		NA		NA
					NA		NA		NA		NA		NA		NA		NA		NA		NA		NA		NA		NA		NA		NA		NA		NA		NA		NA		NA		NA		NA		NA		NA
					NA		NA		NA		NA		NA		NA		NA		NA		NA		NA		NA		NA		NA		NA		NA		NA		NA		NA		NA		NA		NA		NA		NA
					NA		NA		NA		NA		NA		NA		NA		NA		NA		NA		NA		NA		NA		NA		NA		NA		NA		NA		NA		NA		NA		NA		NA
					NA		NA		NA		NA		NA		NA		NA		NA		NA		NA		NA		NA		NA		NA		NA		NA		NA		NA		NA		NA		NA		NA		NA
					NA		NA		NA		NA		NA		NA		NA		NA		NA		NA		NA		NA		NA		NA		NA		NA		NA		NA		NA		NA		NA		NA		NA
					NA		NA		NA		NA		NA		NA		NA		NA		NA		NA		NA		NA		NA		NA		NA		NA		NA		NA		NA		NA		NA		NA		NA
					NA		NA		NA		NA		NA		NA		NA		NA		NA		NA		NA		NA		NA		NA		NA		NA		NA		NA		NA		NA		NA		NA		NA
					NA		NA		NA		NA		NA		NA		NA		NA		NA		NA		NA		NA		NA		NA		NA		NA		NA		NA		NA		NA		NA		NA		NA
					NA		NA		NA		NA		NA		NA		NA		NA		NA		NA		NA		NA		NA		NA		NA		NA		NA		NA		NA		NA		NA		NA		NA
					NA		NA		NA		NA		NA		NA		NA		NA		NA		NA		NA		NA		NA		NA		NA		NA		NA		NA		NA		NA		NA		NA		NA
					NA		NA		NA		NA		NA		NA		NA		NA		NA		NA		NA		NA		NA		NA		NA		NA		NA		NA		NA		NA		NA		NA		NA
					NA		NA		NA		NA		NA		NA		NA		NA		NA		NA		NA		NA		NA		NA		NA		NA		NA		NA		NA		NA		NA		NA		NA
					NA		NA		NA		NA		NA		NA		NA		NA		NA		NA		NA		NA		NA		NA		NA		NA		NA		NA		NA		NA		NA		NA		NA
					NA		NA		NA		NA		NA		NA		NA		NA		NA		NA		NA		NA		NA		NA		NA		NA		NA		NA		NA		NA		NA		NA		NA
					NA		NA		NA		NA		NA		NA		NA		NA		NA		NA		NA		NA		NA		NA		NA		NA		NA		NA		NA		NA		NA		NA		NA
					NA		NA		NA		NA		NA		NA		NA		NA		NA		NA		NA		NA		NA		NA		NA		NA		NA		NA		NA		NA		NA		NA		NA
					NA		NA		NA		NA		NA		NA		NA		NA		NA		NA		NA		NA		NA		NA		NA		NA		NA		NA		NA		NA		NA		NA		NA
					NA		NA		NA		NA		NA		NA		NA		NA		NA		NA		NA		NA		NA		NA		NA		NA		NA		NA		NA		NA		NA		NA		NA
					NA		NA		NA		NA		NA		NA		NA		NA		NA		NA		NA		NA		NA		NA		NA		NA		NA		NA		NA		NA		NA		NA		NA
					NA		NA		NA		NA		NA		NA		NA		NA		NA		NA		NA		NA		NA		NA		NA		NA		NA		NA		NA		NA		NA		NA		NA
					NA		NA		NA		NA		NA		NA		NA		NA		NA		NA		NA		NA		NA		NA		NA		NA		NA		NA		NA		NA		NA		NA		NA
					NA		NA		NA		NA		NA		NA		NA		NA		NA		NA		NA		NA		NA		NA		NA		NA		NA		NA		NA		NA		NA		NA		NA
					NA		NA		NA		NA		NA		NA		NA		NA		NA		NA		NA		NA		NA		NA		NA		NA		NA		NA		NA		NA		NA		NA		NA
					NA		NA		NA		NA		NA		NA		NA		NA		NA		NA		NA		NA		NA		NA		NA		NA		NA		NA		NA		NA		NA		NA		NA
					NA		NA		NA		NA		NA		NA		NA		NA		NA		NA		NA		NA		NA		NA		NA		NA		NA		NA		NA		NA		NA		NA		NA
					NA		NA		NA		NA		NA		NA		NA		NA		NA		NA		NA		NA		NA		NA		NA		NA		NA		NA		NA		NA		NA		NA		NA
					NA		NA		NA		NA		NA		NA		NA		NA		NA		NA		NA		NA		NA		NA		NA		NA		NA		NA		NA		NA		NA		NA		NA
					NA		NA		NA		NA		NA		NA		NA		NA		NA		NA		NA		NA		NA		NA		NA		NA		NA		NA		NA		NA		NA		NA		NA
					NA		NA		NA		NA		NA		NA		NA		NA		NA		NA		NA		NA		NA		NA		NA		NA		NA		NA		NA		NA		NA		NA		NA
					NA		NA		NA		NA		NA		NA		NA		NA		NA		NA		NA		NA		NA		NA		NA		NA		NA		NA		NA		NA		NA		NA		NA
					NA		NA		NA		NA		NA		NA		NA		NA		NA		NA		NA		NA		NA		NA		NA		NA		NA		NA		NA		NA		NA		NA		NA
					NA		NA		NA		NA		NA		NA		NA		NA		NA		NA		NA		NA		NA		NA		NA		NA		NA		NA		NA		NA		NA		NA		NA
					NA		NA		NA		NA		NA		NA		NA		NA		NA		NA		NA		NA		NA		NA		NA		NA		NA		NA		NA		NA		NA		NA		NA
					NA		NA		NA		NA		NA		NA		NA		NA		NA		NA		NA		NA		NA		NA		NA		NA		NA		NA		NA		NA		NA		NA		NA
					NA		NA		NA		NA		NA		NA		NA		NA		NA		NA		NA		NA		NA		NA		NA		NA		NA		NA		NA		NA		NA		NA		NA
					NA		NA		NA		NA		NA		NA		NA		NA		NA		NA		NA		NA		NA		NA		NA		NA		NA		NA		NA		NA		NA		NA		NA
					NA		NA		NA		NA		NA		NA		NA		NA		NA		NA		NA		NA		NA		NA		NA		NA		NA		NA		NA		NA		NA		NA		NA
					NA		NA		NA		NA		NA		NA		NA		NA		NA		NA		NA		NA		NA		NA		NA		NA		NA		NA		NA		NA		NA		NA		NA
					NA		NA		NA		NA		NA		NA		NA		NA		NA		NA		NA		NA		NA		NA		NA		NA		NA		NA		NA		NA		NA		NA		NA
					NA		NA		NA		NA		NA		NA		NA		NA		NA		NA		NA		NA		NA		NA		NA		NA		NA		NA		NA		NA		NA		NA		NA
					NA		NA		NA		NA		NA		NA		NA		NA		NA		NA		NA		NA		NA		NA		NA		NA		NA		NA		NA		NA		NA		NA		NA
					NA		NA		NA		NA		NA		NA		NA		NA		NA		NA		NA		NA		NA		NA		NA		NA		NA		NA		NA		NA		NA		NA		NA
					NA		NA		NA		NA		NA		NA		NA		NA		NA		NA		NA		NA		NA		NA		NA		NA		NA		NA		NA		NA		NA		NA		NA
					NA		NA		NA		NA		NA		NA		NA		NA		NA		NA		NA		NA		NA		NA		NA		NA		NA		NA		NA		NA		NA		NA		NA
					NA		NA		NA		NA		NA		NA		NA		NA		NA		NA		NA		NA		NA		NA		NA		NA		NA		NA		NA		NA		NA		NA		NA
					NA		NA		NA		NA		NA		NA		NA		NA		NA		NA		NA		NA		NA		NA		NA		NA		NA		NA		NA		NA		NA		NA		NA
					NA		NA		NA		NA		NA		NA		NA		NA		NA		NA		NA		NA		NA		NA		NA		NA		NA		NA		NA		NA		NA		NA		NA
					NA		NA		NA		NA		NA		NA		NA		NA		NA		NA		NA		NA		NA		NA		NA		NA		NA		NA		NA		NA		NA		NA		NA
					NA		NA		NA		NA		NA		NA		NA		NA		NA		NA		NA		NA		NA		NA		NA		NA		NA		NA		NA		NA		NA		NA		NA
					NA		NA		NA		NA		NA		NA		NA		NA		NA		NA		NA		NA		NA		NA		NA		NA		NA		NA		NA		NA		NA		NA		NA
					NA		NA		NA		NA		NA		NA		NA		NA		NA		NA		NA		NA		NA		NA		NA		NA		NA		NA		NA		NA		NA		NA		NA
					NA		NA		NA		NA		NA		NA		NA		NA		NA		NA		NA		NA		NA		NA		NA		NA		NA		NA		NA		NA		NA		NA		NA
					NA		NA		NA		NA		NA		NA		NA		NA		NA		NA		NA		NA		NA		NA		NA		NA		NA		NA		NA		NA		NA		NA		NA
					NA		NA		NA		NA		NA		NA		NA		NA		NA		NA		NA		NA		NA		NA		NA		NA		NA		NA		NA		NA		NA		NA		NA
					NA		NA		NA		NA		NA		NA		NA		NA		NA		NA		NA		NA		NA		NA		NA		NA		NA		NA		NA		NA		NA		NA		NA
					NA		NA		NA		NA		NA		NA		NA		NA		NA		NA		NA		NA		NA		NA		NA		NA		NA		NA		NA		NA		NA		NA		NA
					NA		NA		NA		NA		NA		NA		NA		NA		NA		NA		NA		NA		NA		NA		NA		NA		NA		NA		NA		NA		NA		NA		NA
					NA		NA		NA		NA		NA		NA		NA		NA		NA		NA		NA		NA		NA		NA		NA		NA		NA		NA		NA		NA		NA		NA		NA
					NA		NA		NA		NA		NA		NA		NA		NA		NA		NA		NA		NA		NA		NA		NA		NA		NA		NA		NA		NA		NA		NA		NA
					NA		NA		NA		NA		NA		NA		NA		NA		NA		NA		NA		NA		NA		NA		NA		NA		NA		NA		NA		NA		NA		NA		NA
					NA		NA		NA		NA		NA		NA		NA		NA		NA		NA		NA		NA		NA		NA		NA		NA		NA		NA		NA		NA		NA		NA		NA
					NA		NA		NA		NA		NA		NA		NA		NA		NA		NA		NA		NA		NA		NA		NA		NA		NA		NA		NA		NA		NA		NA		NA
					NA		NA		NA		NA		NA		NA		NA		NA		NA		NA		NA		NA		NA		NA		NA		NA		NA		NA		NA		NA		NA		NA		NA
					NA		NA		NA		NA		NA		NA		NA		NA		NA		NA		NA		NA		NA		NA		NA		NA		NA		NA		NA		NA		NA		NA		NA
					NA		NA		NA		NA		NA		NA		NA		NA		NA		NA		NA		NA		NA		NA		NA		NA		NA		NA		NA		NA		NA		NA		NA
					NA		NA		NA		NA		NA		NA		NA		NA		NA		NA		NA		NA		NA		NA		NA		NA		NA		NA		NA		NA		NA		NA		NA
					NA		NA		NA		NA		NA		NA		NA		NA		NA		NA		NA		NA		NA		NA		NA		NA		NA		NA		NA		NA		NA		NA		NA
					NA		NA		NA		NA		NA		NA		NA		NA		NA		NA		NA		NA		NA		NA		NA		NA		NA		NA		NA		NA		NA		NA		NA
					NA		NA		NA		NA		NA		NA		NA		NA		NA		NA		NA		NA		NA		NA		NA		NA		NA		NA		NA		NA		NA		NA		NA
					NA		NA		NA		NA		NA		NA		NA		NA		NA		NA		NA		NA		NA		NA		NA		NA		NA		NA		NA		NA		NA		NA		NA
					NA		NA		NA		NA		NA		NA		NA		NA		NA		NA		NA		NA		NA		NA		NA		NA		NA		NA		NA		NA		NA		NA		NA
					NA		NA		NA		NA		NA		NA		NA		NA		NA		NA		NA		NA		NA		NA		NA		NA		NA		NA		NA		NA		NA		NA		NA
					NA		NA		NA		NA		NA		NA		NA		NA		NA		NA		NA		NA		NA		NA		NA		NA		NA		NA		NA		NA		NA		NA		NA
					NA		NA		NA		NA		NA		NA		NA		NA		NA		NA		NA		NA		NA		NA		NA		NA		NA		NA		NA		NA		NA		NA		NA
					NA		NA		NA		NA		NA		NA		NA		NA		NA		NA		NA		NA		NA		NA		NA		NA		NA		NA		NA		NA		NA		NA		NA
					NA		NA		NA		NA		NA		NA		NA		NA		NA		NA		NA		NA		NA		NA		NA		NA		NA		NA		NA		NA		NA		NA		NA
					NA		NA		NA		NA		NA		NA		NA		NA		NA		NA		NA		NA		NA		NA		NA		NA		NA		NA		NA		NA		NA		NA		NA
					NA		NA		NA		NA		NA		NA		NA		NA		NA		NA		NA		NA		NA		NA		NA		NA		NA		NA		NA		NA		NA		NA		NA
					NA		NA		NA		NA		NA		NA		NA		NA		NA		NA		NA		NA		NA		NA		NA		NA		NA		NA		NA		NA		NA		NA		NA
					NA		NA		NA		NA		NA		NA		NA		NA		NA		NA		NA		NA		NA		NA		NA		NA		NA		NA		NA		NA		NA		NA		NA
					NA		NA		NA		NA		NA		NA		NA		NA		NA		NA		NA		NA		NA		NA		NA		NA		NA		NA		NA		NA		NA		NA		NA
					NA		NA		NA		NA		NA		NA		NA		NA		NA		NA		NA		NA		NA		NA		NA		NA		NA		NA		NA		NA		NA		NA		NA
					NA		NA		NA		NA		NA		NA		NA		NA		NA		NA		NA		NA		NA		NA		NA		NA		NA		NA		NA		NA		NA		NA		NA
					NA		NA		NA		NA		NA		NA		NA		NA		NA		NA		NA		NA		NA		NA		NA		NA		NA		NA		NA		NA		NA		NA		NA
					NA		NA		NA		NA		NA		NA		NA		NA		NA		NA		NA		NA		NA		NA		NA		NA		NA		NA		NA		NA		NA		NA		NA
					NA		NA		NA		NA		NA		NA		NA		NA		NA		NA		NA		NA		NA		NA		NA		NA		NA		NA		NA		NA		NA		NA		NA
					NA		NA		NA		NA		NA		NA		NA		NA		NA		NA		NA		NA		NA		NA		NA		NA		NA		NA		NA		NA		NA		NA		NA
					NA		NA		NA		NA		NA		NA		NA		NA		NA		NA		NA		NA		NA		NA		NA		NA		NA		NA		NA		NA		NA		NA		NA
					NA		NA		NA		NA		NA		NA		NA		NA		NA		NA		NA		NA		NA		NA		NA		NA		NA		NA		NA		NA		NA		NA		NA
					NA		NA		NA		NA		NA		NA		NA		NA		NA		NA		NA		NA		NA		NA		NA		NA		NA		NA		NA		NA		NA		NA		NA
					NA		NA		NA		NA		NA		NA		NA		NA		NA		NA		NA		NA		NA		NA		NA		NA		NA		NA		NA		NA		NA		NA		NA
					NA		NA		NA		NA		NA		NA		NA		NA		NA		NA		NA		NA		NA		NA		NA		NA		NA		NA		NA		NA		NA		NA		NA
					NA		NA		NA		NA		NA		NA		NA		NA		NA		NA		NA		NA		NA		NA		NA		NA		NA		NA		NA		NA		NA		NA		NA
					NA		NA		NA		NA		NA		NA		NA		NA		NA		NA		NA		NA		NA		NA		NA		NA		NA		NA		NA		NA		NA		NA		NA
					NA		NA		NA		NA		NA		NA		NA		NA		NA		NA		NA		NA		NA		NA		NA		NA		NA		NA		NA		NA		NA		NA		NA
					NA		NA		NA		NA		NA		NA		NA		NA		NA		NA		NA		NA		NA		NA		NA		NA		NA		NA		NA		NA		NA		NA		NA
					NA		NA		NA		NA		NA		NA		NA		NA		NA		NA		NA		NA		NA		NA		NA		NA		NA		NA		NA		NA		NA		NA		NA
					NA		NA		NA		NA		NA		NA		NA		NA		NA		NA		NA		NA		NA		NA		NA		NA		NA		NA		NA		NA		NA		NA		NA
					NA		NA		NA		NA		NA		NA		NA		NA		NA		NA		NA		NA		NA		NA		NA		NA		NA		NA		NA		NA		NA		NA		NA
					NA		NA		NA		NA		NA		NA		NA		NA		NA		NA		NA		NA		NA		NA		NA		NA		NA		NA		NA		NA		NA		NA		NA
					NA		NA		NA		NA		NA		NA		NA		NA		NA		NA		NA		NA		NA		NA		NA		NA		NA		NA		NA		NA		NA		NA		NA
					NA		NA		NA		NA		NA		NA		NA		NA		NA		NA		NA		NA		NA		NA		NA		NA		NA		NA		NA		NA		NA		NA		NA
					NA		NA		NA		NA		NA		NA		NA		NA		NA		NA		NA		NA		NA		NA		NA		NA		NA		NA		NA		NA		NA		NA		NA
					NA		NA		NA		NA		NA		NA		NA		NA		NA		NA		NA		NA		NA		NA		NA		NA		NA		NA		NA		NA		NA		NA		NA
					NA		NA		NA		NA		NA		NA		NA		NA		NA		NA		NA		NA		NA		NA		NA		NA		NA		NA		NA		NA		NA		NA		NA
					NA		NA		NA		NA		NA		NA		NA		NA		NA		NA		NA		NA		NA		NA		NA		NA		NA		NA		NA		NA		NA		NA		NA
					NA		NA		NA		NA		NA		NA		NA		NA		NA		NA		NA		NA		NA		NA		NA		NA		NA		NA		NA		NA		NA		NA		NA
					NA		NA		NA		NA		NA		NA		NA		NA		NA		NA		NA		NA		NA		NA		NA		NA		NA		NA		NA		NA		NA		NA		NA
					NA		NA		NA		NA		NA		NA		NA		NA		NA		NA		NA		NA		NA		NA		NA		NA		NA		NA		NA		NA		NA		NA		NA
					NA		NA		NA		NA		NA		NA		NA		NA		NA		NA		NA		NA		NA		NA		NA		NA		NA		NA		NA		NA		NA		NA		NA
					NA		NA		NA		NA		NA		NA		NA		NA		NA		NA		NA		NA		NA		NA		NA		NA		NA		NA		NA		NA		NA		NA		NA
					NA		NA		NA		NA		NA		NA		NA		NA		NA		NA		NA		NA		NA		NA		NA		NA		NA		NA		NA		NA		NA		NA		NA
					NA		NA		NA		NA		NA		NA		NA		NA		NA		NA		NA		NA		NA		NA		NA		NA		NA		NA		NA		NA		NA		NA		NA
					NA		NA		NA		NA		NA		NA		NA		NA		NA		NA		NA		NA		NA		NA		NA		NA		NA		NA		NA		NA		NA		NA		NA
					NA		NA		NA		NA		NA		NA		NA		NA		NA		NA		NA		NA		NA		NA		NA		NA		NA		NA		NA		NA		NA		NA		NA
					NA		NA		NA		NA		NA		NA		NA		NA		NA		NA		NA		NA		NA		NA		NA		NA		NA		NA		NA		NA		NA		NA		NA
					NA		NA		NA		NA		NA		NA		NA		NA		NA		NA		NA		NA		NA		NA		NA		NA		NA		NA		NA		NA		NA		NA		NA
					NA		NA		NA		NA		NA		NA		NA		NA		NA		NA		NA		NA		NA		NA		NA		NA		NA		NA		NA		NA		NA		NA		NA
					NA		NA		NA		NA		NA		NA		NA		NA		NA		NA		NA		NA		NA		NA		NA		NA		NA		NA		NA		NA		NA		NA		NA
					NA		NA		NA		NA		NA		NA		NA		NA		NA		NA		NA		NA		NA		NA		NA		NA		NA		NA		NA		NA		NA		NA		NA
					NA		NA		NA		NA		NA		NA		NA		NA		NA		NA		NA		NA		NA		NA		NA		NA		NA		NA		NA		NA		NA		NA		NA
					NA		NA		NA		NA		NA		NA		NA		NA		NA		NA		NA		NA		NA		NA		NA		NA		NA		NA		NA		NA		NA		NA		NA
					NA		NA		NA		NA		NA		NA		NA		NA		NA		NA		NA		NA		NA		NA		NA		NA		NA		NA		NA		NA		NA		NA		NA
					NA		NA		NA		NA		NA		NA		NA		NA		NA		NA		NA		NA		NA		NA		NA		NA		NA		NA		NA		NA		NA		NA		NA
					NA		NA		NA		NA		NA		NA		NA		NA		NA		NA		NA		NA		NA		NA		NA		NA		NA		NA		NA		NA		NA		NA		NA
					NA		NA		NA		NA		NA		NA		NA		NA		NA		NA		NA		NA		NA		NA		NA		NA		NA		NA		NA		NA		NA		NA		NA
					NA		NA		NA		NA		NA		NA		NA		NA		NA		NA		NA		NA		NA		NA		NA		NA		NA		NA		NA		NA		NA		NA		NA
					NA		NA		NA		NA		NA		NA		NA		NA		NA		NA		NA		NA		NA		NA		NA		NA		NA		NA		NA		NA		NA		NA		NA
					NA		NA		NA		NA		NA		NA		NA		NA		NA		NA		NA		NA		NA		NA		NA		NA		NA		NA		NA		NA		NA		NA		NA
					NA		NA		NA		NA		NA		NA		NA		NA		NA		NA		NA		NA		NA		NA		NA		NA		NA		NA		NA		NA		NA		NA		NA
					NA		NA		NA		NA		NA		NA		NA		NA		NA		NA		NA		NA		NA		NA		NA		NA		NA		NA		NA		NA		NA		NA		NA
					NA		NA		NA		NA		NA		NA		NA		NA		NA		NA		NA		NA		NA		NA		NA		NA		NA		NA		NA		NA		NA		NA		NA
					NA		NA		NA		NA		NA		NA		NA		NA		NA		NA		NA		NA		NA		NA		NA		NA		NA		NA		NA		NA		NA		NA		NA
					NA		NA		NA		NA		NA		NA		NA		NA		NA		NA		NA		NA		NA		NA		NA		NA		NA		NA		NA		NA		NA		NA		NA
					NA		NA		NA		NA		NA		NA		NA		NA		NA		NA		NA		NA		NA		NA		NA		NA		NA		NA		NA		NA		NA		NA		NA
					NA		NA		NA		NA		NA		NA		NA		NA		NA		NA		NA		NA		NA		NA		NA		NA		NA		NA		NA		NA		NA		NA		NA
					NA		NA		NA		NA		NA		NA		NA		NA		NA		NA		NA		NA		NA		NA		NA		NA		NA		NA		NA		NA		NA		NA		NA
					NA		NA		NA		NA		NA		NA		NA		NA		NA		NA		NA		NA		NA		NA		NA		NA		NA		NA		NA		NA		NA		NA		NA
					NA		NA		NA		NA		NA		NA		NA		NA		NA		NA		NA		NA		NA		NA		NA		NA		NA		NA		NA		NA		NA		NA		NA
					NA		NA		NA		NA		NA		NA		NA		NA		NA		NA		NA		NA		NA		NA		NA		NA		NA		NA		NA		NA		NA		NA		NA
					NA		NA		NA		NA		NA		NA		NA		NA		NA		NA		NA		NA		NA		NA		NA		NA		NA		NA		NA		NA		NA		NA		NA
					NA		NA		NA		NA		NA		NA		NA		NA		NA		NA		NA		NA		NA		NA		NA		NA		NA		NA		NA		NA		NA		NA		NA
					NA		NA		NA		NA		NA		NA		NA		NA		NA		NA		NA		NA		NA		NA		NA		NA		NA		NA		NA		NA		NA		NA		NA
					NA		NA		NA		NA		NA		NA		NA		NA		NA		NA		NA		NA		NA		NA		NA		NA		NA		NA		NA		NA		NA		NA		NA
					NA		NA		NA		NA		NA		NA		NA		NA		NA		NA		NA		NA		NA		NA		NA		NA		NA		NA		NA		NA		NA		NA		NA
					NA		NA		NA		NA		NA		NA		NA		NA		NA		NA		NA		NA		NA		NA		NA		NA		NA		NA		NA		NA		NA		NA		NA
					NA		NA		NA		NA		NA		NA		NA		NA		NA		NA		NA		NA		NA		NA		NA		NA		NA		NA		NA		NA		NA		NA		NA
					NA		NA		NA		NA		NA		NA		NA		NA		NA		NA		NA		NA		NA		NA		NA		NA		NA		NA		NA		NA		NA		NA		NA
					NA		NA		NA		NA		NA		NA		NA		NA		NA		NA		NA		NA		NA		NA		NA		NA		NA		NA		NA		NA		NA		NA		NA
					NA		NA		NA		NA		NA		NA		NA		NA		NA		NA		NA		NA		NA		NA		NA		NA		NA		NA		NA		NA		NA		NA		NA
					NA		NA		NA		NA		NA		NA		NA		NA		NA		NA		NA		NA		NA		NA		NA		NA		NA		NA		NA		NA		NA		NA		NA
					NA		NA		NA		NA		NA		NA		NA		NA		NA		NA		NA		NA		NA		NA		NA		NA		NA		NA		NA		NA		NA		NA		NA
					NA		NA		NA		NA		NA		NA		NA		NA		NA		NA		NA		NA		NA		NA		NA		NA		NA		NA		NA		NA		NA		NA		NA
					NA		NA		NA		NA		NA		NA		NA		NA		NA		NA		NA		NA		NA		NA		NA		NA		NA		NA		NA		NA		NA		NA		NA
					NA		NA		NA		NA		NA		NA		NA		NA		NA		NA		NA		NA		NA		NA		NA		NA		NA		NA		NA		NA		NA		NA		NA
					NA		NA		NA		NA		NA		NA		NA		NA		NA		NA		NA		NA		NA		NA		NA		NA		NA		NA		NA		NA		NA		NA		NA
					NA		NA		NA		NA		NA		NA		NA		NA		NA		NA		NA		NA		NA		NA		NA		NA		NA		NA		NA		NA		NA		NA		NA
					NA		NA		NA		NA		NA		NA		NA		NA		NA		NA		NA		NA		NA		NA		NA		NA		NA		NA		NA		NA		NA		NA		NA
					NA		NA		NA		NA		NA		NA		NA		NA		NA		NA		NA		NA		NA		NA		NA		NA		NA		NA		NA		NA		NA		NA		NA
					NA		NA		NA		NA		NA		NA		NA		NA		NA		NA		NA		NA		NA		NA		NA		NA		NA		NA		NA		NA		NA		NA		NA
					NA		NA		NA		NA		NA		NA		NA		NA		NA		NA		NA		NA		NA		NA		NA		NA		NA		NA		NA		NA		NA		NA		NA
					NA		NA		NA		NA		NA		NA		NA		NA		NA		NA		NA		NA		NA		NA		NA		NA		NA		NA		NA		NA		NA		NA		NA
					NA		NA		NA		NA		NA		NA		NA		NA		NA		NA		NA		NA		NA		NA		NA		NA		NA		NA		NA		NA		NA		NA		NA
					NA		NA		NA		NA		NA		NA		NA		NA		NA		NA		NA		NA		NA		NA		NA		NA		NA		NA		NA		NA		NA		NA		NA
					NA		NA		NA		NA		NA		NA		NA		NA		NA		NA		NA		NA		NA		NA		NA		NA		NA		NA		NA		NA		NA		NA		NA
					NA		NA		NA		NA		NA		NA		NA		NA		NA		NA		NA		NA		NA		NA		NA		NA		NA		NA		NA		NA		NA		NA		NA
					NA		NA		NA		NA		NA		NA		NA		NA		NA		NA		NA		NA		NA		NA		NA		NA		NA		NA		NA		NA		NA		NA		NA
					NA		NA		NA		NA		NA		NA		NA		NA		NA		NA		NA		NA		NA		NA		NA		NA		NA		NA		NA		NA		NA		NA		NA
					NA		NA		NA		NA		NA		NA		NA		NA		NA		NA		NA		NA		NA		NA		NA		NA		NA		NA		NA		NA		NA		NA		NA
					NA		NA		NA		NA		NA		NA		NA		NA		NA		NA		NA		NA		NA		NA		NA		NA		NA		NA		NA		NA		NA		NA		NA
					NA		NA		NA		NA		NA		NA		NA		NA		NA		NA		NA		NA		NA		NA		NA		NA		NA		NA		NA		NA		NA		NA		NA
					NA		NA		NA		NA		NA		NA		NA		NA		NA		NA		NA		NA		NA		NA		NA		NA		NA		NA		NA		NA		NA		NA		NA
					NA		NA		NA		NA		NA		NA		NA		NA		NA		NA		NA		NA		NA		NA		NA		NA		NA		NA		NA		NA		NA		NA		NA
					NA		NA		NA		NA		NA		NA		NA		NA		NA		NA		NA		NA		NA		NA		NA		NA		NA		NA		NA		NA		NA		NA		NA
					NA		NA		NA		NA		NA		NA		NA		NA		NA		NA		NA		NA		NA		NA		NA		NA		NA		NA		NA		NA		NA		NA		NA
					NA		NA		NA		NA		NA		NA		NA		NA		NA		NA		NA		NA		NA		NA		NA		NA		NA		NA		NA		NA		NA		NA		NA
					NA		NA		NA		NA		NA		NA		NA		NA		NA		NA		NA		NA		NA		NA		NA		NA		NA		NA		NA		NA		NA		NA		NA
					NA		NA		NA		NA		NA		NA		NA		NA		NA		NA		NA		NA		NA		NA		NA		NA		NA		NA		NA		NA		NA		NA		NA
					NA		NA		NA		NA		NA		NA		NA		NA		NA		NA		NA		NA		NA		NA		NA		NA		NA		NA		NA		NA		NA		NA		NA
					NA		NA		NA		NA		NA		NA		NA		NA		NA		NA		NA		NA		NA		NA		NA		NA		NA		NA		NA		NA		NA		NA		NA
					NA		NA		NA		NA		NA		NA		NA		NA		NA		NA		NA		NA		NA		NA		NA		NA		NA		NA		NA		NA		NA		NA		NA
					NA		NA		NA		NA		NA		NA		NA		NA		NA		NA		NA		NA		NA		NA		NA		NA		NA		NA		NA		NA		NA		NA		NA
					NA		NA		NA		NA		NA		NA		NA		NA		NA		NA		NA		NA		NA		NA		NA		NA		NA		NA		NA		NA		NA		NA		NA
					NA		NA		NA		NA		NA		NA		NA		NA		NA		NA		NA		NA		NA		NA		NA		NA		NA		NA		NA		NA		NA		NA		NA
					NA		NA		NA		NA		NA		NA		NA		NA		NA		NA		NA		NA		NA		NA		NA		NA		NA		NA		NA		NA		NA		NA		NA
					NA		NA		NA		NA		NA		NA		NA		NA		NA		NA		NA		NA		NA		NA		NA		NA		NA		NA		NA		NA		NA		NA		NA
					NA		NA		NA		NA		NA		NA		NA		NA		NA		NA		NA		NA		NA		NA		NA		NA		NA		NA		NA		NA		NA		NA		NA
					NA		NA		NA		NA		NA		NA		NA		NA		NA		NA		NA		NA		NA		NA		NA		NA		NA		NA		NA		NA		NA		NA		NA
					NA		NA		NA		NA		NA		NA		NA		NA		NA		NA		NA		NA		NA		NA		NA		NA		NA		NA		NA		NA		NA		NA		NA
					NA		NA		NA		NA		NA		NA		NA		NA		NA		NA		NA		NA		NA		NA		NA		NA		NA		NA		NA		NA		NA		NA		NA
					NA		NA		NA		NA		NA		NA		NA		NA		NA		NA		NA		NA		NA		NA		NA		NA		NA		NA		NA		NA		NA		NA		NA
					NA		NA		NA		NA		NA		NA		NA		NA		NA		NA		NA		NA		NA		NA		NA		NA		NA		NA		NA		NA		NA		NA		NA
					NA		NA		NA		NA		NA		NA		NA		NA		NA		NA		NA		NA		NA		NA		NA		NA		NA		NA		NA		NA		NA		NA		NA
					NA		NA		NA		NA		NA		NA		NA		NA		NA		NA		NA		NA		NA		NA		NA		NA		NA		NA		NA		NA		NA		NA		NA
					NA		NA		NA		NA		NA		NA		NA		NA		NA		NA		NA		NA		NA		NA		NA		NA		NA		NA		NA		NA		NA		NA		NA
					NA		NA		NA		NA		NA		NA		NA		NA		NA		NA		NA		NA		NA		NA		NA		NA		NA		NA		NA		NA		NA		NA		NA
					NA		NA		NA		NA		NA		NA		NA		NA		NA		NA		NA		NA		NA		NA		NA		NA		NA		NA		NA		NA		NA		NA		NA
					NA		NA		NA		NA		NA		NA		NA		NA		NA		NA		NA		NA		NA		NA		NA		NA		NA		NA		NA		NA		NA		NA		NA
					NA		NA		NA		NA		NA		NA		NA		NA		NA		NA		NA		NA		NA		NA		NA		NA		NA		NA		NA		NA		NA		NA		NA
					NA		NA		NA		NA		NA		NA		NA		NA		NA		NA		NA		NA		NA		NA		NA		NA		NA		NA		NA		NA		NA		NA		NA
					NA		NA		NA		NA		NA		NA		NA		NA		NA		NA		NA		NA		NA		NA		NA		NA		NA		NA		NA		NA		NA		NA		NA
					NA		NA		NA		NA		NA		NA		NA		NA		NA		NA		NA		NA		NA		NA		NA		NA		NA		NA		NA		NA		NA		NA		NA
					NA		NA		NA		NA		NA		NA		NA		NA		NA		NA		NA		NA		NA		NA		NA		NA		NA		NA		NA		NA		NA		NA		NA
					NA		NA		NA		NA		NA		NA		NA		NA		NA		NA		NA		NA		NA		NA		NA		NA		NA		NA		NA		NA		NA		NA		NA
					NA		NA		NA		NA		NA		NA		NA		NA		NA		NA		NA		NA		NA		NA		NA		NA		NA		NA		NA		NA		NA		NA		NA
					NA		NA		NA		NA		NA		NA		NA		NA		NA		NA		NA		NA		NA		NA		NA		NA		NA		NA		NA		NA		NA		NA		NA
					NA		NA		NA		NA		NA		NA		NA		NA		NA		NA		NA		NA		NA		NA		NA		NA		NA		NA		NA		NA		NA		NA		NA
					NA		NA		NA		NA		NA		NA		NA		NA		NA		NA		NA		NA		NA		NA		NA		NA		NA		NA		NA		NA		NA		NA		NA
					NA		NA		NA		NA		NA		NA		NA		NA		NA		NA		NA		NA		NA		NA		NA		NA		NA		NA		NA		NA		NA		NA		NA
[truncated: 1 more columns]

## Sheet: dm-aa-values
TIME	DIET	SYMBIOTIC_STATUS	group	sample_ID	COLONY_NAME	data_file	L_Alanine	L_Arginine	L_Asparagine	L_Aspartic Acid	L_Cysteine	L_Cystine	L_Glutamic acid	L_Glutamine	L_Glycine	L_Histidine	L_Isoleucine	L_Leucine	L_Lysine	L_Methionine	L_Phenylalanine	L_Proline	L_Serine	L_Threonine	Tryptamine	L_Tryptophane	Tyramine	L_Tyrosine	L_Valine
Week 6	Control	Symbiotic	WEEK 6_Ctrl_Symbiotic	1-26 CTRL CP2 MET	1-26 CTRL	met_1_ba4_01_56634.d.xms	0.30665	0.107273	0.275092	0.807411	0	0	0.702575	0.893009	0.642222	0.12921	0.0768436	0.179964	0.271168	0.440319	0.0688129	0.597376	0.182235	0.0497434	0	0.197518	0	2.53223	0.203919
Week 12	Control	Symbiotic	WEEK 12_Ctrl_Symbiotic	6-26 CTRL CP4 BII MET	6-26 CTRL BII	met_10_bb5_01_56643.d.xms	0.792288	0.311159	0.374885	0.854657	0	0	1.99079	3.10904	1.18275	0.347762	0.286184	0.734748	0.842086	1.57589	0.301423	1.40794	0.441919	0.413037	0	0.809415	0	8.50502	0.623759
Week 12	Control	Symbiotic	WEEK 12_Ctrl_Symbiotic	1-26 CTRL CP4 MET BII	1-26 CTRL BII	met_11_bb6_01_56648.d.xms	0.716521	0.281268	0.539597	0.848367	0.00561387	0	1.69957	2.82279	1.06776	0.349752	0.15817	0.366314	0.790934	1.00827	0.1889	1.62891	0.206252	0.153535	0	0.669788	0	5.17304	0.204713
Week 0	Low Protein	Symbiotic	WEEK 0_LP_Symbiotic	6-26 NP CP0 MET BIII	6-26 NP BIII	met_12_bb7_01_56649.d.xms	0.993103	0.455128	0.445335	0.850234	0.00640359	0	2.0587	3.26238	1.13147	0.208932	0.149705	0.302401	0.87952	1.14005	0.281763	2.18028	0.134148	0.300201	0	0.262909	0	4.5068	0.158007
Week 0	Low Protein	Aposymbiotic	WEEK 0_LP_Aposymbiotic	3-31 NP CP0 MET BIII	3-31 NP BIII	met_13_bb8_01_56650.d.xms	0.473466	0.173451	0.348691	0.674137	0	0	1.36628	1.48115	0	0.225677	0.157769	0.260536	0.320193	0.865436	0.209165	2.04707	0	0	0	0.291219	0	2.35245	0.398614
Week 12	Control	Aposymbiotic	WEEK 12_Ctrl_Aposymbiotic	5-31 CTRL CP4 MET BII	5-31 CTRL BII	met_14_bc1_01_56651.d.xms	0.782408	0.232495	0.518735	0.790226	0	0	1.92782	3.65402	0	0.320921	0.0994811	0.341025	0.77993	0.912689	0.219363	1.64525	0.122546	0.0111934	0	0.838047	0	5.78218	0.77174
Week 0	Low Protein	Aposymbiotic	WEEK 0_LP_Aposymbiotic	3-31 NP CP0 MET BIII	3-31 NP BIII	met_15_bc2_01_56652.d.xms	3.7321	0.354571	1.85873	0.38683	0	0	0.181587	0.222963	1.92712	0.0803379	0.164395	0.232248	0.117239	1.02797	0.0640323	0.749069	0.152097	0.0947353	0	0.131968	0	0.515899	0.341429
Week 0	Control	Aposymbiotic	WEEK 0_Ctrl_Aposymbiotic	3-31 CTRL CP0 MET BIII	3-31 CTRL BIII	met_16_bc3_01_56653.d.xms	0.636636	0.305565	0.28291	0.862226	0	0	1.35746	1.74603	1.25123	0.210945	0.132385	0.261189	0.53498	0.780541	0.185366	1.14748	0.557838	0.335057	0	0.183291	0	2.39231	0.193157
Week 6	Low Protein	Symbiotic	WEEK 6_LP_Symbiotic	1-26 LP CP2 MET	1-26 LP	met_17_bc4_01_56654.d.xms	0.505397	0.167722	0.367097	0.84221	0	0	1.36841	1.96106	0.649929	0.215967	0.104457	0.336774	0.582891	0.788481	0.171602	1.02041	0.20879	0.185559	0	0.358099	0	4.56259	0.319221
Week 12	Low Protein	Aposymbiotic	WEEK 12_LP_Aposymbiotic	5-31 LP CP4 MET BII	5-31 LP BII	met_18_bc5_01_56655.d.xms	0.739704	0.50063	0.53699	0.863408	0.0149528	0	1.88851	3.90851	1.54874	0.540473	0.331818	0.484748	1.09962	1.12489	0.281737	2.01628	0.298377	0.149242	0	0.605384	0	3.82941	0.558808
Week 0	Control	Symbiotic	WEEK 0_Ctrl_Symbiotic	6-26 CTRL CP0 MET BIII	6-26 CTRL BIII	met_19_bc6_01_56656.d.xms	0.790895	0.204246	0.464527	0.747322	0	0	1.66654	3.18616	0	0.328953	0.244289	0.484054	0.719159	0.801702	0.235059	1.42256	0.105733	0.102466	0	0.70273	0	4.42651	0.275086
Week 6	Control	Symbiotic	WEEK 6_Ctrl_Symbiotic	6-26 CTRL CP2 MET	6-26 CTRL	met_2_ba5_01_56635.d.xms	0.745372	0.262821	0.451761	0.83993	0	0	1.6519	3.11975	1.64324	0.283652	0.254879	0.402312	0.854045	0.748872	0.173851	1.20541	0.332024	0.206404	0	0.434283	0	3.45707	0.261253
Week 12	Low Protein	Symbiotic	WEEK 12_LP_Symbiotic	1-26 LP CP4 MET BII R1	1-26 LP BII	met_20_bc7_01_56657.d.xms	0.761442	0.438784	0.40071	0.838163	0	0	1.7826	2.87762	1.33963	0.176066	0.139025	0.453663	0.721946	1.77288	0.244857	1.82798	0.2412	0.252376	0	0.51572	0	5.10179	0.452635
Week 12	Low Protein	Symbiotic	WEEK 12_LP_Symbiotic	1-26 LP CP4 MET BII R2	1-26 LP BII	met_21_bc8_01_56661.d.xms	0.892026	0.571277	0.348549	0.850311	0.00827181	0	2.32738	2.87072	1.50131	0.394698	0.345173	0.803939	0.838044	2.12626	0.355167	1.66956	0.609724	0.225968	0	0.704342	0	7.59848	0.688433
Week 0	Low Protein	Aposymbiotic	WEEK 0_LP_Aposymbiotic	3-31 NP CP0 MET BIII	3-31 NP BIII	met_22_bd1_01_56662.d.xms	0.505908	0.284465	0.401673	0.856818	0	0	1.68047	1.88536	0.845735	0.265879	0.20938	0.301077	0.54198	0.931994	0.182055	1.24283	0.124304	0.0530005	0	0.373334	0	2.33042	0.350804
Week 6	NP	Symbiotic	WEEK 6_NP_Symbiotic	6-26 NP CP2 MET BIII	6-26 NP BIII	met_23_bd2_01_56663.d.xms	0.491913	0.120707	0.263089	0.831655	0	0	1.13825	1.46554	0.857628	0.179071	0.164837	0.383233	0.476089	1.09602	0.136306	0.925078	0.155475	0.146325	0	0.228205	0	2.51331	0.32326
Week 12	Low Protein	Aposymbiotic	WEEK 12_LP_Aposymbiotic	5-31 LP CP4 MET BII	5-31 LP BII	met_24_bd3_01_56664.d.xms	0.561476	0.239675	0.410496	0.860132	0.00786057	0	1.37331	2.10019	1.45135	0.153963	0.183721	0.311231	0.590305	0.870865	0.186839	1.39991	0.190203	0.363464	0	0.25296	0	2.95848	0.378247
Week 6	Control	Symbiotic	WEEK 6_Ctrl_Symbiotic	6-26 CTRL CP2 MET BIII	6-26 CTRL BIII	met_25_bd4_01_56665.d.xms	0.621832	0.267783	0.335375	0.858398	0.00804281	0	1.66306	2.18697	0.877623	0.250408	0.162931	0.32272	0.588127	0.573763	0.189395	1.20351	0.216545	0.438841	0	0.346651	0	4.46805	0.322542
Week 6	Low Protein	Aposymbiotic	WEEK 6_LP_Aposymbiotic	6-31 LP CP2 MET BII	6-31 LP BII	met_26_bd5_01_56666.d.xms	0.710169	0.30979	0.438747	0.854971	0	0	1.60937	3.25749	0	0.256157	0.299046	0.430542	0.804203	0.938367	0.227467	1.37638	0.195478	0.283318	0	0.412071	0	3.24462	0.448861
Week 0	Control	Symbiotic	WEEK 0_Ctrl_Symbiotic	3-26 CTRL CP0 MET	3-26 CTRL	met_27_bd6_01_56667.d.xms	0.947074	0.426723	0.510707	0.850479	0.0110675	0	2.02443	3.39156	1.19189	0.535112	0.284852	0.538129	1.08836	1.14015	0.317563	1.83739	0.716883	0.19619	0	0.820235	0	6.46503	0.492252
Week 0	Control	Symbiotic	WEEK 0_Ctrl_Symbiotic	5-26 CTRL MET CP0	5-26 CTRL	met_28_bd7_01_56668.d.xms	0.931589	0.406652	0.454825	0.8684	0.0267115	0	2.30741	3.91378	1.81616	0.467189	0.288716	0.554085	1.03729	1.54432	0.330802	1.87936	0.452667	0.349955	0	1.00133	0	5.8301	0.441854
Week 0	Low Protein	Aposymbiotic	WEEK 0_LP_Aposymbiotic	2-31 LP CP0 MET	2-31 LP	met_29_bd8_01_56669.d.xms	0.882494	0.321504	0.408089	0.87279	0.00715287	0	1.98553	3.51217	1.53039	0.44422	0.154354	0.508533	1.01554	1.27508	0.311632	1.46026	0.334169	0.302035	0	0.908296	0	7.20027	0.644208
Week 6	Control	Symbiotic	WEEK 6_Ctrl_Symbiotic	6-26 CTRL CP2 MET BIII	6-26 CTRL BIII	met_3_ba6_01_56636.d.xms	0.583659	0.227222	0.401946	0.831762	0.00729977	0	1.60867	2.43813	1.17458	0.151698	0.164343	0.435838	1.08055	0.853538	0.203332	1.07913	0.191126	0.258852	0	0.641612	0	5.54604	0.329347
Week 0	Control	Aposymbiotic	WEEK 0_Ctrl_Aposymbiotic	3-31 CTRL CP0 MET	3-31 CTRL	met_30_be1_01_56670.d.xms	0.626514	0.378598	0.375506	0.863209	0	0	1.697	1.68523	1.06239	0.461509	0.248344	0.382135	0.565186	0.881052	0.255853	1.28565	0.181306	0.0719986	0	0.80375	0	4.64661	0.261988
Week 0	Low Protein	Symbiotic	WEEK 0_LP_Symbiotic	1-26 LP CP0 MET	1-26 LP	met_31_be2_01_56674.d.xms	0.680495	0.313465	0.413443	0.856827	0.01147	0	1.82837	2.31762	0.721368	0.28225	0.229999	0.36282	1.3496	0.794039	0.193774	1.64	0.235299	0.180704	0	0.551727	0	4.65372	0.212943
Week 0	Control	Symbiotic	WEEK 0_Ctrl_Symbiotic	6-26 CTRL CP0 MET	6-26 CTRL	met_32_be3_01_56675.d.xms	0.617728	0.220145	0.252296	0.836328	0	0	1.62794	1.83995	1.32424	0.265046	0.20078	0.534175	0.848485	1.43317	0.284189	1.36142	0.266947	0.327493	0.00252548	0.724423	0	7.35385	0.52498
Week 0	Low Protein	Symbiotic	WEEK 0_LP_Symbiotic	3-26 NP CP0 MET	3-26 NP	met_33_be4_01_56676.d.xms	0.952638	0.551065	0.386857	0.882019	0	0.018971	2.40168	3.4293	1.69768	0.302507	0.277583	0.496148	1.814	1.209	0.297212	1.89144	0.559411	0.274848	0	0.415423	0	5.00455	0.334771
Week 0	Low Protein	Aposymbiotic	WEEK 0_LP_Aposymbiotic	3-31 NP CP0 MET	3-31 NP	met_34_be5_01_56677.d.xms	0.671654	0.495512	0.416073	0.870591	0.0183602	0.0228873	1.80324	2.29773	0.745141	0.486375	0.291864	0.422506	0.575211	1.00953	0.31428	1.58891	0.394234	0.250287	0	0.735841	0	5.86919	0.326889
Week 0	Low Protein	Aposymbiotic	WEEK 0_LP_Aposymbiotic	6-31 NP CP0 MET BII	6-31 NP BII	met_35_be6_01_56678.d.xms	0.573235	0.240218	0.404704	0.858052	0.014913	0	1.46547	2.31307	0.508945	0.217328	0.130619	0.309555	0.636155	0.822076	0.200424	1.3113	0.112678	0.116597	0	0.301113	0	3.57989	0.32921
Week 0	Low Protein	Symbiotic	WEEK 0_LP_Symbiotic	6-26 NP CP0 MET	6-26 NP	met_36_be7_01_56679.d.xms	0.48851	0.263455	0.335511	0.86225	0.0164902	0	1.46952	1.91106	0.900164	0.176118	0.0960486	0.318309	0.526186	0.927752	0.161059	1.06456	0.186237	0.375104	0	0.393799	0	5.31642	0.281396
Week 0	Low Protein	Aposymbiotic	WEEK 0_LP_Aposymbiotic	5-31 LP CP0 MET	5-31 LP	met_37_be8_01_56680.d.xms	0.674357	0.377824	0.507018	0.816169	0.0172164	0	1.61184	2.59216	1.10792	0.355623	0.213117	0.423655	0.758276	1.10996	0.365403	1.4447	0.264937	0.351585	0	1.11288	0	8.55535	0.529876
Week 6	NP	Symbiotic	WEEK 6_NP_Symbiotic	4-26 NP CP2 MET	4-26 NP	met_38_ga1_01_56681.d.xms	0.459699	0.286711	0.375946	0.846192	0.0213269	0	1.47668	2.15157	0.802174	0.188223	0.178411	0.340801	1.00694	1.00463	0.137163	1.08493	0.220881	0.28775	0	0.424984	0	3.5688	0.467205
Week 0	Control	Symbiotic	WEEK 0_Ctrl_Symbiotic	1-26 CTRL CP0 MET	1-26 CTRL	met_39_ga2_01_56682.d.xms	0.704438	0.319508	0.450643	0.85624	0.0138788	0	1.83392	2.98096	1.25431	0.292619	0.218866	0.453238	0.806833	1.13292	0.251752	1.38606	0.277564	0.192296	0	0.34444	0	5.45764	0.387984
Week 0	Low Protein	Aposymbiotic	WEEK 0_LP_Aposymbiotic	6-31 LP CP0 MET BIII	6-31 LP BIII	met_4_ba7_01_56637.d.xms	6.46382	0.757684	0.331584	0.850276	0.00657406	0	1.04637	1.86129	3.63174	0.248458	0.438166	0.678308	0.681515	2.83615	0.218236	3.68302	0.454264	0.462159	0	0.61449	0	3.39966	0.835925
Week 0	NP	Symbiotic	WEEK 0_NP_Symbiotic	4-26 NP CP2 MET	4-26 NP	met_40_ga3_01_56683.d.xms	0.569439	0.353705	0.533497	0.808723	0	0	1.59162	2.54274	0	0.262933	0.238625	0.308133	0.702424	0.9234	0.142867	1.32051	0.133277	0.0309986	0	0.381903	0	3.47047	0.178586
Week 6	Control	Symbiotic	WEEK 6_Ctrl_Symbiotic	5-26 CTRL CP2 MET	5-26 CTRL	met_41_ga4_01_56688.d.xms	0.530058	0.171036	0.291266	0.867479	0.0109201	0	1.21919	1.52731	0.94894	0.0852958	0.110619	0.260223	0.916515	0.81486	0.126765	0.884226	0.261452	0.169256	0	0.329386	0	3.76449	0.19702
Week 6	Low Protein	Aposymbiotic	WEEK 6_LP_Aposymbiotic	6-31 LP CP2 MET	6-31 LP	met_42_ga5_01_56689.d.xms	0.540466	0.308048	0.468454	0.857899	0.00660857	0	1.46353	3.42287	0.673405	0.391226	0.104084	0.261031	0.880963	0.926688	0.0968643	1.58782	0.481343	0.128812	0	0.456341	0	1.62652	0.731891
Week 0	Control	Aposymbiotic	WEEK 0_Ctrl_Aposymbiotic	1-31A CTRL BIV MET CP0	1-31A CTRL BIV	met_43_ga6_01_56690.d.xms	0.669574	0.274015	0.399964	0.817209	0	0	1.47977	1.63773	0.956289	0.256747	0.132014	0.257478	0.597325	0.843839	0.180459	1.3736	0.067721	0.266764	0	0.174353	0	3.28282	0.41068
Week 6	Low Protein	Symbiotic	WEEK 6_LP_Symbiotic	6-26 LP CP2 BIV MET	6-26 LP BIV	met_44_ga7_01_56691.d.xms	0.544713	0.189589	0.342803	0.799476	0	0	1.30793	1.56654	0	0.200373	0.136737	0.347249	0.477421	0.835035	0.153565	1.00269	0.18001	0.171418	0	0.588703	0	4.9607	0.32716
Week 6	Control	Symbiotic	WEEK 6_Ctrl_Symbiotic	6-26 CTRL CP2 BIV MET	6-26 CTRL BIV	met_45_ga8_01_56692.d.xms	0.634368	0.354223	0.213033	0.873876	0.0221672	0	1.80345	1.72079	0.880195	0.249874	0.136606	0.508246	0.571322	1.12053	0.182493	1.32945	0.263561	0.231495	0	0.309711	0	4.06943	0.525613
Week 0	Control	Aposymbiotic	WEEK 0_Ctrl_Aposymbiotic	6-31B CTRL BIV MET CP0	6-31B CTRL BIV	met_46_gb1_01_56693.d.xms	0.595261	0.414865	0.347218	0.846492	0.0143556	0	1.36868	1.62232	0	0.239101	0.220022	0.378322	1.01302	0.936862	0.240238	1.21939	0.14796	0.174899	0	0.32429	0	4.61057	NA
Week 6	Control	Aposymbiotic	WEEK 6_Ctrl_Aposymbiotic	1-31A CTRL CP2 BIV MET	1-31A CTRL BIV	met_47_gb2_01_56694.d.xms	0.700297	0.238493	0.219839	0.872723	0.0104429	0	1.15002	1.44928	1.61975	0.214977	0.107335	0.188136	0.487896	0.703439	0.150175	1.11954	1.13948	0.19643	0	0.0727567	0	2.7671	0.272039
Week 0	Control	Symbiotic	WEEK 0_Ctrl_Symbiotic	6-26 CTRL BIV MET CP0 R1	6-26 CTRL BIV	met_48_gb3_01_56695.d.xms	1.859	0.320475	0.566745	0.799984	0	0	1.3199	1.74285	1.60575	0.187259	0.285067	0.655359	1.13748	1.80358	0.270199	1.36118	0.253895	0.352198	0	0.36433	0	5.04112	0.590177
Week 0	Control	Symbiotic	WEEK 0_Ctrl_Symbiotic	6-26 CTRL BIV MET CP0 R2	6-26 CTRL BIV	met_49_gb4_01_56696.d.xms	0.791664	0.416931	0.293042	0.83356	0.0248332	0.0701468	2.03455	2.48346	0.933652	0.301386	0.261113	0.63173	0.707304	1.61548	0.295456	1.36443	0.252983	0.24561	0	0.571098	0	6.25052	0.543203
Week 6	Low Protein	Aposymbiotic	WEEK 6_LP_Aposymbiotic	5-31 LP CP2 MET	5-31 LP	met_5_ba8_01_56638.d.xms	0.502172	0.247337	0.476714	0.834986	0.0117227	0	0.963523	1.98944	1.38624	0.183512	0.173056	0.240236	0.609065	0.663559	0.120512	1.57961	0.320855	0.252014	0	0.148767	0	2.7593	0.241291
Week 6	NP	Symbiotic	WEEK 6_NP_Symbiotic	1-26 NP CP2 BIV MET	1-26 NP BIV	met_50_gb5_01_56697.d.xms	0.532919	0.419244	0.3002	0.866713	0	0	1.62815	2.31084	0.510258	0.262832	0.263629	0.583222	0.592571	0.61772	0.135366	1.55794	0.474284	0.38581	0	0.661639	0	3.18421	0.627953
Week 12	Low Protein	Symbiotic	WEEK 12_LP_Symbiotic	6-26 LP CP4 BIV MET	6-26 LP BIV	met_51_gb6_01_56701.d.xms	1.17552	0.479985	0.595924	0.785621	0.0192899	0	1.46079	1.76794	0	0.265207	0.20067	0.445919	1.33195	0.966087	0.201868	1.22753	0.176069	0.230044	0	0.534805	0	5.3739	0.505043
Week 0	Low Protein	Aposymbiotic	WEEK 0_LP_Aposymbiotic	1-31A LP BIV MET CP0	1-31A LP BIV	met_52_gb7_01_56702.d.xms	0.634227	0.360133	0.372437	0.863452	0.00366948	0	1.46453	1.8164	1.37575	0.131501	0.130109	0.280175	1.05009	0.930741	0.158028	1.24599	0.163821	0.279928	0	0.146077	0	3.51105	0.352433
Week 12	Low Protein	Symbiotic	WEEK 12_LP_Symbiotic	5-26 LP BIV CP4 MET	5-26 LP BIV	met_53_gb8_01_56703.d.xms	0.648567	0.304003	0.489032	0.862164	0.0129929	0	1.38286	2.52098	1.03188	0.300485	0.186907	0.344763	0.741862	0.766938	0.214387	1.38667	0.271351	0.119563	0	0.466886	0	4.32998	0.214513
Week 6	Low Protein	Symbiotic	WEEK 6_LP_Symbiotic	6-26 LP CP2 BIV MET	6-26 LP BIV	met_54_gc1_01_56704.d.xms	0.436685	0.189585	0.362069	0.854457	0.0139657	0	1.20434	1.88895	0.867448	0.23593	0.137408	0.299556	0.655141	0.759645	0.158778	0.99073	0.184527	0.136706	0	0.590053	0	6.41886	0.329525
Week 0	Low Protein	Aposymbiotic	WEEK 0_LP_Aposymbiotic	1-31B LP BIV MET CP0	1-31B LP BIV	met_55_gc2_01_56705.d.xms	0.496141	0.348932	0.510323	0.649908	0	0	1.42013	2.60594	0	0.35496	0.251082	0.408082	0.450698	0.865087	0.219654	1.23305	0	0	0	0.499299	0	2.88039	0.427202
Week 0	Low Protein	Symbiotic	WEEK 0_LP_Symbiotic	1-26 NP BIV MET CP0	1-26 NP BIV	met_56_gc3_01_56706.d.xms	2.1875	1.16589	0.353416	0.893566	0.0315683	0	4.93451	6.42843	3.18814	0.876495	0.508627	1.39948	1.79625	3.3941	0.598657	4.46462	1.69599	0.844477	0	1.92292	0	13.2875	1.18346
Week 12	Control	Aposymbiotic	WEEK 12_Ctrl_Aposymbiotic	1-31A CTRL CP4 BIV MET R1	1-31A CTRL BIV	met_57_gc4_01_56707.d.xms	0.402108	0.320593	0.358921	0.847904	0.0110639	0	0.994989	1.2856	1.03224	0.0821135	0.0646919	0.142368	0.334569	0.456498	0.0977552	0.84154	0.101227	0.305351	0	0.152324	0	1.93253	0.13742
Week 12	Control	Aposymbiotic	WEEK 12_Ctrl_Aposymbiotic	1-31A CTRL CP4 BIV MET R2	1-31A CTRL BIV	met_58_gc5_01_56708.d.xms	0.429885	0.373185	0.431633	0.831728	0	0	1.16839	1.66738	1.10764	0.138299	0.11978	0.162589	0.534279	0.61885	0.0927088	1.00744	0.104438	0.0257975	0	0.156125	0	1.61979	0.207573
Week 12	Control	Aposymbiotic	WEEK 12_Ctrl_Aposymbiotic	1-31A CTRL CP4 BIV MET R3	1-31A CTRL BIV	met_59_gc6_01_56709.d.xms	0.440435	0.431522	0.376678	0.763121	0	0	1.2407	1.5349	1.0873	0.14907	0.100355	0.163429	0.486503	0.675217	0.126688	1.02772	0.0431649	0	0	0.093506	0	1.99334	0.173617
Week 0	Control	Symbiotic	WEEK 0_Ctrl_Symbiotic	6-26 CTRL CP0 BIII	6-26 CTRL BIII	met_6_bb1_01_56639.d.xms	0.36321	0.102442	0.239019	0.81159	0	0	1.05639	1.19381	0	0.0722822	0.115774	0.272236	0.385995	0.805775	0.11362	0.734762	0.123288	0.255108	0	0.214488	0	3.90711	0.182952
Week 6	Control	Aposymbiotic	WEEK 6_Ctrl_Aposymbiotic	1-31A CTRL CP2 BIV MET	1-31A CTRL BIV	met_60_gc7_01_56710.d.xms	0.575911	0.383676	0.469846	0.864526	0.0144385	0	1.37641	2.32559	0.695896	0.203837	0.213761	0.368517	1.40612	0.798532	0.167603	1.18772	0.323131	0.343614	0	0.360933	0	3.19391	0.317524
Week 12	Control	Symbiotic	WEEK 12_Ctrl_Symbiotic	2-26 CTRL CP4 BIV MET R1	2-26 CTRL BIV	met_61_gc8_01_56711.d.xms	0.721219	0.446201	0.37581	0.864514	0	0	1.81879	2.377	0.657357	0.223419	0.183373	0.487203	0.667261	0.955728	0.232385	1.26391	0.472926	0.254932	0	0.633709	0	6.08166	0.494122
Week 12	Control	Symbiotic	WEEK 12_Ctrl_Symbiotic	2-26 CTRL CP4 BIV MET R2	2-26 CTRL BIV	met_62_gd1_01_56712.d.xms	1.13984	0.799027	0.471973	0.848334	0.0272391	0.0105543	1.94642	1.58308	0.718711	0.460351	0.316051	0.621795	1.04694	0.714353	0.15909	4.38769	0.599887	0.20742	0	0.57952	0	4.59566	0.566321
Week 12	Low Protein	Symbiotic	WEEK 12_LP_Symbiotic	6-26 LP CP4 BIV MET	6-26 LP BIV	met_63_gd2_01_56713.d.xms	0.497318	0.1655	0.419881	0.856729	0.0148399	0	1.40531	2.09018	0.739174	0.196501	0.178001	0.386454	0.522764	0.839704	0.187456	1.13044	0.243312	0.283432	0	0.296755	0	5.48085	0.315457
Week 6	Control	Aposymbiotic	WEEK 6_Ctrl_Aposymbiotic	3-31 CTRL CP2 MET BIII	3-31 CTRL BIII	met_7_bb2_01_56640.d.xms	0.40903	0.216232	0.415865	0.829268	0	0	1.0956	1.51204	0.606807	0.077651	0.0594152	0.0890278	0.440943	0.531586	0.0752068	0.916817	0.106818	0.167668	0	0.0725202	0	1.53771	0.193706
Week 6	Control	Aposymbiotic	WEEK 6_Ctrl_Aposymbiotic	5-31 CTRL CP2 MET	5-31 CTRL	met_8_bb3_01_56641.d.xms	0.48367	0.295345	0.34232	0.825513	0	0	1.1246	1.34129	0.577846	0.100717	0.0813504	0.0830501	0.479693	0.681945	0.0615003	0.929297	0.0534519	0.0439551	0	0.126365	0	1.17089	0.152635
Week 6	Low Protein	Symbiotic	WEEK 6_LP_Symbiotic	5-26 LP CP2 MET BIII	5-26 LP BIII	met_9_bb4_01_56642.d.xms	1.0116	0.268373	0.276592	0.858213	0	0	1.35412	2.5602	1.77716	0.260677	0.146269	0.371175	0.689198	0.794765	0.175257	1.27438	1.14142	0.245825	0	0.295848	0	4.09551	0.308021
